# Supplementary material for: The Main protease (Mpro) from SARS-CoV-2 triggers plasma clotting in vitro by activating coagulation factors VII and FXII
Source: Research Square preprint supplement (doi:10.21203/rs.3.rs-4959212/v1), 2024-11-13
Supplement: Supplementary file 1 [file 3352ca9cd543bf9ad7b9046e.xlsx]

## Sheet: Table_legend
Table legend
DynamX_output_data	center of mass measurements for every charge of each peptide and fragment found in all RAW data for the followed peptides
uptake_data	aggregation of replicate charge states and RAW data from the same state into a single measurement for each peptide, and fragment. Intensity weighted averages and deviations are reported for center of mass and uptake measurements
relative_uptake_difference	Uptake difference between the [Mpro+PPACK] state and the [Mpro] state
HDX-MS Data Summary and Experimental Parameters
States:	Mpro; Mpro+PPACK
HDX time course	15sec, 1min, 5min, 30min, 2hr
HDX undeuterated controls	3
Number of peptides	50 followed; 76 identified
Sequence coverage (%)	89.2
Average peptide length; Redundancy	2.55
Peptide filtering parameters	0.2 products/amino acid; 2 min consecutive products
Replicates	See replication table below
Significant differences	> 0.5 Da
Replication
		Number of replicates
	Time point	Mpro	Mpro+PPACK
	undeuterated controls	3	3
	15 sec	3	3
	1 min	3	3
	5 min	3	3
	30 min	3	3
	2 hr	3	3

## Sheet: DynamX_output_data
Protein	Start	End	Sequence	Modification	Fragment	MaxUptake	MHP	State	Exposure_min	File	z	RT_min	Intensity	MassCenter_Da
MPro	291	295	FTPFD			3	626.282	Mpro	0	DE-2021-04-07 M m0 2	1	5.22285	177305	626.575
MPro	291	295	FTPFD			3	626.282	Mpro	0	DE-2021-04-07 M m0 3	1	5.21831	247815	626.602
MPro	291	295	FTPFD			3	626.282	Mpro	0	DE-2021-04-07 M m0 4	1	5.21167	315944	626.583
MPro	291	295	FTPFD			3	626.282	Mpro	0.25	210407_M_15sec_01	1	5.21103	279276	627.419
MPro	291	295	FTPFD			3	626.282	Mpro	0.25	210407_M_15sec_02	1	5.22274	254168	627.419
MPro	291	295	FTPFD			3	626.282	Mpro	0.25	210407_M_15sec_03	1	5.21742	193936	627.412
MPro	291	295	FTPFD			3	626.282	Mpro	1	210407_M_60sec_01	1	5.21031	270941	627.506
MPro	291	295	FTPFD			3	626.282	Mpro	1	210407_M_60sec_02	1	5.21596	375508	627.494
MPro	291	295	FTPFD			3	626.282	Mpro	1	210407_M_60sec_03	1	5.21272	394701	627.454
MPro	291	295	FTPFD			3	626.282	Mpro	5	210407_M_300sec_01	1	5.21321	308185	627.396
MPro	291	295	FTPFD			3	626.282	Mpro	5	210407_M_300sec_02	1	5.2121	338799	627.443
MPro	291	295	FTPFD			3	626.282	Mpro	5	210407_M_300sec_03	1	5.21433	334577	627.428
MPro	291	295	FTPFD			3	626.282	Mpro	30	210407_M_1800sec_01	1	5.2102	292806	627.496
MPro	291	295	FTPFD			3	626.282	Mpro	30	210407_M_1800sec_02	1	5.21035	300144	627.479
MPro	291	295	FTPFD			3	626.282	Mpro	30	210407_M_1800sec_03	1	5.20985	326967	627.492
MPro	291	295	FTPFD			3	626.282	Mpro	120	210407_M_7200sec_01	1	5.21422	285590	627.71
MPro	291	295	FTPFD			3	626.282	Mpro	120	210407_M_7200sec_02	1	5.20813	320671	627.699
MPro	291	295	FTPFD			3	626.282	Mpro	120	210407_M_7200sec_03	1	5.20506	128497	627.58
MPro	291	295	FTPFD			3	626.282	Mpro+PPACK	0	DE-2021-04-07 M m0 2	1	5.22285	177305	626.575
MPro	291	295	FTPFD			3	626.282	Mpro+PPACK	0	DE-2021-04-07 M m0 3	1	5.21831	247815	626.602
MPro	291	295	FTPFD			3	626.282	Mpro+PPACK	0	DE-2021-04-07 M m0 4	1	5.21167	315944	626.583
MPro	291	295	FTPFD			3	626.282	Mpro+PPACK	0.25	210407_M_P_15sec_01	1	5.21472	171012	627.531
MPro	291	295	FTPFD			3	626.282	Mpro+PPACK	0.25	210407_M_P_15sec_02	1	5.21302	173112	627.625
MPro	291	295	FTPFD			3	626.282	Mpro+PPACK	0.25	210407_M_P_15sec_03	1	5.21401	150214	627.565
MPro	291	295	FTPFD			3	626.282	Mpro+PPACK	1	210407_M_P_60sec_01	1	5.21665	74572	627.628
MPro	291	295	FTPFD			3	626.282	Mpro+PPACK	1	210407_M_P_60sec_02	1	5.21349	151386	627.665
MPro	291	295	FTPFD			3	626.282	Mpro+PPACK	1	210407_M_P_60sec_03	1	5.22018	132130	627.756
MPro	291	295	FTPFD			3	626.282	Mpro+PPACK	5	210407_M_P_300sec_01	1	5.21152	107215	627.64
MPro	291	295	FTPFD			3	626.282	Mpro+PPACK	5	210407_M_P_300sec_02	1	5.21527	160347	627.838
MPro	291	295	FTPFD			3	626.282	Mpro+PPACK	5	210407_M_P_300sec_03	1	5.21247	134585	627.748
MPro	291	295	FTPFD			3	626.282	Mpro+PPACK	30	210407_M_P_1800sec_01	1	5.21053	155403	627.791
MPro	291	295	FTPFD			3	626.282	Mpro+PPACK	30	210407_M_P_1800sec_02	1	5.21474	75031	627.736
MPro	291	295	FTPFD			3	626.282	Mpro+PPACK	30	210407_M_P_1800sec_03	1	5.2181	92713	627.696
MPro	291	295	FTPFD			3	626.282	Mpro+PPACK	120	210407_M_P_7200sec_01	1	5.21582	103322	627.776
MPro	291	295	FTPFD			3	626.282	Mpro+PPACK	120	210407_M_P_7200sec_02	1	5.21152	97941	627.71
MPro	291	295	FTPFD			3	626.282	Mpro+PPACK	120	210407_M_P_7200sec_03	1	5.21412	107374	627.747
MPro	287	295	LEDEFTPFD			7	1112.48	Mpro	0	DE-2021-04-07 M m0 2	2	5.96076	131361	557.03
MPro	287	295	LEDEFTPFD			7	1112.48	Mpro	0	DE-2021-04-07 M m0 3	2	5.95412	200092	557.054
MPro	287	295	LEDEFTPFD			7	1112.48	Mpro	0	DE-2021-04-07 M m0 4	2	5.95644	247523	557.031
MPro	287	295	LEDEFTPFD			7	1112.48	Mpro	0.25	210407_M_15sec_01	2	5.95775	211195	557.394
MPro	287	295	LEDEFTPFD			7	1112.48	Mpro	0.25	210407_M_15sec_02	2	5.97288	195042	557.408
MPro	287	295	LEDEFTPFD			7	1112.48	Mpro	0.25	210407_M_15sec_03	2	5.96016	133224	557.35
MPro	287	295	LEDEFTPFD			7	1112.48	Mpro	1	210407_M_60sec_01	2	5.95584	216399	557.447
MPro	287	295	LEDEFTPFD			7	1112.48	Mpro	1	210407_M_60sec_02	2	5.95484	289879	557.433
MPro	287	295	LEDEFTPFD			7	1112.48	Mpro	1	210407_M_60sec_03	2	5.95003	295582	557.418
MPro	287	295	LEDEFTPFD			7	1112.48	Mpro	5	210407_M_300sec_01	2	5.95007	267391	557.401
MPro	287	295	LEDEFTPFD			7	1112.48	Mpro	5	210407_M_300sec_02	2	5.95202	259611	557.416
MPro	287	295	LEDEFTPFD			7	1112.48	Mpro	5	210407_M_300sec_03	2	5.95172	261042	557.412
MPro	287	295	LEDEFTPFD			7	1112.48	Mpro	30	210407_M_1800sec_01	2	5.94457	226841	557.487
MPro	287	295	LEDEFTPFD			7	1112.48	Mpro	30	210407_M_1800sec_02	2	5.94982	224400	557.476
MPro	287	295	LEDEFTPFD			7	1112.48	Mpro	30	210407_M_1800sec_03	2	5.94841	257558	557.491
MPro	287	295	LEDEFTPFD			7	1112.48	Mpro	120	210407_M_7200sec_01	2	5.95346	225720	557.592
MPro	287	295	LEDEFTPFD			7	1112.48	Mpro	120	210407_M_7200sec_02	2	5.95016	219334	557.607
MPro	287	295	LEDEFTPFD			7	1112.48	Mpro	120	210407_M_7200sec_03	2	5.93946	107418	557.562
MPro	287	295	LEDEFTPFD			7	1112.48	Mpro+PPACK	0	DE-2021-04-07 M m0 2	2	5.96076	131361	557.03
MPro	287	295	LEDEFTPFD			7	1112.48	Mpro+PPACK	0	DE-2021-04-07 M m0 3	2	5.95412	200092	557.054
MPro	287	295	LEDEFTPFD			7	1112.48	Mpro+PPACK	0	DE-2021-04-07 M m0 4	2	5.95644	247523	557.031
MPro	287	295	LEDEFTPFD			7	1112.48	Mpro+PPACK	0.25	210407_M_P_15sec_01	2	5.95898	118619	557.47
MPro	287	295	LEDEFTPFD			7	1112.48	Mpro+PPACK	0.25	210407_M_P_15sec_02	2	5.95978	104954	557.426
MPro	287	295	LEDEFTPFD			7	1112.48	Mpro+PPACK	0.25	210407_M_P_15sec_03	2	5.95414	94933	557.416
MPro	287	295	LEDEFTPFD			7	1112.48	Mpro+PPACK	1	210407_M_P_60sec_01	2	5.95348	50240	557.478
MPro	287	295	LEDEFTPFD			7	1112.48	Mpro+PPACK	1	210407_M_P_60sec_02	2	5.95079	125108	557.585
MPro	287	295	LEDEFTPFD			7	1112.48	Mpro+PPACK	5	210407_M_P_300sec_02	2	5.95786	127803	557.611
MPro	287	295	LEDEFTPFD			7	1112.48	Mpro+PPACK	5	210407_M_P_300sec_03	2	5.95518	108571	557.602
MPro	287	295	LEDEFTPFD			7	1112.48	Mpro+PPACK	30	210407_M_P_1800sec_01	2	5.94907	111890	557.736
MPro	287	295	LEDEFTPFD			7	1112.48	Mpro+PPACK	30	210407_M_P_1800sec_02	2	5.95105	58865	557.717
MPro	287	295	LEDEFTPFD			7	1112.48	Mpro+PPACK	30	210407_M_P_1800sec_03	2	5.95506	72158	557.671
MPro	287	295	LEDEFTPFD			7	1112.48	Mpro+PPACK	120	210407_M_P_7200sec_01	2	5.94996	77804	557.754
MPro	287	295	LEDEFTPFD			7	1112.48	Mpro+PPACK	120	210407_M_P_7200sec_02	2	5.9437	89671	557.749
MPro	287	295	LEDEFTPFD			7	1112.48	Mpro+PPACK	120	210407_M_P_7200sec_03	2	5.96037	83421	557.891
MPro	269	282	KELLQNGMNGRTIL			13	1586.87	Mpro	0	DE-2021-04-07 M m0 2	3	4.70168	286096	529.94
MPro	269	282	KELLQNGMNGRTIL			13	1586.87	Mpro	0	DE-2021-04-07 M m0 3	3	4.69614	417376	529.947
MPro	269	282	KELLQNGMNGRTIL			13	1586.87	Mpro	0	DE-2021-04-07 M m0 4	3	4.69513	494350	529.929
MPro	269	282	KELLQNGMNGRTIL			13	1586.87	Mpro	0.25	210407_M_15sec_01	3	4.69008	391026	530.967
MPro	269	282	KELLQNGMNGRTIL			13	1586.87	Mpro	0.25	210407_M_15sec_02	3	4.70041	390390	530.971
MPro	269	282	KELLQNGMNGRTIL			13	1586.87	Mpro	0.25	210407_M_15sec_03	3	4.69167	310895	530.975
MPro	269	282	KELLQNGMNGRTIL			13	1586.87	Mpro	1	210407_M_60sec_01	3	4.68773	423685	531.36
MPro	269	282	KELLQNGMNGRTIL			13	1586.87	Mpro	1	210407_M_60sec_02	3	4.69232	557610	531.367
MPro	269	282	KELLQNGMNGRTIL			13	1586.87	Mpro	1	210407_M_60sec_03	3	4.68925	581953	531.379
MPro	269	282	KELLQNGMNGRTIL			13	1586.87	Mpro	5	210407_M_300sec_01	3	4.68899	491770	531.769
MPro	269	282	KELLQNGMNGRTIL			13	1586.87	Mpro	5	210407_M_300sec_02	3	4.68557	540889	531.758
MPro	269	282	KELLQNGMNGRTIL			13	1586.87	Mpro	5	210407_M_300sec_03	3	4.69124	530424	531.774
MPro	269	282	KELLQNGMNGRTIL			13	1586.87	Mpro	30	210407_M_1800sec_01	3	4.68486	482317	531.982
MPro	269	282	KELLQNGMNGRTIL			13	1586.87	Mpro	30	210407_M_1800sec_02	3	4.6845	505274	531.959
MPro	269	282	KELLQNGMNGRTIL			13	1586.87	Mpro	30	210407_M_1800sec_03	3	4.68434	524961	531.972
MPro	269	282	KELLQNGMNGRTIL			13	1586.87	Mpro	120	210407_M_7200sec_01	3	4.68419	495120	532.06
MPro	269	282	KELLQNGMNGRTIL			13	1586.87	Mpro	120	210407_M_7200sec_02	3	4.68515	495944	531.989
MPro	269	282	KELLQNGMNGRTIL			13	1586.87	Mpro	120	210407_M_7200sec_03	3	4.68516	250983	531.884
MPro	269	282	KELLQNGMNGRTIL			13	1586.87	Mpro+PPACK	0	DE-2021-04-07 M m0 2	3	4.70168	286096	529.94
MPro	269	282	KELLQNGMNGRTIL			13	1586.87	Mpro+PPACK	0	DE-2021-04-07 M m0 3	3	4.69614	417376	529.947
MPro	269	282	KELLQNGMNGRTIL			13	1586.87	Mpro+PPACK	0	DE-2021-04-07 M m0 4	3	4.69513	494350	529.929
MPro	269	282	KELLQNGMNGRTIL			13	1586.87	Mpro+PPACK	0.25	210407_M_P_15sec_01	3	4.69834	272055	530.978
MPro	269	282	KELLQNGMNGRTIL			13	1586.87	Mpro+PPACK	0.25	210407_M_P_15sec_02	3	4.69252	244877	531.014
MPro	269	282	KELLQNGMNGRTIL			13	1586.87	Mpro+PPACK	0.25	210407_M_P_15sec_03	3	4.69417	242176	530.96
MPro	269	282	KELLQNGMNGRTIL			13	1586.87	Mpro+PPACK	1	210407_M_P_60sec_01	3	4.69559	121463	531.286
MPro	269	282	KELLQNGMNGRTIL			13	1586.87	Mpro+PPACK	1	210407_M_P_60sec_02	3	4.69154	251758	531.496
MPro	269	282	KELLQNGMNGRTIL			13	1586.87	Mpro+PPACK	1	210407_M_P_60sec_03	3	4.69684	203340	531.354
MPro	269	282	KELLQNGMNGRTIL			13	1586.87	Mpro+PPACK	5	210407_M_P_300sec_01	3	4.68732	168039	531.692
MPro	269	282	KELLQNGMNGRTIL			13	1586.87	Mpro+PPACK	5	210407_M_P_300sec_02	3	4.69433	256727	531.792
MPro	269	282	KELLQNGMNGRTIL			13	1586.87	Mpro+PPACK	5	210407_M_P_300sec_03	3	4.69029	233012	531.623
MPro	269	282	KELLQNGMNGRTIL			13	1586.87	Mpro+PPACK	30	210407_M_P_1800sec_01	3	4.68751	256368	531.858
MPro	269	282	KELLQNGMNGRTIL			13	1586.87	Mpro+PPACK	30	210407_M_P_1800sec_02	3	4.69057	109877	531.976
MPro	269	282	KELLQNGMNGRTIL			13	1586.87	Mpro+PPACK	30	210407_M_P_1800sec_03	3	4.69152	156725	531.908
MPro	269	282	KELLQNGMNGRTIL			13	1586.87	Mpro+PPACK	120	210407_M_P_7200sec_01	3	4.69083	165488	531.829
MPro	269	282	KELLQNGMNGRTIL			13	1586.87	Mpro+PPACK	120	210407_M_P_7200sec_02	3	4.68334	179794	532.137
MPro	269	282	KELLQNGMNGRTIL			13	1586.87	Mpro+PPACK	120	210407_M_P_7200sec_03	3	4.68874	170491	532.085
MPro	269	278	KELLQNGMNG			9	1103.55	Mpro	0	DE-2021-04-07 M m0 2	1	3.88676	35384	1104.1
MPro	269	278	KELLQNGMNG			9	1103.55	Mpro	0	DE-2021-04-07 M m0 2	2	3.89129	272208	552.568
MPro	269	278	KELLQNGMNG			9	1103.55	Mpro	0	DE-2021-04-07 M m0 3	1	3.88434	44827	1104.1
MPro	269	278	KELLQNGMNG			9	1103.55	Mpro	0	DE-2021-04-07 M m0 3	2	3.88841	367108	552.572
MPro	269	278	KELLQNGMNG			9	1103.55	Mpro	0	DE-2021-04-07 M m0 4	1	3.87664	49520	1104.17
MPro	269	278	KELLQNGMNG			9	1103.55	Mpro	0	DE-2021-04-07 M m0 4	2	3.87983	469625	552.57
MPro	269	278	KELLQNGMNG			9	1103.55	Mpro	0.25	210407_M_15sec_01	1	3.87747	47193	1106.61
MPro	269	278	KELLQNGMNG			9	1103.55	Mpro	0.25	210407_M_15sec_01	2	3.87906	391963	553.801
MPro	269	278	KELLQNGMNG			9	1103.55	Mpro	0.25	210407_M_15sec_02	1	3.88438	41119	1106.53
MPro	269	278	KELLQNGMNG			9	1103.55	Mpro	0.25	210407_M_15sec_02	2	3.89034	346669	553.87
MPro	269	278	KELLQNGMNG			9	1103.55	Mpro	0.25	210407_M_15sec_03	1	3.88045	26613	1106.9
MPro	269	278	KELLQNGMNG			9	1103.55	Mpro	0.25	210407_M_15sec_03	2	3.88268	281699	553.82
MPro	269	278	KELLQNGMNG			9	1103.55	Mpro	1	210407_M_60sec_01	1	3.87502	52562	1107.13
MPro	269	278	KELLQNGMNG			9	1103.55	Mpro	1	210407_M_60sec_01	2	3.87672	372678	554.114
MPro	269	278	KELLQNGMNG			9	1103.55	Mpro	1	210407_M_60sec_02	1	3.87957	71409	1107.2
MPro	269	278	KELLQNGMNG			9	1103.55	Mpro	1	210407_M_60sec_02	2	3.88281	500559	554.109
MPro	269	278	KELLQNGMNG			9	1103.55	Mpro	1	210407_M_60sec_03	1	3.87416	65491	1107.13
MPro	269	278	KELLQNGMNG			9	1103.55	Mpro	1	210407_M_60sec_03	2	3.87825	522223	554.104
MPro	269	278	KELLQNGMNG			9	1103.55	Mpro	5	210407_M_300sec_01	1	3.87302	58734	1107.26
MPro	269	278	KELLQNGMNG			9	1103.55	Mpro	5	210407_M_300sec_01	2	3.87737	439009	554.16
MPro	269	278	KELLQNGMNG			9	1103.55	Mpro	5	210407_M_300sec_02	1	3.87171	59332	1107.19
MPro	269	278	KELLQNGMNG			9	1103.55	Mpro	5	210407_M_300sec_02	2	3.87711	457176	554.172
MPro	269	278	KELLQNGMNG			9	1103.55	Mpro	5	210407_M_300sec_03	1	3.88234	61474	1107.28
MPro	269	278	KELLQNGMNG			9	1103.55	Mpro	5	210407_M_300sec_03	2	3.88447	451936	554.174
MPro	269	278	KELLQNGMNG			9	1103.55	Mpro	30	210407_M_1800sec_01	1	3.87483	25582	1109.27
MPro	269	278	KELLQNGMNG			9	1103.55	Mpro	30	210407_M_1800sec_01	2	3.8774	438911	554.376
MPro	269	278	KELLQNGMNG			9	1103.55	Mpro	30	210407_M_1800sec_02	1	3.86808	51630	1107.59
MPro	269	278	KELLQNGMNG			9	1103.55	Mpro	30	210407_M_1800sec_02	2	3.87339	417651	554.479
MPro	269	278	KELLQNGMNG			9	1103.55	Mpro	30	210407_M_1800sec_03	1	3.86978	58673	1107.96
MPro	269	278	KELLQNGMNG			9	1103.55	Mpro	30	210407_M_1800sec_03	2	3.87343	438475	554.384
MPro	269	278	KELLQNGMNG			9	1103.55	Mpro	120	210407_M_7200sec_01	1	3.86935	26613	1109.21
MPro	269	278	KELLQNGMNG			9	1103.55	Mpro	120	210407_M_7200sec_01	2	3.87297	433156	554.406
MPro	269	278	KELLQNGMNG			9	1103.55	Mpro	120	210407_M_7200sec_02	1	3.86997	45399	1107.78
MPro	269	278	KELLQNGMNG			9	1103.55	Mpro	120	210407_M_7200sec_02	2	3.87408	418319	554.377
MPro	269	278	KELLQNGMNG			9	1103.55	Mpro	120	210407_M_7200sec_03	2	3.87376	196275	554.262
MPro	269	278	KELLQNGMNG			9	1103.55	Mpro+PPACK	0	DE-2021-04-07 M m0 2	1	3.88676	35384	1104.1
MPro	269	278	KELLQNGMNG			9	1103.55	Mpro+PPACK	0	DE-2021-04-07 M m0 2	2	3.89129	272208	552.568
MPro	269	278	KELLQNGMNG			9	1103.55	Mpro+PPACK	0	DE-2021-04-07 M m0 3	1	3.88434	44827	1104.1
MPro	269	278	KELLQNGMNG			9	1103.55	Mpro+PPACK	0	DE-2021-04-07 M m0 3	2	3.88841	367108	552.572
MPro	269	278	KELLQNGMNG			9	1103.55	Mpro+PPACK	0	DE-2021-04-07 M m0 4	1	3.87664	49520	1104.17
MPro	269	278	KELLQNGMNG			9	1103.55	Mpro+PPACK	0	DE-2021-04-07 M m0 4	2	3.87983	469625	552.57
MPro	269	278	KELLQNGMNG			9	1103.55	Mpro+PPACK	0.25	210407_M_P_15sec_01	1	3.8466	55200	1106.64
MPro	269	278	KELLQNGMNG			9	1103.55	Mpro+PPACK	0.25	210407_M_P_15sec_01	2	3.84271	85705	553.808
MPro	269	278	KELLQNGMNG			9	1103.55	Mpro+PPACK	0.25	210407_M_P_15sec_02	1	3.85088	48792	1106.58
MPro	269	278	KELLQNGMNG			9	1103.55	Mpro+PPACK	0.25	210407_M_P_15sec_02	2	3.84971	65629	553.796
MPro	269	278	KELLQNGMNG			9	1103.55	Mpro+PPACK	0.25	210407_M_P_15sec_03	1	3.84582	44484	1106.5
MPro	269	278	KELLQNGMNG			9	1103.55	Mpro+PPACK	0.25	210407_M_P_15sec_03	2	3.84599	69473	553.802
MPro	269	278	KELLQNGMNG			9	1103.55	Mpro+PPACK	1	210407_M_P_60sec_01	1	3.85288	12417	1106.63
MPro	269	278	KELLQNGMNG			9	1103.55	Mpro+PPACK	1	210407_M_P_60sec_01	2	3.85057	21048	554.23
MPro	269	278	KELLQNGMNG			9	1103.55	Mpro+PPACK	1	210407_M_P_60sec_02	1	3.84892	50905	1107.13
MPro	269	278	KELLQNGMNG			9	1103.55	Mpro+PPACK	1	210407_M_P_60sec_02	2	3.85247	71184	554.074
MPro	269	278	KELLQNGMNG			9	1103.55	Mpro+PPACK	1	210407_M_P_60sec_03	1	3.84693	32319	1107.23
MPro	269	278	KELLQNGMNG			9	1103.55	Mpro+PPACK	1	210407_M_P_60sec_03	2	3.85487	45474	554.031
MPro	269	278	KELLQNGMNG			9	1103.55	Mpro+PPACK	5	210407_M_P_300sec_01	1	3.84653	24701	1106.91
MPro	269	278	KELLQNGMNG			9	1103.55	Mpro+PPACK	5	210407_M_P_300sec_01	2	3.8451	35139	554.014
MPro	269	278	KELLQNGMNG			9	1103.55	Mpro+PPACK	5	210407_M_P_300sec_02	1	3.85004	33357	1107.52
MPro	269	278	KELLQNGMNG			9	1103.55	Mpro+PPACK	5	210407_M_P_300sec_02	2	3.85214	66965	554.094
MPro	269	278	KELLQNGMNG			9	1103.55	Mpro+PPACK	5	210407_M_P_300sec_03	1	3.84918	41615	1107.31
MPro	269	278	KELLQNGMNG			9	1103.55	Mpro+PPACK	5	210407_M_P_300sec_03	2	3.84981	61733	554.082
MPro	269	278	KELLQNGMNG			9	1103.55	Mpro+PPACK	30	210407_M_P_1800sec_01	1	3.84151	38181	1107.63
MPro	269	278	KELLQNGMNG			9	1103.55	Mpro+PPACK	30	210407_M_P_1800sec_01	2	3.8428	65017	554.3
MPro	269	278	KELLQNGMNG			9	1103.55	Mpro+PPACK	30	210407_M_P_1800sec_02	1	3.84566	20268	1107.93
MPro	269	278	KELLQNGMNG			9	1103.55	Mpro+PPACK	30	210407_M_P_1800sec_02	2	3.8428	30009	554.102
MPro	269	278	KELLQNGMNG			9	1103.55	Mpro+PPACK	30	210407_M_P_1800sec_03	1	3.8449	31473	1107.48
MPro	269	278	KELLQNGMNG			9	1103.55	Mpro+PPACK	30	210407_M_P_1800sec_03	2	3.84548	48977	554.288
MPro	269	278	KELLQNGMNG			9	1103.55	Mpro+PPACK	120	210407_M_P_7200sec_01	1	3.84958	31610	1107.62
MPro	269	278	KELLQNGMNG			9	1103.55	Mpro+PPACK	120	210407_M_P_7200sec_01	2	3.8421	64470	554.268
MPro	269	278	KELLQNGMNG			9	1103.55	Mpro+PPACK	120	210407_M_P_7200sec_02	1	3.84667	30826	1107.52
MPro	269	278	KELLQNGMNG			9	1103.55	Mpro+PPACK	120	210407_M_P_7200sec_02	2	3.84115	68841	554.295
MPro	269	278	KELLQNGMNG			9	1103.55	Mpro+PPACK	120	210407_M_P_7200sec_03	1	3.85016	34639	1107.64
MPro	269	278	KELLQNGMNG			9	1103.55	Mpro+PPACK	120	210407_M_P_7200sec_03	2	3.84176	72908	554.322
MPro	246	262	HVDILGPLSAQTGIAVL			15	1703.97	Mpro	0	DE-2021-04-07 M m0 2	2	6.20303	402985	852.955
MPro	246	262	HVDILGPLSAQTGIAVL			15	1703.97	Mpro	0	DE-2021-04-07 M m0 3	2	6.19855	584061	852.951
MPro	246	262	HVDILGPLSAQTGIAVL			15	1703.97	Mpro	0	DE-2021-04-07 M m0 4	2	6.21242	777046	852.948
MPro	246	262	HVDILGPLSAQTGIAVL			15	1703.97	Mpro	0.25	210407_M_15sec_01	2	6.20983	703173	854.333
MPro	246	262	HVDILGPLSAQTGIAVL			15	1703.97	Mpro	0.25	210407_M_15sec_02	2	6.21926	765065	854.4
MPro	246	262	HVDILGPLSAQTGIAVL			15	1703.97	Mpro	0.25	210407_M_15sec_03	2	6.20738	548543	854.415
MPro	246	262	HVDILGPLSAQTGIAVL			15	1703.97	Mpro	1	210407_M_60sec_01	2	6.20121	774526	854.896
MPro	246	262	HVDILGPLSAQTGIAVL			15	1703.97	Mpro	1	210407_M_60sec_02	2	6.20019	1014341	854.918
MPro	246	262	HVDILGPLSAQTGIAVL			15	1703.97	Mpro	1	210407_M_60sec_03	2	6.19802	1139125	854.932
MPro	246	262	HVDILGPLSAQTGIAVL			15	1703.97	Mpro	5	210407_M_300sec_01	2	6.19822	847828	855.482
MPro	246	262	HVDILGPLSAQTGIAVL			15	1703.97	Mpro	5	210407_M_300sec_02	2	6.19298	930092	855.494
MPro	246	262	HVDILGPLSAQTGIAVL			15	1703.97	Mpro	5	210407_M_300sec_03	2	6.19923	1001900	855.523
MPro	246	262	HVDILGPLSAQTGIAVL			15	1703.97	Mpro	30	210407_M_1800sec_01	2	6.19092	807882	856.47
MPro	246	262	HVDILGPLSAQTGIAVL			15	1703.97	Mpro	30	210407_M_1800sec_02	2	6.18821	792296	856.451
MPro	246	262	HVDILGPLSAQTGIAVL			15	1703.97	Mpro	30	210407_M_1800sec_03	2	6.18944	931949	856.493
MPro	246	262	HVDILGPLSAQTGIAVL			15	1703.97	Mpro	120	210407_M_7200sec_01	2	6.19715	718702	856.689
MPro	246	262	HVDILGPLSAQTGIAVL			15	1703.97	Mpro	120	210407_M_7200sec_02	2	6.18717	878492	856.682
MPro	246	262	HVDILGPLSAQTGIAVL			15	1703.97	Mpro	120	210407_M_7200sec_03	2	6.18589	407180	856.516
MPro	246	262	HVDILGPLSAQTGIAVL			15	1703.97	Mpro+PPACK	0	DE-2021-04-07 M m0 2	2	6.20303	402985	852.955
MPro	246	262	HVDILGPLSAQTGIAVL			15	1703.97	Mpro+PPACK	0	DE-2021-04-07 M m0 3	2	6.19855	584061	852.951
MPro	246	262	HVDILGPLSAQTGIAVL			15	1703.97	Mpro+PPACK	0	DE-2021-04-07 M m0 4	2	6.21242	777046	852.948
MPro	246	262	HVDILGPLSAQTGIAVL			15	1703.97	Mpro+PPACK	0.25	210407_M_P_15sec_01	2	6.2065	515035	854.414
MPro	246	262	HVDILGPLSAQTGIAVL			15	1703.97	Mpro+PPACK	0.25	210407_M_P_15sec_02	2	6.20369	489399	854.472
MPro	246	262	HVDILGPLSAQTGIAVL			15	1703.97	Mpro+PPACK	0.25	210407_M_P_15sec_03	2	6.20154	435029	854.434
MPro	246	262	HVDILGPLSAQTGIAVL			15	1703.97	Mpro+PPACK	1	210407_M_P_60sec_01	2	6.19991	300357	854.853
MPro	246	262	HVDILGPLSAQTGIAVL			15	1703.97	Mpro+PPACK	1	210407_M_P_60sec_02	2	6.19987	429406	855.007
MPro	246	262	HVDILGPLSAQTGIAVL			15	1703.97	Mpro+PPACK	1	210407_M_P_60sec_03	2	6.20736	383074	854.982
MPro	246	262	HVDILGPLSAQTGIAVL			15	1703.97	Mpro+PPACK	5	210407_M_P_300sec_01	2	6.19746	349176	855.348
MPro	246	262	HVDILGPLSAQTGIAVL			15	1703.97	Mpro+PPACK	5	210407_M_P_300sec_02	2	6.21042	439205	855.597
MPro	246	262	HVDILGPLSAQTGIAVL			15	1703.97	Mpro+PPACK	5	210407_M_P_300sec_03	2	6.19536	415713	855.555
MPro	246	262	HVDILGPLSAQTGIAVL			15	1703.97	Mpro+PPACK	30	210407_M_P_1800sec_01	2	6.18858	390170	856.359
MPro	246	262	HVDILGPLSAQTGIAVL			15	1703.97	Mpro+PPACK	30	210407_M_P_1800sec_02	2	6.1956	264325	856.218
MPro	246	262	HVDILGPLSAQTGIAVL			15	1703.97	Mpro+PPACK	30	210407_M_P_1800sec_03	2	6.20271	250262	856.653
MPro	246	262	HVDILGPLSAQTGIAVL			15	1703.97	Mpro+PPACK	120	210407_M_P_7200sec_01	2	6.19465	302878	856.692
MPro	246	262	HVDILGPLSAQTGIAVL			15	1703.97	Mpro+PPACK	120	210407_M_P_7200sec_02	2	6.19187	276075	856.854
MPro	246	262	HVDILGPLSAQTGIAVL			15	1703.97	Mpro+PPACK	120	210407_M_P_7200sec_03	2	6.2046	327603	856.614
MPro	246	260	HVDILGPLSAQTGIA			13	1491.82	Mpro	0	DE-2021-04-07 M m0 2	1	5.49969	10553	1492.24
MPro	246	260	HVDILGPLSAQTGIA			13	1491.82	Mpro	0	DE-2021-04-07 M m0 2	2	5.50496	263318	746.803
MPro	246	260	HVDILGPLSAQTGIA			13	1491.82	Mpro	0	DE-2021-04-07 M m0 2	3	5.50354	13848	498.093
MPro	246	260	HVDILGPLSAQTGIA			13	1491.82	Mpro	0	DE-2021-04-07 M m0 3	1	5.49878	16356	1492.55
MPro	246	260	HVDILGPLSAQTGIA			13	1491.82	Mpro	0	DE-2021-04-07 M m0 3	2	5.50009	326935	746.822
MPro	246	260	HVDILGPLSAQTGIA			13	1491.82	Mpro	0	DE-2021-04-07 M m0 3	3	5.50499	17863	498.092
MPro	246	260	HVDILGPLSAQTGIA			13	1491.82	Mpro	0	DE-2021-04-07 M m0 4	1	5.50761	21274	1492.59
MPro	246	260	HVDILGPLSAQTGIA			13	1491.82	Mpro	0	DE-2021-04-07 M m0 4	2	5.50913	435564	746.826
MPro	246	260	HVDILGPLSAQTGIA			13	1491.82	Mpro	0	DE-2021-04-07 M m0 4	3	5.51072	20446	498.089
MPro	246	260	HVDILGPLSAQTGIA			13	1491.82	Mpro	0.25	210407_M_15sec_01	1	5.50836	16285	1493.7
MPro	246	260	HVDILGPLSAQTGIA			13	1491.82	Mpro	0.25	210407_M_15sec_01	2	5.50802	378052	747.515
MPro	246	260	HVDILGPLSAQTGIA			13	1491.82	Mpro	0.25	210407_M_15sec_01	3	5.50406	13882	498.427
MPro	246	260	HVDILGPLSAQTGIA			13	1491.82	Mpro	0.25	210407_M_15sec_02	1	5.51583	13278	1493.85
MPro	246	260	HVDILGPLSAQTGIA			13	1491.82	Mpro	0.25	210407_M_15sec_02	2	5.51541	351383	747.545
MPro	246	260	HVDILGPLSAQTGIA			13	1491.82	Mpro	0.25	210407_M_15sec_03	1	5.50707	7255	1493.34
MPro	246	260	HVDILGPLSAQTGIA			13	1491.82	Mpro	0.25	210407_M_15sec_03	2	5.50841	256448	747.518
MPro	246	260	HVDILGPLSAQTGIA			13	1491.82	Mpro	1	210407_M_60sec_01	1	5.50494	19990	1495.14
MPro	246	260	HVDILGPLSAQTGIA			13	1491.82	Mpro	1	210407_M_60sec_01	2	5.50493	364762	747.924
MPro	246	260	HVDILGPLSAQTGIA			13	1491.82	Mpro	1	210407_M_60sec_01	3	5.50801	18350	498.588
MPro	246	260	HVDILGPLSAQTGIA			13	1491.82	Mpro	1	210407_M_60sec_02	1	5.50068	27473	1494.84
MPro	246	260	HVDILGPLSAQTGIA			13	1491.82	Mpro	1	210407_M_60sec_02	2	5.50239	509131	747.94
MPro	246	260	HVDILGPLSAQTGIA			13	1491.82	Mpro	1	210407_M_60sec_02	3	5.50038	23118	498.577
MPro	246	260	HVDILGPLSAQTGIA			13	1491.82	Mpro	1	210407_M_60sec_03	1	5.49816	26868	1494.73
MPro	246	260	HVDILGPLSAQTGIA			13	1491.82	Mpro	1	210407_M_60sec_03	2	5.49558	534116	747.936
MPro	246	260	HVDILGPLSAQTGIA			13	1491.82	Mpro	1	210407_M_60sec_03	3	5.4955	24241	498.596
MPro	246	260	HVDILGPLSAQTGIA			13	1491.82	Mpro	5	210407_M_300sec_01	1	5.49723	18026	1496.22
MPro	246	260	HVDILGPLSAQTGIA			13	1491.82	Mpro	5	210407_M_300sec_01	2	5.4981	423184	748.537
MPro	246	260	HVDILGPLSAQTGIA			13	1491.82	Mpro	5	210407_M_300sec_01	3	5.50075	11256	499.123
MPro	246	260	HVDILGPLSAQTGIA			13	1491.82	Mpro	5	210407_M_300sec_02	1	5.49367	21370	1496.25
MPro	246	260	HVDILGPLSAQTGIA			13	1491.82	Mpro	5	210407_M_300sec_02	2	5.49622	434441	748.601
MPro	246	260	HVDILGPLSAQTGIA			13	1491.82	Mpro	5	210407_M_300sec_02	3	5.49272	20217	498.932
MPro	246	260	HVDILGPLSAQTGIA			13	1491.82	Mpro	5	210407_M_300sec_03	1	5.49939	19282	1496.23
MPro	246	260	HVDILGPLSAQTGIA			13	1491.82	Mpro	5	210407_M_300sec_03	2	5.49883	459523	748.606
MPro	246	260	HVDILGPLSAQTGIA			13	1491.82	Mpro	5	210407_M_300sec_03	3	5.49638	21054	498.952
MPro	246	260	HVDILGPLSAQTGIA			13	1491.82	Mpro	30	210407_M_1800sec_01	1	5.48552	12594	1497.91
MPro	246	260	HVDILGPLSAQTGIA			13	1491.82	Mpro	30	210407_M_1800sec_01	2	5.48587	413085	749.651
MPro	246	260	HVDILGPLSAQTGIA			13	1491.82	Mpro	30	210407_M_1800sec_01	3	5.48918	11010	499.456
MPro	246	260	HVDILGPLSAQTGIA			13	1491.82	Mpro	30	210407_M_1800sec_02	1	5.49116	18579	1498.3
MPro	246	260	HVDILGPLSAQTGIA			13	1491.82	Mpro	30	210407_M_1800sec_02	2	5.49133	425926	749.591
MPro	246	260	HVDILGPLSAQTGIA			13	1491.82	Mpro	30	210407_M_1800sec_03	1	5.49074	11372	1498.34
MPro	246	260	HVDILGPLSAQTGIA			13	1491.82	Mpro	30	210407_M_1800sec_03	2	5.49121	406853	749.623
MPro	246	260	HVDILGPLSAQTGIA			13	1491.82	Mpro	30	210407_M_1800sec_03	3	5.49004	12332	499.441
MPro	246	260	HVDILGPLSAQTGIA			13	1491.82	Mpro	120	210407_M_7200sec_01	1	5.48913	11597	1498.74
MPro	246	260	HVDILGPLSAQTGIA			13	1491.82	Mpro	120	210407_M_7200sec_01	2	5.48657	323960	749.894
MPro	246	260	HVDILGPLSAQTGIA			13	1491.82	Mpro	120	210407_M_7200sec_02	1	5.49351	18798	1498.37
MPro	246	260	HVDILGPLSAQTGIA			13	1491.82	Mpro	120	210407_M_7200sec_02	2	5.49183	402210	749.802
MPro	246	260	HVDILGPLSAQTGIA			13	1491.82	Mpro	120	210407_M_7200sec_03	2	5.48746	192404	749.688
MPro	246	260	HVDILGPLSAQTGIA			13	1491.82	Mpro+PPACK	0	DE-2021-04-07 M m0 2	1	5.49969	10553	1492.24
MPro	246	260	HVDILGPLSAQTGIA			13	1491.82	Mpro+PPACK	0	DE-2021-04-07 M m0 2	2	5.50496	263318	746.803
MPro	246	260	HVDILGPLSAQTGIA			13	1491.82	Mpro+PPACK	0	DE-2021-04-07 M m0 2	3	5.50354	13848	498.093
MPro	246	260	HVDILGPLSAQTGIA			13	1491.82	Mpro+PPACK	0	DE-2021-04-07 M m0 3	1	5.49878	16356	1492.55
MPro	246	260	HVDILGPLSAQTGIA			13	1491.82	Mpro+PPACK	0	DE-2021-04-07 M m0 3	2	5.50009	326935	746.822
MPro	246	260	HVDILGPLSAQTGIA			13	1491.82	Mpro+PPACK	0	DE-2021-04-07 M m0 3	3	5.50499	17863	498.092
MPro	246	260	HVDILGPLSAQTGIA			13	1491.82	Mpro+PPACK	0	DE-2021-04-07 M m0 4	1	5.50761	21274	1492.59
MPro	246	260	HVDILGPLSAQTGIA			13	1491.82	Mpro+PPACK	0	DE-2021-04-07 M m0 4	2	5.50913	435564	746.826
MPro	246	260	HVDILGPLSAQTGIA			13	1491.82	Mpro+PPACK	0	DE-2021-04-07 M m0 4	3	5.51072	20446	498.089
MPro	246	260	HVDILGPLSAQTGIA			13	1491.82	Mpro+PPACK	0.25	210407_M_P_15sec_01	1	5.51675	8737	1493.39
MPro	246	260	HVDILGPLSAQTGIA			13	1491.82	Mpro+PPACK	0.25	210407_M_P_15sec_01	2	5.51332	223480	747.535
MPro	246	260	HVDILGPLSAQTGIA			13	1491.82	Mpro+PPACK	0.25	210407_M_P_15sec_01	3	5.50984	10676	498.453
MPro	246	260	HVDILGPLSAQTGIA			13	1491.82	Mpro+PPACK	0.25	210407_M_P_15sec_02	2	5.50502	213884	747.575
MPro	246	260	HVDILGPLSAQTGIA			13	1491.82	Mpro+PPACK	0.25	210407_M_P_15sec_03	1	5.50321	6858	1494.29
MPro	246	260	HVDILGPLSAQTGIA			13	1491.82	Mpro+PPACK	0.25	210407_M_P_15sec_03	2	5.50529	199010	747.551
MPro	246	260	HVDILGPLSAQTGIA			13	1491.82	Mpro+PPACK	1	210407_M_P_60sec_01	2	5.50007	101125	747.917
MPro	246	260	HVDILGPLSAQTGIA			13	1491.82	Mpro+PPACK	1	210407_M_P_60sec_02	1	5.50777	7063	1495.37
MPro	246	260	HVDILGPLSAQTGIA			13	1491.82	Mpro+PPACK	1	210407_M_P_60sec_02	2	5.50507	231233	748.062
MPro	246	260	HVDILGPLSAQTGIA			13	1491.82	Mpro+PPACK	1	210407_M_P_60sec_03	2	5.50684	154416	747.796
MPro	246	260	HVDILGPLSAQTGIA			13	1491.82	Mpro+PPACK	5	210407_M_P_300sec_01	2	5.49575	157127	748.528
MPro	246	260	HVDILGPLSAQTGIA			13	1491.82	Mpro+PPACK	5	210407_M_P_300sec_02	2	5.50331	225773	748.752
MPro	246	260	HVDILGPLSAQTGIA			13	1491.82	Mpro+PPACK	5	210407_M_P_300sec_03	2	5.501	184917	748.669
MPro	246	260	HVDILGPLSAQTGIA			13	1491.82	Mpro+PPACK	30	210407_M_P_1800sec_01	2	5.49246	191299	749.669
MPro	246	260	HVDILGPLSAQTGIA			13	1491.82	Mpro+PPACK	30	210407_M_P_1800sec_02	2	5.49792	105915	749.72
MPro	246	260	HVDILGPLSAQTGIA			13	1491.82	Mpro+PPACK	30	210407_M_P_1800sec_03	2	5.50098	142150	749.581
MPro	246	260	HVDILGPLSAQTGIA			13	1491.82	Mpro+PPACK	120	210407_M_P_7200sec_01	2	5.49637	140647	749.938
MPro	246	260	HVDILGPLSAQTGIA			13	1491.82	Mpro+PPACK	120	210407_M_P_7200sec_02	2	5.49043	118162	749.986
MPro	246	260	HVDILGPLSAQTGIA			13	1491.82	Mpro+PPACK	120	210407_M_P_7200sec_03	2	5.50505	149629	749.961
MPro	246	258	HVDILGPLSAQTG			11	1307.7	Mpro	0	DE-2021-04-07 M m0 2	1	5.14929	35204	1308.23
MPro	246	258	HVDILGPLSAQTG			11	1307.7	Mpro	0	DE-2021-04-07 M m0 2	2	5.13899	404784	654.678
MPro	246	258	HVDILGPLSAQTG			11	1307.7	Mpro	0	DE-2021-04-07 M m0 3	1	5.14382	46347	1308.28
MPro	246	258	HVDILGPLSAQTG			11	1307.7	Mpro	0	DE-2021-04-07 M m0 3	2	5.14022	578043	654.681
MPro	246	258	HVDILGPLSAQTG			11	1307.7	Mpro	0	DE-2021-04-07 M m0 4	1	5.14882	56239	1308.26
MPro	246	258	HVDILGPLSAQTG			11	1307.7	Mpro	0	DE-2021-04-07 M m0 4	2	5.13687	729059	654.689
MPro	246	258	HVDILGPLSAQTG			11	1307.7	Mpro	0.25	210407_M_15sec_01	1	5.15692	64948	1309.1
MPro	246	258	HVDILGPLSAQTG			11	1307.7	Mpro	0.25	210407_M_15sec_01	2	5.14403	746101	655.063
MPro	246	258	HVDILGPLSAQTG			11	1307.7	Mpro	0.25	210407_M_15sec_02	1	5.16944	62517	1309.16
MPro	246	258	HVDILGPLSAQTG			11	1307.7	Mpro	0.25	210407_M_15sec_02	2	5.15513	739483	655.087
MPro	246	258	HVDILGPLSAQTG			11	1307.7	Mpro	0.25	210407_M_15sec_03	1	5.16103	46278	1309.09
MPro	246	258	HVDILGPLSAQTG			11	1307.7	Mpro	0.25	210407_M_15sec_03	2	5.14787	574301	655.083
MPro	246	258	HVDILGPLSAQTG			11	1307.7	Mpro	1	210407_M_60sec_01	1	5.162	73272	1309.75
MPro	246	258	HVDILGPLSAQTG			11	1307.7	Mpro	1	210407_M_60sec_01	2	5.14696	790529	655.336
MPro	246	258	HVDILGPLSAQTG			11	1307.7	Mpro	1	210407_M_60sec_02	1	5.16622	104854	1309.85
MPro	246	258	HVDILGPLSAQTG			11	1307.7	Mpro	1	210407_M_60sec_02	2	5.14826	1083471	655.359
MPro	246	258	HVDILGPLSAQTG			11	1307.7	Mpro	1	210407_M_60sec_03	1	5.16162	115031	1309.86
MPro	246	258	HVDILGPLSAQTG			11	1307.7	Mpro	1	210407_M_60sec_03	2	5.14469	1113485	655.346
MPro	246	258	HVDILGPLSAQTG			11	1307.7	Mpro	5	210407_M_300sec_01	1	5.15208	61669	1311.15
MPro	246	258	HVDILGPLSAQTG			11	1307.7	Mpro	5	210407_M_300sec_01	2	5.14304	862883	655.911
MPro	246	258	HVDILGPLSAQTG			11	1307.7	Mpro	5	210407_M_300sec_02	1	5.16146	88578	1310.69
MPro	246	258	HVDILGPLSAQTG			11	1307.7	Mpro	5	210407_M_300sec_02	2	5.14344	881400	655.907
MPro	246	258	HVDILGPLSAQTG			11	1307.7	Mpro	5	210407_M_300sec_03	1	5.16025	75741	1311.12
MPro	246	258	HVDILGPLSAQTG			11	1307.7	Mpro	5	210407_M_300sec_03	2	5.14869	873452	655.899
MPro	246	258	HVDILGPLSAQTG			11	1307.7	Mpro	5	210407_M_300sec_03	3	5.16553	12283	436.736
MPro	246	258	HVDILGPLSAQTG			11	1307.7	Mpro	30	210407_M_1800sec_01	1	5.13886	50124	1313.19
MPro	246	258	HVDILGPLSAQTG			11	1307.7	Mpro	30	210407_M_1800sec_01	2	5.12616	570032	657.199
MPro	246	258	HVDILGPLSAQTG			11	1307.7	Mpro	30	210407_M_1800sec_02	1	5.13344	33881	1313.56
MPro	246	258	HVDILGPLSAQTG			11	1307.7	Mpro	30	210407_M_1800sec_02	2	5.12727	587648	657.204
MPro	246	258	HVDILGPLSAQTG			11	1307.7	Mpro	30	210407_M_1800sec_03	1	5.13535	46077	1313.09
MPro	246	258	HVDILGPLSAQTG			11	1307.7	Mpro	30	210407_M_1800sec_03	2	5.12452	605550	657.192
MPro	246	258	HVDILGPLSAQTG			11	1307.7	Mpro	120	210407_M_7200sec_01	1	5.13817	51407	1313.42
MPro	246	258	HVDILGPLSAQTG			11	1307.7	Mpro	120	210407_M_7200sec_01	2	5.12826	611350	657.325
MPro	246	258	HVDILGPLSAQTG			11	1307.7	Mpro	120	210407_M_7200sec_02	1	5.12904	40346	1313.8
MPro	246	258	HVDILGPLSAQTG			11	1307.7	Mpro	120	210407_M_7200sec_02	2	5.12404	610511	657.338
MPro	246	258	HVDILGPLSAQTG			11	1307.7	Mpro	120	210407_M_7200sec_03	1	5.12799	15670	1313.62
MPro	246	258	HVDILGPLSAQTG			11	1307.7	Mpro	120	210407_M_7200sec_03	2	5.12491	252122	657.278
MPro	246	258	HVDILGPLSAQTG			11	1307.7	Mpro+PPACK	0	DE-2021-04-07 M m0 2	1	5.14929	35204	1308.23
MPro	246	258	HVDILGPLSAQTG			11	1307.7	Mpro+PPACK	0	DE-2021-04-07 M m0 2	2	5.13899	404784	654.678
MPro	246	258	HVDILGPLSAQTG			11	1307.7	Mpro+PPACK	0	DE-2021-04-07 M m0 3	1	5.14382	46347	1308.28
MPro	246	258	HVDILGPLSAQTG			11	1307.7	Mpro+PPACK	0	DE-2021-04-07 M m0 3	2	5.14022	578043	654.681
MPro	246	258	HVDILGPLSAQTG			11	1307.7	Mpro+PPACK	0	DE-2021-04-07 M m0 4	1	5.14882	56239	1308.26
MPro	246	258	HVDILGPLSAQTG			11	1307.7	Mpro+PPACK	0	DE-2021-04-07 M m0 4	2	5.13687	729059	654.689
MPro	246	258	HVDILGPLSAQTG			11	1307.7	Mpro+PPACK	0.25	210407_M_P_15sec_01	1	5.15509	45303	1309.18
MPro	246	258	HVDILGPLSAQTG			11	1307.7	Mpro+PPACK	0.25	210407_M_P_15sec_01	2	5.14789	484193	655.106
MPro	246	258	HVDILGPLSAQTG			11	1307.7	Mpro+PPACK	0.25	210407_M_P_15sec_02	1	5.16002	48756	1309.42
MPro	246	258	HVDILGPLSAQTG			11	1307.7	Mpro+PPACK	0.25	210407_M_P_15sec_02	2	5.14817	484788	655.142
MPro	246	258	HVDILGPLSAQTG			11	1307.7	Mpro+PPACK	0.25	210407_M_P_15sec_03	1	5.15697	35958	1309.09
MPro	246	258	HVDILGPLSAQTG			11	1307.7	Mpro+PPACK	0.25	210407_M_P_15sec_03	2	5.14756	453937	655.141
MPro	246	258	HVDILGPLSAQTG			11	1307.7	Mpro+PPACK	1	210407_M_P_60sec_01	1	5.16075	13899	1309.71
MPro	246	258	HVDILGPLSAQTG			11	1307.7	Mpro+PPACK	1	210407_M_P_60sec_01	2	5.15682	251297	655.416
MPro	246	258	HVDILGPLSAQTG			11	1307.7	Mpro+PPACK	1	210407_M_P_60sec_02	1	5.15983	46502	1309.71
MPro	246	258	HVDILGPLSAQTG			11	1307.7	Mpro+PPACK	1	210407_M_P_60sec_02	2	5.15004	461239	655.44
MPro	246	258	HVDILGPLSAQTG			11	1307.7	Mpro+PPACK	1	210407_M_P_60sec_03	1	5.15892	33252	1309.79
MPro	246	258	HVDILGPLSAQTG			11	1307.7	Mpro+PPACK	1	210407_M_P_60sec_03	2	5.15206	402727	655.414
MPro	246	258	HVDILGPLSAQTG			11	1307.7	Mpro+PPACK	5	210407_M_P_300sec_01	1	5.15613	28883	1310.46
MPro	246	258	HVDILGPLSAQTG			11	1307.7	Mpro+PPACK	5	210407_M_P_300sec_01	2	5.14924	323313	655.771
MPro	246	258	HVDILGPLSAQTG			11	1307.7	Mpro+PPACK	5	210407_M_P_300sec_02	1	5.16372	41306	1310.69
MPro	246	258	HVDILGPLSAQTG			11	1307.7	Mpro+PPACK	5	210407_M_P_300sec_02	2	5.15064	429722	656.004
MPro	246	258	HVDILGPLSAQTG			11	1307.7	Mpro+PPACK	5	210407_M_P_300sec_03	1	5.16061	40822	1310.34
MPro	246	258	HVDILGPLSAQTG			11	1307.7	Mpro+PPACK	5	210407_M_P_300sec_03	2	5.15135	424935	655.85
MPro	246	258	HVDILGPLSAQTG			11	1307.7	Mpro+PPACK	30	210407_M_P_1800sec_01	2	5.13529	311241	657.019
MPro	246	258	HVDILGPLSAQTG			11	1307.7	Mpro+PPACK	30	210407_M_P_1800sec_02	2	5.13857	169509	656.934
MPro	246	258	HVDILGPLSAQTG			11	1307.7	Mpro+PPACK	30	210407_M_P_1800sec_03	2	5.12946	195635	657.235
MPro	246	258	HVDILGPLSAQTG			11	1307.7	Mpro+PPACK	120	210407_M_P_7200sec_01	2	5.13914	249586	657.109
MPro	246	258	HVDILGPLSAQTG			11	1307.7	Mpro+PPACK	120	210407_M_P_7200sec_02	2	5.1336	225448	657.125
MPro	246	258	HVDILGPLSAQTG			11	1307.7	Mpro+PPACK	120	210407_M_P_7200sec_03	2	5.14291	226497	657.134
MPro	235	245	MKYNYEPLTQD			9	1401.64	Mpro	0	DE-2021-04-07 M m0 2	2	4.50513	258179	701.748
MPro	235	245	MKYNYEPLTQD			9	1401.64	Mpro	0	DE-2021-04-07 M m0 2	3	4.50471	22634	468.052
MPro	235	245	MKYNYEPLTQD			9	1401.64	Mpro	0	DE-2021-04-07 M m0 3	2	4.50135	355151	701.71
MPro	235	245	MKYNYEPLTQD			9	1401.64	Mpro	0	DE-2021-04-07 M m0 3	3	4.50323	33001	468.127
MPro	235	245	MKYNYEPLTQD			9	1401.64	Mpro	0	DE-2021-04-07 M m0 4	2	4.497	467140	701.739
MPro	235	245	MKYNYEPLTQD			9	1401.64	Mpro	0	DE-2021-04-07 M m0 4	3	4.49709	35918	468.109
MPro	235	245	MKYNYEPLTQD			9	1401.64	Mpro	0.25	210407_M_15sec_01	2	4.49522	358545	702.669
MPro	235	245	MKYNYEPLTQD			9	1401.64	Mpro	0.25	210407_M_15sec_01	3	4.49486	35190	468.391
MPro	235	245	MKYNYEPLTQD			9	1401.64	Mpro	0.25	210407_M_15sec_02	2	4.50294	349812	702.66
MPro	235	245	MKYNYEPLTQD			9	1401.64	Mpro	0.25	210407_M_15sec_02	3	4.50166	31266	468.467
MPro	235	245	MKYNYEPLTQD			9	1401.64	Mpro	0.25	210407_M_15sec_03	2	4.50143	254408	702.618
MPro	235	245	MKYNYEPLTQD			9	1401.64	Mpro	0.25	210407_M_15sec_03	3	4.49723	16328	468.366
MPro	235	245	MKYNYEPLTQD			9	1401.64	Mpro	1	210407_M_60sec_01	2	4.49552	376320	702.683
MPro	235	245	MKYNYEPLTQD			9	1401.64	Mpro	1	210407_M_60sec_01	3	4.49173	27723	468.513
MPro	235	245	MKYNYEPLTQD			9	1401.64	Mpro	1	210407_M_60sec_02	2	4.49769	491627	702.679
MPro	235	245	MKYNYEPLTQD			9	1401.64	Mpro	1	210407_M_60sec_02	3	4.49792	43219	468.617
MPro	235	245	MKYNYEPLTQD			9	1401.64	Mpro	1	210407_M_60sec_03	2	4.49374	498549	702.684
MPro	235	245	MKYNYEPLTQD			9	1401.64	Mpro	1	210407_M_60sec_03	3	4.49309	40889	468.595
MPro	235	245	MKYNYEPLTQD			9	1401.64	Mpro	5	210407_M_300sec_01	2	4.49421	425816	702.614
MPro	235	245	MKYNYEPLTQD			9	1401.64	Mpro	5	210407_M_300sec_01	3	4.49319	39632	468.405
MPro	235	245	MKYNYEPLTQD			9	1401.64	Mpro	5	210407_M_300sec_02	2	4.49192	434348	702.605
MPro	235	245	MKYNYEPLTQD			9	1401.64	Mpro	5	210407_M_300sec_02	3	4.49483	37736	468.52
MPro	235	245	MKYNYEPLTQD			9	1401.64	Mpro	5	210407_M_300sec_03	2	4.4973	461397	702.611
MPro	235	245	MKYNYEPLTQD			9	1401.64	Mpro	5	210407_M_300sec_03	3	4.49434	40625	468.615
MPro	235	245	MKYNYEPLTQD			9	1401.64	Mpro	30	210407_M_1800sec_01	2	4.4906	398136	702.81
MPro	235	245	MKYNYEPLTQD			9	1401.64	Mpro	30	210407_M_1800sec_01	3	4.49067	33940	468.524
MPro	235	245	MKYNYEPLTQD			9	1401.64	Mpro	30	210407_M_1800sec_02	2	4.49203	415109	702.768
MPro	235	245	MKYNYEPLTQD			9	1401.64	Mpro	30	210407_M_1800sec_02	3	4.49026	34020	468.541
MPro	235	245	MKYNYEPLTQD			9	1401.64	Mpro	30	210407_M_1800sec_03	2	4.49075	428382	702.799
MPro	235	245	MKYNYEPLTQD			9	1401.64	Mpro	30	210407_M_1800sec_03	3	4.49241	35656	468.543
MPro	235	245	MKYNYEPLTQD			9	1401.64	Mpro	120	210407_M_7200sec_01	2	4.49334	390187	703.01
MPro	235	245	MKYNYEPLTQD			9	1401.64	Mpro	120	210407_M_7200sec_01	3	4.49657	31052	468.567
MPro	235	245	MKYNYEPLTQD			9	1401.64	Mpro	120	210407_M_7200sec_02	2	4.48722	390840	703.021
MPro	235	245	MKYNYEPLTQD			9	1401.64	Mpro	120	210407_M_7200sec_02	3	4.48639	38243	468.671
MPro	235	245	MKYNYEPLTQD			9	1401.64	Mpro	120	210407_M_7200sec_03	2	4.49079	185423	702.912
MPro	235	245	MKYNYEPLTQD			9	1401.64	Mpro	120	210407_M_7200sec_03	3	4.48628	12764	468.705
MPro	235	245	MKYNYEPLTQD			9	1401.64	Mpro+PPACK	0	DE-2021-04-07 M m0 2	2	4.50513	258179	701.748
MPro	235	245	MKYNYEPLTQD			9	1401.64	Mpro+PPACK	0	DE-2021-04-07 M m0 2	3	4.50471	22634	468.052
MPro	235	245	MKYNYEPLTQD			9	1401.64	Mpro+PPACK	0	DE-2021-04-07 M m0 3	2	4.50135	355151	701.71
MPro	235	245	MKYNYEPLTQD			9	1401.64	Mpro+PPACK	0	DE-2021-04-07 M m0 3	3	4.50323	33001	468.127
MPro	235	245	MKYNYEPLTQD			9	1401.64	Mpro+PPACK	0	DE-2021-04-07 M m0 4	2	4.497	467140	701.739
MPro	235	245	MKYNYEPLTQD			9	1401.64	Mpro+PPACK	0	DE-2021-04-07 M m0 4	3	4.49709	35918	468.109
MPro	235	245	MKYNYEPLTQD			9	1401.64	Mpro+PPACK	0.25	210407_M_P_15sec_01	2	4.49298	203142	702.624
MPro	235	245	MKYNYEPLTQD			9	1401.64	Mpro+PPACK	0.25	210407_M_P_15sec_02	2	4.49381	192670	702.614
MPro	235	245	MKYNYEPLTQD			9	1401.64	Mpro+PPACK	0.25	210407_M_P_15sec_03	2	4.49337	196939	702.641
MPro	235	245	MKYNYEPLTQD			9	1401.64	Mpro+PPACK	1	210407_M_P_60sec_01	2	4.49278	87183	702.519
MPro	235	245	MKYNYEPLTQD			9	1401.64	Mpro+PPACK	1	210407_M_P_60sec_02	2	4.49025	191742	702.688
MPro	235	245	MKYNYEPLTQD			9	1401.64	Mpro+PPACK	1	210407_M_P_60sec_02	3	4.49096	12751	468.361
MPro	235	245	MKYNYEPLTQD			9	1401.64	Mpro+PPACK	1	210407_M_P_60sec_03	2	4.49281	155160	702.667
MPro	235	245	MKYNYEPLTQD			9	1401.64	Mpro+PPACK	5	210407_M_P_300sec_02	2	4.4907	193264	702.639
MPro	235	245	MKYNYEPLTQD			9	1401.64	Mpro+PPACK	5	210407_M_P_300sec_03	2	4.48912	166797	702.653
MPro	235	245	MKYNYEPLTQD			9	1401.64	Mpro+PPACK	5	210407_M_P_300sec_03	3	4.48549	11224	468.391
MPro	235	245	MKYNYEPLTQD			9	1401.64	Mpro+PPACK	30	210407_M_P_1800sec_01	2	4.48492	167075	702.79
MPro	235	245	MKYNYEPLTQD			9	1401.64	Mpro+PPACK	30	210407_M_P_1800sec_01	3	4.48327	11195	468.375
MPro	235	245	MKYNYEPLTQD			9	1401.64	Mpro+PPACK	30	210407_M_P_1800sec_02	2	4.49117	100299	702.751
MPro	235	245	MKYNYEPLTQD			9	1401.64	Mpro+PPACK	30	210407_M_P_1800sec_03	2	4.49177	129405	702.77
MPro	235	245	MKYNYEPLTQD			9	1401.64	Mpro+PPACK	120	210407_M_P_7200sec_01	2	4.48897	134812	702.905
MPro	235	245	MKYNYEPLTQD			9	1401.64	Mpro+PPACK	120	210407_M_P_7200sec_02	2	4.48302	126634	702.86
MPro	235	245	MKYNYEPLTQD			9	1401.64	Mpro+PPACK	120	210407_M_P_7200sec_03	2	4.48742	129038	702.957
MPro	238	245	NYEPLTQD			6	979.437	Mpro	0	DE-2021-04-07 M m0 2	2	4.21753	64082	490.515
MPro	238	245	NYEPLTQD			6	979.437	Mpro	0	DE-2021-04-07 M m0 3	2	4.21565	90418	490.465
MPro	238	245	NYEPLTQD			6	979.437	Mpro	0	DE-2021-04-07 M m0 4	2	4.20633	109610	490.474
MPro	238	245	NYEPLTQD			6	979.437	Mpro	0.25	210407_M_15sec_01	2	4.2053	97304	490.796
MPro	238	245	NYEPLTQD			6	979.437	Mpro	0.25	210407_M_15sec_02	2	4.21647	89501	490.81
MPro	238	245	NYEPLTQD			6	979.437	Mpro	0.25	210407_M_15sec_03	2	4.20995	80897	490.792
MPro	238	245	NYEPLTQD			6	979.437	Mpro	1	210407_M_60sec_01	2	4.20198	88160	490.782
MPro	238	245	NYEPLTQD			6	979.437	Mpro	1	210407_M_60sec_02	2	4.21034	113434	490.779
MPro	238	245	NYEPLTQD			6	979.437	Mpro	1	210407_M_60sec_03	2	4.20405	133883	490.811
MPro	238	245	NYEPLTQD			6	979.437	Mpro	5	210407_M_300sec_01	2	4.20243	114544	490.791
MPro	238	245	NYEPLTQD			6	979.437	Mpro	5	210407_M_300sec_02	2	4.20301	117548	490.803
MPro	238	245	NYEPLTQD			6	979.437	Mpro	5	210407_M_300sec_03	2	4.2097	117406	490.809
MPro	238	245	NYEPLTQD			6	979.437	Mpro	30	210407_M_1800sec_01	2	4.20353	109542	490.824
MPro	238	245	NYEPLTQD			6	979.437	Mpro	30	210407_M_1800sec_02	2	4.20001	121295	490.847
MPro	238	245	NYEPLTQD			6	979.437	Mpro	30	210407_M_1800sec_03	2	4.20274	113325	490.838
MPro	238	245	NYEPLTQD			6	979.437	Mpro	120	210407_M_7200sec_01	2	4.2038	115494	490.95
MPro	238	245	NYEPLTQD			6	979.437	Mpro	120	210407_M_7200sec_02	2	4.20002	105100	490.928
MPro	238	245	NYEPLTQD			6	979.437	Mpro	120	210407_M_7200sec_03	2	4.20207	50536	490.919
MPro	238	245	NYEPLTQD			6	979.437	Mpro+PPACK	0	DE-2021-04-07 M m0 2	2	4.21753	64082	490.515
MPro	238	245	NYEPLTQD			6	979.437	Mpro+PPACK	0	DE-2021-04-07 M m0 3	2	4.21565	90418	490.465
MPro	238	245	NYEPLTQD			6	979.437	Mpro+PPACK	0	DE-2021-04-07 M m0 4	2	4.20633	109610	490.474
MPro	238	245	NYEPLTQD			6	979.437	Mpro+PPACK	0.25	210407_M_P_15sec_01	2	4.20623	63044	490.829
MPro	238	245	NYEPLTQD			6	979.437	Mpro+PPACK	0.25	210407_M_P_15sec_02	2	4.20312	59810	490.817
MPro	238	245	NYEPLTQD			6	979.437	Mpro+PPACK	0.25	210407_M_P_15sec_03	2	4.20771	59032	490.813
MPro	238	245	NYEPLTQD			6	979.437	Mpro+PPACK	1	210407_M_P_60sec_01	2	4.20518	26439	490.682
MPro	238	245	NYEPLTQD			6	979.437	Mpro+PPACK	1	210407_M_P_60sec_02	2	4.20598	67965	490.781
MPro	238	245	NYEPLTQD			6	979.437	Mpro+PPACK	1	210407_M_P_60sec_03	2	4.20859	45086	490.661
MPro	238	245	NYEPLTQD			6	979.437	Mpro+PPACK	5	210407_M_P_300sec_01	2	4.20154	40651	490.664
MPro	238	245	NYEPLTQD			6	979.437	Mpro+PPACK	5	210407_M_P_300sec_02	2	4.20378	62987	490.804
MPro	238	245	NYEPLTQD			6	979.437	Mpro+PPACK	5	210407_M_P_300sec_03	2	4.20187	57047	490.751
MPro	238	245	NYEPLTQD			6	979.437	Mpro+PPACK	30	210407_M_P_1800sec_01	2	4.19874	55988	490.814
MPro	238	245	NYEPLTQD			6	979.437	Mpro+PPACK	30	210407_M_P_1800sec_02	2	4.2048	30282	490.73
MPro	238	245	NYEPLTQD			6	979.437	Mpro+PPACK	30	210407_M_P_1800sec_03	2	4.2063	34901	490.71
MPro	238	245	NYEPLTQD			6	979.437	Mpro+PPACK	120	210407_M_P_7200sec_01	2	4.19835	39122	490.865
MPro	238	245	NYEPLTQD			6	979.437	Mpro+PPACK	120	210407_M_P_7200sec_02	2	4.19662	26787	490.733
MPro	238	245	NYEPLTQD			6	979.437	Mpro+PPACK	120	210407_M_P_7200sec_03	2	4.19723	38268	490.886
MPro	233	245	VAMKYNYEPLTQD			11	1571.74	Mpro	0	DE-2021-04-07 M m0 2	2	4.61327	352742	786.837
MPro	233	245	VAMKYNYEPLTQD			11	1571.74	Mpro	0	DE-2021-04-07 M m0 3	2	4.60892	498172	786.838
MPro	233	245	VAMKYNYEPLTQD			11	1571.74	Mpro	0	DE-2021-04-07 M m0 4	2	4.60562	656463	786.837
MPro	233	245	VAMKYNYEPLTQD			11	1571.74	Mpro	0.25	210407_M_15sec_01	2	4.60698	529359	788.004
MPro	233	245	VAMKYNYEPLTQD			11	1571.74	Mpro	0.25	210407_M_15sec_02	2	4.61309	554419	788.001
MPro	233	245	VAMKYNYEPLTQD			11	1571.74	Mpro	0.25	210407_M_15sec_03	2	4.60265	404599	787.985
MPro	233	245	VAMKYNYEPLTQD			11	1571.74	Mpro	1	210407_M_60sec_01	2	4.60134	586044	788.267
MPro	233	245	VAMKYNYEPLTQD			11	1571.74	Mpro	1	210407_M_60sec_02	2	4.60416	761851	788.251
MPro	233	245	VAMKYNYEPLTQD			11	1571.74	Mpro	1	210407_M_60sec_03	2	4.60284	787704	788.264
MPro	233	245	VAMKYNYEPLTQD			11	1571.74	Mpro	5	210407_M_300sec_01	2	4.60359	668131	788.407
MPro	233	245	VAMKYNYEPLTQD			11	1571.74	Mpro	5	210407_M_300sec_02	2	4.60005	679952	788.467
MPro	233	245	VAMKYNYEPLTQD			11	1571.74	Mpro	5	210407_M_300sec_03	2	4.60815	650173	788.453
MPro	233	245	VAMKYNYEPLTQD			11	1571.74	Mpro	30	210407_M_1800sec_01	2	4.59691	619755	788.604
MPro	233	245	VAMKYNYEPLTQD			11	1571.74	Mpro	30	210407_M_1800sec_02	2	4.59968	659144	788.631
MPro	233	245	VAMKYNYEPLTQD			11	1571.74	Mpro	30	210407_M_1800sec_03	2	4.60077	656091	788.658
MPro	233	245	VAMKYNYEPLTQD			11	1571.74	Mpro	120	210407_M_7200sec_01	2	4.60029	608257	788.891
MPro	233	245	VAMKYNYEPLTQD			11	1571.74	Mpro	120	210407_M_7200sec_02	2	4.59825	624858	788.884
MPro	233	245	VAMKYNYEPLTQD			11	1571.74	Mpro	120	210407_M_7200sec_03	2	4.59657	301281	788.777
MPro	233	245	VAMKYNYEPLTQD			11	1571.74	Mpro+PPACK	0	DE-2021-04-07 M m0 2	2	4.61327	352742	786.837
MPro	233	245	VAMKYNYEPLTQD			11	1571.74	Mpro+PPACK	0	DE-2021-04-07 M m0 3	2	4.60892	498172	786.838
MPro	233	245	VAMKYNYEPLTQD			11	1571.74	Mpro+PPACK	0	DE-2021-04-07 M m0 4	2	4.60562	656463	786.837
MPro	233	245	VAMKYNYEPLTQD			11	1571.74	Mpro+PPACK	0.25	210407_M_P_15sec_01	2	4.60669	335672	787.972
MPro	233	245	VAMKYNYEPLTQD			11	1571.74	Mpro+PPACK	0.25	210407_M_P_15sec_02	2	4.60898	321376	788.026
MPro	233	245	VAMKYNYEPLTQD			11	1571.74	Mpro+PPACK	0.25	210407_M_P_15sec_03	2	4.60757	295849	787.972
MPro	233	245	VAMKYNYEPLTQD			11	1571.74	Mpro+PPACK	1	210407_M_P_60sec_01	2	4.60933	161692	788.135
MPro	233	245	VAMKYNYEPLTQD			11	1571.74	Mpro+PPACK	1	210407_M_P_60sec_02	2	4.60911	317080	788.285
MPro	233	245	VAMKYNYEPLTQD			11	1571.74	Mpro+PPACK	1	210407_M_P_60sec_03	2	4.6125	244193	788.297
MPro	233	245	VAMKYNYEPLTQD			11	1571.74	Mpro+PPACK	5	210407_M_P_300sec_01	2	4.6021	198962	788.16
MPro	233	245	VAMKYNYEPLTQD			11	1571.74	Mpro+PPACK	5	210407_M_P_300sec_02	2	4.60846	316092	788.433
MPro	233	245	VAMKYNYEPLTQD			11	1571.74	Mpro+PPACK	5	210407_M_P_300sec_03	2	4.60684	272788	788.412
MPro	233	245	VAMKYNYEPLTQD			11	1571.74	Mpro+PPACK	30	210407_M_P_1800sec_01	2	4.60301	277934	788.609
MPro	233	245	VAMKYNYEPLTQD			11	1571.74	Mpro+PPACK	30	210407_M_P_1800sec_02	2	4.60793	157359	788.512
MPro	233	245	VAMKYNYEPLTQD			11	1571.74	Mpro+PPACK	30	210407_M_P_1800sec_03	2	4.60701	197239	788.55
MPro	233	245	VAMKYNYEPLTQD			11	1571.74	Mpro+PPACK	120	210407_M_P_7200sec_01	2	4.60568	200427	788.949
MPro	233	245	VAMKYNYEPLTQD			11	1571.74	Mpro+PPACK	120	210407_M_P_7200sec_02	2	4.60729	163558	788.736
MPro	233	245	VAMKYNYEPLTQD			11	1571.74	Mpro+PPACK	120	210407_M_P_7200sec_03	2	4.60334	213228	788.799
MPro	230	234	FNLVA			4	563.319	Mpro	0	DE-2021-04-07 M m0 2	1	5.18564	56424	563.529
MPro	230	234	FNLVA			4	563.319	Mpro	0	DE-2021-04-07 M m0 3	1	5.18459	78864	563.561
MPro	230	234	FNLVA			4	563.319	Mpro	0	DE-2021-04-07 M m0 4	1	5.18274	103979	563.529
MPro	230	234	FNLVA			4	563.319	Mpro	0.25	210407_M_15sec_01	1	5.18397	84293	563.567
MPro	230	234	FNLVA			4	563.319	Mpro	0.25	210407_M_15sec_02	1	5.19258	84973	563.581
MPro	230	234	FNLVA			4	563.319	Mpro	0.25	210407_M_15sec_03	1	5.18499	59284	563.571
MPro	230	234	FNLVA			4	563.319	Mpro	1	210407_M_60sec_01	1	5.17993	92819	563.72
MPro	230	234	FNLVA			4	563.319	Mpro	1	210407_M_60sec_02	1	5.18377	133583	563.665
MPro	230	234	FNLVA			4	563.319	Mpro	1	210407_M_60sec_03	1	5.17856	136854	563.689
MPro	230	234	FNLVA			4	563.319	Mpro	5	210407_M_300sec_01	1	5.18078	108848	563.755
MPro	230	234	FNLVA			4	563.319	Mpro	5	210407_M_300sec_02	1	5.18004	103797	563.639
MPro	230	234	FNLVA			4	563.319	Mpro	5	210407_M_300sec_03	1	5.18484	116174	563.778
MPro	230	234	FNLVA			4	563.319	Mpro	30	210407_M_1800sec_01	1	5.17923	92499	564.158
MPro	230	234	FNLVA			4	563.319	Mpro	30	210407_M_1800sec_02	1	5.17854	95737	564.182
MPro	230	234	FNLVA			4	563.319	Mpro	30	210407_M_1800sec_03	1	5.17786	106618	564.262
MPro	230	234	FNLVA			4	563.319	Mpro	120	210407_M_7200sec_01	1	5.17921	85073	564.598
MPro	230	234	FNLVA			4	563.319	Mpro	120	210407_M_7200sec_02	1	5.1755	95947	564.849
MPro	230	234	FNLVA			4	563.319	Mpro	120	210407_M_7200sec_03	1	5.17676	46726	564.813
MPro	230	234	FNLVA			4	563.319	Mpro+PPACK	0	DE-2021-04-07 M m0 2	1	5.18564	56424	563.529
MPro	230	234	FNLVA			4	563.319	Mpro+PPACK	0	DE-2021-04-07 M m0 3	1	5.18459	78864	563.561
MPro	230	234	FNLVA			4	563.319	Mpro+PPACK	0	DE-2021-04-07 M m0 4	1	5.18274	103979	563.529
MPro	230	234	FNLVA			4	563.319	Mpro+PPACK	0.25	210407_M_P_15sec_01	1	5.1839	54782	563.581
MPro	230	234	FNLVA			4	563.319	Mpro+PPACK	0.25	210407_M_P_15sec_02	1	5.18393	56344	563.582
MPro	230	234	FNLVA			4	563.319	Mpro+PPACK	0.25	210407_M_P_15sec_03	1	5.18257	50618	563.606
MPro	230	234	FNLVA			4	563.319	Mpro+PPACK	1	210407_M_P_60sec_01	1	5.18639	20985	563.635
MPro	230	234	FNLVA			4	563.319	Mpro+PPACK	1	210407_M_P_60sec_02	1	5.18422	56693	563.648
MPro	230	234	FNLVA			4	563.319	Mpro+PPACK	1	210407_M_P_60sec_03	1	5.18526	43421	563.592
MPro	230	234	FNLVA			4	563.319	Mpro+PPACK	5	210407_M_P_300sec_01	1	5.17776	33673	563.643
MPro	230	234	FNLVA			4	563.319	Mpro+PPACK	5	210407_M_P_300sec_02	1	5.18408	51586	563.673
MPro	230	234	FNLVA			4	563.319	Mpro+PPACK	5	210407_M_P_300sec_03	1	5.18124	46245	563.678
MPro	230	234	FNLVA			4	563.319	Mpro+PPACK	30	210407_M_P_1800sec_01	1	5.1763	47685	564.184
MPro	230	234	FNLVA			4	563.319	Mpro+PPACK	30	210407_M_P_1800sec_03	1	5.18572	35587	564.208
MPro	230	234	FNLVA			4	563.319	Mpro+PPACK	120	210407_M_P_7200sec_01	1	5.18037	32495	564.54
MPro	230	234	FNLVA			4	563.319	Mpro+PPACK	120	210407_M_P_7200sec_02	1	5.17603	33224	564.563
MPro	230	234	FNLVA			4	563.319	Mpro+PPACK	120	210407_M_P_7200sec_03	1	5.18205	30808	564.769
MPro	228	232	NDFNL			4	622.283	Mpro	0	DE-2021-04-07 M m0 2	1	5.24344	90370	622.521
MPro	228	232	NDFNL			4	622.283	Mpro	0	DE-2021-04-07 M m0 3	1	5.24015	117228	622.483
MPro	228	232	NDFNL			4	622.283	Mpro	0	DE-2021-04-07 M m0 4	1	5.2325	170275	622.559
MPro	228	232	NDFNL			4	622.283	Mpro	0.25	210407_M_15sec_01	1	5.23223	157376	622.66
MPro	228	232	NDFNL			4	622.283	Mpro	0.25	210407_M_15sec_02	1	5.24523	149831	622.655
MPro	228	232	NDFNL			4	622.283	Mpro	0.25	210407_M_15sec_03	1	5.23604	112817	622.67
MPro	228	232	NDFNL			4	622.283	Mpro	1	210407_M_60sec_01	1	5.23106	174874	622.681
MPro	228	232	NDFNL			4	622.283	Mpro	1	210407_M_60sec_02	1	5.23653	207624	622.694
MPro	228	232	NDFNL			4	622.283	Mpro	1	210407_M_60sec_03	1	5.233	234384	622.668
MPro	228	232	NDFNL			4	622.283	Mpro	5	210407_M_300sec_01	1	5.23214	180347	622.993
MPro	228	232	NDFNL			4	622.283	Mpro	5	210407_M_300sec_02	1	5.23196	192208	622.947
MPro	228	232	NDFNL			4	622.283	Mpro	5	210407_M_300sec_03	1	5.23675	189081	622.996
MPro	228	232	NDFNL			4	622.283	Mpro	30	210407_M_1800sec_01	1	5.23066	158244	623.844
MPro	228	232	NDFNL			4	622.283	Mpro	30	210407_M_1800sec_02	1	5.23103	168563	623.791
MPro	228	232	NDFNL			4	622.283	Mpro	30	210407_M_1800sec_03	1	5.22989	170349	623.832
MPro	228	232	NDFNL			4	622.283	Mpro	120	210407_M_7200sec_01	1	5.23525	145976	624.456
MPro	228	232	NDFNL			4	622.283	Mpro	120	210407_M_7200sec_02	1	5.23006	164165	624.466
MPro	228	232	NDFNL			4	622.283	Mpro	120	210407_M_7200sec_03	1	5.23137	60081	624.536
MPro	228	232	NDFNL			4	622.283	Mpro+PPACK	0	DE-2021-04-07 M m0 2	1	5.24344	90370	622.521
MPro	228	232	NDFNL			4	622.283	Mpro+PPACK	0	DE-2021-04-07 M m0 3	1	5.24015	117228	622.483
MPro	228	232	NDFNL			4	622.283	Mpro+PPACK	0	DE-2021-04-07 M m0 4	1	5.2325	170275	622.559
MPro	228	232	NDFNL			4	622.283	Mpro+PPACK	0.25	210407_M_P_15sec_01	1	5.23301	109299	622.71
MPro	228	232	NDFNL			4	622.283	Mpro+PPACK	0.25	210407_M_P_15sec_02	1	5.23607	95900	622.677
MPro	228	232	NDFNL			4	622.283	Mpro+PPACK	0.25	210407_M_P_15sec_03	1	5.23656	88027	622.659
MPro	228	232	NDFNL			4	622.283	Mpro+PPACK	1	210407_M_P_60sec_01	1	5.23871	42266	622.81
MPro	228	232	NDFNL			4	622.283	Mpro+PPACK	1	210407_M_P_60sec_02	1	5.23563	94060	622.749
MPro	228	232	NDFNL			4	622.283	Mpro+PPACK	1	210407_M_P_60sec_03	1	5.24319	77236	622.763
MPro	228	232	NDFNL			4	622.283	Mpro+PPACK	5	210407_M_P_300sec_01	1	5.23571	59453	622.949
MPro	228	232	NDFNL			4	622.283	Mpro+PPACK	5	210407_M_P_300sec_02	1	5.23614	97060	622.964
MPro	228	232	NDFNL			4	622.283	Mpro+PPACK	5	210407_M_P_300sec_03	1	5.23629	80027	622.95
MPro	228	232	NDFNL			4	622.283	Mpro+PPACK	30	210407_M_P_1800sec_01	1	5.2302	77355	623.839
MPro	228	232	NDFNL			4	622.283	Mpro+PPACK	30	210407_M_P_1800sec_02	1	5.23478	44086	623.781
MPro	228	232	NDFNL			4	622.283	Mpro+PPACK	30	210407_M_P_1800sec_03	1	5.24053	57518	623.893
MPro	228	232	NDFNL			4	622.283	Mpro+PPACK	120	210407_M_P_7200sec_01	1	5.23317	49368	624.506
MPro	228	232	NDFNL			4	622.283	Mpro+PPACK	120	210407_M_P_7200sec_02	1	5.23456	50215	624.496
MPro	228	232	NDFNL			4	622.283	Mpro+PPACK	120	210407_M_P_7200sec_03	1	5.23778	50067	624.445
MPro	219	227	FLNRFTTTL			8	1112.61	Mpro	0	DE-2021-04-07 M m0 2	2	5.3007	93151	557.1
MPro	219	227	FLNRFTTTL			8	1112.61	Mpro	0	DE-2021-04-07 M m0 3	2	5.29415	134458	557.098
MPro	219	227	FLNRFTTTL			8	1112.61	Mpro	0	DE-2021-04-07 M m0 4	2	5.29594	187522	557.117
MPro	219	227	FLNRFTTTL			8	1112.61	Mpro	0.25	210407_M_15sec_01	2	5.29499	126415	559.214
MPro	219	227	FLNRFTTTL			8	1112.61	Mpro	0.25	210407_M_15sec_02	2	5.30473	133187	559.167
MPro	219	227	FLNRFTTTL			8	1112.61	Mpro	0.25	210407_M_15sec_03	2	5.29686	85666	559.25
MPro	219	227	FLNRFTTTL			8	1112.61	Mpro	1	210407_M_60sec_01	2	5.28875	122997	559.493
MPro	219	227	FLNRFTTTL			8	1112.61	Mpro	1	210407_M_60sec_02	2	5.29066	186899	559.395
MPro	219	227	FLNRFTTTL			8	1112.61	Mpro	1	210407_M_60sec_03	2	5.29188	186414	559.497
MPro	219	227	FLNRFTTTL			8	1112.61	Mpro	5	210407_M_300sec_01	2	5.28767	156673	559.3
MPro	219	227	FLNRFTTTL			8	1112.61	Mpro	5	210407_M_300sec_02	2	5.28774	161924	559.31
MPro	219	227	FLNRFTTTL			8	1112.61	Mpro	5	210407_M_300sec_03	2	5.29155	169265	559.396
MPro	219	227	FLNRFTTTL			8	1112.61	Mpro	30	210407_M_1800sec_01	2	5.29017	159636	559.289
MPro	219	227	FLNRFTTTL			8	1112.61	Mpro	30	210407_M_1800sec_02	2	5.28593	153044	559.392
MPro	219	227	FLNRFTTTL			8	1112.61	Mpro	30	210407_M_1800sec_03	2	5.28673	166874	559.265
MPro	219	227	FLNRFTTTL			8	1112.61	Mpro	120	210407_M_7200sec_01	2	5.28684	152330	559.258
MPro	219	227	FLNRFTTTL			8	1112.61	Mpro	120	210407_M_7200sec_02	2	5.2856	160762	559.321
MPro	219	227	FLNRFTTTL			8	1112.61	Mpro	120	210407_M_7200sec_03	2	5.28303	74402	559.126
MPro	219	227	FLNRFTTTL			8	1112.61	Mpro+PPACK	0	DE-2021-04-07 M m0 2	2	5.3007	93151	557.1
MPro	219	227	FLNRFTTTL			8	1112.61	Mpro+PPACK	0	DE-2021-04-07 M m0 3	2	5.29415	134458	557.098
MPro	219	227	FLNRFTTTL			8	1112.61	Mpro+PPACK	0	DE-2021-04-07 M m0 4	2	5.29594	187522	557.117
MPro	219	227	FLNRFTTTL			8	1112.61	Mpro+PPACK	0.25	210407_M_P_15sec_01	2	5.29715	81334	559.158
MPro	219	227	FLNRFTTTL			8	1112.61	Mpro+PPACK	0.25	210407_M_P_15sec_02	2	5.29776	71067	559.351
MPro	219	227	FLNRFTTTL			8	1112.61	Mpro+PPACK	0.25	210407_M_P_15sec_03	2	5.29365	80598	559.182
MPro	219	227	FLNRFTTTL			8	1112.61	Mpro+PPACK	1	210407_M_P_60sec_01	2	5.29614	39064	559.374
MPro	219	227	FLNRFTTTL			8	1112.61	Mpro+PPACK	1	210407_M_P_60sec_02	2	5.28923	77651	559.52
MPro	219	227	FLNRFTTTL			8	1112.61	Mpro+PPACK	1	210407_M_P_60sec_03	2	5.29914	53875	559.445
MPro	219	227	FLNRFTTTL			8	1112.61	Mpro+PPACK	5	210407_M_P_300sec_02	2	5.29216	72704	559.302
MPro	219	227	FLNRFTTTL			8	1112.61	Mpro+PPACK	5	210407_M_P_300sec_03	2	5.29039	63059	559.326
MPro	219	227	FLNRFTTTL			8	1112.61	Mpro+PPACK	30	210407_M_P_1800sec_01	2	5.28711	56390	559.475
MPro	219	227	FLNRFTTTL			8	1112.61	Mpro+PPACK	30	210407_M_P_1800sec_02	2	5.29102	31617	559.097
MPro	219	227	FLNRFTTTL			8	1112.61	Mpro+PPACK	30	210407_M_P_1800sec_03	2	5.30012	45184	559.241
MPro	219	227	FLNRFTTTL			8	1112.61	Mpro+PPACK	120	210407_M_P_7200sec_01	2	5.29001	46949	559.212
MPro	219	227	FLNRFTTTL			8	1112.61	Mpro+PPACK	120	210407_M_P_7200sec_02	2	5.28859	45733	559.242
MPro	219	227	FLNRFTTTL			8	1112.61	Mpro+PPACK	120	210407_M_P_7200sec_03	2	5.29701	48715	559.279
MPro	211	218	AVINGDRW			7	930.479	Mpro	0	DE-2021-04-07 M m0 2	2	4.61253	110106	465.968
MPro	211	218	AVINGDRW			7	930.479	Mpro	0	DE-2021-04-07 M m0 3	2	4.60583	161190	465.996
MPro	211	218	AVINGDRW			7	930.479	Mpro	0	DE-2021-04-07 M m0 4	2	4.60225	210584	465.969
MPro	211	218	AVINGDRW			7	930.479	Mpro	0.25	210407_M_15sec_01	2	4.60286	157986	466.825
MPro	211	218	AVINGDRW			7	930.479	Mpro	0.25	210407_M_15sec_02	2	4.60983	158324	466.85
MPro	211	218	AVINGDRW			7	930.479	Mpro	0.25	210407_M_15sec_03	2	4.60309	114715	466.868
MPro	211	218	AVINGDRW			7	930.479	Mpro	1	210407_M_60sec_01	2	4.59865	176797	466.998
MPro	211	218	AVINGDRW			7	930.479	Mpro	1	210407_M_60sec_02	2	4.60187	227906	466.951
MPro	211	218	AVINGDRW			7	930.479	Mpro	1	210407_M_60sec_03	2	4.60058	223898	466.977
MPro	211	218	AVINGDRW			7	930.479	Mpro	5	210407_M_300sec_01	2	4.60194	189761	467.055
MPro	211	218	AVINGDRW			7	930.479	Mpro	5	210407_M_300sec_02	2	4.59862	207759	466.997
MPro	211	218	AVINGDRW			7	930.479	Mpro	5	210407_M_300sec_03	2	4.60606	194242	467.072
MPro	211	218	AVINGDRW			7	930.479	Mpro	30	210407_M_1800sec_01	2	4.59469	170291	467.189
MPro	211	218	AVINGDRW			7	930.479	Mpro	30	210407_M_1800sec_02	2	4.59429	191494	467.093
MPro	211	218	AVINGDRW			7	930.479	Mpro	30	210407_M_1800sec_03	2	4.59733	192002	467.137
MPro	211	218	AVINGDRW			7	930.479	Mpro	120	210407_M_7200sec_01	2	4.59721	181628	467.273
MPro	211	218	AVINGDRW			7	930.479	Mpro	120	210407_M_7200sec_02	2	4.59704	193145	467.223
MPro	211	218	AVINGDRW			7	930.479	Mpro	120	210407_M_7200sec_03	2	4.59695	87034	467.199
MPro	211	218	AVINGDRW			7	930.479	Mpro+PPACK	0	DE-2021-04-07 M m0 2	2	4.61253	110106	465.968
MPro	211	218	AVINGDRW			7	930.479	Mpro+PPACK	0	DE-2021-04-07 M m0 3	2	4.60583	161190	465.996
MPro	211	218	AVINGDRW			7	930.479	Mpro+PPACK	0	DE-2021-04-07 M m0 4	2	4.60225	210584	465.969
MPro	211	218	AVINGDRW			7	930.479	Mpro+PPACK	0.25	210407_M_P_15sec_01	2	4.60494	92971	466.94
MPro	211	218	AVINGDRW			7	930.479	Mpro+PPACK	0.25	210407_M_P_15sec_02	2	4.60729	78975	466.986
MPro	211	218	AVINGDRW			7	930.479	Mpro+PPACK	0.25	210407_M_P_15sec_03	2	4.60777	74396	466.973
MPro	211	218	AVINGDRW			7	930.479	Mpro+PPACK	1	210407_M_P_60sec_01	2	4.60811	37193	466.999
MPro	211	218	AVINGDRW			7	930.479	Mpro+PPACK	1	210407_M_P_60sec_02	2	4.6066	77329	467.198
MPro	211	218	AVINGDRW			7	930.479	Mpro+PPACK	1	210407_M_P_60sec_03	2	4.61164	65605	467.046
MPro	211	218	AVINGDRW			7	930.479	Mpro+PPACK	5	210407_M_P_300sec_01	2	4.60602	51595	467.033
MPro	211	218	AVINGDRW			7	930.479	Mpro+PPACK	5	210407_M_P_300sec_02	2	4.60774	88875	467.177
MPro	211	218	AVINGDRW			7	930.479	Mpro+PPACK	5	210407_M_P_300sec_03	2	4.60581	72420	467.136
MPro	211	218	AVINGDRW			7	930.479	Mpro+PPACK	30	210407_M_P_1800sec_01	2	4.60387	76502	467.251
MPro	211	218	AVINGDRW			7	930.479	Mpro+PPACK	30	210407_M_P_1800sec_03	2	4.6076	58210	467.192
MPro	211	218	AVINGDRW			7	930.479	Mpro+PPACK	120	210407_M_P_7200sec_01	2	4.60482	64884	467.241
MPro	211	218	AVINGDRW			7	930.479	Mpro+PPACK	120	210407_M_P_7200sec_02	2	4.5975	39839	467.274
MPro	211	218	AVINGDRW			7	930.479	Mpro+PPACK	120	210407_M_P_7200sec_03	2	4.60794	59695	467.321
MPro	209	218	YAAVINGDRW			9	1164.58	Mpro	0	DE-2021-04-07 M m0 2	1	4.96663	57542	1165.18
MPro	209	218	YAAVINGDRW			9	1164.58	Mpro	0	DE-2021-04-07 M m0 2	2	4.96705	605851	583.094
MPro	209	218	YAAVINGDRW			9	1164.58	Mpro	0	DE-2021-04-07 M m0 3	1	4.96625	74224	1165.16
MPro	209	218	YAAVINGDRW			9	1164.58	Mpro	0	DE-2021-04-07 M m0 3	2	4.96612	851442	583.074
MPro	209	218	YAAVINGDRW			9	1164.58	Mpro	0	DE-2021-04-07 M m0 4	1	4.95718	101647	1165.26
MPro	209	218	YAAVINGDRW			9	1164.58	Mpro	0	DE-2021-04-07 M m0 4	2	4.9562	1120664	583.068
MPro	209	218	YAAVINGDRW			9	1164.58	Mpro	0.25	210407_M_15sec_01	1	4.95656	93431	1167.06
MPro	209	218	YAAVINGDRW			9	1164.58	Mpro	0.25	210407_M_15sec_01	2	4.95743	905949	584.043
MPro	209	218	YAAVINGDRW			9	1164.58	Mpro	0.25	210407_M_15sec_02	1	4.96558	83540	1167.01
MPro	209	218	YAAVINGDRW			9	1164.58	Mpro	0.25	210407_M_15sec_02	2	4.96676	841520	584.054
MPro	209	218	YAAVINGDRW			9	1164.58	Mpro	0.25	210407_M_15sec_03	1	4.95582	55206	1167.14
MPro	209	218	YAAVINGDRW			9	1164.58	Mpro	0.25	210407_M_15sec_03	2	4.95802	623178	584.049
MPro	209	218	YAAVINGDRW			9	1164.58	Mpro	1	210407_M_60sec_01	1	4.95543	91843	1167.33
MPro	209	218	YAAVINGDRW			9	1164.58	Mpro	1	210407_M_60sec_01	2	4.95604	935410	584.149
MPro	209	218	YAAVINGDRW			9	1164.58	Mpro	1	210407_M_60sec_02	1	4.95625	128968	1167.25
MPro	209	218	YAAVINGDRW			9	1164.58	Mpro	1	210407_M_60sec_02	2	4.95867	1246072	584.143
MPro	209	218	YAAVINGDRW			9	1164.58	Mpro	1	210407_M_60sec_03	1	4.95682	131673	1167.18
MPro	209	218	YAAVINGDRW			9	1164.58	Mpro	1	210407_M_60sec_03	2	4.95594	1331461	584.134
MPro	209	218	YAAVINGDRW			9	1164.58	Mpro	5	210407_M_300sec_01	1	4.95549	104578	1167.44
MPro	209	218	YAAVINGDRW			9	1164.58	Mpro	5	210407_M_300sec_01	2	4.95399	1078355	584.222
MPro	209	218	YAAVINGDRW			9	1164.58	Mpro	5	210407_M_300sec_02	1	4.95249	96926	1167.21
MPro	209	218	YAAVINGDRW			9	1164.58	Mpro	5	210407_M_300sec_02	2	4.95497	1150036	584.222
MPro	209	218	YAAVINGDRW			9	1164.58	Mpro	5	210407_M_300sec_03	1	4.96093	110893	1167.31
MPro	209	218	YAAVINGDRW			9	1164.58	Mpro	5	210407_M_300sec_03	2	4.96016	1094391	584.254
MPro	209	218	YAAVINGDRW			9	1164.58	Mpro	30	210407_M_1800sec_01	1	4.95203	101900	1167.63
MPro	209	218	YAAVINGDRW			9	1164.58	Mpro	30	210407_M_1800sec_01	2	4.95226	1006453	584.295
MPro	209	218	YAAVINGDRW			9	1164.58	Mpro	30	210407_M_1800sec_02	1	4.9542	108724	1167.6
MPro	209	218	YAAVINGDRW			9	1164.58	Mpro	30	210407_M_1800sec_02	2	4.95401	1103860	584.283
MPro	209	218	YAAVINGDRW			9	1164.58	Mpro	30	210407_M_1800sec_03	1	4.95291	105945	1167.63
MPro	209	218	YAAVINGDRW			9	1164.58	Mpro	30	210407_M_1800sec_03	2	4.95242	1151056	584.29
MPro	209	218	YAAVINGDRW			9	1164.58	Mpro	120	210407_M_7200sec_01	1	4.95296	98677	1167.75
MPro	209	218	YAAVINGDRW			9	1164.58	Mpro	120	210407_M_7200sec_01	2	4.95487	1037706	584.369
MPro	209	218	YAAVINGDRW			9	1164.58	Mpro	120	210407_M_7200sec_02	1	4.95113	96913	1167.79
MPro	209	218	YAAVINGDRW			9	1164.58	Mpro	120	210407_M_7200sec_02	2	4.95179	1016345	584.377
MPro	209	218	YAAVINGDRW			9	1164.58	Mpro	120	210407_M_7200sec_03	1	4.95377	38436	1167.49
MPro	209	218	YAAVINGDRW			9	1164.58	Mpro	120	210407_M_7200sec_03	2	4.95199	456382	584.296
MPro	209	218	YAAVINGDRW			9	1164.58	Mpro+PPACK	0	DE-2021-04-07 M m0 2	1	4.96663	57542	1165.18
MPro	209	218	YAAVINGDRW			9	1164.58	Mpro+PPACK	0	DE-2021-04-07 M m0 2	2	4.96705	605851	583.094
MPro	209	218	YAAVINGDRW			9	1164.58	Mpro+PPACK	0	DE-2021-04-07 M m0 3	1	4.96625	74224	1165.16
MPro	209	218	YAAVINGDRW			9	1164.58	Mpro+PPACK	0	DE-2021-04-07 M m0 3	2	4.96612	851442	583.074
MPro	209	218	YAAVINGDRW			9	1164.58	Mpro+PPACK	0	DE-2021-04-07 M m0 4	1	4.95718	101647	1165.26
MPro	209	218	YAAVINGDRW			9	1164.58	Mpro+PPACK	0	DE-2021-04-07 M m0 4	2	4.9562	1120664	583.068
MPro	209	218	YAAVINGDRW			9	1164.58	Mpro+PPACK	0.25	210407_M_P_15sec_01	1	4.95975	51178	1167.29
MPro	209	218	YAAVINGDRW			9	1164.58	Mpro+PPACK	0.25	210407_M_P_15sec_01	2	4.96224	520399	584.07
MPro	209	218	YAAVINGDRW			9	1164.58	Mpro+PPACK	0.25	210407_M_P_15sec_02	1	4.96018	50643	1167.29
MPro	209	218	YAAVINGDRW			9	1164.58	Mpro+PPACK	0.25	210407_M_P_15sec_02	2	4.96155	514492	584.131
MPro	209	218	YAAVINGDRW			9	1164.58	Mpro+PPACK	0.25	210407_M_P_15sec_03	1	4.95828	45031	1167.32
MPro	209	218	YAAVINGDRW			9	1164.58	Mpro+PPACK	0.25	210407_M_P_15sec_03	2	4.95955	468446	584.133
MPro	209	218	YAAVINGDRW			9	1164.58	Mpro+PPACK	1	210407_M_P_60sec_01	1	4.96063	18323	1167.06
MPro	209	218	YAAVINGDRW			9	1164.58	Mpro+PPACK	1	210407_M_P_60sec_01	2	4.96168	229760	584.188
MPro	209	218	YAAVINGDRW			9	1164.58	Mpro+PPACK	1	210407_M_P_60sec_02	1	4.96037	32779	1168.27
MPro	209	218	YAAVINGDRW			9	1164.58	Mpro+PPACK	1	210407_M_P_60sec_02	2	4.96028	530085	584.296
MPro	209	218	YAAVINGDRW			9	1164.58	Mpro+PPACK	1	210407_M_P_60sec_03	1	4.96334	13003	1166.29
MPro	209	218	YAAVINGDRW			9	1164.58	Mpro+PPACK	1	210407_M_P_60sec_03	2	4.96251	403367	584.269
MPro	209	218	YAAVINGDRW			9	1164.58	Mpro+PPACK	5	210407_M_P_300sec_01	1	4.95542	20784	1166.8
MPro	209	218	YAAVINGDRW			9	1164.58	Mpro+PPACK	5	210407_M_P_300sec_01	2	4.95518	327067	584.134
MPro	209	218	YAAVINGDRW			9	1164.58	Mpro+PPACK	5	210407_M_P_300sec_02	1	4.95878	48728	1167.51
MPro	209	218	YAAVINGDRW			9	1164.58	Mpro+PPACK	5	210407_M_P_300sec_02	2	4.96019	506802	584.27
MPro	209	218	YAAVINGDRW			9	1164.58	Mpro+PPACK	5	210407_M_P_300sec_03	1	4.9593	43446	1167.47
MPro	209	218	YAAVINGDRW			9	1164.58	Mpro+PPACK	5	210407_M_P_300sec_03	2	4.95807	446040	584.26
MPro	209	218	YAAVINGDRW			9	1164.58	Mpro+PPACK	30	210407_M_P_1800sec_01	1	4.95309	38611	1167.65
MPro	209	218	YAAVINGDRW			9	1164.58	Mpro+PPACK	30	210407_M_P_1800sec_01	2	4.95475	462063	584.372
MPro	209	218	YAAVINGDRW			9	1164.58	Mpro+PPACK	30	210407_M_P_1800sec_02	1	4.9569	17509	1167.98
MPro	209	218	YAAVINGDRW			9	1164.58	Mpro+PPACK	30	210407_M_P_1800sec_02	2	4.9588	241182	584.282
MPro	209	218	YAAVINGDRW			9	1164.58	Mpro+PPACK	30	210407_M_P_1800sec_03	1	4.95616	29010	1167.74
MPro	209	218	YAAVINGDRW			9	1164.58	Mpro+PPACK	30	210407_M_P_1800sec_03	2	4.95735	348199	584.37
MPro	209	218	YAAVINGDRW			9	1164.58	Mpro+PPACK	120	210407_M_P_7200sec_01	1	4.95629	13572	1167.13
MPro	209	218	YAAVINGDRW			9	1164.58	Mpro+PPACK	120	210407_M_P_7200sec_01	2	4.95667	323971	584.431
MPro	209	218	YAAVINGDRW			9	1164.58	Mpro+PPACK	120	210407_M_P_7200sec_02	2	4.95034	335937	584.449
MPro	209	218	YAAVINGDRW			9	1164.58	Mpro+PPACK	120	210407_M_P_7200sec_03	1	4.96458	22072	1167.98
MPro	209	218	YAAVINGDRW			9	1164.58	Mpro+PPACK	120	210407_M_P_7200sec_03	2	4.9603	312756	584.447
MPro	200	205	ITVNVL			5	658.413	Mpro	0	DE-2021-04-07 M m0 2	1	5.23563	59535	658.646
MPro	200	205	ITVNVL			5	658.413	Mpro	0	DE-2021-04-07 M m0 3	1	5.23331	81639	658.764
MPro	200	205	ITVNVL			5	658.413	Mpro	0	DE-2021-04-07 M m0 4	1	5.23534	111530	658.759
MPro	200	205	ITVNVL			5	658.413	Mpro	0.25	210407_M_15sec_01	1	5.23565	105073	658.808
MPro	200	205	ITVNVL			5	658.413	Mpro	0.25	210407_M_15sec_02	1	5.24691	96710	658.848
MPro	200	205	ITVNVL			5	658.413	Mpro	0.25	210407_M_15sec_03	1	5.23734	80918	658.852
MPro	200	205	ITVNVL			5	658.413	Mpro	1	210407_M_60sec_01	1	5.22999	109396	658.921
MPro	200	205	ITVNVL			5	658.413	Mpro	1	210407_M_60sec_02	1	5.23721	150320	658.908
MPro	200	205	ITVNVL			5	658.413	Mpro	1	210407_M_60sec_03	1	5.23426	154960	658.912
MPro	200	205	ITVNVL			5	658.413	Mpro	5	210407_M_300sec_01	1	5.23232	121529	659.207
MPro	200	205	ITVNVL			5	658.413	Mpro	5	210407_M_300sec_02	1	5.23278	126095	659.31
MPro	200	205	ITVNVL			5	658.413	Mpro	5	210407_M_300sec_03	1	5.2356	125229	659.298
MPro	200	205	ITVNVL			5	658.413	Mpro	30	210407_M_1800sec_01	1	5.23116	118433	659.614
MPro	200	205	ITVNVL			5	658.413	Mpro	30	210407_M_1800sec_02	1	5.23232	116344	659.609
MPro	200	205	ITVNVL			5	658.413	Mpro	30	210407_M_1800sec_03	1	5.23015	127902	659.617
MPro	200	205	ITVNVL			5	658.413	Mpro	120	210407_M_7200sec_01	1	5.23368	110091	659.632
MPro	200	205	ITVNVL			5	658.413	Mpro	120	210407_M_7200sec_02	1	5.23054	122215	659.626
MPro	200	205	ITVNVL			5	658.413	Mpro+PPACK	0	DE-2021-04-07 M m0 2	1	5.23563	59535	658.646
MPro	200	205	ITVNVL			5	658.413	Mpro+PPACK	0	DE-2021-04-07 M m0 3	1	5.23331	81639	658.764
MPro	200	205	ITVNVL			5	658.413	Mpro+PPACK	0.25	210407_M_P_15sec_01	1	5.23701	68126	658.852
MPro	200	205	ITVNVL			5	658.413	Mpro+PPACK	0.25	210407_M_P_15sec_02	1	5.23588	59896	658.9
MPro	200	205	ITVNVL			5	658.413	Mpro+PPACK	0.25	210407_M_P_15sec_03	1	5.2369	59543	658.9
MPro	200	205	ITVNVL			5	658.413	Mpro+PPACK	1	210407_M_P_60sec_01	1	5.23996	22759	658.844
MPro	200	205	ITVNVL			5	658.413	Mpro+PPACK	1	210407_M_P_60sec_02	1	5.23567	60476	658.971
MPro	200	205	ITVNVL			5	658.413	Mpro+PPACK	1	210407_M_P_60sec_03	1	5.24065	49563	659.064
MPro	200	205	ITVNVL			5	658.413	Mpro+PPACK	5	210407_M_P_300sec_01	1	5.23495	40447	659.288
MPro	200	205	ITVNVL			5	658.413	Mpro+PPACK	5	210407_M_P_300sec_02	1	5.23877	62245	659.342
MPro	200	205	ITVNVL			5	658.413	Mpro+PPACK	5	210407_M_P_300sec_03	1	5.23434	54443	659.323
MPro	200	205	ITVNVL			5	658.413	Mpro+PPACK	30	210407_M_P_1800sec_01	1	5.23082	50052	659.484
MPro	200	205	ITVNVL			5	658.413	Mpro+PPACK	30	210407_M_P_1800sec_03	1	5.24115	21097	659.418
MPro	200	205	ITVNVL			5	658.413	Mpro+PPACK	120	210407_M_P_7200sec_01	1	5.23701	22887	659.419
MPro	200	205	ITVNVL			5	658.413	Mpro+PPACK	120	210407_M_P_7200sec_02	1	5.23321	35327	659.47
MPro	200	205	ITVNVL			5	658.413	Mpro+PPACK	120	210407_M_P_7200sec_03	1	5.23909	39942	659.475
MPro	177	181	LEGNF			4	579.277	Mpro	0	DE-2021-04-07 M m0 2	1	4.41601	199832	579.551
MPro	177	181	LEGNF			4	579.277	Mpro	0	DE-2021-04-07 M m0 3	1	4.41111	275065	579.519
MPro	177	181	LEGNF			4	579.277	Mpro	0	DE-2021-04-07 M m0 4	1	4.40136	360074	579.53
MPro	177	181	LEGNF			4	579.277	Mpro	0.25	210407_M_15sec_01	1	4.40271	301872	580.378
MPro	177	181	LEGNF			4	579.277	Mpro	0.25	210407_M_15sec_02	1	4.41179	302139	580.385
MPro	177	181	LEGNF			4	579.277	Mpro	0.25	210407_M_15sec_03	1	4.40639	216529	580.397
MPro	177	181	LEGNF			4	579.277	Mpro	1	210407_M_60sec_01	1	4.40181	322768	580.391
MPro	177	181	LEGNF			4	579.277	Mpro	1	210407_M_60sec_02	1	4.40533	449767	580.364
MPro	177	181	LEGNF			4	579.277	Mpro	1	210407_M_60sec_03	1	4.40203	442864	580.371
MPro	177	181	LEGNF			4	579.277	Mpro	5	210407_M_300sec_01	1	4.4007	358270	580.289
MPro	177	181	LEGNF			4	579.277	Mpro	5	210407_M_300sec_02	1	4.40141	392657	580.3
MPro	177	181	LEGNF			4	579.277	Mpro	5	210407_M_300sec_03	1	4.40442	394976	580.308
MPro	177	181	LEGNF			4	579.277	Mpro	30	210407_M_1800sec_01	1	4.3998	350090	580.313
MPro	177	181	LEGNF			4	579.277	Mpro	30	210407_M_1800sec_02	1	4.39933	368057	580.276
MPro	177	181	LEGNF			4	579.277	Mpro	30	210407_M_1800sec_03	1	4.40056	350382	580.293
MPro	177	181	LEGNF			4	579.277	Mpro	120	210407_M_7200sec_01	1	4.40394	356830	580.307
MPro	177	181	LEGNF			4	579.277	Mpro	120	210407_M_7200sec_02	1	4.39957	341410	580.306
MPro	177	181	LEGNF			4	579.277	Mpro	120	210407_M_7200sec_03	1	4.40008	133061	580.261
MPro	177	181	LEGNF			4	579.277	Mpro+PPACK	0	DE-2021-04-07 M m0 2	1	4.41601	199832	579.551
MPro	177	181	LEGNF			4	579.277	Mpro+PPACK	0	DE-2021-04-07 M m0 3	1	4.41111	275065	579.519
MPro	177	181	LEGNF			4	579.277	Mpro+PPACK	0	DE-2021-04-07 M m0 4	1	4.40136	360074	579.53
MPro	177	181	LEGNF			4	579.277	Mpro+PPACK	0.25	210407_M_P_15sec_01	1	4.40224	203422	580.396
MPro	177	181	LEGNF			4	579.277	Mpro+PPACK	0.25	210407_M_P_15sec_02	1	4.40346	208079	580.36
MPro	177	181	LEGNF			4	579.277	Mpro+PPACK	0.25	210407_M_P_15sec_03	1	4.40332	177547	580.358
MPro	177	181	LEGNF			4	579.277	Mpro+PPACK	1	210407_M_P_60sec_01	1	4.40315	55698	580.568
MPro	177	181	LEGNF			4	579.277	Mpro+PPACK	1	210407_M_P_60sec_02	1	4.40221	194395	580.36
MPro	177	181	LEGNF			4	579.277	Mpro+PPACK	1	210407_M_P_60sec_03	1	4.4048	145907	580.35
MPro	177	181	LEGNF			4	579.277	Mpro+PPACK	5	210407_M_P_300sec_01	1	4.40095	104589	580.106
MPro	177	181	LEGNF			4	579.277	Mpro+PPACK	5	210407_M_P_300sec_02	1	4.4012	192267	580.293
MPro	177	181	LEGNF			4	579.277	Mpro+PPACK	5	210407_M_P_300sec_03	1	4.40178	164293	580.318
MPro	177	181	LEGNF			4	579.277	Mpro+PPACK	30	210407_M_P_1800sec_01	1	4.39779	168765	580.292
MPro	177	181	LEGNF			4	579.277	Mpro+PPACK	30	210407_M_P_1800sec_02	1	4.404	83372	580.166
MPro	177	181	LEGNF			4	579.277	Mpro+PPACK	30	210407_M_P_1800sec_03	1	4.40389	113226	580.251
MPro	177	181	LEGNF			4	579.277	Mpro+PPACK	120	210407_M_P_7200sec_01	1	4.40002	123593	580.26
MPro	177	181	LEGNF			4	579.277	Mpro+PPACK	120	210407_M_P_7200sec_02	1	4.39788	101611	580.171
MPro	177	181	LEGNF			4	579.277	Mpro+PPACK	120	210407_M_P_7200sec_03	1	4.40094	116996	580.275
MPro	160	177	CYMHHMELPTGVHAGTDL			16	2011.88	Mpro	0	DE-2021-04-07 M m0 2	2	4.59705	97287	1007.05
MPro	160	177	CYMHHMELPTGVHAGTDL			16	2011.88	Mpro	0	DE-2021-04-07 M m0 2	4	4.5931	153548	504.014
MPro	160	177	CYMHHMELPTGVHAGTDL			16	2011.88	Mpro	0	DE-2021-04-07 M m0 3	2	4.57929	150593	1007.09
MPro	160	177	CYMHHMELPTGVHAGTDL			16	2011.88	Mpro	0	DE-2021-04-07 M m0 3	4	4.57415	300624	504.056
MPro	160	177	CYMHHMELPTGVHAGTDL			16	2011.88	Mpro	0	DE-2021-04-07 M m0 4	2	4.57247	208736	1007.12
MPro	160	177	CYMHHMELPTGVHAGTDL			16	2011.88	Mpro	0	DE-2021-04-07 M m0 4	4	4.57051	398874	504.047
MPro	160	177	CYMHHMELPTGVHAGTDL			16	2011.88	Mpro	0.25	210407_M_15sec_01	2	4.56749	207933	1008.05
MPro	160	177	CYMHHMELPTGVHAGTDL			16	2011.88	Mpro	0.25	210407_M_15sec_01	4	4.56598	386613	504.329
MPro	160	177	CYMHHMELPTGVHAGTDL			16	2011.88	Mpro	0.25	210407_M_15sec_02	2	4.5786	219032	1008.04
MPro	160	177	CYMHHMELPTGVHAGTDL			16	2011.88	Mpro	0.25	210407_M_15sec_02	4	4.58003	377428	504.357
MPro	160	177	CYMHHMELPTGVHAGTDL			16	2011.88	Mpro	0.25	210407_M_15sec_03	2	4.57115	155567	1007.97
MPro	160	177	CYMHHMELPTGVHAGTDL			16	2011.88	Mpro	0.25	210407_M_15sec_03	4	4.57412	296129	504.348
MPro	160	177	CYMHHMELPTGVHAGTDL			16	2011.88	Mpro	1	210407_M_60sec_01	2	4.56496	221428	1008.22
MPro	160	177	CYMHHMELPTGVHAGTDL			16	2011.88	Mpro	1	210407_M_60sec_01	4	4.56565	407602	504.402
MPro	160	177	CYMHHMELPTGVHAGTDL			16	2011.88	Mpro	1	210407_M_60sec_02	2	4.56467	321246	1008.2
MPro	160	177	CYMHHMELPTGVHAGTDL			16	2011.88	Mpro	1	210407_M_60sec_02	4	4.56905	568001	504.402
MPro	160	177	CYMHHMELPTGVHAGTDL			16	2011.88	Mpro	1	210407_M_60sec_03	2	4.56498	342705	1008.19
MPro	160	177	CYMHHMELPTGVHAGTDL			16	2011.88	Mpro	1	210407_M_60sec_03	4	4.56215	586633	504.378
MPro	160	177	CYMHHMELPTGVHAGTDL			16	2011.88	Mpro	5	210407_M_300sec_01	2	4.56743	264560	1008.19
MPro	160	177	CYMHHMELPTGVHAGTDL			16	2011.88	Mpro	5	210407_M_300sec_01	4	4.56627	507722	504.371
MPro	160	177	CYMHHMELPTGVHAGTDL			16	2011.88	Mpro	5	210407_M_300sec_02	2	4.56632	271824	1008.22
MPro	160	177	CYMHHMELPTGVHAGTDL			16	2011.88	Mpro	5	210407_M_300sec_02	4	4.56577	540554	504.394
MPro	160	177	CYMHHMELPTGVHAGTDL			16	2011.88	Mpro	5	210407_M_300sec_03	2	4.57094	268135	1008.25
MPro	160	177	CYMHHMELPTGVHAGTDL			16	2011.88	Mpro	5	210407_M_300sec_03	4	4.56915	525181	504.404
MPro	160	177	CYMHHMELPTGVHAGTDL			16	2011.88	Mpro	30	210407_M_1800sec_01	2	4.56441	234828	1008.55
MPro	160	177	CYMHHMELPTGVHAGTDL			16	2011.88	Mpro	30	210407_M_1800sec_01	4	4.56248	458492	504.481
MPro	160	177	CYMHHMELPTGVHAGTDL			16	2011.88	Mpro	30	210407_M_1800sec_02	2	4.56306	250012	1008.51
MPro	160	177	CYMHHMELPTGVHAGTDL			16	2011.88	Mpro	30	210407_M_1800sec_02	4	4.56371	484608	504.499
MPro	160	177	CYMHHMELPTGVHAGTDL			16	2011.88	Mpro	30	210407_M_1800sec_03	2	4.5665	260439	1008.52
MPro	160	177	CYMHHMELPTGVHAGTDL			16	2011.88	Mpro	30	210407_M_1800sec_03	4	4.56626	519645	504.512
MPro	160	177	CYMHHMELPTGVHAGTDL			16	2011.88	Mpro	120	210407_M_7200sec_01	2	4.56817	218639	1009.03
MPro	160	177	CYMHHMELPTGVHAGTDL			16	2011.88	Mpro	120	210407_M_7200sec_01	4	4.56954	464293	504.652
MPro	160	177	CYMHHMELPTGVHAGTDL			16	2011.88	Mpro	120	210407_M_7200sec_02	2	4.56768	229518	1008.91
MPro	160	177	CYMHHMELPTGVHAGTDL			16	2011.88	Mpro	120	210407_M_7200sec_02	4	4.56522	470550	504.642
MPro	160	177	CYMHHMELPTGVHAGTDL			16	2011.88	Mpro	120	210407_M_7200sec_03	2	4.56707	91522	1008.79
MPro	160	177	CYMHHMELPTGVHAGTDL			16	2011.88	Mpro	120	210407_M_7200sec_03	4	4.56733	207551	504.589
MPro	160	177	CYMHHMELPTGVHAGTDL			16	2011.88	Mpro+PPACK	0	DE-2021-04-07 M m0 2	2	4.59705	97287	1007.05
MPro	160	177	CYMHHMELPTGVHAGTDL			16	2011.88	Mpro+PPACK	0	DE-2021-04-07 M m0 2	4	4.5931	153548	504.014
MPro	160	177	CYMHHMELPTGVHAGTDL			16	2011.88	Mpro+PPACK	0	DE-2021-04-07 M m0 3	2	4.57929	150593	1007.09
MPro	160	177	CYMHHMELPTGVHAGTDL			16	2011.88	Mpro+PPACK	0	DE-2021-04-07 M m0 3	4	4.57415	300624	504.056
MPro	160	177	CYMHHMELPTGVHAGTDL			16	2011.88	Mpro+PPACK	0	DE-2021-04-07 M m0 4	2	4.57247	208736	1007.12
MPro	160	177	CYMHHMELPTGVHAGTDL			16	2011.88	Mpro+PPACK	0	DE-2021-04-07 M m0 4	4	4.57051	398874	504.047
MPro	160	177	CYMHHMELPTGVHAGTDL			16	2011.88	Mpro+PPACK	0.25	210407_M_P_15sec_01	2	4.56767	198903	1008.02
MPro	160	177	CYMHHMELPTGVHAGTDL			16	2011.88	Mpro+PPACK	0.25	210407_M_P_15sec_01	4	4.57692	225405	504.292
MPro	160	177	CYMHHMELPTGVHAGTDL			16	2011.88	Mpro+PPACK	0.25	210407_M_P_15sec_02	2	4.56624	188395	1008.09
MPro	160	177	CYMHHMELPTGVHAGTDL			16	2011.88	Mpro+PPACK	0.25	210407_M_P_15sec_02	4	4.57539	216957	504.351
MPro	160	177	CYMHHMELPTGVHAGTDL			16	2011.88	Mpro+PPACK	0.25	210407_M_P_15sec_03	2	4.56743	176888	1008.19
MPro	160	177	CYMHHMELPTGVHAGTDL			16	2011.88	Mpro+PPACK	0.25	210407_M_P_15sec_03	4	4.5771	199160	504.346
MPro	160	177	CYMHHMELPTGVHAGTDL			16	2011.88	Mpro+PPACK	1	210407_M_P_60sec_01	2	4.56946	90094	1008.04
MPro	160	177	CYMHHMELPTGVHAGTDL			16	2011.88	Mpro+PPACK	1	210407_M_P_60sec_01	4	4.58766	111719	504.316
MPro	160	177	CYMHHMELPTGVHAGTDL			16	2011.88	Mpro+PPACK	1	210407_M_P_60sec_02	2	4.56475	199824	1008.2
MPro	160	177	CYMHHMELPTGVHAGTDL			16	2011.88	Mpro+PPACK	1	210407_M_P_60sec_02	4	4.58057	221937	504.376
MPro	160	177	CYMHHMELPTGVHAGTDL			16	2011.88	Mpro+PPACK	1	210407_M_P_60sec_03	2	4.56849	157710	1008.3
MPro	160	177	CYMHHMELPTGVHAGTDL			16	2011.88	Mpro+PPACK	1	210407_M_P_60sec_03	4	4.58601	184197	504.382
MPro	160	177	CYMHHMELPTGVHAGTDL			16	2011.88	Mpro+PPACK	5	210407_M_P_300sec_01	2	4.56244	123576	1008.11
MPro	160	177	CYMHHMELPTGVHAGTDL			16	2011.88	Mpro+PPACK	5	210407_M_P_300sec_01	4	4.58059	146035	504.31
MPro	160	177	CYMHHMELPTGVHAGTDL			16	2011.88	Mpro+PPACK	5	210407_M_P_300sec_02	2	4.56488	184688	1008.21
MPro	160	177	CYMHHMELPTGVHAGTDL			16	2011.88	Mpro+PPACK	5	210407_M_P_300sec_02	4	4.57979	216134	504.338
MPro	160	177	CYMHHMELPTGVHAGTDL			16	2011.88	Mpro+PPACK	5	210407_M_P_300sec_03	2	4.56622	171986	1008.21
MPro	160	177	CYMHHMELPTGVHAGTDL			16	2011.88	Mpro+PPACK	5	210407_M_P_300sec_03	4	4.58326	208264	504.385
MPro	160	177	CYMHHMELPTGVHAGTDL			16	2011.88	Mpro+PPACK	30	210407_M_P_1800sec_01	2	4.56086	173579	1008.56
MPro	160	177	CYMHHMELPTGVHAGTDL			16	2011.88	Mpro+PPACK	30	210407_M_P_1800sec_01	4	4.5816	209066	504.486
MPro	160	177	CYMHHMELPTGVHAGTDL			16	2011.88	Mpro+PPACK	30	210407_M_P_1800sec_02	2	4.57294	83488	1008.36
MPro	160	177	CYMHHMELPTGVHAGTDL			16	2011.88	Mpro+PPACK	30	210407_M_P_1800sec_02	4	4.58606	110223	504.43
MPro	160	177	CYMHHMELPTGVHAGTDL			16	2011.88	Mpro+PPACK	30	210407_M_P_1800sec_03	2	4.56895	104277	1008.4
MPro	160	177	CYMHHMELPTGVHAGTDL			16	2011.88	Mpro+PPACK	30	210407_M_P_1800sec_03	4	4.59065	143407	504.444
MPro	160	177	CYMHHMELPTGVHAGTDL			16	2011.88	Mpro+PPACK	120	210407_M_P_7200sec_01	2	4.56863	107141	1008.94
MPro	160	177	CYMHHMELPTGVHAGTDL			16	2011.88	Mpro+PPACK	120	210407_M_P_7200sec_01	4	4.58576	142577	504.568
MPro	160	177	CYMHHMELPTGVHAGTDL			16	2011.88	Mpro+PPACK	120	210407_M_P_7200sec_02	2	4.54289	47852	1008.82
MPro	160	177	CYMHHMELPTGVHAGTDL			16	2011.88	Mpro+PPACK	120	210407_M_P_7200sec_02	4	4.5786	115406	504.631
MPro	160	177	CYMHHMELPTGVHAGTDL			16	2011.88	Mpro+PPACK	120	210407_M_P_7200sec_03	2	4.56468	101781	1008.86
MPro	160	177	CYMHHMELPTGVHAGTDL			16	2011.88	Mpro+PPACK	120	210407_M_P_7200sec_03	4	4.58183	146261	504.571
MPro	161	177	YMHHMELPTGVHAGTDL			15	1908.87	Mpro	0	DE-2021-04-07 M m0 2	3	4.44962	55146	637.265
MPro	161	177	YMHHMELPTGVHAGTDL			15	1908.87	Mpro	0	DE-2021-04-07 M m0 2	4	4.45128	46201	478.196
MPro	161	177	YMHHMELPTGVHAGTDL			15	1908.87	Mpro	0	DE-2021-04-07 M m0 3	3	4.44636	94199	637.319
MPro	161	177	YMHHMELPTGVHAGTDL			15	1908.87	Mpro	0	DE-2021-04-07 M m0 3	4	4.44845	69251	478.249
MPro	161	177	YMHHMELPTGVHAGTDL			15	1908.87	Mpro	0	DE-2021-04-07 M m0 4	3	4.44109	113799	637.364
MPro	161	177	YMHHMELPTGVHAGTDL			15	1908.87	Mpro	0	DE-2021-04-07 M m0 4	4	4.4452	82133	478.246
MPro	161	177	YMHHMELPTGVHAGTDL			15	1908.87	Mpro	0.25	210407_M_15sec_01	3	4.44238	120984	637.904
MPro	161	177	YMHHMELPTGVHAGTDL			15	1908.87	Mpro	0.25	210407_M_15sec_01	4	4.44281	91694	478.569
MPro	161	177	YMHHMELPTGVHAGTDL			15	1908.87	Mpro	0.25	210407_M_15sec_02	3	4.45198	117602	637.916
MPro	161	177	YMHHMELPTGVHAGTDL			15	1908.87	Mpro	0.25	210407_M_15sec_02	4	4.45222	83762	478.565
MPro	161	177	YMHHMELPTGVHAGTDL			15	1908.87	Mpro	0.25	210407_M_15sec_03	3	4.44262	99968	638.048
MPro	161	177	YMHHMELPTGVHAGTDL			15	1908.87	Mpro	0.25	210407_M_15sec_03	4	4.44602	49696	478.546
MPro	161	177	YMHHMELPTGVHAGTDL			15	1908.87	Mpro	1	210407_M_60sec_01	3	4.43829	122377	638.019
MPro	161	177	YMHHMELPTGVHAGTDL			15	1908.87	Mpro	1	210407_M_60sec_01	4	4.4428	81364	478.597
MPro	161	177	YMHHMELPTGVHAGTDL			15	1908.87	Mpro	1	210407_M_60sec_02	3	4.44258	158169	638.074
MPro	161	177	YMHHMELPTGVHAGTDL			15	1908.87	Mpro	1	210407_M_60sec_02	4	4.44711	104944	478.591
MPro	161	177	YMHHMELPTGVHAGTDL			15	1908.87	Mpro	1	210407_M_60sec_03	3	4.44156	171484	638.021
MPro	161	177	YMHHMELPTGVHAGTDL			15	1908.87	Mpro	1	210407_M_60sec_03	4	4.44323	109275	478.553
MPro	161	177	YMHHMELPTGVHAGTDL			15	1908.87	Mpro	5	210407_M_300sec_01	3	4.43869	132793	638.113
MPro	161	177	YMHHMELPTGVHAGTDL			15	1908.87	Mpro	5	210407_M_300sec_01	4	4.44337	99302	478.546
MPro	161	177	YMHHMELPTGVHAGTDL			15	1908.87	Mpro	5	210407_M_300sec_02	3	4.44215	134669	638.042
MPro	161	177	YMHHMELPTGVHAGTDL			15	1908.87	Mpro	5	210407_M_300sec_02	4	4.44339	95531	478.616
MPro	161	177	YMHHMELPTGVHAGTDL			15	1908.87	Mpro	5	210407_M_300sec_03	3	4.44324	143051	638.113
MPro	161	177	YMHHMELPTGVHAGTDL			15	1908.87	Mpro	5	210407_M_300sec_03	4	4.44886	102539	478.596
MPro	161	177	YMHHMELPTGVHAGTDL			15	1908.87	Mpro	30	210407_M_1800sec_01	3	4.44257	125151	638.269
MPro	161	177	YMHHMELPTGVHAGTDL			15	1908.87	Mpro	30	210407_M_1800sec_01	4	4.44409	86453	478.628
MPro	161	177	YMHHMELPTGVHAGTDL			15	1908.87	Mpro	30	210407_M_1800sec_02	3	4.44014	129596	638.239
MPro	161	177	YMHHMELPTGVHAGTDL			15	1908.87	Mpro	30	210407_M_1800sec_02	4	4.44386	85200	478.639
MPro	161	177	YMHHMELPTGVHAGTDL			15	1908.87	Mpro	30	210407_M_1800sec_03	3	4.43881	133222	638.231
MPro	161	177	YMHHMELPTGVHAGTDL			15	1908.87	Mpro	30	210407_M_1800sec_03	4	4.44339	84195	478.744
MPro	161	177	YMHHMELPTGVHAGTDL			15	1908.87	Mpro	120	210407_M_7200sec_01	3	4.44372	113695	638.49
MPro	161	177	YMHHMELPTGVHAGTDL			15	1908.87	Mpro	120	210407_M_7200sec_01	4	4.44718	75927	478.828
MPro	161	177	YMHHMELPTGVHAGTDL			15	1908.87	Mpro	120	210407_M_7200sec_02	3	4.43893	109574	638.575
MPro	161	177	YMHHMELPTGVHAGTDL			15	1908.87	Mpro	120	210407_M_7200sec_02	4	4.44129	76902	478.839
MPro	161	177	YMHHMELPTGVHAGTDL			15	1908.87	Mpro	120	210407_M_7200sec_03	3	4.4513	50080	638.487
MPro	161	177	YMHHMELPTGVHAGTDL			15	1908.87	Mpro	120	210407_M_7200sec_03	4	4.44925	23776	478.717
MPro	161	177	YMHHMELPTGVHAGTDL			15	1908.87	Mpro+PPACK	0	DE-2021-04-07 M m0 2	3	4.44962	55146	637.265
MPro	161	177	YMHHMELPTGVHAGTDL			15	1908.87	Mpro+PPACK	0	DE-2021-04-07 M m0 2	4	4.45128	46201	478.196
MPro	161	177	YMHHMELPTGVHAGTDL			15	1908.87	Mpro+PPACK	0	DE-2021-04-07 M m0 3	3	4.44636	94199	637.319
MPro	161	177	YMHHMELPTGVHAGTDL			15	1908.87	Mpro+PPACK	0	DE-2021-04-07 M m0 3	4	4.44845	69251	478.249
MPro	161	177	YMHHMELPTGVHAGTDL			15	1908.87	Mpro+PPACK	0	DE-2021-04-07 M m0 4	3	4.44109	113799	637.364
MPro	161	177	YMHHMELPTGVHAGTDL			15	1908.87	Mpro+PPACK	0	DE-2021-04-07 M m0 4	4	4.4452	82133	478.246
MPro	161	177	YMHHMELPTGVHAGTDL			15	1908.87	Mpro+PPACK	0.25	210407_M_P_15sec_01	3	4.44327	100317	637.858
MPro	161	177	YMHHMELPTGVHAGTDL			15	1908.87	Mpro+PPACK	0.25	210407_M_P_15sec_01	4	4.44251	53098	478.504
MPro	161	177	YMHHMELPTGVHAGTDL			15	1908.87	Mpro+PPACK	0.25	210407_M_P_15sec_02	3	4.4434	95027	638.002
MPro	161	177	YMHHMELPTGVHAGTDL			15	1908.87	Mpro+PPACK	0.25	210407_M_P_15sec_02	4	4.44351	61098	478.47
MPro	161	177	YMHHMELPTGVHAGTDL			15	1908.87	Mpro+PPACK	0.25	210407_M_P_15sec_03	3	4.44012	100351	638.071
MPro	161	177	YMHHMELPTGVHAGTDL			15	1908.87	Mpro+PPACK	0.25	210407_M_P_15sec_03	4	4.44106	62176	478.573
MPro	161	177	YMHHMELPTGVHAGTDL			15	1908.87	Mpro+PPACK	1	210407_M_P_60sec_01	3	4.4538	46976	637.944
MPro	161	177	YMHHMELPTGVHAGTDL			15	1908.87	Mpro+PPACK	1	210407_M_P_60sec_01	4	4.44638	25040	478.471
MPro	161	177	YMHHMELPTGVHAGTDL			15	1908.87	Mpro+PPACK	1	210407_M_P_60sec_02	3	4.44408	110263	638.103
MPro	161	177	YMHHMELPTGVHAGTDL			15	1908.87	Mpro+PPACK	1	210407_M_P_60sec_02	4	4.44599	56517	478.557
MPro	161	177	YMHHMELPTGVHAGTDL			15	1908.87	Mpro+PPACK	1	210407_M_P_60sec_03	3	4.44558	85163	638.057
MPro	161	177	YMHHMELPTGVHAGTDL			15	1908.87	Mpro+PPACK	1	210407_M_P_60sec_03	4	4.45002	53889	478.643
MPro	161	177	YMHHMELPTGVHAGTDL			15	1908.87	Mpro+PPACK	5	210407_M_P_300sec_02	3	4.44301	100611	638.128
MPro	161	177	YMHHMELPTGVHAGTDL			15	1908.87	Mpro+PPACK	5	210407_M_P_300sec_02	4	4.44908	74758	478.533
MPro	161	177	YMHHMELPTGVHAGTDL			15	1908.87	Mpro+PPACK	5	210407_M_P_300sec_03	3	4.4496	94246	638.047
MPro	161	177	YMHHMELPTGVHAGTDL			15	1908.87	Mpro+PPACK	5	210407_M_P_300sec_03	4	4.44848	72338	478.574
MPro	161	177	YMHHMELPTGVHAGTDL			15	1908.87	Mpro+PPACK	30	210407_M_P_1800sec_01	3	4.44398	98090	638.3
MPro	161	177	YMHHMELPTGVHAGTDL			15	1908.87	Mpro+PPACK	30	210407_M_P_1800sec_01	4	4.44465	58036	478.719
MPro	161	177	YMHHMELPTGVHAGTDL			15	1908.87	Mpro+PPACK	30	210407_M_P_1800sec_02	3	4.44445	46644	638.117
MPro	161	177	YMHHMELPTGVHAGTDL			15	1908.87	Mpro+PPACK	30	210407_M_P_1800sec_02	4	4.44928	32140	478.616
MPro	161	177	YMHHMELPTGVHAGTDL			15	1908.87	Mpro+PPACK	30	210407_M_P_1800sec_03	3	4.45263	62712	638.259
MPro	161	177	YMHHMELPTGVHAGTDL			15	1908.87	Mpro+PPACK	30	210407_M_P_1800sec_03	4	4.44236	34669	478.598
MPro	161	177	YMHHMELPTGVHAGTDL			15	1908.87	Mpro+PPACK	120	210407_M_P_7200sec_01	3	4.44672	65411	638.511
MPro	161	177	YMHHMELPTGVHAGTDL			15	1908.87	Mpro+PPACK	120	210407_M_P_7200sec_01	4	4.44457	35137	478.827
MPro	161	177	YMHHMELPTGVHAGTDL			15	1908.87	Mpro+PPACK	120	210407_M_P_7200sec_02	3	4.44155	58849	638.476
MPro	161	177	YMHHMELPTGVHAGTDL			15	1908.87	Mpro+PPACK	120	210407_M_P_7200sec_02	4	4.44828	39770	478.72
MPro	161	177	YMHHMELPTGVHAGTDL			15	1908.87	Mpro+PPACK	120	210407_M_P_7200sec_03	3	4.44634	62501	638.682
MPro	161	177	YMHHMELPTGVHAGTDL			15	1908.87	Mpro+PPACK	120	210407_M_P_7200sec_03	4	4.45558	32025	478.618
MPro	160	176	CYMHHMELPTGVHAGTD			15	1898.8	Mpro	0	DE-2021-04-07 M m0 2	3	4.18526	205378	634.025
MPro	160	176	CYMHHMELPTGVHAGTD			15	1898.8	Mpro	0	DE-2021-04-07 M m0 3	3	4.17277	400736	634.021
MPro	160	176	CYMHHMELPTGVHAGTD			15	1898.8	Mpro	0	DE-2021-04-07 M m0 4	3	4.16509	535988	634.031
MPro	160	176	CYMHHMELPTGVHAGTD			15	1898.8	Mpro	0.25	210407_M_15sec_01	3	4.16133	521375	634.663
MPro	160	176	CYMHHMELPTGVHAGTD			15	1898.8	Mpro	0.25	210407_M_15sec_02	3	4.17277	500946	634.657
MPro	160	176	CYMHHMELPTGVHAGTD			15	1898.8	Mpro	0.25	210407_M_15sec_03	3	4.16584	378589	634.659
MPro	160	176	CYMHHMELPTGVHAGTD			15	1898.8	Mpro	1	210407_M_60sec_01	3	4.15985	546136	634.751
MPro	160	176	CYMHHMELPTGVHAGTD			15	1898.8	Mpro	1	210407_M_60sec_02	3	4.16412	763635	634.774
MPro	160	176	CYMHHMELPTGVHAGTD			15	1898.8	Mpro	1	210407_M_60sec_03	3	4.16239	776066	634.719
MPro	160	176	CYMHHMELPTGVHAGTD			15	1898.8	Mpro	5	210407_M_300sec_01	3	4.15862	646722	634.735
MPro	160	176	CYMHHMELPTGVHAGTD			15	1898.8	Mpro	5	210407_M_300sec_02	3	4.15862	667542	634.754
MPro	160	176	CYMHHMELPTGVHAGTD			15	1898.8	Mpro	5	210407_M_300sec_03	3	4.1626	658651	634.758
MPro	160	176	CYMHHMELPTGVHAGTD			15	1898.8	Mpro	30	210407_M_1800sec_01	3	4.1579	629183	634.943
MPro	160	176	CYMHHMELPTGVHAGTD			15	1898.8	Mpro	30	210407_M_1800sec_02	3	4.15689	655527	634.906
MPro	160	176	CYMHHMELPTGVHAGTD			15	1898.8	Mpro	30	210407_M_1800sec_03	3	4.15649	661562	634.947
MPro	160	176	CYMHHMELPTGVHAGTD			15	1898.8	Mpro	120	210407_M_7200sec_01	3	4.15994	577195	635.116
MPro	160	176	CYMHHMELPTGVHAGTD			15	1898.8	Mpro	120	210407_M_7200sec_02	3	4.15967	594759	635.117
MPro	160	176	CYMHHMELPTGVHAGTD			15	1898.8	Mpro	120	210407_M_7200sec_03	3	4.16168	300734	635.089
MPro	160	176	CYMHHMELPTGVHAGTD			15	1898.8	Mpro+PPACK	0	DE-2021-04-07 M m0 2	3	4.18526	205378	634.025
MPro	160	176	CYMHHMELPTGVHAGTD			15	1898.8	Mpro+PPACK	0	DE-2021-04-07 M m0 3	3	4.17277	400736	634.021
MPro	160	176	CYMHHMELPTGVHAGTD			15	1898.8	Mpro+PPACK	0	DE-2021-04-07 M m0 4	3	4.16509	535988	634.031
MPro	160	176	CYMHHMELPTGVHAGTD			15	1898.8	Mpro+PPACK	0.25	210407_M_P_15sec_01	3	4.16449	364950	634.65
MPro	160	176	CYMHHMELPTGVHAGTD			15	1898.8	Mpro+PPACK	0.25	210407_M_P_15sec_02	3	4.16497	335319	634.636
MPro	160	176	CYMHHMELPTGVHAGTD			15	1898.8	Mpro+PPACK	0.25	210407_M_P_15sec_03	3	4.16298	331938	634.674
MPro	160	176	CYMHHMELPTGVHAGTD			15	1898.8	Mpro+PPACK	1	210407_M_P_60sec_01	3	4.1673	165959	634.708
MPro	160	176	CYMHHMELPTGVHAGTD			15	1898.8	Mpro+PPACK	1	210407_M_P_60sec_02	3	4.16329	367457	634.765
MPro	160	176	CYMHHMELPTGVHAGTD			15	1898.8	Mpro+PPACK	1	210407_M_P_60sec_03	3	4.16721	287438	634.809
MPro	160	176	CYMHHMELPTGVHAGTD			15	1898.8	Mpro+PPACK	5	210407_M_P_300sec_01	3	4.16061	237071	634.654
MPro	160	176	CYMHHMELPTGVHAGTD			15	1898.8	Mpro+PPACK	5	210407_M_P_300sec_02	3	4.16246	371206	634.761
MPro	160	176	CYMHHMELPTGVHAGTD			15	1898.8	Mpro+PPACK	5	210407_M_P_300sec_03	3	4.16437	310875	634.756
MPro	160	176	CYMHHMELPTGVHAGTD			15	1898.8	Mpro+PPACK	30	210407_M_P_1800sec_01	3	4.15932	327867	634.907
MPro	160	176	CYMHHMELPTGVHAGTD			15	1898.8	Mpro+PPACK	30	210407_M_P_1800sec_02	3	4.16744	142774	634.626
MPro	160	176	CYMHHMELPTGVHAGTD			15	1898.8	Mpro+PPACK	30	210407_M_P_1800sec_03	3	4.16595	236732	634.874
MPro	160	176	CYMHHMELPTGVHAGTD			15	1898.8	Mpro+PPACK	120	210407_M_P_7200sec_01	3	4.16277	245402	635.066
MPro	160	176	CYMHHMELPTGVHAGTD			15	1898.8	Mpro+PPACK	120	210407_M_P_7200sec_02	3	4.158	217758	635.05
MPro	160	176	CYMHHMELPTGVHAGTD			15	1898.8	Mpro+PPACK	120	210407_M_P_7200sec_03	3	4.16099	231347	635.1
MPro	161	176	YMHHMELPTGVHAGTD			14	1795.79	Mpro	0	DE-2021-04-07 M m0 2	2	3.99546	14122	898.633
MPro	161	176	YMHHMELPTGVHAGTD			14	1795.79	Mpro	0	DE-2021-04-07 M m0 2	3	4.00356	78766	599.608
MPro	161	176	YMHHMELPTGVHAGTD			14	1795.79	Mpro	0	DE-2021-04-07 M m0 3	2	3.99365	40242	898.962
MPro	161	176	YMHHMELPTGVHAGTD			14	1795.79	Mpro	0	DE-2021-04-07 M m0 3	3	3.99686	116215	599.635
MPro	161	176	YMHHMELPTGVHAGTD			14	1795.79	Mpro	0	DE-2021-04-07 M m0 4	2	3.99004	45199	898.893
MPro	161	176	YMHHMELPTGVHAGTD			14	1795.79	Mpro	0	DE-2021-04-07 M m0 4	3	3.99086	136107	599.659
MPro	161	176	YMHHMELPTGVHAGTD			14	1795.79	Mpro	0.25	210407_M_15sec_01	2	3.98909	39473	899.857
MPro	161	176	YMHHMELPTGVHAGTD			14	1795.79	Mpro	0.25	210407_M_15sec_01	3	3.99065	136057	600.175
MPro	161	176	YMHHMELPTGVHAGTD			14	1795.79	Mpro	0.25	210407_M_15sec_02	2	3.99923	41354	899.9
MPro	161	176	YMHHMELPTGVHAGTD			14	1795.79	Mpro	0.25	210407_M_15sec_02	3	4.00059	128197	600.185
MPro	161	176	YMHHMELPTGVHAGTD			14	1795.79	Mpro	0.25	210407_M_15sec_03	2	3.98837	28828	899.663
MPro	161	176	YMHHMELPTGVHAGTD			14	1795.79	Mpro	0.25	210407_M_15sec_03	3	3.99324	96001	600.172
MPro	161	176	YMHHMELPTGVHAGTD			14	1795.79	Mpro	1	210407_M_60sec_01	2	3.98372	47031	900.047
MPro	161	176	YMHHMELPTGVHAGTD			14	1795.79	Mpro	1	210407_M_60sec_01	3	3.9888	139473	600.267
MPro	161	176	YMHHMELPTGVHAGTD			14	1795.79	Mpro	1	210407_M_60sec_02	2	3.99065	58102	899.949
MPro	161	176	YMHHMELPTGVHAGTD			14	1795.79	Mpro	1	210407_M_60sec_02	3	3.99354	187436	600.315
MPro	161	176	YMHHMELPTGVHAGTD			14	1795.79	Mpro	1	210407_M_60sec_03	2	3.99049	61714	900.067
MPro	161	176	YMHHMELPTGVHAGTD			14	1795.79	Mpro	1	210407_M_60sec_03	3	3.98836	172569	600.27
MPro	161	176	YMHHMELPTGVHAGTD			14	1795.79	Mpro	5	210407_M_300sec_01	2	3.98526	50478	900.107
MPro	161	176	YMHHMELPTGVHAGTD			14	1795.79	Mpro	5	210407_M_300sec_01	3	3.98648	157263	600.238
MPro	161	176	YMHHMELPTGVHAGTD			14	1795.79	Mpro	5	210407_M_300sec_02	2	3.99205	52378	900.074
MPro	161	176	YMHHMELPTGVHAGTD			14	1795.79	Mpro	5	210407_M_300sec_02	3	3.99324	169154	600.303
MPro	161	176	YMHHMELPTGVHAGTD			14	1795.79	Mpro	5	210407_M_300sec_03	2	3.99167	56889	900.075
MPro	161	176	YMHHMELPTGVHAGTD			14	1795.79	Mpro	5	210407_M_300sec_03	3	3.99602	154684	600.33
MPro	161	176	YMHHMELPTGVHAGTD			14	1795.79	Mpro	30	210407_M_1800sec_01	2	3.98874	42323	900.235
MPro	161	176	YMHHMELPTGVHAGTD			14	1795.79	Mpro	30	210407_M_1800sec_01	3	3.9909	150957	600.423
MPro	161	176	YMHHMELPTGVHAGTD			14	1795.79	Mpro	30	210407_M_1800sec_02	2	3.98908	39819	900.319
MPro	161	176	YMHHMELPTGVHAGTD			14	1795.79	Mpro	30	210407_M_1800sec_02	3	3.98873	145646	600.449
MPro	161	176	YMHHMELPTGVHAGTD			14	1795.79	Mpro	30	210407_M_1800sec_03	2	3.99106	48920	900.167
MPro	161	176	YMHHMELPTGVHAGTD			14	1795.79	Mpro	30	210407_M_1800sec_03	3	3.98139	137684	600.481
MPro	161	176	YMHHMELPTGVHAGTD			14	1795.79	Mpro	120	210407_M_7200sec_01	2	3.98719	49378	900.603
MPro	161	176	YMHHMELPTGVHAGTD			14	1795.79	Mpro	120	210407_M_7200sec_01	3	3.98405	131999	600.586
MPro	161	176	YMHHMELPTGVHAGTD			14	1795.79	Mpro	120	210407_M_7200sec_02	2	3.99345	44579	900.646
MPro	161	176	YMHHMELPTGVHAGTD			14	1795.79	Mpro	120	210407_M_7200sec_02	3	3.98588	132749	600.607
MPro	161	176	YMHHMELPTGVHAGTD			14	1795.79	Mpro	120	210407_M_7200sec_03	3	3.99293	68114	600.582
MPro	161	176	YMHHMELPTGVHAGTD			14	1795.79	Mpro+PPACK	0	DE-2021-04-07 M m0 2	2	3.99546	14122	898.633
MPro	161	176	YMHHMELPTGVHAGTD			14	1795.79	Mpro+PPACK	0	DE-2021-04-07 M m0 2	3	4.00356	78766	599.608
MPro	161	176	YMHHMELPTGVHAGTD			14	1795.79	Mpro+PPACK	0	DE-2021-04-07 M m0 3	2	3.99365	40242	898.962
MPro	161	176	YMHHMELPTGVHAGTD			14	1795.79	Mpro+PPACK	0	DE-2021-04-07 M m0 3	3	3.99686	116215	599.635
MPro	161	176	YMHHMELPTGVHAGTD			14	1795.79	Mpro+PPACK	0	DE-2021-04-07 M m0 4	2	3.99004	45199	898.893
MPro	161	176	YMHHMELPTGVHAGTD			14	1795.79	Mpro+PPACK	0	DE-2021-04-07 M m0 4	3	3.99086	136107	599.659
MPro	161	176	YMHHMELPTGVHAGTD			14	1795.79	Mpro+PPACK	0.25	210407_M_P_15sec_01	2	3.98931	44493	899.869
MPro	161	176	YMHHMELPTGVHAGTD			14	1795.79	Mpro+PPACK	0.25	210407_M_P_15sec_01	3	3.994	61119	600.199
MPro	161	176	YMHHMELPTGVHAGTD			14	1795.79	Mpro+PPACK	0.25	210407_M_P_15sec_02	2	3.98837	25773	899.503
MPro	161	176	YMHHMELPTGVHAGTD			14	1795.79	Mpro+PPACK	0.25	210407_M_P_15sec_02	3	3.99804	61143	600.207
MPro	161	176	YMHHMELPTGVHAGTD			14	1795.79	Mpro+PPACK	0.25	210407_M_P_15sec_03	2	3.98789	36879	899.858
MPro	161	176	YMHHMELPTGVHAGTD			14	1795.79	Mpro+PPACK	0.25	210407_M_P_15sec_03	3	3.99593	57722	600.214
MPro	161	176	YMHHMELPTGVHAGTD			14	1795.79	Mpro+PPACK	1	210407_M_P_60sec_01	2	3.989	14597	899.894
MPro	161	176	YMHHMELPTGVHAGTD			14	1795.79	Mpro+PPACK	1	210407_M_P_60sec_01	3	3.99518	31118	600.15
MPro	161	176	YMHHMELPTGVHAGTD			14	1795.79	Mpro+PPACK	1	210407_M_P_60sec_02	2	3.99268	42034	900.002
MPro	161	176	YMHHMELPTGVHAGTD			14	1795.79	Mpro+PPACK	1	210407_M_P_60sec_02	3	3.99956	74230	600.321
MPro	161	176	YMHHMELPTGVHAGTD			14	1795.79	Mpro+PPACK	1	210407_M_P_60sec_03	2	3.99077	30220	900.027
MPro	161	176	YMHHMELPTGVHAGTD			14	1795.79	Mpro+PPACK	1	210407_M_P_60sec_03	3	4.00041	62724	600.376
MPro	161	176	YMHHMELPTGVHAGTD			14	1795.79	Mpro+PPACK	5	210407_M_P_300sec_01	2	3.99145	24556	899.769
MPro	161	176	YMHHMELPTGVHAGTD			14	1795.79	Mpro+PPACK	5	210407_M_P_300sec_01	3	3.99713	31882	599.982
MPro	161	176	YMHHMELPTGVHAGTD			14	1795.79	Mpro+PPACK	5	210407_M_P_300sec_02	2	3.9861	61767	900.299
MPro	161	176	YMHHMELPTGVHAGTD			14	1795.79	Mpro+PPACK	5	210407_M_P_300sec_02	3	4.00031	88380	600.347
MPro	161	176	YMHHMELPTGVHAGTD			14	1795.79	Mpro+PPACK	5	210407_M_P_300sec_03	2	3.99117	40202	899.978
MPro	161	176	YMHHMELPTGVHAGTD			14	1795.79	Mpro+PPACK	5	210407_M_P_300sec_03	3	3.9939	68224	600.255
MPro	161	176	YMHHMELPTGVHAGTD			14	1795.79	Mpro+PPACK	30	210407_M_P_1800sec_01	2	3.98699	45419	900.154
MPro	161	176	YMHHMELPTGVHAGTD			14	1795.79	Mpro+PPACK	30	210407_M_P_1800sec_01	3	3.99487	70882	600.406
MPro	161	176	YMHHMELPTGVHAGTD			14	1795.79	Mpro+PPACK	30	210407_M_P_1800sec_02	2	3.99351	16856	900.362
MPro	161	176	YMHHMELPTGVHAGTD			14	1795.79	Mpro+PPACK	30	210407_M_P_1800sec_02	3	4.00143	36843	600.52
MPro	161	176	YMHHMELPTGVHAGTD			14	1795.79	Mpro+PPACK	30	210407_M_P_1800sec_03	2	3.99292	28764	900.204
MPro	161	176	YMHHMELPTGVHAGTD			14	1795.79	Mpro+PPACK	30	210407_M_P_1800sec_03	3	4.00212	49710	600.376
MPro	161	176	YMHHMELPTGVHAGTD			14	1795.79	Mpro+PPACK	120	210407_M_P_7200sec_01	2	3.98844	30829	900.426
MPro	161	176	YMHHMELPTGVHAGTD			14	1795.79	Mpro+PPACK	120	210407_M_P_7200sec_01	3	3.99481	41362	600.586
MPro	161	176	YMHHMELPTGVHAGTD			14	1795.79	Mpro+PPACK	120	210407_M_P_7200sec_02	2	3.99155	22206	900.619
MPro	161	176	YMHHMELPTGVHAGTD			14	1795.79	Mpro+PPACK	120	210407_M_P_7200sec_02	3	3.99485	48680	600.591
MPro	161	176	YMHHMELPTGVHAGTD			14	1795.79	Mpro+PPACK	120	210407_M_P_7200sec_03	2	3.99551	24133	900.191
MPro	161	176	YMHHMELPTGVHAGTD			14	1795.79	Mpro+PPACK	120	210407_M_P_7200sec_03	3	3.9995	62035	600.582
MPro	155	159	DCVSF			4	570.223	Mpro	0	DE-2021-04-07 M m0 2	1	4.85323	39626	570.433
MPro	155	159	DCVSF			4	570.223	Mpro	0	DE-2021-04-07 M m0 3	1	4.84524	59718	570.403
MPro	155	159	DCVSF			4	570.223	Mpro	0	DE-2021-04-07 M m0 4	1	4.83608	68510	570.415
MPro	155	159	DCVSF			4	570.223	Mpro	0.25	210407_M_15sec_01	1	4.83436	86592	570.459
MPro	155	159	DCVSF			4	570.223	Mpro	0.25	210407_M_15sec_02	1	4.84696	81868	570.503
MPro	155	159	DCVSF			4	570.223	Mpro	0.25	210407_M_15sec_03	1	4.83816	62593	570.482
MPro	155	159	DCVSF			4	570.223	Mpro	1	210407_M_60sec_01	1	4.83782	91799	570.469
MPro	155	159	DCVSF			4	570.223	Mpro	1	210407_M_60sec_02	1	4.83844	117743	570.492
MPro	155	159	DCVSF			4	570.223	Mpro	1	210407_M_60sec_03	1	4.83719	123082	570.475
MPro	155	159	DCVSF			4	570.223	Mpro	5	210407_M_300sec_01	1	4.83515	99357	570.486
MPro	155	159	DCVSF			4	570.223	Mpro	5	210407_M_300sec_02	1	4.83308	105835	570.483
MPro	155	159	DCVSF			4	570.223	Mpro	5	210407_M_300sec_03	1	4.8379	104465	570.491
MPro	155	159	DCVSF			4	570.223	Mpro	30	210407_M_1800sec_01	1	4.83338	91546	570.541
MPro	155	159	DCVSF			4	570.223	Mpro	30	210407_M_1800sec_02	1	4.83162	90454	570.591
MPro	155	159	DCVSF			4	570.223	Mpro	30	210407_M_1800sec_03	1	4.82999	101953	570.528
MPro	155	159	DCVSF			4	570.223	Mpro	120	210407_M_7200sec_01	1	4.83421	83378	570.624
MPro	155	159	DCVSF			4	570.223	Mpro	120	210407_M_7200sec_02	1	4.83154	80590	570.596
MPro	155	159	DCVSF			4	570.223	Mpro	120	210407_M_7200sec_03	1	4.83084	36665	570.633
MPro	155	159	DCVSF			4	570.223	Mpro+PPACK	0	DE-2021-04-07 M m0 2	1	4.85323	39626	570.433
MPro	155	159	DCVSF			4	570.223	Mpro+PPACK	0	DE-2021-04-07 M m0 3	1	4.84524	59718	570.403
MPro	155	159	DCVSF			4	570.223	Mpro+PPACK	0	DE-2021-04-07 M m0 4	1	4.83608	68510	570.415
MPro	155	159	DCVSF			4	570.223	Mpro+PPACK	0.25	210407_M_P_15sec_01	1	4.83868	58675	570.458
MPro	155	159	DCVSF			4	570.223	Mpro+PPACK	0.25	210407_M_P_15sec_02	1	5.0606	23814	570.485
MPro	155	159	DCVSF			4	570.223	Mpro+PPACK	0.25	210407_M_P_15sec_03	1	4.83652	57813	570.492
MPro	155	159	DCVSF			4	570.223	Mpro+PPACK	1	210407_M_P_60sec_01	1	4.83875	28010	570.507
MPro	155	159	DCVSF			4	570.223	Mpro+PPACK	1	210407_M_P_60sec_02	1	4.84065	62057	570.496
MPro	155	159	DCVSF			4	570.223	Mpro+PPACK	1	210407_M_P_60sec_03	1	4.83931	52071	570.532
MPro	155	159	DCVSF			4	570.223	Mpro+PPACK	5	210407_M_P_300sec_02	1	4.83798	62072	570.493
MPro	155	159	DCVSF			4	570.223	Mpro+PPACK	5	210407_M_P_300sec_03	1	4.83638	51031	570.474
MPro	155	159	DCVSF			4	570.223	Mpro+PPACK	30	210407_M_P_1800sec_01	1	4.83489	49877	570.589
MPro	155	159	DCVSF			4	570.223	Mpro+PPACK	30	210407_M_P_1800sec_02	1	4.8421	23624	570.506
MPro	155	159	DCVSF			4	570.223	Mpro+PPACK	30	210407_M_P_1800sec_03	1	4.84	33202	570.57
MPro	155	159	DCVSF			4	570.223	Mpro+PPACK	120	210407_M_P_7200sec_01	1	4.83863	31816	570.584
MPro	155	159	DCVSF			4	570.223	Mpro+PPACK	120	210407_M_P_7200sec_02	1	4.83424	29345	570.608
MPro	155	159	DCVSF			4	570.223	Mpro+PPACK	120	210407_M_P_7200sec_03	1	4.83761	30160	570.615
MPro	151	156	NIDYDC			5	742.271	Mpro	0	DE-2021-04-07 M m0 2	1	4.30916	151709	742.652
MPro	151	156	NIDYDC			5	742.271	Mpro	0	DE-2021-04-07 M m0 3	1	4.30417	232943	742.701
MPro	151	156	NIDYDC			5	742.271	Mpro	0	DE-2021-04-07 M m0 4	1	4.29289	290737	742.667
MPro	151	156	NIDYDC			5	742.271	Mpro	0.25	210407_M_15sec_01	1	4.29231	241514	744.405
MPro	151	156	NIDYDC			5	742.271	Mpro	0.25	210407_M_15sec_02	1	4.30393	231515	744.516
MPro	151	156	NIDYDC			5	742.271	Mpro	0.25	210407_M_15sec_03	1	4.29581	180403	744.501
MPro	151	156	NIDYDC			5	742.271	Mpro	1	210407_M_60sec_01	1	4.2924	262303	744.703
MPro	151	156	NIDYDC			5	742.271	Mpro	1	210407_M_60sec_02	1	4.29822	336089	744.567
MPro	151	156	NIDYDC			5	742.271	Mpro	1	210407_M_60sec_03	1	4.29393	342971	744.686
MPro	151	156	NIDYDC			5	742.271	Mpro	5	210407_M_300sec_01	1	4.29258	277329	744.73
MPro	151	156	NIDYDC			5	742.271	Mpro	5	210407_M_300sec_02	1	4.29301	296779	744.853
MPro	151	156	NIDYDC			5	742.271	Mpro	5	210407_M_300sec_03	1	4.29598	296860	744.75
MPro	151	156	NIDYDC			5	742.271	Mpro	30	210407_M_1800sec_01	1	4.29036	266223	744.9
MPro	151	156	NIDYDC			5	742.271	Mpro	30	210407_M_1800sec_02	1	4.2909	284665	744.948
MPro	151	156	NIDYDC			5	742.271	Mpro	30	210407_M_1800sec_03	1	4.28909	284053	745.026
MPro	151	156	NIDYDC			5	742.271	Mpro	120	210407_M_7200sec_01	1	4.29317	255655	744.909
MPro	151	156	NIDYDC			5	742.271	Mpro	120	210407_M_7200sec_02	1	4.28931	262953	744.935
MPro	151	156	NIDYDC			5	742.271	Mpro	120	210407_M_7200sec_03	1	4.28997	122865	744.826
MPro	151	156	NIDYDC			5	742.271	Mpro+PPACK	0	DE-2021-04-07 M m0 2	1	4.30916	151709	742.652
MPro	151	156	NIDYDC			5	742.271	Mpro+PPACK	0	DE-2021-04-07 M m0 3	1	4.30417	232943	742.701
MPro	151	156	NIDYDC			5	742.271	Mpro+PPACK	0	DE-2021-04-07 M m0 4	1	4.29289	290737	742.667
MPro	151	156	NIDYDC			5	742.271	Mpro+PPACK	0.25	210407_M_P_15sec_01	1	4.29415	98425	744.804
MPro	151	156	NIDYDC			5	742.271	Mpro+PPACK	0.25	210407_M_P_15sec_02	1	4.29547	92794	744.892
MPro	151	156	NIDYDC			5	742.271	Mpro+PPACK	0.25	210407_M_P_15sec_03	1	4.29597	50870	744.786
MPro	151	156	NIDYDC			5	742.271	Mpro+PPACK	1	210407_M_P_60sec_01	1	4.29765	37048	744.822
MPro	151	156	NIDYDC			5	742.271	Mpro+PPACK	1	210407_M_P_60sec_02	1	4.29638	59279	744.917
MPro	151	156	NIDYDC			5	742.271	Mpro+PPACK	1	210407_M_P_60sec_03	1	4.30006	46737	744.847
MPro	151	156	NIDYDC			5	742.271	Mpro+PPACK	5	210407_M_P_300sec_02	1	4.29625	31606	744.57
MPro	151	156	NIDYDC			5	742.271	Mpro+PPACK	5	210407_M_P_300sec_03	1	4.29488	26185	745.018
MPro	151	156	NIDYDC			5	742.271	Mpro+PPACK	30	210407_M_P_1800sec_01	1	4.28988	41204	744.701
MPro	151	156	NIDYDC			5	742.271	Mpro+PPACK	30	210407_M_P_1800sec_02	1	4.29514	23993	744.728
MPro	151	156	NIDYDC			5	742.271	Mpro+PPACK	120	210407_M_P_7200sec_01	1	4.29369	15257	744.724
MPro	151	156	NIDYDC			5	742.271	Mpro+PPACK	120	210407_M_P_7200sec_02	1	4.28681	11587	744.745
MPro	151	156	NIDYDC			5	742.271	Mpro+PPACK	120	210407_M_P_7200sec_03	1	4.29526	13073	744.771
MPro	151	154	NIDY			3	524.235	Mpro	0	DE-2021-04-07 M m0 2	1	4.11424	67553	524.417
MPro	151	154	NIDY			3	524.235	Mpro	0	DE-2021-04-07 M m0 3	1	4.10817	99083	524.412
MPro	151	154	NIDY			3	524.235	Mpro	0	DE-2021-04-07 M m0 4	1	4.09774	137589	524.488
MPro	151	154	NIDY			3	524.235	Mpro	0.25	210407_M_15sec_01	1	4.09684	123178	525.346
MPro	151	154	NIDY			3	524.235	Mpro	0.25	210407_M_15sec_02	1	4.10667	110567	525.372
MPro	151	154	NIDY			3	524.235	Mpro	0.25	210407_M_15sec_03	1	4.09827	67851	525.512
MPro	151	154	NIDY			3	524.235	Mpro	1	210407_M_60sec_01	1	4.09729	113869	525.38
MPro	151	154	NIDY			3	524.235	Mpro	1	210407_M_60sec_02	1	4.10163	171562	525.41
MPro	151	154	NIDY			3	524.235	Mpro	1	210407_M_60sec_03	1	4.09687	168936	525.397
MPro	151	154	NIDY			3	524.235	Mpro	5	210407_M_300sec_01	1	4.09724	144163	525.492
MPro	151	154	NIDY			3	524.235	Mpro	5	210407_M_300sec_02	1	4.09627	151844	525.552
MPro	151	154	NIDY			3	524.235	Mpro	5	210407_M_300sec_03	1	4.0988	155568	525.578
MPro	151	154	NIDY			3	524.235	Mpro	30	210407_M_1800sec_01	1	4.09478	138484	525.684
MPro	151	154	NIDY			3	524.235	Mpro	30	210407_M_1800sec_02	1	4.09335	136789	525.678
MPro	151	154	NIDY			3	524.235	Mpro	30	210407_M_1800sec_03	1	4.0922	137544	525.695
MPro	151	154	NIDY			3	524.235	Mpro	120	210407_M_7200sec_01	1	4.0964	134194	525.691
MPro	151	154	NIDY			3	524.235	Mpro	120	210407_M_7200sec_02	1	4.09653	126882	525.674
MPro	151	154	NIDY			3	524.235	Mpro	120	210407_M_7200sec_03	1	4.09519	46003	525.711
MPro	151	154	NIDY			3	524.235	Mpro+PPACK	0	DE-2021-04-07 M m0 2	1	4.11424	67553	524.417
MPro	151	154	NIDY			3	524.235	Mpro+PPACK	0	DE-2021-04-07 M m0 3	1	4.10817	99083	524.412
MPro	151	154	NIDY			3	524.235	Mpro+PPACK	0	DE-2021-04-07 M m0 4	1	4.09774	137589	524.488
MPro	151	154	NIDY			3	524.235	Mpro+PPACK	0.25	210407_M_P_15sec_01	1	4.09751	69931	525.582
MPro	151	154	NIDY			3	524.235	Mpro+PPACK	0.25	210407_M_P_15sec_02	1	4.09733	70154	525.583
MPro	151	154	NIDY			3	524.235	Mpro+PPACK	0.25	210407_M_P_15sec_03	1	4.09657	64684	525.602
MPro	151	154	NIDY			3	524.235	Mpro+PPACK	1	210407_M_P_60sec_01	1	4.09968	23714	525.712
MPro	151	154	NIDY			3	524.235	Mpro+PPACK	1	210407_M_P_60sec_02	1	4.09796	71699	525.729
MPro	151	154	NIDY			3	524.235	Mpro+PPACK	1	210407_M_P_60sec_03	1	4.09699	58956	525.735
MPro	151	154	NIDY			3	524.235	Mpro+PPACK	5	210407_M_P_300sec_01	1	4.09026	33162	525.662
MPro	151	154	NIDY			3	524.235	Mpro+PPACK	5	210407_M_P_300sec_02	1	4.098	70036	525.644
MPro	151	154	NIDY			3	524.235	Mpro+PPACK	5	210407_M_P_300sec_03	1	4.09436	45397	525.682
MPro	151	154	NIDY			3	524.235	Mpro+PPACK	30	210407_M_P_1800sec_01	1	4.09215	65283	525.611
MPro	151	154	NIDY			3	524.235	Mpro+PPACK	30	210407_M_P_1800sec_02	1	4.09777	25438	525.668
MPro	151	154	NIDY			3	524.235	Mpro+PPACK	30	210407_M_P_1800sec_03	1	4.10309	30364	525.715
MPro	151	154	NIDY			3	524.235	Mpro+PPACK	120	210407_M_P_7200sec_03	1	4.09285	34502	525.683
MPro	141	150	LNGSCGSVGF			9	940.419	Mpro	0	DE-2021-04-07 M m0 2	1	5.01042	62591	940.893
MPro	141	150	LNGSCGSVGF			9	940.419	Mpro	0	DE-2021-04-07 M m0 2	2	5.013	57381	470.966
MPro	141	150	LNGSCGSVGF			9	940.419	Mpro	0	DE-2021-04-07 M m0 3	1	5.00399	90729	940.93
MPro	141	150	LNGSCGSVGF			9	940.419	Mpro	0	DE-2021-04-07 M m0 3	2	5.00891	74922	470.955
MPro	141	150	LNGSCGSVGF			9	940.419	Mpro	0	DE-2021-04-07 M m0 4	1	4.99913	118353	940.997
MPro	141	150	LNGSCGSVGF			9	940.419	Mpro	0	DE-2021-04-07 M m0 4	2	5.00032	92651	470.965
MPro	141	150	LNGSCGSVGF			9	940.419	Mpro	0.25	210407_M_15sec_01	1	4.99779	118660	942.449
MPro	141	150	LNGSCGSVGF			9	940.419	Mpro	0.25	210407_M_15sec_01	2	5.00096	83872	471.417
MPro	141	150	LNGSCGSVGF			9	940.419	Mpro	0.25	210407_M_15sec_02	1	5.00679	112555	942.454
MPro	141	150	LNGSCGSVGF			9	940.419	Mpro	0.25	210407_M_15sec_02	2	5.0102	88654	471.464
MPro	141	150	LNGSCGSVGF			9	940.419	Mpro	0.25	210407_M_15sec_03	1	4.99833	79635	942.554
MPro	141	150	LNGSCGSVGF			9	940.419	Mpro	0.25	210407_M_15sec_03	2	5.00166	65934	471.41
MPro	141	150	LNGSCGSVGF			9	940.419	Mpro	1	210407_M_60sec_01	1	4.99585	112003	942.647
MPro	141	150	LNGSCGSVGF			9	940.419	Mpro	1	210407_M_60sec_01	2	4.99894	90407	471.542
MPro	141	150	LNGSCGSVGF			9	940.419	Mpro	1	210407_M_60sec_02	1	4.9967	176104	942.61
MPro	141	150	LNGSCGSVGF			9	940.419	Mpro	1	210407_M_60sec_02	2	5.00083	114568	471.529
MPro	141	150	LNGSCGSVGF			9	940.419	Mpro	1	210407_M_60sec_03	1	4.99464	163016	942.514
MPro	141	150	LNGSCGSVGF			9	940.419	Mpro	1	210407_M_60sec_03	2	4.99728	117306	471.535
MPro	141	150	LNGSCGSVGF			9	940.419	Mpro	5	210407_M_300sec_01	1	4.99422	129288	942.514
MPro	141	150	LNGSCGSVGF			9	940.419	Mpro	5	210407_M_300sec_01	2	4.99762	105366	471.486
MPro	141	150	LNGSCGSVGF			9	940.419	Mpro	5	210407_M_300sec_02	1	4.9933	139225	942.498
MPro	141	150	LNGSCGSVGF			9	940.419	Mpro	5	210407_M_300sec_02	2	4.99767	107003	471.494
MPro	141	150	LNGSCGSVGF			9	940.419	Mpro	5	210407_M_300sec_03	1	5	141119	942.58
MPro	141	150	LNGSCGSVGF			9	940.419	Mpro	5	210407_M_300sec_03	2	5.00183	101640	471.472
MPro	141	150	LNGSCGSVGF			9	940.419	Mpro	30	210407_M_1800sec_01	1	4.99336	118818	942.701
MPro	141	150	LNGSCGSVGF			9	940.419	Mpro	30	210407_M_1800sec_01	2	4.99614	91254	471.506
MPro	141	150	LNGSCGSVGF			9	940.419	Mpro	30	210407_M_1800sec_02	1	4.99151	127691	942.566
MPro	141	150	LNGSCGSVGF			9	940.419	Mpro	30	210407_M_1800sec_02	2	4.99965	98019	471.489
MPro	141	150	LNGSCGSVGF			9	940.419	Mpro	30	210407_M_1800sec_03	1	4.99107	123832	942.545
MPro	141	150	LNGSCGSVGF			9	940.419	Mpro	30	210407_M_1800sec_03	2	4.99481	99647	471.539
MPro	141	150	LNGSCGSVGF			9	940.419	Mpro	120	210407_M_7200sec_01	1	4.99268	104021	942.78
MPro	141	150	LNGSCGSVGF			9	940.419	Mpro	120	210407_M_7200sec_01	2	4.99739	90251	471.576
MPro	141	150	LNGSCGSVGF			9	940.419	Mpro	120	210407_M_7200sec_02	1	4.99306	110941	942.773
MPro	141	150	LNGSCGSVGF			9	940.419	Mpro	120	210407_M_7200sec_02	2	4.9964	85101	471.595
MPro	141	150	LNGSCGSVGF			9	940.419	Mpro	120	210407_M_7200sec_03	1	4.99463	44458	942.525
MPro	141	150	LNGSCGSVGF			9	940.419	Mpro	120	210407_M_7200sec_03	2	4.99781	42321	471.443
MPro	141	150	LNGSCGSVGF			9	940.419	Mpro+PPACK	0	DE-2021-04-07 M m0 2	1	5.01042	62591	940.893
MPro	141	150	LNGSCGSVGF			9	940.419	Mpro+PPACK	0	DE-2021-04-07 M m0 2	2	5.013	57381	470.966
MPro	141	150	LNGSCGSVGF			9	940.419	Mpro+PPACK	0	DE-2021-04-07 M m0 3	1	5.00399	90729	940.93
MPro	141	150	LNGSCGSVGF			9	940.419	Mpro+PPACK	0	DE-2021-04-07 M m0 3	2	5.00891	74922	470.955
MPro	141	150	LNGSCGSVGF			9	940.419	Mpro+PPACK	0	DE-2021-04-07 M m0 4	1	4.99913	118353	940.997
MPro	141	150	LNGSCGSVGF			9	940.419	Mpro+PPACK	0	DE-2021-04-07 M m0 4	2	5.00032	92651	470.965
MPro	142	150	NGSCGSVGF			8	827.335	Mpro	0	DE-2021-04-07 M m0 2	1	4.73534	97991	827.775
MPro	142	150	NGSCGSVGF			8	827.335	Mpro	0	DE-2021-04-07 M m0 3	1	4.73034	148606	827.824
MPro	142	150	NGSCGSVGF			8	827.335	Mpro	0	DE-2021-04-07 M m0 3	2	4.73229	31165	414.328
MPro	142	150	NGSCGSVGF			8	827.335	Mpro	0	DE-2021-04-07 M m0 4	1	4.72363	187757	827.809
MPro	142	150	NGSCGSVGF			8	827.335	Mpro	0	DE-2021-04-07 M m0 4	2	4.72297	37713	414.318
MPro	142	150	NGSCGSVGF			8	827.335	Mpro	0.25	210407_M_15sec_01	1	4.72093	180886	828.723
MPro	142	150	NGSCGSVGF			8	827.335	Mpro	0.25	210407_M_15sec_01	2	4.7229	36783	414.674
MPro	142	150	NGSCGSVGF			8	827.335	Mpro	0.25	210407_M_15sec_02	1	4.73311	171317	828.736
MPro	142	150	NGSCGSVGF			8	827.335	Mpro	0.25	210407_M_15sec_02	2	4.7362	33146	414.631
MPro	142	150	NGSCGSVGF			8	827.335	Mpro	0.25	210407_M_15sec_03	1	4.72499	127518	828.755
MPro	142	150	NGSCGSVGF			8	827.335	Mpro	0.25	210407_M_15sec_03	2	4.72619	31195	414.669
MPro	142	150	NGSCGSVGF			8	827.335	Mpro	1	210407_M_60sec_01	1	4.721	184998	828.837
MPro	142	150	NGSCGSVGF			8	827.335	Mpro	1	210407_M_60sec_01	2	4.72424	37191	414.702
MPro	142	150	NGSCGSVGF			8	827.335	Mpro	1	210407_M_60sec_02	1	4.72445	252933	828.911
MPro	142	150	NGSCGSVGF			8	827.335	Mpro	1	210407_M_60sec_02	2	4.72917	55446	414.807
MPro	142	150	NGSCGSVGF			8	827.335	Mpro	1	210407_M_60sec_03	1	4.72175	250165	828.886
MPro	142	150	NGSCGSVGF			8	827.335	Mpro	1	210407_M_60sec_03	2	4.72106	54109	414.776
MPro	142	150	NGSCGSVGF			8	827.335	Mpro	5	210407_M_300sec_01	1	4.72125	193655	828.814
MPro	142	150	NGSCGSVGF			8	827.335	Mpro	5	210407_M_300sec_01	2	4.72178	36955	414.667
MPro	142	150	NGSCGSVGF			8	827.335	Mpro	5	210407_M_300sec_02	1	4.72116	210327	828.771
MPro	142	150	NGSCGSVGF			8	827.335	Mpro	5	210407_M_300sec_02	2	4.72281	50378	414.803
MPro	142	150	NGSCGSVGF			8	827.335	Mpro	5	210407_M_300sec_03	1	4.72401	219792	828.865
MPro	142	150	NGSCGSVGF			8	827.335	Mpro	5	210407_M_300sec_03	2	4.72533	48657	414.803
MPro	142	150	NGSCGSVGF			8	827.335	Mpro	30	210407_M_1800sec_01	1	4.71769	185865	828.904
MPro	142	150	NGSCGSVGF			8	827.335	Mpro	30	210407_M_1800sec_01	2	4.7239	40660	414.66
MPro	142	150	NGSCGSVGF			8	827.335	Mpro	30	210407_M_1800sec_02	1	4.71925	195724	828.876
MPro	142	150	NGSCGSVGF			8	827.335	Mpro	30	210407_M_1800sec_02	2	4.72244	40819	414.657
MPro	142	150	NGSCGSVGF			8	827.335	Mpro	30	210407_M_1800sec_03	1	4.71928	175618	828.897
MPro	142	150	NGSCGSVGF			8	827.335	Mpro	30	210407_M_1800sec_03	2	4.71933	35455	414.675
MPro	142	150	NGSCGSVGF			8	827.335	Mpro	120	210407_M_7200sec_01	1	4.72227	164957	829.194
MPro	142	150	NGSCGSVGF			8	827.335	Mpro	120	210407_M_7200sec_01	2	4.72278	33541	414.725
MPro	142	150	NGSCGSVGF			8	827.335	Mpro	120	210407_M_7200sec_02	1	4.72091	164354	829.228
MPro	142	150	NGSCGSVGF			8	827.335	Mpro	120	210407_M_7200sec_02	2	4.72083	33212	414.722
MPro	142	150	NGSCGSVGF			8	827.335	Mpro	120	210407_M_7200sec_03	1	4.71868	75332	829.043
MPro	142	150	NGSCGSVGF			8	827.335	Mpro	120	210407_M_7200sec_03	2	4.7126	12338	414.916
MPro	142	150	NGSCGSVGF			8	827.335	Mpro+PPACK	0	DE-2021-04-07 M m0 2	1	4.73534	97991	827.775
MPro	142	150	NGSCGSVGF			8	827.335	Mpro+PPACK	0	DE-2021-04-07 M m0 3	1	4.73034	148606	827.824
MPro	142	150	NGSCGSVGF			8	827.335	Mpro+PPACK	0	DE-2021-04-07 M m0 3	2	4.73229	31165	414.328
MPro	142	150	NGSCGSVGF			8	827.335	Mpro+PPACK	0	DE-2021-04-07 M m0 4	1	4.72363	187757	827.809
MPro	142	150	NGSCGSVGF			8	827.335	Mpro+PPACK	0	DE-2021-04-07 M m0 4	2	4.72297	37713	414.318
MPro	135	141	TIKGSFL			6	765.451	Mpro	0	DE-2021-04-07 M m0 2	1	4.85912	110046	765.835
MPro	135	141	TIKGSFL			6	765.451	Mpro	0	DE-2021-04-07 M m0 2	2	4.85826	302717	383.405
MPro	135	141	TIKGSFL			6	765.451	Mpro	0	DE-2021-04-07 M m0 3	1	4.85091	172860	765.817
MPro	135	141	TIKGSFL			6	765.451	Mpro	0	DE-2021-04-07 M m0 3	2	4.85096	460782	383.401
MPro	135	141	TIKGSFL			6	765.451	Mpro	0	DE-2021-04-07 M m0 4	1	4.84941	209222	765.828
MPro	135	141	TIKGSFL			6	765.451	Mpro	0	DE-2021-04-07 M m0 4	2	4.84856	600728	383.411
MPro	135	141	TIKGSFL			6	765.451	Mpro	0.25	210407_M_15sec_01	1	4.84692	199660	767.449
MPro	135	141	TIKGSFL			6	765.451	Mpro	0.25	210407_M_15sec_01	2	4.84654	483533	384.24
MPro	135	141	TIKGSFL			6	765.451	Mpro	0.25	210407_M_15sec_02	1	4.85824	186525	767.575
MPro	135	141	TIKGSFL			6	765.451	Mpro	0.25	210407_M_15sec_02	2	4.8577	478315	384.294
MPro	135	141	TIKGSFL			6	765.451	Mpro	0.25	210407_M_15sec_03	1	4.85113	123971	767.473
MPro	135	141	TIKGSFL			6	765.451	Mpro	0.25	210407_M_15sec_03	2	4.85334	328232	384.311
MPro	135	141	TIKGSFL			6	765.451	Mpro	1	210407_M_60sec_01	1	4.84706	214710	768.351
MPro	135	141	TIKGSFL			6	765.451	Mpro	1	210407_M_60sec_01	2	4.8477	517524	384.681
MPro	135	141	TIKGSFL			6	765.451	Mpro	1	210407_M_60sec_02	1	4.84748	275522	768.311
MPro	135	141	TIKGSFL			6	765.451	Mpro	1	210407_M_60sec_02	2	4.84695	693400	384.667
MPro	135	141	TIKGSFL			6	765.451	Mpro	1	210407_M_60sec_03	1	4.84707	278574	768.309
MPro	135	141	TIKGSFL			6	765.451	Mpro	1	210407_M_60sec_03	2	4.8464	690625	384.668
MPro	135	141	TIKGSFL			6	765.451	Mpro	5	210407_M_300sec_01	1	4.84636	215476	768.582
MPro	135	141	TIKGSFL			6	765.451	Mpro	5	210407_M_300sec_01	2	4.84597	586245	384.798
MPro	135	141	TIKGSFL			6	765.451	Mpro	5	210407_M_300sec_02	1	4.84413	242207	768.506
MPro	135	141	TIKGSFL			6	765.451	Mpro	5	210407_M_300sec_02	2	4.84495	642406	384.816
MPro	135	141	TIKGSFL			6	765.451	Mpro	5	210407_M_300sec_03	1	4.8482	246987	768.604
MPro	135	141	TIKGSFL			6	765.451	Mpro	5	210407_M_300sec_03	2	4.84776	629938	384.809
MPro	135	141	TIKGSFL			6	765.451	Mpro	30	210407_M_1800sec_01	1	4.84466	212614	768.942
MPro	135	141	TIKGSFL			6	765.451	Mpro	30	210407_M_1800sec_01	2	4.84427	575637	384.984
MPro	135	141	TIKGSFL			6	765.451	Mpro	30	210407_M_1800sec_02	1	4.84331	202728	769.145
MPro	135	141	TIKGSFL			6	765.451	Mpro	30	210407_M_1800sec_02	2	4.84359	599107	384.984
MPro	135	141	TIKGSFL			6	765.451	Mpro	30	210407_M_1800sec_03	1	4.84133	236479	768.859
MPro	135	141	TIKGSFL			6	765.451	Mpro	30	210407_M_1800sec_03	2	4.84099	644600	384.977
MPro	135	141	TIKGSFL			6	765.451	Mpro	120	210407_M_7200sec_01	1	4.84434	181288	768.994
MPro	135	141	TIKGSFL			6	765.451	Mpro	120	210407_M_7200sec_01	2	4.84405	565166	385.001
MPro	135	141	TIKGSFL			6	765.451	Mpro	120	210407_M_7200sec_02	1	4.8424	198144	769.009
MPro	135	141	TIKGSFL			6	765.451	Mpro	120	210407_M_7200sec_02	2	4.84269	585491	385.013
MPro	135	141	TIKGSFL			6	765.451	Mpro	120	210407_M_7200sec_03	1	4.84195	73791	768.795
MPro	135	141	TIKGSFL			6	765.451	Mpro	120	210407_M_7200sec_03	2	4.84378	231959	384.846
MPro	135	141	TIKGSFL			6	765.451	Mpro+PPACK	0	DE-2021-04-07 M m0 2	1	4.85912	110046	765.835
MPro	135	141	TIKGSFL			6	765.451	Mpro+PPACK	0	DE-2021-04-07 M m0 2	2	4.85826	302717	383.405
MPro	135	141	TIKGSFL			6	765.451	Mpro+PPACK	0	DE-2021-04-07 M m0 3	1	4.85091	172860	765.817
MPro	135	141	TIKGSFL			6	765.451	Mpro+PPACK	0	DE-2021-04-07 M m0 3	2	4.85096	460782	383.401
MPro	135	141	TIKGSFL			6	765.451	Mpro+PPACK	0	DE-2021-04-07 M m0 4	1	4.84941	209222	765.828
MPro	135	141	TIKGSFL			6	765.451	Mpro+PPACK	0	DE-2021-04-07 M m0 4	2	4.84856	600728	383.411
MPro	135	141	TIKGSFL			6	765.451	Mpro+PPACK	0.25	210407_M_P_15sec_01	1	4.85128	108898	768.447
MPro	135	141	TIKGSFL			6	765.451	Mpro+PPACK	0.25	210407_M_P_15sec_01	2	4.8534	288594	384.705
MPro	135	141	TIKGSFL			6	765.451	Mpro+PPACK	0.25	210407_M_P_15sec_02	1	4.84948	106690	768.477
MPro	135	141	TIKGSFL			6	765.451	Mpro+PPACK	0.25	210407_M_P_15sec_02	2	4.85156	279851	384.765
MPro	135	141	TIKGSFL			6	765.451	Mpro+PPACK	0.25	210407_M_P_15sec_03	1	4.85062	96741	768.469
MPro	135	141	TIKGSFL			6	765.451	Mpro+PPACK	0.25	210407_M_P_15sec_03	2	4.85288	271755	384.716
MPro	135	141	TIKGSFL			6	765.451	Mpro+PPACK	1	210407_M_P_60sec_01	1	4.85461	40645	768.955
MPro	135	141	TIKGSFL			6	765.451	Mpro+PPACK	1	210407_M_P_60sec_01	2	4.85263	106878	384.877
MPro	135	141	TIKGSFL			6	765.451	Mpro+PPACK	1	210407_M_P_60sec_02	1	4.84962	84047	768.646
MPro	135	141	TIKGSFL			6	765.451	Mpro+PPACK	1	210407_M_P_60sec_02	2	4.85003	295134	384.951
MPro	135	141	TIKGSFL			6	765.451	Mpro+PPACK	1	210407_M_P_60sec_03	1	4.85571	84174	768.961
MPro	135	141	TIKGSFL			6	765.451	Mpro+PPACK	1	210407_M_P_60sec_03	2	4.85424	215747	384.934
MPro	135	141	TIKGSFL			6	765.451	Mpro+PPACK	5	210407_M_P_300sec_01	1	4.84764	53202	768.761
MPro	135	141	TIKGSFL			6	765.451	Mpro+PPACK	5	210407_M_P_300sec_01	2	4.84668	170594	384.664
MPro	135	141	TIKGSFL			6	765.451	Mpro+PPACK	5	210407_M_P_300sec_02	1	4.85144	78092	768.607
MPro	135	141	TIKGSFL			6	765.451	Mpro+PPACK	5	210407_M_P_300sec_02	2	4.84902	269070	384.92
MPro	135	141	TIKGSFL			6	765.451	Mpro+PPACK	5	210407_M_P_300sec_03	1	4.84852	102088	768.71
MPro	135	141	TIKGSFL			6	765.451	Mpro+PPACK	5	210407_M_P_300sec_03	2	4.84707	242468	384.896
MPro	135	141	TIKGSFL			6	765.451	Mpro+PPACK	30	210407_M_P_1800sec_01	1	4.8457	77936	768.891
MPro	135	141	TIKGSFL			6	765.451	Mpro+PPACK	30	210407_M_P_1800sec_01	2	4.8454	257155	384.828
MPro	135	141	TIKGSFL			6	765.451	Mpro+PPACK	30	210407_M_P_1800sec_02	1	4.85191	47219	768.55
MPro	135	141	TIKGSFL			6	765.451	Mpro+PPACK	30	210407_M_P_1800sec_02	2	4.85079	125910	384.825
MPro	135	141	TIKGSFL			6	765.451	Mpro+PPACK	30	210407_M_P_1800sec_03	1	4.8495	44517	768.328
MPro	135	141	TIKGSFL			6	765.451	Mpro+PPACK	30	210407_M_P_1800sec_03	2	4.85018	169619	384.669
MPro	135	141	TIKGSFL			6	765.451	Mpro+PPACK	120	210407_M_P_7200sec_01	1	4.85066	61180	768.536
MPro	135	141	TIKGSFL			6	765.451	Mpro+PPACK	120	210407_M_P_7200sec_01	2	4.84747	174826	384.778
MPro	135	141	TIKGSFL			6	765.451	Mpro+PPACK	120	210407_M_P_7200sec_02	1	4.84219	40604	768.623
MPro	135	141	TIKGSFL			6	765.451	Mpro+PPACK	120	210407_M_P_7200sec_02	2	4.84204	158004	384.69
MPro	135	141	TIKGSFL			6	765.451	Mpro+PPACK	120	210407_M_P_7200sec_03	1	4.84829	55528	768.624
MPro	135	141	TIKGSFL			6	765.451	Mpro+PPACK	120	210407_M_P_7200sec_03	2	4.84926	184663	384.852
MPro	135	140	TIKGSF			5	652.366	Mpro	0	DE-2021-04-07 M m0 2	2	3.7536	104422	326.797
MPro	135	140	TIKGSF			5	652.366	Mpro	0	DE-2021-04-07 M m0 3	2	3.74639	156459	326.854
MPro	135	140	TIKGSF			5	652.366	Mpro	0	DE-2021-04-07 M m0 4	2	3.73801	195352	326.836
MPro	135	140	TIKGSF			5	652.366	Mpro	0.25	210407_M_15sec_01	2	3.73709	167536	327.558
MPro	135	140	TIKGSF			5	652.366	Mpro	0.25	210407_M_15sec_02	2	3.74948	148880	327.601
MPro	135	140	TIKGSF			5	652.366	Mpro	0.25	210407_M_15sec_03	2	3.74143	121011	327.616
MPro	135	140	TIKGSF			5	652.366	Mpro	1	210407_M_60sec_01	2	3.73323	163361	327.857
MPro	135	140	TIKGSF			5	652.366	Mpro	1	210407_M_60sec_02	2	3.74246	234960	327.866
MPro	135	140	TIKGSF			5	652.366	Mpro	1	210407_M_60sec_03	2	3.73695	222939	327.831
MPro	135	140	TIKGSF			5	652.366	Mpro	5	210407_M_300sec_01	2	3.73473	205967	327.928
MPro	135	140	TIKGSF			5	652.366	Mpro	5	210407_M_300sec_02	2	3.73828	193749	327.876
MPro	135	140	TIKGSF			5	652.366	Mpro	5	210407_M_300sec_03	2	3.73835	192081	327.869
MPro	135	140	TIKGSF			5	652.366	Mpro	30	210407_M_1800sec_01	2	3.73266	177006	328.094
MPro	135	140	TIKGSF			5	652.366	Mpro	30	210407_M_1800sec_02	2	3.73322	190271	328.089
MPro	135	140	TIKGSF			5	652.366	Mpro	30	210407_M_1800sec_03	2	3.72876	197398	328.116
MPro	135	140	TIKGSF			5	652.366	Mpro	120	210407_M_7200sec_01	2	3.73079	180001	328.149
MPro	135	140	TIKGSF			5	652.366	Mpro	120	210407_M_7200sec_02	2	3.73224	180793	328.192
MPro	135	140	TIKGSF			5	652.366	Mpro	120	210407_M_7200sec_03	2	3.73533	73208	328.053
MPro	135	140	TIKGSF			5	652.366	Mpro+PPACK	0	DE-2021-04-07 M m0 2	2	3.7536	104422	326.797
MPro	135	140	TIKGSF			5	652.366	Mpro+PPACK	0	DE-2021-04-07 M m0 3	2	3.74639	156459	326.854
MPro	135	140	TIKGSF			5	652.366	Mpro+PPACK	0	DE-2021-04-07 M m0 4	2	3.73801	195352	326.836
MPro	135	140	TIKGSF			5	652.366	Mpro+PPACK	0.25	210407_M_P_15sec_01	2	3.69091	62667	328.022
MPro	135	140	TIKGSF			5	652.366	Mpro+PPACK	0.25	210407_M_P_15sec_02	2	3.67736	62712	327.909
MPro	135	140	TIKGSF			5	652.366	Mpro+PPACK	0.25	210407_M_P_15sec_03	2	3.68673	58695	328.031
MPro	135	140	TIKGSF			5	652.366	Mpro+PPACK	1	210407_M_P_60sec_03	2	3.67419	40416	328.152
MPro	135	140	TIKGSF			5	652.366	Mpro+PPACK	5	210407_M_P_300sec_02	2	3.67242	46275	328.154
MPro	135	140	TIKGSF			5	652.366	Mpro+PPACK	30	210407_M_P_1800sec_01	2	3.67815	43574	328.145
MPro	135	140	TIKGSF			5	652.366	Mpro+PPACK	30	210407_M_P_1800sec_03	2	3.68583	31117	328.121
MPro	135	140	TIKGSF			5	652.366	Mpro+PPACK	120	210407_M_P_7200sec_01	2	3.6934	36310	328.114
MPro	135	140	TIKGSF			5	652.366	Mpro+PPACK	120	210407_M_P_7200sec_02	2	3.7012	32744	328.139
MPro	135	140	TIKGSF			5	652.366	Mpro+PPACK	120	210407_M_P_7200sec_03	2	3.6964	35024	328.134
MPro	129	134	AMRPNF			4	735.361	Mpro	0	DE-2021-04-07 M m0 2	2	4.08901	83908	368.375
MPro	129	134	AMRPNF			4	735.361	Mpro	0	DE-2021-04-07 M m0 3	2	4.08202	115358	368.383
MPro	129	134	AMRPNF			4	735.361	Mpro	0	DE-2021-04-07 M m0 4	2	4.07405	145228	368.376
MPro	129	134	AMRPNF			4	735.361	Mpro	0.25	210407_M_15sec_01	2	4.07421	129465	368.464
MPro	129	134	AMRPNF			4	735.361	Mpro	0.25	210407_M_15sec_02	2	4.08562	125508	368.485
MPro	129	134	AMRPNF			4	735.361	Mpro	0.25	210407_M_15sec_03	2	4.07671	99718	368.468
MPro	129	134	AMRPNF			4	735.361	Mpro	1	210407_M_60sec_01	2	4.07472	129609	368.519
MPro	129	134	AMRPNF			4	735.361	Mpro	1	210407_M_60sec_02	2	4.07784	177758	368.51
MPro	129	134	AMRPNF			4	735.361	Mpro	1	210407_M_60sec_03	2	4.0753	187731	368.505
MPro	129	134	AMRPNF			4	735.361	Mpro	5	210407_M_300sec_01	2	4.07291	156215	368.566
MPro	129	134	AMRPNF			4	735.361	Mpro	5	210407_M_300sec_02	2	4.07149	193101	368.668
MPro	129	134	AMRPNF			4	735.361	Mpro	5	210407_M_300sec_03	2	4.07705	168942	368.657
MPro	129	134	AMRPNF			4	735.361	Mpro	30	210407_M_1800sec_01	2	4.07044	169468	368.778
MPro	129	134	AMRPNF			4	735.361	Mpro	30	210407_M_1800sec_02	2	4.07176	151782	368.747
MPro	129	134	AMRPNF			4	735.361	Mpro	30	210407_M_1800sec_03	2	4.07221	157079	368.783
MPro	129	134	AMRPNF			4	735.361	Mpro	120	210407_M_7200sec_01	2	4.07498	143162	368.796
MPro	129	134	AMRPNF			4	735.361	Mpro	120	210407_M_7200sec_02	2	4.07107	146691	368.767
MPro	129	134	AMRPNF			4	735.361	Mpro	120	210407_M_7200sec_03	2	4.07161	67848	368.779
MPro	129	134	AMRPNF			4	735.361	Mpro+PPACK	0	DE-2021-04-07 M m0 2	2	4.08901	83908	368.375
MPro	129	134	AMRPNF			4	735.361	Mpro+PPACK	0	DE-2021-04-07 M m0 3	2	4.08202	115358	368.383
MPro	129	134	AMRPNF			4	735.361	Mpro+PPACK	0	DE-2021-04-07 M m0 4	2	4.07405	145228	368.376
MPro	129	134	AMRPNF			4	735.361	Mpro+PPACK	0.25	210407_M_P_15sec_01	2	4.07684	78838	368.728
MPro	129	134	AMRPNF			4	735.361	Mpro+PPACK	0.25	210407_M_P_15sec_02	2	4.07632	67117	368.693
MPro	129	134	AMRPNF			4	735.361	Mpro+PPACK	0.25	210407_M_P_15sec_03	2	4.07634	64647	368.675
MPro	129	134	AMRPNF			4	735.361	Mpro+PPACK	1	210407_M_P_60sec_01	2	4.07746	34073	368.714
MPro	129	134	AMRPNF			4	735.361	Mpro+PPACK	1	210407_M_P_60sec_02	2	4.07556	72302	368.794
MPro	129	134	AMRPNF			4	735.361	Mpro+PPACK	1	210407_M_P_60sec_03	2	4.07832	51981	368.699
MPro	129	134	AMRPNF			4	735.361	Mpro+PPACK	5	210407_M_P_300sec_01	2	4.07143	45405	368.6
MPro	129	134	AMRPNF			4	735.361	Mpro+PPACK	5	210407_M_P_300sec_02	2	4.07795	74033	368.765
MPro	129	134	AMRPNF			4	735.361	Mpro+PPACK	5	210407_M_P_300sec_03	2	4.07392	60330	368.688
MPro	129	134	AMRPNF			4	735.361	Mpro+PPACK	30	210407_M_P_1800sec_01	2	4.07154	72925	368.77
MPro	129	134	AMRPNF			4	735.361	Mpro+PPACK	30	210407_M_P_1800sec_02	2	4.07672	34480	368.7
MPro	129	134	AMRPNF			4	735.361	Mpro+PPACK	30	210407_M_P_1800sec_03	2	4.07725	46242	368.689
MPro	129	134	AMRPNF			4	735.361	Mpro+PPACK	120	210407_M_P_7200sec_01	2	4.07342	52054	368.82
MPro	129	134	AMRPNF			4	735.361	Mpro+PPACK	120	210407_M_P_7200sec_02	2	4.07014	41824	368.717
MPro	129	134	AMRPNF			4	735.361	Mpro+PPACK	120	210407_M_P_7200sec_03	2	4.07065	48641	368.85
MPro	128	134	CAMRPNF			5	838.37	Mpro	0	DE-2021-04-07 M m0 2	1	4.28696	66710	839.19
MPro	128	134	CAMRPNF			5	838.37	Mpro	0	DE-2021-04-07 M m0 2	2	4.29003	139109	419.933
MPro	128	134	CAMRPNF			5	838.37	Mpro	0	DE-2021-04-07 M m0 3	1	4.28264	88493	839.07
MPro	128	134	CAMRPNF			5	838.37	Mpro	0	DE-2021-04-07 M m0 3	2	4.28263	219788	419.961
MPro	128	134	CAMRPNF			5	838.37	Mpro	0	DE-2021-04-07 M m0 4	1	4.27623	109958	839.045
MPro	128	134	CAMRPNF			5	838.37	Mpro	0	DE-2021-04-07 M m0 4	2	4.2775	285039	419.967
MPro	128	134	CAMRPNF			5	838.37	Mpro	0.25	210407_M_15sec_01	1	4.2747	119577	839.279
MPro	128	134	CAMRPNF			5	838.37	Mpro	0.25	210407_M_15sec_01	2	4.27454	274662	420.102
MPro	128	134	CAMRPNF			5	838.37	Mpro	0.25	210407_M_15sec_02	1	4.28326	101951	839.275
MPro	128	134	CAMRPNF			5	838.37	Mpro	0.25	210407_M_15sec_02	2	4.28445	244827	420.102
MPro	128	134	CAMRPNF			5	838.37	Mpro	0.25	210407_M_15sec_03	1	4.27619	74151	839.359
MPro	128	134	CAMRPNF			5	838.37	Mpro	0.25	210407_M_15sec_03	2	4.27591	198254	420.118
MPro	128	134	CAMRPNF			5	838.37	Mpro	1	210407_M_60sec_01	1	4.27524	111801	839.378
MPro	128	134	CAMRPNF			5	838.37	Mpro	1	210407_M_60sec_01	2	4.27225	270226	420.157
MPro	128	134	CAMRPNF			5	838.37	Mpro	1	210407_M_60sec_02	1	4.27782	163335	839.32
MPro	128	134	CAMRPNF			5	838.37	Mpro	1	210407_M_60sec_02	2	4.27841	363296	420.187
MPro	128	134	CAMRPNF			5	838.37	Mpro	1	210407_M_60sec_03	1	4.2745	157753	839.386
MPro	128	134	CAMRPNF			5	838.37	Mpro	1	210407_M_60sec_03	2	4.27405	368611	420.176
MPro	128	134	CAMRPNF			5	838.37	Mpro	5	210407_M_300sec_01	1	4.27292	132290	839.565
MPro	128	134	CAMRPNF			5	838.37	Mpro	5	210407_M_300sec_01	2	4.27117	331156	420.256
MPro	128	134	CAMRPNF			5	838.37	Mpro	5	210407_M_300sec_02	1	4.27191	145073	839.577
MPro	128	134	CAMRPNF			5	838.37	Mpro	5	210407_M_300sec_02	2	4.27186	347445	420.248
MPro	128	134	CAMRPNF			5	838.37	Mpro	5	210407_M_300sec_03	1	4.2752	142617	839.568
MPro	128	134	CAMRPNF			5	838.37	Mpro	5	210407_M_300sec_03	2	4.27546	341419	420.266
MPro	128	134	CAMRPNF			5	838.37	Mpro	30	210407_M_1800sec_01	1	4.26956	129666	839.917
MPro	128	134	CAMRPNF			5	838.37	Mpro	30	210407_M_1800sec_01	2	4.27028	325771	420.42
MPro	128	134	CAMRPNF			5	838.37	Mpro	30	210407_M_1800sec_02	1	4.27114	131796	839.889
MPro	128	134	CAMRPNF			5	838.37	Mpro	30	210407_M_1800sec_02	2	4.26962	316084	420.408
MPro	128	134	CAMRPNF			5	838.37	Mpro	30	210407_M_1800sec_03	1	4.27002	141801	839.928
MPro	128	134	CAMRPNF			5	838.37	Mpro	30	210407_M_1800sec_03	2	4.26935	350369	420.457
MPro	128	134	CAMRPNF			5	838.37	Mpro	120	210407_M_7200sec_01	1	4.26945	123128	839.99
MPro	128	134	CAMRPNF			5	838.37	Mpro	120	210407_M_7200sec_01	2	4.27168	311351	420.484
MPro	128	134	CAMRPNF			5	838.37	Mpro	120	210407_M_7200sec_02	1	4.27027	116782	839.997
MPro	128	134	CAMRPNF			5	838.37	Mpro	120	210407_M_7200sec_02	2	4.26965	322350	420.5
MPro	128	134	CAMRPNF			5	838.37	Mpro	120	210407_M_7200sec_03	1	4.27119	50615	839.802
MPro	128	134	CAMRPNF			5	838.37	Mpro	120	210407_M_7200sec_03	2	4.27069	145896	420.46
MPro	128	134	CAMRPNF			5	838.37	Mpro+PPACK	0	DE-2021-04-07 M m0 2	1	4.28696	66710	839.19
MPro	128	134	CAMRPNF			5	838.37	Mpro+PPACK	0	DE-2021-04-07 M m0 2	2	4.29003	139109	419.933
MPro	128	134	CAMRPNF			5	838.37	Mpro+PPACK	0	DE-2021-04-07 M m0 3	1	4.28264	88493	839.07
MPro	128	134	CAMRPNF			5	838.37	Mpro+PPACK	0	DE-2021-04-07 M m0 3	2	4.28263	219788	419.961
MPro	128	134	CAMRPNF			5	838.37	Mpro+PPACK	0	DE-2021-04-07 M m0 4	1	4.27623	109958	839.045
MPro	128	134	CAMRPNF			5	838.37	Mpro+PPACK	0	DE-2021-04-07 M m0 4	2	4.2775	285039	419.967
MPro	128	134	CAMRPNF			5	838.37	Mpro+PPACK	0.25	210407_M_P_15sec_01	1	4.27652	77817	839.708
MPro	128	134	CAMRPNF			5	838.37	Mpro+PPACK	0.25	210407_M_P_15sec_01	2	4.27787	181666	420.386
MPro	128	134	CAMRPNF			5	838.37	Mpro+PPACK	0.25	210407_M_P_15sec_02	1	4.27438	42868	839.045
MPro	128	134	CAMRPNF			5	838.37	Mpro+PPACK	0.25	210407_M_P_15sec_02	2	4.27588	181924	420.413
MPro	128	134	CAMRPNF			5	838.37	Mpro+PPACK	0.25	210407_M_P_15sec_03	1	4.27587	70784	839.756
MPro	128	134	CAMRPNF			5	838.37	Mpro+PPACK	0.25	210407_M_P_15sec_03	2	4.27391	171351	420.431
MPro	128	134	CAMRPNF			5	838.37	Mpro+PPACK	1	210407_M_P_60sec_01	1	4.27527	33626	839.85
MPro	128	134	CAMRPNF			5	838.37	Mpro+PPACK	1	210407_M_P_60sec_01	2	4.27714	77364	420.363
MPro	128	134	CAMRPNF			5	838.37	Mpro+PPACK	1	210407_M_P_60sec_02	1	4.27433	42192	839.104
MPro	128	134	CAMRPNF			5	838.37	Mpro+PPACK	1	210407_M_P_60sec_02	2	4.27507	180551	420.442
MPro	128	134	CAMRPNF			5	838.37	Mpro+PPACK	1	210407_M_P_60sec_03	1	4.27813	58521	839.787
MPro	128	134	CAMRPNF			5	838.37	Mpro+PPACK	1	210407_M_P_60sec_03	2	4.27654	139766	420.384
MPro	128	134	CAMRPNF			5	838.37	Mpro+PPACK	5	210407_M_P_300sec_01	1	4.27019	35434	840.112
MPro	128	134	CAMRPNF			5	838.37	Mpro+PPACK	5	210407_M_P_300sec_01	2	4.27134	120677	420.439
MPro	128	134	CAMRPNF			5	838.37	Mpro+PPACK	5	210407_M_P_300sec_02	1	4.27361	76943	839.975
MPro	128	134	CAMRPNF			5	838.37	Mpro+PPACK	5	210407_M_P_300sec_02	2	4.27527	194604	420.472
MPro	128	134	CAMRPNF			5	838.37	Mpro+PPACK	5	210407_M_P_300sec_03	1	4.2724	72186	840.025
MPro	128	134	CAMRPNF			5	838.37	Mpro+PPACK	5	210407_M_P_300sec_03	2	4.27497	158867	420.463
MPro	128	134	CAMRPNF			5	838.37	Mpro+PPACK	30	210407_M_P_1800sec_01	1	4.26987	67604	840.27
MPro	128	134	CAMRPNF			5	838.37	Mpro+PPACK	30	210407_M_P_1800sec_01	2	4.26966	170503	420.651
MPro	128	134	CAMRPNF			5	838.37	Mpro+PPACK	30	210407_M_P_1800sec_02	1	4.27434	32810	840.024
MPro	128	134	CAMRPNF			5	838.37	Mpro+PPACK	30	210407_M_P_1800sec_02	2	4.27554	92452	420.629
MPro	128	134	CAMRPNF			5	838.37	Mpro+PPACK	30	210407_M_P_1800sec_03	1	4.27326	45140	840.323
MPro	128	134	CAMRPNF			5	838.37	Mpro+PPACK	30	210407_M_P_1800sec_03	2	4.27385	114188	420.608
MPro	128	134	CAMRPNF			5	838.37	Mpro+PPACK	120	210407_M_P_7200sec_01	1	4.27298	47051	840.37
MPro	128	134	CAMRPNF			5	838.37	Mpro+PPACK	120	210407_M_P_7200sec_01	2	4.27262	127541	420.763
MPro	128	134	CAMRPNF			5	838.37	Mpro+PPACK	120	210407_M_P_7200sec_02	1	4.26529	37894	840.627
MPro	128	134	CAMRPNF			5	838.37	Mpro+PPACK	120	210407_M_P_7200sec_02	2	4.2685	110227	420.784
MPro	128	134	CAMRPNF			5	838.37	Mpro+PPACK	120	210407_M_P_7200sec_03	1	4.27122	49576	840.432
MPro	128	134	CAMRPNF			5	838.37	Mpro+PPACK	120	210407_M_P_7200sec_03	2	4.27148	117830	420.803
MPro	130	134	MRPNF			3	664.323	Mpro	0	DE-2021-04-07 M m0 2	1	3.97551	54544	664.761
MPro	130	134	MRPNF			3	664.323	Mpro	0	DE-2021-04-07 M m0 3	1	3.97274	85324	664.699
MPro	130	134	MRPNF			3	664.323	Mpro	0	DE-2021-04-07 M m0 4	1	3.9617	113885	664.784
MPro	130	134	MRPNF			3	664.323	Mpro	0.25	210407_M_15sec_01	1	3.96103	109602	664.96
MPro	130	134	MRPNF			3	664.323	Mpro	0.25	210407_M_15sec_02	1	3.97289	89349	664.82
MPro	130	134	MRPNF			3	664.323	Mpro	0.25	210407_M_15sec_03	1	3.96727	73730	664.867
MPro	130	134	MRPNF			3	664.323	Mpro	1	210407_M_60sec_01	1	3.96019	111261	665.032
MPro	130	134	MRPNF			3	664.323	Mpro	1	210407_M_60sec_02	1	3.96434	154480	665.023
MPro	130	134	MRPNF			3	664.323	Mpro	1	210407_M_60sec_03	1	3.96053	157539	665.022
MPro	130	134	MRPNF			3	664.323	Mpro	5	210407_M_300sec_01	1	3.95923	125318	665.218
MPro	130	134	MRPNF			3	664.323	Mpro	5	210407_M_300sec_02	1	3.95998	132634	665.214
MPro	130	134	MRPNF			3	664.323	Mpro	5	210407_M_300sec_03	1	3.96337	127747	665.158
MPro	130	134	MRPNF			3	664.323	Mpro	30	210407_M_1800sec_02	1	3.95647	125618	665.442
MPro	130	134	MRPNF			3	664.323	Mpro	30	210407_M_1800sec_03	1	3.95139	103675	665.457
MPro	130	134	MRPNF			3	664.323	Mpro	120	210407_M_7200sec_01	1	3.95507	96144	665.45
MPro	130	134	MRPNF			3	664.323	Mpro	120	210407_M_7200sec_02	1	3.95335	79830	665.228
MPro	130	134	MRPNF			3	664.323	Mpro	120	210407_M_7200sec_03	1	3.95856	40989	665.358
MPro	130	134	MRPNF			3	664.323	Mpro+PPACK	0	DE-2021-04-07 M m0 2	1	3.97551	54544	664.761
MPro	130	134	MRPNF			3	664.323	Mpro+PPACK	0	DE-2021-04-07 M m0 3	1	3.97274	85324	664.699
MPro	130	134	MRPNF			3	664.323	Mpro+PPACK	0	DE-2021-04-07 M m0 4	1	3.96064	108188	664.651
MPro	130	134	MRPNF			3	664.323	Mpro+PPACK	0.25	210407_M_P_15sec_01	1	3.93847	33834	665.211
MPro	130	134	MRPNF			3	664.323	Mpro+PPACK	0.25	210407_M_P_15sec_02	1	3.93656	32971	665.19
MPro	130	134	MRPNF			3	664.323	Mpro+PPACK	0.25	210407_M_P_15sec_03	1	3.93403	30823	665.312
MPro	130	134	MRPNF			3	664.323	Mpro+PPACK	1	210407_M_P_60sec_02	1	3.93736	35498	665.327
MPro	130	134	MRPNF			3	664.323	Mpro+PPACK	1	210407_M_P_60sec_03	1	3.94103	27262	665.245
MPro	130	134	MRPNF			3	664.323	Mpro+PPACK	5	210407_M_P_300sec_01	1	3.93305	21476	665.245
MPro	130	134	MRPNF			3	664.323	Mpro+PPACK	5	210407_M_P_300sec_02	1	3.93783	32730	665.38
MPro	130	134	MRPNF			3	664.323	Mpro+PPACK	5	210407_M_P_300sec_03	1	3.93399	32562	665.302
MPro	130	134	MRPNF			3	664.323	Mpro+PPACK	30	210407_M_P_1800sec_01	1	3.93231	29832	665.319
MPro	130	134	MRPNF			3	664.323	Mpro+PPACK	30	210407_M_P_1800sec_03	1	3.9381	23964	665.251
MPro	130	134	MRPNF			3	664.323	Mpro+PPACK	120	210407_M_P_7200sec_01	1	3.93822	22777	665.328
MPro	130	134	MRPNF			3	664.323	Mpro+PPACK	120	210407_M_P_7200sec_02	1	3.92968	20719	665.379
MPro	130	134	MRPNF			3	664.323	Mpro+PPACK	120	210407_M_P_7200sec_03	1	3.93533	21814	665.282
MPro	112	115	FSVL			3	465.271	Mpro	0	DE-2021-04-07 M m0 2	1	5.51253	253822	465.489
MPro	112	115	FSVL			3	465.271	Mpro	0	DE-2021-04-07 M m0 3	1	5.50542	350092	465.477
MPro	112	115	FSVL			3	465.271	Mpro	0	DE-2021-04-07 M m0 4	1	5.50737	476456	465.477
MPro	112	115	FSVL			3	465.271	Mpro	0.25	210407_M_15sec_01	1	5.50803	424348	465.493
MPro	112	115	FSVL			3	465.271	Mpro	0.25	210407_M_15sec_02	1	5.51817	414868	465.509
MPro	112	115	FSVL			3	465.271	Mpro	0.25	210407_M_15sec_03	1	5.50997	293423	465.518
MPro	112	115	FSVL			3	465.271	Mpro	1	210407_M_60sec_01	1	5.5071	438611	465.517
MPro	112	115	FSVL			3	465.271	Mpro	1	210407_M_60sec_02	1	5.50663	614428	465.508
MPro	112	115	FSVL			3	465.271	Mpro	1	210407_M_60sec_03	1	5.50267	644125	465.508
MPro	112	115	FSVL			3	465.271	Mpro	5	210407_M_300sec_01	1	5.50409	533144	465.495
MPro	112	115	FSVL			3	465.271	Mpro	5	210407_M_300sec_02	1	5.50363	541677	465.495
MPro	112	115	FSVL			3	465.271	Mpro	5	210407_M_300sec_03	1	5.50512	570330	465.49
MPro	112	115	FSVL			3	465.271	Mpro	30	210407_M_1800sec_01	1	5.49617	512241	465.501
MPro	112	115	FSVL			3	465.271	Mpro	30	210407_M_1800sec_02	1	5.5004	495787	465.503
MPro	112	115	FSVL			3	465.271	Mpro	30	210407_M_1800sec_03	1	5.50005	517847	465.498
MPro	112	115	FSVL			3	465.271	Mpro	120	210407_M_7200sec_01	1	5.50102	396042	465.51
MPro	112	115	FSVL			3	465.271	Mpro	120	210407_M_7200sec_02	1	5.50213	513383	465.491
MPro	112	115	FSVL			3	465.271	Mpro	120	210407_M_7200sec_03	1	5.49965	208741	465.517
MPro	112	115	FSVL			3	465.271	Mpro+PPACK	0	DE-2021-04-07 M m0 2	1	5.51253	253822	465.489
MPro	112	115	FSVL			3	465.271	Mpro+PPACK	0	DE-2021-04-07 M m0 3	1	5.50542	350092	465.477
MPro	112	115	FSVL			3	465.271	Mpro+PPACK	0	DE-2021-04-07 M m0 4	1	5.50737	476456	465.477
MPro	112	115	FSVL			3	465.271	Mpro+PPACK	0.25	210407_M_P_15sec_01	1	5.51304	254014	465.525
MPro	112	115	FSVL			3	465.271	Mpro+PPACK	0.25	210407_M_P_15sec_02	1	5.50747	247971	465.543
MPro	112	115	FSVL			3	465.271	Mpro+PPACK	0.25	210407_M_P_15sec_03	1	5.51	221211	465.546
MPro	112	115	FSVL			3	465.271	Mpro+PPACK	1	210407_M_P_60sec_01	1	5.50675	99524	465.465
MPro	112	115	FSVL			3	465.271	Mpro+PPACK	1	210407_M_P_60sec_02	1	5.5073	274502	465.539
MPro	112	115	FSVL			3	465.271	Mpro+PPACK	1	210407_M_P_60sec_03	1	5.51002	189812	465.554
MPro	112	115	FSVL			3	465.271	Mpro+PPACK	5	210407_M_P_300sec_01	1	5.5023	146483	465.551
MPro	112	115	FSVL			3	465.271	Mpro+PPACK	5	210407_M_P_300sec_02	1	5.50886	263142	465.527
MPro	112	115	FSVL			3	465.271	Mpro+PPACK	5	210407_M_P_300sec_03	1	5.50592	208628	465.548
MPro	112	115	FSVL			3	465.271	Mpro+PPACK	30	210407_M_P_1800sec_01	1	5.50192	214498	465.585
MPro	112	115	FSVL			3	465.271	Mpro+PPACK	30	210407_M_P_1800sec_02	1	5.50751	112658	465.63
MPro	112	115	FSVL			3	465.271	Mpro+PPACK	30	210407_M_P_1800sec_03	1	5.50872	146297	465.605
MPro	112	115	FSVL			3	465.271	Mpro+PPACK	120	210407_M_P_7200sec_01	1	5.50491	144089	465.763
MPro	112	115	FSVL			3	465.271	Mpro+PPACK	120	210407_M_P_7200sec_02	1	5.49997	144756	465.761
MPro	112	115	FSVL			3	465.271	Mpro+PPACK	120	210407_M_P_7200sec_03	1	5.51065	140340	465.768
MPro	104	112	VRIQPGQTF			7	1045.58	Mpro	0	DE-2021-04-07 M m0 2	1	4.2395	80143	1046.1
MPro	104	112	VRIQPGQTF			7	1045.58	Mpro	0	DE-2021-04-07 M m0 2	2	4.24095	653555	523.55
MPro	104	112	VRIQPGQTF			7	1045.58	Mpro	0	DE-2021-04-07 M m0 3	1	4.23646	118706	1046.16
MPro	104	112	VRIQPGQTF			7	1045.58	Mpro	0	DE-2021-04-07 M m0 3	2	4.2354	967573	523.538
MPro	104	112	VRIQPGQTF			7	1045.58	Mpro	0	DE-2021-04-07 M m0 4	1	4.23086	152553	1046.08
MPro	104	112	VRIQPGQTF			7	1045.58	Mpro	0	DE-2021-04-07 M m0 4	2	4.23044	1205533	523.545
MPro	104	112	VRIQPGQTF			7	1045.58	Mpro	0.25	210407_M_15sec_01	1	4.2321	152471	1046.56
MPro	104	112	VRIQPGQTF			7	1045.58	Mpro	0.25	210407_M_15sec_01	2	4.23122	1060594	523.713
MPro	104	112	VRIQPGQTF			7	1045.58	Mpro	0.25	210407_M_15sec_02	1	4.24127	123040	1046.49
MPro	104	112	VRIQPGQTF			7	1045.58	Mpro	0.25	210407_M_15sec_02	2	4.24008	932526	523.723
MPro	104	112	VRIQPGQTF			7	1045.58	Mpro	0.25	210407_M_15sec_03	1	4.23304	94095	1046.55
MPro	104	112	VRIQPGQTF			7	1045.58	Mpro	0.25	210407_M_15sec_03	2	4.23409	695569	523.729
MPro	104	112	VRIQPGQTF			7	1045.58	Mpro	1	210407_M_60sec_01	1	4.22984	147686	1046.62
MPro	104	112	VRIQPGQTF			7	1045.58	Mpro	1	210407_M_60sec_01	2	4.23031	1023230	523.745
MPro	104	112	VRIQPGQTF			7	1045.58	Mpro	1	210407_M_60sec_02	1	4.23396	208054	1046.63
MPro	104	112	VRIQPGQTF			7	1045.58	Mpro	1	210407_M_60sec_02	2	4.23315	1378795	523.735
MPro	104	112	VRIQPGQTF			7	1045.58	Mpro	1	210407_M_60sec_03	1	4.23268	206374	1046.55
MPro	104	112	VRIQPGQTF			7	1045.58	Mpro	1	210407_M_60sec_03	2	4.23201	1360400	523.716
MPro	104	112	VRIQPGQTF			7	1045.58	Mpro	5	210407_M_300sec_01	1	4.22825	167994	1046.6
MPro	104	112	VRIQPGQTF			7	1045.58	Mpro	5	210407_M_300sec_01	2	4.22835	1223333	523.719
MPro	104	112	VRIQPGQTF			7	1045.58	Mpro	5	210407_M_300sec_02	1	4.23	177141	1046.6
MPro	104	112	VRIQPGQTF			7	1045.58	Mpro	5	210407_M_300sec_02	2	4.22852	1286004	523.741
MPro	104	112	VRIQPGQTF			7	1045.58	Mpro	5	210407_M_300sec_03	1	4.23269	182509	1046.64
MPro	104	112	VRIQPGQTF			7	1045.58	Mpro	5	210407_M_300sec_03	2	4.23175	1305740	523.736
MPro	104	112	VRIQPGQTF			7	1045.58	Mpro	30	210407_M_1800sec_01	1	4.22775	153563	1046.99
MPro	104	112	VRIQPGQTF			7	1045.58	Mpro	30	210407_M_1800sec_01	2	4.22671	1110147	523.917
MPro	104	112	VRIQPGQTF			7	1045.58	Mpro	30	210407_M_1800sec_02	1	4.22749	161005	1047.06
MPro	104	112	VRIQPGQTF			7	1045.58	Mpro	30	210407_M_1800sec_02	2	4.22671	1095214	523.91
MPro	104	112	VRIQPGQTF			7	1045.58	Mpro	30	210407_M_1800sec_03	1	4.22672	165270	1047.15
MPro	104	112	VRIQPGQTF			7	1045.58	Mpro	30	210407_M_1800sec_03	2	4.22708	1132623	523.912
MPro	104	112	VRIQPGQTF			7	1045.58	Mpro	120	210407_M_7200sec_01	1	4.22615	146702	1047.74
MPro	104	112	VRIQPGQTF			7	1045.58	Mpro	120	210407_M_7200sec_01	2	4.22698	926737	524.14
MPro	104	112	VRIQPGQTF			7	1045.58	Mpro	120	210407_M_7200sec_02	1	4.22417	146231	1047.72
MPro	104	112	VRIQPGQTF			7	1045.58	Mpro	120	210407_M_7200sec_02	2	4.22594	909353	524.139
MPro	104	112	VRIQPGQTF			7	1045.58	Mpro	120	210407_M_7200sec_03	1	4.22558	56383	1047.44
MPro	104	112	VRIQPGQTF			7	1045.58	Mpro	120	210407_M_7200sec_03	2	4.22743	412158	524.106
MPro	104	112	VRIQPGQTF			7	1045.58	Mpro+PPACK	0	DE-2021-04-07 M m0 2	1	4.2395	80143	1046.1
MPro	104	112	VRIQPGQTF			7	1045.58	Mpro+PPACK	0	DE-2021-04-07 M m0 2	2	4.24095	653555	523.55
MPro	104	112	VRIQPGQTF			7	1045.58	Mpro+PPACK	0	DE-2021-04-07 M m0 3	1	4.23646	118706	1046.16
MPro	104	112	VRIQPGQTF			7	1045.58	Mpro+PPACK	0	DE-2021-04-07 M m0 3	2	4.2354	967573	523.538
MPro	104	112	VRIQPGQTF			7	1045.58	Mpro+PPACK	0	DE-2021-04-07 M m0 4	1	4.23086	152553	1046.08
MPro	104	112	VRIQPGQTF			7	1045.58	Mpro+PPACK	0	DE-2021-04-07 M m0 4	2	4.23044	1205533	523.545
MPro	104	112	VRIQPGQTF			7	1045.58	Mpro+PPACK	0.25	210407_M_P_15sec_01	1	4.23114	37533	1047.58
MPro	104	112	VRIQPGQTF			7	1045.58	Mpro+PPACK	0.25	210407_M_P_15sec_01	2	4.2316	559707	524.187
MPro	104	112	VRIQPGQTF			7	1045.58	Mpro+PPACK	0.25	210407_M_P_15sec_02	1	4.23374	94869	1047.54
MPro	104	112	VRIQPGQTF			7	1045.58	Mpro+PPACK	0.25	210407_M_P_15sec_02	2	4.23119	559469	524.216
MPro	104	112	VRIQPGQTF			7	1045.58	Mpro+PPACK	0.25	210407_M_P_15sec_03	1	4.23182	86508	1047.52
MPro	104	112	VRIQPGQTF			7	1045.58	Mpro+PPACK	0.25	210407_M_P_15sec_03	2	4.23119	511518	524.2
MPro	104	112	VRIQPGQTF			7	1045.58	Mpro+PPACK	1	210407_M_P_60sec_01	1	4.2334	39715	1047.67
MPro	104	112	VRIQPGQTF			7	1045.58	Mpro+PPACK	1	210407_M_P_60sec_01	2	4.23278	221396	524.173
MPro	104	112	VRIQPGQTF			7	1045.58	Mpro+PPACK	1	210407_M_P_60sec_02	1	4.23227	94294	1047.92
MPro	104	112	VRIQPGQTF			7	1045.58	Mpro+PPACK	1	210407_M_P_60sec_02	2	4.23014	530187	524.289
MPro	104	112	VRIQPGQTF			7	1045.58	Mpro+PPACK	1	210407_M_P_60sec_03	1	4.23615	71044	1047.67
MPro	104	112	VRIQPGQTF			7	1045.58	Mpro+PPACK	1	210407_M_P_60sec_03	2	4.23268	412411	524.27
MPro	104	112	VRIQPGQTF			7	1045.58	Mpro+PPACK	5	210407_M_P_300sec_01	1	4.22904	55616	1047.65
MPro	104	112	VRIQPGQTF			7	1045.58	Mpro+PPACK	5	210407_M_P_300sec_01	2	4.22626	315624	524.229
MPro	104	112	VRIQPGQTF			7	1045.58	Mpro+PPACK	5	210407_M_P_300sec_02	1	4.23055	51694	1048.1
MPro	104	112	VRIQPGQTF			7	1045.58	Mpro+PPACK	5	210407_M_P_300sec_02	2	4.23124	452347	524.34
MPro	104	112	VRIQPGQTF			7	1045.58	Mpro+PPACK	5	210407_M_P_300sec_03	1	4.23115	84638	1047.99
MPro	104	112	VRIQPGQTF			7	1045.58	Mpro+PPACK	5	210407_M_P_300sec_03	2	4.22962	397520	524.319
MPro	104	112	VRIQPGQTF			7	1045.58	Mpro+PPACK	30	210407_M_P_1800sec_01	1	4.22729	82601	1048.88
MPro	104	112	VRIQPGQTF			7	1045.58	Mpro+PPACK	30	210407_M_P_1800sec_01	2	4.22435	323463	524.399
MPro	104	112	VRIQPGQTF			7	1045.58	Mpro+PPACK	30	210407_M_P_1800sec_02	1	4.23167	42844	1048.57
MPro	104	112	VRIQPGQTF			7	1045.58	Mpro+PPACK	30	210407_M_P_1800sec_02	2	4.22901	177066	524.317
MPro	104	112	VRIQPGQTF			7	1045.58	Mpro+PPACK	30	210407_M_P_1800sec_03	1	4.23243	40879	1048.28
MPro	104	112	VRIQPGQTF			7	1045.58	Mpro+PPACK	30	210407_M_P_1800sec_03	2	4.22955	234748	524.39
MPro	104	112	VRIQPGQTF			7	1045.58	Mpro+PPACK	120	210407_M_P_7200sec_01	1	4.23011	56251	1048.84
MPro	104	112	VRIQPGQTF			7	1045.58	Mpro+PPACK	120	210407_M_P_7200sec_01	2	4.22774	218821	524.427
MPro	104	112	VRIQPGQTF			7	1045.58	Mpro+PPACK	120	210407_M_P_7200sec_02	1	4.22639	52406	1048.79
MPro	104	112	VRIQPGQTF			7	1045.58	Mpro+PPACK	120	210407_M_P_7200sec_02	2	4.22216	199535	524.42
MPro	104	112	VRIQPGQTF			7	1045.58	Mpro+PPACK	120	210407_M_P_7200sec_03	1	4.22949	60177	1049.03
MPro	104	112	VRIQPGQTF			7	1045.58	Mpro+PPACK	120	210407_M_P_7200sec_03	2	4.22728	209545	524.433
MPro	104	111	VRIQPGQT			6	898.51	Mpro	0	DE-2021-04-07 M m0 2	1	3.03339	55476	898.95
MPro	104	111	VRIQPGQT			6	898.51	Mpro	0	DE-2021-04-07 M m0 2	2	3.02779	250783	449.971
MPro	104	111	VRIQPGQT			6	898.51	Mpro	0	DE-2021-04-07 M m0 3	1	3.02641	71865	898.944
MPro	104	111	VRIQPGQT			6	898.51	Mpro	0	DE-2021-04-07 M m0 3	2	3.02449	341351	449.944
MPro	104	111	VRIQPGQT			6	898.51	Mpro	0	DE-2021-04-07 M m0 4	1	3.02611	91576	898.95
MPro	104	111	VRIQPGQT			6	898.51	Mpro	0	DE-2021-04-07 M m0 4	2	3.02396	459659	449.982
MPro	104	111	VRIQPGQT			6	898.51	Mpro	0.25	210407_M_15sec_01	1	3.02263	73426	899.455
MPro	104	111	VRIQPGQT			6	898.51	Mpro	0.25	210407_M_15sec_01	2	3.02297	394459	450.191
MPro	104	111	VRIQPGQT			6	898.51	Mpro	0.25	210407_M_15sec_02	1	3.03055	62321	899.377
MPro	104	111	VRIQPGQT			6	898.51	Mpro	0.25	210407_M_15sec_02	2	3.03335	380165	450.215
MPro	104	111	VRIQPGQT			6	898.51	Mpro	0.25	210407_M_15sec_03	1	3.02279	38742	899.236
MPro	104	111	VRIQPGQT			6	898.51	Mpro	0.25	210407_M_15sec_03	2	3.02515	285949	450.228
MPro	104	111	VRIQPGQT			6	898.51	Mpro	1	210407_M_60sec_01	1	3.00396	56938	899.477
MPro	104	111	VRIQPGQT			6	898.51	Mpro	1	210407_M_60sec_01	2	3.00714	411046	450.24
MPro	104	111	VRIQPGQT			6	898.51	Mpro	1	210407_M_60sec_02	1	3.02664	89072	899.436
MPro	104	111	VRIQPGQT			6	898.51	Mpro	1	210407_M_60sec_02	2	3.02643	592793	450.226
MPro	104	111	VRIQPGQT			6	898.51	Mpro	1	210407_M_60sec_03	1	3.02356	94636	899.349
MPro	104	111	VRIQPGQT			6	898.51	Mpro	1	210407_M_60sec_03	2	3.02434	591665	450.204
MPro	104	111	VRIQPGQT			6	898.51	Mpro	5	210407_M_300sec_01	1	3.01645	66956	899.395
MPro	104	111	VRIQPGQT			6	898.51	Mpro	5	210407_M_300sec_01	2	3.01676	505848	450.203
MPro	104	111	VRIQPGQT			6	898.51	Mpro	5	210407_M_300sec_02	1	3.02003	73085	899.477
MPro	104	111	VRIQPGQT			6	898.51	Mpro	5	210407_M_300sec_02	2	3.02156	550637	450.226
MPro	104	111	VRIQPGQT			6	898.51	Mpro	5	210407_M_300sec_03	1	3.02004	76144	899.46
MPro	104	111	VRIQPGQT			6	898.51	Mpro	5	210407_M_300sec_03	2	3.02042	536082	450.229
MPro	104	111	VRIQPGQT			6	898.51	Mpro	30	210407_M_1800sec_01	1	3.01612	59753	899.711
MPro	104	111	VRIQPGQT			6	898.51	Mpro	30	210407_M_1800sec_01	2	3.0135	493840	450.445
MPro	104	111	VRIQPGQT			6	898.51	Mpro	30	210407_M_1800sec_02	1	3.0206	61066	899.714
MPro	104	111	VRIQPGQT			6	898.51	Mpro	30	210407_M_1800sec_02	2	3.01838	476813	450.418
MPro	104	111	VRIQPGQT			6	898.51	Mpro	30	210407_M_1800sec_03	1	2.98642	57692	899.772
MPro	104	111	VRIQPGQT			6	898.51	Mpro	30	210407_M_1800sec_03	2	2.98409	476928	450.461
MPro	104	111	VRIQPGQT			6	898.51	Mpro	120	210407_M_7200sec_01	1	3.01325	58383	900.411
MPro	104	111	VRIQPGQT			6	898.51	Mpro	120	210407_M_7200sec_01	2	3.01279	419636	450.777
MPro	104	111	VRIQPGQT			6	898.51	Mpro	120	210407_M_7200sec_02	1	3.02217	64171	900.479
MPro	104	111	VRIQPGQT			6	898.51	Mpro	120	210407_M_7200sec_02	2	3.0237	465007	450.789
MPro	104	111	VRIQPGQT			6	898.51	Mpro	120	210407_M_7200sec_03	1	3.02398	23183	900.242
MPro	104	111	VRIQPGQT			6	898.51	Mpro	120	210407_M_7200sec_03	2	3.02288	204496	450.699
MPro	104	111	VRIQPGQT			6	898.51	Mpro+PPACK	0	DE-2021-04-07 M m0 2	1	3.03339	55476	898.95
MPro	104	111	VRIQPGQT			6	898.51	Mpro+PPACK	0	DE-2021-04-07 M m0 2	2	3.02779	250783	449.971
MPro	104	111	VRIQPGQT			6	898.51	Mpro+PPACK	0	DE-2021-04-07 M m0 3	1	3.02641	71865	898.944
MPro	104	111	VRIQPGQT			6	898.51	Mpro+PPACK	0	DE-2021-04-07 M m0 3	2	3.02449	341351	449.944
MPro	104	111	VRIQPGQT			6	898.51	Mpro+PPACK	0	DE-2021-04-07 M m0 4	1	3.02611	91576	898.95
MPro	104	111	VRIQPGQT			6	898.51	Mpro+PPACK	0	DE-2021-04-07 M m0 4	2	3.02396	459659	449.982
MPro	104	111	VRIQPGQT			6	898.51	Mpro+PPACK	0.25	210407_M_P_15sec_01	1	3.00878	59526	900.467
MPro	104	111	VRIQPGQT			6	898.51	Mpro+PPACK	0.25	210407_M_P_15sec_01	2	3.00474	229048	450.781
MPro	104	111	VRIQPGQT			6	898.51	Mpro+PPACK	0.25	210407_M_P_15sec_02	1	3.00812	64639	900.556
MPro	104	111	VRIQPGQT			6	898.51	Mpro+PPACK	0.25	210407_M_P_15sec_02	2	3.0033	234826	450.845
MPro	104	111	VRIQPGQT			6	898.51	Mpro+PPACK	0.25	210407_M_P_15sec_03	1	3.00949	58736	900.539
MPro	104	111	VRIQPGQT			6	898.51	Mpro+PPACK	0.25	210407_M_P_15sec_03	2	3.00217	198768	450.81
MPro	104	111	VRIQPGQT			6	898.51	Mpro+PPACK	1	210407_M_P_60sec_01	1	3.00155	19833	899.777
MPro	104	111	VRIQPGQT			6	898.51	Mpro+PPACK	1	210407_M_P_60sec_01	2	3.0002	119162	450.936
MPro	104	111	VRIQPGQT			6	898.51	Mpro+PPACK	1	210407_M_P_60sec_02	1	2.98613	70117	900.946
MPro	104	111	VRIQPGQT			6	898.51	Mpro+PPACK	1	210407_M_P_60sec_02	2	2.97786	227080	450.969
MPro	104	111	VRIQPGQT			6	898.51	Mpro+PPACK	1	210407_M_P_60sec_03	1	2.99268	43864	901.224
MPro	104	111	VRIQPGQT			6	898.51	Mpro+PPACK	1	210407_M_P_60sec_03	2	2.98152	184768	450.966
MPro	104	111	VRIQPGQT			6	898.51	Mpro+PPACK	5	210407_M_P_300sec_01	1	3.00138	49031	900.74
MPro	104	111	VRIQPGQT			6	898.51	Mpro+PPACK	5	210407_M_P_300sec_01	2	2.99488	155628	450.941
MPro	104	111	VRIQPGQT			6	898.51	Mpro+PPACK	5	210407_M_P_300sec_02	1	2.99309	75510	901.134
MPro	104	111	VRIQPGQT			6	898.51	Mpro+PPACK	5	210407_M_P_300sec_02	2	2.98907	219085	451.08
MPro	104	111	VRIQPGQT			6	898.51	Mpro+PPACK	5	210407_M_P_300sec_03	1	2.99979	57544	900.926
MPro	104	111	VRIQPGQT			6	898.51	Mpro+PPACK	5	210407_M_P_300sec_03	2	2.99527	198618	451.084
MPro	104	111	VRIQPGQT			6	898.51	Mpro+PPACK	30	210407_M_P_1800sec_01	1	2.99479	57855	901.079
MPro	104	111	VRIQPGQT			6	898.51	Mpro+PPACK	30	210407_M_P_1800sec_01	2	2.98965	192215	451.267
MPro	104	111	VRIQPGQT			6	898.51	Mpro+PPACK	30	210407_M_P_1800sec_02	1	2.98577	31050	901.203
MPro	104	111	VRIQPGQT			6	898.51	Mpro+PPACK	30	210407_M_P_1800sec_02	2	2.97924	126113	451.267
MPro	104	111	VRIQPGQT			6	898.51	Mpro+PPACK	30	210407_M_P_1800sec_03	1	2.996	54935	901.669
MPro	104	111	VRIQPGQT			6	898.51	Mpro+PPACK	30	210407_M_P_1800sec_03	2	2.99225	148638	451.272
MPro	104	111	VRIQPGQT			6	898.51	Mpro+PPACK	120	210407_M_P_7200sec_01	1	2.96696	55284	901.601
MPro	104	111	VRIQPGQT			6	898.51	Mpro+PPACK	120	210407_M_P_7200sec_01	2	2.96261	127849	451.302
MPro	104	111	VRIQPGQT			6	898.51	Mpro+PPACK	120	210407_M_P_7200sec_02	1	2.98555	53000	901.62
MPro	104	111	VRIQPGQT			6	898.51	Mpro+PPACK	120	210407_M_P_7200sec_02	2	2.98035	110037	451.416
MPro	104	111	VRIQPGQT			6	898.51	Mpro+PPACK	120	210407_M_P_7200sec_03	1	2.96836	56382	901.725
MPro	104	111	VRIQPGQT			6	898.51	Mpro+PPACK	120	210407_M_P_7200sec_03	2	2.95917	130929	451.433
MPro	88	103	KLKVDTANPKTPKYKF			13	1878.08	Mpro	0	DE-2021-04-07 M m0 2	3	3.43276	224024	627.023
MPro	88	103	KLKVDTANPKTPKYKF			13	1878.08	Mpro	0	DE-2021-04-07 M m0 3	3	3.42613	370788	627.048
MPro	88	103	KLKVDTANPKTPKYKF			13	1878.08	Mpro	0	DE-2021-04-07 M m0 4	3	3.41947	413071	627.071
MPro	88	103	KLKVDTANPKTPKYKF			13	1878.08	Mpro	0.25	210407_M_15sec_01	3	3.41895	433956	627.869
MPro	88	103	KLKVDTANPKTPKYKF			13	1878.08	Mpro	0.25	210407_M_15sec_02	3	3.42938	383192	627.898
MPro	88	103	KLKVDTANPKTPKYKF			13	1878.08	Mpro	0.25	210407_M_15sec_03	3	3.42665	276074	627.903
MPro	88	103	KLKVDTANPKTPKYKF			13	1878.08	Mpro	1	210407_M_60sec_01	3	3.41972	411185	628.024
MPro	88	103	KLKVDTANPKTPKYKF			13	1878.08	Mpro	1	210407_M_60sec_02	3	3.42604	550548	628.006
MPro	88	103	KLKVDTANPKTPKYKF			13	1878.08	Mpro	1	210407_M_60sec_03	3	3.42153	549460	627.991
MPro	88	103	KLKVDTANPKTPKYKF			13	1878.08	Mpro	5	210407_M_300sec_01	3	3.42765	418241	628.099
MPro	88	103	KLKVDTANPKTPKYKF			13	1878.08	Mpro	5	210407_M_300sec_02	3	3.43267	467747	628.088
MPro	88	103	KLKVDTANPKTPKYKF			13	1878.08	Mpro	5	210407_M_300sec_03	3	3.43655	407663	628.117
MPro	88	103	KLKVDTANPKTPKYKF			13	1878.08	Mpro	30	210407_M_1800sec_01	3	3.43392	338107	628.404
MPro	88	103	KLKVDTANPKTPKYKF			13	1878.08	Mpro	30	210407_M_1800sec_02	3	3.43467	357601	628.327
MPro	88	103	KLKVDTANPKTPKYKF			13	1878.08	Mpro	30	210407_M_1800sec_03	3	3.43507	346018	628.363
MPro	88	103	KLKVDTANPKTPKYKF			13	1878.08	Mpro	120	210407_M_7200sec_01	3	3.44088	330906	628.528
MPro	88	103	KLKVDTANPKTPKYKF			13	1878.08	Mpro	120	210407_M_7200sec_02	3	3.44566	253520	628.489
MPro	88	103	KLKVDTANPKTPKYKF			13	1878.08	Mpro	120	210407_M_7200sec_03	3	3.45108	75724	628.35
MPro	88	103	KLKVDTANPKTPKYKF			13	1878.08	Mpro+PPACK	0	DE-2021-04-07 M m0 2	3	3.43276	224024	627.023
MPro	88	103	KLKVDTANPKTPKYKF			13	1878.08	Mpro+PPACK	0	DE-2021-04-07 M m0 3	3	3.42613	370788	627.048
MPro	88	103	KLKVDTANPKTPKYKF			13	1878.08	Mpro+PPACK	0	DE-2021-04-07 M m0 4	3	3.41947	413071	627.071
MPro	88	103	KLKVDTANPKTPKYKF			13	1878.08	Mpro+PPACK	0.25	210407_M_P_15sec_01	3	3.40646	221088	627.878
MPro	88	103	KLKVDTANPKTPKYKF			13	1878.08	Mpro+PPACK	0.25	210407_M_P_15sec_02	3	3.40064	208050	627.898
MPro	88	103	KLKVDTANPKTPKYKF			13	1878.08	Mpro+PPACK	0.25	210407_M_P_15sec_03	3	3.40306	185706	627.96
MPro	88	103	KLKVDTANPKTPKYKF			13	1878.08	Mpro+PPACK	1	210407_M_P_60sec_01	3	3.41181	75498	627.938
MPro	88	103	KLKVDTANPKTPKYKF			13	1878.08	Mpro+PPACK	1	210407_M_P_60sec_02	3	3.40046	201021	628.118
MPro	88	103	KLKVDTANPKTPKYKF			13	1878.08	Mpro+PPACK	1	210407_M_P_60sec_03	3	3.41111	152575	628.088
MPro	88	103	KLKVDTANPKTPKYKF			13	1878.08	Mpro+PPACK	5	210407_M_P_300sec_01	3	3.41008	102855	627.873
MPro	88	103	KLKVDTANPKTPKYKF			13	1878.08	Mpro+PPACK	5	210407_M_P_300sec_02	3	3.42073	149038	628.118
MPro	88	103	KLKVDTANPKTPKYKF			13	1878.08	Mpro+PPACK	5	210407_M_P_300sec_03	3	3.41608	125724	628.244
MPro	88	103	KLKVDTANPKTPKYKF			13	1878.08	Mpro+PPACK	30	210407_M_P_1800sec_01	3	3.41689	94709	628.253
MPro	88	103	KLKVDTANPKTPKYKF			13	1878.08	Mpro+PPACK	30	210407_M_P_1800sec_03	3	3.4295	51815	628.234
MPro	88	103	KLKVDTANPKTPKYKF			13	1878.08	Mpro+PPACK	120	210407_M_P_7200sec_01	3	3.44539	37144	628.226
MPro	90	103	KVDTANPKTPKYKF			11	1636.91	Mpro	0	DE-2021-04-07 M m0 2	4	3.37867	260200	410.205
MPro	90	103	KVDTANPKTPKYKF			11	1636.91	Mpro	0	DE-2021-04-07 M m0 3	4	3.37204	389691	410.194
MPro	90	103	KVDTANPKTPKYKF			11	1636.91	Mpro	0	DE-2021-04-07 M m0 4	4	3.36172	513910	410.203
MPro	90	103	KVDTANPKTPKYKF			11	1636.91	Mpro	0.25	210407_M_15sec_01	4	3.36431	407196	410.956
MPro	90	103	KVDTANPKTPKYKF			11	1636.91	Mpro	0.25	210407_M_15sec_02	4	3.37454	374792	410.952
MPro	90	103	KVDTANPKTPKYKF			11	1636.91	Mpro	0.25	210407_M_15sec_03	4	3.36734	286571	410.945
MPro	90	103	KVDTANPKTPKYKF			11	1636.91	Mpro	1	210407_M_60sec_01	4	3.36125	416932	411.038
MPro	90	103	KVDTANPKTPKYKF			11	1636.91	Mpro	1	210407_M_60sec_02	4	3.36677	553452	411.048
MPro	90	103	KVDTANPKTPKYKF			11	1636.91	Mpro	1	210407_M_60sec_03	4	3.36401	550657	411.05
MPro	90	103	KVDTANPKTPKYKF			11	1636.91	Mpro	5	210407_M_300sec_01	4	3.36248	475929	411.109
MPro	90	103	KVDTANPKTPKYKF			11	1636.91	Mpro	5	210407_M_300sec_02	4	3.36376	525527	411.126
MPro	90	103	KVDTANPKTPKYKF			11	1636.91	Mpro	5	210407_M_300sec_03	4	3.36912	485504	411.149
MPro	90	103	KVDTANPKTPKYKF			11	1636.91	Mpro	30	210407_M_1800sec_01	4	3.36397	455206	411.318
MPro	90	103	KVDTANPKTPKYKF			11	1636.91	Mpro	30	210407_M_1800sec_02	4	3.36381	466226	411.329
MPro	90	103	KVDTANPKTPKYKF			11	1636.91	Mpro	30	210407_M_1800sec_03	4	3.36035	484086	411.341
MPro	90	103	KVDTANPKTPKYKF			11	1636.91	Mpro	120	210407_M_7200sec_01	4	3.36642	454389	411.403
MPro	90	103	KVDTANPKTPKYKF			11	1636.91	Mpro	120	210407_M_7200sec_02	4	3.36748	447777	411.393
MPro	90	103	KVDTANPKTPKYKF			11	1636.91	Mpro	120	210407_M_7200sec_03	4	3.37729	189688	411.252
MPro	90	103	KVDTANPKTPKYKF			11	1636.91	Mpro+PPACK	0	DE-2021-04-07 M m0 2	4	3.37867	260200	410.205
MPro	90	103	KVDTANPKTPKYKF			11	1636.91	Mpro+PPACK	0	DE-2021-04-07 M m0 3	4	3.37204	389691	410.194
MPro	90	103	KVDTANPKTPKYKF			11	1636.91	Mpro+PPACK	0	DE-2021-04-07 M m0 4	4	3.36172	513910	410.203
MPro	90	103	KVDTANPKTPKYKF			11	1636.91	Mpro+PPACK	0.25	210407_M_P_15sec_01	1	3.33426	17578	1640.3
MPro	90	103	KVDTANPKTPKYKF			11	1636.91	Mpro+PPACK	0.25	210407_M_P_15sec_01	4	3.33259	138476	410.977
MPro	90	103	KVDTANPKTPKYKF			11	1636.91	Mpro+PPACK	0.25	210407_M_P_15sec_02	1	3.32872	21304	1640.1
MPro	90	103	KVDTANPKTPKYKF			11	1636.91	Mpro+PPACK	0.25	210407_M_P_15sec_02	4	3.33362	124137	411.059
MPro	90	103	KVDTANPKTPKYKF			11	1636.91	Mpro+PPACK	0.25	210407_M_P_15sec_03	1	3.33414	7046	1639.38
MPro	90	103	KVDTANPKTPKYKF			11	1636.91	Mpro+PPACK	0.25	210407_M_P_15sec_03	4	3.33176	136362	410.992
MPro	90	103	KVDTANPKTPKYKF			11	1636.91	Mpro+PPACK	1	210407_M_P_60sec_01	4	3.34011	42475	411.105
MPro	90	103	KVDTANPKTPKYKF			11	1636.91	Mpro+PPACK	1	210407_M_P_60sec_02	1	3.31845	20363	1641.22
MPro	90	103	KVDTANPKTPKYKF			11	1636.91	Mpro+PPACK	1	210407_M_P_60sec_02	4	3.3306	142007	411.147
MPro	90	103	KVDTANPKTPKYKF			11	1636.91	Mpro+PPACK	1	210407_M_P_60sec_03	1	3.32772	6878	1639.48
MPro	90	103	KVDTANPKTPKYKF			11	1636.91	Mpro+PPACK	1	210407_M_P_60sec_03	4	3.33948	96288	411.157
MPro	90	103	KVDTANPKTPKYKF			11	1636.91	Mpro+PPACK	5	210407_M_P_300sec_01	4	3.33413	77000	411.111
MPro	90	103	KVDTANPKTPKYKF			11	1636.91	Mpro+PPACK	5	210407_M_P_300sec_02	1	3.33091	11827	1640.97
MPro	90	103	KVDTANPKTPKYKF			11	1636.91	Mpro+PPACK	5	210407_M_P_300sec_02	4	3.34211	119346	411.195
MPro	90	103	KVDTANPKTPKYKF			11	1636.91	Mpro+PPACK	5	210407_M_P_300sec_03	1	3.32718	12980	1641.8
MPro	90	103	KVDTANPKTPKYKF			11	1636.91	Mpro+PPACK	5	210407_M_P_300sec_03	4	3.34197	105848	411.143
MPro	90	103	KVDTANPKTPKYKF			11	1636.91	Mpro+PPACK	30	210407_M_P_1800sec_01	1	3.33499	11489	1641.99
MPro	90	103	KVDTANPKTPKYKF			11	1636.91	Mpro+PPACK	30	210407_M_P_1800sec_01	4	3.34545	122724	411.304
MPro	90	103	KVDTANPKTPKYKF			11	1636.91	Mpro+PPACK	30	210407_M_P_1800sec_02	4	3.35466	49161	411.344
MPro	90	103	KVDTANPKTPKYKF			11	1636.91	Mpro+PPACK	30	210407_M_P_1800sec_03	4	3.35256	80345	411.285
MPro	90	103	KVDTANPKTPKYKF			11	1636.91	Mpro+PPACK	120	210407_M_P_7200sec_01	4	3.34919	82510	411.297
MPro	90	103	KVDTANPKTPKYKF			11	1636.91	Mpro+PPACK	120	210407_M_P_7200sec_02	4	3.35518	70217	411.364
MPro	90	103	KVDTANPKTPKYKF			11	1636.91	Mpro+PPACK	120	210407_M_P_7200sec_03	4	3.35419	86569	411.433
MPro	76	87	RVIGHSMQNCVL			11	1356.69	Mpro	0	DE-2021-04-07 M m0 2	1	4.34326	8330	1357.13
MPro	76	87	RVIGHSMQNCVL			11	1356.69	Mpro	0	DE-2021-04-07 M m0 2	2	4.34559	120377	679.283
MPro	76	87	RVIGHSMQNCVL			11	1356.69	Mpro	0	DE-2021-04-07 M m0 2	3	4.34632	110080	453.161
MPro	76	87	RVIGHSMQNCVL			11	1356.69	Mpro	0	DE-2021-04-07 M m0 3	1	4.33716	18037	1357.5
MPro	76	87	RVIGHSMQNCVL			11	1356.69	Mpro	0	DE-2021-04-07 M m0 3	2	4.33699	207402	679.293
MPro	76	87	RVIGHSMQNCVL			11	1356.69	Mpro	0	DE-2021-04-07 M m0 3	3	4.33765	190494	453.155
MPro	76	87	RVIGHSMQNCVL			11	1356.69	Mpro	0	DE-2021-04-07 M m0 4	1	4.32688	19827	1357.52
MPro	76	87	RVIGHSMQNCVL			11	1356.69	Mpro	0	DE-2021-04-07 M m0 4	2	4.33214	252380	679.27
MPro	76	87	RVIGHSMQNCVL			11	1356.69	Mpro	0	DE-2021-04-07 M m0 4	3	4.3315	256308	453.168
MPro	76	87	RVIGHSMQNCVL			11	1356.69	Mpro	0.25	210407_M_15sec_01	1	4.33094	21159	1359.09
MPro	76	87	RVIGHSMQNCVL			11	1356.69	Mpro	0.25	210407_M_15sec_01	2	4.32892	240410	680.107
MPro	76	87	RVIGHSMQNCVL			11	1356.69	Mpro	0.25	210407_M_15sec_01	3	4.33073	185153	453.709
MPro	76	87	RVIGHSMQNCVL			11	1356.69	Mpro	0.25	210407_M_15sec_02	1	4.33792	15490	1358.74
MPro	76	87	RVIGHSMQNCVL			11	1356.69	Mpro	0.25	210407_M_15sec_02	2	4.33878	247140	680.102
MPro	76	87	RVIGHSMQNCVL			11	1356.69	Mpro	0.25	210407_M_15sec_02	3	4.3388	207655	453.731
MPro	76	87	RVIGHSMQNCVL			11	1356.69	Mpro	0.25	210407_M_15sec_03	1	4.33615	7932	1358.27
MPro	76	87	RVIGHSMQNCVL			11	1356.69	Mpro	0.25	210407_M_15sec_03	2	4.33187	174003	680.045
MPro	76	87	RVIGHSMQNCVL			11	1356.69	Mpro	0.25	210407_M_15sec_03	3	4.33375	151921	453.705
MPro	76	87	RVIGHSMQNCVL			11	1356.69	Mpro	1	210407_M_60sec_01	1	4.32337	22716	1359.09
MPro	76	87	RVIGHSMQNCVL			11	1356.69	Mpro	1	210407_M_60sec_01	2	4.32817	262637	680.169
MPro	76	87	RVIGHSMQNCVL			11	1356.69	Mpro	1	210407_M_60sec_01	3	4.33081	222231	453.7
MPro	76	87	RVIGHSMQNCVL			11	1356.69	Mpro	1	210407_M_60sec_02	1	4.32974	28297	1359.14
MPro	76	87	RVIGHSMQNCVL			11	1356.69	Mpro	1	210407_M_60sec_02	2	4.33129	357429	680.192
MPro	76	87	RVIGHSMQNCVL			11	1356.69	Mpro	1	210407_M_60sec_02	3	4.33278	300169	453.755
MPro	76	87	RVIGHSMQNCVL			11	1356.69	Mpro	1	210407_M_60sec_03	1	4.32886	26950	1359.09
MPro	76	87	RVIGHSMQNCVL			11	1356.69	Mpro	1	210407_M_60sec_03	2	4.32684	369629	680.138
MPro	76	87	RVIGHSMQNCVL			11	1356.69	Mpro	1	210407_M_60sec_03	3	4.32929	309482	453.744
MPro	76	87	RVIGHSMQNCVL			11	1356.69	Mpro	5	210407_M_300sec_01	1	4.32725	23024	1359.12
MPro	76	87	RVIGHSMQNCVL			11	1356.69	Mpro	5	210407_M_300sec_01	2	4.32664	307414	680.097
MPro	76	87	RVIGHSMQNCVL			11	1356.69	Mpro	5	210407_M_300sec_01	3	4.33009	270157	453.706
MPro	76	87	RVIGHSMQNCVL			11	1356.69	Mpro	5	210407_M_300sec_02	1	4.32432	25644	1359.09
MPro	76	87	RVIGHSMQNCVL			11	1356.69	Mpro	5	210407_M_300sec_02	2	4.32711	309054	680.11
MPro	76	87	RVIGHSMQNCVL			11	1356.69	Mpro	5	210407_M_300sec_02	3	4.32909	301929	453.704
MPro	76	87	RVIGHSMQNCVL			11	1356.69	Mpro	5	210407_M_300sec_03	1	4.32937	25783	1359.09
MPro	76	87	RVIGHSMQNCVL			11	1356.69	Mpro	5	210407_M_300sec_03	2	4.33206	308222	680.1
MPro	76	87	RVIGHSMQNCVL			11	1356.69	Mpro	5	210407_M_300sec_03	3	4.33228	300217	453.732
MPro	76	87	RVIGHSMQNCVL			11	1356.69	Mpro	30	210407_M_1800sec_01	1	4.32258	22927	1358.42
MPro	76	87	RVIGHSMQNCVL			11	1356.69	Mpro	30	210407_M_1800sec_01	2	4.32465	276650	680.17
MPro	76	87	RVIGHSMQNCVL			11	1356.69	Mpro	30	210407_M_1800sec_01	3	4.32759	265165	453.738
MPro	76	87	RVIGHSMQNCVL			11	1356.69	Mpro	30	210407_M_1800sec_02	1	4.32461	24277	1359.21
MPro	76	87	RVIGHSMQNCVL			11	1356.69	Mpro	30	210407_M_1800sec_02	2	4.32488	271990	680.13
MPro	76	87	RVIGHSMQNCVL			11	1356.69	Mpro	30	210407_M_1800sec_02	3	4.32792	261257	453.749
MPro	76	87	RVIGHSMQNCVL			11	1356.69	Mpro	30	210407_M_1800sec_03	1	4.32077	22650	1359.16
MPro	76	87	RVIGHSMQNCVL			11	1356.69	Mpro	30	210407_M_1800sec_03	2	4.32615	305760	680.168
MPro	76	87	RVIGHSMQNCVL			11	1356.69	Mpro	30	210407_M_1800sec_03	3	4.3293	305030	453.754
MPro	76	87	RVIGHSMQNCVL			11	1356.69	Mpro	120	210407_M_7200sec_01	1	4.32486	21618	1359.31
MPro	76	87	RVIGHSMQNCVL			11	1356.69	Mpro	120	210407_M_7200sec_01	2	4.32662	287346	680.321
MPro	76	87	RVIGHSMQNCVL			11	1356.69	Mpro	120	210407_M_7200sec_01	3	4.32972	259706	453.881
MPro	76	87	RVIGHSMQNCVL			11	1356.69	Mpro	120	210407_M_7200sec_02	1	4.32397	21281	1359.33
MPro	76	87	RVIGHSMQNCVL			11	1356.69	Mpro	120	210407_M_7200sec_02	2	4.32246	273854	680.35
MPro	76	87	RVIGHSMQNCVL			11	1356.69	Mpro	120	210407_M_7200sec_02	3	4.3275	267675	453.854
MPro	76	87	RVIGHSMQNCVL			11	1356.69	Mpro	120	210407_M_7200sec_03	2	4.32571	133615	680.238
MPro	76	87	RVIGHSMQNCVL			11	1356.69	Mpro	120	210407_M_7200sec_03	3	4.32811	131773	453.798
MPro	76	87	RVIGHSMQNCVL			11	1356.69	Mpro+PPACK	0	DE-2021-04-07 M m0 2	1	4.34326	8330	1357.13
MPro	76	87	RVIGHSMQNCVL			11	1356.69	Mpro+PPACK	0	DE-2021-04-07 M m0 2	2	4.34559	120377	679.283
MPro	76	87	RVIGHSMQNCVL			11	1356.69	Mpro+PPACK	0	DE-2021-04-07 M m0 2	3	4.34632	110080	453.161
MPro	76	87	RVIGHSMQNCVL			11	1356.69	Mpro+PPACK	0	DE-2021-04-07 M m0 3	1	4.33716	18037	1357.5
MPro	76	87	RVIGHSMQNCVL			11	1356.69	Mpro+PPACK	0	DE-2021-04-07 M m0 3	2	4.33699	207402	679.293
MPro	76	87	RVIGHSMQNCVL			11	1356.69	Mpro+PPACK	0	DE-2021-04-07 M m0 3	3	4.33765	190494	453.155
MPro	76	87	RVIGHSMQNCVL			11	1356.69	Mpro+PPACK	0	DE-2021-04-07 M m0 4	1	4.32688	19827	1357.52
MPro	76	87	RVIGHSMQNCVL			11	1356.69	Mpro+PPACK	0	DE-2021-04-07 M m0 4	2	4.33214	252380	679.27
MPro	76	87	RVIGHSMQNCVL			11	1356.69	Mpro+PPACK	0	DE-2021-04-07 M m0 4	3	4.3315	256308	453.168
MPro	76	87	RVIGHSMQNCVL			11	1356.69	Mpro+PPACK	0.25	210407_M_P_15sec_01	1	4.32979	7623	1359.25
MPro	76	87	RVIGHSMQNCVL			11	1356.69	Mpro+PPACK	0.25	210407_M_P_15sec_01	2	4.33119	171193	680.052
MPro	76	87	RVIGHSMQNCVL			11	1356.69	Mpro+PPACK	0.25	210407_M_P_15sec_01	3	4.33344	140777	453.649
MPro	76	87	RVIGHSMQNCVL			11	1356.69	Mpro+PPACK	0.25	210407_M_P_15sec_02	1	4.33419	7743	1359.12
MPro	76	87	RVIGHSMQNCVL			11	1356.69	Mpro+PPACK	0.25	210407_M_P_15sec_02	2	4.33206	133605	679.791
MPro	76	87	RVIGHSMQNCVL			11	1356.69	Mpro+PPACK	0.25	210407_M_P_15sec_02	3	4.33409	139587	453.685
MPro	76	87	RVIGHSMQNCVL			11	1356.69	Mpro+PPACK	0.25	210407_M_P_15sec_03	1	4.32654	12191	1358.68
MPro	76	87	RVIGHSMQNCVL			11	1356.69	Mpro+PPACK	0.25	210407_M_P_15sec_03	2	4.33135	147948	680.003
MPro	76	87	RVIGHSMQNCVL			11	1356.69	Mpro+PPACK	0.25	210407_M_P_15sec_03	3	4.33148	134320	453.659
MPro	76	87	RVIGHSMQNCVL			11	1356.69	Mpro+PPACK	1	210407_M_P_60sec_01	2	4.33157	53911	680.356
MPro	76	87	RVIGHSMQNCVL			11	1356.69	Mpro+PPACK	1	210407_M_P_60sec_01	3	4.33556	74798	453.582
MPro	76	87	RVIGHSMQNCVL			11	1356.69	Mpro+PPACK	1	210407_M_P_60sec_02	2	4.33135	166981	680.031
MPro	76	87	RVIGHSMQNCVL			11	1356.69	Mpro+PPACK	1	210407_M_P_60sec_02	3	4.33628	147047	453.672
MPro	76	87	RVIGHSMQNCVL			11	1356.69	Mpro+PPACK	1	210407_M_P_60sec_03	1	4.33179	6334	1359.21
MPro	76	87	RVIGHSMQNCVL			11	1356.69	Mpro+PPACK	1	210407_M_P_60sec_03	2	4.33271	123673	680.003
MPro	76	87	RVIGHSMQNCVL			11	1356.69	Mpro+PPACK	1	210407_M_P_60sec_03	3	4.3388	116334	453.644
MPro	76	87	RVIGHSMQNCVL			11	1356.69	Mpro+PPACK	5	210407_M_P_300sec_01	2	4.3286	101890	680.043
MPro	76	87	RVIGHSMQNCVL			11	1356.69	Mpro+PPACK	5	210407_M_P_300sec_01	3	4.33185	103865	453.559
MPro	76	87	RVIGHSMQNCVL			11	1356.69	Mpro+PPACK	5	210407_M_P_300sec_02	2	4.33403	158989	680.107
MPro	76	87	RVIGHSMQNCVL			11	1356.69	Mpro+PPACK	5	210407_M_P_300sec_02	3	4.33387	152261	453.68
MPro	76	87	RVIGHSMQNCVL			11	1356.69	Mpro+PPACK	5	210407_M_P_300sec_03	1	4.32679	10055	1358.7
MPro	76	87	RVIGHSMQNCVL			11	1356.69	Mpro+PPACK	5	210407_M_P_300sec_03	2	4.32851	84329	679.504
MPro	76	87	RVIGHSMQNCVL			11	1356.69	Mpro+PPACK	5	210407_M_P_300sec_03	3	4.33195	139246	453.687
MPro	76	87	RVIGHSMQNCVL			11	1356.69	Mpro+PPACK	30	210407_M_P_1800sec_01	1	4.31677	7293	1359.2
MPro	76	87	RVIGHSMQNCVL			11	1356.69	Mpro+PPACK	30	210407_M_P_1800sec_01	2	4.3289	146582	680.051
MPro	76	87	RVIGHSMQNCVL			11	1356.69	Mpro+PPACK	30	210407_M_P_1800sec_01	3	4.33074	147700	453.704
MPro	76	87	RVIGHSMQNCVL			11	1356.69	Mpro+PPACK	30	210407_M_P_1800sec_02	2	4.3312	87134	680
MPro	76	87	RVIGHSMQNCVL			11	1356.69	Mpro+PPACK	30	210407_M_P_1800sec_02	3	4.33973	90500	453.649
MPro	76	87	RVIGHSMQNCVL			11	1356.69	Mpro+PPACK	30	210407_M_P_1800sec_03	2	4.33092	107371	680.085
MPro	76	87	RVIGHSMQNCVL			11	1356.69	Mpro+PPACK	30	210407_M_P_1800sec_03	3	4.33281	112408	453.636
MPro	76	87	RVIGHSMQNCVL			11	1356.69	Mpro+PPACK	120	210407_M_P_7200sec_01	2	4.32967	121331	680.225
MPro	76	87	RVIGHSMQNCVL			11	1356.69	Mpro+PPACK	120	210407_M_P_7200sec_01	3	4.33429	114775	453.767
MPro	76	87	RVIGHSMQNCVL			11	1356.69	Mpro+PPACK	120	210407_M_P_7200sec_02	2	4.3255	116108	680.229
MPro	76	87	RVIGHSMQNCVL			11	1356.69	Mpro+PPACK	120	210407_M_P_7200sec_02	3	4.33036	112225	453.715
MPro	76	87	RVIGHSMQNCVL			11	1356.69	Mpro+PPACK	120	210407_M_P_7200sec_03	2	4.33114	108608	680.332
MPro	76	87	RVIGHSMQNCVL			11	1356.69	Mpro+PPACK	120	210407_M_P_7200sec_03	3	4.33455	118038	453.719
MPro	70	75	AGNVQL			5	601.33	Mpro	0	DE-2021-04-07 M m0 2	1	4.09108	36136	601.588
MPro	70	75	AGNVQL			5	601.33	Mpro	0	DE-2021-04-07 M m0 3	1	4.08766	51061	601.556
MPro	70	75	AGNVQL			5	601.33	Mpro	0	DE-2021-04-07 M m0 4	1	4.08011	70717	601.557
MPro	70	75	AGNVQL			5	601.33	Mpro	0.25	210407_M_15sec_01	1	4.08042	60112	603.445
MPro	70	75	AGNVQL			5	601.33	Mpro	0.25	210407_M_15sec_02	1	4.08923	62616	603.312
MPro	70	75	AGNVQL			5	601.33	Mpro	0.25	210407_M_15sec_03	1	4.08174	43153	603.263
MPro	70	75	AGNVQL			5	601.33	Mpro	1	210407_M_60sec_01	1	4.07808	60710	603.674
MPro	70	75	AGNVQL			5	601.33	Mpro	1	210407_M_60sec_03	1	4.08002	66516	604.026
MPro	70	75	AGNVQL			5	601.33	Mpro	5	210407_M_300sec_01	1	4.07811	58354	604.098
MPro	70	75	AGNVQL			5	601.33	Mpro	5	210407_M_300sec_02	1	4.07724	62181	604.094
MPro	70	75	AGNVQL			5	601.33	Mpro	5	210407_M_300sec_03	1	4.08179	75009	603.829
MPro	70	75	AGNVQL			5	601.33	Mpro	30	210407_M_1800sec_01	1	4.07601	60839	604.109
MPro	70	75	AGNVQL			5	601.33	Mpro	30	210407_M_1800sec_02	1	4.07559	67083	604.3
MPro	70	75	AGNVQL			5	601.33	Mpro	30	210407_M_1800sec_03	1	4.072	69119	604.35
MPro	70	75	AGNVQL			5	601.33	Mpro	120	210407_M_7200sec_01	1	4.07533	65832	604.204
MPro	70	75	AGNVQL			5	601.33	Mpro	120	210407_M_7200sec_03	1	4.07689	24595	604.364
MPro	70	75	AGNVQL			5	601.33	Mpro+PPACK	0	DE-2021-04-07 M m0 2	1	4.09108	36136	601.588
MPro	70	75	AGNVQL			5	601.33	Mpro+PPACK	0	DE-2021-04-07 M m0 3	1	4.08766	51061	601.556
MPro	70	75	AGNVQL			5	601.33	Mpro+PPACK	0	DE-2021-04-07 M m0 4	1	4.08011	70717	601.557
MPro	70	75	AGNVQL			5	601.33	Mpro+PPACK	0.25	210407_M_P_15sec_01	1	4.07338	36668	603.29
MPro	70	75	AGNVQL			5	601.33	Mpro+PPACK	0.25	210407_M_P_15sec_02	1	4.07451	35363	603.363
MPro	70	75	AGNVQL			5	601.33	Mpro+PPACK	0.25	210407_M_P_15sec_03	1	4.07336	34968	603.347
MPro	70	75	AGNVQL			5	601.33	Mpro+PPACK	1	210407_M_P_60sec_01	1	4.07512	12963	603.828
MPro	70	75	AGNVQL			5	601.33	Mpro+PPACK	1	210407_M_P_60sec_02	1	4.07064	41786	603.795
MPro	70	75	AGNVQL			5	601.33	Mpro+PPACK	1	210407_M_P_60sec_03	1	4.07479	32895	603.822
MPro	70	75	AGNVQL			5	601.33	Mpro+PPACK	5	210407_M_P_300sec_01	1	4.06736	16513	603.888
MPro	70	75	AGNVQL			5	601.33	Mpro+PPACK	5	210407_M_P_300sec_02	1	4.0724	37044	603.908
MPro	70	75	AGNVQL			5	601.33	Mpro+PPACK	5	210407_M_P_300sec_03	1	4.07089	36440	604.033
MPro	70	75	AGNVQL			5	601.33	Mpro+PPACK	30	210407_M_P_1800sec_01	1	4.06752	30736	604.403
MPro	70	75	AGNVQL			5	601.33	Mpro+PPACK	30	210407_M_P_1800sec_03	1	4.07173	22129	604.303
MPro	70	75	AGNVQL			5	601.33	Mpro+PPACK	120	210407_M_P_7200sec_01	1	4.07128	22130	604.278
MPro	70	75	AGNVQL			5	601.33	Mpro+PPACK	120	210407_M_P_7200sec_02	1	4.06958	20430	604.329
MPro	70	75	AGNVQL			5	601.33	Mpro+PPACK	120	210407_M_P_7200sec_03	1	4.07528	15040	604.763
MPro	68	75	VQAGNVQL			7	828.457	Mpro	0	DE-2021-04-07 M m0 2	2	4.38685	92886	414.923
MPro	68	75	VQAGNVQL			7	828.457	Mpro	0	DE-2021-04-07 M m0 3	2	4.3808	120849	414.934
MPro	68	75	VQAGNVQL			7	828.457	Mpro	0	DE-2021-04-07 M m0 4	2	4.37799	163819	414.915
MPro	68	75	VQAGNVQL			7	828.457	Mpro	0.25	210407_M_15sec_01	2	4.37648	131692	415.871
MPro	68	75	VQAGNVQL			7	828.457	Mpro	0.25	210407_M_15sec_02	2	4.38368	132391	415.978
MPro	68	75	VQAGNVQL			7	828.457	Mpro	0.25	210407_M_15sec_03	2	4.37931	94883	415.935
MPro	68	75	VQAGNVQL			7	828.457	Mpro	1	210407_M_60sec_01	2	4.37251	138877	416.196
MPro	68	75	VQAGNVQL			7	828.457	Mpro	1	210407_M_60sec_02	2	4.37748	193291	416.154
MPro	68	75	VQAGNVQL			7	828.457	Mpro	1	210407_M_60sec_03	2	4.37334	192522	416.191
MPro	68	75	VQAGNVQL			7	828.457	Mpro	5	210407_M_300sec_01	2	4.37246	156493	416.399
MPro	68	75	VQAGNVQL			7	828.457	Mpro	5	210407_M_300sec_02	2	4.37225	175969	416.388
MPro	68	75	VQAGNVQL			7	828.457	Mpro	5	210407_M_300sec_03	2	4.37785	160874	416.381
MPro	68	75	VQAGNVQL			7	828.457	Mpro	30	210407_M_1800sec_01	2	4.37244	160789	416.541
MPro	68	75	VQAGNVQL			7	828.457	Mpro	30	210407_M_1800sec_02	2	4.37096	155673	416.624
MPro	68	75	VQAGNVQL			7	828.457	Mpro	30	210407_M_1800sec_03	2	4.37065	167171	416.536
MPro	68	75	VQAGNVQL			7	828.457	Mpro	120	210407_M_7200sec_01	2	4.37358	159076	416.594
MPro	68	75	VQAGNVQL			7	828.457	Mpro	120	210407_M_7200sec_02	2	4.37211	155091	416.567
MPro	68	75	VQAGNVQL			7	828.457	Mpro	120	210407_M_7200sec_03	2	4.36885	76225	416.522
MPro	68	75	VQAGNVQL			7	828.457	Mpro+PPACK	0	DE-2021-04-07 M m0 2	2	4.38685	92886	414.923
MPro	68	75	VQAGNVQL			7	828.457	Mpro+PPACK	0	DE-2021-04-07 M m0 3	2	4.3808	120849	414.934
MPro	68	75	VQAGNVQL			7	828.457	Mpro+PPACK	0	DE-2021-04-07 M m0 4	2	4.37799	163819	414.915
MPro	68	75	VQAGNVQL			7	828.457	Mpro+PPACK	0.25	210407_M_P_15sec_01	2	4.37645	81961	416.018
MPro	68	75	VQAGNVQL			7	828.457	Mpro+PPACK	0.25	210407_M_P_15sec_02	2	4.37495	82812	416.066
MPro	68	75	VQAGNVQL			7	828.457	Mpro+PPACK	0.25	210407_M_P_15sec_03	2	4.37435	76940	416.041
MPro	68	75	VQAGNVQL			7	828.457	Mpro+PPACK	1	210407_M_P_60sec_01	2	4.37739	44317	416.255
MPro	68	75	VQAGNVQL			7	828.457	Mpro+PPACK	1	210407_M_P_60sec_02	2	4.3747	96766	416.376
MPro	68	75	VQAGNVQL			7	828.457	Mpro+PPACK	1	210407_M_P_60sec_03	2	4.37614	73840	416.325
MPro	68	75	VQAGNVQL			7	828.457	Mpro+PPACK	5	210407_M_P_300sec_01	2	4.36988	57401	416.245
MPro	68	75	VQAGNVQL			7	828.457	Mpro+PPACK	5	210407_M_P_300sec_02	2	4.37512	86820	416.351
MPro	68	75	VQAGNVQL			7	828.457	Mpro+PPACK	5	210407_M_P_300sec_03	2	4.37286	82623	416.332
MPro	68	75	VQAGNVQL			7	828.457	Mpro+PPACK	30	210407_M_P_1800sec_01	2	4.37085	45680	416.482
MPro	68	75	VQAGNVQL			7	828.457	Mpro+PPACK	30	210407_M_P_1800sec_02	2	4.37448	40953	416.501
MPro	68	75	VQAGNVQL			7	828.457	Mpro+PPACK	30	210407_M_P_1800sec_03	2	4.37644	55389	416.48
MPro	68	75	VQAGNVQL			7	828.457	Mpro+PPACK	120	210407_M_P_7200sec_01	2	4.37378	57558	416.491
MPro	68	75	VQAGNVQL			7	828.457	Mpro+PPACK	120	210407_M_P_7200sec_02	2	4.37011	45737	416.489
MPro	68	75	VQAGNVQL			7	828.457	Mpro+PPACK	120	210407_M_P_7200sec_03	2	4.37343	58175	416.502
MPro	59	67	IRKSNHNFL			8	1128.63	Mpro	0	DE-2021-04-07 M m0 2	2	3.54269	37821	565.004
MPro	59	67	IRKSNHNFL			8	1128.63	Mpro	0	DE-2021-04-07 M m0 3	2	3.53025	54714	565.088
MPro	59	67	IRKSNHNFL			8	1128.63	Mpro	0	DE-2021-04-07 M m0 4	2	3.52562	61518	565.109
MPro	59	67	IRKSNHNFL			8	1128.63	Mpro	0.25	210407_M_15sec_01	2	3.52146	67130	565.468
MPro	59	67	IRKSNHNFL			8	1128.63	Mpro	0.25	210407_M_15sec_02	2	3.53427	59632	565.467
MPro	59	67	IRKSNHNFL			8	1128.63	Mpro	0.25	210407_M_15sec_03	2	3.52769	40702	565.46
MPro	59	67	IRKSNHNFL			8	1128.63	Mpro	1	210407_M_60sec_01	2	3.523	68601	565.637
MPro	59	67	IRKSNHNFL			8	1128.63	Mpro	1	210407_M_60sec_02	2	3.5285	87369	565.639
MPro	59	67	IRKSNHNFL			8	1128.63	Mpro	1	210407_M_60sec_03	2	3.53	87833	565.651
MPro	59	67	IRKSNHNFL			8	1128.63	Mpro	5	210407_M_300sec_01	2	3.52923	69828	565.617
MPro	59	67	IRKSNHNFL			8	1128.63	Mpro	5	210407_M_300sec_02	2	3.53034	72464	565.613
MPro	59	67	IRKSNHNFL			8	1128.63	Mpro	5	210407_M_300sec_03	2	3.53476	76817	565.695
MPro	59	67	IRKSNHNFL			8	1128.63	Mpro	30	210407_M_1800sec_01	2	3.52981	64569	565.691
MPro	59	67	IRKSNHNFL			8	1128.63	Mpro	30	210407_M_1800sec_02	2	3.53425	76784	565.712
MPro	59	67	IRKSNHNFL			8	1128.63	Mpro	30	210407_M_1800sec_03	2	3.52126	71728	565.599
MPro	59	67	IRKSNHNFL			8	1128.63	Mpro	120	210407_M_7200sec_01	2	3.5325	70539	565.735
MPro	59	67	IRKSNHNFL			8	1128.63	Mpro	120	210407_M_7200sec_02	2	3.53146	68481	565.73
MPro	59	67	IRKSNHNFL			8	1128.63	Mpro	120	210407_M_7200sec_03	2	3.54562	22665	565.763
MPro	59	67	IRKSNHNFL			8	1128.63	Mpro+PPACK	0	DE-2021-04-07 M m0 2	2	3.54269	37821	565.004
MPro	59	67	IRKSNHNFL			8	1128.63	Mpro+PPACK	0	DE-2021-04-07 M m0 3	2	3.53025	54714	565.088
MPro	59	67	IRKSNHNFL			8	1128.63	Mpro+PPACK	0	DE-2021-04-07 M m0 4	2	3.52562	61518	565.109
MPro	59	67	IRKSNHNFL			8	1128.63	Mpro+PPACK	0.25	210407_M_P_15sec_01	2	3.47298	33156	565.365
MPro	59	67	IRKSNHNFL			8	1128.63	Mpro+PPACK	0.25	210407_M_P_15sec_02	2	3.46327	41085	565.452
MPro	59	67	IRKSNHNFL			8	1128.63	Mpro+PPACK	0.25	210407_M_P_15sec_03	2	3.46965	32067	565.328
MPro	59	67	IRKSNHNFL			8	1128.63	Mpro+PPACK	1	210407_M_P_60sec_01	2	3.46114	11037	565.565
MPro	59	67	IRKSNHNFL			8	1128.63	Mpro+PPACK	1	210407_M_P_60sec_02	2	3.4601	37894	565.549
MPro	59	67	IRKSNHNFL			8	1128.63	Mpro+PPACK	1	210407_M_P_60sec_03	2	3.46114	30911	565.563
MPro	59	67	IRKSNHNFL			8	1128.63	Mpro+PPACK	5	210407_M_P_300sec_01	2	3.46415	20930	565.769
MPro	59	67	IRKSNHNFL			8	1128.63	Mpro+PPACK	5	210407_M_P_300sec_02	2	3.46655	35107	565.536
MPro	59	67	IRKSNHNFL			8	1128.63	Mpro+PPACK	5	210407_M_P_300sec_03	2	3.46709	29729	565.697
MPro	59	67	IRKSNHNFL			8	1128.63	Mpro+PPACK	30	210407_M_P_1800sec_01	2	3.47242	37097	565.606
MPro	59	67	IRKSNHNFL			8	1128.63	Mpro+PPACK	30	210407_M_P_1800sec_02	2	3.47939	12608	565.524
MPro	59	67	IRKSNHNFL			8	1128.63	Mpro+PPACK	30	210407_M_P_1800sec_03	2	3.48028	14718	565.533
MPro	59	67	IRKSNHNFL			8	1128.63	Mpro+PPACK	120	210407_M_P_7200sec_01	2	3.48867	20617	565.823
MPro	59	67	IRKSNHNFL			8	1128.63	Mpro+PPACK	120	210407_M_P_7200sec_02	2	3.48633	14004	565.6
MPro	59	67	IRKSNHNFL			8	1128.63	Mpro+PPACK	120	210407_M_P_7200sec_03	2	3.4848	14241	565.561
MPro	48	57	DMLNPNYEDL			8	1223.52	Mpro	0	DE-2021-04-07 M m0 2	2	5.65918	214086	612.614
MPro	48	57	DMLNPNYEDL			8	1223.52	Mpro	0	DE-2021-04-07 M m0 3	2	5.65842	297917	612.595
MPro	48	57	DMLNPNYEDL			8	1223.52	Mpro	0	DE-2021-04-07 M m0 4	2	5.65547	400077	612.616
MPro	48	57	DMLNPNYEDL			8	1223.52	Mpro	0.25	210407_M_15sec_01	2	5.65369	332249	613.826
MPro	48	57	DMLNPNYEDL			8	1223.52	Mpro	0.25	210407_M_15sec_02	2	5.66015	331494	613.813
MPro	48	57	DMLNPNYEDL			8	1223.52	Mpro	0.25	210407_M_15sec_03	2	5.6557	246454	613.811
MPro	48	57	DMLNPNYEDL			8	1223.52	Mpro	1	210407_M_60sec_01	2	5.64899	374859	613.885
MPro	48	57	DMLNPNYEDL			8	1223.52	Mpro	1	210407_M_60sec_02	2	5.64981	494878	613.901
MPro	48	57	DMLNPNYEDL			8	1223.52	Mpro	1	210407_M_60sec_03	2	5.64789	460950	613.892
MPro	48	57	DMLNPNYEDL			8	1223.52	Mpro	5	210407_M_300sec_01	2	5.6474	423079	613.851
MPro	48	57	DMLNPNYEDL			8	1223.52	Mpro	5	210407_M_300sec_02	2	5.64793	417490	613.83
MPro	48	57	DMLNPNYEDL			8	1223.52	Mpro	5	210407_M_300sec_03	2	5.64804	426947	613.867
MPro	48	57	DMLNPNYEDL			8	1223.52	Mpro	30	210407_M_1800sec_01	2	5.64299	394304	613.981
MPro	48	57	DMLNPNYEDL			8	1223.52	Mpro	30	210407_M_1800sec_02	2	5.64916	383948	613.958
MPro	48	57	DMLNPNYEDL			8	1223.52	Mpro	30	210407_M_1800sec_03	2	5.64076	411550	613.984
MPro	48	57	DMLNPNYEDL			8	1223.52	Mpro	120	210407_M_7200sec_01	2	5.65097	357411	614.046
MPro	48	57	DMLNPNYEDL			8	1223.52	Mpro	120	210407_M_7200sec_02	2	5.64385	330487	613.894
MPro	48	57	DMLNPNYEDL			8	1223.52	Mpro	120	210407_M_7200sec_03	2	5.64202	178767	613.922
MPro	48	57	DMLNPNYEDL			8	1223.52	Mpro+PPACK	0	DE-2021-04-07 M m0 2	2	5.65918	214086	612.614
MPro	48	57	DMLNPNYEDL			8	1223.52	Mpro+PPACK	0	DE-2021-04-07 M m0 3	2	5.65842	297917	612.595
MPro	48	57	DMLNPNYEDL			8	1223.52	Mpro+PPACK	0	DE-2021-04-07 M m0 4	2	5.65547	400077	612.616
MPro	48	57	DMLNPNYEDL			8	1223.52	Mpro+PPACK	0.25	210407_M_P_15sec_01	2	5.65509	212893	613.649
MPro	48	57	DMLNPNYEDL			8	1223.52	Mpro+PPACK	0.25	210407_M_P_15sec_02	2	5.65456	229558	613.794
MPro	48	57	DMLNPNYEDL			8	1223.52	Mpro+PPACK	0.25	210407_M_P_15sec_03	2	5.64933	223864	613.73
MPro	48	57	DMLNPNYEDL			8	1223.52	Mpro+PPACK	1	210407_M_P_60sec_01	2	5.64965	109118	613.766
MPro	48	57	DMLNPNYEDL			8	1223.52	Mpro+PPACK	1	210407_M_P_60sec_02	2	5.64871	218748	613.88
MPro	48	57	DMLNPNYEDL			8	1223.52	Mpro+PPACK	1	210407_M_P_60sec_03	2	5.65121	168641	613.84
MPro	48	57	DMLNPNYEDL			8	1223.52	Mpro+PPACK	5	210407_M_P_300sec_01	2	5.64639	129070	613.607
MPro	48	57	DMLNPNYEDL			8	1223.52	Mpro+PPACK	5	210407_M_P_300sec_02	2	5.65464	230541	613.738
MPro	48	57	DMLNPNYEDL			8	1223.52	Mpro+PPACK	5	210407_M_P_300sec_03	2	5.64699	210998	613.713
MPro	48	57	DMLNPNYEDL			8	1223.52	Mpro+PPACK	30	210407_M_P_1800sec_01	2	5.64542	192527	613.814
MPro	48	57	DMLNPNYEDL			8	1223.52	Mpro+PPACK	30	210407_M_P_1800sec_02	2	5.65029	106591	613.692
MPro	48	57	DMLNPNYEDL			8	1223.52	Mpro+PPACK	30	210407_M_P_1800sec_03	2	5.65352	131963	613.756
MPro	48	57	DMLNPNYEDL			8	1223.52	Mpro+PPACK	120	210407_M_P_7200sec_01	2	5.64606	159771	613.888
MPro	48	57	DMLNPNYEDL			8	1223.52	Mpro+PPACK	120	210407_M_P_7200sec_02	2	5.64604	146999	613.834
MPro	48	57	DMLNPNYEDL			8	1223.52	Mpro+PPACK	120	210407_M_P_7200sec_03	2	5.65766	139951	613.739
MPro	49	57	MLNPNYEDL			7	1108.5	Mpro	0	DE-2021-04-07 M m0 2	1	5.26375	49789	1109.08
MPro	49	57	MLNPNYEDL			7	1108.5	Mpro	0	DE-2021-04-07 M m0 3	1	5.25878	66790	1109.25
MPro	49	57	MLNPNYEDL			7	1108.5	Mpro	0	DE-2021-04-07 M m0 4	1	5.25296	79460	1109.21
MPro	49	57	MLNPNYEDL			7	1108.5	Mpro	0.25	210407_M_15sec_01	1	5.25052	59360	1112.23
MPro	49	57	MLNPNYEDL			7	1108.5	Mpro	0.25	210407_M_15sec_02	1	5.26472	62768	1112.07
MPro	49	57	MLNPNYEDL			7	1108.5	Mpro	0.25	210407_M_15sec_03	1	5.25625	44336	1112.04
MPro	49	57	MLNPNYEDL			7	1108.5	Mpro	1	210407_M_60sec_01	1	5.25138	73739	1112.12
MPro	49	57	MLNPNYEDL			7	1108.5	Mpro	1	210407_M_60sec_02	1	5.25347	91641	1112.25
MPro	49	57	MLNPNYEDL			7	1108.5	Mpro	1	210407_M_60sec_03	1	5.25149	87977	1112.16
MPro	49	57	MLNPNYEDL			7	1108.5	Mpro	5	210407_M_300sec_01	1	5.25322	71385	1112.21
MPro	49	57	MLNPNYEDL			7	1108.5	Mpro	5	210407_M_300sec_02	1	5.25218	85906	1112.13
MPro	49	57	MLNPNYEDL			7	1108.5	Mpro	5	210407_M_300sec_03	1	5.25303	76542	1112.19
MPro	49	57	MLNPNYEDL			7	1108.5	Mpro	30	210407_M_1800sec_01	1	5.24754	69693	1112.78
MPro	49	57	MLNPNYEDL			7	1108.5	Mpro	30	210407_M_1800sec_02	1	5.2482	65640	1112.71
MPro	49	57	MLNPNYEDL			7	1108.5	Mpro	30	210407_M_1800sec_03	1	5.25118	74550	1112.48
MPro	49	57	MLNPNYEDL			7	1108.5	Mpro	120	210407_M_7200sec_01	1	5.24992	64512	1112.9
MPro	49	57	MLNPNYEDL			7	1108.5	Mpro	120	210407_M_7200sec_02	1	5.24551	68883	1112.9
MPro	49	57	MLNPNYEDL			7	1108.5	Mpro	120	210407_M_7200sec_03	1	5.25024	24426	1112.94
MPro	49	57	MLNPNYEDL			7	1108.5	Mpro+PPACK	0	DE-2021-04-07 M m0 2	1	5.26375	49789	1109.08
MPro	49	57	MLNPNYEDL			7	1108.5	Mpro+PPACK	0	DE-2021-04-07 M m0 3	1	5.25878	66790	1109.25
MPro	49	57	MLNPNYEDL			7	1108.5	Mpro+PPACK	0	DE-2021-04-07 M m0 4	1	5.25296	79460	1109.21
MPro	49	57	MLNPNYEDL			7	1108.5	Mpro+PPACK	0.25	210407_M_P_15sec_01	1	5.25527	48063	1112.17
MPro	49	57	MLNPNYEDL			7	1108.5	Mpro+PPACK	0.25	210407_M_P_15sec_02	1	5.25629	51769	1112.09
MPro	49	57	MLNPNYEDL			7	1108.5	Mpro+PPACK	0.25	210407_M_P_15sec_03	1	5.25519	44293	1112.21
MPro	49	57	MLNPNYEDL			7	1108.5	Mpro+PPACK	1	210407_M_P_60sec_01	1	5.25362	18663	1112.45
MPro	49	57	MLNPNYEDL			7	1108.5	Mpro+PPACK	1	210407_M_P_60sec_02	1	5.25406	48386	1112.26
MPro	49	57	MLNPNYEDL			7	1108.5	Mpro+PPACK	1	210407_M_P_60sec_03	1	5.262	36515	1111.85
MPro	49	57	MLNPNYEDL			7	1108.5	Mpro+PPACK	5	210407_M_P_300sec_01	1	5.25914	30284	1111.67
MPro	49	57	MLNPNYEDL			7	1108.5	Mpro+PPACK	5	210407_M_P_300sec_02	1	5.25692	51680	1112.06
MPro	49	57	MLNPNYEDL			7	1108.5	Mpro+PPACK	5	210407_M_P_300sec_03	1	5.25412	39499	1112.31
MPro	49	57	MLNPNYEDL			7	1108.5	Mpro+PPACK	30	210407_M_P_1800sec_01	1	5.25143	35022	1112.09
MPro	49	57	MLNPNYEDL			7	1108.5	Mpro+PPACK	30	210407_M_P_1800sec_02	1	5.25711	16018	1112.61
MPro	49	57	MLNPNYEDL			7	1108.5	Mpro+PPACK	30	210407_M_P_1800sec_03	1	5.25682	26190	1112.48
MPro	49	57	MLNPNYEDL			7	1108.5	Mpro+PPACK	120	210407_M_P_7200sec_01	1	5.25604	25649	1112.17
MPro	49	57	MLNPNYEDL			7	1108.5	Mpro+PPACK	120	210407_M_P_7200sec_02	1	5.25166	25867	1112.85
MPro	49	57	MLNPNYEDL			7	1108.5	Mpro+PPACK	120	210407_M_P_7200sec_03	1	5.25546	26629	1112.65
MPro	35	45	VVYCPRHVICT			9	1289.65	Mpro	0	DE-2021-04-07 M m0 2	2	4.00396	37395	645.747
MPro	35	45	VVYCPRHVICT			9	1289.65	Mpro	0	DE-2021-04-07 M m0 2	3	4.00768	61533	430.747
MPro	35	45	VVYCPRHVICT			9	1289.65	Mpro	0	DE-2021-04-07 M m0 3	2	3.99405	64999	645.756
MPro	35	45	VVYCPRHVICT			9	1289.65	Mpro	0	DE-2021-04-07 M m0 3	3	3.99344	111183	430.782
MPro	35	45	VVYCPRHVICT			9	1289.65	Mpro	0	DE-2021-04-07 M m0 4	2	3.98925	79178	645.685
MPro	35	45	VVYCPRHVICT			9	1289.65	Mpro	0	DE-2021-04-07 M m0 4	3	3.99229	166331	430.816
MPro	35	45	VVYCPRHVICT			9	1289.65	Mpro	0.25	210407_M_15sec_01	2	3.98988	85328	646.188
MPro	35	45	VVYCPRHVICT			9	1289.65	Mpro	0.25	210407_M_15sec_01	3	3.98972	140487	431.108
MPro	35	45	VVYCPRHVICT			9	1289.65	Mpro	0.25	210407_M_15sec_02	2	3.99857	74908	646.223
MPro	35	45	VVYCPRHVICT			9	1289.65	Mpro	0.25	210407_M_15sec_02	3	3.99978	134128	431.127
MPro	35	45	VVYCPRHVICT			9	1289.65	Mpro	0.25	210407_M_15sec_03	2	3.99581	61241	646.23
MPro	35	45	VVYCPRHVICT			9	1289.65	Mpro	0.25	210407_M_15sec_03	3	3.99143	105037	431.114
MPro	35	45	VVYCPRHVICT			9	1289.65	Mpro	1	210407_M_60sec_01	2	3.98878	78458	646.208
MPro	35	45	VVYCPRHVICT			9	1289.65	Mpro	1	210407_M_60sec_01	3	3.98778	140653	431.154
MPro	35	45	VVYCPRHVICT			9	1289.65	Mpro	1	210407_M_60sec_02	1	3.99184	9679	1291.1
MPro	35	45	VVYCPRHVICT			9	1289.65	Mpro	1	210407_M_60sec_02	2	3.99134	105727	646.239
MPro	35	45	VVYCPRHVICT			9	1289.65	Mpro	1	210407_M_60sec_02	3	3.9921	201148	431.133
MPro	35	45	VVYCPRHVICT			9	1289.65	Mpro	1	210407_M_60sec_03	1	3.99078	9425	1291.1
MPro	35	45	VVYCPRHVICT			9	1289.65	Mpro	1	210407_M_60sec_03	2	3.98553	111674	646.21
MPro	35	45	VVYCPRHVICT			9	1289.65	Mpro	1	210407_M_60sec_03	3	3.98721	219333	431.174
MPro	35	45	VVYCPRHVICT			9	1289.65	Mpro	5	210407_M_300sec_01	1	3.98786	8257	1291.05
MPro	35	45	VVYCPRHVICT			9	1289.65	Mpro	5	210407_M_300sec_01	2	3.98504	89461	646.246
[truncated: 525 more rows]

## Sheet: uptake_data
Protein	Start	End	Sequence	Modification	Fragment	MaxUptake	MHP	State	Exposure_min	Center	Center SD	Uptake	Uptake SD	RT_min	RT SD
MPro	1	17	SGFRKMAFPSGKVEGCM			15	1831.87	Mpro	0	1833.08	0.038974	0	0	4.60976	0.005496
MPro	1	17	SGFRKMAFPSGKVEGCM			15	1831.87	Mpro	0.25	1836.03	0.244767	2.95279	0.247851	4.60672	0.003517
MPro	1	17	SGFRKMAFPSGKVEGCM			15	1831.87	Mpro	1	1836.42	0.272428	3.34506	0.275202	4.60114	0.001307
MPro	1	17	SGFRKMAFPSGKVEGCM			15	1831.87	Mpro	5	1836.72	0.224677	3.64268	0.228033	4.60346	0.003815
MPro	1	17	SGFRKMAFPSGKVEGCM			15	1831.87	Mpro	30	1837.24	0.269107	4.16387	0.271915	4.60216	0.002263
MPro	1	17	SGFRKMAFPSGKVEGCM			15	1831.87	Mpro	120	1838.14	0.461971	5.06072	0.463612	4.60352	0.000917
MPro	1	17	SGFRKMAFPSGKVEGCM			15	1831.87	Mpro+PPACK	0	1833.08	0.038974	0	0	4.60976	0.005496
MPro	1	17	SGFRKMAFPSGKVEGCM			15	1831.87	Mpro+PPACK	0.25	1840.26	0.563376	7.18214	0.564722	4.60383	0.006722
MPro	1	17	SGFRKMAFPSGKVEGCM			15	1831.87	Mpro+PPACK	1	1840.53	0.669982	7.45318	0.671114	4.60698	0.008507
MPro	1	17	SGFRKMAFPSGKVEGCM			15	1831.87	Mpro+PPACK	5	1839.92	0.885475	6.83688	0.886332	4.60559	0.008126
MPro	1	17	SGFRKMAFPSGKVEGCM			15	1831.87	Mpro+PPACK	30	1839.82	0.753401	6.74523	0.754408	4.60642	0.009644
MPro	1	17	SGFRKMAFPSGKVEGCM			15	1831.87	Mpro+PPACK	120	1839.63	0.843542	6.55015	0.844442	4.61059	0.009399
MPro	4	17	RKMAFPSGKVEGCM			12	1540.74	Mpro	0	1541.8	0.020718	0	0	4.11627	0.006351
MPro	4	17	RKMAFPSGKVEGCM			12	1540.74	Mpro	0.25	1543.81	0.017393	2.01344	0.027051	4.11269	0.00488
MPro	4	17	RKMAFPSGKVEGCM			12	1540.74	Mpro	1	1543.99	0.153267	2.19566	0.154661	4.11369	0.001687
MPro	4	17	RKMAFPSGKVEGCM			12	1540.74	Mpro	5	1544.18	0.058265	2.38748	0.061838	4.11432	0.00162
MPro	4	17	RKMAFPSGKVEGCM			12	1540.74	Mpro	30	1544.5	0.025107	2.70755	0.032551	4.11146	0.000352
MPro	4	17	RKMAFPSGKVEGCM			12	1540.74	Mpro	120	1545.82	0.226167	4.02398	0.227114	4.11756	0.00059
MPro	4	17	RKMAFPSGKVEGCM			12	1540.74	Mpro+PPACK	0	1541.8	0.020718	0	0	4.11627	0.006351
MPro	4	17	RKMAFPSGKVEGCM			12	1540.74	Mpro+PPACK	0.25	1547.91	0.316117	6.11534	0.316795	4.11515	0.001447
MPro	4	17	RKMAFPSGKVEGCM			12	1540.74	Mpro+PPACK	1	1548.68	0.207195	6.8865	0.208229	4.11557	0.002199
MPro	4	17	RKMAFPSGKVEGCM			12	1540.74	Mpro+PPACK	5	1548.43	0.406366	6.63326	0.406893	4.11848	0.002412
MPro	4	17	RKMAFPSGKVEGCM			12	1540.74	Mpro+PPACK	30	1548.12	0.046587	6.32352	0.050986	4.12076	0.00507
MPro	4	17	RKMAFPSGKVEGCM			12	1540.74	Mpro+PPACK	120	1548.33	0.118145	6.53638	0.119948	4.11773	0.002155
MPro	18	27	VQVTCGTTTL			9	1022.52	Mpro	0	1023.06	0.028082	0	0	4.63548	0.001671
MPro	18	27	VQVTCGTTTL			9	1022.52	Mpro	0.25	1024.4	0.027283	1.33699	0.039153	4.6368	0.003832
MPro	18	27	VQVTCGTTTL			9	1022.52	Mpro	1	1024.52	0.02946	1.46042	0.0407	4.63243	0.001118
MPro	18	27	VQVTCGTTTL			9	1022.52	Mpro	5	1024.44	0.02842	1.37794	0.039954	4.63266	0.001153
MPro	18	27	VQVTCGTTTL			9	1022.52	Mpro	30	1024.58	0.022941	1.51629	0.036261	4.62986	0.001718
MPro	18	27	VQVTCGTTTL			9	1022.52	Mpro	120	1024.69	0.040655	1.62588	0.049411	4.63069	0.000267
MPro	18	27	VQVTCGTTTL			9	1022.52	Mpro+PPACK	0	1023.06	0.028082	0	0	4.63548	0.001671
MPro	18	27	VQVTCGTTTL			9	1022.52	Mpro+PPACK	0.25	1024.41	0.040232	1.34906	0.049063	4.63672	0.000601
MPro	18	27	VQVTCGTTTL			9	1022.52	Mpro+PPACK	1	1024.46	0.087437	1.39439	0.091836	4.63975	0.001566
MPro	18	27	VQVTCGTTTL			9	1022.52	Mpro+PPACK	5	1024.34	0.099503	1.28321	0.10339	4.63654	0.001575
MPro	18	27	VQVTCGTTTL			9	1022.52	Mpro+PPACK	30	1024.48	0.089944	1.41566	0.094226	4.63712	0.002708
MPro	18	27	VQVTCGTTTL			9	1022.52	Mpro+PPACK	120	1024.54	0.022803	1.48244	0.036174	4.63781	0.000554
MPro	28	31	NGLW			3	489.246	Mpro	0	489.441	0.029213	0	0	5.63516	0.003465
MPro	28	31	NGLW			3	489.246	Mpro	0.25	489.471	0.013572	0.030015	0.032211	5.63462	0.004496
MPro	28	31	NGLW			3	489.246	Mpro	1	489.51	0.035334	0.06982	0.045846	5.62952	0.000179
MPro	28	31	NGLW			3	489.246	Mpro	5	489.462	0.00646	0.021167	0.029919	5.62712	0.001154
MPro	28	31	NGLW			3	489.246	Mpro	30	489.458	0.005036	0.017232	0.029644	5.62425	0.003145
MPro	28	31	NGLW			3	489.246	Mpro	120	489.467	0.02375	0.026076	0.037649	5.62484	0.00229
MPro	28	31	NGLW			3	489.246	Mpro+PPACK	0	489.441	0.029213	0	0	5.63516	0.003465
MPro	28	31	NGLW			3	489.246	Mpro+PPACK	0.25	489.496	0.010082	0.055024	0.030904	5.63296	0.002529
MPro	28	31	NGLW			3	489.246	Mpro+PPACK	1	489.478	0.014382	0.037318	0.032561	5.63277	0.002444
MPro	28	31	NGLW			3	489.246	Mpro+PPACK	5	489.488	0.013857	0.047179	0.032333	5.62941	0.003105
MPro	28	31	NGLW			3	489.246	Mpro+PPACK	30	489.482	0.009496	0.04107	0.030717	5.62863	0.003899
MPro	28	31	NGLW			3	489.246	Mpro+PPACK	120	489.489	0.005606	0.048558	0.029746	5.6299	0.00454
MPro	31	34	WLDD			3	548.235	Mpro	0	548.472	0.004264	0	0	4.84198	0.006424
MPro	31	34	WLDD			3	548.235	Mpro	0.25	548.56	0.01709	0.087818	0.017614	4.84059	0.00479
MPro	31	34	WLDD			3	548.235	Mpro	1	548.559	0.007774	0.087317	0.008867	4.83803	0.000295
MPro	31	34	WLDD			3	548.235	Mpro	5	548.558	0.006024	0.086485	0.00738	4.83681	0.001679
MPro	31	34	WLDD			3	548.235	Mpro	30	548.675	0.005279	0.202872	0.006786	4.83328	0.001957
MPro	31	34	WLDD			3	548.235	Mpro	120	548.76	0.015092	0.288689	0.015683	4.83405	0.00063
MPro	31	34	WLDD			3	548.235	Mpro+PPACK	0	548.472	0.004264	0	0	4.84198	0.006424
MPro	31	34	WLDD			3	548.235	Mpro+PPACK	0.25	548.567	0.007995	0.095718	0.009061	4.83915	0.000782
MPro	31	34	WLDD			3	548.235	Mpro+PPACK	1	548.597	0.002562	0.125071	0.004975	4.84034	0.001171
MPro	31	34	WLDD			3	548.235	Mpro+PPACK	5	548.595	0.008118	0.123567	0.00917	4.83694	0.001337
MPro	31	34	WLDD			3	548.235	Mpro+PPACK	30	548.677	0.008825	0.204963	0.009801	4.83744	0.003304
MPro	31	34	WLDD			3	548.235	Mpro+PPACK	120	548.783	0.022029	0.311484	0.022438	4.83612	0.002431
MPro	35	44	VVYCPRHVIC			8	1188.6	Mpro	0	1189.33	0.032465	0	0	4.1031	0.005148
MPro	35	44	VVYCPRHVIC			8	1188.6	Mpro	0.25	1189.59	0.052221	0.260164	0.06149	4.10189	0.003972
MPro	35	44	VVYCPRHVIC			8	1188.6	Mpro	1	1189.67	0.052588	0.338329	0.061801	4.0978	0.001876
MPro	35	44	VVYCPRHVIC			8	1188.6	Mpro	5	1189.81	0.052608	0.475912	0.061819	4.0966	0.001609
MPro	35	44	VVYCPRHVIC			8	1188.6	Mpro	30	1190.25	0.05539	0.923847	0.064203	4.09328	0.0007
MPro	35	44	VVYCPRHVIC			8	1188.6	Mpro	120	1190.57	0.056347	1.2392	0.06503	4.09396	0.001354
MPro	35	44	VVYCPRHVIC			8	1188.6	Mpro+PPACK	0	1189.33	0.032465	0	0	4.1031	0.005148
MPro	35	44	VVYCPRHVIC			8	1188.6	Mpro+PPACK	0.25	1189.57	0.038382	0.237087	0.050271	4.10047	0.001784
MPro	35	44	VVYCPRHVIC			8	1188.6	Mpro+PPACK	1	1189.6	0.043021	0.269964	0.053896	4.10213	0.002352
MPro	35	44	VVYCPRHVIC			8	1188.6	Mpro+PPACK	5	1189.6	0.022483	0.266051	0.03949	4.10024	0.002706
MPro	35	44	VVYCPRHVIC			8	1188.6	Mpro+PPACK	30	1189.75	0.04982	0.425236	0.059464	4.09884	0.00485
MPro	35	44	VVYCPRHVIC			8	1188.6	Mpro+PPACK	120	1189.83	0.033227	0.501442	0.046454	4.09673	0.002414
MPro	35	45	VVYCPRHVICT			9	1289.65	Mpro	0	1290.39	0.083147	0	0	3.99495	0.005725
MPro	35	45	VVYCPRHVICT			9	1289.65	Mpro	0.25	1291.36	0.04979	0.975343	0.096915	3.99401	0.004269
MPro	35	45	VVYCPRHVICT			9	1289.65	Mpro	1	1291.44	0.067585	1.04646	0.10715	3.98894	0.00236
MPro	35	45	VVYCPRHVICT			9	1289.65	Mpro	5	1291.49	0.074325	1.10606	0.111524	3.98746	0.002167
MPro	35	45	VVYCPRHVICT			9	1289.65	Mpro	30	1291.92	0.084497	1.52966	0.118546	3.98423	0.003235
MPro	35	45	VVYCPRHVICT			9	1289.65	Mpro	120	1292.18	0.102776	1.7882	0.132198	3.98173	0.002228
MPro	35	45	VVYCPRHVICT			9	1289.65	Mpro+PPACK	0	1290.39	0.083147	0	0	3.99495	0.005725
MPro	35	45	VVYCPRHVICT			9	1289.65	Mpro+PPACK	0.25	1291.14	0.053024	0.747593	0.098615	3.98918	0.002726
MPro	35	45	VVYCPRHVICT			9	1289.65	Mpro+PPACK	1	1291.22	0.131656	0.828037	0.155714	3.98975	0.00203
MPro	35	45	VVYCPRHVICT			9	1289.65	Mpro+PPACK	5	1291.1	0.10545	0.711754	0.134288	3.98935	0.003798
MPro	35	45	VVYCPRHVICT			9	1289.65	Mpro+PPACK	30	1291.18	0.127502	0.791333	0.152217	3.98658	0.001694
MPro	35	45	VVYCPRHVICT			9	1289.65	Mpro+PPACK	120	1291.18	0.05523	0.789507	0.099819	3.98822	0.003386
MPro	36	44	VYCPRHVIC			7	1089.53	Mpro	0	1090.12	0.066371	0	0	4.10157	0.0047
MPro	36	44	VYCPRHVIC			7	1089.53	Mpro	0.25	1090.46	0.047941	0.338712	0.081874	4.1003	0.004112
MPro	36	44	VYCPRHVIC			7	1089.53	Mpro	1	1090.59	0.180231	0.470426	0.192064	4.0962	0.002581
MPro	36	44	VYCPRHVIC			7	1089.53	Mpro	5	1090.79	0.19972	0.674885	0.21046	4.09326	0.001521
MPro	36	44	VYCPRHVIC			7	1089.53	Mpro	30	1091.16	0.107604	1.03978	0.126427	4.09101	0.001172
MPro	36	44	VYCPRHVIC			7	1089.53	Mpro	120	1091.37	0.027927	1.25512	0.072007	4.09176	0.000291
MPro	36	44	VYCPRHVIC			7	1089.53	Mpro+PPACK	0	1090.12	0.066371	0	0	4.10157	0.0047
MPro	36	44	VYCPRHVIC			7	1089.53	Mpro+PPACK	0.25	1090.24	0.035867	0.124461	0.075442	4.09961	0.00071
MPro	36	44	VYCPRHVIC			7	1089.53	Mpro+PPACK	1	1090.29	0.042283	0.176592	0.078695	4.0994	0.000904
MPro	36	44	VYCPRHVIC			7	1089.53	Mpro+PPACK	5	1090.27	0.01086	0.154808	0.067254	4.09844	0.00345
MPro	36	44	VYCPRHVIC			7	1089.53	Mpro+PPACK	30	1090.34	0.014912	0.228096	0.068026	4.09587	0.00507
MPro	36	44	VYCPRHVIC			7	1089.53	Mpro+PPACK	120	1090.4	0.014374	0.278508	0.06791	4.0956	0.003144
MPro	37	44	YCPRHVIC			6	990.465	Mpro	0	990.979	0.103768	0	0	4.10308	0.005177
MPro	37	44	YCPRHVIC			6	990.465	Mpro	0.25	991.194	0.088637	0.214665	0.136471	4.10304	0.003
MPro	37	44	YCPRHVIC			6	990.465	Mpro	1	991.285	0.111513	0.305969	0.152325	4.09921	0.002722
MPro	37	44	YCPRHVIC			6	990.465	Mpro	5	991.455	0.189326	0.475529	0.215898	4.09829	0.002294
MPro	37	44	YCPRHVIC			6	990.465	Mpro	30	991.768	0.200155	0.789288	0.225454	4.0955	0.002139
MPro	37	44	YCPRHVIC			6	990.465	Mpro	120	991.964	0.290991	0.985	0.308939	4.09484	0.001913
MPro	37	44	YCPRHVIC			6	990.465	Mpro+PPACK	0	990.862	0.081902	0	0	4.10325	0.005125
MPro	37	44	YCPRHVIC			6	990.465	Mpro+PPACK	0.25	990.979	0.146152	0.116513	0.167536	4.09943	0.001881
MPro	37	44	YCPRHVIC			6	990.465	Mpro+PPACK	1	991.02	0.143544	0.158274	0.165266	4.10279	0.002172
MPro	37	44	YCPRHVIC			6	990.465	Mpro+PPACK	5	991.006	0.143772	0.143968	0.165464	4.10156	0.004071
MPro	37	44	YCPRHVIC			6	990.465	Mpro+PPACK	30	991.026	0.18669	0.163583	0.203865	4.09764	0.004435
MPro	37	44	YCPRHVIC			6	990.465	Mpro+PPACK	120	991.107	0.156041	0.245419	0.176229	4.09815	0.003005
MPro	38	44	CPRHVIC			5	827.402	Mpro	0	827.689	0.124195	0	0	4.09805	0.005322
MPro	38	44	CPRHVIC			5	827.402	Mpro	0.25	828.043	0.012651	0.354234	0.124838	4.09933	0.002875
MPro	38	44	CPRHVIC			5	827.402	Mpro	1	828.029	0.004266	0.33982	0.124268	4.09725	0.00267
MPro	38	44	CPRHVIC			5	827.402	Mpro	5	828.066	0.004255	0.376503	0.124268	4.0952	0.000788
MPro	38	44	CPRHVIC			5	827.402	Mpro	30	828.242	0.044226	0.552596	0.131834	4.09122	0.001451
MPro	38	44	CPRHVIC			5	827.402	Mpro	120	828.552	0.147366	0.86293	0.19272	4.09239	0.000646
MPro	38	44	CPRHVIC			5	827.402	Mpro+PPACK	0	827.732	0.055531	0	0	4.09691	0.004671
MPro	38	44	CPRHVIC			5	827.402	Mpro+PPACK	0.25	827.776	0.042454	0.044096	0.0699	4.10086	0.001415
MPro	38	44	CPRHVIC			5	827.402	Mpro+PPACK	1	827.806	0.007232	0.073936	0.056	4.10089	0.000417
MPro	38	44	CPRHVIC			5	827.402	Mpro+PPACK	5	827.783	0.062188	0.051355	0.083373	4.09856	0.001319
MPro	38	44	CPRHVIC			5	827.402	Mpro+PPACK	30	827.826	0	0.094445	0.055531	4.09794	0
MPro	38	44	CPRHVIC			5	827.402	Mpro+PPACK	120	827.901	0	0.168778	0.055531	4.0955	0
MPro	48	57	DMLNPNYEDL			8	1223.52	Mpro	0	1224.21	0.018657	0	0	5.6573	0.00165
MPro	48	57	DMLNPNYEDL			8	1223.52	Mpro	0.25	1226.63	0.013363	2.41771	0.022949	5.65659	0.002814
MPro	48	57	DMLNPNYEDL			8	1223.52	Mpro	1	1226.78	0.012546	2.56971	0.022483	5.64891	0.000814
MPro	48	57	DMLNPNYEDL			8	1223.52	Mpro	5	1226.69	0.029989	2.4817	0.035318	5.64779	0.000282
MPro	48	57	DMLNPNYEDL			8	1223.52	Mpro	30	1226.94	0.022734	2.73246	0.029409	5.64421	0.003536
MPro	48	57	DMLNPNYEDL			8	1223.52	Mpro	120	1226.92	0.141418	2.70792	0.142643	5.64641	0.003878
MPro	48	57	DMLNPNYEDL			8	1223.52	Mpro+PPACK	0	1224.21	0.018657	0	0	5.6573	0.00165
MPro	48	57	DMLNPNYEDL			8	1223.52	Mpro+PPACK	0.25	1226.45	0.118323	2.23561	0.119785	5.65297	0.002598
MPro	48	57	DMLNPNYEDL			8	1223.52	Mpro+PPACK	1	1226.68	0.087788	2.46593	0.089748	5.64976	0.001096
MPro	48	57	DMLNPNYEDL			8	1223.52	Mpro+PPACK	5	1226.39	0.101701	2.18137	0.103398	5.64995	0.003871
MPro	48	57	DMLNPNYEDL			8	1223.52	Mpro+PPACK	30	1226.52	0.098706	2.31476	0.100454	5.6491	0.003517
MPro	48	57	DMLNPNYEDL			8	1223.52	Mpro+PPACK	120	1226.64	0.123049	2.42991	0.124455	5.64969	0.005384
MPro	49	57	MLNPNYEDL			7	1108.5	Mpro	0	1109.19	0.066541	0	0	5.25768	0.004338
MPro	49	57	MLNPNYEDL			7	1108.5	Mpro	0.25	1112.12	0.085183	2.92698	0.108092	5.2574	0.006121
MPro	49	57	MLNPNYEDL			7	1108.5	Mpro	1	1112.18	0.051194	2.99105	0.083955	5.25217	0.000975
MPro	49	57	MLNPNYEDL			7	1108.5	Mpro	5	1112.17	0.033384	2.98431	0.074446	5.25278	0.000459
MPro	49	57	MLNPNYEDL			7	1108.5	Mpro	30	1112.65	0.127037	3.46029	0.143409	5.24904	0.001612
MPro	49	57	MLNPNYEDL			7	1108.5	Mpro	120	1112.91	0.01703	3.7147	0.068686	5.24805	0.002231
MPro	49	57	MLNPNYEDL			7	1108.5	Mpro+PPACK	0	1109.19	0.066541	0	0	5.25768	0.004338
MPro	49	57	MLNPNYEDL			7	1108.5	Mpro+PPACK	0.25	1112.16	0.051947	2.96467	0.084417	5.25561	0.000507
MPro	49	57	MLNPNYEDL			7	1108.5	Mpro+PPACK	1	1112.15	0.231379	2.96057	0.240757	5.25678	0.003856
MPro	49	57	MLNPNYEDL			7	1108.5	Mpro+PPACK	5	1112.04	0.241768	2.85212	0.250757	5.25656	0.001913
MPro	49	57	MLNPNYEDL			7	1108.5	Mpro+PPACK	30	1112.33	0.221876	3.14063	0.231639	5.25444	0.002739
MPro	49	57	MLNPNYEDL			7	1108.5	Mpro+PPACK	120	1112.56	0.281678	3.36643	0.289431	5.25439	0.001937
MPro	59	67	IRKSNHNFL			8	1128.63	Mpro	0	1129.14	0.083406	0	0	3.53146	0.006714
MPro	59	67	IRKSNHNFL			8	1128.63	Mpro	0.25	1129.92	0.006333	0.780516	0.083647	3.52754	0.005562
MPro	59	67	IRKSNHNFL			8	1128.63	Mpro	1	1130.28	0.012207	1.13336	0.084295	3.5275	0.002882
MPro	59	67	IRKSNHNFL			8	1128.63	Mpro	5	1130.28	0.076665	1.13487	0.113288	3.53153	0.002412
MPro	59	67	IRKSNHNFL			8	1128.63	Mpro	30	1130.33	0.098889	1.18343	0.129367	3.52853	0.005482
MPro	59	67	IRKSNHNFL			8	1128.63	Mpro	120	1130.47	0.021661	1.32254	0.086173	3.5339	0.004756
MPro	59	67	IRKSNHNFL			8	1128.63	Mpro+PPACK	0	1129.14	0.083406	0	0	3.53146	0.006714
MPro	59	67	IRKSNHNFL			8	1128.63	Mpro+PPACK	0.25	1129.77	0.106293	0.62269	0.135111	3.46822	0.004145
MPro	59	67	IRKSNHNFL			8	1128.63	Mpro+PPACK	1	1130.11	0.014389	0.962466	0.084638	3.46065	0.000521
MPro	59	67	IRKSNHNFL			8	1128.63	Mpro+PPACK	5	1130.29	0.195476	1.14558	0.212527	3.46615	0.001161
MPro	59	67	IRKSNHNFL			8	1128.63	Mpro+PPACK	30	1130.14	0.076459	0.994663	0.113149	3.47558	0.003692
MPro	59	67	IRKSNHNFL			8	1128.63	Mpro+PPACK	120	1130.36	0.24184	1.21426	0.255819	3.48687	0.001644
MPro	68	75	VQAGNVQL			7	828.457	Mpro	0	828.839	0.016032	0	0	4.38107	0.003514
MPro	68	75	VQAGNVQL			7	828.457	Mpro	0.25	830.847	0.092801	2.00865	0.094176	4.37989	0.003105
MPro	68	75	VQAGNVQL			7	828.457	Mpro	1	831.35	0.038098	2.51159	0.041333	4.37464	0.002187
MPro	68	75	VQAGNVQL			7	828.457	Mpro	5	831.771	0.01446	2.93181	0.02159	4.37414	0.00258
MPro	68	75	VQAGNVQL			7	828.457	Mpro	30	832.125	0.079899	3.28579	0.081492	4.37134	0.000783
MPro	68	75	VQAGNVQL			7	828.457	Mpro	120	832.131	0.052582	3.29236	0.054972	4.37207	0.001719
MPro	68	75	VQAGNVQL			7	828.457	Mpro+PPACK	0	828.839	0.016032	0	0	4.38107	0.003514
MPro	68	75	VQAGNVQL			7	828.457	Mpro+PPACK	0.25	831.076	0.039793	2.23706	0.042901	4.37527	0.000882
MPro	68	75	VQAGNVQL			7	828.457	Mpro+PPACK	1	831.66	0.092143	2.82155	0.093528	4.37575	0.00105
MPro	68	75	VQAGNVQL			7	828.457	Mpro+PPACK	5	831.627	0.086051	2.78828	0.087532	4.37297	0.002045
MPro	68	75	VQAGNVQL			7	828.457	Mpro+PPACK	30	831.966	0.018115	3.12705	0.024191	4.37408	0.002361
MPro	68	75	VQAGNVQL			7	828.457	Mpro+PPACK	120	831.981	0.011461	3.14188	0.019707	4.37261	0.001583
MPro	70	75	AGNVQL			5	601.33	Mpro	0	601.564	0.013122	0	0	4.08506	0.004631
MPro	70	75	AGNVQL			5	601.33	Mpro	0.25	603.347	0.075867	1.78344	0.076994	4.08409	0.004037
MPro	70	75	AGNVQL			5	601.33	Mpro	1	603.858	0.175702	2.29392	0.176191	4.0791	0.000971
MPro	70	75	AGNVQL			5	601.33	Mpro	5	603.994	0.129945	2.4298	0.130605	4.07925	0.002038
MPro	70	75	AGNVQL			5	601.33	Mpro	30	604.258	0.101825	2.69457	0.102667	4.07446	0.001816
MPro	70	75	AGNVQL			5	601.33	Mpro	120	604.248	0.071046	2.68383	0.072248	4.07575	0.000693
MPro	70	75	AGNVQL			5	601.33	Mpro+PPACK	0	601.564	0.013122	0	0	4.08506	0.004631
MPro	70	75	AGNVQL			5	601.33	Mpro+PPACK	0.25	603.333	0.031726	1.76894	0.034333	4.07375	0.000534
MPro	70	75	AGNVQL			5	601.33	Mpro+PPACK	1	603.81	0.014684	2.24603	0.019693	4.07286	0.002123
MPro	70	75	AGNVQL			5	601.33	Mpro+PPACK	5	603.955	0.064664	2.39116	0.065982	4.07086	0.001796
MPro	70	75	AGNVQL			5	601.33	Mpro+PPACK	30	604.361	0.049523	2.79734	0.051232	4.06928	0.002076
MPro	70	75	AGNVQL			5	601.33	Mpro+PPACK	120	604.423	0.203601	2.85902	0.204024	4.07172	0.002238
MPro	76	87	RVIGHSMQNCVL			11	1356.69	Mpro	0	1357.51	0.055	0	0	4.33649	0.005384
MPro	76	87	RVIGHSMQNCVL			11	1356.69	Mpro	0.25	1359.14	0.096266	1.63193	0.110869	4.33397	0.00399
MPro	76	87	RVIGHSMQNCVL			11	1356.69	Mpro	1	1359.26	0.089968	1.74735	0.105447	4.32969	0.002133
MPro	76	87	RVIGHSMQNCVL			11	1356.69	Mpro	5	1359.16	0.045246	1.65043	0.071219	4.32942	0.00226
MPro	76	87	RVIGHSMQNCVL			11	1356.69	Mpro	30	1359.25	0.108436	1.74293	0.121586	4.32661	0.001864
MPro	76	87	RVIGHSMQNCVL			11	1356.69	Mpro	120	1359.58	0.10377	2.06731	0.117444	4.32653	0.002402
MPro	76	87	RVIGHSMQNCVL			11	1356.69	Mpro+PPACK	0	1357.51	0.055	0	0	4.33649	0.005384
MPro	76	87	RVIGHSMQNCVL			11	1356.69	Mpro+PPACK	0.25	1358.94	0.169972	1.43297	0.178649	4.33215	0.001308
MPro	76	87	RVIGHSMQNCVL			11	1356.69	Mpro+PPACK	1	1359.03	0.219584	1.51618	0.226367	4.33438	0.002759
MPro	76	87	RVIGHSMQNCVL			11	1356.69	Mpro+PPACK	5	1358.9	0.361058	1.39404	0.365223	4.33186	0.002205
MPro	76	87	RVIGHSMQNCVL			11	1356.69	Mpro+PPACK	30	1359.04	0.095428	1.53022	0.110143	4.33179	0.00358
MPro	76	87	RVIGHSMQNCVL			11	1356.69	Mpro+PPACK	120	1359.35	0.184236	1.8385	0.192271	4.33091	0.003066
MPro	88	103	KLKVDTANPKTPKYKF			13	1878.08	Mpro	0	1879.14	0.054832	0	0	3.42488	0.005137
MPro	88	103	KLKVDTANPKTPKYKF			13	1878.08	Mpro	0.25	1881.65	0.046127	2.50729	0.071654	3.42455	0.004663
MPro	88	103	KLKVDTANPKTPKYKF			13	1878.08	Mpro	1	1882	0.040207	2.86106	0.067994	3.42268	0.002644
MPro	88	103	KLKVDTANPKTPKYKF			13	1878.08	Mpro	5	1882.29	0.035979	3.14679	0.065583	3.43227	0.003567
MPro	88	103	KLKVDTANPKTPKYKF			13	1878.08	Mpro	30	1883.08	0.094279	3.93575	0.109064	3.43456	0.000471
MPro	88	103	KLKVDTANPKTPKYKF			13	1878.08	Mpro	120	1883.46	0.163133	4.32208	0.172101	3.44388	0.003417
MPro	88	103	KLKVDTANPKTPKYKF			13	1878.08	Mpro+PPACK	0	1879.14	0.054832	0	0	3.42488	0.005137
MPro	88	103	KLKVDTANPKTPKYKF			13	1878.08	Mpro+PPACK	0.25	1881.71	0.103219	2.57264	0.116879	3.40346	0.002444
MPro	88	103	KLKVDTANPKTPKYKF			13	1878.08	Mpro+PPACK	1	1882.21	0.195711	3.07205	0.203247	3.40625	0.005434
MPro	88	103	KLKVDTANPKTPKYKF			13	1878.08	Mpro+PPACK	5	1882.26	0.434776	3.12398	0.43822	3.41628	0.004277
MPro	88	103	KLKVDTANPKTPKYKF			13	1878.08	Mpro+PPACK	30	1882.72	0.028044	3.58303	0.061588	3.42135	0.006031
MPro	88	103	KLKVDTANPKTPKYKF			13	1878.08	Mpro+PPACK	120	1882.66	2.27374e-13	3.52201	0.054832	3.44539	0
MPro	90	103	KVDTANPKTPKYKF			11	1636.91	Mpro	0	1637.78	0.017098	0	0	3.36896	0.006886
MPro	90	103	KVDTANPKTPKYKF			11	1636.91	Mpro	0.25	1640.78	0.016859	3.00521	0.024012	3.36871	0.00445
MPro	90	103	KVDTANPKTPKYKF			11	1636.91	Mpro	1	1641.16	0.021081	3.38256	0.027143	3.36426	0.002189
MPro	90	103	KVDTANPKTPKYKF			11	1636.91	Mpro	5	1641.49	0.063811	3.71076	0.066062	3.3651	0.002848
MPro	90	103	KVDTANPKTPKYKF			11	1636.91	Mpro	30	1642.3	0.037317	4.51785	0.041048	3.36267	0.001681
MPro	90	103	KVDTANPKTPKYKF			11	1636.91	Mpro	120	1642.47	0.222497	4.68948	0.223153	3.36874	0.003949
MPro	90	103	KVDTANPKTPKYKF			11	1636.91	Mpro+PPACK	0	1637.78	0.017098	0	0	3.36896	0.006886
MPro	90	103	KVDTANPKTPKYKF			11	1636.91	Mpro+PPACK	0.25	1640.91	0.330367	3.13112	0.33081	3.33253	0.00117
MPro	90	103	KVDTANPKTPKYKF			11	1636.91	Mpro+PPACK	1	1641.49	0.320495	3.70614	0.320951	3.33382	0.006058
MPro	90	103	KVDTANPKTPKYKF			11	1636.91	Mpro+PPACK	5	1641.59	0.181066	3.80582	0.181871	3.33919	0.004453
MPro	90	103	KVDTANPKTPKYKF			11	1636.91	Mpro+PPACK	30	1642.19	0.090838	4.41204	0.092433	3.34888	0.004923
MPro	90	103	KVDTANPKTPKYKF			11	1636.91	Mpro+PPACK	120	1642.44	0.22894	4.66313	0.229578	3.35276	0.002619
MPro	104	111	VRIQPGQT			6	898.51	Mpro	0	898.93	0.030631	0	0	3.02556	0.002226
MPro	104	111	VRIQPGQT			6	898.51	Mpro	0.25	899.407	0.044013	0.476999	0.053623	3.02703	0.004549
MPro	104	111	VRIQPGQT			6	898.51	Mpro	1	899.433	0.033612	0.502359	0.045476	3.02061	0.008175
MPro	104	111	VRIQPGQT			6	898.51	Mpro	5	899.434	0.02487	0.503407	0.039457	3.01957	0.002001
MPro	104	111	VRIQPGQT			6	898.51	Mpro	30	899.86	0.056828	0.929335	0.064558	3.00571	0.015104
MPro	104	111	VRIQPGQT			6	898.51	Mpro	120	900.515	0.077651	1.58414	0.083475	3.01929	0.005136
MPro	104	111	VRIQPGQT			6	898.51	Mpro+PPACK	0	898.93	0.030631	0	0	3.02556	0.002226
MPro	104	111	VRIQPGQT			6	898.51	Mpro+PPACK	0.25	900.597	0.064268	1.66684	0.071194	3.00461	0.002387
MPro	104	111	VRIQPGQT			6	898.51	Mpro+PPACK	1	900.904	0.213318	1.97333	0.215506	2.98544	0.008614
MPro	104	111	VRIQPGQT			6	898.51	Mpro+PPACK	5	901.052	0.143743	2.1213	0.146971	2.99391	0.003716
MPro	104	111	VRIQPGQT			6	898.51	Mpro+PPACK	30	901.483	0.155652	2.55273	0.158638	2.98899	0.005522
MPro	104	111	VRIQPGQT			6	898.51	Mpro+PPACK	120	901.724	0.114537	2.7937	0.118562	2.96876	0.009363
MPro	104	112	VRIQPGQTF			7	1045.58	Mpro	0	1046.08	0.017613	0	0	4.23459	0.004057
MPro	104	112	VRIQPGQTF			7	1045.58	Mpro	0.25	1046.45	0.036631	0.36237	0.040646	4.23508	0.003888
MPro	104	112	VRIQPGQTF			7	1045.58	Mpro	1	1046.47	0.055245	0.389345	0.057985	4.23202	0.00121
MPro	104	112	VRIQPGQTF			7	1045.58	Mpro	5	1046.48	0.055135	0.3931	0.05788	4.22967	0.00163
MPro	104	112	VRIQPGQTF			7	1045.58	Mpro	30	1046.85	0.085221	0.765948	0.087022	4.22689	0.000273
MPro	104	112	VRIQPGQTF			7	1045.58	Mpro	120	1047.32	0.152169	1.23284	0.153185	4.22645	0.000812
MPro	104	112	VRIQPGQTF			7	1045.58	Mpro+PPACK	0	1046.08	0.017613	0	0	4.23459	0.004057
MPro	104	112	VRIQPGQTF			7	1045.58	Mpro+PPACK	0.25	1047.41	0.052539	1.32783	0.055413	4.23148	0.000568
MPro	104	112	VRIQPGQTF			7	1045.58	Mpro+PPACK	1	1047.55	0.134548	1.46947	0.135696	4.23189	0.001586
MPro	104	112	VRIQPGQTF			7	1045.58	Mpro+PPACK	5	1047.64	0.15588	1.56074	0.156872	4.22948	0.001917
MPro	104	112	VRIQPGQTF			7	1045.58	Mpro+PPACK	30	1047.91	0.371654	1.82927	0.372071	4.2276	0.002651
MPro	104	112	VRIQPGQTF			7	1045.58	Mpro+PPACK	120	1048.07	0.429636	1.98373	0.429997	4.22643	0.002626
MPro	112	115	FSVL			3	465.271	Mpro	0	465.48	0.005306	0	0	5.50795	0.002677
MPro	112	115	FSVL			3	465.271	Mpro	0.25	465.505	0.010357	0.025797	0.011637	5.51225	0.004567
MPro	112	115	FSVL			3	465.271	Mpro	1	465.51	0.004033	0.030639	0.006665	5.50525	0.002027
MPro	112	115	FSVL			3	465.271	Mpro	5	465.493	0.002637	0.013819	0.005925	5.5043	0.000629
MPro	112	115	FSVL			3	465.271	Mpro	30	465.501	0.00184	0.021155	0.005616	5.49886	0.001916
MPro	112	115	FSVL			3	465.271	Mpro	120	465.502	0.01118	0.022796	0.012375	5.50127	0.000924
MPro	112	115	FSVL			3	465.271	Mpro+PPACK	0	465.48	0.005306	0	0	5.50795	0.002677
MPro	112	115	FSVL			3	465.271	Mpro+PPACK	0.25	465.538	0.009486	0.058153	0.010869	5.5102	0.002321
MPro	112	115	FSVL			3	465.271	Mpro+PPACK	1	465.531	0.031382	0.051711	0.031828	5.50812	0.001366
MPro	112	115	FSVL			3	465.271	Mpro+PPACK	5	465.54	0.011	0.060309	0.012212	5.50631	0.002573
MPro	112	115	FSVL			3	465.271	Mpro+PPACK	30	465.602	0.018022	0.122492	0.018787	5.50535	0.003156
MPro	112	115	FSVL			3	465.271	Mpro+PPACK	120	465.764	0.00299	0.284267	0.00609	5.50512	0.004352
MPro	128	134	CAMRPNF			5	838.37	Mpro	0	838.961	0.091463	0	0	4.2817	0.004704
MPro	128	134	CAMRPNF			5	838.37	Mpro	0.25	839.232	0.047711	0.271646	0.103159	4.27822	0.004292
MPro	128	134	CAMRPNF			5	838.37	Mpro	1	839.348	0.02686	0.386958	0.095325	4.27538	0.002321
MPro	128	134	CAMRPNF			5	838.37	Mpro	5	839.525	0.031901	0.564029	0.096866	4.27299	0.001765
MPro	128	134	CAMRPNF			5	838.37	Mpro	30	839.869	0.045872	0.908191	0.102321	4.26989	0.000532
MPro	128	134	CAMRPNF			5	838.37	Mpro	120	839.964	0.04547	1.0029	0.102142	4.2705	0.000887
MPro	128	134	CAMRPNF			5	838.37	Mpro+PPACK	0	838.961	0.091463	0	0	4.2817	0.004704
MPro	128	134	CAMRPNF			5	838.37	Mpro+PPACK	0.25	839.751	0.182649	0.789881	0.20427	4.27589	0.001441
MPro	128	134	CAMRPNF			5	838.37	Mpro+PPACK	1	839.75	0.198671	0.789541	0.218713	4.27605	0.001145
MPro	128	134	CAMRPNF			5	838.37	Mpro+PPACK	5	839.944	0.059189	0.983499	0.108944	4.2737	0.001729
MPro	128	134	CAMRPNF			5	838.37	Mpro+PPACK	30	840.251	0.069097	1.29007	0.114629	4.27225	0.002401
MPro	128	134	CAMRPNF			5	838.37	Mpro+PPACK	120	840.532	0.074077	1.57157	0.117698	4.27074	0.002232
MPro	129	134	AMRPNF			4	735.361	Mpro	0	735.749	0.007519	0	0	4.08036	0.005996
MPro	129	134	AMRPNF			4	735.361	Mpro	0.25	735.938	0.018135	0.188431	0.019632	4.07895	0.005035
MPro	129	134	AMRPNF			4	735.361	Mpro	1	736.014	0.011481	0.264344	0.013724	4.07606	0.001354
MPro	129	134	AMRPNF			4	735.361	Mpro	5	736.26	0.089477	0.510383	0.089792	4.07373	0.002376
MPro	129	134	AMRPNF			4	735.361	Mpro	30	736.532	0.0316	0.783084	0.032482	4.07144	0.000762
MPro	129	134	AMRPNF			4	735.361	Mpro	120	736.554	0.026707	0.805252	0.027745	4.07274	0.001841
MPro	129	134	AMRPNF			4	735.361	Mpro+PPACK	0	735.749	0.007519	0	0	4.08036	0.005996
MPro	129	134	AMRPNF			4	735.361	Mpro+PPACK	0.25	736.394	0.044855	0.645078	0.045481	4.07652	0.000248
MPro	129	134	AMRPNF			4	735.361	Mpro+PPACK	1	736.483	0.089257	0.734016	0.089573	4.07687	0.001246
MPro	129	134	AMRPNF			4	735.361	Mpro+PPACK	5	736.388	0.131493	0.638581	0.131708	4.07495	0.002683
MPro	129	134	AMRPNF			4	735.361	Mpro+PPACK	30	736.453	0.077038	0.703358	0.077404	4.07442	0.002744
MPro	129	134	AMRPNF			4	735.361	Mpro+PPACK	120	736.592	0.109615	0.84326	0.109873	4.07151	0.001461
MPro	130	134	MRPNF			3	664.323	Mpro	0	664.751	0.037853	0	0	3.96838	0.006112
MPro	130	134	MRPNF			3	664.323	Mpro	0.25	664.889	0.06097	0.138529	0.071765	3.9666	0.005057
MPro	130	134	MRPNF			3	664.323	Mpro	1	665.025	0.004079	0.274596	0.038073	3.96183	0.00191
MPro	130	134	MRPNF			3	664.323	Mpro	5	665.196	0.027438	0.445846	0.046752	3.96086	0.001792
MPro	130	134	MRPNF			3	664.323	Mpro	30	665.449	0.007785	0.698173	0.038646	3.95417	0.002526
MPro	130	134	MRPNF			3	664.323	Mpro	120	665.351	0.099353	0.600288	0.106319	3.9551	0.001839
MPro	130	134	MRPNF			3	664.323	Mpro+PPACK	0	664.692	0.042209	0	0	3.96807	0.006612
MPro	130	134	MRPNF			3	664.323	Mpro+PPACK	0.25	665.235	0.052488	0.543565	0.067355	3.93643	0.001809
MPro	130	134	MRPNF			3	664.323	Mpro+PPACK	1	665.291	0.040442	0.599417	0.058456	3.93896	0.001819
MPro	130	134	MRPNF			3	664.323	Mpro+PPACK	5	665.317	0.053256	0.625522	0.067954	3.93521	0.002076
MPro	130	134	MRPNF			3	664.323	Mpro+PPACK	30	665.289	0.0337	0.596762	0.054012	3.93489	0.002876
MPro	130	134	MRPNF			3	664.323	Mpro+PPACK	120	665.329	0.039021	0.637233	0.057483	3.93454	0.003523
MPro	135	140	TIKGSF			5	652.366	Mpro	0	652.659	0.042747	0	0	3.74445	0.006179
MPro	135	140	TIKGSF			5	652.366	Mpro	0.25	654.17	0.049165	1.51137	0.06515	3.74251	0.0053
MPro	135	140	TIKGSF			5	652.366	Mpro	1	654.695	0.030615	2.03664	0.052579	3.73806	0.003726
MPro	135	140	TIKGSF			5	652.366	Mpro	5	654.776	0.053116	2.11742	0.068181	3.73707	0.00171
MPro	135	140	TIKGSF			5	652.366	Mpro	30	655.193	0.024023	2.5341	0.049034	3.73149	0.002012
MPro	135	140	TIKGSF			5	652.366	Mpro	120	655.294	0.096745	2.63501	0.105768	3.73216	0.001574
MPro	135	140	TIKGSF			5	652.366	Mpro+PPACK	0	652.659	0.042747	0	0	3.74445	0.006179
MPro	135	140	TIKGSF			5	652.366	Mpro+PPACK	0.25	654.965	0.111123	2.30629	0.119062	3.68496	0.00572
MPro	135	140	TIKGSF			5	652.366	Mpro+PPACK	1	655.296	0	2.6372	0.042747	3.67419	0
MPro	135	140	TIKGSF			5	652.366	Mpro+PPACK	5	655.3	0	2.6415	0.042747	3.67242	0
MPro	135	140	TIKGSF			5	652.366	Mpro+PPACK	30	655.262	0.023509	2.60362	0.048785	3.68135	0.003784
MPro	135	140	TIKGSF			5	652.366	Mpro+PPACK	120	655.249	0.021636	2.59043	0.04791	3.69687	0.003191
MPro	135	141	TIKGSFL			6	765.451	Mpro	0	765.811	0.012038	0	0	4.85168	0.003775
MPro	135	141	TIKGSFL			6	765.451	Mpro	0.25	767.535	0.063193	1.72437	0.064329	4.85231	0.004881
MPro	135	141	TIKGSFL			6	765.451	Mpro	1	768.331	0.015335	2.5197	0.019496	4.84703	0.00046
MPro	135	141	TIKGSFL			6	765.451	Mpro	5	768.596	0.032443	2.785	0.034605	4.84623	0.001339
MPro	135	141	TIKGSFL			6	765.451	Mpro	30	768.961	0.062162	3.1495	0.063317	4.84292	0.001423
MPro	135	141	TIKGSFL			6	765.451	Mpro	120	768.957	0.111668	3.14562	0.112316	4.84335	0.000767
MPro	135	141	TIKGSFL			6	765.451	Mpro+PPACK	0	765.811	0.012038	0	0	4.85168	0.003775
MPro	135	141	TIKGSFL			6	765.451	Mpro+PPACK	0.25	768.454	0.045779	2.64259	0.047335	4.85203	0.00123
MPro	135	141	TIKGSFL			6	765.451	Mpro+PPACK	1	768.851	0.089991	3.03968	0.090793	4.85223	0.002238
MPro	135	141	TIKGSFL			6	765.451	Mpro+PPACK	5	768.688	0.186289	2.8767	0.186677	4.84814	0.001373
MPro	135	141	TIKGSFL			6	765.451	Mpro+PPACK	30	768.573	0.177139	2.76179	0.177548	4.84817	0.002562
MPro	135	141	TIKGSFL			6	765.451	Mpro+PPACK	120	768.557	0.117724	2.74639	0.118338	4.84673	0.003146
MPro	151	154	NIDY			3	524.235	Mpro	0	524.448	0.036736	0	0	4.1048	0.006785
MPro	151	154	NIDY			3	524.235	Mpro	0.25	525.393	0.065432	0.944925	0.07504	4.10077	0.004528
MPro	151	154	NIDY			3	524.235	Mpro	1	525.398	0.011662	0.949862	0.038543	4.09877	0.00223
MPro	151	154	NIDY			3	524.235	Mpro	5	525.542	0.035832	1.09415	0.051318	4.09745	0.001054
MPro	151	154	NIDY			3	524.235	Mpro	30	525.686	0.007249	1.23814	0.037445	4.09345	0.001059
MPro	151	154	NIDY			3	524.235	Mpro	120	525.687	0.012777	1.23918	0.038895	4.09627	0.000459
MPro	151	154	NIDY			3	524.235	Mpro+PPACK	0	524.448	0.036736	0	0	4.1048	0.006785
MPro	151	154	NIDY			3	524.235	Mpro+PPACK	0.25	525.589	0.008921	1.14109	0.037804	4.09715	0.000401
MPro	151	154	NIDY			3	524.235	Mpro+PPACK	1	525.729	0.007788	1.28096	0.037553	4.09786	0.000895
MPro	151	154	NIDY			3	524.235	Mpro+PPACK	5	525.66	0.016118	1.21182	0.040117	4.09516	0.00306
MPro	151	154	NIDY			3	524.235	Mpro+PPACK	30	525.649	0.044424	1.20114	0.057646	4.09608	0.00461
MPro	151	154	NIDY			3	524.235	Mpro+PPACK	120	525.683	0	1.23512	0.036736	4.09285	0
MPro	151	156	NIDYDC			5	742.271	Mpro	0	742.675	0.01953	0	0	4.30043	0.006812
MPro	151	156	NIDYDC			5	742.271	Mpro	0.25	744.471	0.050409	1.79577	0.05406	4.29739	0.005038
MPro	151	156	NIDYDC			5	742.271	Mpro	1	744.649	0.060815	1.97363	0.063874	4.29504	0.002448
MPro	151	156	NIDYDC			5	742.271	Mpro	5	744.778	0.054014	2.10349	0.057436	4.29389	0.001513
MPro	151	156	NIDYDC			5	742.271	Mpro	30	744.959	0.051969	2.28407	0.055517	4.29011	0.000767
MPro	151	156	NIDYDC			5	742.271	Mpro	120	744.903	0.039596	2.22851	0.04415	4.29098	0.001803
MPro	151	156	NIDYDC			5	742.271	Mpro+PPACK	0	742.675	0.01953	0	0	4.30043	0.006812
MPro	151	156	NIDYDC			5	742.271	Mpro+PPACK	0.25	744.834	0.046364	2.15915	0.05031	4.29504	0.000757
MPro	151	156	NIDYDC			5	742.271	Mpro+PPACK	1	744.869	0.041325	2.19447	0.045707	4.29791	0.001578
MPro	151	156	NIDYDC			5	742.271	Mpro+PPACK	5	744.773	0.222937	2.09766	0.223791	4.29563	0.000681
MPro	151	156	NIDYDC			5	742.271	Mpro+PPACK	30	744.711	0.012648	2.03599	0.023268	4.29182	0.002539
MPro	151	156	NIDYDC			5	742.271	Mpro+PPACK	120	744.746	0.019888	2.07072	0.027874	4.29221	0.003512
MPro	155	159	DCVSF			4	570.223	Mpro	0	570.415	0.011172	0	0	4.84339	0.006772
MPro	155	159	DCVSF			4	570.223	Mpro	0.25	570.48	0.018802	0.065553	0.02187	4.83985	0.005477
MPro	155	159	DCVSF			4	570.223	Mpro	1	570.479	0.009397	0.064462	0.014598	4.83781	0.000532
MPro	155	159	DCVSF			4	570.223	Mpro	5	570.487	0.003611	0.071649	0.011741	4.83537	0.001992
MPro	155	159	DCVSF			4	570.223	Mpro	30	570.552	0.02675	0.137208	0.028989	4.8316	0.001399
MPro	155	159	DCVSF			4	570.223	Mpro	120	570.614	0.015228	0.199436	0.018886	4.83252	0.001442
MPro	155	159	DCVSF			4	570.223	Mpro+PPACK	0	570.415	0.011172	0	0	4.84339	0.006772
MPro	155	159	DCVSF			4	570.223	Mpro+PPACK	0.25	570.477	0.015753	0.061887	0.019312	4.87546	0.083716
MPro	155	159	DCVSF			4	570.223	Mpro+PPACK	1	570.511	0.015945	0.096423	0.019469	4.83979	0.000789
MPro	155	159	DCVSF			4	570.223	Mpro+PPACK	5	570.485	0.009399	0.069666	0.0146	4.83726	0.000795
MPro	155	159	DCVSF			4	570.223	Mpro+PPACK	30	570.565	0.032267	0.149698	0.034146	4.83808	0.003078
MPro	155	159	DCVSF			4	570.223	Mpro+PPACK	120	570.602	0.013574	0.187333	0.01758	4.83688	0.001865
MPro	160	176	CYMHHMELPTGVHAGTD			15	1898.8	Mpro	0	1900.06	0.012905	0	0	4.17141	0.007343
MPro	160	176	CYMHHMELPTGVHAGTD			15	1898.8	Mpro	0.25	1901.96	0.008162	1.89927	0.015269	4.16664	0.004907
MPro	160	176	CYMHHMELPTGVHAGTD			15	1898.8	Mpro	1	1902.23	0.071668	2.16278	0.072821	4.16236	0.001669
MPro	160	176	CYMHHMELPTGVHAGTD			15	1898.8	Mpro	5	1902.23	0.029929	2.16843	0.032593	4.15995	0.001881
MPro	160	176	CYMHHMELPTGVHAGTD			15	1898.8	Mpro	30	1902.78	0.055404	2.71715	0.056887	4.15708	0.00059
MPro	160	176	CYMHHMELPTGVHAGTD			15	1898.8	Mpro	120	1903.32	0.03257	3.25334	0.035033	4.16019	0.000766
MPro	160	176	CYMHHMELPTGVHAGTD			15	1898.8	Mpro+PPACK	0	1900.06	0.012905	0	0	4.17141	0.007343
MPro	160	176	CYMHHMELPTGVHAGTD			15	1898.8	Mpro+PPACK	0.25	1901.94	0.046357	1.88025	0.048119	4.16416	0.000837
MPro	160	176	CYMHHMELPTGVHAGTD			15	1898.8	Mpro+PPACK	1	1902.29	0.109998	2.22741	0.110753	4.16547	0.001963
MPro	160	176	CYMHHMELPTGVHAGTD			15	1898.8	Mpro+PPACK	5	1902.18	0.137425	2.1167	0.138029	4.16263	0.001444
MPro	160	176	CYMHHMELPTGVHAGTD			15	1898.8	Mpro+PPACK	30	1902.5	0.324325	2.43913	0.324582	4.16317	0.003625
MPro	160	176	CYMHHMELPTGVHAGTD			15	1898.8	Mpro+PPACK	120	1903.2	0.061932	3.13669	0.063263	4.16068	0.001954
MPro	160	177	CYMHHMELPTGVHAGTDL			16	2011.88	Mpro	0	2013.16	0.057338	0	0	4.57729	0.008872
MPro	160	177	CYMHHMELPTGVHAGTDL			16	2011.88	Mpro	0.25	2014.6	0.33645	1.43816	0.341301	4.57304	0.005614
MPro	160	177	CYMHHMELPTGVHAGTDL			16	2011.88	Mpro	1	2014.86	0.408898	1.69456	0.412898	4.56531	0.002395
MPro	160	177	CYMHHMELPTGVHAGTDL			16	2011.88	Mpro	5	2014.84	0.426681	1.67676	0.430516	4.56745	0.001759
MPro	160	177	CYMHHMELPTGVHAGTDL			16	2011.88	Mpro	30	2015.33	0.508302	2.16895	0.511525	4.56438	0.001551
MPro	160	177	CYMHHMELPTGVHAGTDL			16	2011.88	Mpro	120	2015.96	0.642459	2.79367	0.645013	4.56749	0.001639
MPro	160	177	CYMHHMELPTGVHAGTDL			16	2011.88	Mpro+PPACK	0	2013.16	0.057338	0	0	4.57729	0.008872
MPro	160	177	CYMHHMELPTGVHAGTDL			16	2011.88	Mpro+PPACK	0.25	2014.71	0.460847	1.54687	0.4644	4.57209	0.004716
MPro	160	177	CYMHHMELPTGVHAGTDL			16	2011.88	Mpro+PPACK	1	2014.88	0.497766	1.71898	0.501057	4.57615	0.008889
MPro	160	177	CYMHHMELPTGVHAGTDL			16	2011.88	Mpro+PPACK	5	2014.82	0.502797	1.65747	0.506055	4.57371	0.008371
MPro	160	177	CYMHHMELPTGVHAGTDL			16	2011.88	Mpro+PPACK	30	2015.3	0.568716	2.14192	0.571599	4.57693	0.010655
MPro	160	177	CYMHHMELPTGVHAGTDL			16	2011.88	Mpro+PPACK	120	2015.88	0.705443	2.72138	0.707769	4.57451	0.011616
MPro	161	176	YMHHMELPTGVHAGTD			14	1795.79	Mpro	0	1796.87	0.129709	0	0	3.99512	0.004743
MPro	161	176	YMHHMELPTGVHAGTD			14	1795.79	Mpro	0.25	1798.55	0.10732	1.67821	0.168351	3.99437	0.004632
MPro	161	176	YMHHMELPTGVHAGTD			14	1795.79	Mpro	1	1798.89	0.114277	2.02283	0.172869	3.98998	0.002716
MPro	161	176	YMHHMELPTGVHAGTD			14	1795.79	Mpro	5	1798.93	0.166224	2.06459	0.210843	3.99139	0.003873
MPro	161	176	YMHHMELPTGVHAGTD			14	1795.79	Mpro	30	1799.36	0.101756	2.49676	0.164859	3.98775	0.003729
MPro	161	176	YMHHMELPTGVHAGTD			14	1795.79	Mpro	120	1799.87	0.199009	3.00216	0.237548	3.98738	0.003593
MPro	161	176	YMHHMELPTGVHAGTD			14	1795.79	Mpro+PPACK	0	1796.87	0.129709	0	0	3.99512	0.004743
MPro	161	176	YMHHMELPTGVHAGTD			14	1795.79	Mpro+PPACK	0.25	1798.58	0.191216	1.71558	0.231058	3.99323	0.003831
MPro	161	176	YMHHMELPTGVHAGTD			14	1795.79	Mpro+PPACK	1	1798.94	0.204244	2.06845	0.241951	3.99645	0.004027
MPro	161	176	YMHHMELPTGVHAGTD			14	1795.79	Mpro+PPACK	5	1798.92	0.456329	2.04981	0.474405	3.99396	0.005095
MPro	161	176	YMHHMELPTGVHAGTD			14	1795.79	Mpro+PPACK	30	1799.31	0.176857	2.44416	0.219324	3.99553	0.005323
MPro	161	176	YMHHMELPTGVHAGTD			14	1795.79	Mpro+PPACK	120	1799.77	0.195466	2.89779	0.234587	3.99499	0.00353
MPro	161	177	YMHHMELPTGVHAGTDL			15	1908.87	Mpro	0	1909.95	0.105224	0	0	4.44605	0.003368
MPro	161	177	YMHHMELPTGVHAGTDL			15	1908.87	Mpro	0.25	1911.59	0.334055	1.64796	0.350235	4.44628	0.00443
MPro	161	177	YMHHMELPTGVHAGTDL			15	1908.87	Mpro	1	1911.78	0.403099	1.83582	0.416606	4.4424	0.002485
MPro	161	177	YMHHMELPTGVHAGTDL			15	1908.87	Mpro	5	1911.86	0.473454	1.91589	0.485006	4.44303	0.00294
MPro	161	177	YMHHMELPTGVHAGTDL			15	1908.87	Mpro	30	1912.3	0.539732	2.35242	0.549894	4.44178	0.00203
MPro	161	177	YMHHMELPTGVHAGTDL			15	1908.87	Mpro	120	1913.04	0.653403	3.09664	0.661821	4.44386	0.004074
MPro	161	177	YMHHMELPTGVHAGTDL			15	1908.87	Mpro+PPACK	0	1909.95	0.105224	0	0	4.44605	0.003368
MPro	161	177	YMHHMELPTGVHAGTDL			15	1908.87	Mpro+PPACK	0.25	1911.59	0.484077	1.64379	0.495381	4.44228	0.001358
MPro	161	177	YMHHMELPTGVHAGTDL			15	1908.87	Mpro+PPACK	1	1911.84	0.467216	1.89366	0.478918	4.44691	0.00319
MPro	161	177	YMHHMELPTGVHAGTDL			15	1908.87	Mpro+PPACK	5	1911.8	0.534911	1.84859	0.545162	4.44731	0.002803
MPro	161	177	YMHHMELPTGVHAGTDL			15	1908.87	Mpro+PPACK	30	1912.31	0.581058	2.35994	0.590508	4.44614	0.003545
MPro	161	177	YMHHMELPTGVHAGTDL			15	1908.87	Mpro+PPACK	120	1913.01	0.905226	3.06277	0.911321	4.44652	0.003846
MPro	177	181	LEGNF			4	579.277	Mpro	0	579.531	0.012143	0	0	4.40808	0.00613
MPro	177	181	LEGNF			4	579.277	Mpro	0.25	580.385	0.007745	0.854405	0.014403	4.40703	0.003916
MPro	177	181	LEGNF			4	579.277	Mpro	1	580.374	0.01052	0.842743	0.016066	4.40319	0.001638
MPro	177	181	LEGNF			4	579.277	Mpro	5	580.299	0.007542	0.768	0.014294	4.40223	0.001619
MPro	177	181	LEGNF			4	579.277	Mpro	30	580.294	0.015396	0.762629	0.019608	4.39989	0.000507
MPro	177	181	LEGNF			4	579.277	Mpro	120	580.299	0.016787	0.768143	0.020718	4.40152	0.0021
MPro	177	181	LEGNF			4	579.277	Mpro+PPACK	0	579.531	0.012143	0	0	4.40808	0.00613
MPro	177	181	LEGNF			4	579.277	Mpro+PPACK	0.25	580.372	0.017578	0.840767	0.021364	4.403	0.000551
MPro	177	181	LEGNF			4	579.277	Mpro+PPACK	1	580.386	0.073854	0.854455	0.074846	4.4033	0.001187
MPro	177	181	LEGNF			4	579.277	Mpro+PPACK	5	580.26	0.083662	0.728446	0.084539	4.40135	0.000335
MPro	177	181	LEGNF			4	579.277	Mpro+PPACK	30	580.251	0.049107	0.719646	0.050586	4.4011	0.003067
MPro	177	181	LEGNF			4	579.277	Mpro+PPACK	120	580.239	0.044527	0.707683	0.046153	4.3997	0.001242
MPro	200	205	ITVNVL			5	658.413	Mpro	0	658.734	0.049026	0	0	5.23475	0.001002
MPro	200	205	ITVNVL			5	658.413	Mpro	0.25	658.835	0.020118	0.100349	0.052993	5.23999	0.005036
MPro	200	205	ITVNVL			5	658.413	Mpro	1	658.913	0.005039	0.178798	0.049284	5.2342	0.002823
MPro	200	205	ITVNVL			5	658.413	Mpro	5	659.272	0.045402	0.538168	0.06682	5.23358	0.001451
MPro	200	205	ITVNVL			5	658.413	Mpro	30	659.613	0.003158	0.879101	0.049128	5.23118	0.000891
MPro	200	205	ITVNVL			5	658.413	Mpro	120	659.629	0.00303	0.894529	0.04912	5.23203	0.001568
MPro	200	205	ITVNVL			5	658.413	Mpro+PPACK	0	658.714	0.058283	0	0	5.23429	0.001146
MPro	200	205	ITVNVL			5	658.413	Mpro+PPACK	0.25	658.883	0.022811	0.168369	0.062587	5.23661	0.000504
MPro	200	205	ITVNVL			5	658.413	Mpro+PPACK	1	658.984	0.076362	0.269735	0.096062	5.23826	0.002386
MPro	200	205	ITVNVL			5	658.413	Mpro+PPACK	5	659.321	0.021317	0.607028	0.062058	5.23625	0.002055
MPro	200	205	ITVNVL			5	658.413	Mpro+PPACK	30	659.464	0.029799	0.750113	0.065459	5.23388	0.004717
MPro	200	205	ITVNVL			5	658.413	Mpro+PPACK	120	659.46	0.022978	0.746049	0.062649	5.23649	0.002586
MPro	209	218	YAAVINGDRW			9	1164.58	Mpro	0	1165.15	0.029951	0	0	4.96206	0.005081
MPro	209	218	YAAVINGDRW			9	1164.58	Mpro	0.25	1167.09	0.01932	1.93662	0.035642	4.96078	0.004382
MPro	209	218	YAAVINGDRW			9	1164.58	Mpro	1	1167.27	0.02322	2.12118	0.037898	4.95688	0.001254
MPro	209	218	YAAVINGDRW			9	1164.58	Mpro	5	1167.45	0.054134	2.29641	0.061867	4.95637	0.002772
MPro	209	218	YAAVINGDRW			9	1164.58	Mpro	30	1167.57	0.016932	2.42466	0.034406	4.95292	0.000802
MPro	209	218	YAAVINGDRW			9	1164.58	Mpro	120	1167.71	0.065525	2.56222	0.072046	4.95304	0.001471
MPro	209	218	YAAVINGDRW			9	1164.58	Mpro+PPACK	0	1165.15	0.029951	0	0	4.96206	0.005081
MPro	209	218	YAAVINGDRW			9	1164.58	Mpro+PPACK	0.25	1167.22	0.061119	2.07097	0.068063	4.96101	0.001203
MPro	209	218	YAAVINGDRW			9	1164.58	Mpro+PPACK	1	1167.52	0.200832	2.37287	0.203053	4.96131	0.001014
MPro	209	218	YAAVINGDRW			9	1164.58	Mpro+PPACK	5	1167.45	0.136795	2.29852	0.140035	4.95819	0.001937
MPro	209	218	YAAVINGDRW			9	1164.58	Mpro+PPACK	30	1167.7	0.081022	2.5483	0.086381	4.95642	0.001726
MPro	209	218	YAAVINGDRW			9	1164.58	Mpro+PPACK	120	1167.87	0.088823	2.719	0.093737	4.95585	0.004258
MPro	211	218	AVINGDRW			7	930.479	Mpro	0	930.948	0.025724	0	0	4.6058	0.003983
MPro	211	218	AVINGDRW			7	930.479	Mpro	0.25	932.684	0.034573	1.73568	0.043093	4.60548	0.003317
MPro	211	218	AVINGDRW			7	930.479	Mpro	1	932.94	0.038209	1.99137	0.046062	4.60051	0.001279
MPro	211	218	AVINGDRW			7	930.479	Mpro	5	933.073	0.065352	2.12444	0.070233	4.60212	0.003067
MPro	211	218	AVINGDRW			7	930.479	Mpro	30	933.268	0.077609	2.31919	0.081761	4.59547	0.001366
MPro	211	218	AVINGDRW			7	930.479	Mpro	120	933.469	0.058633	2.52065	0.064028	4.59709	0.000102
MPro	211	218	AVINGDRW			7	930.479	Mpro+PPACK	0	930.948	0.025724	0	0	4.6058	0.003983
MPro	211	218	AVINGDRW			7	930.479	Mpro+PPACK	0.25	932.922	0.039853	1.97361	0.047434	4.60654	0.001267
MPro	211	218	AVINGDRW			7	930.479	Mpro+PPACK	1	933.196	0.171367	2.24741	0.173287	4.60875	0.002261
MPro	211	218	AVINGDRW			7	930.479	Mpro+PPACK	5	933.249	0.11318	2.30052	0.116067	4.60667	0.000913
MPro	211	218	AVINGDRW			7	930.479	Mpro+PPACK	30	933.444	0.059205	2.49544	0.064552	4.60548	0.001847
MPro	211	218	AVINGDRW			7	930.479	Mpro+PPACK	120	933.549	0.06954	2.60058	0.074146	4.60418	0.004013
MPro	219	227	FLNRFTTTL			8	1112.61	Mpro	0	1113.21	0.017903	0	0	5.29643	0.002428
MPro	219	227	FLNRFTTTL			8	1112.61	Mpro	0.25	1117.4	0.065405	4.19621	0.067811	5.29921	0.004435
MPro	219	227	FLNRFTTTL			8	1112.61	Mpro	1	1117.91	0.09673	4.70154	0.098373	5.29064	0.00121
MPro	219	227	FLNRFTTTL			8	1112.61	Mpro	5	1117.67	0.087611	4.45955	0.089421	5.28904	0.001829
MPro	219	227	FLNRFTTTL			8	1112.61	Mpro	30	1117.62	0.10994	4.4132	0.111388	5.28762	0.001829
MPro	219	227	FLNRFTTTL			8	1112.61	Mpro	120	1117.51	0.14142	4.30421	0.142549	5.28559	0.001371
MPro	219	227	FLNRFTTTL			8	1112.61	Mpro+PPACK	0	1113.21	0.017903	0	0	5.29643	0.002428
MPro	219	227	FLNRFTTTL			8	1112.61	Mpro+PPACK	0.25	1117.44	0.167717	4.23668	0.16867	5.29612	0.001816
MPro	219	227	FLNRFTTTL			8	1112.61	Mpro+PPACK	1	1117.92	0.116376	4.712	0.117746	5.29394	0.004445
MPro	219	227	FLNRFTTTL			8	1112.61	Mpro+PPACK	5	1117.62	0.022978	4.41275	0.02913	5.29134	0.000879
MPro	219	227	FLNRFTTTL			8	1112.61	Mpro+PPACK	30	1117.6	0.309366	4.39813	0.309884	5.29245	0.005703
MPro	219	227	FLNRFTTTL			8	1112.61	Mpro+PPACK	120	1117.48	0.055797	4.27628	0.058599	5.29196	0.003705
MPro	228	232	NDFNL			4	622.283	Mpro	0	622.526	0.032484	0	0	5.23749	0.004678
MPro	228	232	NDFNL			4	622.283	Mpro	0.25	622.661	0.005806	0.134931	0.032999	5.23789	0.005671
MPro	228	232	NDFNL			4	622.283	Mpro	1	622.681	0.01072	0.154449	0.034207	5.23363	0.002202
MPro	228	232	NDFNL			4	622.283	Mpro	5	622.978	0.0226	0.451947	0.039572	5.23363	0.002223
MPro	228	232	NDFNL			4	622.283	Mpro	30	623.822	0.022652	1.29564	0.039602	5.23052	0.000482
MPro	228	232	NDFNL			4	622.283	Mpro	120	624.473	0.027979	1.94729	0.042872	5.23232	0.00241
MPro	228	232	NDFNL			4	622.283	Mpro+PPACK	0	622.526	0.032484	0	0	5.23749	0.004678
MPro	228	232	NDFNL			4	622.283	Mpro+PPACK	0.25	622.684	0.021195	0.157849	0.038787	5.23508	0.001604
MPro	228	232	NDFNL			4	622.283	Mpro+PPACK	1	622.766	0.02263	0.240002	0.039589	5.23897	0.003374
MPro	228	232	NDFNL			4	622.283	Mpro+PPACK	5	622.955	0.007279	0.429233	0.03329	5.23608	0.000223
MPro	228	232	NDFNL			4	622.283	Mpro+PPACK	30	623.842	0.041874	1.31551	0.052996	5.23465	0.004435
MPro	228	232	NDFNL			4	622.283	Mpro+PPACK	120	624.482	0.026421	1.95595	0.041872	5.23518	0.001932
MPro	230	234	FNLVA			4	563.319	Mpro	0	563.539	0.015406	0	0	5.18403	0.001199
MPro	230	234	FNLVA			4	563.319	Mpro	0.25	563.573	0.006217	0.033646	0.016614	5.18743	0.003978
MPro	230	234	FNLVA			4	563.319	Mpro	1	563.688	0.021363	0.148846	0.026339	5.18082	0.002311
MPro	230	234	FNLVA			4	563.319	Mpro	5	563.727	0.06033	0.187248	0.062266	5.18198	0.002133
MPro	230	234	FNLVA			4	563.319	Mpro	30	564.203	0.045226	0.663996	0.047778	5.17851	0.00056
MPro	230	234	FNLVA			4	563.319	Mpro	120	564.748	0.116228	1.20843	0.117245	5.17715	0.001662
MPro	230	234	FNLVA			4	563.319	Mpro+PPACK	0	563.539	0.015406	0	0	5.18403	0.001199
MPro	230	234	FNLVA			4	563.319	Mpro+PPACK	0.25	563.589	0.011535	0.049927	0.019246	5.18349	0.000624
MPro	230	234	FNLVA			4	563.319	Mpro+PPACK	1	563.626	0.025317	0.086354	0.029636	5.18497	0.000802
MPro	230	234	FNLVA			4	563.319	Mpro+PPACK	5	563.667	0.014074	0.127578	0.020867	5.18146	0.002494
MPro	230	234	FNLVA			4	563.319	Mpro+PPACK	30	564.194	0.012186	0.65475	0.019643	5.18033	0.00466
MPro	230	234	FNLVA			4	563.319	Mpro+PPACK	120	564.621	0.101939	1.08135	0.103097	5.17941	0.002544
MPro	233	245	VAMKYNYEPLTQD			11	1571.74	Mpro	0	1572.67	0.000695	0	0	4.6085	0.002999
MPro	233	245	VAMKYNYEPLTQD			11	1571.74	Mpro	0.25	1574.99	0.015982	2.32081	0.015997	4.60808	0.00422
MPro	233	245	VAMKYNYEPLTQD			11	1571.74	Mpro	1	1575.51	0.013697	2.84665	0.013715	4.6029	0.001113
MPro	233	245	VAMKYNYEPLTQD			11	1571.74	Mpro	5	1575.88	0.051276	3.21092	0.051281	4.60387	0.003307
MPro	233	245	VAMKYNYEPLTQD			11	1571.74	Mpro	30	1576.26	0.043932	3.58886	0.043938	4.59916	0.001611
MPro	233	245	VAMKYNYEPLTQD			11	1571.74	Mpro	120	1576.72	0.088269	4.05751	0.088271	4.59873	0.001408
MPro	233	245	VAMKYNYEPLTQD			11	1571.74	Mpro+PPACK	0	1572.67	0.000695	0	0	4.6085	0.002999
MPro	233	245	VAMKYNYEPLTQD			11	1571.74	Mpro+PPACK	0.25	1574.97	0.051235	2.30604	0.051239	4.60774	0.000955
MPro	233	245	VAMKYNYEPLTQD			11	1571.74	Mpro+PPACK	1	1575.5	0.129695	2.83685	0.129697	4.61031	0.001569
MPro	233	245	VAMKYNYEPLTQD			11	1571.74	Mpro+PPACK	5	1575.71	0.229557	3.03897	0.229558	4.6063	0.002534
MPro	233	245	VAMKYNYEPLTQD			11	1571.74	Mpro+PPACK	30	1576.13	0.080741	3.45907	0.080744	4.60548	0.002216
MPro	233	245	VAMKYNYEPLTQD			11	1571.74	Mpro+PPACK	120	1576.66	0.176407	3.99126	0.176408	4.60527	0.001607
MPro	235	245	MKYNYEPLTQD			9	1401.64	Mpro	0	1402.44	0.059082	0	0	4.50044	0.003275
MPro	235	245	MKYNYEPLTQD			9	1401.64	Mpro	0.25	1404.21	0.292602	1.76934	0.298508	4.49953	0.003479
MPro	235	245	MKYNYEPLTQD			9	1401.64	Mpro	1	1404.31	0.167963	1.86672	0.178051	4.49557	0.001798
MPro	235	245	MKYNYEPLTQD			9	1401.64	Mpro	5	1404.16	0.202408	1.71381	0.210854	4.4945	0.002144
MPro	235	245	MKYNYEPLTQD			9	1401.64	Mpro	30	1404.5	0.264796	2.05854	0.271308	4.49113	0.00067
MPro	235	245	MKYNYEPLTQD			9	1401.64	Mpro	120	1404.9	0.306079	2.45575	0.311729	4.49037	0.002989
MPro	235	245	MKYNYEPLTQD			9	1401.64	Mpro+PPACK	0	1402.44	0.059082	0	0	4.50044	0.003275
MPro	235	245	MKYNYEPLTQD			9	1401.64	Mpro+PPACK	0.25	1404.25	0.02239	1.80259	0.063182	4.49338	0.000339
MPro	235	245	MKYNYEPLTQD			9	1401.64	Mpro+PPACK	1	1404.25	0.239505	1.80835	0.246685	4.49165	0.001252
MPro	235	245	MKYNYEPLTQD			9	1401.64	Mpro+PPACK	5	1404.25	0.193492	1.80707	0.202311	4.48984	0.001092
MPro	235	245	MKYNYEPLTQD			9	1401.64	Mpro+PPACK	30	1404.5	0.235652	2.05756	0.242946	4.48858	0.003336
MPro	235	245	MKYNYEPLTQD			9	1401.64	Mpro+PPACK	120	1404.81	0.078767	2.36519	0.098462	4.48653	0.002515
MPro	238	245	NYEPLTQD			6	979.437	Mpro	0	979.955	0.039483	0	0	4.21224	0.005027
MPro	238	245	NYEPLTQD			6	979.437	Mpro	0.25	980.592	0.015762	0.636999	0.042512	4.21044	0.004672
MPro	238	245	NYEPLTQD			6	979.437	Mpro	1	980.578	0.029784	0.62356	0.049456	4.20563	0.003466
MPro	238	245	NYEPLTQD			6	979.437	Mpro	5	980.595	0.014384	0.640086	0.042021	4.20507	0.003305
MPro	238	245	NYEPLTQD			6	979.437	Mpro	30	980.666	0.018965	0.711292	0.043801	4.20203	0.001522
MPro	238	245	NYEPLTQD			6	979.437	Mpro	120	980.864	0.025411	0.909553	0.046953	4.20201	0.001707
MPro	238	245	NYEPLTQD			6	979.437	Mpro+PPACK	0	979.955	0.039483	0	0	4.21224	0.005027
MPro	238	245	NYEPLTQD			6	979.437	Mpro+PPACK	0.25	980.632	0.013509	0.677726	0.04173	4.20569	0.001896
MPro	238	245	NYEPLTQD			6	979.437	Mpro+PPACK	1	980.44	0.113703	0.485443	0.120363	4.20667	0.001358
MPro	238	245	NYEPLTQD			6	979.437	Mpro+PPACK	5	980.492	0.10983	0.537494	0.116711	4.20254	0.00101
MPro	238	245	NYEPLTQD			6	979.437	Mpro+PPACK	30	980.518	0.095492	0.563964	0.103333	4.20244	0.003464
MPro	238	245	NYEPLTQD			6	979.437	Mpro+PPACK	120	980.67	0.125804	0.715538	0.131854	4.19749	0.000704
MPro	246	258	HVDILGPLSAQTG			11	1307.7	Mpro	0	1308.35	0.028987	0	0	5.13916	0.002784
MPro	246	258	HVDILGPLSAQTG			11	1307.7	Mpro	0.25	1309.14	0.023473	0.792635	0.0373	5.15013	0.00602
MPro	246	258	HVDILGPLSAQTG			11	1307.7	Mpro	1	1309.7	0.044845	1.34913	0.053398	5.14808	0.00505
MPro	246	258	HVDILGPLSAQTG			11	1307.7	Mpro	5	1310.8	0.187006	2.45281	0.18924	5.14621	0.0047
MPro	246	258	HVDILGPLSAQTG			11	1307.7	Mpro	30	1313.38	0.06057	5.02778	0.067149	5.12667	0.002873
MPro	246	258	HVDILGPLSAQTG			11	1307.7	Mpro	120	1313.63	0.0614	5.28219	0.067899	5.12644	0.002924
MPro	246	258	HVDILGPLSAQTG			11	1307.7	Mpro+PPACK	0	1308.35	0.028987	0	0	5.13916	0.002784
MPro	246	258	HVDILGPLSAQTG			11	1307.7	Mpro+PPACK	0.25	1309.25	0.050902	0.898399	0.058577	5.14869	0.002732
MPro	246	258	HVDILGPLSAQTG			11	1307.7	Mpro+PPACK	1	1309.83	0.0386	1.48269	0.048273	5.15287	0.003178
MPro	246	258	HVDILGPLSAQTG			11	1307.7	Mpro+PPACK	5	1310.74	0.202522	2.38708	0.204586	5.15138	0.003068
MPro	246	258	HVDILGPLSAQTG			11	1307.7	Mpro+PPACK	30	1313.11	0.233478	4.76093	0.235271	5.13443	0.003435
MPro	246	258	HVDILGPLSAQTG			11	1307.7	Mpro+PPACK	120	1313.24	0.020678	4.88517	0.035607	5.13858	0.003761
MPro	246	260	HVDILGPLSAQTGIA			13	1491.82	Mpro	0	1492.61	0.088258	0	0	5.50515	0.003891
MPro	246	260	HVDILGPLSAQTGIA			13	1491.82	Mpro	0.25	1494.02	0.119115	1.41461	0.148249	5.51067	0.003539
MPro	246	260	HVDILGPLSAQTGIA			13	1491.82	Mpro	1	1494.81	0.227934	2.20645	0.244425	5.5005	0.003946
MPro	246	260	HVDILGPLSAQTGIA			13	1491.82	Mpro	5	1496.12	0.243749	3.50695	0.259236	5.49762	0.00136
MPro	246	260	HVDILGPLSAQTGIA			13	1491.82	Mpro	30	1498.2	0.258559	5.59167	0.273207	5.48948	0.002519
MPro	246	260	HVDILGPLSAQTGIA			13	1491.82	Mpro	120	1498.61	0.152292	6.00161	0.176018	5.48915	0.002506
MPro	246	260	HVDILGPLSAQTGIA			13	1491.82	Mpro+PPACK	0	1492.61	0.088258	0	0	5.50515	0.003891
MPro	246	260	HVDILGPLSAQTGIA			13	1491.82	Mpro+PPACK	0.25	1494.08	0.12964	1.47164	0.156831	5.50811	0.003986
MPro	246	260	HVDILGPLSAQTGIA			13	1491.82	Mpro+PPACK	1	1494.89	0.238985	2.28631	0.254761	5.50464	0.002451
MPro	246	260	HVDILGPLSAQTGIA			13	1491.82	Mpro+PPACK	5	1496.32	0.181354	3.71091	0.20169	5.50047	0.003075
MPro	246	260	HVDILGPLSAQTGIA			13	1491.82	Mpro+PPACK	30	1498.3	0.107255	5.68972	0.1389	5.49653	0.003754
MPro	246	260	HVDILGPLSAQTGIA			13	1491.82	Mpro+PPACK	120	1498.91	0.037479	6.30508	0.095886	5.49783	0.005972
MPro	246	262	HVDILGPLSAQTGIAVL			15	1703.97	Mpro	0	1704.89	0.00588	0	0	6.20568	0.006201
MPro	246	262	HVDILGPLSAQTGIAVL			15	1703.97	Mpro	0.25	1707.75	0.070961	2.86041	0.071204	6.21274	0.005187
MPro	246	262	HVDILGPLSAQTGIAVL			15	1703.97	Mpro	1	1708.83	0.027832	3.93459	0.028446	6.19962	0.001336
MPro	246	262	HVDILGPLSAQTGIAVL			15	1703.97	Mpro	5	1709.99	0.034437	5.10064	0.034935	6.19683	0.00276
MPro	246	262	HVDILGPLSAQTGIAVL			15	1703.97	Mpro	30	1711.94	0.034597	7.04408	0.035093	6.18952	0.001078
MPro	246	262	HVDILGPLSAQTGIAVL			15	1703.97	Mpro	120	1712.29	0.136111	7.39996	0.136238	6.19049	0.005002
MPro	246	262	HVDILGPLSAQTGIAVL			15	1703.97	Mpro+PPACK	0	1704.89	0.00588	0	0	6.20568	0.006201
MPro	246	262	HVDILGPLSAQTGIAVL			15	1703.97	Mpro+PPACK	0.25	1707.87	0.049209	2.97849	0.049559	6.20404	0.002023
MPro	246	262	HVDILGPLSAQTGIAVL			15	1703.97	Mpro+PPACK	1	1708.91	0.127978	4.01274	0.128113	6.20246	0.003553
MPro	246	262	HVDILGPLSAQTGIAVL			15	1703.97	Mpro+PPACK	5	1710.01	0.210672	5.11946	0.210754	6.20146	0.006836
MPro	246	262	HVDILGPLSAQTGIAVL			15	1703.97	Mpro+PPACK	30	1711.79	0.335076	6.89727	0.335127	6.19454	0.005843
MPro	246	262	HVDILGPLSAQTGIAVL			15	1703.97	Mpro+PPACK	120	1712.42	0.197458	7.52578	0.197546	6.1974	0.005532
MPro	269	278	KELLQNGMNG			9	1103.55	Mpro	0	1104.13	0.010745	0	0	3.88512	0.005016
MPro	269	278	KELLQNGMNG			9	1103.55	Mpro	0.25	1106.65	0.073164	2.51947	0.073949	3.88356	0.004799
MPro	269	278	KELLQNGMNG			9	1103.55	Mpro	1	1107.2	0.0223	3.07097	0.024753	3.87911	0.002734
MPro	269	278	KELLQNGMNG			9	1103.55	Mpro	5	1107.32	0.033478	3.18711	0.03516	3.8792	0.00381
MPro	269	278	KELLQNGMNG			9	1103.55	Mpro	30	1107.84	0.21803	3.70694	0.218295	3.87432	0.002379
MPro	269	278	KELLQNGMNG			9	1103.55	Mpro	120	1107.77	0.247706	3.63267	0.247939	3.87331	0.001062
MPro	269	278	KELLQNGMNG			9	1103.55	Mpro+PPACK	0	1104.13	0.010745	0	0	3.88512	0.005016
MPro	269	278	KELLQNGMNG			9	1103.55	Mpro+PPACK	0.25	1106.59	0.037688	2.45657	0.03919	3.84661	0.002792
MPro	269	278	KELLQNGMNG			9	1103.55	Mpro+PPACK	1	1107.13	0.158992	3.0023	0.159355	3.85125	0.00264
MPro	269	278	KELLQNGMNG			9	1103.55	Mpro+PPACK	5	1107.19	0.167492	3.05962	0.167836	3.8494	0.002288
MPro	269	278	KELLQNGMNG			9	1103.55	Mpro+PPACK	30	1107.56	0.175776	3.42428	0.176105	3.84368	0.001517
MPro	269	278	KELLQNGMNG			9	1103.55	Mpro+PPACK	120	1107.59	0.047659	3.45511	0.048855	3.84397	0.003481
MPro	269	282	KELLQNGMNGRTIL			13	1586.87	Mpro	0	1587.8	0.023222	0	0	4.69705	0.00263
MPro	269	282	KELLQNGMNGRTIL			13	1586.87	Mpro	0.25	1590.9	0.009362	3.09827	0.025038	4.69423	0.004657
MPro	269	282	KELLQNGMNGRTIL			13	1586.87	Mpro	1	1592.09	0.023654	4.29494	0.033148	4.68994	0.001879
MPro	269	282	KELLQNGMNGRTIL			13	1586.87	Mpro	5	1593.29	0.019993	5.48674	0.030643	4.68857	0.002365
MPro	269	282	KELLQNGMNGRTIL			13	1586.87	Mpro	30	1593.9	0.027664	6.09847	0.036119	4.68456	0.000215
MPro	269	282	KELLQNGMNGRTIL			13	1586.87	Mpro	120	1593.97	0.193576	6.17475	0.194964	4.68477	0.000473
MPro	269	282	KELLQNGMNGRTIL			13	1586.87	Mpro+PPACK	0	1587.8	0.023222	0	0	4.69705	0.00263
MPro	269	282	KELLQNGMNGRTIL			13	1586.87	Mpro+PPACK	0.25	1590.94	0.065741	3.13746	0.069722	4.69513	0.002485
MPro	269	282	KELLQNGMNGRTIL			13	1586.87	Mpro+PPACK	1	1592.19	0.260453	4.39178	0.261486	4.69426	0.002443
MPro	269	282	KELLQNGMNGRTIL			13	1586.87	Mpro+PPACK	5	1593.11	0.220277	5.30617	0.221498	4.69111	0.002817
MPro	269	282	KELLQNGMNGRTIL			13	1586.87	Mpro+PPACK	30	1593.68	0.137083	5.88034	0.139036	4.68935	0.001839
MPro	269	282	KELLQNGMNGRTIL			13	1586.87	Mpro+PPACK	120	1594.05	0.400988	6.2488	0.40166	4.68753	0.003179
MPro	287	295	LEDEFTPFD			7	1112.48	Mpro	0	1113.07	0.022123	0	0	5.95662	0.002465
MPro	287	295	LEDEFTPFD			7	1112.48	Mpro	0.25	1113.77	0.045477	0.699446	0.050572	5.96382	0.006884
MPro	287	295	LEDEFTPFD			7	1112.48	Mpro	1	1113.86	0.022699	0.78535	0.031697	5.95334	0.002557
MPro	287	295	LEDEFTPFD			7	1112.48	Mpro	5	1113.81	0.01267	0.742521	0.025495	5.95126	0.00086
MPro	287	295	LEDEFTPFD			7	1112.48	Mpro	30	1113.96	0.012501	0.89279	0.025411	5.94763	0.002178
MPro	287	295	LEDEFTPFD			7	1112.48	Mpro	120	1114.18	0.032061	1.10754	0.038953	5.94943	0.005115
MPro	287	295	LEDEFTPFD			7	1112.48	Mpro+PPACK	0	1113.07	0.022123	0	0	5.95662	0.002465
MPro	287	295	LEDEFTPFD			7	1112.48	Mpro+PPACK	0.25	1113.87	0.048105	0.801742	0.052948	5.9578	0.002409
MPro	287	295	LEDEFTPFD			7	1112.48	Mpro+PPACK	1	1114.1	0.096274	1.03163	0.098784	5.95156	0.001216
MPro	287	295	LEDEFTPFD			7	1112.48	Mpro+PPACK	5	1114.21	0.008913	1.13686	0.023851	5.95663	0.001333
MPro	287	295	LEDEFTPFD			7	1112.48	Mpro+PPACK	30	1114.42	0.055413	1.34753	0.059666	5.95133	0.002554
MPro	287	295	LEDEFTPFD			7	1112.48	Mpro+PPACK	120	1114.59	0.131728	1.51876	0.133573	5.95118	0.006966
MPro	291	295	FTPFD			3	626.282	Mpro	0	626.587	0.010896	0	0	5.21657	0.004548
MPro	291	295	FTPFD			3	626.282	Mpro	0.25	627.417	0.003249	0.829662	0.01137	5.21683	0.005024
MPro	291	295	FTPFD			3	626.282	Mpro	1	627.482	0.022159	0.894549	0.024693	5.21326	0.002237
MPro	291	295	FTPFD			3	626.282	Mpro	5	627.423	0.019435	0.835854	0.022281	5.21321	0.000922
MPro	291	295	FTPFD			3	626.282	Mpro	30	627.489	0.007093	0.901263	0.013002	5.21013	0.000212
MPro	291	295	FTPFD			3	626.282	Mpro	120	627.683	0.047418	1.09527	0.048654	5.20996	0.003563
MPro	291	295	FTPFD			3	626.282	Mpro+PPACK	0	626.587	0.010896	0	0	5.21657	0.004548
MPro	291	295	FTPFD			3	626.282	Mpro+PPACK	0.25	627.574	0.039954	0.986941	0.041413	5.21391	0.000713
MPro	291	295	FTPFD			3	626.282	Mpro+PPACK	1	627.691	0.05159	1.10353	0.052728	5.21662	0.00297
MPro	291	295	FTPFD			3	626.282	Mpro+PPACK	5	627.755	0.079371	1.16743	0.080115	5.21333	0.001618
MPro	291	295	FTPFD			3	626.282	Mpro+PPACK	30	627.751	0.041109	1.16366	0.042529	5.21368	0.003258
MPro	291	295	FTPFD			3	626.282	Mpro+PPACK	120	627.745	0.026903	1.15758	0.029025	5.21386	0.001745

## Sheet: relative_uptake_difference
				15sec					1min					5min					30min					2hr
Sequence	Start	End	Modification	Relative Uptake	Relative Uptake SD	Num Exchangers	Rel Fract Uptake	Rel Fract Uptake SD	Relative Uptake	Relative Uptake SD	Num Exchangers	Rel Fract Uptake	Rel Fract Uptake SD	Relative Uptake	Relative Uptake SD	Num Exchangers	Rel Fract Uptake	Rel Fract Uptake SD	Relative Uptake	Relative Uptake SD	Num Exchangers	Rel Fract Uptake	Rel Fract Uptake SD	Relative Uptake	Relative Uptake SD	Num Exchangers	Rel Fract Uptake	Rel Fract Uptake SD
SGFRKMAFPSGKVEGCM	1	17		4.22935	0.616718	15	28.1957	4.11145	4.10812	0.725349	15	27.3875	4.83566	3.19421	0.915196	15	21.2947	6.1013	2.58136	0.801916	15	17.2091	5.34611	1.48943	0.963337	15	9.92951	6.42225
RKMAFPSGKVEGCM	4	17		4.10191	0.317948	12	34.1825	2.64957	4.69085	0.259382	12	39.0904	2.16152	4.24577	0.411566	12	35.3815	3.42971	3.61597	0.060491	12	30.1331	0.50409	2.5124	0.256843	12	20.9366	2.14036
VQVTCGTTTL	18	27		0.012072	0.062771	9	0.134137	0.697452	-0.066029	0.100451	9	-0.73365	1.11612	-0.094738	0.110841	9	-1.05264	1.23157	-0.100636	0.100963	9	-1.11818	1.12181	-0.143439	0.061237	9	-1.59377	0.680416
NGLW	28	31		0.02501	0.044639	3	0.833662	1.48796	-0.032502	0.056232	3	-1.08341	1.87441	0.026012	0.044052	3	0.86707	1.46839	0.023838	0.042689	3	0.794588	1.42295	0.022482	0.047982	3	0.749391	1.59939
WLDD	31	34		0.0079	0.019808	3	0.263325	0.660258	0.037754	0.010167	3	1.25846	0.33891	0.037083	0.011771	3	1.23609	0.392377	0.002091	0.011921	3	0.069692	0.397378	0.022795	0.027376	3	0.759835	0.912528
VVYCPRHVIC	35	44		-0.023077	0.079424	8	-0.288462	0.992799	-0.068365	0.082001	8	-0.854562	1.02501	-0.209862	0.073355	8	-2.62327	0.916941	-0.498612	0.08751	8	-6.23265	1.09388	-0.737763	0.079918	8	-9.22204	0.998977
VVYCPRHVICT	35	45		-0.22775	0.138266	9	-2.53056	1.53628	-0.218418	0.189018	9	-2.42687	2.1002	-0.394304	0.174559	9	-4.38116	1.93955	-0.738325	0.192933	9	-8.20362	2.1437	-0.998697	0.16565	9	-11.0966	1.84056
VYCPRHVIC	36	44		-0.214252	0.111333	7	-3.06074	1.59047	-0.293834	0.207561	7	-4.19763	2.96515	-0.520077	0.220944	7	-7.42967	3.15635	-0.811688	0.143566	7	-11.5955	2.05094	-0.976611	0.098979	7	-13.9516	1.41398
YCPRHVIC	37	44		-0.098151	0.216085	6	-1.63586	3.60141	-0.147695	0.224757	6	-2.46159	3.74595	-0.331562	0.272012	6	-5.52603	4.53353	-0.625706	0.303958	6	-10.4284	5.06597	-0.739581	0.355669	6	-12.3263	5.92781
CPRHVIC	38	44		-0.310138	0.143075	5	-6.20277	2.8615	-0.265884	0.136303	5	-5.31767	2.72606	-0.325147	0.149645	5	-6.50295	2.99289	-0.45815	0.143052	5	-9.163	2.86105	-0.694152	0.200561	5	-13.883	4.01121
DMLNPNYEDL	48	57		-0.182102	0.121963	8	-2.27628	1.52454	-0.103781	0.092521	8	-1.29726	1.15652	-0.300335	0.109264	8	-3.75419	1.3658	-0.417704	0.10467	8	-5.2213	1.30838	-0.278005	0.189304	8	-3.47507	2.36631
MLNPNYEDL	49	57		0.037687	0.13715	7	0.53838	1.95928	-0.030475	0.254975	7	-0.435364	3.6425	-0.132194	0.261575	7	-1.88848	3.73678	-0.319655	0.272439	7	-4.5665	3.89198	-0.34828	0.297469	7	-4.97543	4.24956
IRKSNHNFL	59	67		-0.157826	0.158908	8	-1.97283	1.98635	-0.170894	0.119454	8	-2.13617	1.49318	0.010709	0.240835	8	0.133865	3.01044	-0.188767	0.171867	8	-2.35959	2.14834	-0.108272	0.269943	8	-1.3534	3.37428
VQAGNVQL	68	75		0.228415	0.103487	7	3.26307	1.47839	0.309954	0.102254	7	4.42792	1.46077	-0.143528	0.090155	7	-2.0504	1.28793	-0.158738	0.085006	7	-2.26769	1.21437	-0.150475	0.058398	7	-2.14965	0.834251
AGNVQL	70	75		-0.014493	0.084302	5	-0.289866	1.68604	-0.047885	0.177289	5	-0.95769	3.54577	-0.03864	0.146326	5	-0.772809	2.92653	0.102773	0.11474	5	2.05545	2.29479	0.175185	0.216438	5	3.50369	4.32876
RVIGHSMQNCVL	76	87		-0.198958	0.210255	11	-1.80871	1.91141	-0.23117	0.249722	11	-2.10154	2.2702	-0.256392	0.372103	11	-2.33084	3.38275	-0.212719	0.164057	11	-1.93381	1.49143	-0.228808	0.225302	11	-2.08007	2.0482
KLKVDTANPKTPKYKF	88	103		0.065348	0.137095	13	0.502676	1.05458	0.210987	0.214319	13	1.62297	1.6486	-0.022801	0.443101	13	-0.175392	3.40847	-0.352721	0.125252	13	-2.71324	0.963478	-0.800079	0.180625	13	-6.15445	1.38943
KVDTANPKTPKYKF	90	103		0.125912	0.33168	11	1.14465	3.01527	0.323583	0.322096	11	2.94167	2.92815	0.095059	0.193498	11	0.864174	1.75907	-0.105807	0.101138	11	-0.961881	0.919432	-0.026352	0.320161	11	-0.239568	2.91056
VRIQPGQT	104	111		1.18984	0.089129	6	19.8306	1.48549	1.47097	0.220252	6	24.5162	3.67087	1.61789	0.152175	6	26.9649	2.53625	1.62339	0.171271	6	27.0566	2.85451	1.20956	0.145	6	20.1593	2.41667
VRIQPGQTF	104	112		0.965462	0.068722	7	13.7923	0.981736	1.08013	0.147566	7	15.4304	2.10809	1.16764	0.167209	7	16.6806	2.3887	1.06333	0.382113	7	15.1904	5.45875	0.750886	0.456468	7	10.7269	6.52097
FSVL	112	115		0.032356	0.015923	3	1.07854	0.530768	0.021073	0.032518	3	0.702423	1.08393	0.04649	0.013574	3	1.54967	0.452463	0.101338	0.019608	3	3.37792	0.653599	0.261471	0.013793	3	8.71571	0.459762
CAMRPNF	128	134		0.518235	0.22884	5	10.3647	4.57681	0.402583	0.238584	5	8.05166	4.77169	0.41947	0.14578	5	8.3894	2.9156	0.381881	0.153654	5	7.63762	3.07308	0.568664	0.155839	5	11.3733	3.11678
AMRPNF	129	134		0.456647	0.049537	4	11.4162	1.23843	0.469672	0.090618	4	11.7418	2.26546	0.128198	0.159404	4	3.20494	3.9851	-0.079726	0.083943	4	-1.99314	2.09858	0.038008	0.113321	4	0.950206	2.83304
MRPNF	130	134		0.405036	0.098422	3	13.5012	3.28072	0.324821	0.069762	3	10.8274	2.32538	0.179675	0.082483	3	5.98918	2.74945	-0.101411	0.066414	3	-3.38038	2.2138	0.036945	0.120864	3	1.2315	4.02879
TIKGSF	135	140		0.794923	0.135721	5	15.8985	2.71442	0.600566	0.067763	5	12.0113	1.35526	0.524084	0.080473	5	10.4817	1.60946	0.069522	0.069169	5	1.39043	1.38338	-0.044578	0.116113	5	-0.891555	2.32226
TIKGSFL	135	141		0.918222	0.079868	6	15.3037	1.33113	0.519985	0.092863	6	8.66642	1.54771	0.091698	0.189858	6	1.5283	3.16429	-0.387711	0.1885	6	-6.46186	3.14167	-0.399232	0.163152	6	-6.65386	2.71921
NIDY	151	154		0.196165	0.084024	3	6.53884	2.80082	0.331102	0.053812	3	11.0367	1.79375	0.117669	0.065137	3	3.9223	2.17125	-0.037001	0.06874	3	-1.23335	2.29133	-0.004063	0.053501	3	-0.135436	1.78338
NIDYDC	151	156		0.363378	0.073848	5	7.26757	1.47696	0.220845	0.078543	5	4.41691	1.57086	-0.005832	0.231044	5	-0.116637	4.62088	-0.24808	0.060196	5	-4.96161	1.20392	-0.157789	0.052213	5	-3.15578	1.04425
DCVSF	155	159		-0.003666	0.029176	4	-0.091658	0.729411	0.031961	0.024334	4	0.799032	0.608362	-0.001983	0.018735	4	-0.049585	0.468375	0.01249	0.044792	4	0.31226	1.1198	-0.012103	0.025802	4	-0.302572	0.645049
CYMHHMELPTGVHAGTD	160	176		-0.019023	0.050484	15	-0.126817	0.33656	0.064624	0.132548	15	0.430827	0.883656	-0.051729	0.141825	15	-0.344862	0.945502	-0.278019	0.329529	15	-1.85346	2.19686	-0.11665	0.072315	15	-0.777669	0.482101
CYMHHMELPTGVHAGTDL	160	177		0.108709	0.576328	16	0.67943	3.60205	0.024425	0.649264	16	0.152653	4.0579	-0.019291	0.664407	16	-0.12057	4.15254	-0.027029	0.767062	16	-0.168932	4.79414	-0.072283	0.95759	16	-0.451772	5.98494
YMHHMELPTGVHAGTD	161	176		0.037373	0.285884	14	0.266954	2.04203	0.045623	0.297361	14	0.325879	2.12401	-0.014781	0.519148	14	-0.105576	3.7082	-0.052605	0.274375	14	-0.375751	1.95982	-0.104367	0.333857	14	-0.745479	2.38469
YMHHMELPTGVHAGTDL	161	177		-0.004164	0.606686	15	-0.027759	4.04457	0.057845	0.634763	15	0.385635	4.23175	-0.067299	0.72968	15	-0.448661	4.86453	0.007527	0.806897	15	0.050182	5.37932	-0.033876	1.12628	15	-0.225838	7.50856
LEGNF	177	181		-0.013638	0.025765	4	-0.340959	0.644137	0.011712	0.076551	4	0.292806	1.91376	-0.039554	0.085739	4	-0.988853	2.14347	-0.042983	0.054254	4	-1.07457	1.35634	-0.06046	0.05059	4	-1.51149	1.26475
ITVNVL	200	205		0.068019	0.082009	5	1.36039	1.64018	0.090937	0.107967	5	1.81875	2.15935	0.06886	0.091193	5	1.3772	1.82386	-0.128988	0.081843	5	-2.57977	1.63687	-0.14848	0.079609	5	-2.96959	1.59218
YAAVINGDRW	209	218		0.134352	0.076831	9	1.4928	0.853674	0.251696	0.206559	9	2.79662	2.2951	0.002112	0.153093	9	0.023468	1.70103	0.123649	0.092981	9	1.37388	1.03312	0.156782	0.118226	9	1.74202	1.31362
AVINGDRW	211	218		0.237926	0.064086	7	3.39894	0.915512	0.256046	0.179304	7	3.6578	2.56149	0.176084	0.135662	7	2.51548	1.93803	0.176258	0.104172	7	2.51797	1.48818	0.079931	0.097965	7	1.14187	1.3995
FLNRFTTTL	219	227		0.040476	0.181791	8	0.505953	2.27239	0.010453	0.153432	8	0.130666	1.9179	-0.046809	0.094046	8	-0.585108	1.17558	-0.015066	0.329295	8	-0.188327	4.11619	-0.027932	0.154124	8	-0.349145	1.92655
NDFNL	228	232		0.022918	0.050925	4	0.572944	1.27313	0.085553	0.05232	4	2.13882	1.30801	-0.022713	0.051712	4	-0.567836	1.2928	0.019871	0.066158	4	0.496765	1.65396	0.00866	0.059927	4	0.216501	1.49819
FNLVA	230	234		0.016281	0.025425	4	0.407018	0.635629	-0.062492	0.039649	4	-1.5623	0.991227	-0.05967	0.06567	4	-1.49175	1.64174	-0.009246	0.051659	4	-0.231147	1.29146	-0.127081	0.156126	4	-3.17703	3.90315
VAMKYNYEPLTQD	233	245		-0.014765	0.053678	11	-0.134227	0.487986	-0.009799	0.13042	11	-0.089078	1.18563	-0.171949	0.235216	11	-1.56317	2.13832	-0.12979	0.091924	11	-1.17991	0.835677	-0.066255	0.197261	11	-0.60232	1.79328
MKYNYEPLTQD	235	245		0.03324	0.305121	9	0.369338	3.39023	-0.058373	0.304229	9	-0.648589	3.38033	0.093261	0.292215	9	1.03624	3.24683	-0.000985	0.364185	9	-0.010944	4.0465	-0.090557	0.32691	9	-1.00619	3.63233
NYEPLTQD	238	245		0.040727	0.059571	6	0.678777	0.992844	-0.138117	0.130127	6	-2.30195	2.16879	-0.102592	0.124046	6	-1.70987	2.06743	-0.147329	0.112233	6	-2.45548	1.87054	-0.194015	0.139965	6	-3.23359	2.33275
HVDILGPLSAQTG	246	258		0.105764	0.069445	11	0.961491	0.631315	0.133558	0.071983	11	1.21416	0.654394	-0.065729	0.278688	11	-0.597537	2.53353	-0.266846	0.244666	11	-2.42587	2.22423	-0.397021	0.076669	11	-3.60928	0.696987
HVDILGPLSAQTGIA	246	260		0.057027	0.21581	13	0.438667	1.66007	0.079867	0.353054	13	0.614359	2.7158	0.203962	0.328454	13	1.56894	2.52657	0.098054	0.306489	13	0.754265	2.35761	0.303462	0.200441	13	2.33432	1.54185
HVDILGPLSAQTGIAVL	246	262		0.118079	0.086753	15	0.787194	0.578356	0.078149	0.131233	15	0.520991	0.87489	0.018829	0.21363	15	0.125526	1.4242	-0.146807	0.33696	15	-0.978713	2.2464	0.125828	0.239969	15	0.838855	1.59979
KELLQNGMNG	269	278		-0.062906	0.083691	9	-0.698953	0.929904	-0.068668	0.161266	9	-0.762973	1.79185	-0.127494	0.171479	9	-1.4166	1.90532	-0.282652	0.280474	9	-3.14057	3.11637	-0.177557	0.252706	9	-1.97285	2.80785
KELLQNGMNGRTIL	269	282		0.039197	0.074081	13	0.301516	0.569857	0.096842	0.263579	13	0.744935	2.02753	-0.18057	0.223607	13	-1.389	1.72006	-0.218127	0.143651	13	-1.6779	1.10501	0.074048	0.446477	13	0.569598	3.43444
LEDEFTPFD	287	295		0.102296	0.073219	7	1.46137	1.04599	0.246282	0.103744	7	3.51832	1.48206	0.394338	0.034912	7	5.63341	0.498743	0.454737	0.064852	7	6.49624	0.926457	0.411218	0.139137	7	5.87454	1.98767
FTPFD	291	295		0.157279	0.042946	3	5.24262	1.43152	0.208984	0.058223	3	6.96612	1.94078	0.331574	0.083156	3	11.0525	2.77186	0.262394	0.044472	3	8.74645	1.4824	0.062312	0.056654	3	2.07707	1.88847
