# Supplementary material for: The Main protease (Mpro) from SARS-CoV-2 triggers plasma clotting in vitro by activating coagulation factors VII and FXII
Source: Research Square preprint supplement (doi:10.21203/rs.3.rs-4959212/v1), 2024-11-13
Supplement: Supplementary file 2 [file 5469cb16e32e079604d362d5.xlsx]

## Sheet: Table legend
Table legend
Mpro_contaminant_trypsin	Contaminant proteins identified from trypsin proteolysis of Mpro. Results are reported as spectra counts for the condition without Mpro (MS.MS.Count_CTRL) and with Mpro (MS.MS.Count_MPro)
Mpro_contaminant_GluC	Contaminant proteins identified from GluC proteolysis of Mpro. Results are reported as spectra counts for the condition without Mpro (MS.MS.Count_CTRL) and with Mpro (MS.MS.Count_MPro)

## Sheet: MPro_contaminant_trypsin
id	Uniprot.ID	Protein.ID	MS.MS.Count_CTRL	MS.MS.Count_MPro
18	O74286|P00924|P07323|P09104|P17183|P30575|P42894|Q27527|Q6BI20|Q6BTB1|Q6FQY4|Q6FTW6|Q70CP7|Q756H2|Q870B9|Q9W7L2	ENO_ASHGO|ENO_CAEEL|ENO_CUNEL|ENO_KLULA|ENO_NEOFR|ENO_RHOMI|ENO1_CANAL|ENO1_CANGA|ENO1_DEBHA|ENO1_YEAST|ENO2_CANGA|ENO2_DEBHA|ENOA_SCEUN|ENOG_HUMAN|ENOG_MOUSE|ENOG_RAT	117	95
5	MPro|P0C6F5|P0C6F8|P0C6T7|P0C6U8|P0C6V9|P0C6W2|P0C6W6|P0C6X7|P0DTC1|P0DTD1	MPro|R1A_BC279|R1A_BCHK3|R1A_BCRP3|R1A_SARS|R1A_SARS2|R1AB_BC279|R1AB_BCHK3|R1AB_BCRP3|R1AB_SARS|R1AB_SARS2	0	40
14	A5A6K9|O02192|O02705|O16076|O16087|O61998|P02828|P04809|P04810|P04811|P06660|P07900|P07901|P11501|P12861|P27323|P27741|P27890|P30946|P33125|P46633|P51819|P82995|Q08277|Q14568|Q18688|Q25293|Q4R4P1|Q58FF6|Q58FF8|Q58FG0|Q58FG1|Q61W58|Q76LV2|Q7PT10|Q90474|Q9GKX7	H90A1_DANRE|H90B2_HUMAN|H90B4_HUMAN|HS901_ARATH|HS902_HUMAN|HS904_HUMAN|HS905_HUMAN|HS90A_BOVIN|HS90A_CHICK|HS90A_CRIGR|HS90A_HORSE|HS90A_HUMAN|HS90A_MACFA|HS90A_MOUSE|HS90A_PANTR|HS90A_PIG|HS90A_RABIT|HS90A_RAT|HSP82_AJECA|HSP82_MAIZE|HSP83_ANOGA|HSP83_DROAV|HSP83_DROME|HSP83_DROMI|HSP83_DROPE|HSP83_DROPS|HSP83_DROSI|HSP83_DROVI|HSP83_IPONI|HSP83_LEIAM|HSP83_LEIDO|HSP83_LEIIN|HSP83_TRYBB|HSP85_T…	16	14
6	A1A766|A1JJD5|A1S8K7|A3QGW2|A4TQF9|A4W6D5|A5F361|A6T4F4|A6VNB1|A7FME3|A7MIK5|A7MWW0|A7ZHA4|A7ZVV7|A8ALU3|A8FYU0|A8G9K8|A8H760|A9MR77|A9MXI2|A9R015|B0TQC2|B0UWR4|B1IRG0|B1JL04|B1KRT2|B2K3M0|B2VGR9|B4F2V5|B4T6D6|B4TIB4|B4TVZ5|B5BLH8|B5F6Y8|B5FA11|B5FHA6|B5R5I2|B5RF08|B5Y242|B8CKF3|B8D758|B8D8V4|C0Q4F3|C3LTA5|C5B7L7|C6DF10|O32464|O34241|O87384|P0A6Y8|P0A6Y9|P0A6Z0|P57870|P71331|Q0I3V2|Q0T8H6|Q0TLX5|…	DNAK_ACTSZ|DNAK_AGGAC|DNAK_ALIFM|DNAK_BAUCH|DNAK_BUCA5|DNAK_BUCAI|DNAK_BUCAT|DNAK_CITK8|DNAK_CROS8|DNAK_ECO24|DNAK_ECO57|DNAK_ECOHS|DNAK_ECOK1|DNAK_ECOL5|DNAK_ECOL6|DNAK_ECOLC|DNAK_ECOLI|DNAK_ECOUT|DNAK_EDWI9|DNAK_ENT38|DNAK_ERWT9|DNAK_HAES1|DNAK_HISS2|DNAK_KLEP3|DNAK_KLEP7|DNAK_MANSM|DNAK_PASMU|DNAK_PECAS|DNAK_PECCP|DNAK_PHOLL|DNAK_PROMH|DNAK_SALA4|DNAK_SALAR|DNAK_SALCH|DNAK_SALDC|DNAK_SALEP|DNA…	0	4
10	A2Q0Z0|A5DPE3|O24534|O42820|O49169|O59949|O64937|P02993|P02994|P05303|P06805|P08736|P0CN30|P0CN31|P0CT31|P0CT32|P0CT53|P0CT54|P0CT55|P0CY35|P0DH99|P10126|P13549|P14864|P14865|P14963|P17506|P17507|P17508|P17786|P19039|P25166|P27592|P27634|P28295|P29520|P29521|P31018|P32186|P34823|P34825|P41745|P41752|P43643|P50256|P50257|P51554|P53013|P54959|P62629|P62630|P62631|P62632|P68103|P68104|P68105|P84315|…	EF1A_ABSGL|EF1A_ADIBE|EF1A_ANIIF|EF1A_APIME|EF1A_ARTSA|EF1A_ASHGO|EF1A_ASPOR|EF1A_AURPU|EF1A_BLAAD|EF1A_BLAHO|EF1A_BOMMO|EF1A_CAEEL|EF1A_CHICK|EF1A_CRYNB|EF1A_CRYNJ|EF1A_DANRE|EF1A_EIMBO|EF1A_ENTHI|EF1A_EUGGR|EF1A_HELAL|EF1A_HELAM|EF1A_HELDI|EF1A_HELGL|EF1A_HELVI|EF1A_HELZE|EF1A_HYDVU|EF1A_HYPJE|EF1A_MAIZE|EF1A_MANES|EF1A_NEUCR|EF1A_ONCVO|EF1A_ORYLA|EF1A_ORYSJ|EF1A_PEA|EF1A_PICGU|EF1A_PODAS|EF1A_…	4	4
22	A3FKF7|B0B879|B7LQ20|I2BA89|O09452|O13507|O14556|O16027|O42259|O43026|O44104|O44105|O57479|O83816|P00355|P00356|P00357|P00358|P00359|P00360|P04406|P04797|P04970|P07486|P07487|P08439|P08477|P09094|P09317|P0A1P0|P0A1P1|P0A9B2|P0A9B3|P0A9B4|P0A9B5|P0C8Z1|P0CE13|P0DJO7|P10096|P10097|P16858|P17244|P17329|P17330|P17331|P17819|P17878|P20287|P22512|P24163|P24164|P24166|P24748|P24750|P24751|P24753|P26518|…	G3P_ASHGO|G3P_ASPOR|G3P_ATLHE|G3P_BACFR|G3P_BLUGH|G3P_BOVIN|G3P_BUCAI|G3P_CANLF|G3P_CAVPO|G3P_CHICK|G3P_CHLMU|G3P_CHLPN|G3P_CHLT2|G3P_CHLTR|G3P_CITFR|G3P_COLLI|G3P_COTJA|G3P_CRIGR|G3P_DANRE|G3P_DROHY|G3P_ECHMU|G3P_ECOL6|G3P_ESCF3|G3P_ESCFE|G3P_FELCA|G3P_GLOMM|G3P_HAEIN|G3P_HOMAM|G3P_HUMAN|G3P_JACOR|G3P_KLEAE|G3P_KLEPN|G3P_MESAU|G3P_MOUSE|G3P_MUSPF|G3P_ONCMY|G3P_PANVR|G3P_PARBA|G3P_PELSI|G3P_PHARH…	3	4
0	CON__P00761|P00761|P06871|P86909	CON__P00761|SCP_CHIOP|TRY1_CANLF|TRYP_PIG	2	3
3	CON__P08779|CON__Q3ZAW8|CON__Q9Z2K1|P08779|Q9Z2K1	CON__P08779|CON__Q3ZAW8|CON__Q9Z2K1|K1C16_HUMAN|K1C16_MOUSE	0	3
7	A0A0H3NM73|A1AG69|A1JIX3|A3MZU3|A4TQU4|A4WEX9|A5F913|A5UAQ6|A5UG34|A6TEI3|A6VR10|A7FMR8|A7MIN6|A7ZS61|A8A4Y0|A8AQ53|A8G911|A9MP39|A9N728|A9R5A9|B0BUD5|B0UTJ5|B1IQV7|B1JLX6|B1LFR6|B1XGX6|B2K2Q9|B2U211|B2VGN7|B3GXC1|B4F2C3|B5BGJ1|B5QZV4|B5REN2|B5XSX9|B5YS54|B6I1N9|B7LH99|B7LR33|B7M072|B7MB85|B7N0U9|B7NDF0|B7NKN3|B7UJ59|B8F492|C0PZ50|C3LSQ2|C4ZSQ5|C5BFC1|C6DKK7|O34275|P05055|P41121|P44584|Q0I2T0|Q0T…	PNP_ACTP2|PNP_ACTP7|PNP_ACTPJ|PNP_ACTSZ|PNP_CITK8|PNP_CROS8|PNP_ECO24|PNP_ECO27|PNP_ECO45|PNP_ECO55|PNP_ECO57|PNP_ECO5E|PNP_ECO7I|PNP_ECO81|PNP_ECO8A|PNP_ECOBW|PNP_ECODH|PNP_ECOHS|PNP_ECOK1|PNP_ECOL5|PNP_ECOL6|PNP_ECOLC|PNP_ECOLI|PNP_ECOLU|PNP_ECOSE|PNP_ECOSM|PNP_ECOUT|PNP_EDWI9|PNP_ENT38|PNP_ERWT9|PNP_ESCF3|PNP_HAEI8|PNP_HAEIE|PNP_HAEIG|PNP_HAEIN|PNP_HAEPS|PNP_HAES1|PNP_HISS2|PNP_KLEP3|PNP_KLEP7…	0	3
19	P00925	ENO2_YEAST	7	3
24	P06733|P17182|P86210|Q4R5L2|Q5R6Y1|Q9XSJ4	ENOA_BOVIN|ENOA_HUMAN|ENOA_MACFA|ENOA_MESAU|ENOA_MOUSE|ENOA_PONAB	1	3
37	P22943	HSP12_YEAST	2	3
45	Q12306	SMT3_YEAST	0	3
1	CON__P02533|CON__Q61782|P02533|P05785	CON__P02533|CON__Q61782|K1C14_BOVIN|K1C14_HUMAN	0	2
2	A5A6M6|CON__P04264|P04104|P04264|Q6EIY9|Q6IMF3	CON__P04264|K2C1_CANLF|K2C1_HUMAN|K2C1_MOUSE|K2C1_PANTR|K2C1_RAT	0	2
8	A1AJ51|A4W5N8|A7ZV12|A8A7N9|A8AMQ6|A8G8S7|A9MFR9|A9N3Z7|B1ITQ5|B1LQG4|B1XDP7|B2TY18|B4TF80|B4TSC6|B5BKF4|B5F2L0|B5FRK2|B5R005|B5R991|B5Z2F2|B6I615|B7LC02|B7LLS5|B7M8Q4|B7MKU8|B7MSV9|B7NG81|B7NTK2|B7UPW3|C0Q6A2|C5A1D5|O66192|O66194|O66196|O66212|P0A1D3|P0A1D4|P0A6F5|P0A6F6|P0A6F7|P0A6F8|P95800|Q0SXD6|Q0T9P8|Q1R3B6|Q31T78|Q328C4|Q3YUJ7|Q57GP7|Q5PL62	CH60_CITK8|CH60_ECO24|CH60_ECO27|CH60_ECO45|CH60_ECO55|CH60_ECO57|CH60_ECO5E|CH60_ECO7I|CH60_ECO81|CH60_ECO8A|CH60_ECOBW|CH60_ECODH|CH60_ECOHS|CH60_ECOL5|CH60_ECOL6|CH60_ECOLC|CH60_ECOLI|CH60_ECOLU|CH60_ECOSE|CH60_ECOSM|CH60_ECOUT|CH60_ENT38|CH60_ESCF3|CH60_KLUIN|CH60_LELAM|CH60_PLUGE|CH60_RAOPL|CH60_SALA4|CH60_SALAR|CH60_SALCH|CH60_SALDC|CH60_SALEP|CH60_SALG2|CH60_SALHS|CH60_SALPA|CH60_SALPB|CH6…	0	2
11	A2Q0Z1|O73885|O97125|P02825|P08106|P08108|P08418|P09446|P11142|P11147|P14659|P17156|P19120|P19378|P34933|P40918|P41827|P47773|P54652|P63017|P63018|P82910|P86204|Q00043|Q05944|Q5NVM9|Q71U34|Q8INI8|Q90473|Q92260|Q96W30|Q9BIR7|Q9BIS2|Q9GSU4|Q9GSU7|Q9TUG3|Q9U639|Q9VG58|Q9W6Y1	HSP1_CAEEL|HSP68_DROME|HSP70_AJECA|HSP70_CHICK|HSP70_DAVTA|HSP70_DROME|HSP70_HYDVU|HSP70_ONCMY|HSP70_PENCI|HSP70_SCHMA|HSP71_DROME|HSP71_DROSI|HSP72_BOVIN|HSP72_CAPHI|HSP72_DROME|HSP72_DROSI|HSP72_HUMAN|HSP72_MESAU|HSP72_MOUSE|HSP72_PARBA|HSP72_RAT|HSP73_DROME|HSP74_ANOAL|HSP74_DROME|HSP75_DROME|HSP7C_BOVIN|HSP7C_CHICK|HSP7C_CRIGR|HSP7C_DANRE|HSP7C_HORSE|HSP7C_HUMAN|HSP7C_ICTPU|HSP7C_MOUSE|HSP7C_…	1	2
15	A7VJC2|O88569|P22626|P51989|P51990|Q2HJ60|Q5RBU8|Q9TTV2	RO21_XENLA|RO22_XENLA|ROA2_BOVIN|ROA2_HUMAN|ROA2_MOUSE|ROA2_PONAB|ROA2_RAT|ROA2_SAGOE	1	2
28	A5A8V7|F5HB71|J9VZ70|O65719|P02827|P09189|P09435|P0CB32|P0DMV8|P0DMV9|P0DMW0|P0DMW1|P10591|P10592|P11143|P11144|P11146|P16627|P17066|P17879|P18694|P22953|P22954|P24629|P26413|P27322|P29357|P29843|P34930|P34931|P36415|P41753|P41797|P41825|P41826|P46587|P48741|P53421|P53623|P55063|P86237|Q01877|Q04967|Q05746|Q24789|Q27965|Q27975|Q28222|Q4R888|Q4U0F3|Q557E0|Q5B2V1|Q5KKP4|Q5R7D3|Q61696|Q6S4N2|Q7YQC6|…	HS701_ARATH|HS702_ARATH|HS704_ARATH|HS71A_BOVIN|HS71A_HUMAN|HS71A_MOUSE|HS71A_PIG|HS71A_RAT|HS71B_BOSMU|HS71B_BOVIN|HS71B_HUMAN|HS71B_MOUSE|HS71B_PIG|HS71B_RAT|HS71L_BOVIN|HS71L_HUMAN|HS71L_MACFA|HS71L_MESAU|HS71L_MOUSE|HS71L_PIG|HS71L_RAT|HS7C1_DICDI|HS7C2_DICDI|HSP70_ACHKL|HSP70_ECHGR|HSP70_EMENI|HSP70_MAIZE|HSP70_ONCTS|HSP70_PLACB|HSP70_PLAFA|HSP70_PLEWA|HSP70_SOYBN|HSP70_XENLA|HSP71_ANOAL|HSP…	3	2
29	O97508|O97680|P10599|P29451|P50413|P82460|Q5R9M3|Q9BDJ3	THIO_BOVIN|THIO_CALJA|THIO_HORSE|THIO_HUMAN|THIO_MACMU|THIO_PIG|THIO_PONAB|THIO_SHEEP	1	2
33	A0A286R7K5|B0FRF9|B1PVZ9|C7E3T4|O15989|O96507|P00565|P00567|P04414|P05122|P05123|P05124|P07335|P12277|P24722|P51541|P51545|Q004B5|Q04447|Q27535|Q29594|Q5EA61	KARG_LIMPO|KARG_METEN|KARG_PENJP|KARG_PENMO|KARG_PENVA|KARG_POLPT|KARG_TRYCR|KARG_TURCO|KARG0_PENVA|KARG2_CAEEL|KCRB_BOVIN|KCRB_CANLF|KCRB_CHICK|KCRB_HUMAN|KCRB_MOUSE|KCRB_PIG|KCRB_RABIT|KCRB_RAT|KCRM_CANLF|KCRM_CHICK|KCRM_TETCF|KCRT_ONCMY	3	2
40	A2XLF2|O16808|O17320|O18499|O18500|O65314|O65315|O65316|O81221|P00544|P02574|P02576|P02578|P02581|P07829|P07830|P07836|P10981|P10982|P12431|P12717|P13363|P14235|P17126|P18499|P18602|P20904|P22131|P22132|P23344|P24263|P26182|P26197|P27131|P27132|P30161|P30162|P30163|P30164|P30165|P30167|P30168|P30169|P30170|P30171|P35432|P41112|P41113|P41339|P41341|P45885|P45886|P45887|P46258|P48465|P49871|P50138|…	ACT_ACHBI|ACT_BRUMA|ACT_CANAX|ACT_CANDC|ACT_CHLRE|ACT_COLSC|ACT_COPC7|ACT_COSCS|ACT_CRAGI|ACT_CRAVI|ACT_CRYNH|ACT_ENCCU|ACT_FUCVE|ACT_GOSHI|ACT_HYDVU|ACT_LUMRU|ACT_MANSE|ACT_MAYDE|ACT_MESVI|ACT_OXYRB|ACT_PHARH|ACT_PHYME|ACT_PLAMG|ACT_PUCGR|ACT_SCHDU|ACT_SPOLI|ACT_TOXGO|ACT_VOLCA|ACT1_ABSGL|ACT1_ACACA|ACT1_BACDO|ACT1_BOMMO|ACT1_DICDI|ACT1_ECHGR|ACT1_HELER|ACT1_HELTB|ACT1_LUMTE|ACT1_NAEFO|ACT1_ONCV…	3	2
41	P40911|P90519|Q00080|Q96WZ1	EF1A_AJECG|EF1A_COCIM|EF1A_CRYPV|EF1A_PLAFK	0	2
4	CON__P35527|P35527	CON__P35527|K1C9_HUMAN	0	1
12	A5A6H5|P15999|P19483|P25705|P80021|Q03265|Q5R546	ATPA_BOVIN|ATPA_HUMAN|ATPA_MOUSE|ATPA_PANTR|ATPA_PIG|ATPA_PONAB|ATPA_RAT	2	1
16	A2AQ07|A6NNZ2|CON__ENSEMBL:ENSBTAP00000025008|O04386|O17449|O44388|P02554|P04350|P04690|P05304|P07437|P08841|P09203|P09206|P09207|P09244|P09652|P09653|P10875|P11482|P11833|P12456|P13602|P18241|P18700|P22013|P22852|P24637|P30883|P32882|P32928|P35394|P36221|P41385|P41386|P41387|P41937|P50259|P50262|P52275|P61857|P61858|P68371|P68372|P69893|P69895|P69897|P79008|P83130|P85108|P86221|P99024|Q13509|Q13…	CON__ENSEMBL:ENSBTAP00000025008|TBB_BOMMO|TBB_CANAX|TBB_CHLIN|TBB_CHLRE|TBB_COPC7|TBB_ENCCU|TBB_ENCHE|TBB_ENTDO|TBB_GIAIN|TBB_HALDI|TBB_MELLI|TBB_ONCGI|TBB_PARLI|TBB_PIG|TBB_PNECA|TBB_POLAG|TBB_PORPU|TBB_PSEAM|TBB_PYRYE|TBB_STRPU|TBB_TRITR|TBB_UROFA|TBB1_BRUPA|TBB1_CAEBR|TBB1_CAEEL|TBB1_CHICK|TBB1_CHOCR|TBB1_COLGL|TBB1_COLGR|TBB1_DROME|TBB1_ECHMU|TBB1_GADMO|TBB1_GLOMM|TBB1_HOMAM|TBB1_HUMAN|TBB1_M…	6	1
21	P02543|P02544|P08670|P20152|P24789|P31000|P48616|P48670|P48673|P84198|Q4R4X4|Q5R1W8	VIM1_XENLA|VIMB_CARAU|VIME_BOVIN|VIME_CHLAE|VIME_CRIGR|VIME_HUMAN|VIME_MACFA|VIME_MESAU|VIME_MOUSE|VIME_PANTR|VIME_PIG|VIME_RAT	2	1
25	P07756|P31327|Q8C196	CPSM_HUMAN|CPSM_MOUSE|CPSM_RAT	2	1
26	P08199|P09405|P13383|P19338|Q4R4J7|Q5RF26	NUCL_HUMAN|NUCL_MACFA|NUCL_MESAU|NUCL_MOUSE|NUCL_PONAB|NUCL_RAT	0	1
27	O57521|P08238|P11499|P30947|P34058|Q04619|Q4R4T5|Q58FF7|Q5R710|Q6AZV1|Q76LV1|Q9BLC5|Q9GKX8	H90B3_HUMAN|HS90B_BOVIN|HS90B_CHICK|HS90B_DANRE|HS90B_HORSE|HS90B_HUMAN|HS90B_MACFA|HS90B_MOUSE|HS90B_PONAB|HS90B_RABIT|HS90B_RAT|HS90B_XENLA|HSP83_BOMMO	3	1
30	P10668|P18760|P23528|P45592|Q4R5C0|Q5E9F7|Q6B7M7	COF1_BOVIN|COF1_HUMAN|COF1_MACFA|COF1_MOUSE|COF1_PIG|COF1_RAT|COF1_SHEEP	1	1
31	O02649|P10809|P18687|P31081|P63038|P63039|P86206|Q5NVM5|Q5ZL72|Q9VMN5	CH60_BOVIN|CH60_CHICK|CH60_CRIGR|CH60_HUMAN|CH60_MESAU|CH60_MOUSE|CH60_PONAB|CH60_RAT|CH60A_DROME|CH60C_DROME	2	1
32	P10990|P12716|P53465|P53472|P53473|P53474|P69004|P69005|Q07903|Q25379|Q25380	ACT1_LYTPI|ACT1_MESFR|ACT2_MESFR|ACT3_LYTPI|ACT4_LYTPI|ACTA_STRPU|ACTB_STRPU|ACTC_PISOC|ACTC_STRPU|ACTD_STRPU|ACTE_STRPU	0	1
34	P00548|P11974|P11979|P11980|P14618|P52480|Q5NVN0|Q92122	KPYM_CHICK|KPYM_FELCA|KPYM_HUMAN|KPYM_MOUSE|KPYM_PONAB|KPYM_RABIT|KPYM_RAT|KPYM_XENLA	4	1
35	O18750|P08110|P08113|P08712|P14625|P41148|P84577|Q29092|Q4R520|Q5R6F7|Q66HD0|Q95M18|Q9SIF2	ENPL_BOVIN|ENPL_CANLF|ENPL_CHICK|ENPL_HUMAN|ENPL_MACFA|ENPL_MESAU|ENPL_MOUSE|ENPL_PIG|ENPL_PONAB|ENPL_RABIT|ENPL_RAT|HS905_ARATH|HSP90_POPEU	3	1
42	O43109|P02829|P15108|P40292|P41887|P46598|Q8J2M3	HSC82_YEAST|HSP82_ASHGO|HSP82_YEAST|HSP90_ASPFU|HSP90_CANAL|HSP90_PODAS|HSP90_SCHPO	1	1
44	Q01233	HSP70_NEUCR	0	1
9	A2BDB0|O18840|O42161|O93400|P02572|P04829|P07837|P0DM41|P0DM42|P10984|P10986|P10987|P15475|P18601|P18603|P29751|P41340|P48975|P49128|P53456|P53478|P53485|P53486|P53505|P53506|P60706|P60707|P60708|P60709|P60710|P60711|P60712|P60713|P63256|P63257|P63258|P63259|P63260|P63261|P68142|P68143|P68555|P68556|P79818|P83750|P83751|P84183|P84184|P84185|P84336|P84856|Q00215|Q25010|Q4L0Y2|Q4R561|Q5JAK2|Q5R1X3|…	ACT_TAESO|ACT1_AEDAE|ACT1_CAEEL|ACT1_DIBDE|ACT1_DROME|ACT2_ARTSX|ACT2_BOMMO|ACT2_CAEEL|ACT2_DIBDE|ACT2_DROME|ACT3_BOMMO|ACT3_CAEEL|ACT3_LIMPO|ACT3A_HELAM|ACT3B_HELAM|ACT4_ARTSX|ACT4_BOMMO|ACT4_CAEEL|ACT5_CHICK|ACT5_XENLA|ACT5C_ANOGA|ACT8_XENLA|ACTB_BOVIN|ACTB_CAMDR|ACTB_CANLF|ACTB_CAVPO|ACTB_CHICK|ACTB_CHLAE|ACTB_CHLPG|ACTB_CRIGR|ACTB_CTEID|ACTB_CYPCA|ACTB_HORSE|ACTB_HUMAN|ACTB_MACFA|ACTB_MESAU|A…	1	0
13	A5A6I5|P00883|P04075|P05064|P05065|Q5NVR5	ALDOA_HUMAN|ALDOA_MOUSE|ALDOA_PANTR|ALDOA_PONAB|ALDOA_RABIT|ALDOA_RAT	3	0
17	O19049|P61978|P61979|P61980|Q3T0D0|Q4R4M6|Q5R5H8|Q5ZIQ3	HNRPK_BOVIN|HNRPK_CHICK|HNRPK_HUMAN|HNRPK_MACFA|HNRPK_MOUSE|HNRPK_PONAB|HNRPK_RABIT|HNRPK_RAT	2	0
20	B0BM40|P00939|P00940|P00941|P15426|P17751|P54714|P60174|P60175|P86216|Q1MTI4|Q29371|Q2QD07|Q5E956|Q5R928|Q60HC9|Q90XG0	TPIS_BOVIN|TPIS_CANLF|TPIS_CHICK|TPIS_GORGO|TPIS_HUMAN|TPIS_LATCH|TPIS_MACFA|TPIS_MACMU|TPIS_MESAU|TPIS_MOUSE|TPIS_PANTR|TPIS_PIG|TPIS_PONAB|TPIS_RABIT|TPIS_XENTR|TPISA_DANRE|TPISB_DANRE	2	0
23	P02309|P02310|P04914|P04915|P08436|P0CG89|P23750|P23751|P27996|P35057|P35059|P40287|P50566|P59259|P62776|P62777|P62778|P62779|P62780|P62781|P62782|P62783|P62784|P62785|P62786|P62787|P62788|P62790|P62791|P62794|P62795|P62796|P62797|P62798|P62799|P62800|P62801|P62802|P62803|P62804|P62805|P62806|P62887|P69151|P69152|P70081|P80739|P82888|P83865|P84040|P84041|P84042|P84043|P84044|P84045|P84046|P84047|…	H4_ACRAS|H4_ACRFO|H4_APIME|H4_APLCA|H4_ARATH|H4_ASCSU|H4_ASEAQ|H4_ASPFU|H4_ASPOR|H4_BLAAD|H4_BOVIN|H4_CAEEL|H4_CAIMO|H4_CANGA|H4_CAPAN|H4_CHAVR|H4_CHEMJ|H4_CHICK|H4_CHITH|H4_CHLRE|H4_DENKL|H4_DIAPU|H4_DICDI|H4_DROER|H4_DROHY|H4_DROMA|H4_DROME|H4_DROOR|H4_DROSE|H4_DROSI|H4_DROTE|H4_DROYA|H4_EIMTE|H4_ENTHI|H4_EUCGL|H4_EUPCR|H4_FLATR|H4_HOLTU|H4_HUMAN|H4_LOLTE|H4_LYTPI|H4_MACFA|H4_MAIZE|H4_MASBA|H4_…	3	0
38	P23254	TKT1_YEAST	2	0
39	P25698	EF1A_SOYBN	1	0
43	P78371|P80314|P86245|Q3ZBH0|Q4R6F8|Q5XIM9	TCPB_BOVIN|TCPB_HUMAN|TCPB_MACFA|TCPB_MESAU|TCPB_MOUSE|TCPB_RAT	2	0
46	A1XQV4|CON__Q3SX28|P02561|P04268|P04692|P06753|P07951|P09493|P09495|P13104|P13105|P19352|P21107|P42639|P58771|P58772|P58773|P58774|P58775|P58776|P67936|P67937|P84335|Q01173|Q5KR47|Q5KR48|Q5KR49|Q63610|Q9NDS0	CON__Q3SX28|TPM_BRABE|TPM1_BOVIN|TPM1_CHEAU|TPM1_CHICK|TPM1_COTJA|TPM1_DANRE|TPM1_HUMAN|TPM1_MOUSE|TPM1_PIG|TPM1_RABIT|TPM1_RANTE|TPM1_RAT|TPM1_XENLA|TPM2_BOVIN|TPM2_CHICK|TPM2_HUMAN|TPM2_MOUSE|TPM2_RABIT|TPM2_RAT|TPM3_BOVIN|TPM3_HUMAN|TPM3_MOUSE|TPM3_PIG|TPM3_RAT|TPM4_HORSE|TPM4_HUMAN|TPM4_PIG|TPM4_RAT	2	0

## Sheet: MPro_contaminant_GluC
id	Uniprot.ID	Protein.ID	MS.MS.Count_CTRL	MS.MS.Count_MPro
0	CON__P0C1U8|P0C1U8|Q2FZL2|Q5HH35|Q6GAG4|Q6GI34|Q7A6A6|Q8NX98|Q99V45	CON__P0C1U8|SSPA_STAA8|SSPA_STAAC|SSPA_STAAM|SSPA_STAAN|SSPA_STAAR|SSPA_STAAS|SSPA_STAAU|SSPA_STAAW	0	9
2	MPro|P0DTC1|P0DTD1	MPro|R1A_SARS2|R1AB_SARS2	0	9
21	A1JQE6|A9NHC6|Q12306|Q8GBD4	GBPA_YERE8|GBPA_YEREN|RS2_ACHLI|SMT3_YEAST	0	9
13	A8X775	DLK1_CAEBR	0	2
19	P75471	HMW2_MYCPN	1	2
25	Q88M41	MINC_PSEPK	0	2
1	CON__P35527|P35527	CON__P35527|K1C9_HUMAN	0	1
5	A0L170|A0LEH2|A0LKS4|A1AJ51|A1JIP3|A1RNN6|A1SAC0|A1VCQ0|A3D8W9|A3N120|A3QA46|A4TRR0|A4W5N8|A4Y398|A5U9V2|A5UH48|A6TH53|A6VM38|A6WJ17|A7FN01|A7HQQ0|A7MMC0|A7ZV12|A8A7N9|A8AMQ6|A8FQY1|A8G8S7|A8H8W3|A8LJP9|A8ZU48|A9KC15|A9MFR9|A9N3Z7|A9NA82|A9QYQ1|B0BPV1|B0TVL3|B0USK6|B1ITQ5|B1JMR1|B1KIR6|B1LQG4|B1XDP7|B2K1Y4|B2TY18|B2VL84|B3H1P4|B4EXE2|B4S112|B4TF80|B4TSC6|B5BKF4|B5F2L0|B5FRK2|B5R005|B5R991|B5Y368|…	CH60_ACTP2|CH60_ACTP7|CH60_ACTPJ|CH60_ACTPL|CH60_ACTSZ|CH60_AGGAC|CH60_ALCBS|CH60_ALTMD|CH60_BAUCH|CH60_BLOFL|CH60_BLOPB|CH60_BUCA5|CH60_BUCAI|CH60_BUCAP|CH60_BUCAT|CH60_BUCBP|CH60_BUCCC|CH60_BUCCM|CH60_BUCMP|CH60_BUCPP|CH60_BUCRM|CH60_BUCRP|CH60_BUCTC|CH60_BUCTS|CH60_CITK8|CH60_COLMA|CH60_COXB1|CH60_COXB2|CH60_COXBN|CH60_COXBR|CH60_COXBU|CH60_CROS8|CH60_DESAG|CH60_DESMR|CH60_DESOH|CH60_DESVH|CH6…	0	1
7	A1B495|A3PIX1|A4WU31|A8LIT9|O07310|P29916|Q0C1E4|Q163Q5|Q1GIN9|Q28T72|Q3J3F8|Q5LPR7	NQO4_PARDE|NUOD_DINSH|NUOD_HYPNUOD_JANSC|NUOD_PARDP|NUOD_RHOCA|NUOD_RHOS1|NUOD_RHOS4|NUOD_RHOS5|NUOD_ROSDO|NUOD_RUEPO|NUOD_RUEST	0	1
8	A2A870|Q5ZIB2|Q8TES7	FBF1_CHICK|FBF1_HUMAN|FBF1_MOUSE	0	1
9	A3MZT3|A4W6R5|A5UDG1|A5UI56|A6T4X2|A6VME8|A7MGT1|A7ZHR0|A7ZWB6|A8ALC0|B0BUC5|B1IQH1|B1LGX2|B1XD39|B2U313|B3GXB1|B4SUZ9|B4TK45|B4TXS2|B5BAM7|B5F8T1|B5FJ17|B5R3I3|B5RHF5|B5Y1K1|B5Z0E9|B6HZE4|B7LGN1|B7LWA9|B7M1B0|B7MBF1|B7MP30|B7N837|B7NID1|B7UIL5|C4ZRR2|C5BHB7|C6DAI4|P0A6P1|P0A6P2|P0A6P3|P0A6P4|P43894|P57983|P64052|P64053|Q0T839|Q0TLG3|Q1RG19|Q2W4C4|Q325X0|Q32JT9|Q3Z5I8|Q4QLZ5|Q57T38|Q5PD62|Q65R71|…	EFTS_ACTP2|EFTS_ACTP7|EFTS_ACTPJ|EFTS_ACTSZ|EFTS_CITK8|EFTS_CROS8|EFTS_ECO24|EFTS_ECO27|EFTS_ECO45|EFTS_ECO55|EFTS_ECO57|EFTS_ECO5E|EFTS_ECO7I|EFTS_ECO81|EFTS_ECO8A|EFTS_ECOBW|EFTS_ECODH|EFTS_ECOHS|EFTS_ECOL5|EFTS_ECOL6|EFTS_ECOLC|EFTS_ECOLI|EFTS_ECOLU|EFTS_ECOSE|EFTS_ECOSM|EFTS_ECOUT|EFTS_EDWI9|EFTS_ENT38|EFTS_ESCF3|EFTS_HAEDU|EFTS_HAEI8|EFTS_HAEIE|EFTS_HAEIG|EFTS_HAEIN|EFTS_KLEP3|EFTS_KLEP7|EFT…	0	1
10	A5CTA8|B0RH60|C1A306|Q24MW5|Q6ADR6	ENO_CLAM3|ENO_CLAMS|ENO_LEIXX|ENO_RHOE4|ENO2_DESHY	0	1
12	A8ESX7	ALR_ARCB4	0	1
14	O46382	BIG1_BOVIN	0	1
15	P31824	ACBP_MANSE	0	1
16	P35580|Q27991|Q61879|Q9JLT0	MYH10_BOVIN|MYH10_HUMAN|MYH10_MOUSE|MYH10_RAT	2	1
17	P43906|Q02XD2	AROK_LACLM|AROK_LACLS	0	1
22	Q4LE88	S45A2_PIG	0	1
24	Q6BJY4	SMI2_DEBHA	0	1
26	Q8BZM1	GLMN_MOUSE	1	1
27	Q972C3	GCSH1_SULTO	0	1
29	Q9K6H2	ATPD_BACHD	0	1
6	A0PV48|A1KPT5|A5U8S5|B2HJ44|C1AI58|P9WPA0|P9WPA1|Q7TW42	COAX_MYCBO|COAX_MYCBP|COAX_MYCBT|COAX_MYCMM|COAX_MYCTA|COAX_MYCTO|COAX_MYCTU|COAX_MYCUA	1	0
