# Supplementary material for: The Main protease (Mpro) from SARS-CoV-2 triggers plasma clotting in vitro by activating coagulation factors VII and FXII
Source: Research Square preprint supplement (doi:10.21203/rs.3.rs-4959212/v1), 2024-11-13
Supplement: Supplementary file 3 [file 63c2d38453d0350d2dfdf4af.xlsx]

## Sheet: Table_legend
Table legend
FVII_DDA_SpectroMine_output_dat	Detected peptides obtained by treatment of FVII with Mpro or control (Mpro buffer) for 3h at 37C , followed by TAILS
FVII_PRM_Skyline_output	Targeted analysis to probe the FVII activation peptide: [DimethNterl]IVGGKVCPK[DimethLys]GECPWQVLLLVNG (fragment intensities)
FVII_PRM_Peptide_intensity	Targeted analysis to probe the FVII activation peptide: [DimethNterl]IVGGKVCPK[DimethLys]GECPWQVLLLVNG (peptide intensities)
FVII_cleavage_sites	Mpro-mediated cleavage sites on FVII, not identified in any of the control samples and present in at least 2 replicates of the Mpro treated samples. The peptide generated by the cleavage at the FVII activation site, not identified in the controls but identified in only one of the Mpro-treated replicates, is also reported.
FXII_SpectroMine_output	Detected peptides obtained by treatment of FXII with Mpro or control (Mpro buffer) for 3h at 37C or at time 0 , followed by TAILS .
FXII_cleavage_sites	Mpro-mediated cleavage sites on FXII, not identified in any of the control samples (at 0min or after 3h of control treatment) and present in at least 2 replicates of the Mpro treated samples.

## Sheet: FVII_DDA_SpectroMine_output_dat
E.Revision	E.Name	Replicate.Label-Free Quant	R.Date	R.FileName	R.NumberOfSearches	R.Spectra	PG.UniprotIds	PG.Coverage	PG.PSMs	PG.Qvalue	PG.Score	PG.Label-Free Quant	PG.PSMsForQuant	PEP.IsProteinGroupSpecific	PEP.IsProteotypic	PEP.MolecularWeight	PEP.StrippedSequence	PEP.Qvalue	PP.Charge	PP.PIMID	PP.RunEvidenceCount	PP.RTEmpirical	PP.Label-Free Quant
3.2.220222.52329	20230926_apagotto_AP14bis_FVII_1ul_all	1	20230920_215630	230920_EC1_apagotto_AP14bis_VII_1.raw	2	17065	P08709	0.44	74	0	1.55098	11590390	12	True	True	1535.8	SEPRPGVLLRAPFP	0	3	_SEPRPGVLLRAPFP_	6	58.4436	92912.5
3.2.220222.52329	20230926_apagotto_AP14bis_FVII_1ul_all	1	20230920_215630	230920_EC1_apagotto_AP14bis_VII_1.raw	2	17065	P08709	0.44	74	0	1.55098	11590390	12	True	True	1535.8	SEPRPGVLLRAPFP	0	2	_SEPRPGVLLRAPFP_	5	57.8267	10009790
3.2.220222.52329	20230926_apagotto_AP14bis_FVII_1ul_all	1	20230920_215630	230920_EC1_apagotto_AP14bis_VII_1.raw	2	17065	P08709	0.44	74	0	1.55098	11590390	12	True	True	1875.01	NCETHKDDQLICVNEN	0	3	_[DimethNter0]NC[Carbamidomethyl (C)]ETHKDDQLIC[Carbamidomethyl (C)]VNEN_	6	33.8717	187911
3.2.220222.52329	20230926_apagotto_AP14bis_FVII_1ul_all	1	20230920_215630	230920_EC1_apagotto_AP14bis_VII_1.raw	2	17065	P08709	0.44	74	0	1.55098	11590390	12	True	True	1322.51	LMTQDCLQQSR	0	2	_LM[Oxidation (M)]TQDC[Carbamidomethyl (C)]LQQSR_	6	28.9537	793907
3.2.220222.52329	20230926_apagotto_AP14bis_FVII_1ul_all	1	20230920_215630	230920_EC1_apagotto_AP14bis_VII_1.raw	2	17065	P08709	0.44	74	0	1.55098	11590390	12	True	True	1322.51	LMTQDCLQQSR	0	2	_LMTQDC[Carbamidomethyl (C)]LQQSR_	6	30.2755	154841
3.2.220222.52329	20230926_apagotto_AP14bis_FVII_1ul_all	1	20230920_215630	230920_EC1_apagotto_AP14bis_VII_1.raw	2	17065	P08709	0.44	74	0	1.55098	11590390	12	True	True	2490.62	NLIAVLGEHDLSEHDGDEQSRR	0	4	_NLIAVLGEHDLSEHDGDEQSRR_	6	50.092	110960
3.2.220222.52329	20230926_apagotto_AP14bis_FVII_1ul_all	1	20230920_215630	230920_EC1_apagotto_AP14bis_VII_1.raw	2	17065	P08709	0.44	74	0	1.55098	11590390	12	True	True	1319.61	PRPGVLLRAPFP	0	2	_PRPGVLLRAPFP_	6	57.6919	240066
3.2.220222.52329	20230926_apagotto_AP14bis_FVII_1ul_all	1	20230920_215630	230920_EC1_apagotto_AP14bis_VII_1.raw	2	17065	P08709	0.44	74	0	1.55098	11590390	12	True	True	2165.58	LHQPVVLTDHVVPLCLPER	0	4	_LHQPVVLTDHVVPLC[Carbamidomethyl (C)]LPER_	6	58.3772	47414.8
3.2.220222.52329	20230926_apagotto_AP14bis_FVII_1ul_all	1	20230920_215630	230920_EC1_apagotto_AP14bis_VII_1.raw	2	17065	P08709	0.44	74	0	1.55098	11590390	12	True	True	2165.58	LHQPVVLTDHVVPLCLPER	0	3	_LHQPVVLTDHVVPLC[Carbamidomethyl (C)]LPER_	3	58.3639	84914.7
3.2.220222.52329	20230926_apagotto_AP14bis_FVII_1ul_all	1	20230920_215630	230920_EC1_apagotto_AP14bis_VII_1.raw	2	17065	P08709	0.44	74	0	1.55098	11590390	12	True	True	892.036	CLPAFEGR	0	2	_C[Carbamidomethyl (C)]LPAFEGR_	6	38.6686	82049.6
3.2.220222.52329	20230926_apagotto_AP14bis_FVII_1ul_all	1	20230920_215630	230920_EC1_apagotto_AP14bis_VII_1.raw	2	17065	P08709	0.44	74	0	1.55098	11590390	12	True	True	892.036	CLPAFEGR	0	2	_[DimethNter0]C[Carbamidomethyl (C)]LPAFEGR_	2	42.6038	49568.1
3.2.220222.52329	20230926_apagotto_AP14bis_FVII_1ul_all	1	20230920_215630	230920_EC1_apagotto_AP14bis_VII_1.raw	2	17065	P08709	0.44	74	0	1.55098	11590390	12	True	True	1350.46	CHEGYSLLADGVS	0	2	_C[Carbamidomethyl (C)]HEGYSLLADGVS_	6	46.7813	269507
3.2.220222.52329	20230926_apagotto_AP14bis_FVII_1ul_all	1	20230920_215630	230920_EC1_apagotto_AP14bis_VII_1.raw	2	17065	P08709	0.44	74	0	1.55098	11590390	12	True	True	1207.35	ATVGHFGVYTR	0	3	_[DimethNter0]ATVGHFGVYTR_	6	36.8882	73713.5
3.2.220222.52329	20230926_apagotto_AP14bis_FVII_1ul_all	1	20230920_215630	230920_EC1_apagotto_AP14bis_VII_1.raw	2	17065	P08709	0.44	74	0	1.55098	11590390	12	True	True	1566.86	LHQPVVLTDHVVPL	0	3	_LHQPVVLTDHVVPL_	6	57.1278	61330
3.2.220222.52329	20230926_apagotto_AP14bis_FVII_1ul_all	1	20230920_215630	230920_EC1_apagotto_AP14bis_VII_1.raw	2	17065	P08709	0.44	74	0	1.55098	11590390	12	True	True	1566.86	LHQPVVLTDHVVPL	0	2	_LHQPVVLTDHVVPL_	5	57.1048	65800.5
3.2.220222.52329	20230926_apagotto_AP14bis_FVII_1ul_all	1	20230920_215630	230920_EC1_apagotto_AP14bis_VII_1.raw	2	17065	P08709	0.44	74	0	1.55098	11590390	12	True	True	2478.87	VAQVIIPSTYVPGTTNHDIALLR	0	3	_VAQVIIPSTYVPGTTNHDIALLR_	6	63.9127	61503.2
3.2.220222.52329	20230926_apagotto_AP14bis_FVII_1ul_all	1	20230920_215630	230920_EC1_apagotto_AP14bis_VII_1.raw	2	17065	P08709	0.44	74	0	1.55098	11590390	12	True	True	2478.87	VAQVIIPSTYVPGTTNHDIALLR	0	2	_VAQVIIPSTYVPGTTNHDIALLR_	5	63.9788	50243.9
3.2.220222.52329	20230926_apagotto_AP14bis_FVII_1ul_all	1	20230920_215630	230920_EC1_apagotto_AP14bis_VII_1.raw	2	17065	P08709	0.44	74	0	1.55098	11590390	12	True	True	2478.87	VAQVIIPSTYVPGTTNHDIALLR	0	3	_[DimethNter0]VAQVIIPSTYVPGTTNHDIALLR_	5	65.0971	34211.3
3.2.220222.52329	20230926_apagotto_AP14bis_FVII_1ul_all	1	20230920_215630	230920_EC1_apagotto_AP14bis_VII_1.raw	2	17065	P08709	0.44	74	0	1.55098	11590390	12	True	True	1326.51	TFSERTLAFVR	0	3	_TFSERTLAFVR_	6	47.0776	58711.6
3.2.220222.52329	20230926_apagotto_AP14bis_FVII_1ul_all	1	20230920_215630	230920_EC1_apagotto_AP14bis_VII_1.raw	2	17065	P08709	0.44	74	0	1.55098	11590390	12	True	True	1107.2	CHEGYSLLAD	0	2	_C[Carbamidomethyl (C)]HEGYSLLAD_	6	41.9522	93075
3.2.220222.52329	20230926_apagotto_AP14bis_FVII_1ul_all	1	20230920_215630	230920_EC1_apagotto_AP14bis_VII_1.raw	2	17065	P08709	0.44	74	0	1.55098	11590390	12	True	True	2635.06	RVAQVIIPSTYVPGTTNHDIALLR	0	4	_RVAQVIIPSTYVPGTTNHDIALLR_	6	59.8121	57991.1
3.2.220222.52329	20230926_apagotto_AP14bis_FVII_1ul_all	1	20230920_215630	230920_EC1_apagotto_AP14bis_VII_1.raw	2	17065	P08709	0.44	74	0	1.55098	11590390	12	True	True	2635.06	RVAQVIIPSTYVPGTTNHDIALLR	0	3	_RVAQVIIPSTYVPGTTNHDIALLR_	6	59.8121	56784.6
3.2.220222.52329	20230926_apagotto_AP14bis_FVII_1ul_all	1	20230920_215630	230920_EC1_apagotto_AP14bis_VII_1.raw	2	17065	P08709	0.44	74	0	1.55098	11590390	12	True	True	2635.06	RVAQVIIPSTYVPGTTNHDIALLR	0	4	_[DimethNter0]RVAQVIIPSTYVPGTTNHDIALLR_	3	60.6607	17996
3.2.220222.52329	20230926_apagotto_AP14bis_FVII_1ul_all	1	20230920_215630	230920_EC1_apagotto_AP14bis_VII_1.raw	2	17065	P08709	0.44	74	0	1.55098	11590390	12	True	True	1021.18	LHQPVVLTD	0	2	_LHQPVVLTD_	6	38.6885	52883.8
3.2.220222.52329	20230926_apagotto_AP14bis_FVII_1ul_all	1	20230920_215630	230920_EC1_apagotto_AP14bis_VII_1.raw	2	17065	P08709	0.44	74	0	1.55098	11590390	12	True	True	2334.44	NLIAVLGEHDLSEHDGDEQSR	0	3	_NLIAVLGEHDLSEHDGDEQSR_	6	51.6817	51360
3.2.220222.52329	20230926_apagotto_AP14bis_FVII_1ul_all	1	20230920_215630	230920_EC1_apagotto_AP14bis_VII_1.raw	2	17065	P08709	0.44	74	0	1.55098	11590390	12	True	True	967.128	SEPRPGVLL	0	2	_SEPRPGVLL_	6	45.4084	49680.3
3.2.220222.52329	20230926_apagotto_AP14bis_FVII_1ul_all	1	20230920_215630	230920_EC1_apagotto_AP14bis_VII_1.raw	2	17065	P08709	0.44	74	0	1.55098	11590390	12	True	True	1123.32	SEPRPGVLLR	0	3	_SEPRPGVLLR_	5	34.9567	49364
3.2.220222.52329	20230926_apagotto_AP14bis_FVII_1ul_all	1	20230920_215630	230920_EC1_apagotto_AP14bis_VII_1.raw	2	17065	P08709	0.44	74	0	1.55098	11590390	12	True	True	1696.87	SCRCHEGYSLLADGVS	0	3	_SC[Carbamidomethyl (C)]RC[Carbamidomethyl (C)]HEGYSLLADGVS_	6	42.333	264109
3.2.220222.52329	20230926_apagotto_AP14bis_FVII_1ul_all	1	20230920_215630	230920_EC1_apagotto_AP14bis_VII_1.raw	2	17065	P08709	0.44	74	0	1.55098	11590390	12	True	True	1367.54	GCATVGHFGVYTR	0	2	_GC[Carbamidomethyl (C)]ATVGHFGVYTR_	2	37.2722	37640
3.2.220222.52329	20230926_apagotto_AP14bis_FVII_1ul_all	1	20230920_215630	230920_EC1_apagotto_AP14bis_VII_1.raw	2	17065	P08709	0.44	74	0	1.55098	11590390	12	True	True	2786.24	LHQPVVLTDHVVPLCLPERTFSER	0	5	_LHQPVVLTDHVVPLC[Carbamidomethyl (C)]LPERTFSER_	6	59.1637	36360.6
3.2.220222.52329	20230926_apagotto_AP14bis_FVII_1ul_all	1	20230920_215630	230920_EC1_apagotto_AP14bis_VII_1.raw	2	17065	P08709	0.44	74	0	1.55098	11590390	12	True	True	2786.24	LHQPVVLTDHVVPLCLPERTFSER	0	4	_LHQPVVLTDHVVPLC[Carbamidomethyl (C)]LPERTFSER_	5	58.7721	9792.39
3.2.220222.52329	20230926_apagotto_AP14bis_FVII_1ul_all	1	20230920_215630	230920_EC1_apagotto_AP14bis_VII_1.raw	2	17065	P08709	0.44	74	0	1.55098	11590390	12	True	True	1136.27	TVGHFGVYTR	0	3	_[DimethNter0]TVGHFGVYTR_	5	35.3353	85852.7
3.2.220222.52329	20230926_apagotto_AP14bis_FVII_1ul_all	1	20230920_215630	230920_EC1_apagotto_AP14bis_VII_1.raw	2	17065	P08709	0.44	74	0	1.55098	11590390	12	True	True	1279.5	RSEPRPGVLLR	0	3	_RSEPRPGVLLR_	5	30.4314	73351.8
3.2.220222.52329	20230926_apagotto_AP14bis_FVII_1ul_all	1	20230920_215630	230920_EC1_apagotto_AP14bis_VII_1.raw	2	17065	P08709	0.44	74	0	1.55098	11590390	12	True	True	836.985	HDIALLR	0	2	_HDIALLR_	5	35.9759	53480.6
3.2.220222.52329	20230926_apagotto_AP14bis_FVII_1ul_all	1	20230920_215630	230920_EC1_apagotto_AP14bis_VII_1.raw	2	17065	P08709	0.44	74	0	1.55098	11590390	12	True	True	836.985	HDIALLR	0	2	_[DimethNter0]HDIALLR_	2	36.8882	58615.9
3.2.220222.52329	20230926_apagotto_AP14bis_FVII_1ul_all	1	20230920_215630	230920_EC1_apagotto_AP14bis_VII_1.raw	2	17065	P08709	0.44	74	0	1.55098	11590390	12	True	True	1659.9	VAQVIIPSTYVPGTTN	0	2	_VAQVIIPSTYVPGTTN_	5	58.5357	124986
3.2.220222.52329	20230926_apagotto_AP14bis_FVII_1ul_all	1	20230920_215630	230920_EC1_apagotto_AP14bis_VII_1.raw	2	17065	P08709	0.44	74	0	1.55098	11590390	12	True	True	912.138	VLLRAPFP	0	2	_VLLRAPFP_	4	57.508	54399.3
3.2.220222.52329	20230926_apagotto_AP14bis_FVII_1ul_all	1	20230920_215630	230920_EC1_apagotto_AP14bis_VII_1.raw	2	17065	P08709	0.44	74	0	1.55098	11590390	12	True	True	1639.97	RGATALELMVLNVPR	0	3	_[DimethNter0]RGATALELM[Oxidation (M)]VLNVPR_	2	56.9715	27550.3
3.2.220222.52329	20230926_apagotto_AP14bis_FVII_1ul_all	1	20230920_215630	230920_EC1_apagotto_AP14bis_VII_1.raw	2	17065	P08709	0.44	74	0	1.55098	11590390	12	True	True	3474.08	LHQPVVLTDHVVPLCLPERTFSERTLAFVR	0	4	_LHQPVVLTDHVVPLC[Carbamidomethyl (C)]LPERTFSERTLAFVR_	4	65.7715	21593.7
3.2.220222.52329	20230926_apagotto_AP14bis_FVII_1ul_all	1	20230920_215630	230920_EC1_apagotto_AP14bis_VII_1.raw	2	17065	P08709	0.44	74	0	1.55098	11590390	12	True	True	2691.01	SCRCHEGYSLLADGVSCTPTVEYPC	0	3	_SC[Carbamidomethyl (C)]RC[Carbamidomethyl (C)]HEGYSLLADGVSC[Carbamidomethyl (C)]TPTVEYPC[Carbamidomethyl (C)]_	4	53.4635	96486.8
3.2.220222.52329	20230926_apagotto_AP14bis_FVII_1ul_all	1	20230920_215630	230920_EC1_apagotto_AP14bis_VII_1.raw	2	17065	P08709	0.44	74	0	1.55098	11590390	12	True	True	1661.78	NLIAVLGEHDLSEHD	0	2	_NLIAVLGEHDLSEHD_	4	56.4217	54729.6
3.2.220222.52329	20230926_apagotto_AP14bis_FVII_1ul_all	1	20230920_215630	230920_EC1_apagotto_AP14bis_VII_1.raw	2	17065	P08709	0.44	74	0	1.55098	11590390	12	True	True	2344.61	CHEGYSLLADGVSCTPTVEYPC	0	2	_C[Carbamidomethyl (C)]HEGYSLLADGVSC[Carbamidomethyl (C)]TPTVEYPC[Carbamidomethyl (C)]_	4	57.2372	49902.7
3.2.220222.52329	20230926_apagotto_AP14bis_FVII_1ul_all	1	20230920_215630	230920_EC1_apagotto_AP14bis_VII_1.raw	2	17065	P08709	0.44	74	0	1.55098	11590390	12	True	True	3379.9	CHEGYSLLADGVSCTPTVEYPCGKIPILEKR	0	4	_C[Carbamidomethyl (C)]HEGYSLLADGVSC[Carbamidomethyl (C)]TPTVEYPC[Carbamidomethyl (C)]GK[DimethLys0]IPILEK[DimethLys0]R_	3	59.5649	28751.1
3.2.220222.52329	20230926_apagotto_AP14bis_FVII_1ul_all	1	20230920_215630	230920_EC1_apagotto_AP14bis_VII_1.raw	2	17065	P08709	0.44	74	0	1.55098	11590390	12	True	True	3307.71	GDEQSRRVAQVIIPSTYVPGTTNHDIALLR	0	4	_[DimethNter0]GDEQSRRVAQVIIPSTYVPGTTNHDIALLR_	4	59.1437	12008.7
3.2.220222.52329	20230926_apagotto_AP14bis_FVII_1ul_all	1	20230920_215630	230920_EC1_apagotto_AP14bis_VII_1.raw	2	17065	P08709	0.44	74	0	1.55098	11590390	12	True	True	1641.75	GGCEQYCSDHTGTKR	0	4	_[DimethNter0]GGC[Carbamidomethyl (C)]EQYC[Carbamidomethyl (C)]SDHTGTK[DimethLys0]R_	3	18.5063	84984.8
3.2.220222.52329	20230926_apagotto_AP14bis_FVII_1ul_all	1	20230920_215630	230920_EC1_apagotto_AP14bis_VII_1.raw	2	17065	P08709	0.44	74	0	1.55098	11590390	12	True	True	804.983	LHQPVVL	0	2	_LHQPVVL_	3	42.4602	59215.7
3.2.220222.52329	20230926_apagotto_AP14bis_FVII_1ul_all	1	20230920_215630	230920_EC1_apagotto_AP14bis_VII_1.raw	2	17065	P08709	0.44	74	0	1.55098	11590390	12	True	True	1483.78	GATALELMVLNVPR	0	2	_GATALELM[Oxidation (M)]VLNVPR_	3	61.7651	52697.6
3.2.220222.52329	20230926_apagotto_AP14bis_FVII_1ul_all	1	20230920_215630	230920_EC1_apagotto_AP14bis_VII_1.raw	2	17065	P08709	0.44	74	0	1.55098	11590390	12	True	True	1039.21	FCLPAFEGR	0	2	_FC[Carbamidomethyl (C)]LPAFEGR_	3	57.0669	39312.5
3.2.220222.52329	20230926_apagotto_AP14bis_FVII_1ul_all	1	20230920_215630	230920_EC1_apagotto_AP14bis_VII_1.raw	2	17065	P08709	0.44	74	0	1.55098	11590390	12	True	True	1988.15	GGCEQYCSDHTGTKRSCR	0	4	_[DimethNter0]GGC[Carbamidomethyl (C)]EQYC[Carbamidomethyl (C)]SDHTGTK[DimethLys0]RSC[Carbamidomethyl (C)]R_	2	18.1352	123894
3.2.220222.52329	20230926_apagotto_AP14bis_FVII_1ul_all	1	20230920_215630	230920_EC1_apagotto_AP14bis_VII_1.raw	2	17065	P08709	0.44	74	0	1.55098	11590390	12	True	True	1988.15	GGCEQYCSDHTGTKRSCR	0	5	_[DimethNter0]GGC[Carbamidomethyl (C)]EQYC[Carbamidomethyl (C)]SDHTGTK[DimethLys0]RSC[Carbamidomethyl (C)]R_	2	18.1617	71750.8
3.2.220222.52329	20230926_apagotto_AP14bis_FVII_1ul_all	1	20230920_215630	230920_EC1_apagotto_AP14bis_VII_1.raw	2	17065	P08709	0.44	74	0	1.55098	11590390	12	True	True	1552.72	GQGCATVGHFGVYTR	0	3	_[DimethNter0]GQGC[Carbamidomethyl (C)]ATVGHFGVYTR_	2	38.4262	40232.5
3.2.220222.52329	20230926_apagotto_AP14bis_FVII_1ul_all	1	20230920_215630	230920_EC1_apagotto_AP14bis_VII_1.raw	2	17065	P08709	0.44	74	0	1.55098	11590390	12	True	True	4626.44	VAQVIIPSTYVPGTTNHDIALLRLHQPVVLTDHVVPLCLPER	0	5	_VAQVIIPSTYVPGTTNHDIALLRLHQPVVLTDHVVPLC[Carbamidomethyl (C)]LPER_	2	67.415	21998.7
3.2.220222.52329	20230926_apagotto_AP14bis_FVII_1ul_all	1	20230920_215630	230920_EC1_apagotto_AP14bis_VII_1.raw	2	17065	P08709	0.44	74	0	1.55098	11590390	12	True	True	4626.44	VAQVIIPSTYVPGTTNHDIALLRLHQPVVLTDHVVPLCLPER	0	4	_VAQVIIPSTYVPGTTNHDIALLRLHQPVVLTDHVVPLC[Carbamidomethyl (C)]LPER_	1	67.4217	19308.7
3.2.220222.52329	20230926_apagotto_AP14bis_FVII_1ul_all	1	20230920_215630	230920_EC1_apagotto_AP14bis_VII_1.raw	2	17065	P08709	0.44	74	0	1.55098	11590390	12	True	True	1267.44	SCRCHEGYSLL	0	3	_SC[Carbamidomethyl (C)]RC[Carbamidomethyl (C)]HEGYSLL_	1	37.9807	61285.4
3.2.220222.52329	20230926_apagotto_AP14bis_FVII_1ul_all	1	20230920_215630	230920_EC1_apagotto_AP14bis_VII_1.raw	2	17065	P08709	0.44	74	0	1.55098	11590390	12	True	True	2092.25	NCETHKDDQLICVNENGGC	0	3	_NC[Carbamidomethyl (C)]ETHK[DimethLys0]DDQLIC[Carbamidomethyl (C)]VNENGGC[Carbamidomethyl (C)]_	1	34.0797	51247
3.2.220222.52329	20230926_apagotto_AP14bis_FVII_1ul_all	1	20230920_215630	230920_EC1_apagotto_AP14bis_VII_1.raw	2	17065	P08709	0.44	74	0	1.55098	11590390	12	True	True	2791.24	RRVAQVIIPSTYVPGTTNHDIALLR	0	4	_[DimethNter0]RRVAQVIIPSTYVPGTTNHDIALLR_	1	56.5882	31529
3.2.220222.52329	20230926_apagotto_AP14bis_FVII_1ul_all	1	20230920_215630	230920_EC1_apagotto_AP14bis_VII_1.raw	2	17065	P08709	0.44	74	0	1.55098	11590390	12	True	True	1193.36	NLIAVLGEHDL	0	2	_NLIAVLGEHDL_	1	65.1562	25052.7
3.2.220222.52329	20230926_apagotto_AP14bis_FVII_1ul_all	1	20230920_215630	230920_EC1_apagotto_AP14bis_VII_1.raw	2	17065	P08709	0.44	74	0	1.55098	11590390	12	True	True	3209.74	RVAQVIIPSTYVPGTTNHDIALLRLHQPV	0	4	_RVAQVIIPSTYVPGTTNHDIALLRLHQPV_	1	62.5588	9743.93
3.2.220222.52329	20230926_apagotto_AP14bis_FVII_1ul_all	2	20230920_233923	230920_EC1_apagotto_AP14bis_VII_2.raw	2	15312	P08709	0.399	52	0	1.55098	13504070	13	True	True	1535.8	SEPRPGVLLRAPFP	0	3	_SEPRPGVLLRAPFP_	6	57.4697	123988
3.2.220222.52329	20230926_apagotto_AP14bis_FVII_1ul_all	2	20230920_233923	230920_EC1_apagotto_AP14bis_VII_2.raw	2	15312	P08709	0.399	52	0	1.55098	13504070	13	True	True	1535.8	SEPRPGVLLRAPFP	0	2	_SEPRPGVLLRAPFP_	5	57.8165	11943100
3.2.220222.52329	20230926_apagotto_AP14bis_FVII_1ul_all	2	20230920_233923	230920_EC1_apagotto_AP14bis_VII_2.raw	2	15312	P08709	0.399	52	0	1.55098	13504070	13	True	True	1322.51	LMTQDCLQQSR	0	2	_LM[Oxidation (M)]TQDC[Carbamidomethyl (C)]LQQSR_	6	27.0507	356884
3.2.220222.52329	20230926_apagotto_AP14bis_FVII_1ul_all	2	20230920_233923	230920_EC1_apagotto_AP14bis_VII_2.raw	2	15312	P08709	0.399	52	0	1.55098	13504070	13	True	True	1322.51	LMTQDCLQQSR	0	2	_LMTQDC[Carbamidomethyl (C)]LQQSR_	6	30.1675	63790.3
3.2.220222.52329	20230926_apagotto_AP14bis_FVII_1ul_all	2	20230920_233923	230920_EC1_apagotto_AP14bis_VII_2.raw	2	15312	P08709	0.399	52	0	1.55098	13504070	13	True	True	1350.46	CHEGYSLLADGVS	0	2	_C[Carbamidomethyl (C)]HEGYSLLADGVS_	6	46.9437	802890
3.2.220222.52329	20230926_apagotto_AP14bis_FVII_1ul_all	2	20230920_233923	230920_EC1_apagotto_AP14bis_VII_2.raw	2	15312	P08709	0.399	52	0	1.55098	13504070	13	True	True	1326.51	TFSERTLAFVR	0	3	_TFSERTLAFVR_	6	47.2709	83663.4
3.2.220222.52329	20230926_apagotto_AP14bis_FVII_1ul_all	2	20230920_233923	230920_EC1_apagotto_AP14bis_VII_2.raw	2	15312	P08709	0.399	52	0	1.55098	13504070	13	True	True	2478.87	VAQVIIPSTYVPGTTNHDIALLR	0	3	_VAQVIIPSTYVPGTTNHDIALLR_	6	63.9172	63996.6
3.2.220222.52329	20230926_apagotto_AP14bis_FVII_1ul_all	2	20230920_233923	230920_EC1_apagotto_AP14bis_VII_2.raw	2	15312	P08709	0.399	52	0	1.55098	13504070	13	True	True	2478.87	VAQVIIPSTYVPGTTNHDIALLR	0	2	_VAQVIIPSTYVPGTTNHDIALLR_	5	63.9964	65749.9
3.2.220222.52329	20230926_apagotto_AP14bis_FVII_1ul_all	2	20230920_233923	230920_EC1_apagotto_AP14bis_VII_2.raw	2	15312	P08709	0.399	52	0	1.55098	13504070	13	True	True	1875.01	NCETHKDDQLICVNEN	0	3	_[DimethNter0]NC[Carbamidomethyl (C)]ETHKDDQLIC[Carbamidomethyl (C)]VNEN_	6	33.7002	61725.9
3.2.220222.52329	20230926_apagotto_AP14bis_FVII_1ul_all	2	20230920_233923	230920_EC1_apagotto_AP14bis_VII_2.raw	2	15312	P08709	0.399	52	0	1.55098	13504070	13	True	True	892.036	CLPAFEGR	0	2	_C[Carbamidomethyl (C)]LPAFEGR_	6	38.5298	60459
3.2.220222.52329	20230926_apagotto_AP14bis_FVII_1ul_all	2	20230920_233923	230920_EC1_apagotto_AP14bis_VII_2.raw	2	15312	P08709	0.399	52	0	1.55098	13504070	13	True	True	1207.35	ATVGHFGVYTR	0	3	_[DimethNter0]ATVGHFGVYTR_	6	36.7605	59044.3
3.2.220222.52329	20230926_apagotto_AP14bis_FVII_1ul_all	2	20230920_233923	230920_EC1_apagotto_AP14bis_VII_2.raw	2	15312	P08709	0.399	52	0	1.55098	13504070	13	True	True	2165.58	LHQPVVLTDHVVPLCLPER	0	4	_LHQPVVLTDHVVPLC[Carbamidomethyl (C)]LPER_	6	58.5228	59027.9
3.2.220222.52329	20230926_apagotto_AP14bis_FVII_1ul_all	2	20230920_233923	230920_EC1_apagotto_AP14bis_VII_2.raw	2	15312	P08709	0.399	52	0	1.55098	13504070	13	True	True	1566.86	LHQPVVLTDHVVPL	0	3	_LHQPVVLTDHVVPL_	6	57.1135	58852.7
3.2.220222.52329	20230926_apagotto_AP14bis_FVII_1ul_all	2	20230920_233923	230920_EC1_apagotto_AP14bis_VII_2.raw	2	15312	P08709	0.399	52	0	1.55098	13504070	13	True	True	2490.62	NLIAVLGEHDLSEHDGDEQSRR	0	4	_NLIAVLGEHDLSEHDGDEQSRR_	6	49.1701	58112.4
3.2.220222.52329	20230926_apagotto_AP14bis_FVII_1ul_all	2	20230920_233923	230920_EC1_apagotto_AP14bis_VII_2.raw	2	15312	P08709	0.399	52	0	1.55098	13504070	13	True	True	1367.54	GCATVGHFGVYTR	0	3	_[DimethNter0]GC[Carbamidomethyl (C)]ATVGHFGVYTR_	5	38.3348	55780.3
3.2.220222.52329	20230926_apagotto_AP14bis_FVII_1ul_all	2	20230920_233923	230920_EC1_apagotto_AP14bis_VII_2.raw	2	15312	P08709	0.399	52	0	1.55098	13504070	13	True	True	967.128	SEPRPGVLL	0	2	_SEPRPGVLL_	6	45.4608	53108.9
3.2.220222.52329	20230926_apagotto_AP14bis_FVII_1ul_all	2	20230920_233923	230920_EC1_apagotto_AP14bis_VII_2.raw	2	15312	P08709	0.399	52	0	1.55098	13504070	13	True	True	2635.06	RVAQVIIPSTYVPGTTNHDIALLR	0	4	_RVAQVIIPSTYVPGTTNHDIALLR_	6	59.9868	233779
3.2.220222.52329	20230926_apagotto_AP14bis_FVII_1ul_all	2	20230920_233923	230920_EC1_apagotto_AP14bis_VII_2.raw	2	15312	P08709	0.399	52	0	1.55098	13504070	13	True	True	2635.06	RVAQVIIPSTYVPGTTNHDIALLR	0	3	_RVAQVIIPSTYVPGTTNHDIALLR_	6	59.9868	25536.2
3.2.220222.52329	20230926_apagotto_AP14bis_FVII_1ul_all	2	20230920_233923	230920_EC1_apagotto_AP14bis_VII_2.raw	2	15312	P08709	0.399	52	0	1.55098	13504070	13	True	True	2635.06	RVAQVIIPSTYVPGTTNHDIALLR	0	4	_[DimethNter0]RVAQVIIPSTYVPGTTNHDIALLR_	3	60.6864	27076
3.2.220222.52329	20230926_apagotto_AP14bis_FVII_1ul_all	2	20230920_233923	230920_EC1_apagotto_AP14bis_VII_2.raw	2	15312	P08709	0.399	52	0	1.55098	13504070	13	True	True	1696.87	SCRCHEGYSLLADGVS	0	3	_SC[Carbamidomethyl (C)]RC[Carbamidomethyl (C)]HEGYSLLADGVS_	6	42.3987	49152.2
3.2.220222.52329	20230926_apagotto_AP14bis_FVII_1ul_all	2	20230920_233923	230920_EC1_apagotto_AP14bis_VII_2.raw	2	15312	P08709	0.399	52	0	1.55098	13504070	13	True	True	2334.44	NLIAVLGEHDLSEHDGDEQSR	0	3	_NLIAVLGEHDLSEHDGDEQSR_	6	51.8662	41165.8
3.2.220222.52329	20230926_apagotto_AP14bis_FVII_1ul_all	2	20230920_233923	230920_EC1_apagotto_AP14bis_VII_2.raw	2	15312	P08709	0.399	52	0	1.55098	13504070	13	True	True	1107.2	CHEGYSLLAD	0	2	_C[Carbamidomethyl (C)]HEGYSLLAD_	6	41.8758	41160.3
3.2.220222.52329	20230926_apagotto_AP14bis_FVII_1ul_all	2	20230920_233923	230920_EC1_apagotto_AP14bis_VII_2.raw	2	15312	P08709	0.399	52	0	1.55098	13504070	13	True	True	2786.24	LHQPVVLTDHVVPLCLPERTFSER	0	5	_LHQPVVLTDHVVPLC[Carbamidomethyl (C)]LPERTFSER_	6	59.3075	37737.5
3.2.220222.52329	20230926_apagotto_AP14bis_FVII_1ul_all	2	20230920_233923	230920_EC1_apagotto_AP14bis_VII_2.raw	2	15312	P08709	0.399	52	0	1.55098	13504070	13	True	True	1021.18	LHQPVVLTD	0	2	_LHQPVVLTD_	6	38.5563	32116.3
3.2.220222.52329	20230926_apagotto_AP14bis_FVII_1ul_all	2	20230920_233923	230920_EC1_apagotto_AP14bis_VII_2.raw	2	15312	P08709	0.399	52	0	1.55098	13504070	13	True	True	1123.32	SEPRPGVLLR	0	3	_[DimethNter0]SEPRPGVLLR_	5	36.1892	30823.9
3.2.220222.52329	20230926_apagotto_AP14bis_FVII_1ul_all	2	20230920_233923	230920_EC1_apagotto_AP14bis_VII_2.raw	2	15312	P08709	0.399	52	0	1.55098	13504070	13	True	True	1319.61	PRPGVLLRAPFP	0	2	_PRPGVLLRAPFP_	6	57.6808	15260.3
3.2.220222.52329	20230926_apagotto_AP14bis_FVII_1ul_all	2	20230920_233923	230920_EC1_apagotto_AP14bis_VII_2.raw	2	15312	P08709	0.399	52	0	1.55098	13504070	13	True	True	836.985	HDIALLR	0	2	_HDIALLR_	5	35.755	72141.5
3.2.220222.52329	20230926_apagotto_AP14bis_FVII_1ul_all	2	20230920_233923	230920_EC1_apagotto_AP14bis_VII_2.raw	2	15312	P08709	0.399	52	0	1.55098	13504070	13	True	True	1631.79	NCETHKDDQLICVN	0	3	_[DimethNter0]NC[Carbamidomethyl (C)]ETHKDDQLIC[Carbamidomethyl (C)]VN_	1	34.0588	70499.8
3.2.220222.52329	20230926_apagotto_AP14bis_FVII_1ul_all	2	20230920_233923	230920_EC1_apagotto_AP14bis_VII_2.raw	2	15312	P08709	0.399	52	0	1.55098	13504070	13	True	True	1136.27	TVGHFGVYTR	0	3	_[DimethNter0]TVGHFGVYTR_	5	35.4095	64234.1
3.2.220222.52329	20230926_apagotto_AP14bis_FVII_1ul_all	2	20230920_233923	230920_EC1_apagotto_AP14bis_VII_2.raw	2	15312	P08709	0.399	52	0	1.55098	13504070	13	True	True	912.138	VLLRAPFP	0	2	_[DimethNter0]VLLRAPFP_	1	59.4284	53089.5
3.2.220222.52329	20230926_apagotto_AP14bis_FVII_1ul_all	2	20230920_233923	230920_EC1_apagotto_AP14bis_VII_2.raw	2	15312	P08709	0.399	52	0	1.55098	13504070	13	True	True	1279.5	RSEPRPGVLLR	0	3	_RSEPRPGVLLR_	5	30.3997	50860.1
3.2.220222.52329	20230926_apagotto_AP14bis_FVII_1ul_all	2	20230920_233923	230920_EC1_apagotto_AP14bis_VII_2.raw	2	15312	P08709	0.399	52	0	1.55098	13504070	13	True	True	1035.17	VGHFGVYTR	0	3	_[DimethNter0]VGHFGVYTR_	5	33.2909	49588.9
3.2.220222.52329	20230926_apagotto_AP14bis_FVII_1ul_all	2	20230920_233923	230920_EC1_apagotto_AP14bis_VII_2.raw	2	15312	P08709	0.399	52	0	1.55098	13504070	13	True	True	1816.08	RVAQVIIPSTYVPGTTN	0	2	_RVAQVIIPSTYVPGTTN_	5	54.3188	46846.4
3.2.220222.52329	20230926_apagotto_AP14bis_FVII_1ul_all	2	20230920_233923	230920_EC1_apagotto_AP14bis_VII_2.raw	2	15312	P08709	0.399	52	0	1.55098	13504070	13	True	True	1659.9	VAQVIIPSTYVPGTTN	0	2	_VAQVIIPSTYVPGTTN_	5	58.5294	90462.4
3.2.220222.52329	20230926_apagotto_AP14bis_FVII_1ul_all	2	20230920_233923	230920_EC1_apagotto_AP14bis_VII_2.raw	2	15312	P08709	0.399	52	0	1.55098	13504070	13	True	True	1639.97	RGATALELMVLNVPR	0	3	_[DimethNter0]RGATALELM[Oxidation (M)]VLNVPR_	2	56.8735	21488.2
3.2.220222.52329	20230926_apagotto_AP14bis_FVII_1ul_all	2	20230920_233923	230920_EC1_apagotto_AP14bis_VII_2.raw	2	15312	P08709	0.399	52	0	1.55098	13504070	13	True	True	907.122	PRPGVLLR	0	2	_PRPGVLLR_	4	35.1847	53739.5
3.2.220222.52329	20230926_apagotto_AP14bis_FVII_1ul_all	2	20230920_233923	230920_EC1_apagotto_AP14bis_VII_2.raw	2	15312	P08709	0.399	52	0	1.55098	13504070	13	True	True	1078.16	TQDCLQQSR	0	2	_TQDC[Carbamidomethyl (C)]LQQSR_	4	16.914	48537.6
3.2.220222.52329	20230926_apagotto_AP14bis_FVII_1ul_all	2	20230920_233923	230920_EC1_apagotto_AP14bis_VII_2.raw	2	15312	P08709	0.399	52	0	1.55098	13504070	13	True	True	3498.75	NCETHKDDQLICVNENGGCEQYCSDHTGTKR	0	5	_NC[Carbamidomethyl (C)]ETHK[DimethLys0]DDQLIC[Carbamidomethyl (C)]VNENGGC[Carbamidomethyl (C)]EQYC[Carbamidomethyl (C)]SDHTGTK[DimethLys0]R_	3	32.8932	9498.28
3.2.220222.52329	20230926_apagotto_AP14bis_FVII_1ul_all	2	20230920_233923	230920_EC1_apagotto_AP14bis_VII_2.raw	2	15312	P08709	0.399	52	0	1.55098	13504070	13	True	True	1641.75	GGCEQYCSDHTGTKR	0	4	_[DimethNter0]GGC[Carbamidomethyl (C)]EQYC[Carbamidomethyl (C)]SDHTGTK[DimethLys0]R_	3	15.2288	86736.6
3.2.220222.52329	20230926_apagotto_AP14bis_FVII_1ul_all	2	20230920_233923	230920_EC1_apagotto_AP14bis_VII_2.raw	2	15312	P08709	0.399	52	0	1.55098	13504070	13	True	True	804.983	LHQPVVL	0	2	_LHQPVVL_	3	42.4261	51433.1
3.2.220222.52329	20230926_apagotto_AP14bis_FVII_1ul_all	2	20230920_233923	230920_EC1_apagotto_AP14bis_VII_2.raw	2	15312	P08709	0.399	52	0	1.55098	13504070	13	True	True	1039.21	FCLPAFEGR	0	2	_FC[Carbamidomethyl (C)]LPAFEGR_	3	57.0312	43978.1
3.2.220222.52329	20230926_apagotto_AP14bis_FVII_1ul_all	2	20230920_233923	230920_EC1_apagotto_AP14bis_VII_2.raw	2	15312	P08709	0.399	52	0	1.55098	13504070	13	True	True	2502.99	ELMVLNVPRLMTQDCLQQSRK	0	3	_[DimethNter0]ELMVLNVPRLMTQDC[Carbamidomethyl (C)]LQQSRK_	1	55.7765	141688
3.2.220222.52329	20230926_apagotto_AP14bis_FVII_1ul_all	2	20230920_233923	230920_EC1_apagotto_AP14bis_VII_2.raw	2	15312	P08709	0.399	52	0	1.55098	13504070	13	True	True	921.031	CHEGYSLL	0	2	_C[Carbamidomethyl (C)]HEGYSLL_	2	43.6215	50308.4
3.2.220222.52329	20230926_apagotto_AP14bis_FVII_1ul_all	3	20230921_012052	230920_EC1_apagotto_AP14bis_VII_3.raw	2	17421	P08709	0.421	73	0	1.55098	2061897	14	True	True	1322.51	LMTQDCLQQSR	0	2	_LM[Oxidation (M)]TQDC[Carbamidomethyl (C)]LQQSR_	6	27.1773	913712
3.2.220222.52329	20230926_apagotto_AP14bis_FVII_1ul_all	3	20230921_012052	230920_EC1_apagotto_AP14bis_VII_3.raw	2	17421	P08709	0.421	73	0	1.55098	2061897	14	True	True	1322.51	LMTQDCLQQSR	0	2	_LMTQDC[Carbamidomethyl (C)]LQQSR_	6	29.9368	55041.1
3.2.220222.52329	20230926_apagotto_AP14bis_FVII_1ul_all	3	20230921_012052	230920_EC1_apagotto_AP14bis_VII_3.raw	2	17421	P08709	0.421	73	0	1.55098	2061897	14	True	True	2635.06	RVAQVIIPSTYVPGTTNHDIALLR	0	3	_RVAQVIIPSTYVPGTTNHDIALLR_	6	59.8398	548795
3.2.220222.52329	20230926_apagotto_AP14bis_FVII_1ul_all	3	20230921_012052	230920_EC1_apagotto_AP14bis_VII_3.raw	2	17421	P08709	0.421	73	0	1.55098	2061897	14	True	True	2635.06	RVAQVIIPSTYVPGTTNHDIALLR	0	4	_RVAQVIIPSTYVPGTTNHDIALLR_	6	59.8398	108152
3.2.220222.52329	20230926_apagotto_AP14bis_FVII_1ul_all	3	20230921_012052	230920_EC1_apagotto_AP14bis_VII_3.raw	2	17421	P08709	0.421	73	0	1.55098	2061897	14	True	True	2635.06	RVAQVIIPSTYVPGTTNHDIALLR	0	4	_[DimethNter0]RVAQVIIPSTYVPGTTNHDIALLR_	3	60.494	23269.8
3.2.220222.52329	20230926_apagotto_AP14bis_FVII_1ul_all	3	20230921_012052	230920_EC1_apagotto_AP14bis_VII_3.raw	2	17421	P08709	0.421	73	0	1.55098	2061897	14	True	True	1123.32	SEPRPGVLLR	0	3	_SEPRPGVLLR_	5	34.8524	107888
3.2.220222.52329	20230926_apagotto_AP14bis_FVII_1ul_all	3	20230921_012052	230920_EC1_apagotto_AP14bis_VII_3.raw	2	17421	P08709	0.421	73	0	1.55098	2061897	14	True	True	1123.32	SEPRPGVLLR	0	3	_[DimethNter0]SEPRPGVLLR_	5	36.1979	66094.9
3.2.220222.52329	20230926_apagotto_AP14bis_FVII_1ul_all	3	20230921_012052	230920_EC1_apagotto_AP14bis_VII_3.raw	2	17421	P08709	0.421	73	0	1.55098	2061897	14	True	True	1566.86	LHQPVVLTDHVVPL	0	3	_LHQPVVLTDHVVPL_	6	56.9795	77225.4
3.2.220222.52329	20230926_apagotto_AP14bis_FVII_1ul_all	3	20230921_012052	230920_EC1_apagotto_AP14bis_VII_3.raw	2	17421	P08709	0.421	73	0	1.55098	2061897	14	True	True	1566.86	LHQPVVLTDHVVPL	0	2	_LHQPVVLTDHVVPL_	5	56.9583	55836.1
3.2.220222.52329	20230926_apagotto_AP14bis_FVII_1ul_all	3	20230921_012052	230920_EC1_apagotto_AP14bis_VII_3.raw	2	17421	P08709	0.421	73	0	1.55098	2061897	14	True	True	1319.61	PRPGVLLRAPFP	0	2	_PRPGVLLRAPFP_	6	57.5984	105882
3.2.220222.52329	20230926_apagotto_AP14bis_FVII_1ul_all	3	20230921_012052	230920_EC1_apagotto_AP14bis_VII_3.raw	2	17421	P08709	0.421	73	0	1.55098	2061897	14	True	True	967.128	SEPRPGVLL	0	2	_SEPRPGVLL_	6	45.3624	69900.3
3.2.220222.52329	20230926_apagotto_AP14bis_FVII_1ul_all	3	20230921_012052	230920_EC1_apagotto_AP14bis_VII_3.raw	2	17421	P08709	0.421	73	0	1.55098	2061897	14	True	True	1207.35	ATVGHFGVYTR	0	3	_[DimethNter0]ATVGHFGVYTR_	6	36.7161	69172.7
3.2.220222.52329	20230926_apagotto_AP14bis_FVII_1ul_all	3	20230921_012052	230920_EC1_apagotto_AP14bis_VII_3.raw	2	17421	P08709	0.421	73	0	1.55098	2061897	14	True	True	1535.8	SEPRPGVLLRAPFP	0	3	_SEPRPGVLLRAPFP_	6	57.3371	131832
3.2.220222.52329	20230926_apagotto_AP14bis_FVII_1ul_all	3	20230921_012052	230920_EC1_apagotto_AP14bis_VII_3.raw	2	17421	P08709	0.421	73	0	1.55098	2061897	14	True	True	2490.62	NLIAVLGEHDLSEHDGDEQSRR	0	4	_NLIAVLGEHDLSEHDGDEQSRR_	6	49.0777	64286.4
3.2.220222.52329	20230926_apagotto_AP14bis_FVII_1ul_all	3	20230921_012052	230920_EC1_apagotto_AP14bis_VII_3.raw	2	17421	P08709	0.421	73	0	1.55098	2061897	14	True	True	2334.44	NLIAVLGEHDLSEHDGDEQSR	0	3	_NLIAVLGEHDLSEHDGDEQSR_	6	51.7411	58417.5
3.2.220222.52329	20230926_apagotto_AP14bis_FVII_1ul_all	3	20230921_012052	230920_EC1_apagotto_AP14bis_VII_3.raw	2	17421	P08709	0.421	73	0	1.55098	2061897	14	True	True	1696.87	SCRCHEGYSLLADGVS	0	3	_SC[Carbamidomethyl (C)]RC[Carbamidomethyl (C)]HEGYSLLADGVS_	6	41.1071	179736
3.2.220222.52329	20230926_apagotto_AP14bis_FVII_1ul_all	3	20230921_012052	230920_EC1_apagotto_AP14bis_VII_3.raw	2	17421	P08709	0.421	73	0	1.55098	2061897	14	True	True	892.036	CLPAFEGR	0	2	_C[Carbamidomethyl (C)]LPAFEGR_	6	38.3681	55591.3
3.2.220222.52329	20230926_apagotto_AP14bis_FVII_1ul_all	3	20230921_012052	230920_EC1_apagotto_AP14bis_VII_3.raw	2	17421	P08709	0.421	73	0	1.55098	2061897	14	True	True	892.036	CLPAFEGR	0	2	_[DimethNter0]C[Carbamidomethyl (C)]LPAFEGR_	2	42.4728	40914.8
3.2.220222.52329	20230926_apagotto_AP14bis_FVII_1ul_all	3	20230921_012052	230920_EC1_apagotto_AP14bis_VII_3.raw	2	17421	P08709	0.421	73	0	1.55098	2061897	14	True	True	1875.01	NCETHKDDQLICVNEN	0	3	_[DimethNter0]NC[Carbamidomethyl (C)]ETHKDDQLIC[Carbamidomethyl (C)]VNEN_	6	33.7137	54964.4
3.2.220222.52329	20230926_apagotto_AP14bis_FVII_1ul_all	3	20230921_012052	230920_EC1_apagotto_AP14bis_VII_3.raw	2	17421	P08709	0.421	73	0	1.55098	2061897	14	True	True	1350.46	CHEGYSLLADGVS	0	2	_C[Carbamidomethyl (C)]HEGYSLLADGVS_	6	45.3959	1133581
3.2.220222.52329	20230926_apagotto_AP14bis_FVII_1ul_all	3	20230921_012052	230920_EC1_apagotto_AP14bis_VII_3.raw	2	17421	P08709	0.421	73	0	1.55098	2061897	14	True	True	2786.24	LHQPVVLTDHVVPLCLPERTFSER	0	5	_LHQPVVLTDHVVPLC[Carbamidomethyl (C)]LPERTFSER_	6	59.0512	48969.1
3.2.220222.52329	20230926_apagotto_AP14bis_FVII_1ul_all	3	20230921_012052	230920_EC1_apagotto_AP14bis_VII_3.raw	2	17421	P08709	0.421	73	0	1.55098	2061897	14	True	True	2786.24	LHQPVVLTDHVVPLCLPERTFSER	0	4	_LHQPVVLTDHVVPLC[Carbamidomethyl (C)]LPERTFSER_	5	58.6327	56655.2
3.2.220222.52329	20230926_apagotto_AP14bis_FVII_1ul_all	3	20230921_012052	230920_EC1_apagotto_AP14bis_VII_3.raw	2	17421	P08709	0.421	73	0	1.55098	2061897	14	True	True	2786.24	LHQPVVLTDHVVPLCLPERTFSER	0	5	_[DimethNter0]LHQPVVLTDHVVPLC[Carbamidomethyl (C)]LPERTFSER_	1	59.7869	33883.4
3.2.220222.52329	20230926_apagotto_AP14bis_FVII_1ul_all	3	20230921_012052	230920_EC1_apagotto_AP14bis_VII_3.raw	2	17421	P08709	0.421	73	0	1.55098	2061897	14	True	True	2478.87	VAQVIIPSTYVPGTTNHDIALLR	0	3	_VAQVIIPSTYVPGTTNHDIALLR_	6	63.806	48406.7
3.2.220222.52329	20230926_apagotto_AP14bis_FVII_1ul_all	3	20230921_012052	230920_EC1_apagotto_AP14bis_VII_3.raw	2	17421	P08709	0.421	73	0	1.55098	2061897	14	True	True	2478.87	VAQVIIPSTYVPGTTNHDIALLR	0	3	_[DimethNter0]VAQVIIPSTYVPGTTNHDIALLR_	5	64.8343	39847
3.2.220222.52329	20230926_apagotto_AP14bis_FVII_1ul_all	3	20230921_012052	230920_EC1_apagotto_AP14bis_VII_3.raw	2	17421	P08709	0.421	73	0	1.55098	2061897	14	True	True	1021.18	LHQPVVLTD	0	2	_LHQPVVLTD_	6	38.4214	45340.9
3.2.220222.52329	20230926_apagotto_AP14bis_FVII_1ul_all	3	20230921_012052	230920_EC1_apagotto_AP14bis_VII_3.raw	2	17421	P08709	0.421	73	0	1.55098	2061897	14	True	True	1367.54	GCATVGHFGVYTR	0	3	_[DimethNter0]GC[Carbamidomethyl (C)]ATVGHFGVYTR_	5	38.112	41785.9
3.2.220222.52329	20230926_apagotto_AP14bis_FVII_1ul_all	3	20230921_012052	230920_EC1_apagotto_AP14bis_VII_3.raw	2	17421	P08709	0.421	73	0	1.55098	2061897	14	True	True	1326.51	TFSERTLAFVR	0	3	_TFSERTLAFVR_	6	47.1074	40912.1
3.2.220222.52329	20230926_apagotto_AP14bis_FVII_1ul_all	3	20230921_012052	230920_EC1_apagotto_AP14bis_VII_3.raw	2	17421	P08709	0.421	73	0	1.55098	2061897	14	True	True	2165.58	LHQPVVLTDHVVPLCLPER	0	4	_LHQPVVLTDHVVPLC[Carbamidomethyl (C)]LPER_	6	58.2365	37860.9
3.2.220222.52329	20230926_apagotto_AP14bis_FVII_1ul_all	3	20230921_012052	230920_EC1_apagotto_AP14bis_VII_3.raw	2	17421	P08709	0.421	73	0	1.55098	2061897	14	True	True	1107.2	CHEGYSLLAD	0	2	_C[Carbamidomethyl (C)]HEGYSLLAD_	6	41.7463	68833.6
3.2.220222.52329	20230926_apagotto_AP14bis_FVII_1ul_all	3	20230921_012052	230920_EC1_apagotto_AP14bis_VII_3.raw	2	17421	P08709	0.421	73	0	1.55098	2061897	14	True	True	1035.17	VGHFGVYTR	0	3	_[DimethNter0]VGHFGVYTR_	5	33.1002	70865.3
3.2.220222.52329	20230926_apagotto_AP14bis_FVII_1ul_all	3	20230921_012052	230920_EC1_apagotto_AP14bis_VII_3.raw	2	17421	P08709	0.421	73	0	1.55098	2061897	14	True	True	1136.27	TVGHFGVYTR	0	3	_[DimethNter0]TVGHFGVYTR_	5	35.2009	57210.7
3.2.220222.52329	20230926_apagotto_AP14bis_FVII_1ul_all	3	20230921_012052	230920_EC1_apagotto_AP14bis_VII_3.raw	2	17421	P08709	0.421	73	0	1.55098	2061897	14	True	True	1631.79	NCETHKDDQLICVN	0	3	_NC[Carbamidomethyl (C)]ETHK[DimethLys0]DDQLIC[Carbamidomethyl (C)]VN_	2	34.1142	51150.6
3.2.220222.52329	20230926_apagotto_AP14bis_FVII_1ul_all	3	20230921_012052	230920_EC1_apagotto_AP14bis_VII_3.raw	2	17421	P08709	0.421	73	0	1.55098	2061897	14	True	True	1816.08	RVAQVIIPSTYVPGTTN	0	2	_RVAQVIIPSTYVPGTTN_	5	54.2529	50673.6
3.2.220222.52329	20230926_apagotto_AP14bis_FVII_1ul_all	3	20230921_012052	230920_EC1_apagotto_AP14bis_VII_3.raw	2	17421	P08709	0.421	73	0	1.55098	2061897	14	True	True	912.138	VLLRAPFP	0	2	_VLLRAPFP_	4	57.4556	46915.7
3.2.220222.52329	20230926_apagotto_AP14bis_FVII_1ul_all	3	20230921_012052	230920_EC1_apagotto_AP14bis_VII_3.raw	2	17421	P08709	0.421	73	0	1.55098	2061897	14	True	True	1639.97	RGATALELMVLNVPR	0	3	_[DimethNter0]RGATALELMVLNVPR_	3	66.6727	43241.4
3.2.220222.52329	20230926_apagotto_AP14bis_FVII_1ul_all	3	20230921_012052	230920_EC1_apagotto_AP14bis_VII_3.raw	2	17421	P08709	0.421	73	0	1.55098	2061897	14	True	True	1659.9	VAQVIIPSTYVPGTTN	0	2	_VAQVIIPSTYVPGTTN_	5	58.3934	76439.8
3.2.220222.52329	20230926_apagotto_AP14bis_FVII_1ul_all	3	20230921_012052	230920_EC1_apagotto_AP14bis_VII_3.raw	2	17421	P08709	0.421	73	0	1.55098	2061897	14	True	True	3474.08	LHQPVVLTDHVVPLCLPERTFSERTLAFVR	0	4	_LHQPVVLTDHVVPLC[Carbamidomethyl (C)]LPERTFSERTLAFVR_	4	65.5471	34246.5
3.2.220222.52329	20230926_apagotto_AP14bis_FVII_1ul_all	3	20230921_012052	230920_EC1_apagotto_AP14bis_VII_3.raw	2	17421	P08709	0.421	73	0	1.55098	2061897	14	True	True	907.122	PRPGVLLR	0	2	_PRPGVLLR_	4	34.9777	74630.1
3.2.220222.52329	20230926_apagotto_AP14bis_FVII_1ul_all	3	20230921_012052	230920_EC1_apagotto_AP14bis_VII_3.raw	2	17421	P08709	0.421	73	0	1.55098	2061897	14	True	True	1310.49	CATVGHFGVYTR	0	3	_[DimethNter0]C[Carbamidomethyl (C)]ATVGHFGVYTR_	4	38.1032	41670.2
3.2.220222.52329	20230926_apagotto_AP14bis_FVII_1ul_all	3	20230921_012052	230920_EC1_apagotto_AP14bis_VII_3.raw	2	17421	P08709	0.421	73	0	1.55098	2061897	14	True	True	1661.78	NLIAVLGEHDLSEHD	0	2	_NLIAVLGEHDLSEHD_	4	56.2638	35662.1
3.2.220222.52329	20230926_apagotto_AP14bis_FVII_1ul_all	3	20230921_012052	230920_EC1_apagotto_AP14bis_VII_3.raw	2	17421	P08709	0.421	73	0	1.55098	2061897	14	True	True	3498.75	NCETHKDDQLICVNENGGCEQYCSDHTGTKR	0	6	_NC[Carbamidomethyl (C)]ETHK[DimethLys0]DDQLIC[Carbamidomethyl (C)]VNENGGC[Carbamidomethyl (C)]EQYC[Carbamidomethyl (C)]SDHTGTK[DimethLys0]R_	1	31.8264	31270.3
3.2.220222.52329	20230926_apagotto_AP14bis_FVII_1ul_all	3	20230921_012052	230920_EC1_apagotto_AP14bis_VII_3.raw	2	17421	P08709	0.421	73	0	1.55098	2061897	14	True	True	1078.16	TQDCLQQSR	0	2	_TQDC[Carbamidomethyl (C)]LQQSR_	4	17.5854	28177.7
3.2.220222.52329	20230926_apagotto_AP14bis_FVII_1ul_all	3	20230921_012052	230920_EC1_apagotto_AP14bis_VII_3.raw	2	17421	P08709	0.421	73	0	1.55098	2061897	14	True	True	2691.01	SCRCHEGYSLLADGVSCTPTVEYPC	0	3	_SC[Carbamidomethyl (C)]RC[Carbamidomethyl (C)]HEGYSLLADGVSC[Carbamidomethyl (C)]TPTVEYPC[Carbamidomethyl (C)]_	4	53.5361	20776.3
3.2.220222.52329	20230926_apagotto_AP14bis_FVII_1ul_all	3	20230921_012052	230920_EC1_apagotto_AP14bis_VII_3.raw	2	17421	P08709	0.421	73	0	1.55098	2061897	14	True	True	951.089	NHDIALLR	0	2	_[DimethNter0]NHDIALLR_	3	36.8298	133622
3.2.220222.52329	20230926_apagotto_AP14bis_FVII_1ul_all	3	20230921_012052	230920_EC1_apagotto_AP14bis_VII_3.raw	2	17421	P08709	0.421	73	0	1.55098	2061897	14	True	True	1483.78	GATALELMVLNVPR	0	2	_GATALELM[Oxidation (M)]VLNVPR_	3	61.6541	41077.3
3.2.220222.52329	20230926_apagotto_AP14bis_FVII_1ul_all	3	20230921_012052	230920_EC1_apagotto_AP14bis_VII_3.raw	2	17421	P08709	0.421	73	0	1.55098	2061897	14	True	True	804.983	LHQPVVL	0	2	_LHQPVVL_	3	42.3471	40830.7
3.2.220222.52329	20230926_apagotto_AP14bis_FVII_1ul_all	3	20230921_012052	230920_EC1_apagotto_AP14bis_VII_3.raw	2	17421	P08709	0.421	73	0	1.55098	2061897	14	True	True	1039.21	FCLPAFEGR	0	2	_FC[Carbamidomethyl (C)]LPAFEGR_	3	56.9583	39091.5
3.2.220222.52329	20230926_apagotto_AP14bis_FVII_1ul_all	3	20230921_012052	230920_EC1_apagotto_AP14bis_VII_3.raw	2	17421	P08709	0.421	73	0	1.55098	2061897	14	True	True	1552.72	GQGCATVGHFGVYTR	0	3	_[DimethNter0]GQGC[Carbamidomethyl (C)]ATVGHFGVYTR_	2	38.2449	68193.2
3.2.220222.52329	20230926_apagotto_AP14bis_FVII_1ul_all	3	20230921_012052	230920_EC1_apagotto_AP14bis_VII_3.raw	2	17421	P08709	0.421	73	0	1.55098	2061897	14	True	True	921.031	CHEGYSLL	0	2	_C[Carbamidomethyl (C)]HEGYSLL_	2	43.4594	47935.7
3.2.220222.52329	20230926_apagotto_AP14bis_FVII_1ul_all	3	20230921_012052	230920_EC1_apagotto_AP14bis_VII_3.raw	2	17421	P08709	0.421	73	0	1.55098	2061897	14	True	True	4626.44	VAQVIIPSTYVPGTTNHDIALLRLHQPVVLTDHVVPLCLPER	0	5	_VAQVIIPSTYVPGTTNHDIALLRLHQPVVLTDHVVPLC[Carbamidomethyl (C)]LPER_	2	67.5555	46484.3
3.2.220222.52329	20230926_apagotto_AP14bis_FVII_1ul_all	3	20230921_012052	230920_EC1_apagotto_AP14bis_VII_3.raw	2	17421	P08709	0.421	73	0	1.55098	2061897	14	True	True	1670.88	TYVPGTTNHDIALLR	0	3	_[DimethNter0]TYVPGTTNHDIALLR_	1	49.3989	90139.9
3.2.220222.52329	20230926_apagotto_AP14bis_FVII_1ul_all	3	20230921_012052	230920_EC1_apagotto_AP14bis_VII_3.raw	2	17421	P08709	0.421	73	0	1.55098	2061897	14	True	True	1315.42	NCETHKDDQLI	0	3	_NC[Carbamidomethyl (C)]ETHK[DimethLys0]DDQLI_	1	29.0109	69621.8
3.2.220222.52329	20230926_apagotto_AP14bis_FVII_1ul_all	3	20230921_012052	230920_EC1_apagotto_AP14bis_VII_3.raw	2	17421	P08709	0.421	73	0	1.55098	2061897	14	True	True	1315.42	NCETHKDDQLI	0	2	_NC[Carbamidomethyl (C)]ETHK[DimethLys0]DDQLI_	1	28.9533	38315.5
3.2.220222.52329	20230926_apagotto_AP14bis_FVII_1ul_all	3	20230921_012052	230920_EC1_apagotto_AP14bis_VII_3.raw	2	17421	P08709	0.421	73	0	1.55098	2061897	14	True	True	1495.67	QGCATVGHFGVYTR	0	3	_[DimethNter0]QGC[Carbamidomethyl (C)]ATVGHFGVYTR_	1	38.145	48776.7
3.2.220222.52329	20230926_apagotto_AP14bis_FVII_1ul_all	3	20230921_012052	230920_EC1_apagotto_AP14bis_VII_3.raw	2	17421	P08709	0.421	73	0	1.55098	2061897	14	True	True	1066.31	PGVLLRAPFP	0	2	_PGVLLRAPFP_	1	62.1591	36998.3
3.2.220222.52329	20230926_apagotto_AP14bis_FVII_1ul_all	3	20230921_012052	230920_EC1_apagotto_AP14bis_VII_3.raw	2	17421	P08709	0.421	73	0	1.55098	2061897	14	True	True	1052.19	TNHDIALLR	0	3	_[DimethNter0]TNHDIALLR_	1	37.1515	35267.8
3.2.220222.52329	20230926_apagotto_AP14bis_FVII_1ul_all	3	20230921_012052	230920_EC1_apagotto_AP14bis_VII_3.raw	2	17421	P08709	0.421	73	0	1.55098	2061897	14	True	True	1142.35	CFCLPAFEGR	0	2	_C[Carbamidomethyl (C)]FC[Carbamidomethyl (C)]LPAFEGR_	1	58.0389	32684.1
3.2.220222.52329	20230926_apagotto_AP14bis_FVII_1ul_all	1	20230921_044153	230920_EC1_apagotto_AP14bis_VII_Mpro_1.raw	2	35170	P08709	0.485	134	0	1.55098	21441760	27	True	True	2635.06	RVAQVIIPSTYVPGTTNHDIALLR	0	4	_RVAQVIIPSTYVPGTTNHDIALLR_	6	59.8285	5548297
3.2.220222.52329	20230926_apagotto_AP14bis_FVII_1ul_all	1	20230921_044153	230920_EC1_apagotto_AP14bis_VII_Mpro_1.raw	2	35170	P08709	0.485	134	0	1.55098	21441760	27	True	True	2635.06	RVAQVIIPSTYVPGTTNHDIALLR	0	3	_RVAQVIIPSTYVPGTTNHDIALLR_	6	59.7293	3517224
3.2.220222.52329	20230926_apagotto_AP14bis_FVII_1ul_all	1	20230921_044153	230920_EC1_apagotto_AP14bis_VII_Mpro_1.raw	2	35170	P08709	0.485	134	0	1.55098	21441760	27	True	True	1535.8	SEPRPGVLLRAPFP	0	3	_SEPRPGVLLRAPFP_	6	57.0599	3174658
3.2.220222.52329	20230926_apagotto_AP14bis_FVII_1ul_all	1	20230921_044153	230920_EC1_apagotto_AP14bis_VII_Mpro_1.raw	2	35170	P08709	0.485	134	0	1.55098	21441760	27	True	True	1535.8	SEPRPGVLLRAPFP	0	2	_SEPRPGVLLRAPFP_	5	57.0599	2045390
3.2.220222.52329	20230926_apagotto_AP14bis_FVII_1ul_all	1	20230921_044153	230920_EC1_apagotto_AP14bis_VII_Mpro_1.raw	2	35170	P08709	0.485	134	0	1.55098	21441760	27	True	True	1535.8	SEPRPGVLLRAPFP	0	3	_[DimethNter0]SEPRPGVLLRAPFP_	3	58.1212	1339150
3.2.220222.52329	20230926_apagotto_AP14bis_FVII_1ul_all	1	20230921_044153	230920_EC1_apagotto_AP14bis_VII_Mpro_1.raw	2	35170	P08709	0.485	134	0	1.55098	21441760	27	True	True	2478.87	VAQVIIPSTYVPGTTNHDIALLR	0	3	_VAQVIIPSTYVPGTTNHDIALLR_	6	63.5457	1033063
3.2.220222.52329	20230926_apagotto_AP14bis_FVII_1ul_all	1	20230921_044153	230920_EC1_apagotto_AP14bis_VII_Mpro_1.raw	2	35170	P08709	0.485	134	0	1.55098	21441760	27	True	True	2478.87	VAQVIIPSTYVPGTTNHDIALLR	0	2	_VAQVIIPSTYVPGTTNHDIALLR_	5	63.6449	728256
3.2.220222.52329	20230926_apagotto_AP14bis_FVII_1ul_all	1	20230921_044153	230920_EC1_apagotto_AP14bis_VII_Mpro_1.raw	2	35170	P08709	0.485	134	0	1.55098	21441760	27	True	True	2478.87	VAQVIIPSTYVPGTTNHDIALLR	0	3	_[DimethNter0]VAQVIIPSTYVPGTTNHDIALLR_	5	64.8272	621654
3.2.220222.52329	20230926_apagotto_AP14bis_FVII_1ul_all	1	20230921_044153	230920_EC1_apagotto_AP14bis_VII_Mpro_1.raw	2	35170	P08709	0.485	134	0	1.55098	21441760	27	True	True	2786.24	LHQPVVLTDHVVPLCLPERTFSER	0	5	_LHQPVVLTDHVVPLC[Carbamidomethyl (C)]LPERTFSER_	6	58.8971	143283
3.2.220222.52329	20230926_apagotto_AP14bis_FVII_1ul_all	1	20230921_044153	230920_EC1_apagotto_AP14bis_VII_Mpro_1.raw	2	35170	P08709	0.485	134	0	1.55098	21441760	27	True	True	2786.24	LHQPVVLTDHVVPLCLPERTFSER	0	4	_LHQPVVLTDHVVPLC[Carbamidomethyl (C)]LPERTFSER_	5	58.6124	0
3.2.220222.52329	20230926_apagotto_AP14bis_FVII_1ul_all	1	20230921_044153	230920_EC1_apagotto_AP14bis_VII_Mpro_1.raw	2	35170	P08709	0.485	134	0	1.55098	21441760	27	True	True	2786.24	LHQPVVLTDHVVPLCLPERTFSER	0	3	_LHQPVVLTDHVVPLC[Carbamidomethyl (C)]LPERTFSER_	3	58.8472	2116349
3.2.220222.52329	20230926_apagotto_AP14bis_FVII_1ul_all	1	20230921_044153	230920_EC1_apagotto_AP14bis_VII_Mpro_1.raw	2	35170	P08709	0.485	134	0	1.55098	21441760	27	True	True	2165.58	LHQPVVLTDHVVPLCLPER	0	4	_LHQPVVLTDHVVPLC[Carbamidomethyl (C)]LPER_	6	58.1212	345076
3.2.220222.52329	20230926_apagotto_AP14bis_FVII_1ul_all	1	20230921_044153	230920_EC1_apagotto_AP14bis_VII_Mpro_1.raw	2	35170	P08709	0.485	134	0	1.55098	21441760	27	True	True	2165.58	LHQPVVLTDHVVPLCLPER	0	3	_LHQPVVLTDHVVPLC[Carbamidomethyl (C)]LPER_	3	58.1212	755759
3.2.220222.52329	20230926_apagotto_AP14bis_FVII_1ul_all	1	20230921_044153	230920_EC1_apagotto_AP14bis_VII_Mpro_1.raw	2	35170	P08709	0.485	134	0	1.55098	21441760	27	True	True	2165.58	LHQPVVLTDHVVPLCLPER	0	2	_LHQPVVLTDHVVPLC[Carbamidomethyl (C)]LPER_	3	58.2706	73598.4
3.2.220222.52329	20230926_apagotto_AP14bis_FVII_1ul_all	1	20230921_044153	230920_EC1_apagotto_AP14bis_VII_Mpro_1.raw	2	35170	P08709	0.485	134	0	1.55098	21441760	27	True	True	1696.87	SCRCHEGYSLLADGVS	0	3	_SC[Carbamidomethyl (C)]RC[Carbamidomethyl (C)]HEGYSLLADGVS_	6	40.9525	623144
3.2.220222.52329	20230926_apagotto_AP14bis_FVII_1ul_all	1	20230921_044153	230920_EC1_apagotto_AP14bis_VII_Mpro_1.raw	2	35170	P08709	0.485	134	0	1.55098	21441760	27	True	True	1696.87	SCRCHEGYSLLADGVS	0	2	_SC[Carbamidomethyl (C)]RC[Carbamidomethyl (C)]HEGYSLLADGVS_	3	42.2264	564705
3.2.220222.52329	20230926_apagotto_AP14bis_FVII_1ul_all	1	20230921_044153	230920_EC1_apagotto_AP14bis_VII_Mpro_1.raw	2	35170	P08709	0.485	134	0	1.55098	21441760	27	True	True	1326.51	TFSERTLAFVR	0	3	_TFSERTLAFVR_	6	46.8791	273971
3.2.220222.52329	20230926_apagotto_AP14bis_FVII_1ul_all	1	20230921_044153	230920_EC1_apagotto_AP14bis_VII_Mpro_1.raw	2	35170	P08709	0.485	134	0	1.55098	21441760	27	True	True	1326.51	TFSERTLAFVR	0	2	_TFSERTLAFVR_	3	46.8303	2314935
3.2.220222.52329	20230926_apagotto_AP14bis_FVII_1ul_all	1	20230921_044153	230920_EC1_apagotto_AP14bis_VII_Mpro_1.raw	2	35170	P08709	0.485	134	0	1.55098	21441760	27	True	True	1566.86	LHQPVVLTDHVVPL	0	3	_LHQPVVLTDHVVPL_	6	56.7137	295910
3.2.220222.52329	20230926_apagotto_AP14bis_FVII_1ul_all	1	20230921_044153	230920_EC1_apagotto_AP14bis_VII_Mpro_1.raw	2	35170	P08709	0.485	134	0	1.55098	21441760	27	True	True	1566.86	LHQPVVLTDHVVPL	0	2	_LHQPVVLTDHVVPL_	5	56.6651	366474
3.2.220222.52329	20230926_apagotto_AP14bis_FVII_1ul_all	1	20230921_044153	230920_EC1_apagotto_AP14bis_VII_Mpro_1.raw	2	35170	P08709	0.485	134	0	1.55098	21441760	27	True	True	2490.62	NLIAVLGEHDLSEHDGDEQSRR	0	4	_NLIAVLGEHDLSEHDGDEQSRR_	6	48.7996	359816
3.2.220222.52329	20230926_apagotto_AP14bis_FVII_1ul_all	1	20230921_044153	230920_EC1_apagotto_AP14bis_VII_Mpro_1.raw	2	35170	P08709	0.485	134	0	1.55098	21441760	27	True	True	2490.62	NLIAVLGEHDLSEHDGDEQSRR	0	3	_NLIAVLGEHDLSEHDGDEQSRR_	3	48.8495	724513
3.2.220222.52329	20230926_apagotto_AP14bis_FVII_1ul_all	1	20230921_044153	230920_EC1_apagotto_AP14bis_VII_Mpro_1.raw	2	35170	P08709	0.485	134	0	1.55098	21441760	27	True	True	892.036	CLPAFEGR	0	2	_C[Carbamidomethyl (C)]LPAFEGR_	6	38.3418	361841
3.2.220222.52329	20230926_apagotto_AP14bis_FVII_1ul_all	1	20230921_044153	230920_EC1_apagotto_AP14bis_VII_Mpro_1.raw	2	35170	P08709	0.485	134	0	1.55098	21441760	27	True	True	2334.44	NLIAVLGEHDLSEHDGDEQSR	0	3	_NLIAVLGEHDLSEHDGDEQSR_	6	51.3923	650257
3.2.220222.52329	20230926_apagotto_AP14bis_FVII_1ul_all	1	20230921_044153	230920_EC1_apagotto_AP14bis_VII_Mpro_1.raw	2	35170	P08709	0.485	134	0	1.55098	21441760	27	True	True	2334.44	NLIAVLGEHDLSEHDGDEQSR	0	2	_NLIAVLGEHDLSEHDGDEQSR_	2	51.5229	65728.9
3.2.220222.52329	20230926_apagotto_AP14bis_FVII_1ul_all	1	20230921_044153	230920_EC1_apagotto_AP14bis_VII_Mpro_1.raw	2	35170	P08709	0.485	134	0	1.55098	21441760	27	True	True	1319.61	PRPGVLLRAPFP	0	2	_PRPGVLLRAPFP_	6	57.3035	215731
3.2.220222.52329	20230926_apagotto_AP14bis_FVII_1ul_all	1	20230921_044153	230920_EC1_apagotto_AP14bis_VII_Mpro_1.raw	2	35170	P08709	0.485	134	0	1.55098	21441760	27	True	True	1123.32	SEPRPGVLLR	0	3	_SEPRPGVLLR_	5	34.7441	150093
3.2.220222.52329	20230926_apagotto_AP14bis_FVII_1ul_all	1	20230921_044153	230920_EC1_apagotto_AP14bis_VII_Mpro_1.raw	2	35170	P08709	0.485	134	0	1.55098	21441760	27	True	True	1123.32	SEPRPGVLLR	0	3	_[DimethNter0]SEPRPGVLLR_	5	36.0505	62359.3
3.2.220222.52329	20230926_apagotto_AP14bis_FVII_1ul_all	1	20230921_044153	230920_EC1_apagotto_AP14bis_VII_Mpro_1.raw	2	35170	P08709	0.485	134	0	1.55098	21441760	27	True	True	1107.2	CHEGYSLLAD	0	2	_C[Carbamidomethyl (C)]HEGYSLLAD_	6	41.655	201758
3.2.220222.52329	20230926_apagotto_AP14bis_FVII_1ul_all	1	20230921_044153	230920_EC1_apagotto_AP14bis_VII_Mpro_1.raw	2	35170	P08709	0.485	134	0	1.55098	21441760	27	True	True	1875.01	NCETHKDDQLICVNEN	0	3	_[DimethNter0]NC[Carbamidomethyl (C)]ETHKDDQLIC[Carbamidomethyl (C)]VNEN_	6	33.5024	400882
3.2.220222.52329	20230926_apagotto_AP14bis_FVII_1ul_all	1	20230921_044153	230920_EC1_apagotto_AP14bis_VII_Mpro_1.raw	2	35170	P08709	0.485	134	0	1.55098	21441760	27	True	True	1875.01	NCETHKDDQLICVNEN	0	2	_[DimethNter0]NC[Carbamidomethyl (C)]ETHKDDQLIC[Carbamidomethyl (C)]VNEN_	1	33.5331	93980.1
3.2.220222.52329	20230926_apagotto_AP14bis_FVII_1ul_all	1	20230921_044153	230920_EC1_apagotto_AP14bis_VII_Mpro_1.raw	2	35170	P08709	0.485	134	0	1.55098	21441760	27	True	True	1322.51	LMTQDCLQQSR	0	2	_LMTQDC[Carbamidomethyl (C)]LQQSR_	6	30.063	199438
3.2.220222.52329	20230926_apagotto_AP14bis_FVII_1ul_all	1	20230921_044153	230920_EC1_apagotto_AP14bis_VII_Mpro_1.raw	2	35170	P08709	0.485	134	0	1.55098	21441760	27	True	True	1322.51	LMTQDCLQQSR	0	2	_LM[Oxidation (M)]TQDC[Carbamidomethyl (C)]LQQSR_	6	25.272	563770
3.2.220222.52329	20230926_apagotto_AP14bis_FVII_1ul_all	1	20230921_044153	230920_EC1_apagotto_AP14bis_VII_Mpro_1.raw	2	35170	P08709	0.485	134	0	1.55098	21441760	27	True	True	1322.51	LMTQDCLQQSR	0	2	_[DimethNter0]LMTQDC[Carbamidomethyl (C)]LQQSR_	1	31.4481	96661.3
3.2.220222.52329	20230926_apagotto_AP14bis_FVII_1ul_all	1	20230921_044153	230920_EC1_apagotto_AP14bis_VII_Mpro_1.raw	2	35170	P08709	0.485	134	0	1.55098	21441760	27	True	True	1367.54	GCATVGHFGVYTR	0	3	_[DimethNter0]GC[Carbamidomethyl (C)]ATVGHFGVYTR_	5	38.0561	70220.8
3.2.220222.52329	20230926_apagotto_AP14bis_FVII_1ul_all	1	20230921_044153	230920_EC1_apagotto_AP14bis_VII_Mpro_1.raw	2	35170	P08709	0.485	134	0	1.55098	21441760	27	True	True	1367.54	GCATVGHFGVYTR	0	2	_[DimethNter0]GC[Carbamidomethyl (C)]ATVGHFGVYTR_	2	38.0867	84803.4
3.2.220222.52329	20230926_apagotto_AP14bis_FVII_1ul_all	1	20230921_044153	230920_EC1_apagotto_AP14bis_VII_Mpro_1.raw	2	35170	P08709	0.485	134	0	1.55098	21441760	27	True	True	1021.18	LHQPVVLTD	0	2	_LHQPVVLTD_	6	38.3418	61172.3
3.2.220222.52329	20230926_apagotto_AP14bis_FVII_1ul_all	1	20230921_044153	230920_EC1_apagotto_AP14bis_VII_Mpro_1.raw	2	35170	P08709	0.485	134	0	1.55098	21441760	27	True	True	967.128	SEPRPGVLL	0	2	_SEPRPGVLL_	6	44.9792	58738.4
3.2.220222.52329	20230926_apagotto_AP14bis_FVII_1ul_all	1	20230921_044153	230920_EC1_apagotto_AP14bis_VII_Mpro_1.raw	2	35170	P08709	0.485	134	0	1.55098	21441760	27	True	True	1350.46	CHEGYSLLADGVS	0	2	_C[Carbamidomethyl (C)]HEGYSLLADGVS_	6	45.1883	1682289
3.2.220222.52329	20230926_apagotto_AP14bis_FVII_1ul_all	1	20230921_044153	230920_EC1_apagotto_AP14bis_VII_Mpro_1.raw	2	35170	P08709	0.485	134	0	1.55098	21441760	27	True	True	1207.35	ATVGHFGVYTR	0	3	_[DimethNter0]ATVGHFGVYTR_	6	36.5767	41774.3
3.2.220222.52329	20230926_apagotto_AP14bis_FVII_1ul_all	1	20230921_044153	230920_EC1_apagotto_AP14bis_VII_Mpro_1.raw	2	35170	P08709	0.485	134	0	1.55098	21441760	27	True	True	1816.08	RVAQVIIPSTYVPGTTN	0	2	_RVAQVIIPSTYVPGTTN_	5	54.1474	859212
3.2.220222.52329	20230926_apagotto_AP14bis_FVII_1ul_all	1	20230921_044153	230920_EC1_apagotto_AP14bis_VII_Mpro_1.raw	2	35170	P08709	0.485	134	0	1.55098	21441760	27	True	True	1631.79	NCETHKDDQLICVN	0	2	_NC[Carbamidomethyl (C)]ETHK[DimethLys0]DDQLIC[Carbamidomethyl (C)]VN_	3	34.0305	193089
3.2.220222.52329	20230926_apagotto_AP14bis_FVII_1ul_all	1	20230921_044153	230920_EC1_apagotto_AP14bis_VII_Mpro_1.raw	2	35170	P08709	0.485	134	0	1.55098	21441760	27	True	True	3474.08	LHQPVVLTDHVVPLCLPERTFSERTLAFVR	0	5	_LHQPVVLTDHVVPLC[Carbamidomethyl (C)]LPERTFSERTLAFVR_	3	65.3671	354592
3.2.220222.52329	20230926_apagotto_AP14bis_FVII_1ul_all	1	20230921_044153	230920_EC1_apagotto_AP14bis_VII_Mpro_1.raw	2	35170	P08709	0.485	134	0	1.55098	21441760	27	True	True	912.138	VLLRAPFP	0	2	_VLLRAPFP_	4	57.3035	113923
3.2.220222.52329	20230926_apagotto_AP14bis_FVII_1ul_all	1	20230921_044153	230920_EC1_apagotto_AP14bis_VII_Mpro_1.raw	2	35170	P08709	0.485	134	0	1.55098	21441760	27	True	True	836.985	HDIALLR	0	2	_HDIALLR_	5	35.5508	676552
3.2.220222.52329	20230926_apagotto_AP14bis_FVII_1ul_all	1	20230921_044153	230920_EC1_apagotto_AP14bis_VII_Mpro_1.raw	2	35170	P08709	0.485	134	0	1.55098	21441760	27	True	True	1659.9	VAQVIIPSTYVPGTTN	0	2	_VAQVIIPSTYVPGTTN_	5	58.3629	112547
3.2.220222.52329	20230926_apagotto_AP14bis_FVII_1ul_all	1	20230921_044153	230920_EC1_apagotto_AP14bis_VII_Mpro_1.raw	2	35170	P08709	0.485	134	0	1.55098	21441760	27	True	True	1136.27	TVGHFGVYTR	0	3	_[DimethNter0]TVGHFGVYTR_	5	35.0609	84908.6
3.2.220222.52329	20230926_apagotto_AP14bis_FVII_1ul_all	1	20230921_044153	230920_EC1_apagotto_AP14bis_VII_Mpro_1.raw	2	35170	P08709	0.485	134	0	1.55098	21441760	27	True	True	1136.27	TVGHFGVYTR	0	2	_[DimethNter0]TVGHFGVYTR_	1	35.0722	60112.9
3.2.220222.52329	20230926_apagotto_AP14bis_FVII_1ul_all	1	20230921_044153	230920_EC1_apagotto_AP14bis_VII_Mpro_1.raw	2	35170	P08709	0.485	134	0	1.55098	21441760	27	True	True	1136.27	TVGHFGVYTR	0	2	_TVGHFGVYTR_	1	33.1769	0
3.2.220222.52329	20230926_apagotto_AP14bis_FVII_1ul_all	1	20230921_044153	230920_EC1_apagotto_AP14bis_VII_Mpro_1.raw	2	35170	P08709	0.485	134	0	1.55098	21441760	27	True	True	1035.17	VGHFGVYTR	0	3	_[DimethNter0]VGHFGVYTR_	5	32.939	76798.9
3.2.220222.52329	20230926_apagotto_AP14bis_FVII_1ul_all	1	20230921_044153	230920_EC1_apagotto_AP14bis_VII_Mpro_1.raw	2	35170	P08709	0.485	134	0	1.55098	21441760	27	True	True	1279.5	RSEPRPGVLLR	0	3	_RSEPRPGVLLR_	5	30.3023	40299
3.2.220222.52329	20230926_apagotto_AP14bis_FVII_1ul_all	1	20230921_044153	230920_EC1_apagotto_AP14bis_VII_Mpro_1.raw	2	35170	P08709	0.485	134	0	1.55098	21441760	27	True	True	1639.97	RGATALELMVLNVPR	0	3	_[DimethNter0]RGATALELMVLNVPR_	3	66.4163	37434.4
3.2.220222.52329	20230926_apagotto_AP14bis_FVII_1ul_all	1	20230921_044153	230920_EC1_apagotto_AP14bis_VII_Mpro_1.raw	2	35170	P08709	0.485	134	0	1.55098	21441760	27	True	True	3379.9	CHEGYSLLADGVSCTPTVEYPCGKIPILEKR	0	3	_C[Carbamidomethyl (C)]HEGYSLLADGVSC[Carbamidomethyl (C)]TPTVEYPC[Carbamidomethyl (C)]GK[DimethLys0]IPILEK[DimethLys0]R_	3	59.8781	595303
3.2.220222.52329	20230926_apagotto_AP14bis_FVII_1ul_all	1	20230921_044153	230920_EC1_apagotto_AP14bis_VII_Mpro_1.raw	2	35170	P08709	0.485	134	0	1.55098	21441760	27	True	True	3379.9	CHEGYSLLADGVSCTPTVEYPCGKIPILEKR	0	4	_C[Carbamidomethyl (C)]HEGYSLLADGVSC[Carbamidomethyl (C)]TPTVEYPC[Carbamidomethyl (C)]GK[DimethLys0]IPILEK[DimethLys0]R_	3	59.3341	55011.2
3.2.220222.52329	20230926_apagotto_AP14bis_FVII_1ul_all	1	20230921_044153	230920_EC1_apagotto_AP14bis_VII_Mpro_1.raw	2	35170	P08709	0.485	134	0	1.55098	21441760	27	True	True	3379.9	CHEGYSLLADGVSCTPTVEYPCGKIPILEKR	0	5	_C[Carbamidomethyl (C)]HEGYSLLADGVSC[Carbamidomethyl (C)]TPTVEYPC[Carbamidomethyl (C)]GK[DimethLys0]IPILEK[DimethLys0]R_	2	59.384	54378.9
3.2.220222.52329	20230926_apagotto_AP14bis_FVII_1ul_all	1	20230921_044153	230920_EC1_apagotto_AP14bis_VII_Mpro_1.raw	2	35170	P08709	0.485	134	0	1.55098	21441760	27	True	True	2691.01	SCRCHEGYSLLADGVSCTPTVEYPC	0	3	_SC[Carbamidomethyl (C)]RC[Carbamidomethyl (C)]HEGYSLLADGVSC[Carbamidomethyl (C)]TPTVEYPC[Carbamidomethyl (C)]_	4	53.3323	406940
3.2.220222.52329	20230926_apagotto_AP14bis_FVII_1ul_all	1	20230921_044153	230920_EC1_apagotto_AP14bis_VII_Mpro_1.raw	2	35170	P08709	0.485	134	0	1.55098	21441760	27	True	True	3307.71	GDEQSRRVAQVIIPSTYVPGTTNHDIALLR	0	4	_[DimethNter0]GDEQSRRVAQVIIPSTYVPGTTNHDIALLR_	4	58.7482	248700
3.2.220222.52329	20230926_apagotto_AP14bis_FVII_1ul_all	1	20230921_044153	230920_EC1_apagotto_AP14bis_VII_Mpro_1.raw	2	35170	P08709	0.485	134	0	1.55098	21441760	27	True	True	2344.61	CHEGYSLLADGVSCTPTVEYPC	0	2	_C[Carbamidomethyl (C)]HEGYSLLADGVSC[Carbamidomethyl (C)]TPTVEYPC[Carbamidomethyl (C)]_	4	56.9131	217461
3.2.220222.52329	20230926_apagotto_AP14bis_FVII_1ul_all	1	20230921_044153	230920_EC1_apagotto_AP14bis_VII_Mpro_1.raw	2	35170	P08709	0.485	134	0	1.55098	21441760	27	True	True	1661.78	NLIAVLGEHDLSEHD	0	2	_NLIAVLGEHDLSEHD_	4	55.9632	114509
3.2.220222.52329	20230926_apagotto_AP14bis_FVII_1ul_all	1	20230921_044153	230920_EC1_apagotto_AP14bis_VII_Mpro_1.raw	2	35170	P08709	0.485	134	0	1.55098	21441760	27	True	True	907.122	PRPGVLLR	0	2	_PRPGVLLR_	4	34.8447	110531
3.2.220222.52329	20230926_apagotto_AP14bis_FVII_1ul_all	1	20230921_044153	230920_EC1_apagotto_AP14bis_VII_Mpro_1.raw	2	35170	P08709	0.485	134	0	1.55098	21441760	27	True	True	1078.16	TQDCLQQSR	0	2	_TQDC[Carbamidomethyl (C)]LQQSR_	4	18.1438	55452.7
3.2.220222.52329	20230926_apagotto_AP14bis_FVII_1ul_all	1	20230921_044153	230920_EC1_apagotto_AP14bis_VII_Mpro_1.raw	2	35170	P08709	0.485	134	0	1.55098	21441760	27	True	True	1310.49	CATVGHFGVYTR	0	3	_[DimethNter0]C[Carbamidomethyl (C)]ATVGHFGVYTR_	4	37.9442	53349.8
3.2.220222.52329	20230926_apagotto_AP14bis_FVII_1ul_all	1	20230921_044153	230920_EC1_apagotto_AP14bis_VII_Mpro_1.raw	2	35170	P08709	0.485	134	0	1.55098	21441760	27	True	True	2309.81	IVGGKVCPKGECPWQVLLLVNG	0	3	_[DimethNter0]IVGGKVC[Carbamidomethyl (C)]PK[DimethLys0]GEC[Carbamidomethyl (C)]PWQVLLLVNG_	1	63.5457	886721
3.2.220222.52329	20230926_apagotto_AP14bis_FVII_1ul_all	1	20230921_044153	230920_EC1_apagotto_AP14bis_VII_Mpro_1.raw	2	35170	P08709	0.485	134	0	1.55098	21441760	27	True	True	813.006	LLRAPFP	0	2	_[DimethNter0]LLRAPFP_	3	52.6412	3723498
3.2.220222.52329	20230926_apagotto_AP14bis_FVII_1ul_all	1	20230921_044153	230920_EC1_apagotto_AP14bis_VII_Mpro_1.raw	2	35170	P08709	0.485	134	0	1.55098	21441760	27	True	True	4951.48	NLIAVLGEHDLSEHDGDEQSRRVAQVIIPSTYVPGTTNHDIALLR	0	5	_NLIAVLGEHDLSEHDGDEQSRRVAQVIIPSTYVPGTTNHDIALLR_	3	65.6653	410890
3.2.220222.52329	20230926_apagotto_AP14bis_FVII_1ul_all	1	20230921_044153	230920_EC1_apagotto_AP14bis_VII_Mpro_1.raw	2	35170	P08709	0.485	134	0	1.55098	21441760	27	True	True	4951.48	NLIAVLGEHDLSEHDGDEQSRRVAQVIIPSTYVPGTTNHDIALLR	0	6	_NLIAVLGEHDLSEHDGDEQSRRVAQVIIPSTYVPGTTNHDIALLR_	3	65.6653	234917
3.2.220222.52329	20230926_apagotto_AP14bis_FVII_1ul_all	1	20230921_044153	230920_EC1_apagotto_AP14bis_VII_Mpro_1.raw	2	35170	P08709	0.485	134	0	1.55098	21441760	27	True	True	1453.6	SCRCHEGYSLLAD	0	2	_SC[Carbamidomethyl (C)]RC[Carbamidomethyl (C)]HEGYSLLAD_	3	37.0628	194863
3.2.220222.52329	20230926_apagotto_AP14bis_FVII_1ul_all	1	20230921_044153	230920_EC1_apagotto_AP14bis_VII_Mpro_1.raw	2	35170	P08709	0.485	134	0	1.55098	21441760	27	True	True	1453.6	SCRCHEGYSLLAD	0	3	_SC[Carbamidomethyl (C)]RC[Carbamidomethyl (C)]HEGYSLLAD_	2	37.1328	0
3.2.220222.52329	20230926_apagotto_AP14bis_FVII_1ul_all	1	20230921_044153	230920_EC1_apagotto_AP14bis_VII_Mpro_1.raw	2	35170	P08709	0.485	134	0	1.55098	21441760	27	True	True	1483.78	GATALELMVLNVPR	0	2	_GATALELM[Oxidation (M)]VLNVPR_	3	61.7157	84223
3.2.220222.52329	20230926_apagotto_AP14bis_FVII_1ul_all	1	20230921_044153	230920_EC1_apagotto_AP14bis_VII_Mpro_1.raw	2	35170	P08709	0.485	134	0	1.55098	21441760	27	True	True	951.089	NHDIALLR	0	2	_[DimethNter0]NHDIALLR_	3	36.6958	38614.9
3.2.220222.52329	20230926_apagotto_AP14bis_FVII_1ul_all	1	20230921_044153	230920_EC1_apagotto_AP14bis_VII_Mpro_1.raw	2	35170	P08709	0.485	134	0	1.55098	21441760	27	True	True	740.81	SEPRPGV	0	2	_SEPRPGV_	3	20.5252	38009.8
3.2.220222.52329	20230926_apagotto_AP14bis_FVII_1ul_all	1	20230921_044153	230920_EC1_apagotto_AP14bis_VII_Mpro_1.raw	2	35170	P08709	0.485	134	0	1.55098	21441760	27	True	True	940.105	TLAFVRFS	0	2	_TLAFVRFS_	2	50.4356	283616
3.2.220222.52329	20230926_apagotto_AP14bis_FVII_1ul_all	1	20230921_044153	230920_EC1_apagotto_AP14bis_VII_Mpro_1.raw	2	35170	P08709	0.485	134	0	1.55098	21441760	27	True	True	2512.67	NCETHKDDQLICVNENGGCEQY	0	3	_NC[Carbamidomethyl (C)]ETHK[DimethLys0]DDQLIC[Carbamidomethyl (C)]VNENGGC[Carbamidomethyl (C)]EQY_	2	38.1981	496092
3.2.220222.52329	20230926_apagotto_AP14bis_FVII_1ul_all	1	20230921_044153	230920_EC1_apagotto_AP14bis_VII_Mpro_1.raw	2	35170	P08709	0.485	134	0	1.55098	21441760	27	True	True	1989.11	NCETHKDDQLICVNENGG	0	3	_NC[Carbamidomethyl (C)]ETHK[DimethLys0]DDQLIC[Carbamidomethyl (C)]VNENGG_	2	33.2325	183043
3.2.220222.52329	20230926_apagotto_AP14bis_FVII_1ul_all	1	20230921_044153	230920_EC1_apagotto_AP14bis_VII_Mpro_1.raw	2	35170	P08709	0.485	134	0	1.55098	21441760	27	True	True	1988.15	GGCEQYCSDHTGTKRSCR	0	4	_[DimethNter0]GGC[Carbamidomethyl (C)]EQYC[Carbamidomethyl (C)]SDHTGTK[DimethLys0]RSC[Carbamidomethyl (C)]R_	2	15.3379	110380
3.2.220222.52329	20230926_apagotto_AP14bis_FVII_1ul_all	1	20230921_044153	230920_EC1_apagotto_AP14bis_VII_Mpro_1.raw	2	35170	P08709	0.485	134	0	1.55098	21441760	27	True	True	1988.15	GGCEQYCSDHTGTKRSCR	0	5	_[DimethNter0]GGC[Carbamidomethyl (C)]EQYC[Carbamidomethyl (C)]SDHTGTK[DimethLys0]RSC[Carbamidomethyl (C)]R_	2	15.3888	44753.6
3.2.220222.52329	20230926_apagotto_AP14bis_FVII_1ul_all	1	20230921_044153	230920_EC1_apagotto_AP14bis_VII_Mpro_1.raw	2	35170	P08709	0.485	134	0	1.55098	21441760	27	True	True	4132.51	NLIAVLGEHDLSEHDGDEQSRRVAQVIIPSTYVPGTTN	0	4	_NLIAVLGEHDLSEHDGDEQSRRVAQVIIPSTYVPGTTN_	2	63.8918	90074.7
3.2.220222.52329	20230926_apagotto_AP14bis_FVII_1ul_all	1	20230921_044153	230920_EC1_apagotto_AP14bis_VII_Mpro_1.raw	2	35170	P08709	0.485	134	0	1.55098	21441760	27	True	True	5247.1	VAQVIIPSTYVPGTTNHDIALLRLHQPVVLTDHVVPLCLPERTFSER	0	5	_VAQVIIPSTYVPGTTNHDIALLRLHQPVVLTDHVVPLC[Carbamidomethyl (C)]LPERTFSER_	2	67.5174	0
3.2.220222.52329	20230926_apagotto_AP14bis_FVII_1ul_all	1	20230921_044153	230920_EC1_apagotto_AP14bis_VII_Mpro_1.raw	2	35170	P08709	0.485	134	0	1.55098	21441760	27	True	True	5247.1	VAQVIIPSTYVPGTTNHDIALLRLHQPVVLTDHVVPLCLPERTFSER	0	6	_VAQVIIPSTYVPGTTNHDIALLRLHQPVVLTDHVVPLC[Carbamidomethyl (C)]LPERTFSER_	1	67.5174	0
3.2.220222.52329	20230926_apagotto_AP14bis_FVII_1ul_all	1	20230921_044153	230920_EC1_apagotto_AP14bis_VII_Mpro_1.raw	2	35170	P08709	0.485	134	0	1.55098	21441760	27	True	True	936.033	GHFGVYTR	0	2	_[DimethNter0]GHFGVYTR_	1	28.213	142221
3.2.220222.52329	20230926_apagotto_AP14bis_FVII_1ul_all	1	20230921_044153	230920_EC1_apagotto_AP14bis_VII_Mpro_1.raw	2	35170	P08709	0.485	134	0	1.55098	21441760	27	True	True	3135.57	EQSRRVAQVIIPSTYVPGTTNHDIALLR	0	4	_[DimethNter0]EQSRRVAQVIIPSTYVPGTTNHDIALLR_	1	57.4802	134865
3.2.220222.52329	20230926_apagotto_AP14bis_FVII_1ul_all	1	20230921_044153	230920_EC1_apagotto_AP14bis_VII_Mpro_1.raw	2	35170	P08709	0.485	134	0	1.55098	21441760	27	True	True	2241.47	CHEGYSLLADGVSCTPTVEYP	0	2	_C[Carbamidomethyl (C)]HEGYSLLADGVSC[Carbamidomethyl (C)]TPTVEYP_	1	58.8971	70718.8
3.2.220222.52329	20230926_apagotto_AP14bis_FVII_1ul_all	1	20230921_044153	230920_EC1_apagotto_AP14bis_VII_Mpro_1.raw	2	35170	P08709	0.485	134	0	1.55098	21441760	27	True	True	1609.79	SCRCHEGYSLLADGV	0	3	_SC[Carbamidomethyl (C)]RC[Carbamidomethyl (C)]HEGYSLLADGV_	1	45.5925	47319.8
3.2.220222.52329	20230926_apagotto_AP14bis_FVII_1ul_all	2	20230921_062328	230920_EC1_apagotto_AP14bis_VII_Mpro_2.raw	2	35612	P08709	0.483	120	0	1.55098	17197830	19	True	True	1123.32	SEPRPGVLLR	0	3	_SEPRPGVLLR_	5	34.5715	138648
3.2.220222.52329	20230926_apagotto_AP14bis_FVII_1ul_all	2	20230921_062328	230920_EC1_apagotto_AP14bis_VII_Mpro_2.raw	2	35612	P08709	0.483	120	0	1.55098	17197830	19	True	True	1123.32	SEPRPGVLLR	0	3	_[DimethNter0]SEPRPGVLLR_	5	35.9348	71509.4
3.2.220222.52329	20230926_apagotto_AP14bis_FVII_1ul_all	2	20230921_062328	230920_EC1_apagotto_AP14bis_VII_Mpro_2.raw	2	35612	P08709	0.483	120	0	1.55098	17197830	19	True	True	1123.32	SEPRPGVLLR	0	2	_SEPRPGVLLR_	2	34.8522	2812402
3.2.220222.52329	20230926_apagotto_AP14bis_FVII_1ul_all	2	20230921_062328	230920_EC1_apagotto_AP14bis_VII_Mpro_2.raw	2	35612	P08709	0.483	120	0	1.55098	17197830	19	True	True	2478.87	VAQVIIPSTYVPGTTNHDIALLR	0	3	_VAQVIIPSTYVPGTTNHDIALLR_	6	63.424	5113785
3.2.220222.52329	20230926_apagotto_AP14bis_FVII_1ul_all	2	20230921_062328	230920_EC1_apagotto_AP14bis_VII_Mpro_2.raw	2	35612	P08709	0.483	120	0	1.55098	17197830	19	True	True	2478.87	VAQVIIPSTYVPGTTNHDIALLR	0	2	_VAQVIIPSTYVPGTTNHDIALLR_	5	63.4738	610240
3.2.220222.52329	20230926_apagotto_AP14bis_FVII_1ul_all	2	20230921_062328	230920_EC1_apagotto_AP14bis_VII_Mpro_2.raw	2	35612	P08709	0.483	120	0	1.55098	17197830	19	True	True	2478.87	VAQVIIPSTYVPGTTNHDIALLR	0	3	_[DimethNter0]VAQVIIPSTYVPGTTNHDIALLR_	5	64.686	145762
3.2.220222.52329	20230926_apagotto_AP14bis_FVII_1ul_all	2	20230921_062328	230920_EC1_apagotto_AP14bis_VII_Mpro_2.raw	2	35612	P08709	0.483	120	0	1.55098	17197830	19	True	True	2635.06	RVAQVIIPSTYVPGTTNHDIALLR	0	4	_RVAQVIIPSTYVPGTTNHDIALLR_	6	59.6826	1340325
3.2.220222.52329	20230926_apagotto_AP14bis_FVII_1ul_all	2	20230921_062328	230920_EC1_apagotto_AP14bis_VII_Mpro_2.raw	2	35612	P08709	0.483	120	0	1.55098	17197830	19	True	True	2635.06	RVAQVIIPSTYVPGTTNHDIALLR	0	3	_RVAQVIIPSTYVPGTTNHDIALLR_	6	59.6826	2267184
3.2.220222.52329	20230926_apagotto_AP14bis_FVII_1ul_all	2	20230921_062328	230920_EC1_apagotto_AP14bis_VII_Mpro_2.raw	2	35612	P08709	0.483	120	0	1.55098	17197830	19	True	True	1696.87	SCRCHEGYSLLADGVS	0	3	_SC[Carbamidomethyl (C)]RC[Carbamidomethyl (C)]HEGYSLLADGVS_	6	40.9408	3049336
3.2.220222.52329	20230926_apagotto_AP14bis_FVII_1ul_all	2	20230921_062328	230920_EC1_apagotto_AP14bis_VII_Mpro_2.raw	2	35612	P08709	0.483	120	0	1.55098	17197830	19	True	True	1696.87	SCRCHEGYSLLADGVS	0	2	_SC[Carbamidomethyl (C)]RC[Carbamidomethyl (C)]HEGYSLLADGVS_	3	42.1012	734827
3.2.220222.52329	20230926_apagotto_AP14bis_FVII_1ul_all	2	20230921_062328	230920_EC1_apagotto_AP14bis_VII_Mpro_2.raw	2	35612	P08709	0.483	120	0	1.55098	17197830	19	True	True	2490.62	NLIAVLGEHDLSEHDGDEQSRR	0	4	_NLIAVLGEHDLSEHDGDEQSRR_	6	48.6843	694546
3.2.220222.52329	20230926_apagotto_AP14bis_FVII_1ul_all	2	20230921_062328	230920_EC1_apagotto_AP14bis_VII_Mpro_2.raw	2	35612	P08709	0.483	120	0	1.55098	17197830	19	True	True	2490.62	NLIAVLGEHDLSEHDGDEQSRR	0	3	_NLIAVLGEHDLSEHDGDEQSRR_	3	48.6843	219271
3.2.220222.52329	20230926_apagotto_AP14bis_FVII_1ul_all	2	20230921_062328	230920_EC1_apagotto_AP14bis_VII_Mpro_2.raw	2	35612	P08709	0.483	120	0	1.55098	17197830	19	True	True	2786.24	LHQPVVLTDHVVPLCLPERTFSER	0	5	_LHQPVVLTDHVVPLC[Carbamidomethyl (C)]LPERTFSER_	6	58.737	180320
3.2.220222.52329	20230926_apagotto_AP14bis_FVII_1ul_all	2	20230921_062328	230920_EC1_apagotto_AP14bis_VII_Mpro_2.raw	2	35612	P08709	0.483	120	0	1.55098	17197830	19	True	True	2786.24	LHQPVVLTDHVVPLCLPERTFSER	0	4	_LHQPVVLTDHVVPLC[Carbamidomethyl (C)]LPERTFSER_	5	59.0362	54546.5
3.2.220222.52329	20230926_apagotto_AP14bis_FVII_1ul_all	2	20230921_062328	230920_EC1_apagotto_AP14bis_VII_Mpro_2.raw	2	35612	P08709	0.483	120	0	1.55098	17197830	19	True	True	2786.24	LHQPVVLTDHVVPLCLPERTFSER	0	3	_LHQPVVLTDHVVPLC[Carbamidomethyl (C)]LPERTFSER_	3	58.6875	1621621
3.2.220222.52329	20230926_apagotto_AP14bis_FVII_1ul_all	2	20230921_062328	230920_EC1_apagotto_AP14bis_VII_Mpro_2.raw	2	35612	P08709	0.483	120	0	1.55098	17197830	19	True	True	1535.8	SEPRPGVLLRAPFP	0	3	_SEPRPGVLLRAPFP_	6	57.935	5542528
3.2.220222.52329	20230926_apagotto_AP14bis_FVII_1ul_all	2	20230921_062328	230920_EC1_apagotto_AP14bis_VII_Mpro_2.raw	2	35612	P08709	0.483	120	0	1.55098	17197830	19	True	True	1535.8	SEPRPGVLLRAPFP	0	2	_SEPRPGVLLRAPFP_	5	56.868	29561080
3.2.220222.52329	20230926_apagotto_AP14bis_FVII_1ul_all	2	20230921_062328	230920_EC1_apagotto_AP14bis_VII_Mpro_2.raw	2	35612	P08709	0.483	120	0	1.55098	17197830	19	True	True	1535.8	SEPRPGVLLRAPFP	0	3	_[DimethNter0]SEPRPGVLLRAPFP_	3	57.8362	1123484
3.2.220222.52329	20230926_apagotto_AP14bis_FVII_1ul_all	2	20230921_062328	230920_EC1_apagotto_AP14bis_VII_Mpro_2.raw	2	35612	P08709	0.483	120	0	1.55098	17197830	19	True	True	1326.51	TFSERTLAFVR	0	3	_TFSERTLAFVR_	6	46.8444	690621
3.2.220222.52329	20230926_apagotto_AP14bis_FVII_1ul_all	2	20230921_062328	230920_EC1_apagotto_AP14bis_VII_Mpro_2.raw	2	35612	P08709	0.483	120	0	1.55098	17197830	19	True	True	1326.51	TFSERTLAFVR	0	2	_TFSERTLAFVR_	3	46.7948	3296364
3.2.220222.52329	20230926_apagotto_AP14bis_FVII_1ul_all	2	20230921_062328	230920_EC1_apagotto_AP14bis_VII_Mpro_2.raw	2	35612	P08709	0.483	120	0	1.55098	17197830	19	True	True	2165.58	LHQPVVLTDHVVPLCLPER	0	4	_LHQPVVLTDHVVPLC[Carbamidomethyl (C)]LPER_	6	57.8853	886872
3.2.220222.52329	20230926_apagotto_AP14bis_FVII_1ul_all	2	20230921_062328	230920_EC1_apagotto_AP14bis_VII_Mpro_2.raw	2	35612	P08709	0.483	120	0	1.55098	17197830	19	True	True	2165.58	LHQPVVLTDHVVPLCLPER	0	2	_LHQPVVLTDHVVPLC[Carbamidomethyl (C)]LPER_	3	57.935	89709.4
3.2.220222.52329	20230926_apagotto_AP14bis_FVII_1ul_all	2	20230921_062328	230920_EC1_apagotto_AP14bis_VII_Mpro_2.raw	2	35612	P08709	0.483	120	0	1.55098	17197830	19	True	True	1350.46	CHEGYSLLADGVS	0	2	_C[Carbamidomethyl (C)]HEGYSLLADGVS_	6	46.5499	911712
3.2.220222.52329	20230926_apagotto_AP14bis_FVII_1ul_all	2	20230921_062328	230920_EC1_apagotto_AP14bis_VII_Mpro_2.raw	2	35612	P08709	0.483	120	0	1.55098	17197830	19	True	True	1566.86	LHQPVVLTDHVVPL	0	3	_LHQPVVLTDHVVPL_	6	56.4122	104410
3.2.220222.52329	20230926_apagotto_AP14bis_FVII_1ul_all	2	20230921_062328	230920_EC1_apagotto_AP14bis_VII_Mpro_2.raw	2	35612	P08709	0.483	120	0	1.55098	17197830	19	True	True	1566.86	LHQPVVLTDHVVPL	0	2	_LHQPVVLTDHVVPL_	5	56.4614	245816
3.2.220222.52329	20230926_apagotto_AP14bis_FVII_1ul_all	2	20230921_062328	230920_EC1_apagotto_AP14bis_VII_Mpro_2.raw	2	35612	P08709	0.483	120	0	1.55098	17197830	19	True	True	2334.44	NLIAVLGEHDLSEHDGDEQSR	0	3	_NLIAVLGEHDLSEHDGDEQSR_	6	52.0731	1454629
3.2.220222.52329	20230926_apagotto_AP14bis_FVII_1ul_all	2	20230921_062328	230920_EC1_apagotto_AP14bis_VII_Mpro_2.raw	2	35612	P08709	0.483	120	0	1.55098	17197830	19	True	True	892.036	CLPAFEGR	0	2	_C[Carbamidomethyl (C)]LPAFEGR_	6	38.1768	150355
3.2.220222.52329	20230926_apagotto_AP14bis_FVII_1ul_all	2	20230921_062328	230920_EC1_apagotto_AP14bis_VII_Mpro_2.raw	2	35612	P08709	0.483	120	0	1.55098	17197830	19	True	True	1107.2	CHEGYSLLAD	0	2	_C[Carbamidomethyl (C)]HEGYSLLAD_	6	41.6304	233235
3.2.220222.52329	20230926_apagotto_AP14bis_FVII_1ul_all	2	20230921_062328	230920_EC1_apagotto_AP14bis_VII_Mpro_2.raw	2	35612	P08709	0.483	120	0	1.55098	17197830	19	True	True	1322.51	LMTQDCLQQSR	0	2	_LMTQDC[Carbamidomethyl (C)]LQQSR_	6	29.5987	141477
3.2.220222.52329	20230926_apagotto_AP14bis_FVII_1ul_all	2	20230921_062328	230920_EC1_apagotto_AP14bis_VII_Mpro_2.raw	2	35612	P08709	0.483	120	0	1.55098	17197830	19	True	True	1322.51	LMTQDCLQQSR	0	2	_LM[Oxidation (M)]TQDC[Carbamidomethyl (C)]LQQSR_	6	28.9477	505989
3.2.220222.52329	20230926_apagotto_AP14bis_FVII_1ul_all	2	20230921_062328	230920_EC1_apagotto_AP14bis_VII_Mpro_2.raw	2	35612	P08709	0.483	120	0	1.55098	17197830	19	True	True	967.128	SEPRPGVLL	0	2	_SEPRPGVLL_	6	44.9136	117941
3.2.220222.52329	20230926_apagotto_AP14bis_FVII_1ul_all	2	20230921_062328	230920_EC1_apagotto_AP14bis_VII_Mpro_2.raw	2	35612	P08709	0.483	120	0	1.55098	17197830	19	True	True	1875.01	NCETHKDDQLICVNEN	0	3	_[DimethNter0]NC[Carbamidomethyl (C)]ETHKDDQLIC[Carbamidomethyl (C)]VNEN_	6	33.6894	87366.7
3.2.220222.52329	20230926_apagotto_AP14bis_FVII_1ul_all	2	20230921_062328	230920_EC1_apagotto_AP14bis_VII_Mpro_2.raw	2	35612	P08709	0.483	120	0	1.55098	17197830	19	True	True	1319.61	PRPGVLLRAPFP	0	2	_PRPGVLLRAPFP_	6	57.1167	257345
3.2.220222.52329	20230926_apagotto_AP14bis_FVII_1ul_all	2	20230921_062328	230920_EC1_apagotto_AP14bis_VII_Mpro_2.raw	2	35612	P08709	0.483	120	0	1.55098	17197830	19	True	True	1367.54	GCATVGHFGVYTR	0	3	_[DimethNter0]GC[Carbamidomethyl (C)]ATVGHFGVYTR_	5	37.8138	77712.9
3.2.220222.52329	20230926_apagotto_AP14bis_FVII_1ul_all	2	20230921_062328	230920_EC1_apagotto_AP14bis_VII_Mpro_2.raw	2	35612	P08709	0.483	120	0	1.55098	17197830	19	True	True	1207.35	ATVGHFGVYTR	0	3	_[DimethNter0]ATVGHFGVYTR_	6	36.5099	57295.7
3.2.220222.52329	20230926_apagotto_AP14bis_FVII_1ul_all	2	20230921_062328	230920_EC1_apagotto_AP14bis_VII_Mpro_2.raw	2	35612	P08709	0.483	120	0	1.55098	17197830	19	True	True	1021.18	LHQPVVLTD	0	2	_LHQPVVLTD_	6	38.1526	54606.2
3.2.220222.52329	20230926_apagotto_AP14bis_FVII_1ul_all	2	20230921_062328	230920_EC1_apagotto_AP14bis_VII_Mpro_2.raw	2	35612	P08709	0.483	120	0	1.55098	17197830	19	True	True	3474.08	LHQPVVLTDHVVPLCLPERTFSERTLAFVR	0	4	_LHQPVVLTDHVVPLC[Carbamidomethyl (C)]LPERTFSERTLAFVR_	4	65.0459	1681428
3.2.220222.52329	20230926_apagotto_AP14bis_FVII_1ul_all	2	20230921_062328	230920_EC1_apagotto_AP14bis_VII_Mpro_2.raw	2	35612	P08709	0.483	120	0	1.55098	17197830	19	True	True	3474.08	LHQPVVLTDHVVPLCLPERTFSERTLAFVR	0	5	_LHQPVVLTDHVVPLC[Carbamidomethyl (C)]LPERTFSERTLAFVR_	3	65.096	405361
3.2.220222.52329	20230926_apagotto_AP14bis_FVII_1ul_all	2	20230921_062328	230920_EC1_apagotto_AP14bis_VII_Mpro_2.raw	2	35612	P08709	0.483	120	0	1.55098	17197830	19	True	True	836.985	HDIALLR	0	2	_HDIALLR_	5	35.586	861003
3.2.220222.52329	20230926_apagotto_AP14bis_FVII_1ul_all	2	20230921_062328	230920_EC1_apagotto_AP14bis_VII_Mpro_2.raw	2	35612	P08709	0.483	120	0	1.55098	17197830	19	True	True	836.985	HDIALLR	0	2	_[DimethNter0]HDIALLR_	2	36.3496	63830
3.2.220222.52329	20230926_apagotto_AP14bis_FVII_1ul_all	2	20230921_062328	230920_EC1_apagotto_AP14bis_VII_Mpro_2.raw	2	35612	P08709	0.483	120	0	1.55098	17197830	19	True	True	1631.79	NCETHKDDQLICVN	0	2	_NC[Carbamidomethyl (C)]ETHK[DimethLys0]DDQLIC[Carbamidomethyl (C)]VN_	3	34.0241	127528
3.2.220222.52329	20230926_apagotto_AP14bis_FVII_1ul_all	2	20230921_062328	230920_EC1_apagotto_AP14bis_VII_Mpro_2.raw	2	35612	P08709	0.483	120	0	1.55098	17197830	19	True	True	1631.79	NCETHKDDQLICVN	0	3	_NC[Carbamidomethyl (C)]ETHK[DimethLys0]DDQLIC[Carbamidomethyl (C)]VN_	2	34.0716	633786
3.2.220222.52329	20230926_apagotto_AP14bis_FVII_1ul_all	2	20230921_062328	230920_EC1_apagotto_AP14bis_VII_Mpro_2.raw	2	35612	P08709	0.483	120	0	1.55098	17197830	19	True	True	1816.08	RVAQVIIPSTYVPGTTN	0	2	_RVAQVIIPSTYVPGTTN_	5	54.0497	206477
3.2.220222.52329	20230926_apagotto_AP14bis_FVII_1ul_all	2	20230921_062328	230920_EC1_apagotto_AP14bis_VII_Mpro_2.raw	2	35612	P08709	0.483	120	0	1.55098	17197830	19	True	True	1639.97	RGATALELMVLNVPR	0	3	_[DimethNter0]RGATALELMVLNVPR_	3	66.4317	59996.3
3.2.220222.52329	20230926_apagotto_AP14bis_FVII_1ul_all	2	20230921_062328	230920_EC1_apagotto_AP14bis_VII_Mpro_2.raw	2	35612	P08709	0.483	120	0	1.55098	17197830	19	True	True	912.138	VLLRAPFP	0	2	_VLLRAPFP_	4	57.2661	84540.4
3.2.220222.52329	20230926_apagotto_AP14bis_FVII_1ul_all	2	20230921_062328	230920_EC1_apagotto_AP14bis_VII_Mpro_2.raw	2	35612	P08709	0.483	120	0	1.55098	17197830	19	True	True	1279.5	RSEPRPGVLLR	0	3	_RSEPRPGVLLR_	5	29.6822	37201.6
3.2.220222.52329	20230926_apagotto_AP14bis_FVII_1ul_all	2	20230921_062328	230920_EC1_apagotto_AP14bis_VII_Mpro_2.raw	2	35612	P08709	0.483	120	0	1.55098	17197830	19	True	True	1035.17	VGHFGVYTR	0	3	_[DimethNter0]VGHFGVYTR_	5	33.0307	153573
3.2.220222.52329	20230926_apagotto_AP14bis_FVII_1ul_all	2	20230921_062328	230920_EC1_apagotto_AP14bis_VII_Mpro_2.raw	2	35612	P08709	0.483	120	0	1.55098	17197830	19	True	True	3379.9	CHEGYSLLADGVSCTPTVEYPCGKIPILEKR	0	3	_C[Carbamidomethyl (C)]HEGYSLLADGVSC[Carbamidomethyl (C)]TPTVEYPC[Carbamidomethyl (C)]GK[DimethLys0]IPILEK[DimethLys0]R_	3	59.9813	1507904
3.2.220222.52329	20230926_apagotto_AP14bis_FVII_1ul_all	2	20230921_062328	230920_EC1_apagotto_AP14bis_VII_Mpro_2.raw	2	35612	P08709	0.483	120	0	1.55098	17197830	19	True	True	1661.78	NLIAVLGEHDLSEHD	0	2	_NLIAVLGEHDLSEHD_	4	55.9385	192104
3.2.220222.52329	20230926_apagotto_AP14bis_FVII_1ul_all	2	20230921_062328	230920_EC1_apagotto_AP14bis_VII_Mpro_2.raw	2	35612	P08709	0.483	120	0	1.55098	17197830	19	True	True	2344.61	CHEGYSLLADGVSCTPTVEYPC	0	2	_C[Carbamidomethyl (C)]HEGYSLLADGVSC[Carbamidomethyl (C)]TPTVEYPC[Carbamidomethyl (C)]_	4	56.7723	125857
3.2.220222.52329	20230926_apagotto_AP14bis_FVII_1ul_all	2	20230921_062328	230920_EC1_apagotto_AP14bis_VII_Mpro_2.raw	2	35612	P08709	0.483	120	0	1.55098	17197830	19	True	True	2691.01	SCRCHEGYSLLADGVSCTPTVEYPC	0	3	_SC[Carbamidomethyl (C)]RC[Carbamidomethyl (C)]HEGYSLLADGVSC[Carbamidomethyl (C)]TPTVEYPC[Carbamidomethyl (C)]_	4	53.311	113085
3.2.220222.52329	20230926_apagotto_AP14bis_FVII_1ul_all	2	20230921_062328	230920_EC1_apagotto_AP14bis_VII_Mpro_2.raw	2	35612	P08709	0.483	120	0	1.55098	17197830	19	True	True	3307.71	GDEQSRRVAQVIIPSTYVPGTTNHDIALLR	0	4	_[DimethNter0]GDEQSRRVAQVIIPSTYVPGTTNHDIALLR_	4	58.4216	88932.2
3.2.220222.52329	20230926_apagotto_AP14bis_FVII_1ul_all	2	20230921_062328	230920_EC1_apagotto_AP14bis_VII_Mpro_2.raw	2	35612	P08709	0.483	120	0	1.55098	17197830	19	True	True	1310.49	CATVGHFGVYTR	0	3	_[DimethNter0]C[Carbamidomethyl (C)]ATVGHFGVYTR_	4	37.74	65319.9
3.2.220222.52329	20230926_apagotto_AP14bis_FVII_1ul_all	2	20230921_062328	230920_EC1_apagotto_AP14bis_VII_Mpro_2.raw	2	35612	P08709	0.483	120	0	1.55098	17197830	19	True	True	3498.75	NCETHKDDQLICVNENGGCEQYCSDHTGTKR	0	5	_NC[Carbamidomethyl (C)]ETHK[DimethLys0]DDQLIC[Carbamidomethyl (C)]VNENGGC[Carbamidomethyl (C)]EQYC[Carbamidomethyl (C)]SDHTGTK[DimethLys0]R_	3	31.1774	7324.88
3.2.220222.52329	20230926_apagotto_AP14bis_FVII_1ul_all	2	20230921_062328	230920_EC1_apagotto_AP14bis_VII_Mpro_2.raw	2	35612	P08709	0.483	120	0	1.55098	17197830	19	True	True	2309.81	IVGGKVCPKGECPWQVLLLVNG	0	3	_IVGGK[DimethLys0]VC[Carbamidomethyl (C)]PK[DimethLys0]GEC[Carbamidomethyl (C)]PWQVLLLVNG_	2	63.424	3048310
3.2.220222.52329	20230926_apagotto_AP14bis_FVII_1ul_all	2	20230921_062328	230920_EC1_apagotto_AP14bis_VII_Mpro_2.raw	2	35612	P08709	0.483	120	0	1.55098	17197830	19	True	True	2309.81	IVGGKVCPKGECPWQVLLLVNG	0	2	_IVGGK[DimethLys0]VC[Carbamidomethyl (C)]PK[DimethLys0]GEC[Carbamidomethyl (C)]PWQVLLLVNG_	1	63.4738	305120
3.2.220222.52329	20230926_apagotto_AP14bis_FVII_1ul_all	2	20230921_062328	230920_EC1_apagotto_AP14bis_VII_Mpro_2.raw	2	35612	P08709	0.483	120	0	1.55098	17197830	19	True	True	4951.48	NLIAVLGEHDLSEHDGDEQSRRVAQVIIPSTYVPGTTNHDIALLR	0	5	_NLIAVLGEHDLSEHDGDEQSRRVAQVIIPSTYVPGTTNHDIALLR_	3	65.1956	871940
3.2.220222.52329	20230926_apagotto_AP14bis_FVII_1ul_all	2	20230921_062328	230920_EC1_apagotto_AP14bis_VII_Mpro_2.raw	2	35612	P08709	0.483	120	0	1.55098	17197830	19	True	True	4951.48	NLIAVLGEHDLSEHDGDEQSRRVAQVIIPSTYVPGTTNHDIALLR	0	6	_NLIAVLGEHDLSEHDGDEQSRRVAQVIIPSTYVPGTTNHDIALLR_	3	65.1458	405219
3.2.220222.52329	20230926_apagotto_AP14bis_FVII_1ul_all	2	20230921_062328	230920_EC1_apagotto_AP14bis_VII_Mpro_2.raw	2	35612	P08709	0.483	120	0	1.55098	17197830	19	True	True	813.006	LLRAPFP	0	2	_[DimethNter0]LLRAPFP_	3	52.4698	2167190
3.2.220222.52329	20230926_apagotto_AP14bis_FVII_1ul_all	2	20230921_062328	230920_EC1_apagotto_AP14bis_VII_Mpro_2.raw	2	35612	P08709	0.483	120	0	1.55098	17197830	19	True	True	1641.75	GGCEQYCSDHTGTKR	0	4	_[DimethNter0]GGC[Carbamidomethyl (C)]EQYC[Carbamidomethyl (C)]SDHTGTK[DimethLys0]R_	3	15.7279	84580.7
3.2.220222.52329	20230926_apagotto_AP14bis_FVII_1ul_all	2	20230921_062328	230920_EC1_apagotto_AP14bis_VII_Mpro_2.raw	2	35612	P08709	0.483	120	0	1.55098	17197830	19	True	True	951.089	NHDIALLR	0	2	_[DimethNter0]NHDIALLR_	3	36.5595	67287.6
3.2.220222.52329	20230926_apagotto_AP14bis_FVII_1ul_all	2	20230921_062328	230920_EC1_apagotto_AP14bis_VII_Mpro_2.raw	2	35612	P08709	0.483	120	0	1.55098	17197830	19	True	True	740.81	SEPRPGV	0	2	_SEPRPGV_	3	19.7997	42417.9
3.2.220222.52329	20230926_apagotto_AP14bis_FVII_1ul_all	2	20230921_062328	230920_EC1_apagotto_AP14bis_VII_Mpro_2.raw	2	35612	P08709	0.483	120	0	1.55098	17197830	19	True	True	1453.6	SCRCHEGYSLLAD	0	2	_SC[Carbamidomethyl (C)]RC[Carbamidomethyl (C)]HEGYSLLAD_	3	36.8469	0
3.2.220222.52329	20230926_apagotto_AP14bis_FVII_1ul_all	2	20230921_062328	230920_EC1_apagotto_AP14bis_VII_Mpro_2.raw	2	35612	P08709	0.483	120	0	1.55098	17197830	19	True	True	2502.99	ELMVLNVPRLMTQDCLQQSRK	0	3	_ELM[Oxidation (M)]VLNVPRLM[Oxidation (M)]TQDC[Carbamidomethyl (C)]LQQSRK[DimethLys0]_	1	50.5953	2330081
3.2.220222.52329	20230926_apagotto_AP14bis_FVII_1ul_all	2	20230921_062328	230920_EC1_apagotto_AP14bis_VII_Mpro_2.raw	2	35612	P08709	0.483	120	0	1.55098	17197830	19	True	True	4132.51	NLIAVLGEHDLSEHDGDEQSRRVAQVIIPSTYVPGTTN	0	4	_NLIAVLGEHDLSEHDGDEQSRRVAQVIIPSTYVPGTTN_	2	63.9848	127762
3.2.220222.52329	20230926_apagotto_AP14bis_FVII_1ul_all	3	20230921_080538	230920_EC1_apagotto_AP14bis_VII_Mpro_3.raw	2	36947	P08709	0.453	128	0	1.55098	30228830	24	True	True	2478.87	VAQVIIPSTYVPGTTNHDIALLR	0	3	_VAQVIIPSTYVPGTTNHDIALLR_	6	63.4203	8087686
3.2.220222.52329	20230926_apagotto_AP14bis_FVII_1ul_all	3	20230921_080538	230920_EC1_apagotto_AP14bis_VII_Mpro_3.raw	2	36947	P08709	0.453	128	0	1.55098	30228830	24	True	True	2478.87	VAQVIIPSTYVPGTTNHDIALLR	0	2	_VAQVIIPSTYVPGTTNHDIALLR_	5	63.4703	2190537
3.2.220222.52329	20230926_apagotto_AP14bis_FVII_1ul_all	3	20230921_080538	230920_EC1_apagotto_AP14bis_VII_Mpro_3.raw	2	36947	P08709	0.453	128	0	1.55098	30228830	24	True	True	2478.87	VAQVIIPSTYVPGTTNHDIALLR	0	3	_[DimethNter0]VAQVIIPSTYVPGTTNHDIALLR_	5	64.6808	376361
3.2.220222.52329	20230926_apagotto_AP14bis_FVII_1ul_all	3	20230921_080538	230920_EC1_apagotto_AP14bis_VII_Mpro_3.raw	2	36947	P08709	0.453	128	0	1.55098	30228830	24	True	True	2165.58	LHQPVVLTDHVVPLCLPER	0	4	_LHQPVVLTDHVVPLC[Carbamidomethyl (C)]LPER_	6	57.7799	1708273
3.2.220222.52329	20230926_apagotto_AP14bis_FVII_1ul_all	3	20230921_080538	230920_EC1_apagotto_AP14bis_VII_Mpro_3.raw	2	36947	P08709	0.453	128	0	1.55098	30228830	24	True	True	2165.58	LHQPVVLTDHVVPLCLPER	0	3	_LHQPVVLTDHVVPLC[Carbamidomethyl (C)]LPER_	3	57.7799	3282728
3.2.220222.52329	20230926_apagotto_AP14bis_FVII_1ul_all	3	20230921_080538	230920_EC1_apagotto_AP14bis_VII_Mpro_3.raw	2	36947	P08709	0.453	128	0	1.55098	30228830	24	True	True	2165.58	LHQPVVLTDHVVPLCLPER	0	2	_LHQPVVLTDHVVPLC[Carbamidomethyl (C)]LPER_	3	57.8294	439610
3.2.220222.52329	20230926_apagotto_AP14bis_FVII_1ul_all	3	20230921_080538	230920_EC1_apagotto_AP14bis_VII_Mpro_3.raw	2	36947	P08709	0.453	128	0	1.55098	30228830	24	True	True	2635.06	RVAQVIIPSTYVPGTTNHDIALLR	0	4	_RVAQVIIPSTYVPGTTNHDIALLR_	6	59.5598	4002211
3.2.220222.52329	20230926_apagotto_AP14bis_FVII_1ul_all	3	20230921_080538	230920_EC1_apagotto_AP14bis_VII_Mpro_3.raw	2	36947	P08709	0.453	128	0	1.55098	30228830	24	True	True	2635.06	RVAQVIIPSTYVPGTTNHDIALLR	0	3	_RVAQVIIPSTYVPGTTNHDIALLR_	6	59.5598	3224652
3.2.220222.52329	20230926_apagotto_AP14bis_FVII_1ul_all	3	20230921_080538	230920_EC1_apagotto_AP14bis_VII_Mpro_3.raw	2	36947	P08709	0.453	128	0	1.55098	30228830	24	True	True	1535.8	SEPRPGVLLRAPFP	0	3	_SEPRPGVLLRAPFP_	6	56.786	2799245
3.2.220222.52329	20230926_apagotto_AP14bis_FVII_1ul_all	3	20230921_080538	230920_EC1_apagotto_AP14bis_VII_Mpro_3.raw	2	36947	P08709	0.453	128	0	1.55098	30228830	24	True	True	1535.8	SEPRPGVLLRAPFP	0	2	_SEPRPGVLLRAPFP_	5	56.786	403487
3.2.220222.52329	20230926_apagotto_AP14bis_FVII_1ul_all	3	20230921_080538	230920_EC1_apagotto_AP14bis_VII_Mpro_3.raw	2	36947	P08709	0.453	128	0	1.55098	30228830	24	True	True	1535.8	SEPRPGVLLRAPFP	0	3	_[DimethNter0]SEPRPGVLLRAPFP_	3	57.8294	1848054
3.2.220222.52329	20230926_apagotto_AP14bis_FVII_1ul_all	3	20230921_080538	230920_EC1_apagotto_AP14bis_VII_Mpro_3.raw	2	36947	P08709	0.453	128	0	1.55098	30228830	24	True	True	2334.44	NLIAVLGEHDLSEHDGDEQSR	0	3	_NLIAVLGEHDLSEHDGDEQSR_	6	51.3797	1749212
3.2.220222.52329	20230926_apagotto_AP14bis_FVII_1ul_all	3	20230921_080538	230920_EC1_apagotto_AP14bis_VII_Mpro_3.raw	2	36947	P08709	0.453	128	0	1.55098	30228830	24	True	True	2334.44	NLIAVLGEHDLSEHDGDEQSR	0	2	_NLIAVLGEHDLSEHDGDEQSR_	2	51.4799	116774
3.2.220222.52329	20230926_apagotto_AP14bis_FVII_1ul_all	3	20230921_080538	230920_EC1_apagotto_AP14bis_VII_Mpro_3.raw	2	36947	P08709	0.453	128	0	1.55098	30228830	24	True	True	1566.86	LHQPVVLTDHVVPL	0	3	_LHQPVVLTDHVVPL_	6	56.405	290497
3.2.220222.52329	20230926_apagotto_AP14bis_FVII_1ul_all	3	20230921_080538	230920_EC1_apagotto_AP14bis_VII_Mpro_3.raw	2	36947	P08709	0.453	128	0	1.55098	30228830	24	True	True	1566.86	LHQPVVLTDHVVPL	0	2	_LHQPVVLTDHVVPL_	5	56.405	721562
3.2.220222.52329	20230926_apagotto_AP14bis_FVII_1ul_all	3	20230921_080538	230920_EC1_apagotto_AP14bis_VII_Mpro_3.raw	2	36947	P08709	0.453	128	0	1.55098	30228830	24	True	True	892.036	CLPAFEGR	0	2	_C[Carbamidomethyl (C)]LPAFEGR_	6	38.1595	616516
3.2.220222.52329	20230926_apagotto_AP14bis_FVII_1ul_all	3	20230921_080538	230920_EC1_apagotto_AP14bis_VII_Mpro_3.raw	2	36947	P08709	0.453	128	0	1.55098	30228830	24	True	True	1123.32	SEPRPGVLLR	0	3	_SEPRPGVLLR_	5	34.6013	429406
3.2.220222.52329	20230926_apagotto_AP14bis_FVII_1ul_all	3	20230921_080538	230920_EC1_apagotto_AP14bis_VII_Mpro_3.raw	2	36947	P08709	0.453	128	0	1.55098	30228830	24	True	True	1123.32	SEPRPGVLLR	0	3	_[DimethNter0]SEPRPGVLLR_	5	35.8306	111444
3.2.220222.52329	20230926_apagotto_AP14bis_FVII_1ul_all	3	20230921_080538	230920_EC1_apagotto_AP14bis_VII_Mpro_3.raw	2	36947	P08709	0.453	128	0	1.55098	30228830	24	True	True	1123.32	SEPRPGVLLR	0	2	_SEPRPGVLLR_	2	34.5616	339224
3.2.220222.52329	20230926_apagotto_AP14bis_FVII_1ul_all	3	20230921_080538	230920_EC1_apagotto_AP14bis_VII_Mpro_3.raw	2	36947	P08709	0.453	128	0	1.55098	30228830	24	True	True	2786.24	LHQPVVLTDHVVPLCLPERTFSER	0	5	_LHQPVVLTDHVVPLC[Carbamidomethyl (C)]LPERTFSER_	6	58.52	0
3.2.220222.52329	20230926_apagotto_AP14bis_FVII_1ul_all	3	20230921_080538	230920_EC1_apagotto_AP14bis_VII_Mpro_3.raw	2	36947	P08709	0.453	128	0	1.55098	30228830	24	True	True	2786.24	LHQPVVLTDHVVPLCLPERTFSER	0	4	_LHQPVVLTDHVVPLC[Carbamidomethyl (C)]LPERTFSER_	5	58.3728	230083
3.2.220222.52329	20230926_apagotto_AP14bis_FVII_1ul_all	3	20230921_080538	230920_EC1_apagotto_AP14bis_VII_Mpro_3.raw	2	36947	P08709	0.453	128	0	1.55098	30228830	24	True	True	2786.24	LHQPVVLTDHVVPLCLPERTFSER	0	3	_LHQPVVLTDHVVPLC[Carbamidomethyl (C)]LPERTFSER_	3	58.4711	687075
3.2.220222.52329	20230926_apagotto_AP14bis_FVII_1ul_all	3	20230921_080538	230920_EC1_apagotto_AP14bis_VII_Mpro_3.raw	2	36947	P08709	0.453	128	0	1.55098	30228830	24	True	True	2490.62	NLIAVLGEHDLSEHDGDEQSRR	0	4	_NLIAVLGEHDLSEHDGDEQSRR_	6	48.6742	336909
3.2.220222.52329	20230926_apagotto_AP14bis_FVII_1ul_all	3	20230921_080538	230920_EC1_apagotto_AP14bis_VII_Mpro_3.raw	2	36947	P08709	0.453	128	0	1.55098	30228830	24	True	True	2490.62	NLIAVLGEHDLSEHDGDEQSRR	0	3	_NLIAVLGEHDLSEHDGDEQSRR_	3	48.6742	931581
3.2.220222.52329	20230926_apagotto_AP14bis_FVII_1ul_all	3	20230921_080538	230920_EC1_apagotto_AP14bis_VII_Mpro_3.raw	2	36947	P08709	0.453	128	0	1.55098	30228830	24	True	True	1326.51	TFSERTLAFVR	0	3	_TFSERTLAFVR_	6	46.7462	301724
3.2.220222.52329	20230926_apagotto_AP14bis_FVII_1ul_all	3	20230921_080538	230920_EC1_apagotto_AP14bis_VII_Mpro_3.raw	2	36947	P08709	0.453	128	0	1.55098	30228830	24	True	True	1326.51	TFSERTLAFVR	0	2	_TFSERTLAFVR_	3	46.6968	267597
3.2.220222.52329	20230926_apagotto_AP14bis_FVII_1ul_all	3	20230921_080538	230920_EC1_apagotto_AP14bis_VII_Mpro_3.raw	2	36947	P08709	0.453	128	0	1.55098	30228830	24	True	True	967.128	SEPRPGVLL	0	2	_SEPRPGVLL_	6	44.8679	270656
3.2.220222.52329	20230926_apagotto_AP14bis_FVII_1ul_all	3	20230921_080538	230920_EC1_apagotto_AP14bis_VII_Mpro_3.raw	2	36947	P08709	0.453	128	0	1.55098	30228830	24	True	True	1322.51	LMTQDCLQQSR	0	2	_LM[Oxidation (M)]TQDC[Carbamidomethyl (C)]LQQSR_	6	27.9615	457487
3.2.220222.52329	20230926_apagotto_AP14bis_FVII_1ul_all	3	20230921_080538	230920_EC1_apagotto_AP14bis_VII_Mpro_3.raw	2	36947	P08709	0.453	128	0	1.55098	30228830	24	True	True	1322.51	LMTQDCLQQSR	0	2	_LMTQDC[Carbamidomethyl (C)]LQQSR_	6	29.8674	179960
3.2.220222.52329	20230926_apagotto_AP14bis_FVII_1ul_all	3	20230921_080538	230920_EC1_apagotto_AP14bis_VII_Mpro_3.raw	2	36947	P08709	0.453	128	0	1.55098	30228830	24	True	True	1696.87	SCRCHEGYSLLADGVS	0	3	_SC[Carbamidomethyl (C)]RC[Carbamidomethyl (C)]HEGYSLLADGVS_	6	40.9104	827263
3.2.220222.52329	20230926_apagotto_AP14bis_FVII_1ul_all	3	20230921_080538	230920_EC1_apagotto_AP14bis_VII_Mpro_3.raw	2	36947	P08709	0.453	128	0	1.55098	30228830	24	True	True	1696.87	SCRCHEGYSLLADGVS	0	2	_SC[Carbamidomethyl (C)]RC[Carbamidomethyl (C)]HEGYSLLADGVS_	3	41.9352	1041969
3.2.220222.52329	20230926_apagotto_AP14bis_FVII_1ul_all	3	20230921_080538	230920_EC1_apagotto_AP14bis_VII_Mpro_3.raw	2	36947	P08709	0.453	128	0	1.55098	30228830	24	True	True	1107.2	CHEGYSLLAD	0	2	_C[Carbamidomethyl (C)]HEGYSLLAD_	6	41.594	390182
3.2.220222.52329	20230926_apagotto_AP14bis_FVII_1ul_all	3	20230921_080538	230920_EC1_apagotto_AP14bis_VII_Mpro_3.raw	2	36947	P08709	0.453	128	0	1.55098	30228830	24	True	True	1367.54	GCATVGHFGVYTR	0	3	_[DimethNter0]GC[Carbamidomethyl (C)]ATVGHFGVYTR_	5	37.9655	151097
3.2.220222.52329	20230926_apagotto_AP14bis_FVII_1ul_all	3	20230921_080538	230920_EC1_apagotto_AP14bis_VII_Mpro_3.raw	2	36947	P08709	0.453	128	0	1.55098	30228830	24	True	True	1367.54	GCATVGHFGVYTR	0	2	_GC[Carbamidomethyl (C)]ATVGHFGVYTR_	2	36.9579	116286
3.2.220222.52329	20230926_apagotto_AP14bis_FVII_1ul_all	3	20230921_080538	230920_EC1_apagotto_AP14bis_VII_Mpro_3.raw	2	36947	P08709	0.453	128	0	1.55098	30228830	24	True	True	1367.54	GCATVGHFGVYTR	0	2	_[DimethNter0]GC[Carbamidomethyl (C)]ATVGHFGVYTR_	2	37.9655	65792.2
3.2.220222.52329	20230926_apagotto_AP14bis_FVII_1ul_all	3	20230921_080538	230920_EC1_apagotto_AP14bis_VII_Mpro_3.raw	2	36947	P08709	0.453	128	0	1.55098	30228830	24	True	True	1350.46	CHEGYSLLADGVS	0	2	_C[Carbamidomethyl (C)]HEGYSLLADGVS_	6	45.0568	2163486
3.2.220222.52329	20230926_apagotto_AP14bis_FVII_1ul_all	3	20230921_080538	230920_EC1_apagotto_AP14bis_VII_Mpro_3.raw	2	36947	P08709	0.453	128	0	1.55098	30228830	24	True	True	1021.18	LHQPVVLTD	0	2	_LHQPVVLTD_	6	38.1595	101418
3.2.220222.52329	20230926_apagotto_AP14bis_FVII_1ul_all	3	20230921_080538	230920_EC1_apagotto_AP14bis_VII_Mpro_3.raw	2	36947	P08709	0.453	128	0	1.55098	30228830	24	True	True	1319.61	PRPGVLLRAPFP	0	2	_PRPGVLLRAPFP_	6	57.0844	177205
3.2.220222.52329	20230926_apagotto_AP14bis_FVII_1ul_all	3	20230921_080538	230920_EC1_apagotto_AP14bis_VII_Mpro_3.raw	2	36947	P08709	0.453	128	0	1.55098	30228830	24	True	True	1207.35	ATVGHFGVYTR	0	3	_[DimethNter0]ATVGHFGVYTR_	6	36.4266	66335.9
3.2.220222.52329	20230926_apagotto_AP14bis_FVII_1ul_all	3	20230921_080538	230920_EC1_apagotto_AP14bis_VII_Mpro_3.raw	2	36947	P08709	0.453	128	0	1.55098	30228830	24	True	True	1207.35	ATVGHFGVYTR	0	3	_ATVGHFGVYTR_	1	34.993	21888.1
3.2.220222.52329	20230926_apagotto_AP14bis_FVII_1ul_all	3	20230921_080538	230920_EC1_apagotto_AP14bis_VII_Mpro_3.raw	2	36947	P08709	0.453	128	0	1.55098	30228830	24	True	True	1875.01	NCETHKDDQLICVNEN	0	3	_[DimethNter0]NC[Carbamidomethyl (C)]ETHKDDQLIC[Carbamidomethyl (C)]VNEN_	6	33.4437	202562
3.2.220222.52329	20230926_apagotto_AP14bis_FVII_1ul_all	3	20230921_080538	230920_EC1_apagotto_AP14bis_VII_Mpro_3.raw	2	36947	P08709	0.453	128	0	1.55098	30228830	24	True	True	3474.08	LHQPVVLTDHVVPLCLPERTFSERTLAFVR	0	4	_LHQPVVLTDHVVPLC[Carbamidomethyl (C)]LPERTFSERTLAFVR_	4	64.7627	1196340
3.2.220222.52329	20230926_apagotto_AP14bis_FVII_1ul_all	3	20230921_080538	230920_EC1_apagotto_AP14bis_VII_Mpro_3.raw	2	36947	P08709	0.453	128	0	1.55098	30228830	24	True	True	3474.08	LHQPVVLTDHVVPLCLPERTFSERTLAFVR	0	5	_LHQPVVLTDHVVPLC[Carbamidomethyl (C)]LPERTFSERTLAFVR_	3	64.7627	1471638
3.2.220222.52329	20230926_apagotto_AP14bis_FVII_1ul_all	3	20230921_080538	230920_EC1_apagotto_AP14bis_VII_Mpro_3.raw	2	36947	P08709	0.453	128	0	1.55098	30228830	24	True	True	1816.08	RVAQVIIPSTYVPGTTN	0	2	_RVAQVIIPSTYVPGTTN_	5	54.0721	1020521
3.2.220222.52329	20230926_apagotto_AP14bis_FVII_1ul_all	3	20230921_080538	230920_EC1_apagotto_AP14bis_VII_Mpro_3.raw	2	36947	P08709	0.453	128	0	1.55098	30228830	24	True	True	836.985	HDIALLR	0	2	_HDIALLR_	5	35.4097	935085
3.2.220222.52329	20230926_apagotto_AP14bis_FVII_1ul_all	3	20230921_080538	230920_EC1_apagotto_AP14bis_VII_Mpro_3.raw	2	36947	P08709	0.453	128	0	1.55098	30228830	24	True	True	1035.17	VGHFGVYTR	0	3	_[DimethNter0]VGHFGVYTR_	5	32.8001	215744
3.2.220222.52329	20230926_apagotto_AP14bis_FVII_1ul_all	3	20230921_080538	230920_EC1_apagotto_AP14bis_VII_Mpro_3.raw	2	36947	P08709	0.453	128	0	1.55098	30228830	24	True	True	1035.17	VGHFGVYTR	0	2	_[DimethNter0]VGHFGVYTR_	1	35.861	255300
3.2.220222.52329	20230926_apagotto_AP14bis_FVII_1ul_all	3	20230921_080538	230920_EC1_apagotto_AP14bis_VII_Mpro_3.raw	2	36947	P08709	0.453	128	0	1.55098	30228830	24	True	True	1659.9	VAQVIIPSTYVPGTTN	0	2	_VAQVIIPSTYVPGTTN_	5	58.1735	204408
3.2.220222.52329	20230926_apagotto_AP14bis_FVII_1ul_all	3	20230921_080538	230920_EC1_apagotto_AP14bis_VII_Mpro_3.raw	2	36947	P08709	0.453	128	0	1.55098	30228830	24	True	True	1279.5	RSEPRPGVLLR	0	3	_RSEPRPGVLLR_	5	30.0067	106484
3.2.220222.52329	20230926_apagotto_AP14bis_FVII_1ul_all	3	20230921_080538	230920_EC1_apagotto_AP14bis_VII_Mpro_3.raw	2	36947	P08709	0.453	128	0	1.55098	30228830	24	True	True	1631.79	NCETHKDDQLICVN	0	2	_NC[Carbamidomethyl (C)]ETHK[DimethLys0]DDQLIC[Carbamidomethyl (C)]VN_	3	34.1366	91038.6
3.2.220222.52329	20230926_apagotto_AP14bis_FVII_1ul_all	3	20230921_080538	230920_EC1_apagotto_AP14bis_VII_Mpro_3.raw	2	36947	P08709	0.453	128	0	1.55098	30228830	24	True	True	1136.27	TVGHFGVYTR	0	3	_[DimethNter0]TVGHFGVYTR_	5	34.9048	69070
3.2.220222.52329	20230926_apagotto_AP14bis_FVII_1ul_all	3	20230921_080538	230920_EC1_apagotto_AP14bis_VII_Mpro_3.raw	2	36947	P08709	0.453	128	0	1.55098	30228830	24	True	True	3379.9	CHEGYSLLADGVSCTPTVEYPCGKIPILEKR	0	3	_C[Carbamidomethyl (C)]HEGYSLLADGVSC[Carbamidomethyl (C)]TPTVEYPC[Carbamidomethyl (C)]GK[DimethLys0]IPILEK[DimethLys0]R_	3	59.9548	1056473
3.2.220222.52329	20230926_apagotto_AP14bis_FVII_1ul_all	3	20230921_080538	230920_EC1_apagotto_AP14bis_VII_Mpro_3.raw	2	36947	P08709	0.453	128	0	1.55098	30228830	24	True	True	3379.9	CHEGYSLLADGVSCTPTVEYPCGKIPILEKR	0	4	_C[Carbamidomethyl (C)]HEGYSLLADGVSC[Carbamidomethyl (C)]TPTVEYPC[Carbamidomethyl (C)]GK[DimethLys0]IPILEK[DimethLys0]R_	3	59.1617	57885.3
3.2.220222.52329	20230926_apagotto_AP14bis_FVII_1ul_all	3	20230921_080538	230920_EC1_apagotto_AP14bis_VII_Mpro_3.raw	2	36947	P08709	0.453	128	0	1.55098	30228830	24	True	True	3379.9	CHEGYSLLADGVSCTPTVEYPCGKIPILEKR	0	5	_C[Carbamidomethyl (C)]HEGYSLLADGVSC[Carbamidomethyl (C)]TPTVEYPC[Carbamidomethyl (C)]GK[DimethLys0]IPILEK[DimethLys0]R_	2	59.2108	0
3.2.220222.52329	20230926_apagotto_AP14bis_FVII_1ul_all	3	20230921_080538	230920_EC1_apagotto_AP14bis_VII_Mpro_3.raw	2	36947	P08709	0.453	128	0	1.55098	30228830	24	True	True	1310.49	CATVGHFGVYTR	0	3	_[DimethNter0]C[Carbamidomethyl (C)]ATVGHFGVYTR_	4	37.9156	139698
3.2.220222.52329	20230926_apagotto_AP14bis_FVII_1ul_all	3	20230921_080538	230920_EC1_apagotto_AP14bis_VII_Mpro_3.raw	2	36947	P08709	0.453	128	0	1.55098	30228830	24	True	True	2344.61	CHEGYSLLADGVSCTPTVEYPC	0	2	_C[Carbamidomethyl (C)]HEGYSLLADGVSC[Carbamidomethyl (C)]TPTVEYPC[Carbamidomethyl (C)]_	4	56.7361	107475
3.2.220222.52329	20230926_apagotto_AP14bis_FVII_1ul_all	3	20230921_080538	230920_EC1_apagotto_AP14bis_VII_Mpro_3.raw	2	36947	P08709	0.453	128	0	1.55098	30228830	24	True	True	907.122	PRPGVLLR	0	2	_PRPGVLLR_	4	34.6893	84773.1
3.2.220222.52329	20230926_apagotto_AP14bis_FVII_1ul_all	3	20230921_080538	230920_EC1_apagotto_AP14bis_VII_Mpro_3.raw	2	36947	P08709	0.453	128	0	1.55098	30228830	24	True	True	3307.71	GDEQSRRVAQVIIPSTYVPGTTNHDIALLR	0	4	_[DimethNter0]GDEQSRRVAQVIIPSTYVPGTTNHDIALLR_	4	58.1735	51044.8
3.2.220222.52329	20230926_apagotto_AP14bis_FVII_1ul_all	3	20230921_080538	230920_EC1_apagotto_AP14bis_VII_Mpro_3.raw	2	36947	P08709	0.453	128	0	1.55098	30228830	24	True	True	3307.71	GDEQSRRVAQVIIPSTYVPGTTNHDIALLR	0	4	_GDEQSRRVAQVIIPSTYVPGTTNHDIALLR_	1	57.8792	76001.7
3.2.220222.52329	20230926_apagotto_AP14bis_FVII_1ul_all	3	20230921_080538	230920_EC1_apagotto_AP14bis_VII_Mpro_3.raw	2	36947	P08709	0.453	128	0	1.55098	30228830	24	True	True	1078.16	TQDCLQQSR	0	2	_TQDC[Carbamidomethyl (C)]LQQSR_	4	17.4501	59047.4
3.2.220222.52329	20230926_apagotto_AP14bis_FVII_1ul_all	3	20230921_080538	230920_EC1_apagotto_AP14bis_VII_Mpro_3.raw	2	36947	P08709	0.453	128	0	1.55098	30228830	24	True	True	3498.75	NCETHKDDQLICVNENGGCEQYCSDHTGTKR	0	5	_NC[Carbamidomethyl (C)]ETHK[DimethLys0]DDQLIC[Carbamidomethyl (C)]VNENGGC[Carbamidomethyl (C)]EQYC[Carbamidomethyl (C)]SDHTGTK[DimethLys0]R_	3	31.8206	88600.7
3.2.220222.52329	20230926_apagotto_AP14bis_FVII_1ul_all	3	20230921_080538	230920_EC1_apagotto_AP14bis_VII_Mpro_3.raw	2	36947	P08709	0.453	128	0	1.55098	30228830	24	True	True	3498.75	NCETHKDDQLICVNENGGCEQYCSDHTGTKR	0	5	_[DimethNter0]NC[Carbamidomethyl (C)]ETHK[DimethLys0]DDQLIC[Carbamidomethyl (C)]VNENGGC[Carbamidomethyl (C)]EQYC[Carbamidomethyl (C)]SDHTGTK[DimethLys0]R_	1	30.0067	0
3.2.220222.52329	20230926_apagotto_AP14bis_FVII_1ul_all	3	20230921_080538	230920_EC1_apagotto_AP14bis_VII_Mpro_3.raw	2	36947	P08709	0.453	128	0	1.55098	30228830	24	True	True	2309.81	IVGGKVCPKGECPWQVLLLVNG	0	3	_IVGGK[DimethLys0]VC[Carbamidomethyl (C)]PK[DimethLys0]GEC[Carbamidomethyl (C)]PWQVLLLVNG_	2	64.6808	782444
3.2.220222.52329	20230926_apagotto_AP14bis_FVII_1ul_all	3	20230921_080538	230920_EC1_apagotto_AP14bis_VII_Mpro_3.raw	2	36947	P08709	0.453	128	0	1.55098	30228830	24	True	True	813.006	LLRAPFP	0	2	_[DimethNter0]LLRAPFP_	3	52.4485	4221904
3.2.220222.52329	20230926_apagotto_AP14bis_FVII_1ul_all	3	20230921_080538	230920_EC1_apagotto_AP14bis_VII_Mpro_3.raw	2	36947	P08709	0.453	128	0	1.55098	30228830	24	True	True	1453.6	SCRCHEGYSLLAD	0	2	_SC[Carbamidomethyl (C)]RC[Carbamidomethyl (C)]HEGYSLLAD_	3	36.8827	313237
3.2.220222.52329	20230926_apagotto_AP14bis_FVII_1ul_all	3	20230921_080538	230920_EC1_apagotto_AP14bis_VII_Mpro_3.raw	2	36947	P08709	0.453	128	0	1.55098	30228830	24	True	True	1453.6	SCRCHEGYSLLAD	0	3	_SC[Carbamidomethyl (C)]RC[Carbamidomethyl (C)]HEGYSLLAD_	2	36.9739	137990
3.2.220222.52329	20230926_apagotto_AP14bis_FVII_1ul_all	3	20230921_080538	230920_EC1_apagotto_AP14bis_VII_Mpro_3.raw	2	36947	P08709	0.453	128	0	1.55098	30228830	24	True	True	4951.48	NLIAVLGEHDLSEHDGDEQSRRVAQVIIPSTYVPGTTNHDIALLR	0	5	_NLIAVLGEHDLSEHDGDEQSRRVAQVIIPSTYVPGTTNHDIALLR_	3	65.0731	612138
3.2.220222.52329	20230926_apagotto_AP14bis_FVII_1ul_all	3	20230921_080538	230920_EC1_apagotto_AP14bis_VII_Mpro_3.raw	2	36947	P08709	0.453	128	0	1.55098	30228830	24	True	True	4951.48	NLIAVLGEHDLSEHDGDEQSRRVAQVIIPSTYVPGTTNHDIALLR	0	6	_NLIAVLGEHDLSEHDGDEQSRRVAQVIIPSTYVPGTTNHDIALLR_	3	65.0731	183245
3.2.220222.52329	20230926_apagotto_AP14bis_FVII_1ul_all	3	20230921_080538	230920_EC1_apagotto_AP14bis_VII_Mpro_3.raw	2	36947	P08709	0.453	128	0	1.55098	30228830	24	True	True	4951.48	NLIAVLGEHDLSEHDGDEQSRRVAQVIIPSTYVPGTTNHDIALLR	0	4	_NLIAVLGEHDLSEHDGDEQSRRVAQVIIPSTYVPGTTNHDIALLR_	1	65.123	0
3.2.220222.52329	20230926_apagotto_AP14bis_FVII_1ul_all	3	20230921_080538	230920_EC1_apagotto_AP14bis_VII_Mpro_3.raw	2	36947	P08709	0.453	128	0	1.55098	30228830	24	True	True	740.81	SEPRPGV	0	2	_SEPRPGV_	3	19.6728	55997.8
3.2.220222.52329	20230926_apagotto_AP14bis_FVII_1ul_all	3	20230921_080538	230920_EC1_apagotto_AP14bis_VII_Mpro_3.raw	2	36947	P08709	0.453	128	0	1.55098	30228830	24	True	True	940.105	TLAFVRFS	0	2	_TLAFVRFS_	2	50.3162	360102
3.2.220222.52329	20230926_apagotto_AP14bis_FVII_1ul_all	3	20230921_080538	230920_EC1_apagotto_AP14bis_VII_Mpro_3.raw	2	36947	P08709	0.453	128	0	1.55098	30228830	24	True	True	2512.67	NCETHKDDQLICVNENGGCEQY	0	3	_NC[Carbamidomethyl (C)]ETHK[DimethLys0]DDQLIC[Carbamidomethyl (C)]VNENGGC[Carbamidomethyl (C)]EQY_	2	38.0657	256634
3.2.220222.52329	20230926_apagotto_AP14bis_FVII_1ul_all	3	20230921_080538	230920_EC1_apagotto_AP14bis_VII_Mpro_3.raw	2	36947	P08709	0.453	128	0	1.55098	30228830	24	True	True	1989.11	NCETHKDDQLICVNENGG	0	3	_NC[Carbamidomethyl (C)]ETHK[DimethLys0]DDQLIC[Carbamidomethyl (C)]VNENGG_	2	33.1746	167319
3.2.220222.52329	20230926_apagotto_AP14bis_FVII_1ul_all	3	20230921_080538	230920_EC1_apagotto_AP14bis_VII_Mpro_3.raw	2	36947	P08709	0.453	128	0	1.55098	30228830	24	True	True	5247.1	VAQVIIPSTYVPGTTNHDIALLRLHQPVVLTDHVVPLCLPERTFSER	0	5	_VAQVIIPSTYVPGTTNHDIALLRLHQPVVLTDHVVPLC[Carbamidomethyl (C)]LPERTFSER_	2	67.1529	0
3.2.220222.52329	20230926_apagotto_AP14bis_FVII_1ul_all	3	20230921_080538	230920_EC1_apagotto_AP14bis_VII_Mpro_3.raw	2	36947	P08709	0.453	128	0	1.55098	30228830	24	True	True	1189.41	VAQVIIPSTYV	0	2	_[DimethNter0]VAQVIIPSTYV_	1	58.6164	296705
3.2.220222.52329	20230926_apagotto_AP14bis_FVII_1ul_all	3	20230921_080538	230920_EC1_apagotto_AP14bis_VII_Mpro_3.raw	2	36947	P08709	0.453	128	0	1.55098	30228830	24	True	True	1448.73	EPRPGVLLRAPFP	0	3	_[DimethNter0]EPRPGVLLRAPFP_	1	58.0788	140610
3.2.220222.52329	20230926_apagotto_AP14bis_FVII_1ul_all	3	20230921_080538	230920_EC1_apagotto_AP14bis_VII_Mpro_3.raw	2	36947	P08709	0.453	128	0	1.55098	30228830	24	True	True	1079.25	LMTQDCLQQ	0	2	_LMTQDC[Carbamidomethyl (C)]LQQ_	1	33.4437	108264
3.2.220222.52329	20230926_apagotto_AP14bis_FVII_1ul_all	3	20230921_080538	230920_EC1_apagotto_AP14bis_VII_Mpro_3.raw	2	36947	P08709	0.453	128	0	1.55098	30228830	24	True	True	1800	SCRCHEGYSLLADGVSC	0	3	_SC[Carbamidomethyl (C)]RC[Carbamidomethyl (C)]HEGYSLLADGVSC[Carbamidomethyl (C)]_	1	42.5904	71835.9
3.2.220222.52329	20230926_apagotto_AP14bis_FVII_1ul_all	3	20230921_080538	230920_EC1_apagotto_AP14bis_VII_Mpro_3.raw	2	36947	P08709	0.453	128	0	1.55098	30228830	24	True	True	2670.88	DQLICVNENGGCEQYCSDHTGTKR	0	4	_[DimethNter0]DQLIC[Carbamidomethyl (C)]VNENGGC[Carbamidomethyl (C)]EQYC[Carbamidomethyl (C)]SDHTGTK[DimethLys0]R_	1	36.0149	14344.8

## Sheet: FVII_PRM_Skyline_output
Peptide	Protein	Replicate	Precursor Mz	Precursor Charge	Product Mz	Product Charge	Fragment Ion	Retention Time	Area	Background	Peak Rank	Isotope Label Type	Total Ion Current Area	Peptide Modified Sequence Three Letter Codes
LGGNEQVTR	peptides1	230927_EXP_IBC_ulianaf_EXT_05_01_20230928202804	487.257	2	860.422	1	y8	12.81	113708776	0	1	light	45739737088	LGGNEQVTR
LGGNEQVTR	peptides1	230927_EXP_IBC_ulianaf_EXT_05_02_20230928215838	487.257	2	860.422	1	y8	12.88	111708920	0	1	light	45441601536	LGGNEQVTR
LGGNEQVTR	peptides1	230927_EXP_IBC_ulianaf_EXT_05_03_20230928232900	487.257	2	860.422	1	y8	12.88	109869584	0	1	light	48493277184	LGGNEQVTR
LGGNEQVTR	peptides1	230927_EXP_IBC_ulianaf_EXT_05_05_20230929014031	487.257	2	860.422	1	y8	12.88	118917032	0	1	light	214264692736	LGGNEQVTR
LGGNEQVTR	peptides1	230927_EXP_IBC_ulianaf_EXT_05_06_20230929031052	487.257	2	860.422	1	y8	12.88	117178504	505697	1	light	233341435904	LGGNEQVTR
LGGNEQVTR	peptides1	230927_EXP_IBC_ulianaf_EXT_05_07_20230929044111	487.257	2	860.422	1	y8	12.95	118558248	0	1	light	243173457920	LGGNEQVTR
LGGNEQVTR	peptides1	230927_EXP_IBC_ulianaf_EXT_05_01_20230928202804	487.257	2	803.401	1	y7	12.81	35861436	0	2	light	45739737088	LGGNEQVTR
LGGNEQVTR	peptides1	230927_EXP_IBC_ulianaf_EXT_05_02_20230928215838	487.257	2	803.401	1	y7	12.88	33085214	0	2	light	45441601536	LGGNEQVTR
LGGNEQVTR	peptides1	230927_EXP_IBC_ulianaf_EXT_05_03_20230928232900	487.257	2	803.401	1	y7	12.88	28147482	0	2	light	48493277184	LGGNEQVTR
LGGNEQVTR	peptides1	230927_EXP_IBC_ulianaf_EXT_05_05_20230929014031	487.257	2	803.401	1	y7	12.88	29098402	0	2	light	214264692736	LGGNEQVTR
LGGNEQVTR	peptides1	230927_EXP_IBC_ulianaf_EXT_05_06_20230929031052	487.257	2	803.401	1	y7	12.88	32037416	156922	2	light	233341435904	LGGNEQVTR
LGGNEQVTR	peptides1	230927_EXP_IBC_ulianaf_EXT_05_07_20230929044111	487.257	2	803.401	1	y7	12.95	29098406	0	2	light	243173457920	LGGNEQVTR
LGGNEQVTR	peptides1	230927_EXP_IBC_ulianaf_EXT_05_01_20230928202804	487.257	2	746.379	1	y6	12.81	11671235	0	5	light	45739737088	LGGNEQVTR
LGGNEQVTR	peptides1	230927_EXP_IBC_ulianaf_EXT_05_02_20230928215838	487.257	2	746.379	1	y6	12.88	10241082	0	5	light	45441601536	LGGNEQVTR
LGGNEQVTR	peptides1	230927_EXP_IBC_ulianaf_EXT_05_03_20230928232900	487.257	2	746.379	1	y6	12.88	10501969	0	5	light	48493277184	LGGNEQVTR
LGGNEQVTR	peptides1	230927_EXP_IBC_ulianaf_EXT_05_05_20230929014031	487.257	2	746.379	1	y6	12.88	10890291	0	5	light	214264692736	LGGNEQVTR
LGGNEQVTR	peptides1	230927_EXP_IBC_ulianaf_EXT_05_06_20230929031052	487.257	2	746.379	1	y6	12.88	12433499	0	5	light	233341435904	LGGNEQVTR
LGGNEQVTR	peptides1	230927_EXP_IBC_ulianaf_EXT_05_07_20230929044111	487.257	2	746.379	1	y6	12.95	11254925	0	5	light	243173457920	LGGNEQVTR
LGGNEQVTR	peptides1	230927_EXP_IBC_ulianaf_EXT_05_01_20230928202804	487.257	2	632.336	1	y5	12.81	16256726	0	4	light	45739737088	LGGNEQVTR
LGGNEQVTR	peptides1	230927_EXP_IBC_ulianaf_EXT_05_02_20230928215838	487.257	2	632.336	1	y5	12.88	14140312	0	4	light	45441601536	LGGNEQVTR
LGGNEQVTR	peptides1	230927_EXP_IBC_ulianaf_EXT_05_03_20230928232900	487.257	2	632.336	1	y5	12.88	13451089	0	4	light	48493277184	LGGNEQVTR
LGGNEQVTR	peptides1	230927_EXP_IBC_ulianaf_EXT_05_05_20230929014031	487.257	2	632.336	1	y5	12.88	15124805	0	4	light	214264692736	LGGNEQVTR
LGGNEQVTR	peptides1	230927_EXP_IBC_ulianaf_EXT_05_06_20230929031052	487.257	2	632.336	1	y5	12.88	14938334	42089	4	light	233341435904	LGGNEQVTR
LGGNEQVTR	peptides1	230927_EXP_IBC_ulianaf_EXT_05_07_20230929044111	487.257	2	632.336	1	y5	12.95	14498735	0	4	light	243173457920	LGGNEQVTR
LGGNEQVTR	peptides1	230927_EXP_IBC_ulianaf_EXT_05_01_20230928202804	487.257	2	503.294	1	y4	12.81	25783462	0	3	light	45739737088	LGGNEQVTR
LGGNEQVTR	peptides1	230927_EXP_IBC_ulianaf_EXT_05_02_20230928215838	487.257	2	503.294	1	y4	12.88	25858172	0	3	light	45441601536	LGGNEQVTR
LGGNEQVTR	peptides1	230927_EXP_IBC_ulianaf_EXT_05_03_20230928232900	487.257	2	503.294	1	y4	12.88	24727954	0	3	light	48493277184	LGGNEQVTR
LGGNEQVTR	peptides1	230927_EXP_IBC_ulianaf_EXT_05_05_20230929014031	487.257	2	503.294	1	y4	12.88	26421834	0	3	light	214264692736	LGGNEQVTR
LGGNEQVTR	peptides1	230927_EXP_IBC_ulianaf_EXT_05_06_20230929031052	487.257	2	503.294	1	y4	12.88	27258694	64490	3	light	233341435904	LGGNEQVTR
LGGNEQVTR	peptides1	230927_EXP_IBC_ulianaf_EXT_05_07_20230929044111	487.257	2	503.294	1	y4	12.95	26978528	0	3	light	243173457920	LGGNEQVTR
LGGNEQVTR	peptides1	230927_EXP_IBC_ulianaf_EXT_05_01_20230928202804	487.257	2	599.278	1	b6	12.75	92215	0	6	light	45739737088	LGGNEQVTR
LGGNEQVTR	peptides1	230927_EXP_IBC_ulianaf_EXT_05_02_20230928215838	487.257	2	599.278	1	b6	12.68	0	0	0	light	45441601536	LGGNEQVTR
LGGNEQVTR	peptides1	230927_EXP_IBC_ulianaf_EXT_05_03_20230928232900	487.257	2	599.278	1	b6	12.75	17487	0	6	light	48493277184	LGGNEQVTR
LGGNEQVTR	peptides1	230927_EXP_IBC_ulianaf_EXT_05_05_20230929014031	487.257	2	599.278	1	b6	12.81	322849	0	6	light	214264692736	LGGNEQVTR
LGGNEQVTR	peptides1	230927_EXP_IBC_ulianaf_EXT_05_06_20230929031052	487.257	2	599.278	1	b6	12.88	515411	0	6	light	233341435904	LGGNEQVTR
LGGNEQVTR	peptides1	230927_EXP_IBC_ulianaf_EXT_05_07_20230929044111	487.257	2	599.278	1	b6	12.75	0	0	0	light	243173457920	LGGNEQVTR
LGGNEQVTR	peptides1	230927_EXP_IBC_ulianaf_EXT_05_01_20230928202804	487.257	2	698.347	1	b7	12.61	0	0	0	light	45739737088	LGGNEQVTR
LGGNEQVTR	peptides1	230927_EXP_IBC_ulianaf_EXT_05_02_20230928215838	487.257	2	698.347	1	b7	12.68	0	0	0	light	45441601536	LGGNEQVTR
LGGNEQVTR	peptides1	230927_EXP_IBC_ulianaf_EXT_05_03_20230928232900	487.257	2	698.347	1	b7	12.68	0	0	0	light	48493277184	LGGNEQVTR
LGGNEQVTR	peptides1	230927_EXP_IBC_ulianaf_EXT_05_05_20230929014031	487.257	2	698.347	1	b7	12.68	0	0	0	light	214264692736	LGGNEQVTR
LGGNEQVTR	peptides1	230927_EXP_IBC_ulianaf_EXT_05_06_20230929031052	487.257	2	698.347	1	b7	12.75	0	0	0	light	233341435904	LGGNEQVTR
LGGNEQVTR	peptides1	230927_EXP_IBC_ulianaf_EXT_05_07_20230929044111	487.257	2	698.347	1	b7	12.75	0	0	0	light	243173457920	LGGNEQVTR
LGGNEQVTR	peptides1	230927_EXP_IBC_ulianaf_EXT_05_01_20230928202804	487.257	2	799.394	1	b8	12.61	0	0	0	light	45739737088	LGGNEQVTR
LGGNEQVTR	peptides1	230927_EXP_IBC_ulianaf_EXT_05_02_20230928215838	487.257	2	799.394	1	b8	12.68	0	0	0	light	45441601536	LGGNEQVTR
LGGNEQVTR	peptides1	230927_EXP_IBC_ulianaf_EXT_05_03_20230928232900	487.257	2	799.394	1	b8	12.68	0	0	0	light	48493277184	LGGNEQVTR
LGGNEQVTR	peptides1	230927_EXP_IBC_ulianaf_EXT_05_05_20230929014031	487.257	2	799.394	1	b8	12.68	0	0	0	light	214264692736	LGGNEQVTR
LGGNEQVTR	peptides1	230927_EXP_IBC_ulianaf_EXT_05_06_20230929031052	487.257	2	799.394	1	b8	12.75	0	0	0	light	233341435904	LGGNEQVTR
LGGNEQVTR	peptides1	230927_EXP_IBC_ulianaf_EXT_05_07_20230929044111	487.257	2	799.394	1	b8	12.75	0	0	0	light	243173457920	LGGNEQVTR
GAGSSEPVTGLDAK	peptides1	230927_EXP_IBC_ulianaf_EXT_05_01_20230928202804	644.823	2	1160.58	1	y12	21.29	4519241	0	5	light	45739737088	GAGSSEPVTGLDAK
GAGSSEPVTGLDAK	peptides1	230927_EXP_IBC_ulianaf_EXT_05_02_20230928215838	644.823	2	1160.58	1	y12	21.35	4624802	42189	5	light	45441601536	GAGSSEPVTGLDAK
GAGSSEPVTGLDAK	peptides1	230927_EXP_IBC_ulianaf_EXT_05_03_20230928232900	644.823	2	1160.58	1	y12	21.35	4974092	0	5	light	48493277184	GAGSSEPVTGLDAK
GAGSSEPVTGLDAK	peptides1	230927_EXP_IBC_ulianaf_EXT_05_05_20230929014031	644.823	2	1160.58	1	y12	21.35	5296584	99717	5	light	214264692736	GAGSSEPVTGLDAK
GAGSSEPVTGLDAK	peptides1	230927_EXP_IBC_ulianaf_EXT_05_06_20230929031052	644.823	2	1160.58	1	y12	21.35	5596154	0	4	light	233341435904	GAGSSEPVTGLDAK
GAGSSEPVTGLDAK	peptides1	230927_EXP_IBC_ulianaf_EXT_05_07_20230929044111	644.823	2	1160.58	1	y12	21.42	5144492	61850	5	light	243173457920	GAGSSEPVTGLDAK
GAGSSEPVTGLDAK	peptides1	230927_EXP_IBC_ulianaf_EXT_05_01_20230928202804	644.823	2	1103.56	1	y11	21.29	2842821	0	6	light	45739737088	GAGSSEPVTGLDAK
GAGSSEPVTGLDAK	peptides1	230927_EXP_IBC_ulianaf_EXT_05_02_20230928215838	644.823	2	1103.56	1	y11	21.29	2729746	0	6	light	45441601536	GAGSSEPVTGLDAK
GAGSSEPVTGLDAK	peptides1	230927_EXP_IBC_ulianaf_EXT_05_03_20230928232900	644.823	2	1103.56	1	y11	21.35	3072552	0	6	light	48493277184	GAGSSEPVTGLDAK
GAGSSEPVTGLDAK	peptides1	230927_EXP_IBC_ulianaf_EXT_05_05_20230929014031	644.823	2	1103.56	1	y11	21.35	3395763	40996	6	light	214264692736	GAGSSEPVTGLDAK
GAGSSEPVTGLDAK	peptides1	230927_EXP_IBC_ulianaf_EXT_05_06_20230929031052	644.823	2	1103.56	1	y11	21.35	3198296	0	6	light	233341435904	GAGSSEPVTGLDAK
GAGSSEPVTGLDAK	peptides1	230927_EXP_IBC_ulianaf_EXT_05_07_20230929044111	644.823	2	1103.56	1	y11	21.42	2857226	37131	6	light	243173457920	GAGSSEPVTGLDAK
GAGSSEPVTGLDAK	peptides1	230927_EXP_IBC_ulianaf_EXT_05_01_20230928202804	644.823	2	1016.53	1	y10	21.29	10929359	27446	2	light	45739737088	GAGSSEPVTGLDAK
GAGSSEPVTGLDAK	peptides1	230927_EXP_IBC_ulianaf_EXT_05_02_20230928215838	644.823	2	1016.53	1	y10	21.35	10328667	115455	2	light	45441601536	GAGSSEPVTGLDAK
GAGSSEPVTGLDAK	peptides1	230927_EXP_IBC_ulianaf_EXT_05_03_20230928232900	644.823	2	1016.53	1	y10	21.35	11431549	0	2	light	48493277184	GAGSSEPVTGLDAK
GAGSSEPVTGLDAK	peptides1	230927_EXP_IBC_ulianaf_EXT_05_05_20230929014031	644.823	2	1016.53	1	y10	21.35	11763537	180393	2	light	214264692736	GAGSSEPVTGLDAK
GAGSSEPVTGLDAK	peptides1	230927_EXP_IBC_ulianaf_EXT_05_06_20230929031052	644.823	2	1016.53	1	y10	21.35	11898768	34399	2	light	233341435904	GAGSSEPVTGLDAK
GAGSSEPVTGLDAK	peptides1	230927_EXP_IBC_ulianaf_EXT_05_07_20230929044111	644.823	2	1016.53	1	y10	21.42	10735080	128722	2	light	243173457920	GAGSSEPVTGLDAK
GAGSSEPVTGLDAK	peptides1	230927_EXP_IBC_ulianaf_EXT_05_01_20230928202804	644.823	2	929.494	1	y9	21.29	7277962	0	3	light	45739737088	GAGSSEPVTGLDAK
GAGSSEPVTGLDAK	peptides1	230927_EXP_IBC_ulianaf_EXT_05_02_20230928215838	644.823	2	929.494	1	y9	21.35	7888864	57362	3	light	45441601536	GAGSSEPVTGLDAK
GAGSSEPVTGLDAK	peptides1	230927_EXP_IBC_ulianaf_EXT_05_03_20230928232900	644.823	2	929.494	1	y9	21.35	8709779	0	3	light	48493277184	GAGSSEPVTGLDAK
GAGSSEPVTGLDAK	peptides1	230927_EXP_IBC_ulianaf_EXT_05_05_20230929014031	644.823	2	929.494	1	y9	21.35	8036767	149857	3	light	214264692736	GAGSSEPVTGLDAK
GAGSSEPVTGLDAK	peptides1	230927_EXP_IBC_ulianaf_EXT_05_06_20230929031052	644.823	2	929.494	1	y9	21.35	8430925	0	3	light	233341435904	GAGSSEPVTGLDAK
GAGSSEPVTGLDAK	peptides1	230927_EXP_IBC_ulianaf_EXT_05_07_20230929044111	644.823	2	929.494	1	y9	21.42	7777307	90127	3	light	243173457920	GAGSSEPVTGLDAK
GAGSSEPVTGLDAK	peptides1	230927_EXP_IBC_ulianaf_EXT_05_01_20230928202804	644.823	2	800.451	1	y8	21.29	78356176	387389	1	light	45739737088	GAGSSEPVTGLDAK
GAGSSEPVTGLDAK	peptides1	230927_EXP_IBC_ulianaf_EXT_05_02_20230928215838	644.823	2	800.451	1	y8	21.35	78217320	619267	1	light	45441601536	GAGSSEPVTGLDAK
GAGSSEPVTGLDAK	peptides1	230927_EXP_IBC_ulianaf_EXT_05_03_20230928232900	644.823	2	800.451	1	y8	21.35	83102784	0	1	light	48493277184	GAGSSEPVTGLDAK
GAGSSEPVTGLDAK	peptides1	230927_EXP_IBC_ulianaf_EXT_05_05_20230929014031	644.823	2	800.451	1	y8	21.35	86153104	1489182	1	light	214264692736	GAGSSEPVTGLDAK
GAGSSEPVTGLDAK	peptides1	230927_EXP_IBC_ulianaf_EXT_05_06_20230929031052	644.823	2	800.451	1	y8	21.35	86329032	357616	1	light	233341435904	GAGSSEPVTGLDAK
GAGSSEPVTGLDAK	peptides1	230927_EXP_IBC_ulianaf_EXT_05_07_20230929044111	644.823	2	800.451	1	y8	21.42	80895880	1210018	1	light	243173457920	GAGSSEPVTGLDAK
GAGSSEPVTGLDAK	peptides1	230927_EXP_IBC_ulianaf_EXT_05_01_20230928202804	644.823	2	703.398	1	y7	21.29	5453630	0	4	light	45739737088	GAGSSEPVTGLDAK
GAGSSEPVTGLDAK	peptides1	230927_EXP_IBC_ulianaf_EXT_05_02_20230928215838	644.823	2	703.398	1	y7	21.29	5227018	27108	4	light	45441601536	GAGSSEPVTGLDAK
GAGSSEPVTGLDAK	peptides1	230927_EXP_IBC_ulianaf_EXT_05_03_20230928232900	644.823	2	703.398	1	y7	21.35	5762222	0	4	light	48493277184	GAGSSEPVTGLDAK
GAGSSEPVTGLDAK	peptides1	230927_EXP_IBC_ulianaf_EXT_05_05_20230929014031	644.823	2	703.398	1	y7	21.35	5558240	97412	4	light	214264692736	GAGSSEPVTGLDAK
GAGSSEPVTGLDAK	peptides1	230927_EXP_IBC_ulianaf_EXT_05_06_20230929031052	644.823	2	703.398	1	y7	21.35	5066230	0	5	light	233341435904	GAGSSEPVTGLDAK
GAGSSEPVTGLDAK	peptides1	230927_EXP_IBC_ulianaf_EXT_05_07_20230929044111	644.823	2	703.398	1	y7	21.42	5486992	58905	4	light	243173457920	GAGSSEPVTGLDAK
GAGSSEPVTGLDAK	peptides1	230927_EXP_IBC_ulianaf_EXT_05_01_20230928202804	644.823	2	489.194	1	b6	21.29	1648203	0	7	light	45739737088	GAGSSEPVTGLDAK
GAGSSEPVTGLDAK	peptides1	230927_EXP_IBC_ulianaf_EXT_05_02_20230928215838	644.823	2	489.194	1	b6	21.35	1715544	0	7	light	45441601536	GAGSSEPVTGLDAK
GAGSSEPVTGLDAK	peptides1	230927_EXP_IBC_ulianaf_EXT_05_03_20230928232900	644.823	2	489.194	1	b6	21.35	1351119	0	7	light	48493277184	GAGSSEPVTGLDAK
GAGSSEPVTGLDAK	peptides1	230927_EXP_IBC_ulianaf_EXT_05_05_20230929014031	644.823	2	489.194	1	b6	21.35	1786635	21575	7	light	214264692736	GAGSSEPVTGLDAK
GAGSSEPVTGLDAK	peptides1	230927_EXP_IBC_ulianaf_EXT_05_06_20230929031052	644.823	2	489.194	1	b6	21.42	1503799	0	7	light	233341435904	GAGSSEPVTGLDAK
GAGSSEPVTGLDAK	peptides1	230927_EXP_IBC_ulianaf_EXT_05_07_20230929044111	644.823	2	489.194	1	b6	21.42	1831843	20285	7	light	243173457920	GAGSSEPVTGLDAK
GAGSSEPVTGLDAK	peptides1	230927_EXP_IBC_ulianaf_EXT_05_01_20230928202804	644.823	2	685.315	1	b8	21.29	304570	0	9	light	45739737088	GAGSSEPVTGLDAK
GAGSSEPVTGLDAK	peptides1	230927_EXP_IBC_ulianaf_EXT_05_02_20230928215838	644.823	2	685.315	1	b8	21.35	581559	0	8	light	45441601536	GAGSSEPVTGLDAK
GAGSSEPVTGLDAK	peptides1	230927_EXP_IBC_ulianaf_EXT_05_03_20230928232900	644.823	2	685.315	1	b8	21.35	246777	0	8	light	48493277184	GAGSSEPVTGLDAK
GAGSSEPVTGLDAK	peptides1	230927_EXP_IBC_ulianaf_EXT_05_05_20230929014031	644.823	2	685.315	1	b8	21.29	106499	0	9	light	214264692736	GAGSSEPVTGLDAK
GAGSSEPVTGLDAK	peptides1	230927_EXP_IBC_ulianaf_EXT_05_06_20230929031052	644.823	2	685.315	1	b8	21.42	365831	0	8	light	233341435904	GAGSSEPVTGLDAK
GAGSSEPVTGLDAK	peptides1	230927_EXP_IBC_ulianaf_EXT_05_07_20230929044111	644.823	2	685.315	1	b8	21.42	294738	0	9	light	243173457920	GAGSSEPVTGLDAK
GAGSSEPVTGLDAK	peptides1	230927_EXP_IBC_ulianaf_EXT_05_01_20230928202804	644.823	2	786.363	1	b9	21.15	0	0	0	light	45739737088	GAGSSEPVTGLDAK
GAGSSEPVTGLDAK	peptides1	230927_EXP_IBC_ulianaf_EXT_05_02_20230928215838	644.823	2	786.363	1	b9	21.22	30674	0	10	light	45441601536	GAGSSEPVTGLDAK
GAGSSEPVTGLDAK	peptides1	230927_EXP_IBC_ulianaf_EXT_05_03_20230928232900	644.823	2	786.363	1	b9	21.08	0	0	0	light	48493277184	GAGSSEPVTGLDAK
GAGSSEPVTGLDAK	peptides1	230927_EXP_IBC_ulianaf_EXT_05_05_20230929014031	644.823	2	786.363	1	b9	21.15	0	0	0	light	214264692736	GAGSSEPVTGLDAK
GAGSSEPVTGLDAK	peptides1	230927_EXP_IBC_ulianaf_EXT_05_06_20230929031052	644.823	2	786.363	1	b9	21.35	219092	0	10	light	233341435904	GAGSSEPVTGLDAK
GAGSSEPVTGLDAK	peptides1	230927_EXP_IBC_ulianaf_EXT_05_07_20230929044111	644.823	2	786.363	1	b9	21.22	0	0	0	light	243173457920	GAGSSEPVTGLDAK
GAGSSEPVTGLDAK	peptides1	230927_EXP_IBC_ulianaf_EXT_05_01_20230928202804	644.823	2	843.384	1	b10	21.15	0	0	0	light	45739737088	GAGSSEPVTGLDAK
GAGSSEPVTGLDAK	peptides1	230927_EXP_IBC_ulianaf_EXT_05_02_20230928215838	644.823	2	843.384	1	b10	21.15	0	0	0	light	45441601536	GAGSSEPVTGLDAK
GAGSSEPVTGLDAK	peptides1	230927_EXP_IBC_ulianaf_EXT_05_03_20230928232900	644.823	2	843.384	1	b10	21.08	0	0	0	light	48493277184	GAGSSEPVTGLDAK
GAGSSEPVTGLDAK	peptides1	230927_EXP_IBC_ulianaf_EXT_05_05_20230929014031	644.823	2	843.384	1	b10	21.15	0	0	0	light	214264692736	GAGSSEPVTGLDAK
GAGSSEPVTGLDAK	peptides1	230927_EXP_IBC_ulianaf_EXT_05_06_20230929031052	644.823	2	843.384	1	b10	21.15	0	0	0	light	233341435904	GAGSSEPVTGLDAK
GAGSSEPVTGLDAK	peptides1	230927_EXP_IBC_ulianaf_EXT_05_07_20230929044111	644.823	2	843.384	1	b10	21.22	0	0	0	light	243173457920	GAGSSEPVTGLDAK
GAGSSEPVTGLDAK	peptides1	230927_EXP_IBC_ulianaf_EXT_05_01_20230928202804	644.823	2	956.468	1	b11	21.15	0	0	0	light	45739737088	GAGSSEPVTGLDAK
GAGSSEPVTGLDAK	peptides1	230927_EXP_IBC_ulianaf_EXT_05_02_20230928215838	644.823	2	956.468	1	b11	21.15	0	0	0	light	45441601536	GAGSSEPVTGLDAK
GAGSSEPVTGLDAK	peptides1	230927_EXP_IBC_ulianaf_EXT_05_03_20230928232900	644.823	2	956.468	1	b11	21.08	0	0	0	light	48493277184	GAGSSEPVTGLDAK
GAGSSEPVTGLDAK	peptides1	230927_EXP_IBC_ulianaf_EXT_05_05_20230929014031	644.823	2	956.468	1	b11	21.42	12289	0	10	light	214264692736	GAGSSEPVTGLDAK
GAGSSEPVTGLDAK	peptides1	230927_EXP_IBC_ulianaf_EXT_05_06_20230929031052	644.823	2	956.468	1	b11	21.42	189983	0	11	light	233341435904	GAGSSEPVTGLDAK
GAGSSEPVTGLDAK	peptides1	230927_EXP_IBC_ulianaf_EXT_05_07_20230929044111	644.823	2	956.468	1	b11	21.49	65833	0	10	light	243173457920	GAGSSEPVTGLDAK
GAGSSEPVTGLDAK	peptides1	230927_EXP_IBC_ulianaf_EXT_05_01_20230928202804	644.823	2	1071.5	1	b12	21.15	0	0	0	light	45739737088	GAGSSEPVTGLDAK
GAGSSEPVTGLDAK	peptides1	230927_EXP_IBC_ulianaf_EXT_05_02_20230928215838	644.823	2	1071.5	1	b12	21.15	0	0	0	light	45441601536	GAGSSEPVTGLDAK
GAGSSEPVTGLDAK	peptides1	230927_EXP_IBC_ulianaf_EXT_05_03_20230928232900	644.823	2	1071.5	1	b12	21.08	0	0	0	light	48493277184	GAGSSEPVTGLDAK
GAGSSEPVTGLDAK	peptides1	230927_EXP_IBC_ulianaf_EXT_05_05_20230929014031	644.823	2	1071.5	1	b12	21.15	0	0	0	light	214264692736	GAGSSEPVTGLDAK
GAGSSEPVTGLDAK	peptides1	230927_EXP_IBC_ulianaf_EXT_05_06_20230929031052	644.823	2	1071.5	1	b12	21.15	0	0	0	light	233341435904	GAGSSEPVTGLDAK
GAGSSEPVTGLDAK	peptides1	230927_EXP_IBC_ulianaf_EXT_05_07_20230929044111	644.823	2	1071.5	1	b12	21.22	0	0	0	light	243173457920	GAGSSEPVTGLDAK
GAGSSEPVTGLDAK	peptides1	230927_EXP_IBC_ulianaf_EXT_05_01_20230928202804	644.823	2	1142.53	1	b13	21.29	353696	0	8	light	45739737088	GAGSSEPVTGLDAK
GAGSSEPVTGLDAK	peptides1	230927_EXP_IBC_ulianaf_EXT_05_02_20230928215838	644.823	2	1142.53	1	b13	21.35	262109	0	9	light	45441601536	GAGSSEPVTGLDAK
GAGSSEPVTGLDAK	peptides1	230927_EXP_IBC_ulianaf_EXT_05_03_20230928232900	644.823	2	1142.53	1	b13	21.42	196674	0	9	light	48493277184	GAGSSEPVTGLDAK
GAGSSEPVTGLDAK	peptides1	230927_EXP_IBC_ulianaf_EXT_05_05_20230929014031	644.823	2	1142.53	1	b13	21.35	450121	0	8	light	214264692736	GAGSSEPVTGLDAK
GAGSSEPVTGLDAK	peptides1	230927_EXP_IBC_ulianaf_EXT_05_06_20230929031052	644.823	2	1142.53	1	b13	21.42	226379	0	9	light	233341435904	GAGSSEPVTGLDAK
GAGSSEPVTGLDAK	peptides1	230927_EXP_IBC_ulianaf_EXT_05_07_20230929044111	644.823	2	1142.53	1	b13	21.42	341721	0	8	light	243173457920	GAGSSEPVTGLDAK
VEATFGVDESNAK	peptides1	230927_EXP_IBC_ulianaf_EXT_05_01_20230928202804	683.828	2	1267.58	1	y12	24.71	7231138	2126315	7	light	45739737088	VEATFGVDESNAK
VEATFGVDESNAK	peptides1	230927_EXP_IBC_ulianaf_EXT_05_02_20230928215838	683.828	2	1267.58	1	y12	24.78	7720609	0	7	light	45441601536	VEATFGVDESNAK
VEATFGVDESNAK	peptides1	230927_EXP_IBC_ulianaf_EXT_05_03_20230928232900	683.828	2	1267.58	1	y12	24.77	7602067	0	7	light	48493277184	VEATFGVDESNAK
VEATFGVDESNAK	peptides1	230927_EXP_IBC_ulianaf_EXT_05_05_20230929014031	683.828	2	1267.58	1	y12	24.74	9285320	87556	7	light	214264692736	VEATFGVDESNAK
VEATFGVDESNAK	peptides1	230927_EXP_IBC_ulianaf_EXT_05_06_20230929031052	683.828	2	1267.58	1	y12	24.8	8743921	0	7	light	233341435904	VEATFGVDESNAK
VEATFGVDESNAK	peptides1	230927_EXP_IBC_ulianaf_EXT_05_07_20230929044111	683.828	2	1267.58	1	y12	24.88	7323216	41584	7	light	243173457920	VEATFGVDESNAK
VEATFGVDESNAK	peptides1	230927_EXP_IBC_ulianaf_EXT_05_01_20230928202804	683.828	2	1138.54	1	y11	24.71	54233652	13339552	4	light	45739737088	VEATFGVDESNAK
VEATFGVDESNAK	peptides1	230927_EXP_IBC_ulianaf_EXT_05_02_20230928215838	683.828	2	1138.54	1	y11	24.77	61037444	206985	4	light	45441601536	VEATFGVDESNAK
VEATFGVDESNAK	peptides1	230927_EXP_IBC_ulianaf_EXT_05_03_20230928232900	683.828	2	1138.54	1	y11	24.77	51370612	0	4	light	48493277184	VEATFGVDESNAK
VEATFGVDESNAK	peptides1	230927_EXP_IBC_ulianaf_EXT_05_05_20230929014031	683.828	2	1138.54	1	y11	24.75	62884320	648701	4	light	214264692736	VEATFGVDESNAK
VEATFGVDESNAK	peptides1	230927_EXP_IBC_ulianaf_EXT_05_06_20230929031052	683.828	2	1138.54	1	y11	24.81	61462344	130501	4	light	233341435904	VEATFGVDESNAK
VEATFGVDESNAK	peptides1	230927_EXP_IBC_ulianaf_EXT_05_07_20230929044111	683.828	2	1138.54	1	y11	24.88	51318812	838389	4	light	243173457920	VEATFGVDESNAK
VEATFGVDESNAK	peptides1	230927_EXP_IBC_ulianaf_EXT_05_01_20230928202804	683.828	2	1067.5	1	y10	24.71	41068232	10260519	5	light	45739737088	VEATFGVDESNAK
VEATFGVDESNAK	peptides1	230927_EXP_IBC_ulianaf_EXT_05_02_20230928215838	683.828	2	1067.5	1	y10	24.78	44254376	188956	5	light	45441601536	VEATFGVDESNAK
VEATFGVDESNAK	peptides1	230927_EXP_IBC_ulianaf_EXT_05_03_20230928232900	683.828	2	1067.5	1	y10	24.78	36750880	0	5	light	48493277184	VEATFGVDESNAK
VEATFGVDESNAK	peptides1	230927_EXP_IBC_ulianaf_EXT_05_05_20230929014031	683.828	2	1067.5	1	y10	24.75	44892744	507539	5	light	214264692736	VEATFGVDESNAK
VEATFGVDESNAK	peptides1	230927_EXP_IBC_ulianaf_EXT_05_06_20230929031052	683.828	2	1067.5	1	y10	24.81	45902160	124418	5	light	233341435904	VEATFGVDESNAK
VEATFGVDESNAK	peptides1	230927_EXP_IBC_ulianaf_EXT_05_07_20230929044111	683.828	2	1067.5	1	y10	24.88	37176500	603463	5	light	243173457920	VEATFGVDESNAK
VEATFGVDESNAK	peptides1	230927_EXP_IBC_ulianaf_EXT_05_01_20230928202804	683.828	2	966.453	1	y9	24.71	60197220	15044499	3	light	45739737088	VEATFGVDESNAK
VEATFGVDESNAK	peptides1	230927_EXP_IBC_ulianaf_EXT_05_02_20230928215838	683.828	2	966.453	1	y9	24.78	70483392	198516	3	light	45441601536	VEATFGVDESNAK
VEATFGVDESNAK	peptides1	230927_EXP_IBC_ulianaf_EXT_05_03_20230928232900	683.828	2	966.453	1	y9	24.78	56762188	68384	3	light	48493277184	VEATFGVDESNAK
VEATFGVDESNAK	peptides1	230927_EXP_IBC_ulianaf_EXT_05_05_20230929014031	683.828	2	966.453	1	y9	24.75	72416240	680493	3	light	214264692736	VEATFGVDESNAK
VEATFGVDESNAK	peptides1	230927_EXP_IBC_ulianaf_EXT_05_06_20230929031052	683.828	2	966.453	1	y9	24.81	70018864	243757	3	light	233341435904	VEATFGVDESNAK
VEATFGVDESNAK	peptides1	230927_EXP_IBC_ulianaf_EXT_05_07_20230929044111	683.828	2	966.453	1	y9	24.88	59192228	789955	3	light	243173457920	VEATFGVDESNAK
VEATFGVDESNAK	peptides1	230927_EXP_IBC_ulianaf_EXT_05_01_20230928202804	683.828	2	819.384	1	y8	24.71	107410672	28193740	1	light	45739737088	VEATFGVDESNAK
VEATFGVDESNAK	peptides1	230927_EXP_IBC_ulianaf_EXT_05_02_20230928215838	683.828	2	819.384	1	y8	24.77	121602000	502473	2	light	45441601536	VEATFGVDESNAK
VEATFGVDESNAK	peptides1	230927_EXP_IBC_ulianaf_EXT_05_03_20230928232900	683.828	2	819.384	1	y8	24.77	104793256	75920	1	light	48493277184	VEATFGVDESNAK
VEATFGVDESNAK	peptides1	230927_EXP_IBC_ulianaf_EXT_05_05_20230929014031	683.828	2	819.384	1	y8	24.75	127303080	1364332	2	light	214264692736	VEATFGVDESNAK
VEATFGVDESNAK	peptides1	230927_EXP_IBC_ulianaf_EXT_05_06_20230929031052	683.828	2	819.384	1	y8	24.8	114810408	170613	2	light	233341435904	VEATFGVDESNAK
VEATFGVDESNAK	peptides1	230927_EXP_IBC_ulianaf_EXT_05_07_20230929044111	683.828	2	819.384	1	y8	24.88	100325696	1618161	2	light	243173457920	VEATFGVDESNAK
VEATFGVDESNAK	peptides1	230927_EXP_IBC_ulianaf_EXT_05_01_20230928202804	683.828	2	762.363	1	y7	24.71	21486452	5283589	6	light	45739737088	VEATFGVDESNAK
VEATFGVDESNAK	peptides1	230927_EXP_IBC_ulianaf_EXT_05_02_20230928215838	683.828	2	762.363	1	y7	24.77	23956986	0	6	light	45441601536	VEATFGVDESNAK
VEATFGVDESNAK	peptides1	230927_EXP_IBC_ulianaf_EXT_05_03_20230928232900	683.828	2	762.363	1	y7	24.78	20379248	0	6	light	48493277184	VEATFGVDESNAK
VEATFGVDESNAK	peptides1	230927_EXP_IBC_ulianaf_EXT_05_05_20230929014031	683.828	2	762.363	1	y7	24.75	24225944	267055	6	light	214264692736	VEATFGVDESNAK
VEATFGVDESNAK	peptides1	230927_EXP_IBC_ulianaf_EXT_05_06_20230929031052	683.828	2	762.363	1	y7	24.81	24184624	79299	6	light	233341435904	VEATFGVDESNAK
VEATFGVDESNAK	peptides1	230927_EXP_IBC_ulianaf_EXT_05_07_20230929044111	683.828	2	762.363	1	y7	24.88	19857188	213082	6	light	243173457920	VEATFGVDESNAK
VEATFGVDESNAK	peptides1	230927_EXP_IBC_ulianaf_EXT_05_01_20230928202804	683.828	2	704.361	1	b7	24.63	0	0	0	light	45739737088	VEATFGVDESNAK
VEATFGVDESNAK	peptides1	230927_EXP_IBC_ulianaf_EXT_05_02_20230928215838	683.828	2	704.361	1	b7	24.56	0	0	0	light	45441601536	VEATFGVDESNAK
VEATFGVDESNAK	peptides1	230927_EXP_IBC_ulianaf_EXT_05_03_20230928232900	683.828	2	704.361	1	b7	24.56	0	0	0	light	48493277184	VEATFGVDESNAK
VEATFGVDESNAK	peptides1	230927_EXP_IBC_ulianaf_EXT_05_05_20230929014031	683.828	2	704.361	1	b7	24.57	0	0	0	light	214264692736	VEATFGVDESNAK
VEATFGVDESNAK	peptides1	230927_EXP_IBC_ulianaf_EXT_05_06_20230929031052	683.828	2	704.361	1	b7	24.6	0	0	0	light	233341435904	VEATFGVDESNAK
VEATFGVDESNAK	peptides1	230927_EXP_IBC_ulianaf_EXT_05_07_20230929044111	683.828	2	704.361	1	b7	24.68	0	0	0	light	243173457920	VEATFGVDESNAK
VEATFGVDESNAK	peptides1	230927_EXP_IBC_ulianaf_EXT_05_01_20230928202804	683.828	2	819.388	1	b8	24.71	107410672	28193740	2	light	45739737088	VEATFGVDESNAK
VEATFGVDESNAK	peptides1	230927_EXP_IBC_ulianaf_EXT_05_02_20230928215838	683.828	2	819.388	1	b8	24.77	126693240	505467	1	light	45441601536	VEATFGVDESNAK
VEATFGVDESNAK	peptides1	230927_EXP_IBC_ulianaf_EXT_05_03_20230928232900	683.828	2	819.388	1	b8	24.77	104776584	96416	2	light	48493277184	VEATFGVDESNAK
VEATFGVDESNAK	peptides1	230927_EXP_IBC_ulianaf_EXT_05_05_20230929014031	683.828	2	819.388	1	b8	24.75	130249432	1364332	1	light	214264692736	VEATFGVDESNAK
VEATFGVDESNAK	peptides1	230927_EXP_IBC_ulianaf_EXT_05_06_20230929031052	683.828	2	819.388	1	b8	24.81	127268168	236085	1	light	233341435904	VEATFGVDESNAK
VEATFGVDESNAK	peptides1	230927_EXP_IBC_ulianaf_EXT_05_07_20230929044111	683.828	2	819.388	1	b8	24.88	105782456	1618161	1	light	243173457920	VEATFGVDESNAK
VEATFGVDESNAK	peptides1	230927_EXP_IBC_ulianaf_EXT_05_01_20230928202804	683.828	2	948.431	1	b9	24.71	3067971	516419	8	light	45739737088	VEATFGVDESNAK
VEATFGVDESNAK	peptides1	230927_EXP_IBC_ulianaf_EXT_05_02_20230928215838	683.828	2	948.431	1	b9	24.77	3711115	0	8	light	45441601536	VEATFGVDESNAK
VEATFGVDESNAK	peptides1	230927_EXP_IBC_ulianaf_EXT_05_03_20230928232900	683.828	2	948.431	1	b9	24.78	2655844	0	8	light	48493277184	VEATFGVDESNAK
VEATFGVDESNAK	peptides1	230927_EXP_IBC_ulianaf_EXT_05_05_20230929014031	683.828	2	948.431	1	b9	24.75	3174866	47711	8	light	214264692736	VEATFGVDESNAK
VEATFGVDESNAK	peptides1	230927_EXP_IBC_ulianaf_EXT_05_06_20230929031052	683.828	2	948.431	1	b9	24.8	2799651	0	8	light	233341435904	VEATFGVDESNAK
VEATFGVDESNAK	peptides1	230927_EXP_IBC_ulianaf_EXT_05_07_20230929044111	683.828	2	948.431	1	b9	24.88	2834626	0	8	light	243173457920	VEATFGVDESNAK
VEATFGVDESNAK	peptides1	230927_EXP_IBC_ulianaf_EXT_05_01_20230928202804	683.828	2	1035.46	1	b10	24.63	0	0	0	light	45739737088	VEATFGVDESNAK
VEATFGVDESNAK	peptides1	230927_EXP_IBC_ulianaf_EXT_05_02_20230928215838	683.828	2	1035.46	1	b10	24.56	0	0	0	light	45441601536	VEATFGVDESNAK
VEATFGVDESNAK	peptides1	230927_EXP_IBC_ulianaf_EXT_05_03_20230928232900	683.828	2	1035.46	1	b10	24.56	0	0	0	light	48493277184	VEATFGVDESNAK
VEATFGVDESNAK	peptides1	230927_EXP_IBC_ulianaf_EXT_05_05_20230929014031	683.828	2	1035.46	1	b10	24.57	0	0	0	light	214264692736	VEATFGVDESNAK
VEATFGVDESNAK	peptides1	230927_EXP_IBC_ulianaf_EXT_05_06_20230929031052	683.828	2	1035.46	1	b10	24.6	21	0	9	light	233341435904	VEATFGVDESNAK
VEATFGVDESNAK	peptides1	230927_EXP_IBC_ulianaf_EXT_05_07_20230929044111	683.828	2	1035.46	1	b10	24.68	0	0	0	light	243173457920	VEATFGVDESNAK
VEATFGVDESNAK	peptides1	230927_EXP_IBC_ulianaf_EXT_05_01_20230928202804	683.828	2	1149.51	1	b11	24.63	0	0	0	light	45739737088	VEATFGVDESNAK
VEATFGVDESNAK	peptides1	230927_EXP_IBC_ulianaf_EXT_05_02_20230928215838	683.828	2	1149.51	1	b11	24.56	0	0	0	light	45441601536	VEATFGVDESNAK
VEATFGVDESNAK	peptides1	230927_EXP_IBC_ulianaf_EXT_05_03_20230928232900	683.828	2	1149.51	1	b11	24.56	0	0	0	light	48493277184	VEATFGVDESNAK
VEATFGVDESNAK	peptides1	230927_EXP_IBC_ulianaf_EXT_05_05_20230929014031	683.828	2	1149.51	1	b11	24.57	0	0	0	light	214264692736	VEATFGVDESNAK
VEATFGVDESNAK	peptides1	230927_EXP_IBC_ulianaf_EXT_05_06_20230929031052	683.828	2	1149.51	1	b11	24.6	0	0	0	light	233341435904	VEATFGVDESNAK
VEATFGVDESNAK	peptides1	230927_EXP_IBC_ulianaf_EXT_05_07_20230929044111	683.828	2	1149.51	1	b11	24.68	0	0	0	light	243173457920	VEATFGVDESNAK
VEATFGVDESNAK	peptides1	230927_EXP_IBC_ulianaf_EXT_05_01_20230928202804	683.828	2	1220.54	1	b12	24.63	0	0	0	light	45739737088	VEATFGVDESNAK
VEATFGVDESNAK	peptides1	230927_EXP_IBC_ulianaf_EXT_05_02_20230928215838	683.828	2	1220.54	1	b12	24.56	0	0	0	light	45441601536	VEATFGVDESNAK
VEATFGVDESNAK	peptides1	230927_EXP_IBC_ulianaf_EXT_05_03_20230928232900	683.828	2	1220.54	1	b12	24.56	0	0	0	light	48493277184	VEATFGVDESNAK
VEATFGVDESNAK	peptides1	230927_EXP_IBC_ulianaf_EXT_05_05_20230929014031	683.828	2	1220.54	1	b12	24.57	0	0	0	light	214264692736	VEATFGVDESNAK
VEATFGVDESNAK	peptides1	230927_EXP_IBC_ulianaf_EXT_05_06_20230929031052	683.828	2	1220.54	1	b12	24.6	0	0	0	light	233341435904	VEATFGVDESNAK
VEATFGVDESNAK	peptides1	230927_EXP_IBC_ulianaf_EXT_05_07_20230929044111	683.828	2	1220.54	1	b12	24.68	0	0	0	light	243173457920	VEATFGVDESNAK
YILAGVENSK	peptides1	230927_EXP_IBC_ulianaf_EXT_05_01_20230928202804	547.298	2	930.525	1	y9	27.49	4558233	0	5	light	45739737088	YILAGVENSK
YILAGVENSK	peptides1	230927_EXP_IBC_ulianaf_EXT_05_02_20230928215838	547.298	2	930.525	1	y9	27.56	4708662	0	5	light	45441601536	YILAGVENSK
YILAGVENSK	peptides1	230927_EXP_IBC_ulianaf_EXT_05_03_20230928232900	547.298	2	930.525	1	y9	27.62	5711085	0	5	light	48493277184	YILAGVENSK
YILAGVENSK	peptides1	230927_EXP_IBC_ulianaf_EXT_05_05_20230929014031	547.298	2	930.525	1	y9	27.62	5135036	0	5	light	214264692736	YILAGVENSK
YILAGVENSK	peptides1	230927_EXP_IBC_ulianaf_EXT_05_06_20230929031052	547.298	2	930.525	1	y9	27.62	5419987	0	5	light	233341435904	YILAGVENSK
YILAGVENSK	peptides1	230927_EXP_IBC_ulianaf_EXT_05_07_20230929044111	547.298	2	930.525	1	y9	27.69	4647065	0	5	light	243173457920	YILAGVENSK
YILAGVENSK	peptides1	230927_EXP_IBC_ulianaf_EXT_05_01_20230928202804	547.298	2	817.441	1	y8	27.49	59607488	350945	1	light	45739737088	YILAGVENSK
YILAGVENSK	peptides1	230927_EXP_IBC_ulianaf_EXT_05_02_20230928215838	547.298	2	817.441	1	y8	27.56	57997352	567949	1	light	45441601536	YILAGVENSK
YILAGVENSK	peptides1	230927_EXP_IBC_ulianaf_EXT_05_03_20230928232900	547.298	2	817.441	1	y8	27.62	66106216	178873	1	light	48493277184	YILAGVENSK
YILAGVENSK	peptides1	230927_EXP_IBC_ulianaf_EXT_05_05_20230929014031	547.298	2	817.441	1	y8	27.56	73103072	46189	1	light	214264692736	YILAGVENSK
YILAGVENSK	peptides1	230927_EXP_IBC_ulianaf_EXT_05_06_20230929031052	547.298	2	817.441	1	y8	27.62	67246296	96343	1	light	233341435904	YILAGVENSK
YILAGVENSK	peptides1	230927_EXP_IBC_ulianaf_EXT_05_07_20230929044111	547.298	2	817.441	1	y8	27.69	69461432	0	1	light	243173457920	YILAGVENSK
YILAGVENSK	peptides1	230927_EXP_IBC_ulianaf_EXT_05_01_20230928202804	547.298	2	704.357	1	y7	27.49	41054856	173604	2	light	45739737088	YILAGVENSK
YILAGVENSK	peptides1	230927_EXP_IBC_ulianaf_EXT_05_02_20230928215838	547.298	2	704.357	1	y7	27.56	39513988	235983	3	light	45441601536	YILAGVENSK
YILAGVENSK	peptides1	230927_EXP_IBC_ulianaf_EXT_05_03_20230928232900	547.298	2	704.357	1	y7	27.62	44149128	186442	2	light	48493277184	YILAGVENSK
YILAGVENSK	peptides1	230927_EXP_IBC_ulianaf_EXT_05_05_20230929014031	547.298	2	704.357	1	y7	27.56	50523648	0	2	light	214264692736	YILAGVENSK
YILAGVENSK	peptides1	230927_EXP_IBC_ulianaf_EXT_05_06_20230929031052	547.298	2	704.357	1	y7	27.62	44367624	0	3	light	233341435904	YILAGVENSK
YILAGVENSK	peptides1	230927_EXP_IBC_ulianaf_EXT_05_07_20230929044111	547.298	2	704.357	1	y7	27.69	47062932	0	2	light	243173457920	YILAGVENSK
YILAGVENSK	peptides1	230927_EXP_IBC_ulianaf_EXT_05_01_20230928202804	547.298	2	633.32	1	y6	27.49	40206228	171298	3	light	45739737088	YILAGVENSK
YILAGVENSK	peptides1	230927_EXP_IBC_ulianaf_EXT_05_02_20230928215838	547.298	2	633.32	1	y6	27.56	44650528	167282	2	light	45441601536	YILAGVENSK
YILAGVENSK	peptides1	230927_EXP_IBC_ulianaf_EXT_05_03_20230928232900	547.298	2	633.32	1	y6	27.62	43460044	156828	3	light	48493277184	YILAGVENSK
YILAGVENSK	peptides1	230927_EXP_IBC_ulianaf_EXT_05_05_20230929014031	547.298	2	633.32	1	y6	27.62	40343924	0	3	light	214264692736	YILAGVENSK
YILAGVENSK	peptides1	230927_EXP_IBC_ulianaf_EXT_05_06_20230929031052	547.298	2	633.32	1	y6	27.62	49468164	0	2	light	233341435904	YILAGVENSK
YILAGVENSK	peptides1	230927_EXP_IBC_ulianaf_EXT_05_07_20230929044111	547.298	2	633.32	1	y6	27.69	36433408	0	3	light	243173457920	YILAGVENSK
YILAGVENSK	peptides1	230927_EXP_IBC_ulianaf_EXT_05_01_20230928202804	547.298	2	576.299	1	y5	27.49	5538223	0	4	light	45739737088	YILAGVENSK
YILAGVENSK	peptides1	230927_EXP_IBC_ulianaf_EXT_05_02_20230928215838	547.298	2	576.299	1	y5	27.56	5797244	0	4	light	45441601536	YILAGVENSK
YILAGVENSK	peptides1	230927_EXP_IBC_ulianaf_EXT_05_03_20230928232900	547.298	2	576.299	1	y5	27.62	6303856	0	4	light	48493277184	YILAGVENSK
YILAGVENSK	peptides1	230927_EXP_IBC_ulianaf_EXT_05_05_20230929014031	547.298	2	576.299	1	y5	27.62	6317071	0	4	light	214264692736	YILAGVENSK
YILAGVENSK	peptides1	230927_EXP_IBC_ulianaf_EXT_05_06_20230929031052	547.298	2	576.299	1	y5	27.62	6999302	0	4	light	233341435904	YILAGVENSK
YILAGVENSK	peptides1	230927_EXP_IBC_ulianaf_EXT_05_07_20230929044111	547.298	2	576.299	1	y5	27.69	5942357	0	4	light	243173457920	YILAGVENSK
YILAGVENSK	peptides1	230927_EXP_IBC_ulianaf_EXT_05_01_20230928202804	547.298	2	617.366	1	b6	27.09	0	0	0	light	45739737088	YILAGVENSK
YILAGVENSK	peptides1	230927_EXP_IBC_ulianaf_EXT_05_02_20230928215838	547.298	2	617.366	1	b6	27.16	0	0	0	light	45441601536	YILAGVENSK
YILAGVENSK	peptides1	230927_EXP_IBC_ulianaf_EXT_05_03_20230928232900	547.298	2	617.366	1	b6	27.16	0	0	0	light	48493277184	YILAGVENSK
YILAGVENSK	peptides1	230927_EXP_IBC_ulianaf_EXT_05_05_20230929014031	547.298	2	617.366	1	b6	27.89	13824	0	6	light	214264692736	YILAGVENSK
YILAGVENSK	peptides1	230927_EXP_IBC_ulianaf_EXT_05_06_20230929031052	547.298	2	617.366	1	b6	27.42	44353	0	6	light	233341435904	YILAGVENSK
YILAGVENSK	peptides1	230927_EXP_IBC_ulianaf_EXT_05_07_20230929044111	547.298	2	617.366	1	b6	27.56	21344	0	6	light	243173457920	YILAGVENSK
YILAGVENSK	peptides1	230927_EXP_IBC_ulianaf_EXT_05_01_20230928202804	547.298	2	746.408	1	b7	27.09	0	0	0	light	45739737088	YILAGVENSK
YILAGVENSK	peptides1	230927_EXP_IBC_ulianaf_EXT_05_02_20230928215838	547.298	2	746.408	1	b7	27.16	0	0	0	light	45441601536	YILAGVENSK
YILAGVENSK	peptides1	230927_EXP_IBC_ulianaf_EXT_05_03_20230928232900	547.298	2	746.408	1	b7	27.16	0	0	0	light	48493277184	YILAGVENSK
YILAGVENSK	peptides1	230927_EXP_IBC_ulianaf_EXT_05_05_20230929014031	547.298	2	746.408	1	b7	27.09	0	0	0	light	214264692736	YILAGVENSK
YILAGVENSK	peptides1	230927_EXP_IBC_ulianaf_EXT_05_06_20230929031052	547.298	2	746.408	1	b7	27.16	0	0	0	light	233341435904	YILAGVENSK
YILAGVENSK	peptides1	230927_EXP_IBC_ulianaf_EXT_05_07_20230929044111	547.298	2	746.408	1	b7	27.16	0	0	0	light	243173457920	YILAGVENSK
YILAGVENSK	peptides1	230927_EXP_IBC_ulianaf_EXT_05_01_20230928202804	547.298	2	860.451	1	b8	27.09	0	0	0	light	45739737088	YILAGVENSK
YILAGVENSK	peptides1	230927_EXP_IBC_ulianaf_EXT_05_02_20230928215838	547.298	2	860.451	1	b8	27.16	0	0	0	light	45441601536	YILAGVENSK
YILAGVENSK	peptides1	230927_EXP_IBC_ulianaf_EXT_05_03_20230928232900	547.298	2	860.451	1	b8	27.16	0	0	0	light	48493277184	YILAGVENSK
YILAGVENSK	peptides1	230927_EXP_IBC_ulianaf_EXT_05_05_20230929014031	547.298	2	860.451	1	b8	27.09	0	0	0	light	214264692736	YILAGVENSK
YILAGVENSK	peptides1	230927_EXP_IBC_ulianaf_EXT_05_06_20230929031052	547.298	2	860.451	1	b8	27.16	0	0	0	light	233341435904	YILAGVENSK
YILAGVENSK	peptides1	230927_EXP_IBC_ulianaf_EXT_05_07_20230929044111	547.298	2	860.451	1	b8	27.16	0	0	0	light	243173457920	YILAGVENSK
YILAGVENSK	peptides1	230927_EXP_IBC_ulianaf_EXT_05_01_20230928202804	547.298	2	947.483	1	b9	27.09	0	0	0	light	45739737088	YILAGVENSK
YILAGVENSK	peptides1	230927_EXP_IBC_ulianaf_EXT_05_02_20230928215838	547.298	2	947.483	1	b9	27.16	0	0	0	light	45441601536	YILAGVENSK
YILAGVENSK	peptides1	230927_EXP_IBC_ulianaf_EXT_05_03_20230928232900	547.298	2	947.483	1	b9	27.16	0	0	0	light	48493277184	YILAGVENSK
YILAGVENSK	peptides1	230927_EXP_IBC_ulianaf_EXT_05_05_20230929014031	547.298	2	947.483	1	b9	27.09	0	0	0	light	214264692736	YILAGVENSK
YILAGVENSK	peptides1	230927_EXP_IBC_ulianaf_EXT_05_06_20230929031052	547.298	2	947.483	1	b9	27.16	0	0	0	light	233341435904	YILAGVENSK
YILAGVENSK	peptides1	230927_EXP_IBC_ulianaf_EXT_05_07_20230929044111	547.298	2	947.483	1	b9	27.16	0	0	0	light	243173457920	YILAGVENSK
TPVISGGPYEYR	peptides1	230927_EXP_IBC_ulianaf_EXT_05_01_20230928202804	669.838	2	1237.62	1	y11	28.89	2601164	0	7	light	45739737088	TPVISGGPYEYR
TPVISGGPYEYR	peptides1	230927_EXP_IBC_ulianaf_EXT_05_02_20230928215838	669.838	2	1237.62	1	y11	28.96	2846342	0	7	light	45441601536	TPVISGGPYEYR
TPVISGGPYEYR	peptides1	230927_EXP_IBC_ulianaf_EXT_05_03_20230928232900	669.838	2	1237.62	1	y11	28.96	3822372	0	7	light	48493277184	TPVISGGPYEYR
TPVISGGPYEYR	peptides1	230927_EXP_IBC_ulianaf_EXT_05_05_20230929014031	669.838	2	1237.62	1	y11	28.96	3386218	0	7	light	214264692736	TPVISGGPYEYR
TPVISGGPYEYR	peptides1	230927_EXP_IBC_ulianaf_EXT_05_06_20230929031052	669.838	2	1237.62	1	y11	29.03	2930084	0	7	light	233341435904	TPVISGGPYEYR
TPVISGGPYEYR	peptides1	230927_EXP_IBC_ulianaf_EXT_05_07_20230929044111	669.838	2	1237.62	1	y11	29.09	3823570	0	7	light	243173457920	TPVISGGPYEYR
TPVISGGPYEYR	peptides1	230927_EXP_IBC_ulianaf_EXT_05_01_20230928202804	669.838	2	1140.57	1	y10	28.89	35989504	183600	4	light	45739737088	TPVISGGPYEYR
TPVISGGPYEYR	peptides1	230927_EXP_IBC_ulianaf_EXT_05_02_20230928215838	669.838	2	1140.57	1	y10	28.96	34504220	353271	4	light	45441601536	TPVISGGPYEYR
TPVISGGPYEYR	peptides1	230927_EXP_IBC_ulianaf_EXT_05_03_20230928232900	669.838	2	1140.57	1	y10	28.96	39186760	0	4	light	48493277184	TPVISGGPYEYR
TPVISGGPYEYR	peptides1	230927_EXP_IBC_ulianaf_EXT_05_05_20230929014031	669.838	2	1140.57	1	y10	28.96	42921108	64087	4	light	214264692736	TPVISGGPYEYR
TPVISGGPYEYR	peptides1	230927_EXP_IBC_ulianaf_EXT_05_06_20230929031052	669.838	2	1140.57	1	y10	29.03	41680612	0	4	light	233341435904	TPVISGGPYEYR
TPVISGGPYEYR	peptides1	230927_EXP_IBC_ulianaf_EXT_05_07_20230929044111	669.838	2	1140.57	1	y10	29.03	38282428	0	4	light	243173457920	TPVISGGPYEYR
TPVISGGPYEYR	peptides1	230927_EXP_IBC_ulianaf_EXT_05_01_20230928202804	669.838	2	1041.5	1	y9	28.89	89740080	538950	2	light	45739737088	TPVISGGPYEYR
TPVISGGPYEYR	peptides1	230927_EXP_IBC_ulianaf_EXT_05_02_20230928215838	669.838	2	1041.5	1	y9	28.96	92206048	857267	2	light	45441601536	TPVISGGPYEYR
TPVISGGPYEYR	peptides1	230927_EXP_IBC_ulianaf_EXT_05_03_20230928232900	669.838	2	1041.5	1	y9	28.96	100945928	0	2	light	48493277184	TPVISGGPYEYR
TPVISGGPYEYR	peptides1	230927_EXP_IBC_ulianaf_EXT_05_05_20230929014031	669.838	2	1041.5	1	y9	28.96	115563896	133418	2	light	214264692736	TPVISGGPYEYR
TPVISGGPYEYR	peptides1	230927_EXP_IBC_ulianaf_EXT_05_06_20230929031052	669.838	2	1041.5	1	y9	29.03	110874712	0	2	light	233341435904	TPVISGGPYEYR
TPVISGGPYEYR	peptides1	230927_EXP_IBC_ulianaf_EXT_05_07_20230929044111	669.838	2	1041.5	1	y9	29.03	99182768	0	2	light	243173457920	TPVISGGPYEYR
TPVISGGPYEYR	peptides1	230927_EXP_IBC_ulianaf_EXT_05_01_20230928202804	669.838	2	928.416	1	y8	28.89	136276624	491547	1	light	45739737088	TPVISGGPYEYR
TPVISGGPYEYR	peptides1	230927_EXP_IBC_ulianaf_EXT_05_02_20230928215838	669.838	2	928.416	1	y8	28.96	136287584	1263170	1	light	45441601536	TPVISGGPYEYR
TPVISGGPYEYR	peptides1	230927_EXP_IBC_ulianaf_EXT_05_03_20230928232900	669.838	2	928.416	1	y8	28.96	155333392	0	1	light	48493277184	TPVISGGPYEYR
TPVISGGPYEYR	peptides1	230927_EXP_IBC_ulianaf_EXT_05_05_20230929014031	669.838	2	928.416	1	y8	28.96	170382080	230769	1	light	214264692736	TPVISGGPYEYR
TPVISGGPYEYR	peptides1	230927_EXP_IBC_ulianaf_EXT_05_06_20230929031052	669.838	2	928.416	1	y8	29.03	168994560	0	1	light	233341435904	TPVISGGPYEYR
TPVISGGPYEYR	peptides1	230927_EXP_IBC_ulianaf_EXT_05_07_20230929044111	669.838	2	928.416	1	y8	29.03	144738352	0	1	light	243173457920	TPVISGGPYEYR
TPVISGGPYEYR	peptides1	230927_EXP_IBC_ulianaf_EXT_05_01_20230928202804	669.838	2	841.384	1	y7	28.89	39085740	274047	3	light	45739737088	TPVISGGPYEYR
TPVISGGPYEYR	peptides1	230927_EXP_IBC_ulianaf_EXT_05_02_20230928215838	669.838	2	841.384	1	y7	28.96	40800176	381573	3	light	45441601536	TPVISGGPYEYR
TPVISGGPYEYR	peptides1	230927_EXP_IBC_ulianaf_EXT_05_03_20230928232900	669.838	2	841.384	1	y7	28.96	48638928	0	3	light	48493277184	TPVISGGPYEYR
TPVISGGPYEYR	peptides1	230927_EXP_IBC_ulianaf_EXT_05_05_20230929014031	669.838	2	841.384	1	y7	28.96	47587744	80833	3	light	214264692736	TPVISGGPYEYR
TPVISGGPYEYR	peptides1	230927_EXP_IBC_ulianaf_EXT_05_06_20230929031052	669.838	2	841.384	1	y7	29.03	52973444	0	3	light	233341435904	TPVISGGPYEYR
TPVISGGPYEYR	peptides1	230927_EXP_IBC_ulianaf_EXT_05_07_20230929044111	669.838	2	841.384	1	y7	29.09	41905092	0	3	light	243173457920	TPVISGGPYEYR
TPVISGGPYEYR	peptides1	230927_EXP_IBC_ulianaf_EXT_05_01_20230928202804	669.838	2	784.362	1	y6	28.89	12672097	42783	5	light	45739737088	TPVISGGPYEYR
TPVISGGPYEYR	peptides1	230927_EXP_IBC_ulianaf_EXT_05_02_20230928215838	669.838	2	784.362	1	y6	28.96	12589847	117048	5	light	45441601536	TPVISGGPYEYR
TPVISGGPYEYR	peptides1	230927_EXP_IBC_ulianaf_EXT_05_03_20230928232900	669.838	2	784.362	1	y6	28.96	14456216	0	5	light	48493277184	TPVISGGPYEYR
TPVISGGPYEYR	peptides1	230927_EXP_IBC_ulianaf_EXT_05_05_20230929014031	669.838	2	784.362	1	y6	28.96	15922211	0	5	light	214264692736	TPVISGGPYEYR
TPVISGGPYEYR	peptides1	230927_EXP_IBC_ulianaf_EXT_05_06_20230929031052	669.838	2	784.362	1	y6	29.03	14288340	0	5	light	233341435904	TPVISGGPYEYR
TPVISGGPYEYR	peptides1	230927_EXP_IBC_ulianaf_EXT_05_07_20230929044111	669.838	2	784.362	1	y6	29.03	13172501	0	5	light	243173457920	TPVISGGPYEYR
TPVISGGPYEYR	peptides1	230927_EXP_IBC_ulianaf_EXT_05_01_20230928202804	669.838	2	727.341	1	y5	28.89	8483249	0	6	light	45739737088	TPVISGGPYEYR
TPVISGGPYEYR	peptides1	230927_EXP_IBC_ulianaf_EXT_05_02_20230928215838	669.838	2	727.341	1	y5	28.96	8685693	0	6	light	45441601536	TPVISGGPYEYR
TPVISGGPYEYR	peptides1	230927_EXP_IBC_ulianaf_EXT_05_03_20230928232900	669.838	2	727.341	1	y5	28.96	9711269	0	6	light	48493277184	TPVISGGPYEYR
TPVISGGPYEYR	peptides1	230927_EXP_IBC_ulianaf_EXT_05_05_20230929014031	669.838	2	727.341	1	y5	28.96	10938577	0	6	light	214264692736	TPVISGGPYEYR
TPVISGGPYEYR	peptides1	230927_EXP_IBC_ulianaf_EXT_05_06_20230929031052	669.838	2	727.341	1	y5	29.03	10509430	0	6	light	233341435904	TPVISGGPYEYR
TPVISGGPYEYR	peptides1	230927_EXP_IBC_ulianaf_EXT_05_07_20230929044111	669.838	2	727.341	1	y5	29.03	10678025	0	6	light	243173457920	TPVISGGPYEYR
TPVISGGPYEYR	peptides1	230927_EXP_IBC_ulianaf_EXT_05_01_20230928202804	669.838	2	612.335	1	b7	28.83	251636	0	8	light	45739737088	TPVISGGPYEYR
TPVISGGPYEYR	peptides1	230927_EXP_IBC_ulianaf_EXT_05_02_20230928215838	669.838	2	612.335	1	b7	28.96	842596	0	8	light	45441601536	TPVISGGPYEYR
TPVISGGPYEYR	peptides1	230927_EXP_IBC_ulianaf_EXT_05_03_20230928232900	669.838	2	612.335	1	b7	28.96	367939	0	9	light	48493277184	TPVISGGPYEYR
TPVISGGPYEYR	peptides1	230927_EXP_IBC_ulianaf_EXT_05_05_20230929014031	669.838	2	612.335	1	b7	28.96	543499	0	8	light	214264692736	TPVISGGPYEYR
TPVISGGPYEYR	peptides1	230927_EXP_IBC_ulianaf_EXT_05_06_20230929031052	669.838	2	612.335	1	b7	29.16	40540	0	8	light	233341435904	TPVISGGPYEYR
TPVISGGPYEYR	peptides1	230927_EXP_IBC_ulianaf_EXT_05_07_20230929044111	669.838	2	612.335	1	b7	29.09	1029281	0	8	light	243173457920	TPVISGGPYEYR
TPVISGGPYEYR	peptides1	230927_EXP_IBC_ulianaf_EXT_05_01_20230928202804	669.838	2	709.388	1	b8	28.69	0	0	0	light	45739737088	TPVISGGPYEYR
TPVISGGPYEYR	peptides1	230927_EXP_IBC_ulianaf_EXT_05_02_20230928215838	669.838	2	709.388	1	b8	28.76	0	0	0	light	45441601536	TPVISGGPYEYR
TPVISGGPYEYR	peptides1	230927_EXP_IBC_ulianaf_EXT_05_03_20230928232900	669.838	2	709.388	1	b8	28.63	0	0	0	light	48493277184	TPVISGGPYEYR
TPVISGGPYEYR	peptides1	230927_EXP_IBC_ulianaf_EXT_05_05_20230929014031	669.838	2	709.388	1	b8	28.69	0	0	0	light	214264692736	TPVISGGPYEYR
TPVISGGPYEYR	peptides1	230927_EXP_IBC_ulianaf_EXT_05_06_20230929031052	669.838	2	709.388	1	b8	28.63	0	0	0	light	233341435904	TPVISGGPYEYR
TPVISGGPYEYR	peptides1	230927_EXP_IBC_ulianaf_EXT_05_07_20230929044111	669.838	2	709.388	1	b8	28.76	12781	0	9	light	243173457920	TPVISGGPYEYR
TPVISGGPYEYR	peptides1	230927_EXP_IBC_ulianaf_EXT_05_01_20230928202804	669.838	2	872.451	1	b9	28.69	0	0	0	light	45739737088	TPVISGGPYEYR
TPVISGGPYEYR	peptides1	230927_EXP_IBC_ulianaf_EXT_05_02_20230928215838	669.838	2	872.451	1	b9	28.76	0	0	0	light	45441601536	TPVISGGPYEYR
TPVISGGPYEYR	peptides1	230927_EXP_IBC_ulianaf_EXT_05_03_20230928232900	669.838	2	872.451	1	b9	28.63	0	0	0	light	48493277184	TPVISGGPYEYR
TPVISGGPYEYR	peptides1	230927_EXP_IBC_ulianaf_EXT_05_05_20230929014031	669.838	2	872.451	1	b9	28.69	0	0	0	light	214264692736	TPVISGGPYEYR
TPVISGGPYEYR	peptides1	230927_EXP_IBC_ulianaf_EXT_05_06_20230929031052	669.838	2	872.451	1	b9	28.63	0	0	0	light	233341435904	TPVISGGPYEYR
TPVISGGPYEYR	peptides1	230927_EXP_IBC_ulianaf_EXT_05_07_20230929044111	669.838	2	872.451	1	b9	28.69	0	0	0	light	243173457920	TPVISGGPYEYR
TPVISGGPYEYR	peptides1	230927_EXP_IBC_ulianaf_EXT_05_01_20230928202804	669.838	2	1001.49	1	b10	28.83	167400	0	9	light	45739737088	TPVISGGPYEYR
TPVISGGPYEYR	peptides1	230927_EXP_IBC_ulianaf_EXT_05_02_20230928215838	669.838	2	1001.49	1	b10	28.83	30106	0	9	light	45441601536	TPVISGGPYEYR
TPVISGGPYEYR	peptides1	230927_EXP_IBC_ulianaf_EXT_05_03_20230928232900	669.838	2	1001.49	1	b10	28.96	398986	0	8	light	48493277184	TPVISGGPYEYR
TPVISGGPYEYR	peptides1	230927_EXP_IBC_ulianaf_EXT_05_05_20230929014031	669.838	2	1001.49	1	b10	28.89	99659	0	9	light	214264692736	TPVISGGPYEYR
TPVISGGPYEYR	peptides1	230927_EXP_IBC_ulianaf_EXT_05_06_20230929031052	669.838	2	1001.49	1	b10	28.63	0	0	0	light	233341435904	TPVISGGPYEYR
TPVISGGPYEYR	peptides1	230927_EXP_IBC_ulianaf_EXT_05_07_20230929044111	669.838	2	1001.49	1	b10	28.69	0	0	0	light	243173457920	TPVISGGPYEYR
TPVISGGPYEYR	peptides1	230927_EXP_IBC_ulianaf_EXT_05_01_20230928202804	669.838	2	1164.56	1	b11	28.69	0	0	0	light	45739737088	TPVISGGPYEYR
TPVISGGPYEYR	peptides1	230927_EXP_IBC_ulianaf_EXT_05_02_20230928215838	669.838	2	1164.56	1	b11	28.76	0	0	0	light	45441601536	TPVISGGPYEYR
TPVISGGPYEYR	peptides1	230927_EXP_IBC_ulianaf_EXT_05_03_20230928232900	669.838	2	1164.56	1	b11	28.63	0	0	0	light	48493277184	TPVISGGPYEYR
TPVISGGPYEYR	peptides1	230927_EXP_IBC_ulianaf_EXT_05_05_20230929014031	669.838	2	1164.56	1	b11	28.69	0	0	0	light	214264692736	TPVISGGPYEYR
TPVISGGPYEYR	peptides1	230927_EXP_IBC_ulianaf_EXT_05_06_20230929031052	669.838	2	1164.56	1	b11	28.63	0	0	0	light	233341435904	TPVISGGPYEYR
TPVISGGPYEYR	peptides1	230927_EXP_IBC_ulianaf_EXT_05_07_20230929044111	669.838	2	1164.56	1	b11	28.69	0	0	0	light	243173457920	TPVISGGPYEYR
TPVITGAPYEYR	peptides1	230927_EXP_IBC_ulianaf_EXT_05_01_20230928202804	683.854	2	1265.65	1	y11	30.56	1859520	0	7	light	45739737088	TPVITGAPYEYR
TPVITGAPYEYR	peptides1	230927_EXP_IBC_ulianaf_EXT_05_02_20230928215838	683.854	2	1265.65	1	y11	30.64	1315870	0	7	light	45441601536	TPVITGAPYEYR
TPVITGAPYEYR	peptides1	230927_EXP_IBC_ulianaf_EXT_05_03_20230928232900	683.854	2	1265.65	1	y11	30.69	2153550	0	7	light	48493277184	TPVITGAPYEYR
TPVITGAPYEYR	peptides1	230927_EXP_IBC_ulianaf_EXT_05_05_20230929014031	683.854	2	1265.65	1	y11	30.65	2066041	0	7	light	214264692736	TPVITGAPYEYR
TPVITGAPYEYR	peptides1	230927_EXP_IBC_ulianaf_EXT_05_06_20230929031052	683.854	2	1265.65	1	y11	30.72	2559436	742	7	light	233341435904	TPVITGAPYEYR
TPVITGAPYEYR	peptides1	230927_EXP_IBC_ulianaf_EXT_05_07_20230929044111	683.854	2	1265.65	1	y11	30.73	1751655	0	7	light	243173457920	TPVITGAPYEYR
TPVITGAPYEYR	peptides1	230927_EXP_IBC_ulianaf_EXT_05_01_20230928202804	683.854	2	1168.6	1	y10	30.56	28244696	421034	5	light	45739737088	TPVITGAPYEYR
TPVITGAPYEYR	peptides1	230927_EXP_IBC_ulianaf_EXT_05_02_20230928215838	683.854	2	1168.6	1	y10	30.64	26329060	66072	5	light	45441601536	TPVITGAPYEYR
TPVITGAPYEYR	peptides1	230927_EXP_IBC_ulianaf_EXT_05_03_20230928232900	683.854	2	1168.6	1	y10	30.7	29137528	73772	5	light	48493277184	TPVITGAPYEYR
TPVITGAPYEYR	peptides1	230927_EXP_IBC_ulianaf_EXT_05_05_20230929014031	683.854	2	1168.6	1	y10	30.66	34184008	111913	5	light	214264692736	TPVITGAPYEYR
TPVITGAPYEYR	peptides1	230927_EXP_IBC_ulianaf_EXT_05_06_20230929031052	683.854	2	1168.6	1	y10	30.72	36486096	390478	5	light	233341435904	TPVITGAPYEYR
TPVITGAPYEYR	peptides1	230927_EXP_IBC_ulianaf_EXT_05_07_20230929044111	683.854	2	1168.6	1	y10	30.73	26201322	146026	5	light	243173457920	TPVITGAPYEYR
TPVITGAPYEYR	peptides1	230927_EXP_IBC_ulianaf_EXT_05_01_20230928202804	683.854	2	1069.53	1	y9	30.56	73454400	1298574	2	light	45739737088	TPVITGAPYEYR
TPVITGAPYEYR	peptides1	230927_EXP_IBC_ulianaf_EXT_05_02_20230928215838	683.854	2	1069.53	1	y9	30.64	66470724	73506	2	light	45441601536	TPVITGAPYEYR
TPVITGAPYEYR	peptides1	230927_EXP_IBC_ulianaf_EXT_05_03_20230928232900	683.854	2	1069.53	1	y9	30.7	76363576	278362	2	light	48493277184	TPVITGAPYEYR
TPVITGAPYEYR	peptides1	230927_EXP_IBC_ulianaf_EXT_05_05_20230929014031	683.854	2	1069.53	1	y9	30.66	88435904	223159	2	light	214264692736	TPVITGAPYEYR
TPVITGAPYEYR	peptides1	230927_EXP_IBC_ulianaf_EXT_05_06_20230929031052	683.854	2	1069.53	1	y9	30.72	91753992	1159535	2	light	233341435904	TPVITGAPYEYR
TPVITGAPYEYR	peptides1	230927_EXP_IBC_ulianaf_EXT_05_07_20230929044111	683.854	2	1069.53	1	y9	30.73	67373728	326329	2	light	243173457920	TPVITGAPYEYR
TPVITGAPYEYR	peptides1	230927_EXP_IBC_ulianaf_EXT_05_01_20230928202804	683.854	2	956.447	1	y8	30.56	114169288	1914708	1	light	45739737088	TPVITGAPYEYR
TPVITGAPYEYR	peptides1	230927_EXP_IBC_ulianaf_EXT_05_02_20230928215838	683.854	2	956.447	1	y8	30.64	102423104	100217	1	light	45441601536	TPVITGAPYEYR
TPVITGAPYEYR	peptides1	230927_EXP_IBC_ulianaf_EXT_05_03_20230928232900	683.854	2	956.447	1	y8	30.7	119724816	317283	1	light	48493277184	TPVITGAPYEYR
TPVITGAPYEYR	peptides1	230927_EXP_IBC_ulianaf_EXT_05_05_20230929014031	683.854	2	956.447	1	y8	30.66	139536784	208423	1	light	214264692736	TPVITGAPYEYR
TPVITGAPYEYR	peptides1	230927_EXP_IBC_ulianaf_EXT_05_06_20230929031052	683.854	2	956.447	1	y8	30.72	144795952	1785772	1	light	233341435904	TPVITGAPYEYR
TPVITGAPYEYR	peptides1	230927_EXP_IBC_ulianaf_EXT_05_07_20230929044111	683.854	2	956.447	1	y8	30.73	106423384	424236	1	light	243173457920	TPVITGAPYEYR
TPVITGAPYEYR	peptides1	230927_EXP_IBC_ulianaf_EXT_05_01_20230928202804	683.854	2	855.4	1	y7	30.56	53858732	828637	3	light	45739737088	TPVITGAPYEYR
TPVITGAPYEYR	peptides1	230927_EXP_IBC_ulianaf_EXT_05_02_20230928215838	683.854	2	855.4	1	y7	30.64	48447008	84256	3	light	45441601536	TPVITGAPYEYR
TPVITGAPYEYR	peptides1	230927_EXP_IBC_ulianaf_EXT_05_03_20230928232900	683.854	2	855.4	1	y7	30.7	56125144	157454	3	light	48493277184	TPVITGAPYEYR
TPVITGAPYEYR	peptides1	230927_EXP_IBC_ulianaf_EXT_05_05_20230929014031	683.854	2	855.4	1	y7	30.66	63511452	115096	3	light	214264692736	TPVITGAPYEYR
TPVITGAPYEYR	peptides1	230927_EXP_IBC_ulianaf_EXT_05_06_20230929031052	683.854	2	855.4	1	y7	30.72	68740440	838373	3	light	233341435904	TPVITGAPYEYR
TPVITGAPYEYR	peptides1	230927_EXP_IBC_ulianaf_EXT_05_07_20230929044111	683.854	2	855.4	1	y7	30.73	50558600	249660	3	light	243173457920	TPVITGAPYEYR
TPVITGAPYEYR	peptides1	230927_EXP_IBC_ulianaf_EXT_05_01_20230928202804	683.854	2	798.378	1	y6	30.56	10401569	173990	6	light	45739737088	TPVITGAPYEYR
TPVITGAPYEYR	peptides1	230927_EXP_IBC_ulianaf_EXT_05_02_20230928215838	683.854	2	798.378	1	y6	30.63	9138949	0	6	light	45441601536	TPVITGAPYEYR
TPVITGAPYEYR	peptides1	230927_EXP_IBC_ulianaf_EXT_05_03_20230928232900	683.854	2	798.378	1	y6	30.7	10438699	0	6	light	48493277184	TPVITGAPYEYR
TPVITGAPYEYR	peptides1	230927_EXP_IBC_ulianaf_EXT_05_05_20230929014031	683.854	2	798.378	1	y6	30.66	11986286	0	6	light	214264692736	TPVITGAPYEYR
TPVITGAPYEYR	peptides1	230927_EXP_IBC_ulianaf_EXT_05_06_20230929031052	683.854	2	798.378	1	y6	30.72	13620093	85434	6	light	233341435904	TPVITGAPYEYR
TPVITGAPYEYR	peptides1	230927_EXP_IBC_ulianaf_EXT_05_07_20230929044111	683.854	2	798.378	1	y6	30.73	9802818	0	6	light	243173457920	TPVITGAPYEYR
TPVITGAPYEYR	peptides1	230927_EXP_IBC_ulianaf_EXT_05_01_20230928202804	683.854	2	727.341	1	y5	30.57	31942202	506024	4	light	45739737088	TPVITGAPYEYR
TPVITGAPYEYR	peptides1	230927_EXP_IBC_ulianaf_EXT_05_02_20230928215838	683.854	2	727.341	1	y5	30.64	28943948	0	4	light	45441601536	TPVITGAPYEYR
TPVITGAPYEYR	peptides1	230927_EXP_IBC_ulianaf_EXT_05_03_20230928232900	683.854	2	727.341	1	y5	30.7	32972080	90689	4	light	48493277184	TPVITGAPYEYR
TPVITGAPYEYR	peptides1	230927_EXP_IBC_ulianaf_EXT_05_05_20230929014031	683.854	2	727.341	1	y5	30.65	38914972	72947	4	light	214264692736	TPVITGAPYEYR
TPVITGAPYEYR	peptides1	230927_EXP_IBC_ulianaf_EXT_05_06_20230929031052	683.854	2	727.341	1	y5	30.72	40689064	537029	4	light	233341435904	TPVITGAPYEYR
TPVITGAPYEYR	peptides1	230927_EXP_IBC_ulianaf_EXT_05_07_20230929044111	683.854	2	727.341	1	y5	30.73	29099684	182040	4	light	243173457920	TPVITGAPYEYR
TPVITGAPYEYR	peptides1	230927_EXP_IBC_ulianaf_EXT_05_01_20230928202804	683.854	2	640.366	1	b7	30.56	1179528	0	8	light	45739737088	TPVITGAPYEYR
TPVITGAPYEYR	peptides1	230927_EXP_IBC_ulianaf_EXT_05_02_20230928215838	683.854	2	640.366	1	b7	30.64	1104448	0	8	light	45441601536	TPVITGAPYEYR
TPVITGAPYEYR	peptides1	230927_EXP_IBC_ulianaf_EXT_05_03_20230928232900	683.854	2	640.366	1	b7	30.7	1228098	0	8	light	48493277184	TPVITGAPYEYR
TPVITGAPYEYR	peptides1	230927_EXP_IBC_ulianaf_EXT_05_05_20230929014031	683.854	2	640.366	1	b7	30.65	1458186	0	8	light	214264692736	TPVITGAPYEYR
TPVITGAPYEYR	peptides1	230927_EXP_IBC_ulianaf_EXT_05_06_20230929031052	683.854	2	640.366	1	b7	30.66	1671742	496	8	light	233341435904	TPVITGAPYEYR
TPVITGAPYEYR	peptides1	230927_EXP_IBC_ulianaf_EXT_05_07_20230929044111	683.854	2	640.366	1	b7	30.72	1005647	16359	8	light	243173457920	TPVITGAPYEYR
TPVITGAPYEYR	peptides1	230927_EXP_IBC_ulianaf_EXT_05_01_20230928202804	683.854	2	737.419	1	b8	30.7	11554	0	10	light	45739737088	TPVITGAPYEYR
TPVITGAPYEYR	peptides1	230927_EXP_IBC_ulianaf_EXT_05_02_20230928215838	683.854	2	737.419	1	b8	30.42	0	0	0	light	45441601536	TPVITGAPYEYR
TPVITGAPYEYR	peptides1	230927_EXP_IBC_ulianaf_EXT_05_03_20230928232900	683.854	2	737.419	1	b8	30.49	0	0	0	light	48493277184	TPVITGAPYEYR
TPVITGAPYEYR	peptides1	230927_EXP_IBC_ulianaf_EXT_05_05_20230929014031	683.854	2	737.419	1	b8	30.45	0	0	0	light	214264692736	TPVITGAPYEYR
TPVITGAPYEYR	peptides1	230927_EXP_IBC_ulianaf_EXT_05_06_20230929031052	683.854	2	737.419	1	b8	30.53	0	0	0	light	233341435904	TPVITGAPYEYR
TPVITGAPYEYR	peptides1	230927_EXP_IBC_ulianaf_EXT_05_07_20230929044111	683.854	2	737.419	1	b8	30.66	0	0	0	light	243173457920	TPVITGAPYEYR
TPVITGAPYEYR	peptides1	230927_EXP_IBC_ulianaf_EXT_05_01_20230928202804	683.854	2	900.483	1	b9	30.42	0	0	0	light	45739737088	TPVITGAPYEYR
TPVITGAPYEYR	peptides1	230927_EXP_IBC_ulianaf_EXT_05_02_20230928215838	683.854	2	900.483	1	b9	30.42	0	0	0	light	45441601536	TPVITGAPYEYR
TPVITGAPYEYR	peptides1	230927_EXP_IBC_ulianaf_EXT_05_03_20230928232900	683.854	2	900.483	1	b9	30.49	0	0	0	light	48493277184	TPVITGAPYEYR
TPVITGAPYEYR	peptides1	230927_EXP_IBC_ulianaf_EXT_05_05_20230929014031	683.854	2	900.483	1	b9	30.45	0	0	0	light	214264692736	TPVITGAPYEYR
TPVITGAPYEYR	peptides1	230927_EXP_IBC_ulianaf_EXT_05_06_20230929031052	683.854	2	900.483	1	b9	30.53	0	0	0	light	233341435904	TPVITGAPYEYR
TPVITGAPYEYR	peptides1	230927_EXP_IBC_ulianaf_EXT_05_07_20230929044111	683.854	2	900.483	1	b9	30.66	0	0	0	light	243173457920	TPVITGAPYEYR
TPVITGAPYEYR	peptides1	230927_EXP_IBC_ulianaf_EXT_05_01_20230928202804	683.854	2	1029.53	1	b10	30.5	47902	0	9	light	45739737088	TPVITGAPYEYR
TPVITGAPYEYR	peptides1	230927_EXP_IBC_ulianaf_EXT_05_02_20230928215838	683.854	2	1029.53	1	b10	30.42	0	0	0	light	45441601536	TPVITGAPYEYR
TPVITGAPYEYR	peptides1	230927_EXP_IBC_ulianaf_EXT_05_03_20230928232900	683.854	2	1029.53	1	b10	30.49	0	0	0	light	48493277184	TPVITGAPYEYR
TPVITGAPYEYR	peptides1	230927_EXP_IBC_ulianaf_EXT_05_05_20230929014031	683.854	2	1029.53	1	b10	30.53	10467	0	9	light	214264692736	TPVITGAPYEYR
TPVITGAPYEYR	peptides1	230927_EXP_IBC_ulianaf_EXT_05_06_20230929031052	683.854	2	1029.53	1	b10	30.53	0	0	0	light	233341435904	TPVITGAPYEYR
TPVITGAPYEYR	peptides1	230927_EXP_IBC_ulianaf_EXT_05_07_20230929044111	683.854	2	1029.53	1	b10	30.66	14	0	9	light	243173457920	TPVITGAPYEYR
TPVITGAPYEYR	peptides1	230927_EXP_IBC_ulianaf_EXT_05_01_20230928202804	683.854	2	1192.59	1	b11	30.42	0	0	0	light	45739737088	TPVITGAPYEYR
TPVITGAPYEYR	peptides1	230927_EXP_IBC_ulianaf_EXT_05_02_20230928215838	683.854	2	1192.59	1	b11	30.42	0	0	0	light	45441601536	TPVITGAPYEYR
TPVITGAPYEYR	peptides1	230927_EXP_IBC_ulianaf_EXT_05_03_20230928232900	683.854	2	1192.59	1	b11	30.49	0	0	0	light	48493277184	TPVITGAPYEYR
TPVITGAPYEYR	peptides1	230927_EXP_IBC_ulianaf_EXT_05_05_20230929014031	683.854	2	1192.59	1	b11	30.45	0	0	0	light	214264692736	TPVITGAPYEYR
TPVITGAPYEYR	peptides1	230927_EXP_IBC_ulianaf_EXT_05_06_20230929031052	683.854	2	1192.59	1	b11	30.53	0	0	0	light	233341435904	TPVITGAPYEYR
TPVITGAPYEYR	peptides1	230927_EXP_IBC_ulianaf_EXT_05_07_20230929044111	683.854	2	1192.59	1	b11	30.66	0	0	0	light	243173457920	TPVITGAPYEYR
DGLDAASYYAPVR	peptides1	230927_EXP_IBC_ulianaf_EXT_05_01_20230928202804	699.338	2	1225.62	1	y11	35.63	1449128	0	7	light	45739737088	DGLDAASYYAPVR
DGLDAASYYAPVR	peptides1	230927_EXP_IBC_ulianaf_EXT_05_02_20230928215838	699.338	2	1225.62	1	y11	35.63	1230004	0	7	light	45441601536	DGLDAASYYAPVR
DGLDAASYYAPVR	peptides1	230927_EXP_IBC_ulianaf_EXT_05_03_20230928232900	699.338	2	1225.62	1	y11	35.7	1064118	0	7	light	48493277184	DGLDAASYYAPVR
DGLDAASYYAPVR	peptides1	230927_EXP_IBC_ulianaf_EXT_05_05_20230929014031	699.338	2	1225.62	1	y11	35.63	991002	0	7	light	214264692736	DGLDAASYYAPVR
DGLDAASYYAPVR	peptides1	230927_EXP_IBC_ulianaf_EXT_05_06_20230929031052	699.338	2	1225.62	1	y11	35.7	887004	0	7	light	233341435904	DGLDAASYYAPVR
DGLDAASYYAPVR	peptides1	230927_EXP_IBC_ulianaf_EXT_05_07_20230929044111	699.338	2	1225.62	1	y11	35.7	672107	0	7	light	243173457920	DGLDAASYYAPVR
DGLDAASYYAPVR	peptides1	230927_EXP_IBC_ulianaf_EXT_05_01_20230928202804	699.338	2	1112.54	1	y10	35.63	44717308	188552	4	light	45739737088	DGLDAASYYAPVR
DGLDAASYYAPVR	peptides1	230927_EXP_IBC_ulianaf_EXT_05_02_20230928215838	699.338	2	1112.54	1	y10	35.63	39270012	68031	4	light	45441601536	DGLDAASYYAPVR
DGLDAASYYAPVR	peptides1	230927_EXP_IBC_ulianaf_EXT_05_03_20230928232900	699.338	2	1112.54	1	y10	35.63	40562724	38338	4	light	48493277184	DGLDAASYYAPVR
DGLDAASYYAPVR	peptides1	230927_EXP_IBC_ulianaf_EXT_05_05_20230929014031	699.338	2	1112.54	1	y10	35.63	38003856	550874	4	light	214264692736	DGLDAASYYAPVR
DGLDAASYYAPVR	peptides1	230927_EXP_IBC_ulianaf_EXT_05_06_20230929031052	699.338	2	1112.54	1	y10	35.7	35432420	418538	4	light	233341435904	DGLDAASYYAPVR
DGLDAASYYAPVR	peptides1	230927_EXP_IBC_ulianaf_EXT_05_07_20230929044111	699.338	2	1112.54	1	y10	35.7	27681738	139816	4	light	243173457920	DGLDAASYYAPVR
DGLDAASYYAPVR	peptides1	230927_EXP_IBC_ulianaf_EXT_05_01_20230928202804	699.338	2	997.51	1	y9	35.63	52463908	29434	3	light	45739737088	DGLDAASYYAPVR
DGLDAASYYAPVR	peptides1	230927_EXP_IBC_ulianaf_EXT_05_02_20230928215838	699.338	2	997.51	1	y9	35.63	46766788	56484	3	light	45441601536	DGLDAASYYAPVR
DGLDAASYYAPVR	peptides1	230927_EXP_IBC_ulianaf_EXT_05_03_20230928232900	699.338	2	997.51	1	y9	35.63	47250880	285610	3	light	48493277184	DGLDAASYYAPVR
DGLDAASYYAPVR	peptides1	230927_EXP_IBC_ulianaf_EXT_05_05_20230929014031	699.338	2	997.51	1	y9	35.63	44616336	446530	3	light	214264692736	DGLDAASYYAPVR
DGLDAASYYAPVR	peptides1	230927_EXP_IBC_ulianaf_EXT_05_06_20230929031052	699.338	2	997.51	1	y9	35.7	42458332	525373	3	light	233341435904	DGLDAASYYAPVR
DGLDAASYYAPVR	peptides1	230927_EXP_IBC_ulianaf_EXT_05_07_20230929044111	699.338	2	997.51	1	y9	35.7	33287746	16106	3	light	243173457920	DGLDAASYYAPVR
DGLDAASYYAPVR	peptides1	230927_EXP_IBC_ulianaf_EXT_05_01_20230928202804	699.338	2	926.473	1	y8	35.63	84153952	57312	2	light	45739737088	DGLDAASYYAPVR
DGLDAASYYAPVR	peptides1	230927_EXP_IBC_ulianaf_EXT_05_02_20230928215838	699.338	2	926.473	1	y8	35.63	73706584	304471	2	light	45441601536	DGLDAASYYAPVR
DGLDAASYYAPVR	peptides1	230927_EXP_IBC_ulianaf_EXT_05_03_20230928232900	699.338	2	926.473	1	y8	35.63	75765288	306335	2	light	48493277184	DGLDAASYYAPVR
DGLDAASYYAPVR	peptides1	230927_EXP_IBC_ulianaf_EXT_05_05_20230929014031	699.338	2	926.473	1	y8	35.63	71286344	867104	2	light	214264692736	DGLDAASYYAPVR
DGLDAASYYAPVR	peptides1	230927_EXP_IBC_ulianaf_EXT_05_06_20230929031052	699.338	2	926.473	1	y8	35.7	71127152	759471	2	light	233341435904	DGLDAASYYAPVR
DGLDAASYYAPVR	peptides1	230927_EXP_IBC_ulianaf_EXT_05_07_20230929044111	699.338	2	926.473	1	y8	35.7	50689584	313534	2	light	243173457920	DGLDAASYYAPVR
DGLDAASYYAPVR	peptides1	230927_EXP_IBC_ulianaf_EXT_05_01_20230928202804	699.338	2	855.436	1	y7	35.63	102247768	472581	1	light	45739737088	DGLDAASYYAPVR
DGLDAASYYAPVR	peptides1	230927_EXP_IBC_ulianaf_EXT_05_02_20230928215838	699.338	2	855.436	1	y7	35.63	88703808	444744	1	light	45441601536	DGLDAASYYAPVR
DGLDAASYYAPVR	peptides1	230927_EXP_IBC_ulianaf_EXT_05_03_20230928232900	699.338	2	855.436	1	y7	35.63	92966480	493337	1	light	48493277184	DGLDAASYYAPVR
DGLDAASYYAPVR	peptides1	230927_EXP_IBC_ulianaf_EXT_05_05_20230929014031	699.338	2	855.436	1	y7	35.63	86951664	1093733	1	light	214264692736	DGLDAASYYAPVR
DGLDAASYYAPVR	peptides1	230927_EXP_IBC_ulianaf_EXT_05_06_20230929031052	699.338	2	855.436	1	y7	35.7	82037568	948270	1	light	233341435904	DGLDAASYYAPVR
DGLDAASYYAPVR	peptides1	230927_EXP_IBC_ulianaf_EXT_05_07_20230929044111	699.338	2	855.436	1	y7	35.7	60991680	380904	1	light	243173457920	DGLDAASYYAPVR
DGLDAASYYAPVR	peptides1	230927_EXP_IBC_ulianaf_EXT_05_01_20230928202804	699.338	2	768.404	1	y6	35.63	38562064	0	5	light	45739737088	DGLDAASYYAPVR
DGLDAASYYAPVR	peptides1	230927_EXP_IBC_ulianaf_EXT_05_02_20230928215838	699.338	2	768.404	1	y6	35.63	34136992	60559	5	light	45441601536	DGLDAASYYAPVR
DGLDAASYYAPVR	peptides1	230927_EXP_IBC_ulianaf_EXT_05_03_20230928232900	699.338	2	768.404	1	y6	35.63	33456044	57983	5	light	48493277184	DGLDAASYYAPVR
DGLDAASYYAPVR	peptides1	230927_EXP_IBC_ulianaf_EXT_05_05_20230929014031	699.338	2	768.404	1	y6	35.63	31268068	374817	5	light	214264692736	DGLDAASYYAPVR
DGLDAASYYAPVR	peptides1	230927_EXP_IBC_ulianaf_EXT_05_06_20230929031052	699.338	2	768.404	1	y6	35.7	30379788	347885	5	light	233341435904	DGLDAASYYAPVR
DGLDAASYYAPVR	peptides1	230927_EXP_IBC_ulianaf_EXT_05_07_20230929044111	699.338	2	768.404	1	y6	35.7	23601696	0	5	light	243173457920	DGLDAASYYAPVR
DGLDAASYYAPVR	peptides1	230927_EXP_IBC_ulianaf_EXT_05_01_20230928202804	699.338	2	371.24	1	y3	35.63	25779774	0	6	light	45739737088	DGLDAASYYAPVR
DGLDAASYYAPVR	peptides1	230927_EXP_IBC_ulianaf_EXT_05_02_20230928215838	699.338	2	371.24	1	y3	35.63	23458540	33416	6	light	45441601536	DGLDAASYYAPVR
DGLDAASYYAPVR	peptides1	230927_EXP_IBC_ulianaf_EXT_05_03_20230928232900	699.338	2	371.24	1	y3	35.63	24861738	0	6	light	48493277184	DGLDAASYYAPVR
DGLDAASYYAPVR	peptides1	230927_EXP_IBC_ulianaf_EXT_05_05_20230929014031	699.338	2	371.24	1	y3	35.63	22703570	230231	6	light	214264692736	DGLDAASYYAPVR
DGLDAASYYAPVR	peptides1	230927_EXP_IBC_ulianaf_EXT_05_06_20230929031052	699.338	2	371.24	1	y3	35.7	22795692	259315	6	light	233341435904	DGLDAASYYAPVR
DGLDAASYYAPVR	peptides1	230927_EXP_IBC_ulianaf_EXT_05_07_20230929044111	699.338	2	371.24	1	y3	35.7	16407599	0	6	light	243173457920	DGLDAASYYAPVR
DGLDAASYYAPVR	peptides1	230927_EXP_IBC_ulianaf_EXT_05_01_20230928202804	699.338	2	793.336	1	b8	35.57	263749	0	8	light	45739737088	DGLDAASYYAPVR
DGLDAASYYAPVR	peptides1	230927_EXP_IBC_ulianaf_EXT_05_02_20230928215838	699.338	2	793.336	1	b8	35.23	0	0	0	light	45441601536	DGLDAASYYAPVR
DGLDAASYYAPVR	peptides1	230927_EXP_IBC_ulianaf_EXT_05_03_20230928232900	699.338	2	793.336	1	b8	35.7	342388	0	8	light	48493277184	DGLDAASYYAPVR
DGLDAASYYAPVR	peptides1	230927_EXP_IBC_ulianaf_EXT_05_05_20230929014031	699.338	2	793.336	1	b8	35.3	0	0	0	light	214264692736	DGLDAASYYAPVR
DGLDAASYYAPVR	peptides1	230927_EXP_IBC_ulianaf_EXT_05_06_20230929031052	699.338	2	793.336	1	b8	35.57	40705	0	8	light	233341435904	DGLDAASYYAPVR
DGLDAASYYAPVR	peptides1	230927_EXP_IBC_ulianaf_EXT_05_07_20230929044111	699.338	2	793.336	1	b8	35.23	4495	0	8	light	243173457920	DGLDAASYYAPVR
DGLDAASYYAPVR	peptides1	230927_EXP_IBC_ulianaf_EXT_05_01_20230928202804	699.338	2	956.4	1	b9	35.1	0	0	0	light	45739737088	DGLDAASYYAPVR
DGLDAASYYAPVR	peptides1	230927_EXP_IBC_ulianaf_EXT_05_02_20230928215838	699.338	2	956.4	1	b9	35.23	0	0	0	light	45441601536	DGLDAASYYAPVR
DGLDAASYYAPVR	peptides1	230927_EXP_IBC_ulianaf_EXT_05_03_20230928232900	699.338	2	956.4	1	b9	35.17	0	0	0	light	48493277184	DGLDAASYYAPVR
DGLDAASYYAPVR	peptides1	230927_EXP_IBC_ulianaf_EXT_05_05_20230929014031	699.338	2	956.4	1	b9	35.3	0	0	0	light	214264692736	DGLDAASYYAPVR
DGLDAASYYAPVR	peptides1	230927_EXP_IBC_ulianaf_EXT_05_06_20230929031052	699.338	2	956.4	1	b9	35.3	0	0	0	light	233341435904	DGLDAASYYAPVR
DGLDAASYYAPVR	peptides1	230927_EXP_IBC_ulianaf_EXT_05_07_20230929044111	699.338	2	956.4	1	b9	35.23	0	0	0	light	243173457920	DGLDAASYYAPVR
DGLDAASYYAPVR	peptides1	230927_EXP_IBC_ulianaf_EXT_05_01_20230928202804	699.338	2	1027.44	1	b10	35.1	0	0	0	light	45739737088	DGLDAASYYAPVR
DGLDAASYYAPVR	peptides1	230927_EXP_IBC_ulianaf_EXT_05_02_20230928215838	699.338	2	1027.44	1	b10	35.23	0	0	0	light	45441601536	DGLDAASYYAPVR
DGLDAASYYAPVR	peptides1	230927_EXP_IBC_ulianaf_EXT_05_03_20230928232900	699.338	2	1027.44	1	b10	35.17	0	0	0	light	48493277184	DGLDAASYYAPVR
DGLDAASYYAPVR	peptides1	230927_EXP_IBC_ulianaf_EXT_05_05_20230929014031	699.338	2	1027.44	1	b10	35.3	0	0	0	light	214264692736	DGLDAASYYAPVR
DGLDAASYYAPVR	peptides1	230927_EXP_IBC_ulianaf_EXT_05_06_20230929031052	699.338	2	1027.44	1	b10	35.3	0	0	0	light	233341435904	DGLDAASYYAPVR
DGLDAASYYAPVR	peptides1	230927_EXP_IBC_ulianaf_EXT_05_07_20230929044111	699.338	2	1027.44	1	b10	35.23	0	0	0	light	243173457920	DGLDAASYYAPVR
DGLDAASYYAPVR	peptides1	230927_EXP_IBC_ulianaf_EXT_05_01_20230928202804	699.338	2	1124.49	1	b11	35.1	0	0	0	light	45739737088	DGLDAASYYAPVR
DGLDAASYYAPVR	peptides1	230927_EXP_IBC_ulianaf_EXT_05_02_20230928215838	699.338	2	1124.49	1	b11	35.23	0	0	0	light	45441601536	DGLDAASYYAPVR
DGLDAASYYAPVR	peptides1	230927_EXP_IBC_ulianaf_EXT_05_03_20230928232900	699.338	2	1124.49	1	b11	35.17	0	0	0	light	48493277184	DGLDAASYYAPVR
DGLDAASYYAPVR	peptides1	230927_EXP_IBC_ulianaf_EXT_05_05_20230929014031	699.338	2	1124.49	1	b11	35.3	0	0	0	light	214264692736	DGLDAASYYAPVR
DGLDAASYYAPVR	peptides1	230927_EXP_IBC_ulianaf_EXT_05_06_20230929031052	699.338	2	1124.49	1	b11	35.3	0	0	0	light	233341435904	DGLDAASYYAPVR
DGLDAASYYAPVR	peptides1	230927_EXP_IBC_ulianaf_EXT_05_07_20230929044111	699.338	2	1124.49	1	b11	35.23	0	0	0	light	243173457920	DGLDAASYYAPVR
DGLDAASYYAPVR	peptides1	230927_EXP_IBC_ulianaf_EXT_05_01_20230928202804	699.338	2	1223.56	1	b12	35.1	0	0	0	light	45739737088	DGLDAASYYAPVR
DGLDAASYYAPVR	peptides1	230927_EXP_IBC_ulianaf_EXT_05_02_20230928215838	699.338	2	1223.56	1	b12	35.23	0	0	0	light	45441601536	DGLDAASYYAPVR
DGLDAASYYAPVR	peptides1	230927_EXP_IBC_ulianaf_EXT_05_03_20230928232900	699.338	2	1223.56	1	b12	35.17	0	0	0	light	48493277184	DGLDAASYYAPVR
DGLDAASYYAPVR	peptides1	230927_EXP_IBC_ulianaf_EXT_05_05_20230929014031	699.338	2	1223.56	1	b12	35.3	0	0	0	light	214264692736	DGLDAASYYAPVR
DGLDAASYYAPVR	peptides1	230927_EXP_IBC_ulianaf_EXT_05_06_20230929031052	699.338	2	1223.56	1	b12	35.3	0	0	0	light	233341435904	DGLDAASYYAPVR
DGLDAASYYAPVR	peptides1	230927_EXP_IBC_ulianaf_EXT_05_07_20230929044111	699.338	2	1223.56	1	b12	35.23	0	0	0	light	243173457920	DGLDAASYYAPVR
ADVTPADFSEWSK	peptides1	230927_EXP_IBC_ulianaf_EXT_05_01_20230928202804	726.836	2	1266.6	1	y11	36.1	7021059	0	7	light	45739737088	ADVTPADFSEWSK
ADVTPADFSEWSK	peptides1	230927_EXP_IBC_ulianaf_EXT_05_02_20230928215838	726.836	2	1266.6	1	y11	36.17	7239910	0	7	light	45441601536	ADVTPADFSEWSK
ADVTPADFSEWSK	peptides1	230927_EXP_IBC_ulianaf_EXT_05_03_20230928232900	726.836	2	1266.6	1	y11	36.17	6362287	0	7	light	48493277184	ADVTPADFSEWSK
ADVTPADFSEWSK	peptides1	230927_EXP_IBC_ulianaf_EXT_05_05_20230929014031	726.836	2	1266.6	1	y11	36.17	5378241	0	7	light	214264692736	ADVTPADFSEWSK
ADVTPADFSEWSK	peptides1	230927_EXP_IBC_ulianaf_EXT_05_06_20230929031052	726.836	2	1266.6	1	y11	36.23	5468615	0	7	light	233341435904	ADVTPADFSEWSK
ADVTPADFSEWSK	peptides1	230927_EXP_IBC_ulianaf_EXT_05_07_20230929044111	726.836	2	1266.6	1	y11	36.23	5924821	0	7	light	243173457920	ADVTPADFSEWSK
ADVTPADFSEWSK	peptides1	230927_EXP_IBC_ulianaf_EXT_05_01_20230928202804	726.836	2	1167.53	1	y10	36.17	41511208	67507	6	light	45739737088	ADVTPADFSEWSK
ADVTPADFSEWSK	peptides1	230927_EXP_IBC_ulianaf_EXT_05_02_20230928215838	726.836	2	1167.53	1	y10	36.17	40961560	441634	6	light	45441601536	ADVTPADFSEWSK
ADVTPADFSEWSK	peptides1	230927_EXP_IBC_ulianaf_EXT_05_03_20230928232900	726.836	2	1167.53	1	y10	36.17	45798988	117817	6	light	48493277184	ADVTPADFSEWSK
ADVTPADFSEWSK	peptides1	230927_EXP_IBC_ulianaf_EXT_05_05_20230929014031	726.836	2	1167.53	1	y10	36.17	45033876	464753	6	light	214264692736	ADVTPADFSEWSK
ADVTPADFSEWSK	peptides1	230927_EXP_IBC_ulianaf_EXT_05_06_20230929031052	726.836	2	1167.53	1	y10	36.23	48917244	279830	6	light	233341435904	ADVTPADFSEWSK
ADVTPADFSEWSK	peptides1	230927_EXP_IBC_ulianaf_EXT_05_07_20230929044111	726.836	2	1167.53	1	y10	36.23	35326992	25413	6	light	243173457920	ADVTPADFSEWSK
ADVTPADFSEWSK	peptides1	230927_EXP_IBC_ulianaf_EXT_05_01_20230928202804	726.836	2	1066.48	1	y9	36.17	293276256	1551003	1	light	45739737088	ADVTPADFSEWSK
ADVTPADFSEWSK	peptides1	230927_EXP_IBC_ulianaf_EXT_05_02_20230928215838	726.836	2	1066.48	1	y9	36.17	272550080	2339287	1	light	45441601536	ADVTPADFSEWSK
ADVTPADFSEWSK	peptides1	230927_EXP_IBC_ulianaf_EXT_05_03_20230928232900	726.836	2	1066.48	1	y9	36.17	285871424	1659823	1	light	48493277184	ADVTPADFSEWSK
ADVTPADFSEWSK	peptides1	230927_EXP_IBC_ulianaf_EXT_05_05_20230929014031	726.836	2	1066.48	1	y9	36.17	296362048	2818823	1	light	214264692736	ADVTPADFSEWSK
ADVTPADFSEWSK	peptides1	230927_EXP_IBC_ulianaf_EXT_05_06_20230929031052	726.836	2	1066.48	1	y9	36.23	292173792	1938992	1	light	233341435904	ADVTPADFSEWSK
ADVTPADFSEWSK	peptides1	230927_EXP_IBC_ulianaf_EXT_05_07_20230929044111	726.836	2	1066.48	1	y9	36.23	242917568	1964263	1	light	243173457920	ADVTPADFSEWSK
ADVTPADFSEWSK	peptides1	230927_EXP_IBC_ulianaf_EXT_05_01_20230928202804	726.836	2	969.431	1	y8	36.17	90530832	82547	3	light	45739737088	ADVTPADFSEWSK
ADVTPADFSEWSK	peptides1	230927_EXP_IBC_ulianaf_EXT_05_02_20230928215838	726.836	2	969.431	1	y8	36.17	79282792	467916	4	light	45441601536	ADVTPADFSEWSK
ADVTPADFSEWSK	peptides1	230927_EXP_IBC_ulianaf_EXT_05_03_20230928232900	726.836	2	969.431	1	y8	36.17	90957928	426520	3	light	48493277184	ADVTPADFSEWSK
ADVTPADFSEWSK	peptides1	230927_EXP_IBC_ulianaf_EXT_05_05_20230929014031	726.836	2	969.431	1	y8	36.17	90609136	876417	3	light	214264692736	ADVTPADFSEWSK
ADVTPADFSEWSK	peptides1	230927_EXP_IBC_ulianaf_EXT_05_06_20230929031052	726.836	2	969.431	1	y8	36.17	78999416	385400	4	light	233341435904	ADVTPADFSEWSK
ADVTPADFSEWSK	peptides1	230927_EXP_IBC_ulianaf_EXT_05_07_20230929044111	726.836	2	969.431	1	y8	36.23	70547584	504848	3	light	243173457920	ADVTPADFSEWSK
ADVTPADFSEWSK	peptides1	230927_EXP_IBC_ulianaf_EXT_05_01_20230928202804	726.836	2	898.394	1	y7	36.17	84460520	475481	4	light	45739737088	ADVTPADFSEWSK
ADVTPADFSEWSK	peptides1	230927_EXP_IBC_ulianaf_EXT_05_02_20230928215838	726.836	2	898.394	1	y7	36.17	86931896	481023	3	light	45441601536	ADVTPADFSEWSK
ADVTPADFSEWSK	peptides1	230927_EXP_IBC_ulianaf_EXT_05_03_20230928232900	726.836	2	898.394	1	y7	36.17	89832424	486385	4	light	48493277184	ADVTPADFSEWSK
ADVTPADFSEWSK	peptides1	230927_EXP_IBC_ulianaf_EXT_05_05_20230929014031	726.836	2	898.394	1	y7	36.1	85585304	781840	4	light	214264692736	ADVTPADFSEWSK
ADVTPADFSEWSK	peptides1	230927_EXP_IBC_ulianaf_EXT_05_06_20230929031052	726.836	2	898.394	1	y7	36.23	85273736	460049	3	light	233341435904	ADVTPADFSEWSK
ADVTPADFSEWSK	peptides1	230927_EXP_IBC_ulianaf_EXT_05_07_20230929044111	726.836	2	898.394	1	y7	36.23	69239624	441184	4	light	243173457920	ADVTPADFSEWSK
ADVTPADFSEWSK	peptides1	230927_EXP_IBC_ulianaf_EXT_05_01_20230928202804	726.836	2	783.367	1	y6	36.17	71008440	61951	5	light	45739737088	ADVTPADFSEWSK
ADVTPADFSEWSK	peptides1	230927_EXP_IBC_ulianaf_EXT_05_02_20230928215838	726.836	2	783.367	1	y6	36.17	61392340	424162	5	light	45441601536	ADVTPADFSEWSK
ADVTPADFSEWSK	peptides1	230927_EXP_IBC_ulianaf_EXT_05_03_20230928232900	726.836	2	783.367	1	y6	36.17	64258456	356528	5	light	48493277184	ADVTPADFSEWSK
ADVTPADFSEWSK	peptides1	230927_EXP_IBC_ulianaf_EXT_05_05_20230929014031	726.836	2	783.367	1	y6	36.17	65819464	631535	5	light	214264692736	ADVTPADFSEWSK
ADVTPADFSEWSK	peptides1	230927_EXP_IBC_ulianaf_EXT_05_06_20230929031052	726.836	2	783.367	1	y6	36.17	60338700	295549	5	light	233341435904	ADVTPADFSEWSK
ADVTPADFSEWSK	peptides1	230927_EXP_IBC_ulianaf_EXT_05_07_20230929044111	726.836	2	783.367	1	y6	36.23	52581884	581860	5	light	243173457920	ADVTPADFSEWSK
ADVTPADFSEWSK	peptides1	230927_EXP_IBC_ulianaf_EXT_05_01_20230928202804	726.836	2	387.187	1	b4	36.17	112915552	563923	2	light	45739737088	ADVTPADFSEWSK
ADVTPADFSEWSK	peptides1	230927_EXP_IBC_ulianaf_EXT_05_02_20230928215838	726.836	2	387.187	1	b4	36.17	103069864	800887	2	light	45441601536	ADVTPADFSEWSK
ADVTPADFSEWSK	peptides1	230927_EXP_IBC_ulianaf_EXT_05_03_20230928232900	726.836	2	387.187	1	b4	36.17	114023360	587315	2	light	48493277184	ADVTPADFSEWSK
ADVTPADFSEWSK	peptides1	230927_EXP_IBC_ulianaf_EXT_05_05_20230929014031	726.836	2	387.187	1	b4	36.17	114296544	1049716	2	light	214264692736	ADVTPADFSEWSK
ADVTPADFSEWSK	peptides1	230927_EXP_IBC_ulianaf_EXT_05_06_20230929031052	726.836	2	387.187	1	b4	36.23	107017592	498247	2	light	233341435904	ADVTPADFSEWSK
ADVTPADFSEWSK	peptides1	230927_EXP_IBC_ulianaf_EXT_05_07_20230929044111	726.836	2	387.187	1	b4	36.23	90072448	661916	2	light	243173457920	ADVTPADFSEWSK
ADVTPADFSEWSK	peptides1	230927_EXP_IBC_ulianaf_EXT_05_01_20230928202804	726.836	2	817.373	1	b8	35.43	0	0	0	light	45739737088	ADVTPADFSEWSK
ADVTPADFSEWSK	peptides1	230927_EXP_IBC_ulianaf_EXT_05_02_20230928215838	726.836	2	817.373	1	b8	36.03	5206	0	8	light	45441601536	ADVTPADFSEWSK
ADVTPADFSEWSK	peptides1	230927_EXP_IBC_ulianaf_EXT_05_03_20230928232900	726.836	2	817.373	1	b8	35.97	0	0	0	light	48493277184	ADVTPADFSEWSK
ADVTPADFSEWSK	peptides1	230927_EXP_IBC_ulianaf_EXT_05_05_20230929014031	726.836	2	817.373	1	b8	35.63	0	0	0	light	214264692736	ADVTPADFSEWSK
ADVTPADFSEWSK	peptides1	230927_EXP_IBC_ulianaf_EXT_05_06_20230929031052	726.836	2	817.373	1	b8	35.57	0	0	0	light	233341435904	ADVTPADFSEWSK
ADVTPADFSEWSK	peptides1	230927_EXP_IBC_ulianaf_EXT_05_07_20230929044111	726.836	2	817.373	1	b8	35.63	0	0	0	light	243173457920	ADVTPADFSEWSK
ADVTPADFSEWSK	peptides1	230927_EXP_IBC_ulianaf_EXT_05_01_20230928202804	726.836	2	904.405	1	b9	35.43	0	0	0	light	45739737088	ADVTPADFSEWSK
ADVTPADFSEWSK	peptides1	230927_EXP_IBC_ulianaf_EXT_05_02_20230928215838	726.836	2	904.405	1	b9	35.57	0	0	0	light	45441601536	ADVTPADFSEWSK
ADVTPADFSEWSK	peptides1	230927_EXP_IBC_ulianaf_EXT_05_03_20230928232900	726.836	2	904.405	1	b9	35.97	0	0	0	light	48493277184	ADVTPADFSEWSK
ADVTPADFSEWSK	peptides1	230927_EXP_IBC_ulianaf_EXT_05_05_20230929014031	726.836	2	904.405	1	b9	35.63	0	0	0	light	214264692736	ADVTPADFSEWSK
ADVTPADFSEWSK	peptides1	230927_EXP_IBC_ulianaf_EXT_05_06_20230929031052	726.836	2	904.405	1	b9	35.57	0	0	0	light	233341435904	ADVTPADFSEWSK
ADVTPADFSEWSK	peptides1	230927_EXP_IBC_ulianaf_EXT_05_07_20230929044111	726.836	2	904.405	1	b9	35.63	0	0	0	light	243173457920	ADVTPADFSEWSK
ADVTPADFSEWSK	peptides1	230927_EXP_IBC_ulianaf_EXT_05_01_20230928202804	726.836	2	1033.45	1	b10	35.43	0	0	0	light	45739737088	ADVTPADFSEWSK
ADVTPADFSEWSK	peptides1	230927_EXP_IBC_ulianaf_EXT_05_02_20230928215838	726.836	2	1033.45	1	b10	35.57	0	0	0	light	45441601536	ADVTPADFSEWSK
ADVTPADFSEWSK	peptides1	230927_EXP_IBC_ulianaf_EXT_05_03_20230928232900	726.836	2	1033.45	1	b10	35.97	0	0	0	light	48493277184	ADVTPADFSEWSK
ADVTPADFSEWSK	peptides1	230927_EXP_IBC_ulianaf_EXT_05_05_20230929014031	726.836	2	1033.45	1	b10	35.63	0	0	0	light	214264692736	ADVTPADFSEWSK
ADVTPADFSEWSK	peptides1	230927_EXP_IBC_ulianaf_EXT_05_06_20230929031052	726.836	2	1033.45	1	b10	35.57	0	0	0	light	233341435904	ADVTPADFSEWSK
ADVTPADFSEWSK	peptides1	230927_EXP_IBC_ulianaf_EXT_05_07_20230929044111	726.836	2	1033.45	1	b10	35.63	0	0	0	light	243173457920	ADVTPADFSEWSK
ADVTPADFSEWSK	peptides1	230927_EXP_IBC_ulianaf_EXT_05_01_20230928202804	726.836	2	1219.53	1	b11	35.43	0	0	0	light	45739737088	ADVTPADFSEWSK
ADVTPADFSEWSK	peptides1	230927_EXP_IBC_ulianaf_EXT_05_02_20230928215838	726.836	2	1219.53	1	b11	35.57	0	0	0	light	45441601536	ADVTPADFSEWSK
ADVTPADFSEWSK	peptides1	230927_EXP_IBC_ulianaf_EXT_05_03_20230928232900	726.836	2	1219.53	1	b11	35.97	0	0	0	light	48493277184	ADVTPADFSEWSK
ADVTPADFSEWSK	peptides1	230927_EXP_IBC_ulianaf_EXT_05_05_20230929014031	726.836	2	1219.53	1	b11	35.63	0	0	0	light	214264692736	ADVTPADFSEWSK
ADVTPADFSEWSK	peptides1	230927_EXP_IBC_ulianaf_EXT_05_06_20230929031052	726.836	2	1219.53	1	b11	35.57	0	0	0	light	233341435904	ADVTPADFSEWSK
ADVTPADFSEWSK	peptides1	230927_EXP_IBC_ulianaf_EXT_05_07_20230929044111	726.836	2	1219.53	1	b11	35.63	0	0	0	light	243173457920	ADVTPADFSEWSK
ADVTPADFSEWSK	peptides1	230927_EXP_IBC_ulianaf_EXT_05_01_20230928202804	726.836	2	1306.56	1	b12	35.43	0	0	0	light	45739737088	ADVTPADFSEWSK
ADVTPADFSEWSK	peptides1	230927_EXP_IBC_ulianaf_EXT_05_02_20230928215838	726.836	2	1306.56	1	b12	35.57	0	0	0	light	45441601536	ADVTPADFSEWSK
ADVTPADFSEWSK	peptides1	230927_EXP_IBC_ulianaf_EXT_05_03_20230928232900	726.836	2	1306.56	1	b12	35.97	0	0	0	light	48493277184	ADVTPADFSEWSK
ADVTPADFSEWSK	peptides1	230927_EXP_IBC_ulianaf_EXT_05_05_20230929014031	726.836	2	1306.56	1	b12	35.63	0	0	0	light	214264692736	ADVTPADFSEWSK
ADVTPADFSEWSK	peptides1	230927_EXP_IBC_ulianaf_EXT_05_06_20230929031052	726.836	2	1306.56	1	b12	35.57	0	0	0	light	233341435904	ADVTPADFSEWSK
ADVTPADFSEWSK	peptides1	230927_EXP_IBC_ulianaf_EXT_05_07_20230929044111	726.836	2	1306.56	1	b12	35.63	0	0	0	light	243173457920	ADVTPADFSEWSK
GTFIIDPGGVIR	peptides1	230927_EXP_IBC_ulianaf_EXT_05_01_20230928202804	622.854	2	1187.68	1	y11	42.24	0	0	0	light	45739737088	GTFIIDPGGVIR
GTFIIDPGGVIR	peptides1	230927_EXP_IBC_ulianaf_EXT_05_02_20230928215838	622.854	2	1187.68	1	y11	42.29	0	0	0	light	45441601536	GTFIIDPGGVIR
GTFIIDPGGVIR	peptides1	230927_EXP_IBC_ulianaf_EXT_05_03_20230928232900	622.854	2	1187.68	1	y11	42.3	0	0	0	light	48493277184	GTFIIDPGGVIR
GTFIIDPGGVIR	peptides1	230927_EXP_IBC_ulianaf_EXT_05_05_20230929014031	622.854	2	1187.68	1	y11	42.3	0	0	0	light	214264692736	GTFIIDPGGVIR
GTFIIDPGGVIR	peptides1	230927_EXP_IBC_ulianaf_EXT_05_06_20230929031052	622.854	2	1187.68	1	y11	42.37	0	0	0	light	233341435904	GTFIIDPGGVIR
GTFIIDPGGVIR	peptides1	230927_EXP_IBC_ulianaf_EXT_05_07_20230929044111	622.854	2	1187.68	1	y11	42.37	0	0	0	light	243173457920	GTFIIDPGGVIR
GTFIIDPGGVIR	peptides1	230927_EXP_IBC_ulianaf_EXT_05_01_20230928202804	622.854	2	1086.63	1	y10	42.44	4745699	0	5	light	45739737088	GTFIIDPGGVIR
GTFIIDPGGVIR	peptides1	230927_EXP_IBC_ulianaf_EXT_05_02_20230928215838	622.854	2	1086.63	1	y10	42.56	4976270	0	5	light	45441601536	GTFIIDPGGVIR
GTFIIDPGGVIR	peptides1	230927_EXP_IBC_ulianaf_EXT_05_03_20230928232900	622.854	2	1086.63	1	y10	42.57	5060204	0	5	light	48493277184	GTFIIDPGGVIR
GTFIIDPGGVIR	peptides1	230927_EXP_IBC_ulianaf_EXT_05_05_20230929014031	622.854	2	1086.63	1	y10	42.5	4216499	0	5	light	214264692736	GTFIIDPGGVIR
GTFIIDPGGVIR	peptides1	230927_EXP_IBC_ulianaf_EXT_05_06_20230929031052	622.854	2	1086.63	1	y10	42.57	4727146	0	5	light	233341435904	GTFIIDPGGVIR
GTFIIDPGGVIR	peptides1	230927_EXP_IBC_ulianaf_EXT_05_07_20230929044111	622.854	2	1086.63	1	y10	42.64	3325493	0	5	light	243173457920	GTFIIDPGGVIR
GTFIIDPGGVIR	peptides1	230927_EXP_IBC_ulianaf_EXT_05_01_20230928202804	622.854	2	939.562	1	y9	42.44	18289392	56492	4	light	45739737088	GTFIIDPGGVIR
GTFIIDPGGVIR	peptides1	230927_EXP_IBC_ulianaf_EXT_05_02_20230928215838	622.854	2	939.562	1	y9	42.56	16829844	29571	4	light	45441601536	GTFIIDPGGVIR
GTFIIDPGGVIR	peptides1	230927_EXP_IBC_ulianaf_EXT_05_03_20230928232900	622.854	2	939.562	1	y9	42.57	20252636	0	4	light	48493277184	GTFIIDPGGVIR
GTFIIDPGGVIR	peptides1	230927_EXP_IBC_ulianaf_EXT_05_05_20230929014031	622.854	2	939.562	1	y9	42.5	15522325	0	4	light	214264692736	GTFIIDPGGVIR
GTFIIDPGGVIR	peptides1	230927_EXP_IBC_ulianaf_EXT_05_06_20230929031052	622.854	2	939.562	1	y9	42.57	19334288	28848	4	light	233341435904	GTFIIDPGGVIR
GTFIIDPGGVIR	peptides1	230927_EXP_IBC_ulianaf_EXT_05_07_20230929044111	622.854	2	939.562	1	y9	42.64	14749170	0	4	light	243173457920	GTFIIDPGGVIR
GTFIIDPGGVIR	peptides1	230927_EXP_IBC_ulianaf_EXT_05_01_20230928202804	622.854	2	826.478	1	y8	42.44	70251232	246478	2	light	45739737088	GTFIIDPGGVIR
GTFIIDPGGVIR	peptides1	230927_EXP_IBC_ulianaf_EXT_05_02_20230928215838	622.854	2	826.478	1	y8	42.56	64989556	171086	2	light	45441601536	GTFIIDPGGVIR
GTFIIDPGGVIR	peptides1	230927_EXP_IBC_ulianaf_EXT_05_03_20230928232900	622.854	2	826.478	1	y8	42.57	70245552	0	2	light	48493277184	GTFIIDPGGVIR
GTFIIDPGGVIR	peptides1	230927_EXP_IBC_ulianaf_EXT_05_05_20230929014031	622.854	2	826.478	1	y8	42.5	64154780	199986	2	light	214264692736	GTFIIDPGGVIR
GTFIIDPGGVIR	peptides1	230927_EXP_IBC_ulianaf_EXT_05_06_20230929031052	622.854	2	826.478	1	y8	42.57	73736480	111308	2	light	233341435904	GTFIIDPGGVIR
GTFIIDPGGVIR	peptides1	230927_EXP_IBC_ulianaf_EXT_05_07_20230929044111	622.854	2	826.478	1	y8	42.64	54902176	0	2	light	243173457920	GTFIIDPGGVIR
GTFIIDPGGVIR	peptides1	230927_EXP_IBC_ulianaf_EXT_05_01_20230928202804	622.854	2	713.394	1	y7	42.44	54947476	122105	3	light	45739737088	GTFIIDPGGVIR
GTFIIDPGGVIR	peptides1	230927_EXP_IBC_ulianaf_EXT_05_02_20230928215838	622.854	2	713.394	1	y7	42.56	48819840	107820	3	light	45441601536	GTFIIDPGGVIR
GTFIIDPGGVIR	peptides1	230927_EXP_IBC_ulianaf_EXT_05_03_20230928232900	622.854	2	713.394	1	y7	42.57	52297380	0	3	light	48493277184	GTFIIDPGGVIR
GTFIIDPGGVIR	peptides1	230927_EXP_IBC_ulianaf_EXT_05_05_20230929014031	622.854	2	713.394	1	y7	42.5	49750568	191924	3	light	214264692736	GTFIIDPGGVIR
GTFIIDPGGVIR	peptides1	230927_EXP_IBC_ulianaf_EXT_05_06_20230929031052	622.854	2	713.394	1	y7	42.57	57349040	91878	3	light	233341435904	GTFIIDPGGVIR
GTFIIDPGGVIR	peptides1	230927_EXP_IBC_ulianaf_EXT_05_07_20230929044111	622.854	2	713.394	1	y7	42.64	42865688	18812	3	light	243173457920	GTFIIDPGGVIR
GTFIIDPGGVIR	peptides1	230927_EXP_IBC_ulianaf_EXT_05_01_20230928202804	622.854	2	598.367	1	y6	42.44	239964272	668220	1	light	45739737088	GTFIIDPGGVIR
GTFIIDPGGVIR	peptides1	230927_EXP_IBC_ulianaf_EXT_05_02_20230928215838	622.854	2	598.367	1	y6	42.56	222208832	499204	1	light	45441601536	GTFIIDPGGVIR
GTFIIDPGGVIR	peptides1	230927_EXP_IBC_ulianaf_EXT_05_03_20230928232900	622.854	2	598.367	1	y6	42.57	231126352	0	1	light	48493277184	GTFIIDPGGVIR
GTFIIDPGGVIR	peptides1	230927_EXP_IBC_ulianaf_EXT_05_05_20230929014031	622.854	2	598.367	1	y6	42.5	213477712	876959	1	light	214264692736	GTFIIDPGGVIR
GTFIIDPGGVIR	peptides1	230927_EXP_IBC_ulianaf_EXT_05_06_20230929031052	622.854	2	598.367	1	y6	42.57	249703184	991674	1	light	233341435904	GTFIIDPGGVIR
GTFIIDPGGVIR	peptides1	230927_EXP_IBC_ulianaf_EXT_05_07_20230929044111	622.854	2	598.367	1	y6	42.64	186203968	36989	1	light	243173457920	GTFIIDPGGVIR
GTFIIDPGGVIR	peptides1	230927_EXP_IBC_ulianaf_EXT_05_01_20230928202804	622.854	2	647.34	1	b6	42.24	0	0	0	light	45739737088	GTFIIDPGGVIR
GTFIIDPGGVIR	peptides1	230927_EXP_IBC_ulianaf_EXT_05_02_20230928215838	622.854	2	647.34	1	b6	42.29	0	0	0	light	45441601536	GTFIIDPGGVIR
GTFIIDPGGVIR	peptides1	230927_EXP_IBC_ulianaf_EXT_05_03_20230928232900	622.854	2	647.34	1	b6	42.3	0	0	0	light	48493277184	GTFIIDPGGVIR
GTFIIDPGGVIR	peptides1	230927_EXP_IBC_ulianaf_EXT_05_05_20230929014031	622.854	2	647.34	1	b6	42.3	0	0	0	light	214264692736	GTFIIDPGGVIR
GTFIIDPGGVIR	peptides1	230927_EXP_IBC_ulianaf_EXT_05_06_20230929031052	622.854	2	647.34	1	b6	42.37	0	0	0	light	233341435904	GTFIIDPGGVIR
GTFIIDPGGVIR	peptides1	230927_EXP_IBC_ulianaf_EXT_05_07_20230929044111	622.854	2	647.34	1	b6	42.37	0	0	0	light	243173457920	GTFIIDPGGVIR
GTFIIDPGGVIR	peptides1	230927_EXP_IBC_ulianaf_EXT_05_01_20230928202804	622.854	2	744.393	1	b7	42.24	0	0	0	light	45739737088	GTFIIDPGGVIR
GTFIIDPGGVIR	peptides1	230927_EXP_IBC_ulianaf_EXT_05_02_20230928215838	622.854	2	744.393	1	b7	42.29	0	0	0	light	45441601536	GTFIIDPGGVIR
GTFIIDPGGVIR	peptides1	230927_EXP_IBC_ulianaf_EXT_05_03_20230928232900	622.854	2	744.393	1	b7	42.3	0	0	0	light	48493277184	GTFIIDPGGVIR
GTFIIDPGGVIR	peptides1	230927_EXP_IBC_ulianaf_EXT_05_05_20230929014031	622.854	2	744.393	1	b7	42.3	0	0	0	light	214264692736	GTFIIDPGGVIR
GTFIIDPGGVIR	peptides1	230927_EXP_IBC_ulianaf_EXT_05_06_20230929031052	622.854	2	744.393	1	b7	42.37	0	0	0	light	233341435904	GTFIIDPGGVIR
GTFIIDPGGVIR	peptides1	230927_EXP_IBC_ulianaf_EXT_05_07_20230929044111	622.854	2	744.393	1	b7	42.37	0	0	0	light	243173457920	GTFIIDPGGVIR
GTFIIDPGGVIR	peptides1	230927_EXP_IBC_ulianaf_EXT_05_01_20230928202804	622.854	2	801.414	1	b8	42.24	0	0	0	light	45739737088	GTFIIDPGGVIR
GTFIIDPGGVIR	peptides1	230927_EXP_IBC_ulianaf_EXT_05_02_20230928215838	622.854	2	801.414	1	b8	42.29	0	0	0	light	45441601536	GTFIIDPGGVIR
GTFIIDPGGVIR	peptides1	230927_EXP_IBC_ulianaf_EXT_05_03_20230928232900	622.854	2	801.414	1	b8	42.3	0	0	0	light	48493277184	GTFIIDPGGVIR
GTFIIDPGGVIR	peptides1	230927_EXP_IBC_ulianaf_EXT_05_05_20230929014031	622.854	2	801.414	1	b8	42.3	0	0	0	light	214264692736	GTFIIDPGGVIR
GTFIIDPGGVIR	peptides1	230927_EXP_IBC_ulianaf_EXT_05_06_20230929031052	622.854	2	801.414	1	b8	42.37	0	0	0	light	233341435904	GTFIIDPGGVIR
GTFIIDPGGVIR	peptides1	230927_EXP_IBC_ulianaf_EXT_05_07_20230929044111	622.854	2	801.414	1	b8	42.37	0	0	0	light	243173457920	GTFIIDPGGVIR
GTFIIDPGGVIR	peptides1	230927_EXP_IBC_ulianaf_EXT_05_01_20230928202804	622.854	2	858.436	1	b9	42.24	0	0	0	light	45739737088	GTFIIDPGGVIR
GTFIIDPGGVIR	peptides1	230927_EXP_IBC_ulianaf_EXT_05_02_20230928215838	622.854	2	858.436	1	b9	42.29	0	0	0	light	45441601536	GTFIIDPGGVIR
GTFIIDPGGVIR	peptides1	230927_EXP_IBC_ulianaf_EXT_05_03_20230928232900	622.854	2	858.436	1	b9	42.3	0	0	0	light	48493277184	GTFIIDPGGVIR
GTFIIDPGGVIR	peptides1	230927_EXP_IBC_ulianaf_EXT_05_05_20230929014031	622.854	2	858.436	1	b9	42.3	0	0	0	light	214264692736	GTFIIDPGGVIR
GTFIIDPGGVIR	peptides1	230927_EXP_IBC_ulianaf_EXT_05_06_20230929031052	622.854	2	858.436	1	b9	42.37	0	0	0	light	233341435904	GTFIIDPGGVIR
GTFIIDPGGVIR	peptides1	230927_EXP_IBC_ulianaf_EXT_05_07_20230929044111	622.854	2	858.436	1	b9	42.37	0	0	0	light	243173457920	GTFIIDPGGVIR
GTFIIDPGGVIR	peptides1	230927_EXP_IBC_ulianaf_EXT_05_01_20230928202804	622.854	2	957.504	1	b10	42.24	0	0	0	light	45739737088	GTFIIDPGGVIR
GTFIIDPGGVIR	peptides1	230927_EXP_IBC_ulianaf_EXT_05_02_20230928215838	622.854	2	957.504	1	b10	42.29	0	0	0	light	45441601536	GTFIIDPGGVIR
GTFIIDPGGVIR	peptides1	230927_EXP_IBC_ulianaf_EXT_05_03_20230928232900	622.854	2	957.504	1	b10	42.3	0	0	0	light	48493277184	GTFIIDPGGVIR
GTFIIDPGGVIR	peptides1	230927_EXP_IBC_ulianaf_EXT_05_05_20230929014031	622.854	2	957.504	1	b10	42.3	0	0	0	light	214264692736	GTFIIDPGGVIR
GTFIIDPGGVIR	peptides1	230927_EXP_IBC_ulianaf_EXT_05_06_20230929031052	622.854	2	957.504	1	b10	42.37	0	0	0	light	233341435904	GTFIIDPGGVIR
GTFIIDPGGVIR	peptides1	230927_EXP_IBC_ulianaf_EXT_05_07_20230929044111	622.854	2	957.504	1	b10	42.37	0	0	0	light	243173457920	GTFIIDPGGVIR
GTFIIDPGGVIR	peptides1	230927_EXP_IBC_ulianaf_EXT_05_01_20230928202804	622.854	2	1070.59	1	b11	42.24	0	0	0	light	45739737088	GTFIIDPGGVIR
GTFIIDPGGVIR	peptides1	230927_EXP_IBC_ulianaf_EXT_05_02_20230928215838	622.854	2	1070.59	1	b11	42.29	0	0	0	light	45441601536	GTFIIDPGGVIR
GTFIIDPGGVIR	peptides1	230927_EXP_IBC_ulianaf_EXT_05_03_20230928232900	622.854	2	1070.59	1	b11	42.3	0	0	0	light	48493277184	GTFIIDPGGVIR
GTFIIDPGGVIR	peptides1	230927_EXP_IBC_ulianaf_EXT_05_05_20230929014031	622.854	2	1070.59	1	b11	42.3	0	0	0	light	214264692736	GTFIIDPGGVIR
GTFIIDPGGVIR	peptides1	230927_EXP_IBC_ulianaf_EXT_05_06_20230929031052	622.854	2	1070.59	1	b11	42.37	0	0	0	light	233341435904	GTFIIDPGGVIR
GTFIIDPGGVIR	peptides1	230927_EXP_IBC_ulianaf_EXT_05_07_20230929044111	622.854	2	1070.59	1	b11	42.37	0	0	0	light	243173457920	GTFIIDPGGVIR
GTFIIDPAAVIR	peptides1	230927_EXP_IBC_ulianaf_EXT_05_01_20230928202804	636.869	2	1215.71	1	y11	46.91	0	0	0	light	45739737088	GTFIIDPAAVIR
GTFIIDPAAVIR	peptides1	230927_EXP_IBC_ulianaf_EXT_05_02_20230928215838	636.869	2	1215.71	1	y11	46.96	0	0	0	light	45441601536	GTFIIDPAAVIR
GTFIIDPAAVIR	peptides1	230927_EXP_IBC_ulianaf_EXT_05_03_20230928232900	636.869	2	1215.71	1	y11	47.04	0	0	0	light	48493277184	GTFIIDPAAVIR
GTFIIDPAAVIR	peptides1	230927_EXP_IBC_ulianaf_EXT_05_05_20230929014031	636.869	2	1215.71	1	y11	46.97	0	0	0	light	214264692736	GTFIIDPAAVIR
GTFIIDPAAVIR	peptides1	230927_EXP_IBC_ulianaf_EXT_05_06_20230929031052	636.869	2	1215.71	1	y11	47.04	0	0	0	light	233341435904	GTFIIDPAAVIR
GTFIIDPAAVIR	peptides1	230927_EXP_IBC_ulianaf_EXT_05_07_20230929044111	636.869	2	1215.71	1	y11	47.04	0	0	0	light	243173457920	GTFIIDPAAVIR
GTFIIDPAAVIR	peptides1	230927_EXP_IBC_ulianaf_EXT_05_01_20230928202804	636.869	2	1114.66	1	y10	47.17	17059832	0	5	light	45739737088	GTFIIDPAAVIR
GTFIIDPAAVIR	peptides1	230927_EXP_IBC_ulianaf_EXT_05_02_20230928215838	636.869	2	1114.66	1	y10	47.29	15550046	0	5	light	45441601536	GTFIIDPAAVIR
GTFIIDPAAVIR	peptides1	230927_EXP_IBC_ulianaf_EXT_05_03_20230928232900	636.869	2	1114.66	1	y10	47.31	15612622	0	5	light	48493277184	GTFIIDPAAVIR
GTFIIDPAAVIR	peptides1	230927_EXP_IBC_ulianaf_EXT_05_05_20230929014031	636.869	2	1114.66	1	y10	47.24	13117551	0	5	light	214264692736	GTFIIDPAAVIR
GTFIIDPAAVIR	peptides1	230927_EXP_IBC_ulianaf_EXT_05_06_20230929031052	636.869	2	1114.66	1	y10	47.31	13612572	0	5	light	233341435904	GTFIIDPAAVIR
GTFIIDPAAVIR	peptides1	230927_EXP_IBC_ulianaf_EXT_05_07_20230929044111	636.869	2	1114.66	1	y10	47.37	11417436	0	5	light	243173457920	GTFIIDPAAVIR
GTFIIDPAAVIR	peptides1	230927_EXP_IBC_ulianaf_EXT_05_01_20230928202804	636.869	2	967.593	1	y9	47.17	84815976	0	4	light	45739737088	GTFIIDPAAVIR
GTFIIDPAAVIR	peptides1	230927_EXP_IBC_ulianaf_EXT_05_02_20230928215838	636.869	2	967.593	1	y9	47.29	59412520	0	4	light	45441601536	GTFIIDPAAVIR
GTFIIDPAAVIR	peptides1	230927_EXP_IBC_ulianaf_EXT_05_03_20230928232900	636.869	2	967.593	1	y9	47.31	61648588	0	4	light	48493277184	GTFIIDPAAVIR
GTFIIDPAAVIR	peptides1	230927_EXP_IBC_ulianaf_EXT_05_05_20230929014031	636.869	2	967.593	1	y9	47.24	52734976	0	4	light	214264692736	GTFIIDPAAVIR
GTFIIDPAAVIR	peptides1	230927_EXP_IBC_ulianaf_EXT_05_06_20230929031052	636.869	2	967.593	1	y9	47.31	65579152	0	4	light	233341435904	GTFIIDPAAVIR
GTFIIDPAAVIR	peptides1	230927_EXP_IBC_ulianaf_EXT_05_07_20230929044111	636.869	2	967.593	1	y9	47.37	53128752	0	4	light	243173457920	GTFIIDPAAVIR
GTFIIDPAAVIR	peptides1	230927_EXP_IBC_ulianaf_EXT_05_01_20230928202804	636.869	2	854.509	1	y8	47.17	341866112	0	2	light	45739737088	GTFIIDPAAVIR
GTFIIDPAAVIR	peptides1	230927_EXP_IBC_ulianaf_EXT_05_02_20230928215838	636.869	2	854.509	1	y8	47.29	295878784	0	2	light	45441601536	GTFIIDPAAVIR
GTFIIDPAAVIR	peptides1	230927_EXP_IBC_ulianaf_EXT_05_03_20230928232900	636.869	2	854.509	1	y8	47.31	292560096	180132	2	light	48493277184	GTFIIDPAAVIR
GTFIIDPAAVIR	peptides1	230927_EXP_IBC_ulianaf_EXT_05_05_20230929014031	636.869	2	854.509	1	y8	47.24	263645056	0	2	light	214264692736	GTFIIDPAAVIR
GTFIIDPAAVIR	peptides1	230927_EXP_IBC_ulianaf_EXT_05_06_20230929031052	636.869	2	854.509	1	y8	47.31	264931584	0	2	light	233341435904	GTFIIDPAAVIR
GTFIIDPAAVIR	peptides1	230927_EXP_IBC_ulianaf_EXT_05_07_20230929044111	636.869	2	854.509	1	y8	47.37	225575424	0	2	light	243173457920	GTFIIDPAAVIR
GTFIIDPAAVIR	peptides1	230927_EXP_IBC_ulianaf_EXT_05_01_20230928202804	636.869	2	741.425	1	y7	47.17	259857408	75044	3	light	45739737088	GTFIIDPAAVIR
GTFIIDPAAVIR	peptides1	230927_EXP_IBC_ulianaf_EXT_05_02_20230928215838	636.869	2	741.425	1	y7	47.29	221823520	0	3	light	45441601536	GTFIIDPAAVIR
GTFIIDPAAVIR	peptides1	230927_EXP_IBC_ulianaf_EXT_05_03_20230928232900	636.869	2	741.425	1	y7	47.31	228244416	111133	3	light	48493277184	GTFIIDPAAVIR
GTFIIDPAAVIR	peptides1	230927_EXP_IBC_ulianaf_EXT_05_05_20230929014031	636.869	2	741.425	1	y7	47.24	196927648	18706	3	light	214264692736	GTFIIDPAAVIR
GTFIIDPAAVIR	peptides1	230927_EXP_IBC_ulianaf_EXT_05_06_20230929031052	636.869	2	741.425	1	y7	47.31	199794208	0	3	light	233341435904	GTFIIDPAAVIR
GTFIIDPAAVIR	peptides1	230927_EXP_IBC_ulianaf_EXT_05_07_20230929044111	636.869	2	741.425	1	y7	47.37	174692512	249147	3	light	243173457920	GTFIIDPAAVIR
GTFIIDPAAVIR	peptides1	230927_EXP_IBC_ulianaf_EXT_05_01_20230928202804	636.869	2	626.398	1	y6	47.17	772619072	135169	1	light	45739737088	GTFIIDPAAVIR
GTFIIDPAAVIR	peptides1	230927_EXP_IBC_ulianaf_EXT_05_02_20230928215838	636.869	2	626.398	1	y6	47.29	659702144	56797	1	light	45441601536	GTFIIDPAAVIR
GTFIIDPAAVIR	peptides1	230927_EXP_IBC_ulianaf_EXT_05_03_20230928232900	636.869	2	626.398	1	y6	47.31	658921920	321145	1	light	48493277184	GTFIIDPAAVIR
GTFIIDPAAVIR	peptides1	230927_EXP_IBC_ulianaf_EXT_05_05_20230929014031	636.869	2	626.398	1	y6	47.24	611744768	40001	1	light	214264692736	GTFIIDPAAVIR
GTFIIDPAAVIR	peptides1	230927_EXP_IBC_ulianaf_EXT_05_06_20230929031052	636.869	2	626.398	1	y6	47.31	614588608	0	1	light	233341435904	GTFIIDPAAVIR
GTFIIDPAAVIR	peptides1	230927_EXP_IBC_ulianaf_EXT_05_07_20230929044111	636.869	2	626.398	1	y6	47.37	518354848	1460894	1	light	243173457920	GTFIIDPAAVIR
GTFIIDPAAVIR	peptides1	230927_EXP_IBC_ulianaf_EXT_05_01_20230928202804	636.869	2	647.34	1	b6	46.91	0	0	0	light	45739737088	GTFIIDPAAVIR
GTFIIDPAAVIR	peptides1	230927_EXP_IBC_ulianaf_EXT_05_02_20230928215838	636.869	2	647.34	1	b6	46.96	0	0	0	light	45441601536	GTFIIDPAAVIR
GTFIIDPAAVIR	peptides1	230927_EXP_IBC_ulianaf_EXT_05_03_20230928232900	636.869	2	647.34	1	b6	47.04	0	0	0	light	48493277184	GTFIIDPAAVIR
GTFIIDPAAVIR	peptides1	230927_EXP_IBC_ulianaf_EXT_05_05_20230929014031	636.869	2	647.34	1	b6	46.97	0	0	0	light	214264692736	GTFIIDPAAVIR
GTFIIDPAAVIR	peptides1	230927_EXP_IBC_ulianaf_EXT_05_06_20230929031052	636.869	2	647.34	1	b6	47.04	0	0	0	light	233341435904	GTFIIDPAAVIR
GTFIIDPAAVIR	peptides1	230927_EXP_IBC_ulianaf_EXT_05_07_20230929044111	636.869	2	647.34	1	b6	47.04	0	0	0	light	243173457920	GTFIIDPAAVIR
GTFIIDPAAVIR	peptides1	230927_EXP_IBC_ulianaf_EXT_05_01_20230928202804	636.869	2	744.393	1	b7	46.91	0	0	0	light	45739737088	GTFIIDPAAVIR
GTFIIDPAAVIR	peptides1	230927_EXP_IBC_ulianaf_EXT_05_02_20230928215838	636.869	2	744.393	1	b7	46.96	0	0	0	light	45441601536	GTFIIDPAAVIR
GTFIIDPAAVIR	peptides1	230927_EXP_IBC_ulianaf_EXT_05_03_20230928232900	636.869	2	744.393	1	b7	47.04	0	0	0	light	48493277184	GTFIIDPAAVIR
GTFIIDPAAVIR	peptides1	230927_EXP_IBC_ulianaf_EXT_05_05_20230929014031	636.869	2	744.393	1	b7	46.97	0	0	0	light	214264692736	GTFIIDPAAVIR
GTFIIDPAAVIR	peptides1	230927_EXP_IBC_ulianaf_EXT_05_06_20230929031052	636.869	2	744.393	1	b7	47.04	0	0	0	light	233341435904	GTFIIDPAAVIR
GTFIIDPAAVIR	peptides1	230927_EXP_IBC_ulianaf_EXT_05_07_20230929044111	636.869	2	744.393	1	b7	47.04	0	0	0	light	243173457920	GTFIIDPAAVIR
GTFIIDPAAVIR	peptides1	230927_EXP_IBC_ulianaf_EXT_05_01_20230928202804	636.869	2	815.43	1	b8	46.91	0	0	0	light	45739737088	GTFIIDPAAVIR
GTFIIDPAAVIR	peptides1	230927_EXP_IBC_ulianaf_EXT_05_02_20230928215838	636.869	2	815.43	1	b8	46.96	0	0	0	light	45441601536	GTFIIDPAAVIR
GTFIIDPAAVIR	peptides1	230927_EXP_IBC_ulianaf_EXT_05_03_20230928232900	636.869	2	815.43	1	b8	47.04	0	0	0	light	48493277184	GTFIIDPAAVIR
GTFIIDPAAVIR	peptides1	230927_EXP_IBC_ulianaf_EXT_05_05_20230929014031	636.869	2	815.43	1	b8	46.97	0	0	0	light	214264692736	GTFIIDPAAVIR
GTFIIDPAAVIR	peptides1	230927_EXP_IBC_ulianaf_EXT_05_06_20230929031052	636.869	2	815.43	1	b8	47.04	0	0	0	light	233341435904	GTFIIDPAAVIR
GTFIIDPAAVIR	peptides1	230927_EXP_IBC_ulianaf_EXT_05_07_20230929044111	636.869	2	815.43	1	b8	47.04	0	0	0	light	243173457920	GTFIIDPAAVIR
GTFIIDPAAVIR	peptides1	230927_EXP_IBC_ulianaf_EXT_05_01_20230928202804	636.869	2	886.467	1	b9	46.91	0	0	0	light	45739737088	GTFIIDPAAVIR
GTFIIDPAAVIR	peptides1	230927_EXP_IBC_ulianaf_EXT_05_02_20230928215838	636.869	2	886.467	1	b9	46.96	0	0	0	light	45441601536	GTFIIDPAAVIR
GTFIIDPAAVIR	peptides1	230927_EXP_IBC_ulianaf_EXT_05_03_20230928232900	636.869	2	886.467	1	b9	47.04	0	0	0	light	48493277184	GTFIIDPAAVIR
GTFIIDPAAVIR	peptides1	230927_EXP_IBC_ulianaf_EXT_05_05_20230929014031	636.869	2	886.467	1	b9	46.97	0	0	0	light	214264692736	GTFIIDPAAVIR
GTFIIDPAAVIR	peptides1	230927_EXP_IBC_ulianaf_EXT_05_06_20230929031052	636.869	2	886.467	1	b9	47.04	0	0	0	light	233341435904	GTFIIDPAAVIR
GTFIIDPAAVIR	peptides1	230927_EXP_IBC_ulianaf_EXT_05_07_20230929044111	636.869	2	886.467	1	b9	47.04	0	0	0	light	243173457920	GTFIIDPAAVIR
GTFIIDPAAVIR	peptides1	230927_EXP_IBC_ulianaf_EXT_05_01_20230928202804	636.869	2	985.535	1	b10	46.91	0	0	0	light	45739737088	GTFIIDPAAVIR
GTFIIDPAAVIR	peptides1	230927_EXP_IBC_ulianaf_EXT_05_02_20230928215838	636.869	2	985.535	1	b10	46.96	0	0	0	light	45441601536	GTFIIDPAAVIR
GTFIIDPAAVIR	peptides1	230927_EXP_IBC_ulianaf_EXT_05_03_20230928232900	636.869	2	985.535	1	b10	47.04	0	0	0	light	48493277184	GTFIIDPAAVIR
GTFIIDPAAVIR	peptides1	230927_EXP_IBC_ulianaf_EXT_05_05_20230929014031	636.869	2	985.535	1	b10	46.97	0	0	0	light	214264692736	GTFIIDPAAVIR
GTFIIDPAAVIR	peptides1	230927_EXP_IBC_ulianaf_EXT_05_06_20230929031052	636.869	2	985.535	1	b10	47.04	0	0	0	light	233341435904	GTFIIDPAAVIR
GTFIIDPAAVIR	peptides1	230927_EXP_IBC_ulianaf_EXT_05_07_20230929044111	636.869	2	985.535	1	b10	47.04	0	0	0	light	243173457920	GTFIIDPAAVIR
GTFIIDPAAVIR	peptides1	230927_EXP_IBC_ulianaf_EXT_05_01_20230928202804	636.869	2	1098.62	1	b11	46.91	0	0	0	light	45739737088	GTFIIDPAAVIR
GTFIIDPAAVIR	peptides1	230927_EXP_IBC_ulianaf_EXT_05_02_20230928215838	636.869	2	1098.62	1	b11	46.96	0	0	0	light	45441601536	GTFIIDPAAVIR
GTFIIDPAAVIR	peptides1	230927_EXP_IBC_ulianaf_EXT_05_03_20230928232900	636.869	2	1098.62	1	b11	47.04	0	0	0	light	48493277184	GTFIIDPAAVIR
GTFIIDPAAVIR	peptides1	230927_EXP_IBC_ulianaf_EXT_05_05_20230929014031	636.869	2	1098.62	1	b11	46.97	0	0	0	light	214264692736	GTFIIDPAAVIR
GTFIIDPAAVIR	peptides1	230927_EXP_IBC_ulianaf_EXT_05_06_20230929031052	636.869	2	1098.62	1	b11	47.04	0	0	0	light	233341435904	GTFIIDPAAVIR
GTFIIDPAAVIR	peptides1	230927_EXP_IBC_ulianaf_EXT_05_07_20230929044111	636.869	2	1098.62	1	b11	47.04	0	0	0	light	243173457920	GTFIIDPAAVIR
IVGGKVCPKGECPWQVLLLVNG	peptides1	230927_EXP_IBC_ulianaf_EXT_05_01_20230928202804	827.124	3	1041.61	1	y9	43.69	105036	2323	5	light	45739737088	I[AAR]VGGKVC[CAM]PK[2Me]GEC[CAM]PWQVLLLVNG
IVGGKVCPKGECPWQVLLLVNG	peptides1	230927_EXP_IBC_ulianaf_EXT_05_02_20230928215838	827.124	3	1041.61	1	y9	44.09	100129	27869	5	light	45441601536	I[AAR]VGGKVC[CAM]PK[2Me]GEC[CAM]PWQVLLLVNG
IVGGKVCPKGECPWQVLLLVNG	peptides1	230927_EXP_IBC_ulianaf_EXT_05_03_20230928232900	827.124	3	1041.61	1	y9	43.92	110408	16637	4	light	48493277184	I[AAR]VGGKVC[CAM]PK[2Me]GEC[CAM]PWQVLLLVNG
IVGGKVCPKGECPWQVLLLVNG	peptides1	230927_EXP_IBC_ulianaf_EXT_05_05_20230929014031	827.124	3	1041.61	1	y9	43.18	188369	0	6	light	214264692736	I[AAR]VGGKVC[CAM]PK[2Me]GEC[CAM]PWQVLLLVNG
IVGGKVCPKGECPWQVLLLVNG	peptides1	230927_EXP_IBC_ulianaf_EXT_05_06_20230929031052	827.124	3	1041.61	1	y9	43.25	98030	0	6	light	233341435904	I[AAR]VGGKVC[CAM]PK[2Me]GEC[CAM]PWQVLLLVNG
IVGGKVCPKGECPWQVLLLVNG	peptides1	230927_EXP_IBC_ulianaf_EXT_05_07_20230929044111	827.124	3	1041.61	1	y9	43.38	405208	0	4	light	243173457920	I[AAR]VGGKVC[CAM]PK[2Me]GEC[CAM]PWQVLLLVNG
IVGGKVCPKGECPWQVLLLVNG	peptides1	230927_EXP_IBC_ulianaf_EXT_05_01_20230928202804	827.124	3	714.371	2	y12	43.42	0	0	0	light	45739737088	I[AAR]VGGKVC[CAM]PK[2Me]GEC[CAM]PWQVLLLVNG
IVGGKVCPKGECPWQVLLLVNG	peptides1	230927_EXP_IBC_ulianaf_EXT_05_02_20230928215838	827.124	3	714.371	2	y12	43.69	0	0	0	light	45441601536	I[AAR]VGGKVC[CAM]PK[2Me]GEC[CAM]PWQVLLLVNG
IVGGKVCPKGECPWQVLLLVNG	peptides1	230927_EXP_IBC_ulianaf_EXT_05_03_20230928232900	827.124	3	714.371	2	y12	43.52	0	0	0	light	48493277184	I[AAR]VGGKVC[CAM]PK[2Me]GEC[CAM]PWQVLLLVNG
IVGGKVCPKGECPWQVLLLVNG	peptides1	230927_EXP_IBC_ulianaf_EXT_05_05_20230929014031	827.124	3	714.371	2	y12	43.12	53749	0	7	light	214264692736	I[AAR]VGGKVC[CAM]PK[2Me]GEC[CAM]PWQVLLLVNG
IVGGKVCPKGECPWQVLLLVNG	peptides1	230927_EXP_IBC_ulianaf_EXT_05_06_20230929031052	827.124	3	714.371	2	y12	43.12	39810	0	8	light	233341435904	I[AAR]VGGKVC[CAM]PK[2Me]GEC[CAM]PWQVLLLVNG
IVGGKVCPKGECPWQVLLLVNG	peptides1	230927_EXP_IBC_ulianaf_EXT_05_07_20230929044111	827.124	3	714.371	2	y12	43.45	104253	0	8	light	243173457920	I[AAR]VGGKVC[CAM]PK[2Me]GEC[CAM]PWQVLLLVNG
IVGGKVCPKGECPWQVLLLVNG	peptides1	230927_EXP_IBC_ulianaf_EXT_05_01_20230928202804	827.124	3	380.225	3	y10	43.69	311853	30700	1	light	45739737088	I[AAR]VGGKVC[CAM]PK[2Me]GEC[CAM]PWQVLLLVNG
IVGGKVCPKGECPWQVLLLVNG	peptides1	230927_EXP_IBC_ulianaf_EXT_05_02_20230928215838	827.124	3	380.225	3	y10	43.89	271666	0	1	light	45441601536	I[AAR]VGGKVC[CAM]PK[2Me]GEC[CAM]PWQVLLLVNG
IVGGKVCPKGECPWQVLLLVNG	peptides1	230927_EXP_IBC_ulianaf_EXT_05_03_20230928232900	827.124	3	380.225	3	y10	43.85	325723	56216	1	light	48493277184	I[AAR]VGGKVC[CAM]PK[2Me]GEC[CAM]PWQVLLLVNG
IVGGKVCPKGECPWQVLLLVNG	peptides1	230927_EXP_IBC_ulianaf_EXT_05_05_20230929014031	827.124	3	380.225	3	y10	43.25	693315	0	1	light	214264692736	I[AAR]VGGKVC[CAM]PK[2Me]GEC[CAM]PWQVLLLVNG
IVGGKVCPKGECPWQVLLLVNG	peptides1	230927_EXP_IBC_ulianaf_EXT_05_06_20230929031052	827.124	3	380.225	3	y10	43.32	419184	0	1	light	233341435904	I[AAR]VGGKVC[CAM]PK[2Me]GEC[CAM]PWQVLLLVNG
IVGGKVCPKGECPWQVLLLVNG	peptides1	230927_EXP_IBC_ulianaf_EXT_05_07_20230929044111	827.124	3	380.225	3	y10	43.32	656190	0	2	light	243173457920	I[AAR]VGGKVC[CAM]PK[2Me]GEC[CAM]PWQVLLLVNG
IVGGKVCPKGECPWQVLLLVNG	peptides1	230927_EXP_IBC_ulianaf_EXT_05_01_20230928202804	827.124	3	355.234	1	b4	43.42	123807	30677	3	light	45739737088	I[AAR]VGGKVC[CAM]PK[2Me]GEC[CAM]PWQVLLLVNG
IVGGKVCPKGECPWQVLLLVNG	peptides1	230927_EXP_IBC_ulianaf_EXT_05_02_20230928215838	827.124	3	355.234	1	b4	44.02	55101	0	6	light	45441601536	I[AAR]VGGKVC[CAM]PK[2Me]GEC[CAM]PWQVLLLVNG
IVGGKVCPKGECPWQVLLLVNG	peptides1	230927_EXP_IBC_ulianaf_EXT_05_03_20230928232900	827.124	3	355.234	1	b4	43.78	102002	0	5	light	48493277184	I[AAR]VGGKVC[CAM]PK[2Me]GEC[CAM]PWQVLLLVNG
IVGGKVCPKGECPWQVLLLVNG	peptides1	230927_EXP_IBC_ulianaf_EXT_05_05_20230929014031	827.124	3	355.234	1	b4	43.18	256668	0	5	light	214264692736	I[AAR]VGGKVC[CAM]PK[2Me]GEC[CAM]PWQVLLLVNG
IVGGKVCPKGECPWQVLLLVNG	peptides1	230927_EXP_IBC_ulianaf_EXT_05_06_20230929031052	827.124	3	355.234	1	b4	43.32	256524	0	3	light	233341435904	I[AAR]VGGKVC[CAM]PK[2Me]GEC[CAM]PWQVLLLVNG
IVGGKVCPKGECPWQVLLLVNG	peptides1	230927_EXP_IBC_ulianaf_EXT_05_07_20230929044111	827.124	3	355.234	1	b4	43.32	454854	0	3	light	243173457920	I[AAR]VGGKVC[CAM]PK[2Me]GEC[CAM]PWQVLLLVNG
IVGGKVCPKGECPWQVLLLVNG	peptides1	230927_EXP_IBC_ulianaf_EXT_05_01_20230928202804	827.124	3	742.428	1	b7	43.82	24315	0	7	light	45739737088	I[AAR]VGGKVC[CAM]PK[2Me]GEC[CAM]PWQVLLLVNG
IVGGKVCPKGECPWQVLLLVNG	peptides1	230927_EXP_IBC_ulianaf_EXT_05_02_20230928215838	827.124	3	742.428	1	b7	43.69	0	0	0	light	45441601536	I[AAR]VGGKVC[CAM]PK[2Me]GEC[CAM]PWQVLLLVNG
IVGGKVCPKGECPWQVLLLVNG	peptides1	230927_EXP_IBC_ulianaf_EXT_05_03_20230928232900	827.124	3	742.428	1	b7	43.92	50449	0	7	light	48493277184	I[AAR]VGGKVC[CAM]PK[2Me]GEC[CAM]PWQVLLLVNG
IVGGKVCPKGECPWQVLLLVNG	peptides1	230927_EXP_IBC_ulianaf_EXT_05_05_20230929014031	827.124	3	742.428	1	b7	43.18	22236	0	8	light	214264692736	I[AAR]VGGKVC[CAM]PK[2Me]GEC[CAM]PWQVLLLVNG
IVGGKVCPKGECPWQVLLLVNG	peptides1	230927_EXP_IBC_ulianaf_EXT_05_06_20230929031052	827.124	3	742.428	1	b7	43.25	41980	0	7	light	233341435904	I[AAR]VGGKVC[CAM]PK[2Me]GEC[CAM]PWQVLLLVNG
IVGGKVCPKGECPWQVLLLVNG	peptides1	230927_EXP_IBC_ulianaf_EXT_05_07_20230929044111	827.124	3	742.428	1	b7	43.32	151475	0	7	light	243173457920	I[AAR]VGGKVC[CAM]PK[2Me]GEC[CAM]PWQVLLLVNG
IVGGKVCPKGECPWQVLLLVNG	peptides1	230927_EXP_IBC_ulianaf_EXT_05_01_20230928202804	827.124	3	839.481	1	b8	43.69	75897	24815	6	light	45739737088	I[AAR]VGGKVC[CAM]PK[2Me]GEC[CAM]PWQVLLLVNG
IVGGKVCPKGECPWQVLLLVNG	peptides1	230927_EXP_IBC_ulianaf_EXT_05_02_20230928215838	827.124	3	839.481	1	b8	43.96	118880	0	4	light	45441601536	I[AAR]VGGKVC[CAM]PK[2Me]GEC[CAM]PWQVLLLVNG
IVGGKVCPKGECPWQVLLLVNG	peptides1	230927_EXP_IBC_ulianaf_EXT_05_03_20230928232900	827.124	3	839.481	1	b8	43.78	78575	15533	6	light	48493277184	I[AAR]VGGKVC[CAM]PK[2Me]GEC[CAM]PWQVLLLVNG
IVGGKVCPKGECPWQVLLLVNG	peptides1	230927_EXP_IBC_ulianaf_EXT_05_05_20230929014031	827.124	3	839.481	1	b8	43.25	330595	0	3	light	214264692736	I[AAR]VGGKVC[CAM]PK[2Me]GEC[CAM]PWQVLLLVNG
IVGGKVCPKGECPWQVLLLVNG	peptides1	230927_EXP_IBC_ulianaf_EXT_05_06_20230929031052	827.124	3	839.481	1	b8	43.32	236432	0	4	light	233341435904	I[AAR]VGGKVC[CAM]PK[2Me]GEC[CAM]PWQVLLLVNG
IVGGKVCPKGECPWQVLLLVNG	peptides1	230927_EXP_IBC_ulianaf_EXT_05_07_20230929044111	827.124	3	839.481	1	b8	43.32	293197	0	6	light	243173457920	I[AAR]VGGKVC[CAM]PK[2Me]GEC[CAM]PWQVLLLVNG
IVGGKVCPKGECPWQVLLLVNG	peptides1	230927_EXP_IBC_ulianaf_EXT_05_01_20230928202804	827.124	3	1052.63	1	b10	43.62	128262	16951	2	light	45739737088	I[AAR]VGGKVC[CAM]PK[2Me]GEC[CAM]PWQVLLLVNG
IVGGKVCPKGECPWQVLLLVNG	peptides1	230927_EXP_IBC_ulianaf_EXT_05_02_20230928215838	827.124	3	1052.63	1	b10	43.96	151582	6484	3	light	45441601536	I[AAR]VGGKVC[CAM]PK[2Me]GEC[CAM]PWQVLLLVNG
IVGGKVCPKGECPWQVLLLVNG	peptides1	230927_EXP_IBC_ulianaf_EXT_05_03_20230928232900	827.124	3	1052.63	1	b10	43.85	144533	9845	3	light	48493277184	I[AAR]VGGKVC[CAM]PK[2Me]GEC[CAM]PWQVLLLVNG
IVGGKVCPKGECPWQVLLLVNG	peptides1	230927_EXP_IBC_ulianaf_EXT_05_05_20230929014031	827.124	3	1052.63	1	b10	43.18	265084	0	4	light	214264692736	I[AAR]VGGKVC[CAM]PK[2Me]GEC[CAM]PWQVLLLVNG
IVGGKVCPKGECPWQVLLLVNG	peptides1	230927_EXP_IBC_ulianaf_EXT_05_06_20230929031052	827.124	3	1052.63	1	b10	43.25	160867	0	5	light	233341435904	I[AAR]VGGKVC[CAM]PK[2Me]GEC[CAM]PWQVLLLVNG
IVGGKVCPKGECPWQVLLLVNG	peptides1	230927_EXP_IBC_ulianaf_EXT_05_07_20230929044111	827.124	3	1052.63	1	b10	43.32	396657	0	5	light	243173457920	I[AAR]VGGKVC[CAM]PK[2Me]GEC[CAM]PWQVLLLVNG
IVGGKVCPKGECPWQVLLLVNG	peptides1	230927_EXP_IBC_ulianaf_EXT_05_01_20230928202804	827.124	3	764.099	3	b20	43.76	107253	0	4	light	45739737088	I[AAR]VGGKVC[CAM]PK[2Me]GEC[CAM]PWQVLLLVNG
IVGGKVCPKGECPWQVLLLVNG	peptides1	230927_EXP_IBC_ulianaf_EXT_05_02_20230928215838	827.124	3	764.099	3	b20	44.09	156304	0	2	light	45441601536	I[AAR]VGGKVC[CAM]PK[2Me]GEC[CAM]PWQVLLLVNG
IVGGKVCPKGECPWQVLLLVNG	peptides1	230927_EXP_IBC_ulianaf_EXT_05_03_20230928232900	827.124	3	764.099	3	b20	43.92	204654	22221	2	light	48493277184	I[AAR]VGGKVC[CAM]PK[2Me]GEC[CAM]PWQVLLLVNG
IVGGKVCPKGECPWQVLLLVNG	peptides1	230927_EXP_IBC_ulianaf_EXT_05_05_20230929014031	827.124	3	764.099	3	b20	43.18	355368	0	2	light	214264692736	I[AAR]VGGKVC[CAM]PK[2Me]GEC[CAM]PWQVLLLVNG
IVGGKVCPKGECPWQVLLLVNG	peptides1	230927_EXP_IBC_ulianaf_EXT_05_06_20230929031052	827.124	3	764.099	3	b20	43.32	353170	0	2	light	233341435904	I[AAR]VGGKVC[CAM]PK[2Me]GEC[CAM]PWQVLLLVNG
IVGGKVCPKGECPWQVLLLVNG	peptides1	230927_EXP_IBC_ulianaf_EXT_05_07_20230929044111	827.124	3	764.099	3	b20	43.38	776854	0	1	light	243173457920	I[AAR]VGGKVC[CAM]PK[2Me]GEC[CAM]PWQVLLLVNG

## Sheet: FVII_PRM_Peptide_intensity
Peptide	CTRL_r1	CTRL_r2	CTRL_r3	MPro_r1	MPro_r2	MPro_r3
ADVTPADFSEWSK	652191600	603226972	644943592	652672496	623803236	525359108
DGLDAASYYAPVR	322145000	282584184	290001416	272126268	261435260	196252444
GAGSSEPVTGLDAK	106536368	106286671	113980426	116808232	117321109	110039751
GTFIIDPAAVIR	1476218400	1252367014	1256987642	1138169999	1158506124	983168972
GTFIIDPGGVIR	388198071	357824342	378982124	347121884	404850138	302046495
[DimethNterl]IVGGKVCPK[DimethLys]GECPWQVLLLVNG	776211	798561	887320	1901030	1426177	2689763
LGGNEQVTR	203281635	195033700	186698078	200452364	203846447	200388842
TPVISGGPYEYR	313764045	316387875	358561224	392377039	388811668	337281141
TPVITGAPYEYR	301669318	272613844	314323144	364583120	382465544	279656718
VEATFGVDESNAK	370320448	424070452	354453520	437745816	419461944	353795692
YILAGVENSK	150965028	152667774	165730329	175422751	173501373	163547194

## Sheet: FVII_cleavage_sites
P1prime_aa	cleavage_site	P1_peptide_sequence	count_CTRL_1	count_CTRL_2	count_CTRL_3	count_Mpro_1	count_Mpro_2	count_Mpro_3
S	392R-S393	[R]393_SEPRPGVLLRAPFP_406	NA	NA	NA	3	3	3
G	366Q-G367	[Q]367_GCATVGHFGVYTR_379	NA	NA	NA	2	NA	2
I	152R-I153	[R]153_IVGGKVCPKGECPWQVLLLVNG_174	NA	NA	NA	1	NA	NA
L	399V-L400	[V]400_LLRAPFP_406	NA	NA	NA	3	3	3

## Sheet: FXII_SpectroMine_output
E.Revision	E.Name	Replicate.Label-Free Quant	R.Date	R.FileName	R.NumberOfSearches	R.Spectra	PG.UniprotIds	PG.Coverage	PG.PSMs	PG.Qvalue	PG.Score	PG.Label-Free Quant	PG.PSMsForQuant	PEP.IsProteinGroupSpecific	PEP.IsProteotypic	PEP.MolecularWeight	PEP.StrippedSequence	PEP.Qvalue	PP.Charge	PP.PIMID	PP.RunEvidenceCount	PP.RTEmpirical	PP.Label-Free Quant
3.2.220222.52329	20230928_apagotto_AP14bis_FXII_all1ul_inj_F12fastasearchpluscontaminants	1	20230928_210230	230928_EC1_apagotto_AP14bis_XII_Mpro_1.raw	3	38073	NaN	0.42	35	0	0.956548	5792780	8	True	True	1467.73	RHPDYSVVLLLR	0	3	_RHPDYSVVLLLR_	9	48.4696	1902052
3.2.220222.52329	20230928_apagotto_AP14bis_FXII_all1ul_inj_F12fastasearchpluscontaminants	1	20230928_210230	230928_EC1_apagotto_AP14bis_XII_Mpro_1.raw	3	38073	NaN	0.42	35	0	0.956548	5792780	8	True	True	1467.73	RHPDYSVVLLLR	0	2	_RHPDYSVVLLLR_	7	48.5198	515249
3.2.220222.52329	20230928_apagotto_AP14bis_FXII_all1ul_inj_F12fastasearchpluscontaminants	1	20230928_210230	230928_EC1_apagotto_AP14bis_XII_Mpro_1.raw	3	38073	NaN	0.42	35	0	0.956548	5792780	8	True	True	1149.3	LVNEVTEFAK	0	2	_LVNEVTEFAK_	9	41.524	2127524
3.2.220222.52329	20230928_apagotto_AP14bis_FXII_all1ul_inj_F12fastasearchpluscontaminants	1	20230928_210230	230928_EC1_apagotto_AP14bis_XII_Mpro_1.raw	3	38073	NaN	0.42	35	0	0.956548	5792780	8	True	True	1899.22	RHPYFYAPELLFFAK	0	3	_RHPYFYAPELLFFAK_	9	61.8256	446020
3.2.220222.52329	20230928_apagotto_AP14bis_FXII_all1ul_inj_F12fastasearchpluscontaminants	1	20230928_210230	230928_EC1_apagotto_AP14bis_XII_Mpro_1.raw	3	38073	NaN	0.42	35	0	0.956548	5792780	8	True	True	879.961	AEFAEVSK	0	2	_AEFAEVSK_	9	26.6589	532536
3.2.220222.52329	20230928_apagotto_AP14bis_FXII_all1ul_inj_F12fastasearchpluscontaminants	1	20230928_210230	230928_EC1_apagotto_AP14bis_XII_Mpro_1.raw	3	38073	NaN	0.42	35	0	0.956548	5792780	8	True	True	1257.39	AAFTECCQAADK	0	2	_AAFTEC[Carbamidomethyl (C)]C[Carbamidomethyl (C)]QAADK_	9	25.2912	269399
3.2.220222.52329	20230928_apagotto_AP14bis_FXII_all1ul_inj_F12fastasearchpluscontaminants	1	20230928_210230	230928_EC1_apagotto_AP14bis_XII_Mpro_1.raw	3	38073	NaN	0.42	35	0	0.956548	5792780	8	False	False	788.935	LVTDLTK	0	2	_LVTDLTK_	9	31.2251	243038
3.2.220222.52329	20230928_apagotto_AP14bis_FXII_all1ul_inj_F12fastasearchpluscontaminants	1	20230928_210230	230928_EC1_apagotto_AP14bis_XII_Mpro_1.raw	3	38073	NaN	0.42	35	0	0.956548	5792780	8	False	False	1055.24	KYLYEIAR	0	2	_KYLYEIAR_	9	33.8193	155505
3.2.220222.52329	20230928_apagotto_AP14bis_FXII_all1ul_inj_F12fastasearchpluscontaminants	1	20230928_210230	230928_EC1_apagotto_AP14bis_XII_Mpro_1.raw	3	38073	NaN	0.42	35	0	0.956548	5792780	8	True	True	1384.45	TCVADESAENCDK	0	2	_TC[Carbamidomethyl (C)]VADESAENC[Carbamidomethyl (C)]DK_	9	20.0748	134582
3.2.220222.52329	20230928_apagotto_AP14bis_FXII_all1ul_inj_F12fastasearchpluscontaminants	1	20230928_210230	230928_EC1_apagotto_AP14bis_XII_Mpro_1.raw	3	38073	NaN	0.42	35	0	0.956548	5792780	8	True	True	1074.15	LDELRDEGK	0	3	_LDELRDEGK_	7	20.9324	82828.6
3.2.220222.52329	20230928_apagotto_AP14bis_FXII_all1ul_inj_F12fastasearchpluscontaminants	1	20230928_210230	230928_EC1_apagotto_AP14bis_XII_Mpro_1.raw	3	38073	NaN	0.42	35	0	0.956548	5792780	8	True	True	1074.15	LDELRDEGK	0	2	_LDELRDEGK_	6	21.0098	3918313
3.2.220222.52329	20230928_apagotto_AP14bis_FXII_all1ul_inj_F12fastasearchpluscontaminants	1	20230928_210230	230928_EC1_apagotto_AP14bis_XII_Mpro_1.raw	3	38073	NaN	0.42	35	0	0.956548	5792780	8	True	True	939.976	DDNPNLPR	0	2	_DDNPNLPR_	8	25.6627	634278
3.2.220222.52329	20230928_apagotto_AP14bis_FXII_all1ul_inj_F12fastasearchpluscontaminants	1	20230928_210230	230928_EC1_apagotto_AP14bis_XII_Mpro_1.raw	3	38073	NaN	0.42	35	0	0.956548	5792780	8	True	True	1017.14	SLHTLFGDK	0	2	_SLHTLFGDK_	8	36.7568	477382
3.2.220222.52329	20230928_apagotto_AP14bis_FXII_all1ul_inj_F12fastasearchpluscontaminants	1	20230928_210230	230928_EC1_apagotto_AP14bis_XII_Mpro_1.raw	3	38073	NaN	0.42	35	0	0.956548	5792780	8	True	True	950.996	DLGEENFK	0	2	_DLGEENFK_	8	31.5974	353270
3.2.220222.52329	20230928_apagotto_AP14bis_FXII_all1ul_inj_F12fastasearchpluscontaminants	1	20230928_210230	230928_EC1_apagotto_AP14bis_XII_Mpro_1.raw	3	38073	NaN	0.42	35	0	0.956548	5792780	8	True	True	2045.36	VFDEFKPLVEEPQNLIK	0	3	_VFDEFKPLVEEPQNLIK_	8	59.7054	324614
3.2.220222.52329	20230928_apagotto_AP14bis_FXII_all1ul_inj_F12fastasearchpluscontaminants	1	20230928_210230	230928_EC1_apagotto_AP14bis_XII_Mpro_1.raw	3	38073	NaN	0.42	35	0	0.956548	5792780	8	True	True	2045.36	VFDEFKPLVEEPQNLIK	0	2	_VFDEFKPLVEEPQNLIK_	2	59.7054	296214
3.2.220222.52329	20230928_apagotto_AP14bis_FXII_all1ul_inj_F12fastasearchpluscontaminants	1	20230928_210230	230928_EC1_apagotto_AP14bis_XII_Mpro_1.raw	3	38073	NaN	0.42	35	0	0.956548	5792780	8	False	False	1639.91	KVPQVSTPTLVEVSR	0	3	_KVPQVSTPTLVEVSR_	8	42.0217	264536
3.2.220222.52329	20230928_apagotto_AP14bis_FXII_all1ul_inj_F12fastasearchpluscontaminants	1	20230928_210230	230928_EC1_apagotto_AP14bis_XII_Mpro_1.raw	3	38073	NaN	0.42	35	0	0.956548	5792780	8	True	True	799.02	SVVLLLR	0	2	_SVVLLLR_	8	49.8624	239116
3.2.220222.52329	20230928_apagotto_AP14bis_FXII_all1ul_inj_F12fastasearchpluscontaminants	1	20230928_210230	230928_EC1_apagotto_AP14bis_XII_Mpro_1.raw	3	38073	NaN	0.42	35	0	0.956548	5792780	8	True	True	1128.37	KQTALVELVK	0	2	_KQTALVELVK_	7	37.5433	865746
3.2.220222.52329	20230928_apagotto_AP14bis_FXII_all1ul_inj_F12fastasearchpluscontaminants	1	20230928_210230	230928_EC1_apagotto_AP14bis_XII_Mpro_1.raw	3	38073	NaN	0.42	35	0	0.956548	5792780	8	True	True	875.034	LSQRFPK	0	2	_LSQRFPK_	7	21.3739	700485
3.2.220222.52329	20230928_apagotto_AP14bis_FXII_all1ul_inj_F12fastasearchpluscontaminants	1	20230928_210230	230928_EC1_apagotto_AP14bis_XII_Mpro_1.raw	3	38073	NaN	0.42	35	0	0.956548	5792780	8	True	True	1559.73	PADLPSLAADFVESK	0	2	_PADLPSLAADFVESK_	6	62.5176	526806
3.2.220222.52329	20230928_apagotto_AP14bis_FXII_all1ul_inj_F12fastasearchpluscontaminants	1	20230928_210230	230928_EC1_apagotto_AP14bis_XII_Mpro_1.raw	3	38073	NaN	0.42	35	0	0.956548	5792780	8	True	True	984.066	TYETTLEK	0	2	_TYETTLEK_	7	25.7602	231811
3.2.220222.52329	20230928_apagotto_AP14bis_FXII_all1ul_inj_F12fastasearchpluscontaminants	1	20230928_210230	230928_EC1_apagotto_AP14bis_XII_Mpro_1.raw	3	38073	NaN	0.42	35	0	0.956548	5792780	8	True	True	714.917	AACLLPK	0	2	_AAC[Carbamidomethyl (C)]LLPK_	7	32.5602	162451
3.2.220222.52329	20230928_apagotto_AP14bis_FXII_all1ul_inj_F12fastasearchpluscontaminants	1	20230928_210230	230928_EC1_apagotto_AP14bis_XII_Mpro_1.raw	3	38073	NaN	0.42	35	0	0.956548	5792780	8	True	True	1386.49	YICENQDSISSK	0	2	_YIC[Carbamidomethyl (C)]ENQDSISSK_	7	26.0023	132725
3.2.220222.52329	20230928_apagotto_AP14bis_FXII_all1ul_inj_F12fastasearchpluscontaminants	1	20230928_210230	230928_EC1_apagotto_AP14bis_XII_Mpro_1.raw	3	38073	NaN	0.42	35	0	0.956548	5792780	8	True	True	876.077	LCTVATLR	0	2	_LC[Carbamidomethyl (C)]TVATLR_	7	33.6906	99497.8
3.2.220222.52329	20230928_apagotto_AP14bis_FXII_all1ul_inj_F12fastasearchpluscontaminants	1	20230928_210230	230928_EC1_apagotto_AP14bis_XII_Mpro_1.raw	3	38073	NaN	0.42	35	0	0.956548	5792780	8	True	True	1379.64	LKCASLQKFGER	0	3	_LK[DimethLys0]C[Carbamidomethyl (C)]ASLQK[DimethLys0]FGER_	4	27.4575	900771
3.2.220222.52329	20230928_apagotto_AP14bis_FXII_all1ul_inj_F12fastasearchpluscontaminants	1	20230928_210230	230928_EC1_apagotto_AP14bis_XII_Mpro_1.raw	3	38073	NaN	0.42	35	0	0.956548	5792780	8	True	True	2579.78	QEPERNECFLQHKDDNPNLPR	0	4	_QEPERNEC[Carbamidomethyl (C)]FLQHKDDNPNLPR_	6	30.4149	221339
3.2.220222.52329	20230928_apagotto_AP14bis_FXII_all1ul_inj_F12fastasearchpluscontaminants	1	20230928_210230	230928_EC1_apagotto_AP14bis_XII_Mpro_1.raw	3	38073	NaN	0.42	35	0	0.956548	5792780	8	True	True	1002.13	TPVSDRVTK	0	2	_TPVSDRVTK_	5	18.1343	68770.5
3.2.220222.52329	20230928_apagotto_AP14bis_FXII_all1ul_inj_F12fastasearchpluscontaminants	1	20230928_210230	230928_EC1_apagotto_AP14bis_XII_Mpro_1.raw	3	38073	NaN	0.42	35	0	0.956548	5792780	8	True	True	1272.51	AVARLSQRFPK	0	3	_AVARLSQRFPK_	2	25.6627	94498.6
3.2.220222.52329	20230928_apagotto_AP14bis_FXII_all1ul_inj_F12fastasearchpluscontaminants	1	20230928_210230	230928_EC1_apagotto_AP14bis_XII_Mpro_1.raw	3	38073	P00748	0.759	408	0	0.996446	247531600	19	True	True	992.141	GLSYRGLAR	0	2	_GLSYRGLAR_	9	29.4786	155953300
3.2.220222.52329	20230928_apagotto_AP14bis_FXII_all1ul_inj_F12fastasearchpluscontaminants	1	20230928_210230	230928_EC1_apagotto_AP14bis_XII_Mpro_1.raw	3	38073	P00748	0.759	408	0	0.996446	247531600	19	True	True	2266.54	FFHKNEIWYRTEQAAVAR	0	4	_[DimethNter0]FFHK[DimethLys0]NEIWYRTEQAAVAR_	9	37.6415	5684284
3.2.220222.52329	20230928_apagotto_AP14bis_FXII_all1ul_inj_F12fastasearchpluscontaminants	1	20230928_210230	230928_EC1_apagotto_AP14bis_XII_Mpro_1.raw	3	38073	P00748	0.759	408	0	0.996446	247531600	19	True	True	2266.54	FFHKNEIWYRTEQAAVAR	0	3	_[DimethNter0]FFHK[DimethLys0]NEIWYRTEQAAVAR_	9	37.6415	2167579
3.2.220222.52329	20230928_apagotto_AP14bis_FXII_all1ul_inj_F12fastasearchpluscontaminants	1	20230928_210230	230928_EC1_apagotto_AP14bis_XII_Mpro_1.raw	3	38073	P00748	0.759	408	0	0.996446	247531600	19	True	True	2266.54	FFHKNEIWYRTEQAAVAR	0	3	_FFHK[DimethLys0]NEIWYRTEQAAVAR_	9	37.9089	44920900
3.2.220222.52329	20230928_apagotto_AP14bis_FXII_all1ul_inj_F12fastasearchpluscontaminants	1	20230928_210230	230928_EC1_apagotto_AP14bis_XII_Mpro_1.raw	3	38073	P00748	0.759	408	0	0.996446	247531600	19	True	True	2266.54	FFHKNEIWYRTEQAAVAR	0	4	_FFHK[DimethLys0]NEIWYRTEQAAVAR_	9	38.4715	624784
3.2.220222.52329	20230928_apagotto_AP14bis_FXII_all1ul_inj_F12fastasearchpluscontaminants	1	20230928_210230	230928_EC1_apagotto_AP14bis_XII_Mpro_1.raw	3	38073	P00748	0.759	408	0	0.996446	247531600	19	True	True	2266.54	FFHKNEIWYRTEQAAVAR	0	2	_FFHK[DimethLys0]NEIWYRTEQAAVAR_	8	37.5932	23017920
3.2.220222.52329	20230928_apagotto_AP14bis_FXII_all1ul_inj_F12fastasearchpluscontaminants	1	20230928_210230	230928_EC1_apagotto_AP14bis_XII_Mpro_1.raw	3	38073	P00748	0.759	408	0	0.996446	247531600	19	True	True	2266.54	FFHKNEIWYRTEQAAVAR	0	3	_FFHKNEIWYRTEQAAVAR_	5	37.3932	747792
3.2.220222.52329	20230928_apagotto_AP14bis_FXII_all1ul_inj_F12fastasearchpluscontaminants	1	20230928_210230	230928_EC1_apagotto_AP14bis_XII_Mpro_1.raw	3	38073	P00748	0.759	408	0	0.996446	247531600	19	True	True	2266.54	FFHKNEIWYRTEQAAVAR	0	4	_FFHKNEIWYRTEQAAVAR_	5	37.3932	2089075
3.2.220222.52329	20230928_apagotto_AP14bis_FXII_all1ul_inj_F12fastasearchpluscontaminants	1	20230928_210230	230928_EC1_apagotto_AP14bis_XII_Mpro_1.raw	3	38073	P00748	0.759	408	0	0.996446	247531600	19	True	True	2075.38	CQCKGPDAHCQRLASQACR	0	5	_C[Carbamidomethyl (C)]QC[Carbamidomethyl (C)]K[DimethLys0]GPDAHC[Carbamidomethyl (C)]QRLASQAC[Carbamidomethyl (C)]R_	9	18.6418	11300110
3.2.220222.52329	20230928_apagotto_AP14bis_FXII_all1ul_inj_F12fastasearchpluscontaminants	1	20230928_210230	230928_EC1_apagotto_AP14bis_XII_Mpro_1.raw	3	38073	P00748	0.759	408	0	0.996446	247531600	19	True	True	2075.38	CQCKGPDAHCQRLASQACR	0	5	_[DimethNter0]C[Carbamidomethyl (C)]QC[Carbamidomethyl (C)]K[DimethLys0]GPDAHC[Carbamidomethyl (C)]QRLASQAC[Carbamidomethyl (C)]R_	7	19.0718	125888
3.2.220222.52329	20230928_apagotto_AP14bis_FXII_all1ul_inj_F12fastasearchpluscontaminants	1	20230928_210230	230928_EC1_apagotto_AP14bis_XII_Mpro_1.raw	3	38073	P00748	0.759	408	0	0.996446	247531600	19	True	True	2075.38	CQCKGPDAHCQRLASQACR	0	4	_[DimethNter0]C[Carbamidomethyl (C)]QC[Carbamidomethyl (C)]K[DimethLys0]GPDAHC[Carbamidomethyl (C)]QRLASQAC[Carbamidomethyl (C)]R_	4	19.0718	227501
3.2.220222.52329	20230928_apagotto_AP14bis_FXII_all1ul_inj_F12fastasearchpluscontaminants	1	20230928_210230	230928_EC1_apagotto_AP14bis_XII_Mpro_1.raw	3	38073	P00748	0.759	408	0	0.996446	247531600	19	True	True	927.02	EQPPSLTR	0	2	_EQPPSLTR_	9	25.7102	16099990
3.2.220222.52329	20230928_apagotto_AP14bis_FXII_all1ul_inj_F12fastasearchpluscontaminants	1	20230928_210230	230928_EC1_apagotto_AP14bis_XII_Mpro_1.raw	3	38073	P00748	0.759	408	0	0.996446	247531600	19	True	True	927.02	EQPPSLTR	0	2	_[DimethNter0]EQPPSLTR_	9	26.997	83782.8
3.2.220222.52329	20230928_apagotto_AP14bis_FXII_all1ul_inj_F12fastasearchpluscontaminants	1	20230928_210230	230928_EC1_apagotto_AP14bis_XII_Mpro_1.raw	3	38073	P00748	0.759	408	0	0.996446	247531600	19	True	True	1683.92	LASQACRTNPCLHGGR	0	4	_LASQAC[Carbamidomethyl (C)]RTNPC[Carbamidomethyl (C)]LHGGR_	9	20.113	7975711
3.2.220222.52329	20230928_apagotto_AP14bis_FXII_all1ul_inj_F12fastasearchpluscontaminants	1	20230928_210230	230928_EC1_apagotto_AP14bis_XII_Mpro_1.raw	3	38073	P00748	0.759	408	0	0.996446	247531600	19	True	True	1683.92	LASQACRTNPCLHGGR	0	3	_LASQAC[Carbamidomethyl (C)]RTNPC[Carbamidomethyl (C)]LHGGR_	9	20.0748	116705
3.2.220222.52329	20230928_apagotto_AP14bis_FXII_all1ul_inj_F12fastasearchpluscontaminants	1	20230928_210230	230928_EC1_apagotto_AP14bis_XII_Mpro_1.raw	3	38073	P00748	0.759	408	0	0.996446	247531600	19	True	True	1683.92	LASQACRTNPCLHGGR	0	4	_[DimethNter0]LASQAC[Carbamidomethyl (C)]RTNPC[Carbamidomethyl (C)]LHGGR_	7	20.3086	2875831
3.2.220222.52329	20230928_apagotto_AP14bis_FXII_all1ul_inj_F12fastasearchpluscontaminants	1	20230928_210230	230928_EC1_apagotto_AP14bis_XII_Mpro_1.raw	3	38073	P00748	0.759	408	0	0.996446	247531600	19	True	True	1683.92	LASQACRTNPCLHGGR	0	2	_LASQAC[Carbamidomethyl (C)]RTNPC[Carbamidomethyl (C)]LHGGR_	4	20.1425	15015160
3.2.220222.52329	20230928_apagotto_AP14bis_FXII_all1ul_inj_F12fastasearchpluscontaminants	1	20230928_210230	230928_EC1_apagotto_AP14bis_XII_Mpro_1.raw	3	38073	P00748	0.759	408	0	0.996446	247531600	19	True	True	1683.92	LASQACRTNPCLHGGR	0	3	_[DimethNter0]LASQAC[Carbamidomethyl (C)]RTNPC[Carbamidomethyl (C)]LHGGR_	4	20.3583	459872
3.2.220222.52329	20230928_apagotto_AP14bis_FXII_all1ul_inj_F12fastasearchpluscontaminants	1	20230928_210230	230928_EC1_apagotto_AP14bis_XII_Mpro_1.raw	3	38073	P00748	0.759	408	0	0.996446	247531600	19	True	True	1439.63	FFHKNEIWYR	0	2	_FFHK[DimethLys0]NEIWYR_	9	36.6066	14049430
3.2.220222.52329	20230928_apagotto_AP14bis_FXII_all1ul_inj_F12fastasearchpluscontaminants	1	20230928_210230	230928_EC1_apagotto_AP14bis_XII_Mpro_1.raw	3	38073	P00748	0.759	408	0	0.996446	247531600	19	True	True	1439.63	FFHKNEIWYR	0	3	_FFHK[DimethLys0]NEIWYR_	9	37.0946	66536750
3.2.220222.52329	20230928_apagotto_AP14bis_FXII_all1ul_inj_F12fastasearchpluscontaminants	1	20230928_210230	230928_EC1_apagotto_AP14bis_XII_Mpro_1.raw	3	38073	P00748	0.759	408	0	0.996446	247531600	19	True	True	1439.63	FFHKNEIWYR	0	3	_[DimethNter0]FFHK[DimethLys0]NEIWYR_	8	36.3702	1215469
3.2.220222.52329	20230928_apagotto_AP14bis_FXII_all1ul_inj_F12fastasearchpluscontaminants	1	20230928_210230	230928_EC1_apagotto_AP14bis_XII_Mpro_1.raw	3	38073	P00748	0.759	408	0	0.996446	247531600	19	True	True	1439.63	FFHKNEIWYR	0	3	_FFHKNEIWYR_	6	36.0331	122010
3.2.220222.52329	20230928_apagotto_AP14bis_FXII_all1ul_inj_F12fastasearchpluscontaminants	1	20230928_210230	230928_EC1_apagotto_AP14bis_XII_Mpro_1.raw	3	38073	P00748	0.759	408	0	0.996446	247531600	19	True	True	2502.81	SYRLHEAFSPVSYQHDLALLR	0	4	_SYRLHEAFSPVSYQHDLALLR_	9	49.4048	14265290
3.2.220222.52329	20230928_apagotto_AP14bis_FXII_all1ul_inj_F12fastasearchpluscontaminants	1	20230928_210230	230928_EC1_apagotto_AP14bis_XII_Mpro_1.raw	3	38073	P00748	0.759	408	0	0.996446	247531600	19	True	True	2502.81	SYRLHEAFSPVSYQHDLALLR	0	3	_SYRLHEAFSPVSYQHDLALLR_	9	49.107	5476319
3.2.220222.52329	20230928_apagotto_AP14bis_FXII_all1ul_inj_F12fastasearchpluscontaminants	1	20230928_210230	230928_EC1_apagotto_AP14bis_XII_Mpro_1.raw	3	38073	P00748	0.759	408	0	0.996446	247531600	19	True	True	2502.81	SYRLHEAFSPVSYQHDLALLR	0	4	_[DimethNter0]SYRLHEAFSPVSYQHDLALLR_	9	50.1582	324931
3.2.220222.52329	20230928_apagotto_AP14bis_FXII_all1ul_inj_F12fastasearchpluscontaminants	1	20230928_210230	230928_EC1_apagotto_AP14bis_XII_Mpro_1.raw	3	38073	P00748	0.759	408	0	0.996446	247531600	19	True	True	2502.81	SYRLHEAFSPVSYQHDLALLR	0	2	_SYRLHEAFSPVSYQHDLALLR_	7	49.2563	483462
3.2.220222.52329	20230928_apagotto_AP14bis_FXII_all1ul_inj_F12fastasearchpluscontaminants	1	20230928_210230	230928_EC1_apagotto_AP14bis_XII_Mpro_1.raw	3	38073	P00748	0.759	408	0	0.996446	247531600	19	True	True	3058.44	NWGLGGHAFCRNPDNDIRPWCFVLNR	0	4	_NWGLGGHAFC[Carbamidomethyl (C)]RNPDNDIRPWC[Carbamidomethyl (C)]FVLNR_	9	56.351	15488160
3.2.220222.52329	20230928_apagotto_AP14bis_FXII_all1ul_inj_F12fastasearchpluscontaminants	1	20230928_210230	230928_EC1_apagotto_AP14bis_XII_Mpro_1.raw	3	38073	P00748	0.759	408	0	0.996446	247531600	19	True	True	3058.44	NWGLGGHAFCRNPDNDIRPWCFVLNR	0	5	_NWGLGGHAFC[Carbamidomethyl (C)]RNPDNDIRPWC[Carbamidomethyl (C)]FVLNR_	9	56.3018	368171
3.2.220222.52329	20230928_apagotto_AP14bis_FXII_all1ul_inj_F12fastasearchpluscontaminants	1	20230928_210230	230928_EC1_apagotto_AP14bis_XII_Mpro_1.raw	3	38073	P00748	0.759	408	0	0.996446	247531600	19	True	True	3058.44	NWGLGGHAFCRNPDNDIRPWCFVLNR	0	3	_NWGLGGHAFC[Carbamidomethyl (C)]RNPDNDIRPWC[Carbamidomethyl (C)]FVLNR_	8	56.351	2628420
3.2.220222.52329	20230928_apagotto_AP14bis_FXII_all1ul_inj_F12fastasearchpluscontaminants	1	20230928_210230	230928_EC1_apagotto_AP14bis_XII_Mpro_1.raw	3	38073	P00748	0.759	408	0	0.996446	247531600	19	True	True	1345.53	CQCKGPDAHCQR	0	3	_C[Carbamidomethyl (C)]QC[Carbamidomethyl (C)]K[DimethLys0]GPDAHC[Carbamidomethyl (C)]QR_	9	13.5559	5540895
3.2.220222.52329	20230928_apagotto_AP14bis_FXII_all1ul_inj_F12fastasearchpluscontaminants	1	20230928_210230	230928_EC1_apagotto_AP14bis_XII_Mpro_1.raw	3	38073	P00748	0.759	408	0	0.996446	247531600	19	True	True	1345.53	CQCKGPDAHCQR	0	4	_C[Carbamidomethyl (C)]QC[Carbamidomethyl (C)]K[DimethLys0]GPDAHC[Carbamidomethyl (C)]QR_	9	13.5559	4366769
3.2.220222.52329	20230928_apagotto_AP14bis_FXII_all1ul_inj_F12fastasearchpluscontaminants	1	20230928_210230	230928_EC1_apagotto_AP14bis_XII_Mpro_1.raw	3	38073	P00748	0.759	408	0	0.996446	247531600	19	True	True	883.097	VVGGLVALR	0	2	_VVGGLVALR_	9	44.052	4687209
3.2.220222.52329	20230928_apagotto_AP14bis_FXII_all1ul_inj_F12fastasearchpluscontaminants	1	20230928_210230	230928_EC1_apagotto_AP14bis_XII_Mpro_1.raw	3	38073	P00748	0.759	408	0	0.996446	247531600	19	True	True	883.097	VVGGLVALR	0	2	_[DimethNter0]VVGGLVALR_	3	45.1954	518121
3.2.220222.52329	20230928_apagotto_AP14bis_FXII_all1ul_inj_F12fastasearchpluscontaminants	1	20230928_210230	230928_EC1_apagotto_AP14bis_XII_Mpro_1.raw	3	38073	P00748	0.759	408	0	0.996446	247531600	19	True	True	1878.11	TNPCLHGGRCLEVEGHR	0	4	_TNPC[Carbamidomethyl (C)]LHGGRC[Carbamidomethyl (C)]LEVEGHR_	9	21.6889	1126677
3.2.220222.52329	20230928_apagotto_AP14bis_FXII_all1ul_inj_F12fastasearchpluscontaminants	1	20230928_210230	230928_EC1_apagotto_AP14bis_XII_Mpro_1.raw	3	38073	P00748	0.759	408	0	0.996446	247531600	19	True	True	1878.11	TNPCLHGGRCLEVEGHR	0	3	_TNPC[Carbamidomethyl (C)]LHGGRC[Carbamidomethyl (C)]LEVEGHR_	8	21.5225	9168210
3.2.220222.52329	20230928_apagotto_AP14bis_FXII_all1ul_inj_F12fastasearchpluscontaminants	1	20230928_210230	230928_EC1_apagotto_AP14bis_XII_Mpro_1.raw	3	38073	P00748	0.759	408	0	0.996446	247531600	19	True	True	2130.36	NPDNDIRPWCFVLNRDR	0	4	_NPDNDIRPWC[Carbamidomethyl (C)]FVLNRDR_	9	51.2967	1267608
3.2.220222.52329	20230928_apagotto_AP14bis_FXII_all1ul_inj_F12fastasearchpluscontaminants	1	20230928_210230	230928_EC1_apagotto_AP14bis_XII_Mpro_1.raw	3	38073	P00748	0.759	408	0	0.996446	247531600	19	True	True	2130.36	NPDNDIRPWCFVLNRDR	0	3	_NPDNDIRPWC[Carbamidomethyl (C)]FVLNRDR_	8	51.2967	4533046
3.2.220222.52329	20230928_apagotto_AP14bis_FXII_all1ul_inj_F12fastasearchpluscontaminants	1	20230928_210230	230928_EC1_apagotto_AP14bis_XII_Mpro_1.raw	3	38073	P00748	0.759	408	0	0.996446	247531600	19	True	True	1759.07	HCQKEKCFEPQLLR	0	4	_HC[Carbamidomethyl (C)]QK[DimethLys0]EK[DimethLys0]C[Carbamidomethyl (C)]FEPQLLR_	9	30.6999	10426130
3.2.220222.52329	20230928_apagotto_AP14bis_FXII_all1ul_inj_F12fastasearchpluscontaminants	1	20230928_210230	230928_EC1_apagotto_AP14bis_XII_Mpro_1.raw	3	38073	P00748	0.759	408	0	0.996446	247531600	19	True	True	1759.07	HCQKEKCFEPQLLR	0	3	_HC[Carbamidomethyl (C)]QK[DimethLys0]EK[DimethLys0]C[Carbamidomethyl (C)]FEPQLLR_	8	30.6999	5544438
3.2.220222.52329	20230928_apagotto_AP14bis_FXII_all1ul_inj_F12fastasearchpluscontaminants	1	20230928_210230	230928_EC1_apagotto_AP14bis_XII_Mpro_1.raw	3	38073	P00748	0.759	408	0	0.996446	247531600	19	True	True	1759.07	HCQKEKCFEPQLLR	0	4	_[DimethNter0]HC[Carbamidomethyl (C)]QK[DimethLys0]EK[DimethLys0]C[Carbamidomethyl (C)]FEPQLLR_	7	30.893	4888973
3.2.220222.52329	20230928_apagotto_AP14bis_FXII_all1ul_inj_F12fastasearchpluscontaminants	1	20230928_210230	230928_EC1_apagotto_AP14bis_XII_Mpro_1.raw	3	38073	P00748	0.759	408	0	0.996446	247531600	19	True	True	1759.07	HCQKEKCFEPQLLR	0	3	_[DimethNter0]HC[Carbamidomethyl (C)]QK[DimethLys0]EK[DimethLys0]C[Carbamidomethyl (C)]FEPQLLR_	5	30.893	2264619
3.2.220222.52329	20230928_apagotto_AP14bis_FXII_all1ul_inj_F12fastasearchpluscontaminants	1	20230928_210230	230928_EC1_apagotto_AP14bis_XII_Mpro_1.raw	3	38073	P00748	0.759	408	0	0.996446	247531600	19	True	True	1217.37	NWGLGGHAFCR	0	2	_NWGLGGHAFC[Carbamidomethyl (C)]R_	9	38.849	7557577
3.2.220222.52329	20230928_apagotto_AP14bis_FXII_all1ul_inj_F12fastasearchpluscontaminants	1	20230928_210230	230928_EC1_apagotto_AP14bis_XII_Mpro_1.raw	3	38073	P00748	0.759	408	0	0.996446	247531600	19	True	True	1217.37	NWGLGGHAFCR	0	3	_NWGLGGHAFC[Carbamidomethyl (C)]R_	9	38.849	2075032
3.2.220222.52329	20230928_apagotto_AP14bis_FXII_all1ul_inj_F12fastasearchpluscontaminants	1	20230928_210230	230928_EC1_apagotto_AP14bis_XII_Mpro_1.raw	3	38073	P00748	0.759	408	0	0.996446	247531600	19	True	True	2096.37	LHEAFSPVSYQHDLALLR	0	4	_LHEAFSPVSYQHDLALLR_	9	51.2967	2887530
3.2.220222.52329	20230928_apagotto_AP14bis_FXII_all1ul_inj_F12fastasearchpluscontaminants	1	20230928_210230	230928_EC1_apagotto_AP14bis_XII_Mpro_1.raw	3	38073	P00748	0.759	408	0	0.996446	247531600	19	True	True	2096.37	LHEAFSPVSYQHDLALLR	0	2	_LHEAFSPVSYQHDLALLR_	9	51.2967	4436331
3.2.220222.52329	20230928_apagotto_AP14bis_FXII_all1ul_inj_F12fastasearchpluscontaminants	1	20230928_210230	230928_EC1_apagotto_AP14bis_XII_Mpro_1.raw	3	38073	P00748	0.759	408	0	0.996446	247531600	19	True	True	2096.37	LHEAFSPVSYQHDLALLR	0	3	_LHEAFSPVSYQHDLALLR_	9	51.4958	27630180
3.2.220222.52329	20230928_apagotto_AP14bis_FXII_all1ul_inj_F12fastasearchpluscontaminants	1	20230928_210230	230928_EC1_apagotto_AP14bis_XII_Mpro_1.raw	3	38073	P00748	0.759	408	0	0.996446	247531600	19	True	True	2096.37	LHEAFSPVSYQHDLALLR	0	4	_[DimethNter0]LHEAFSPVSYQHDLALLR_	9	51.6435	247613
3.2.220222.52329	20230928_apagotto_AP14bis_FXII_all1ul_inj_F12fastasearchpluscontaminants	1	20230928_210230	230928_EC1_apagotto_AP14bis_XII_Mpro_1.raw	3	38073	P00748	0.759	408	0	0.996446	247531600	19	True	True	2096.37	LHEAFSPVSYQHDLALLR	0	3	_[DimethNter0]LHEAFSPVSYQHDLALLR_	7	51.6435	607117
3.2.220222.52329	20230928_apagotto_AP14bis_FXII_all1ul_inj_F12fastasearchpluscontaminants	1	20230928_210230	230928_EC1_apagotto_AP14bis_XII_Mpro_1.raw	3	38073	P00748	0.759	408	0	0.996446	247531600	19	True	True	1819.06	RLTLQGIISWGSGCGDR	0	3	_RLTLQGIISWGSGC[Carbamidomethyl (C)]GDR_	9	57.7289	2572640
3.2.220222.52329	20230928_apagotto_AP14bis_FXII_all1ul_inj_F12fastasearchpluscontaminants	1	20230928_210230	230928_EC1_apagotto_AP14bis_XII_Mpro_1.raw	3	38073	P00748	0.759	408	0	0.996446	247531600	19	True	True	1819.06	RLTLQGIISWGSGCGDR	0	2	_RLTLQGIISWGSGC[Carbamidomethyl (C)]GDR_	6	57.7792	1394392
3.2.220222.52329	20230928_apagotto_AP14bis_FXII_all1ul_inj_F12fastasearchpluscontaminants	1	20230928_210230	230928_EC1_apagotto_AP14bis_XII_Mpro_1.raw	3	38073	P00748	0.759	408	0	0.996446	247531600	19	True	True	942.053	CLEVEGHR	0	2	_C[Carbamidomethyl (C)]LEVEGHR_	9	20.4034	11816640
3.2.220222.52329	20230928_apagotto_AP14bis_FXII_all1ul_inj_F12fastasearchpluscontaminants	1	20230928_210230	230928_EC1_apagotto_AP14bis_XII_Mpro_1.raw	3	38073	P00748	0.759	408	0	0.996446	247531600	19	True	True	1972.19	HKNEIWYRTEQAAVAR	0	3	_HK[DimethLys0]NEIWYRTEQAAVAR_	9	30.6999	1726728
3.2.220222.52329	20230928_apagotto_AP14bis_FXII_all1ul_inj_F12fastasearchpluscontaminants	1	20230928_210230	230928_EC1_apagotto_AP14bis_XII_Mpro_1.raw	3	38073	P00748	0.759	408	0	0.996446	247531600	19	True	True	1972.19	HKNEIWYRTEQAAVAR	0	4	_HK[DimethLys0]NEIWYRTEQAAVAR_	6	30.6999	1500891
3.2.220222.52329	20230928_apagotto_AP14bis_FXII_all1ul_inj_F12fastasearchpluscontaminants	1	20230928_210230	230928_EC1_apagotto_AP14bis_XII_Mpro_1.raw	3	38073	P00748	0.759	408	0	0.996446	247531600	19	True	True	1972.19	HKNEIWYRTEQAAVAR	0	4	_[DimethNter0]HK[DimethLys0]NEIWYRTEQAAVAR_	2	30.7458	397267
3.2.220222.52329	20230928_apagotto_AP14bis_FXII_all1ul_inj_F12fastasearchpluscontaminants	1	20230928_210230	230928_EC1_apagotto_AP14bis_XII_Mpro_1.raw	3	38073	P00748	0.759	408	0	0.996446	247531600	19	True	True	958.039	NWGLGGHAF	0	2	_NWGLGGHAF_	9	48.7183	1516397
3.2.220222.52329	20230928_apagotto_AP14bis_FXII_all1ul_inj_F12fastasearchpluscontaminants	1	20230928_210230	230928_EC1_apagotto_AP14bis_XII_Mpro_1.raw	3	38073	P00748	0.759	408	0	0.996446	247531600	19	True	True	1859.09	NPDNDIRPWCFVLNR	0	3	_NPDNDIRPWC[Carbamidomethyl (C)]FVLNR_	9	56.449	2803113
3.2.220222.52329	20230928_apagotto_AP14bis_FXII_all1ul_inj_F12fastasearchpluscontaminants	1	20230928_210230	230928_EC1_apagotto_AP14bis_XII_Mpro_1.raw	3	38073	P00748	0.759	408	0	0.996446	247531600	19	True	True	1859.09	NPDNDIRPWCFVLNR	0	2	_NPDNDIRPWC[Carbamidomethyl (C)]FVLNR_	7	56.498	314802
3.2.220222.52329	20230928_apagotto_AP14bis_FXII_all1ul_inj_F12fastasearchpluscontaminants	1	20230928_210230	230928_EC1_apagotto_AP14bis_XII_Mpro_1.raw	3	38073	P00748	0.759	408	0	0.996446	247531600	19	True	True	2325.54	NWGLGGHAFCRNPDNDIRPW	0	3	_NWGLGGHAFC[Carbamidomethyl (C)]RNPDNDIRPW_	8	48.5695	2554043
3.2.220222.52329	20230928_apagotto_AP14bis_FXII_all1ul_inj_F12fastasearchpluscontaminants	1	20230928_210230	230928_EC1_apagotto_AP14bis_XII_Mpro_1.raw	3	38073	P00748	0.759	408	0	0.996446	247531600	19	True	True	1288.46	EAQVPFLSLER	0	2	_[DimethNter0]EAQVPFLSLER_	8	57.5305	1274359
3.2.220222.52329	20230928_apagotto_AP14bis_FXII_all1ul_inj_F12fastasearchpluscontaminants	1	20230928_210230	230928_EC1_apagotto_AP14bis_XII_Mpro_1.raw	3	38073	P00748	0.759	408	0	0.996446	247531600	19	True	True	1288.46	EAQVPFLSLER	0	2	_EAQVPFLSLER_	8	56.9434	52520.6
3.2.220222.52329	20230928_apagotto_AP14bis_FXII_all1ul_inj_F12fastasearchpluscontaminants	1	20230928_210230	230928_EC1_apagotto_AP14bis_XII_Mpro_1.raw	3	38073	P00748	0.759	408	0	0.996446	247531600	19	True	True	1840.04	EQPPSLTRNGPLSCGQR	0	3	_EQPPSLTRNGPLSC[Carbamidomethyl (C)]GQR_	9	32.6077	1209956
3.2.220222.52329	20230928_apagotto_AP14bis_FXII_all1ul_inj_F12fastasearchpluscontaminants	1	20230928_210230	230928_EC1_apagotto_AP14bis_XII_Mpro_1.raw	3	38073	P00748	0.759	408	0	0.996446	247531600	19	True	True	1431.54	SGGPLVCEDQAAER	0	2	_[DimethNter0]SGGPLVC[Carbamidomethyl (C)]EDQAAER_	9	30.6498	2050978
3.2.220222.52329	20230928_apagotto_AP14bis_FXII_all1ul_inj_F12fastasearchpluscontaminants	1	20230928_210230	230928_EC1_apagotto_AP14bis_XII_Mpro_1.raw	3	38073	P00748	0.759	408	0	0.996446	247531600	19	True	True	1431.54	SGGPLVCEDQAAER	0	2	_SGGPLVC[Carbamidomethyl (C)]EDQAAER_	8	30.0464	96670.5
3.2.220222.52329	20230928_apagotto_AP14bis_FXII_all1ul_inj_F12fastasearchpluscontaminants	1	20230928_210230	230928_EC1_apagotto_AP14bis_XII_Mpro_1.raw	3	38073	P00748	0.759	408	0	0.996446	247531600	19	True	True	1689.95	DIRPWCFVLNRDR	0	3	_DIRPWC[Carbamidomethyl (C)]FVLNRDR_	8	52.5783	1921447
3.2.220222.52329	20230928_apagotto_AP14bis_FXII_all1ul_inj_F12fastasearchpluscontaminants	1	20230928_210230	230928_EC1_apagotto_AP14bis_XII_Mpro_1.raw	3	38073	P00748	0.759	408	0	0.996446	247531600	19	True	True	1689.95	DIRPWCFVLNRDR	0	3	_[DimethNter0]DIRPWC[Carbamidomethyl (C)]FVLNRDR_	5	54.2043	400624
3.2.220222.52329	20230928_apagotto_AP14bis_FXII_all1ul_inj_F12fastasearchpluscontaminants	1	20230928_210230	230928_EC1_apagotto_AP14bis_XII_Mpro_1.raw	3	38073	P00748	0.759	408	0	0.996446	247531600	19	True	True	1320.47	DGRGLSYRGLAR	0	3	_DGRGLSYRGLAR_	9	27.4073	953631
3.2.220222.52329	20230928_apagotto_AP14bis_FXII_all1ul_inj_F12fastasearchpluscontaminants	1	20230928_210230	230928_EC1_apagotto_AP14bis_XII_Mpro_1.raw	3	38073	P00748	0.759	408	0	0.996446	247531600	19	True	True	1991.27	TNPCLHGGRCLEVEGHRL	0	3	_TNPC[Carbamidomethyl (C)]LHGGRC[Carbamidomethyl (C)]LEVEGHRL_	8	30.7458	930441
3.2.220222.52329	20230928_apagotto_AP14bis_FXII_all1ul_inj_F12fastasearchpluscontaminants	1	20230928_210230	230928_EC1_apagotto_AP14bis_XII_Mpro_1.raw	3	38073	P00748	0.759	408	0	0.996446	247531600	19	True	True	1991.27	TNPCLHGGRCLEVEGHRL	0	4	_TNPC[Carbamidomethyl (C)]LHGGRC[Carbamidomethyl (C)]LEVEGHRL_	8	30.7929	261009
3.2.220222.52329	20230928_apagotto_AP14bis_FXII_all1ul_inj_F12fastasearchpluscontaminants	1	20230928_210230	230928_EC1_apagotto_AP14bis_XII_Mpro_1.raw	3	38073	P00748	0.759	408	0	0.996446	247531600	19	True	True	1205.38	GRGLSYRGLAR	0	3	_[DimethNter0]GRGLSYRGLAR_	6	25.1431	873804
3.2.220222.52329	20230928_apagotto_AP14bis_FXII_all1ul_inj_F12fastasearchpluscontaminants	1	20230928_210230	230928_EC1_apagotto_AP14bis_XII_Mpro_1.raw	3	38073	P00748	0.759	408	0	0.996446	247531600	19	True	True	3318.6	SYRLHEAFSPVSYQHDLALLRLQEDADGS	0	4	_SYRLHEAFSPVSYQHDLALLRLQEDADGS_	8	53.7616	770606
3.2.220222.52329	20230928_apagotto_AP14bis_FXII_all1ul_inj_F12fastasearchpluscontaminants	1	20230928_210230	230928_EC1_apagotto_AP14bis_XII_Mpro_1.raw	3	38073	P00748	0.759	408	0	0.996446	247531600	19	True	True	3318.6	SYRLHEAFSPVSYQHDLALLRLQEDADGS	0	3	_SYRLHEAFSPVSYQHDLALLRLQEDADGS_	8	53.7616	200064
3.2.220222.52329	20230928_apagotto_AP14bis_FXII_all1ul_inj_F12fastasearchpluscontaminants	1	20230928_210230	230928_EC1_apagotto_AP14bis_XII_Mpro_1.raw	3	38073	P00748	0.759	408	0	0.996446	247531600	19	True	True	1292.32	ATTPNFDQDQR	0	2	_ATTPNFDQDQR_	9	26.8988	80186.8
3.2.220222.52329	20230928_apagotto_AP14bis_FXII_all1ul_inj_F12fastasearchpluscontaminants	1	20230928_210230	230928_EC1_apagotto_AP14bis_XII_Mpro_1.raw	3	38073	P00748	0.759	408	0	0.996446	247531600	19	True	True	1292.32	ATTPNFDQDQR	0	2	_[DimethNter0]ATTPNFDQDQR_	2	27.7153	714824
3.2.220222.52329	20230928_apagotto_AP14bis_FXII_all1ul_inj_F12fastasearchpluscontaminants	1	20230928_210230	230928_EC1_apagotto_AP14bis_XII_Mpro_1.raw	3	38073	P00748	0.759	408	0	0.996446	247531600	19	True	True	2989.35	YKAEEHTVVLTVTGEPCHFPFQYHR	0	4	_[DimethNter0]YK[DimethLys0]AEEHTVVLTVTGEPC[Carbamidomethyl (C)]HFPFQYHR_	9	45.7911	3812278
3.2.220222.52329	20230928_apagotto_AP14bis_FXII_all1ul_inj_F12fastasearchpluscontaminants	1	20230928_210230	230928_EC1_apagotto_AP14bis_XII_Mpro_1.raw	3	38073	P00748	0.759	408	0	0.996446	247531600	19	True	True	2989.35	YKAEEHTVVLTVTGEPCHFPFQYHR	0	5	_[DimethNter0]YK[DimethLys0]AEEHTVVLTVTGEPC[Carbamidomethyl (C)]HFPFQYHR_	9	45.6909	623643
3.2.220222.52329	20230928_apagotto_AP14bis_FXII_all1ul_inj_F12fastasearchpluscontaminants	1	20230928_210230	230928_EC1_apagotto_AP14bis_XII_Mpro_1.raw	3	38073	P00748	0.759	408	0	0.996446	247531600	19	True	True	1583.83	CSAPDVHGSSILPGML	0	2	_C[Carbamidomethyl (C)]SAPDVHGSSILPGML_	9	57.5797	568528
3.2.220222.52329	20230928_apagotto_AP14bis_FXII_all1ul_inj_F12fastasearchpluscontaminants	1	20230928_210230	230928_EC1_apagotto_AP14bis_XII_Mpro_1.raw	3	38073	P00748	0.759	408	0	0.996446	247531600	19	True	True	1331.47	NWGLGGHAFCRN	0	3	_NWGLGGHAFC[Carbamidomethyl (C)]RN_	9	37.1948	640691
3.2.220222.52329	20230928_apagotto_AP14bis_FXII_all1ul_inj_F12fastasearchpluscontaminants	1	20230928_210230	230928_EC1_apagotto_AP14bis_XII_Mpro_1.raw	3	38073	P00748	0.759	408	0	0.996446	247531600	19	True	True	1331.47	NWGLGGHAFCRN	0	2	_NWGLGGHAFC[Carbamidomethyl (C)]RN_	8	37.1948	749693
3.2.220222.52329	20230928_apagotto_AP14bis_FXII_all1ul_inj_F12fastasearchpluscontaminants	1	20230928_210230	230928_EC1_apagotto_AP14bis_XII_Mpro_1.raw	3	38073	P00748	0.759	408	0	0.996446	247531600	19	True	True	1206.39	SCEPCQTLAVR	0	2	_SC[Carbamidomethyl (C)]EPC[Carbamidomethyl (C)]QTLAVR_	9	31.5075	992557
3.2.220222.52329	20230928_apagotto_AP14bis_FXII_all1ul_inj_F12fastasearchpluscontaminants	1	20230928_210230	230928_EC1_apagotto_AP14bis_XII_Mpro_1.raw	3	38073	P00748	0.759	408	0	0.996446	247531600	19	True	True	1717.92	VTGEPCHFPFQYHR	0	4	_[DimethNter0]VTGEPC[Carbamidomethyl (C)]HFPFQYHR_	4	37.8245	478616
3.2.220222.52329	20230928_apagotto_AP14bis_FXII_all1ul_inj_F12fastasearchpluscontaminants	1	20230928_210230	230928_EC1_apagotto_AP14bis_XII_Mpro_1.raw	3	38073	P00748	0.759	408	0	0.996446	247531600	19	True	True	1717.92	VTGEPCHFPFQYHR	0	3	_[DimethNter0]VTGEPC[Carbamidomethyl (C)]HFPFQYHR_	3	37.8245	763060
3.2.220222.52329	20230928_apagotto_AP14bis_FXII_all1ul_inj_F12fastasearchpluscontaminants	1	20230928_210230	230928_EC1_apagotto_AP14bis_XII_Mpro_1.raw	3	38073	P00748	0.759	408	0	0.996446	247531600	19	True	True	1603.68	GDSGGPLVCEDQAAER	0	2	_GDSGGPLVC[Carbamidomethyl (C)]EDQAAER_	9	30.9882	343346
3.2.220222.52329	20230928_apagotto_AP14bis_FXII_all1ul_inj_F12fastasearchpluscontaminants	1	20230928_210230	230928_EC1_apagotto_AP14bis_XII_Mpro_1.raw	3	38073	P00748	0.759	408	0	0.996446	247531600	19	True	True	1603.68	GDSGGPLVCEDQAAER	0	2	_[DimethNter0]GDSGGPLVC[Carbamidomethyl (C)]EDQAAER_	7	31.3188	212287
3.2.220222.52329	20230928_apagotto_AP14bis_FXII_all1ul_inj_F12fastasearchpluscontaminants	1	20230928_210230	230928_EC1_apagotto_AP14bis_XII_Mpro_1.raw	3	38073	P00748	0.759	408	0	0.996446	247531600	19	True	True	1102.36	LHVPLMPAQP	0	2	_LHVPLMPAQP_	9	51.8854	291458
3.2.220222.52329	20230928_apagotto_AP14bis_FXII_all1ul_inj_F12fastasearchpluscontaminants	1	20230928_210230	230928_EC1_apagotto_AP14bis_XII_Mpro_1.raw	3	38073	P00748	0.759	408	0	0.996446	247531600	19	True	True	4579.05	CSAPDVHGSSILPGMLCAGFLEGGTDACQGDSGGPLVCEDQAAERR	0	4	_C[Carbamidomethyl (C)]SAPDVHGSSILPGM[Oxidation (M)]LC[Carbamidomethyl (C)]AGFLEGGTDAC[Carbamidomethyl (C)]QGDSGGPLVC[Carbamidomethyl (C)]EDQAAERR_	9	56.3018	830729
3.2.220222.52329	20230928_apagotto_AP14bis_FXII_all1ul_inj_F12fastasearchpluscontaminants	1	20230928_210230	230928_EC1_apagotto_AP14bis_XII_Mpro_1.raw	3	38073	P00748	0.759	408	0	0.996446	247531600	19	True	True	4579.05	CSAPDVHGSSILPGMLCAGFLEGGTDACQGDSGGPLVCEDQAAERR	0	4	_C[Carbamidomethyl (C)]SAPDVHGSSILPGMLC[Carbamidomethyl (C)]AGFLEGGTDAC[Carbamidomethyl (C)]QGDSGGPLVC[Carbamidomethyl (C)]EDQAAERR_	9	61.3298	534526
3.2.220222.52329	20230928_apagotto_AP14bis_FXII_all1ul_inj_F12fastasearchpluscontaminants	1	20230928_210230	230928_EC1_apagotto_AP14bis_XII_Mpro_1.raw	3	38073	P00748	0.759	408	0	0.996446	247531600	19	True	True	1673.86	SCYDGRGLSYRGLAR	0	4	_[DimethNter0]SC[Carbamidomethyl (C)]YDGRGLSYRGLAR_	3	31.2751	236080
3.2.220222.52329	20230928_apagotto_AP14bis_FXII_all1ul_inj_F12fastasearchpluscontaminants	1	20230928_210230	230928_EC1_apagotto_AP14bis_XII_Mpro_1.raw	3	38073	P00748	0.759	408	0	0.996446	247531600	19	True	True	1343.53	HSCEPCQTLAVR	0	2	_HSC[Carbamidomethyl (C)]EPC[Carbamidomethyl (C)]QTLAVR_	8	26.5678	233554
3.2.220222.52329	20230928_apagotto_AP14bis_FXII_all1ul_inj_F12fastasearchpluscontaminants	1	20230928_210230	230928_EC1_apagotto_AP14bis_XII_Mpro_1.raw	3	38073	P00748	0.759	408	0	0.996446	247531600	19	True	True	1343.53	HSCEPCQTLAVR	0	3	_HSC[Carbamidomethyl (C)]EPC[Carbamidomethyl (C)]QTLAVR_	8	26.6022	106842
3.2.220222.52329	20230928_apagotto_AP14bis_FXII_all1ul_inj_F12fastasearchpluscontaminants	1	20230928_210230	230928_EC1_apagotto_AP14bis_XII_Mpro_1.raw	3	38073	P00748	0.759	408	0	0.996446	247531600	19	True	True	1343.53	HSCEPCQTLAVR	0	3	_[DimethNter0]HSC[Carbamidomethyl (C)]EPC[Carbamidomethyl (C)]QTLAVR_	7	26.8988	66443.9
3.2.220222.52329	20230928_apagotto_AP14bis_FXII_all1ul_inj_F12fastasearchpluscontaminants	1	20230928_210230	230928_EC1_apagotto_AP14bis_XII_Mpro_1.raw	3	38073	P00748	0.759	408	0	0.996446	247531600	19	True	True	1936.07	SYRLHEAFSPVSYQHD	0	3	_SYRLHEAFSPVSYQHD_	9	37.0062	205922
3.2.220222.52329	20230928_apagotto_AP14bis_FXII_all1ul_inj_F12fastasearchpluscontaminants	1	20230928_210230	230928_EC1_apagotto_AP14bis_XII_Mpro_1.raw	3	38073	P00748	0.759	408	0	0.996446	247531600	19	True	True	1613.83	RNHSCEPCQTLAVR	0	4	_RNHSC[Carbamidomethyl (C)]EPC[Carbamidomethyl (C)]QTLAVR_	9	21.7778	182567
3.2.220222.52329	20230928_apagotto_AP14bis_FXII_all1ul_inj_F12fastasearchpluscontaminants	1	20230928_210230	230928_EC1_apagotto_AP14bis_XII_Mpro_1.raw	3	38073	P00748	0.759	408	0	0.996446	247531600	19	True	True	1613.83	RNHSCEPCQTLAVR	0	3	_RNHSC[Carbamidomethyl (C)]EPC[Carbamidomethyl (C)]QTLAVR_	9	21.7651	148444
3.2.220222.52329	20230928_apagotto_AP14bis_FXII_all1ul_inj_F12fastasearchpluscontaminants	1	20230928_210230	230928_EC1_apagotto_AP14bis_XII_Mpro_1.raw	3	38073	P00748	0.759	408	0	0.996446	247531600	19	True	True	1131.26	HFPFQYHR	0	2	_HFPFQYHR_	1	45.3941	171037
3.2.220222.52329	20230928_apagotto_AP14bis_FXII_all1ul_inj_F12fastasearchpluscontaminants	1	20230928_210230	230928_EC1_apagotto_AP14bis_XII_Mpro_1.raw	3	38073	P00748	0.759	408	0	0.996446	247531600	19	True	True	747.863	LASQACR	0	2	_LASQAC[Carbamidomethyl (C)]R_	9	14.1203	11887340
3.2.220222.52329	20230928_apagotto_AP14bis_FXII_all1ul_inj_F12fastasearchpluscontaminants	1	20230928_210230	230928_EC1_apagotto_AP14bis_XII_Mpro_1.raw	3	38073	P00748	0.759	408	0	0.996446	247531600	19	True	True	1587.72	SGGPLVCEDQAAERR	0	3	_SGGPLVC[Carbamidomethyl (C)]EDQAAERR_	9	25.9869	433508
3.2.220222.52329	20230928_apagotto_AP14bis_FXII_all1ul_inj_F12fastasearchpluscontaminants	1	20230928_210230	230928_EC1_apagotto_AP14bis_XII_Mpro_1.raw	3	38073	P00748	0.759	408	0	0.996446	247531600	19	True	True	1933.17	RLTLQGIISWGSGCGDRN	0	3	_RLTLQGIISWGSGC[Carbamidomethyl (C)]GDRN_	9	56.5471	396744
3.2.220222.52329	20230928_apagotto_AP14bis_FXII_all1ul_inj_F12fastasearchpluscontaminants	1	20230928_210230	230928_EC1_apagotto_AP14bis_XII_Mpro_1.raw	3	38073	P00748	0.759	408	0	0.996446	247531600	19	True	True	1200.38	NGPLSCGQRLR	0	3	_NGPLSC[Carbamidomethyl (C)]GQRLR_	9	24.8506	159457
3.2.220222.52329	20230928_apagotto_AP14bis_FXII_all1ul_inj_F12fastasearchpluscontaminants	1	20230928_210230	230928_EC1_apagotto_AP14bis_XII_Mpro_1.raw	3	38073	P00748	0.759	408	0	0.996446	247531600	19	True	True	1457.64	NHSCEPCQTLAVR	0	3	_NHSC[Carbamidomethyl (C)]EPC[Carbamidomethyl (C)]QTLAVR_	9	26.5166	155458
3.2.220222.52329	20230928_apagotto_AP14bis_FXII_all1ul_inj_F12fastasearchpluscontaminants	1	20230928_210230	230928_EC1_apagotto_AP14bis_XII_Mpro_1.raw	3	38073	P00748	0.759	408	0	0.996446	247531600	19	True	True	1586.78	CYDGRGLSYRGLAR	0	4	_[DimethNter0]C[Carbamidomethyl (C)]YDGRGLSYRGLAR_	9	31.3678	567572
3.2.220222.52329	20230928_apagotto_AP14bis_FXII_all1ul_inj_F12fastasearchpluscontaminants	1	20230928_210230	230928_EC1_apagotto_AP14bis_XII_Mpro_1.raw	3	38073	P00748	0.759	408	0	0.996446	247531600	19	True	True	954.067	TNPCLHGGR	0	2	_TNPC[Carbamidomethyl (C)]LHGGR_	9	14.7132	130311
3.2.220222.52329	20230928_apagotto_AP14bis_FXII_all1ul_inj_F12fastasearchpluscontaminants	1	20230928_210230	230928_EC1_apagotto_AP14bis_XII_Mpro_1.raw	3	38073	P00748	0.759	408	0	0.996446	247531600	19	True	True	2970.2	LCAGFLEGGTDACQGDSGGPLVCEDQAAER	0	3	_LC[Carbamidomethyl (C)]AGFLEGGTDAC[Carbamidomethyl (C)]QGDSGGPLVC[Carbamidomethyl (C)]EDQAAER_	9	51.9346	251481
3.2.220222.52329	20230928_apagotto_AP14bis_FXII_all1ul_inj_F12fastasearchpluscontaminants	1	20230928_210230	230928_EC1_apagotto_AP14bis_XII_Mpro_1.raw	3	38073	P00748	0.759	408	0	0.996446	247531600	19	True	True	1517.68	GEPCHFPFQYHR	0	3	_[DimethNter0]GEPC[Carbamidomethyl (C)]HFPFQYHR_	9	36.4203	120270
3.2.220222.52329	20230928_apagotto_AP14bis_FXII_all1ul_inj_F12fastasearchpluscontaminants	1	20230928_210230	230928_EC1_apagotto_AP14bis_XII_Mpro_1.raw	3	38073	P00748	0.759	408	0	0.996446	247531600	19	True	True	1517.68	GEPCHFPFQYHR	0	3	_GEPC[Carbamidomethyl (C)]HFPFQYHR_	9	35.8696	135744
3.2.220222.52329	20230928_apagotto_AP14bis_FXII_all1ul_inj_F12fastasearchpluscontaminants	1	20230928_210230	230928_EC1_apagotto_AP14bis_XII_Mpro_1.raw	3	38073	P00748	0.759	408	0	0.996446	247531600	19	True	True	1499.68	SQACRTNPCLHGGR	0	4	_SQAC[Carbamidomethyl (C)]RTNPC[Carbamidomethyl (C)]LHGGR_	9	14.9164	257034
3.2.220222.52329	20230928_apagotto_AP14bis_FXII_all1ul_inj_F12fastasearchpluscontaminants	1	20230928_210230	230928_EC1_apagotto_AP14bis_XII_Mpro_1.raw	3	38073	P00748	0.759	408	0	0.996446	247531600	19	True	True	1499.68	SQACRTNPCLHGGR	0	3	_SQAC[Carbamidomethyl (C)]RTNPC[Carbamidomethyl (C)]LHGGR_	8	14.9026	86946.6
3.2.220222.52329	20230928_apagotto_AP14bis_FXII_all1ul_inj_F12fastasearchpluscontaminants	1	20230928_210230	230928_EC1_apagotto_AP14bis_XII_Mpro_1.raw	3	38073	P00748	0.759	408	0	0.996446	247531600	19	True	True	2279.6	AHCQRLASQACRTNPCLHGGR	0	4	_AHC[Carbamidomethyl (C)]QRLASQAC[Carbamidomethyl (C)]RTNPC[Carbamidomethyl (C)]LHGGR_	9	18.571	111504
3.2.220222.52329	20230928_apagotto_AP14bis_FXII_all1ul_inj_F12fastasearchpluscontaminants	1	20230928_210230	230928_EC1_apagotto_AP14bis_XII_Mpro_1.raw	3	38073	P00748	0.759	408	0	0.996446	247531600	19	True	True	2279.6	AHCQRLASQACRTNPCLHGGR	0	5	_AHC[Carbamidomethyl (C)]QRLASQAC[Carbamidomethyl (C)]RTNPC[Carbamidomethyl (C)]LHGGR_	9	18.571	73638.2
3.2.220222.52329	20230928_apagotto_AP14bis_FXII_all1ul_inj_F12fastasearchpluscontaminants	1	20230928_210230	230928_EC1_apagotto_AP14bis_XII_Mpro_1.raw	3	38073	P00748	0.759	408	0	0.996446	247531600	19	True	True	738.858	PCLHGGR	0	2	_PC[Carbamidomethyl (C)]LHGGR_	9	13.7557	103767
3.2.220222.52329	20230928_apagotto_AP14bis_FXII_all1ul_inj_F12fastasearchpluscontaminants	1	20230928_210230	230928_EC1_apagotto_AP14bis_XII_Mpro_1.raw	3	38073	P00748	0.759	408	0	0.996446	247531600	19	True	True	1022.19	CFVLNRDR	0	3	_C[Carbamidomethyl (C)]FVLNRDR_	9	27.7627	99933.3
3.2.220222.52329	20230928_apagotto_AP14bis_FXII_all1ul_inj_F12fastasearchpluscontaminants	1	20230928_210230	230928_EC1_apagotto_AP14bis_XII_Mpro_1.raw	3	38073	P00748	0.759	408	0	0.996446	247531600	19	True	True	1395.46	CATTPNFDQDQR	0	2	_C[Carbamidomethyl (C)]ATTPNFDQDQR_	9	27.9236	334422
3.2.220222.52329	20230928_apagotto_AP14bis_FXII_all1ul_inj_F12fastasearchpluscontaminants	1	20230928_210230	230928_EC1_apagotto_AP14bis_XII_Mpro_1.raw	3	38073	P00748	0.759	408	0	0.996446	247531600	19	True	True	844.918	TEQAAVAR	0	2	_TEQAAVAR_	9	15.505	94134.7
3.2.220222.52329	20230928_apagotto_AP14bis_FXII_all1ul_inj_F12fastasearchpluscontaminants	1	20230928_210230	230928_EC1_apagotto_AP14bis_XII_Mpro_1.raw	3	38073	P00748	0.759	408	0	0.996446	247531600	19	True	True	1343.54	AHCQRLASQACR	0	3	_AHC[Carbamidomethyl (C)]QRLASQAC[Carbamidomethyl (C)]R_	9	13.8915	217746
3.2.220222.52329	20230928_apagotto_AP14bis_FXII_all1ul_inj_F12fastasearchpluscontaminants	1	20230928_210230	230928_EC1_apagotto_AP14bis_XII_Mpro_1.raw	3	38073	P00748	0.759	408	0	0.996446	247531600	19	True	True	1344.46	GGPLVCEDQAAER	0	2	_GGPLVC[Carbamidomethyl (C)]EDQAAER_	8	29.3405	55218.6
3.2.220222.52329	20230928_apagotto_AP14bis_FXII_all1ul_inj_F12fastasearchpluscontaminants	1	20230928_210230	230928_EC1_apagotto_AP14bis_XII_Mpro_1.raw	3	38073	P00748	0.759	408	0	0.996446	247531600	19	True	True	4422.87	CSAPDVHGSSILPGMLCAGFLEGGTDACQGDSGGPLVCEDQAAER	0	4	_C[Carbamidomethyl (C)]SAPDVHGSSILPGMLC[Carbamidomethyl (C)]AGFLEGGTDAC[Carbamidomethyl (C)]QGDSGGPLVC[Carbamidomethyl (C)]EDQAAER_	9	64.5231	923668
3.2.220222.52329	20230928_apagotto_AP14bis_FXII_all1ul_inj_F12fastasearchpluscontaminants	1	20230928_210230	230928_EC1_apagotto_AP14bis_XII_Mpro_1.raw	3	38073	P00748	0.759	408	0	0.996446	247531600	19	True	True	4422.87	CSAPDVHGSSILPGMLCAGFLEGGTDACQGDSGGPLVCEDQAAER	0	4	_C[Carbamidomethyl (C)]SAPDVHGSSILPGM[Oxidation (M)]LC[Carbamidomethyl (C)]AGFLEGGTDAC[Carbamidomethyl (C)]QGDSGGPLVC[Carbamidomethyl (C)]EDQAAER_	9	58.6698	340525
3.2.220222.52329	20230928_apagotto_AP14bis_FXII_all1ul_inj_F12fastasearchpluscontaminants	1	20230928_210230	230928_EC1_apagotto_AP14bis_XII_Mpro_1.raw	3	38073	P00748	0.759	408	0	0.996446	247531600	19	True	True	2020.27	RNHSCEPCQTLAVRSYR	0	4	_RNHSC[Carbamidomethyl (C)]EPC[Carbamidomethyl (C)]QTLAVRSYR_	9	24.3296	40041.6
3.2.220222.52329	20230928_apagotto_AP14bis_FXII_all1ul_inj_F12fastasearchpluscontaminants	1	20230928_210230	230928_EC1_apagotto_AP14bis_XII_Mpro_1.raw	3	38073	P00748	0.759	408	0	0.996446	247531600	19	True	True	1939.13	TTLSGAPCQPWASEATYR	0	2	_TTLSGAPC[Carbamidomethyl (C)]QPWASEATYR_	8	44.748	7398387
3.2.220222.52329	20230928_apagotto_AP14bis_FXII_all1ul_inj_F12fastasearchpluscontaminants	1	20230928_210230	230928_EC1_apagotto_AP14bis_XII_Mpro_1.raw	3	38073	P00748	0.759	408	0	0.996446	247531600	19	True	True	1618.78	TGEPCHFPFQYHR	0	3	_TGEPC[Carbamidomethyl (C)]HFPFQYHR_	7	36.4704	1930202
3.2.220222.52329	20230928_apagotto_AP14bis_FXII_all1ul_inj_F12fastasearchpluscontaminants	1	20230928_210230	230928_EC1_apagotto_AP14bis_XII_Mpro_1.raw	3	38073	P00748	0.759	408	0	0.996446	247531600	19	True	True	1618.78	TGEPCHFPFQYHR	0	4	_TGEPC[Carbamidomethyl (C)]HFPFQYHR_	5	36.5205	468110
3.2.220222.52329	20230928_apagotto_AP14bis_FXII_all1ul_inj_F12fastasearchpluscontaminants	1	20230928_210230	230928_EC1_apagotto_AP14bis_XII_Mpro_1.raw	3	38073	P00748	0.759	408	0	0.996446	247531600	19	True	True	1618.78	TGEPCHFPFQYHR	0	4	_[DimethNter0]TGEPC[Carbamidomethyl (C)]HFPFQYHR_	4	36.8559	496094
3.2.220222.52329	20230928_apagotto_AP14bis_FXII_all1ul_inj_F12fastasearchpluscontaminants	1	20230928_210230	230928_EC1_apagotto_AP14bis_XII_Mpro_1.raw	3	38073	P00748	0.759	408	0	0.996446	247531600	19	True	True	1618.78	TGEPCHFPFQYHR	0	3	_[DimethNter0]TGEPC[Carbamidomethyl (C)]HFPFQYHR_	2	36.8559	1149914
3.2.220222.52329	20230928_apagotto_AP14bis_FXII_all1ul_inj_F12fastasearchpluscontaminants	1	20230928_210230	230928_EC1_apagotto_AP14bis_XII_Mpro_1.raw	3	38073	P00748	0.759	408	0	0.996446	247531600	19	True	True	1618.78	TGEPCHFPFQYHR	0	2	_TGEPC[Carbamidomethyl (C)]HFPFQYHR_	2	36.5205	256781
3.2.220222.52329	20230928_apagotto_AP14bis_FXII_all1ul_inj_F12fastasearchpluscontaminants	1	20230928_210230	230928_EC1_apagotto_AP14bis_XII_Mpro_1.raw	3	38073	P00748	0.759	408	0	0.996446	247531600	19	True	True	1350.5	WYRTEQAAVAR	0	3	_WYRTEQAAVAR_	6	26.0356	201220
3.2.220222.52329	20230928_apagotto_AP14bis_FXII_all1ul_inj_F12fastasearchpluscontaminants	1	20230928_210230	230928_EC1_apagotto_AP14bis_XII_Mpro_1.raw	3	38073	P00748	0.759	408	0	0.996446	247531600	19	True	True	1350.5	WYRTEQAAVAR	0	3	_[DimethNter0]WYRTEQAAVAR_	3	25.3401	1910065
3.2.220222.52329	20230928_apagotto_AP14bis_FXII_all1ul_inj_F12fastasearchpluscontaminants	1	20230928_210230	230928_EC1_apagotto_AP14bis_XII_Mpro_1.raw	3	38073	P00748	0.759	408	0	0.996446	247531600	19	True	True	1592.77	EIWYRTEQAAVAR	0	3	_EIWYRTEQAAVAR_	8	36.8058	3121320
3.2.220222.52329	20230928_apagotto_AP14bis_FXII_all1ul_inj_F12fastasearchpluscontaminants	1	20230928_210230	230928_EC1_apagotto_AP14bis_XII_Mpro_1.raw	3	38073	P00748	0.759	408	0	0.996446	247531600	19	True	True	1592.77	EIWYRTEQAAVAR	0	2	_EIWYRTEQAAVAR_	6	36.7568	992418
3.2.220222.52329	20230928_apagotto_AP14bis_FXII_all1ul_inj_F12fastasearchpluscontaminants	1	20230928_210230	230928_EC1_apagotto_AP14bis_XII_Mpro_1.raw	3	38073	P00748	0.759	408	0	0.996446	247531600	19	True	True	1592.77	EIWYRTEQAAVAR	0	3	_[DimethNter0]EIWYRTEQAAVAR_	6	37.0445	769222
3.2.220222.52329	20230928_apagotto_AP14bis_FXII_all1ul_inj_F12fastasearchpluscontaminants	1	20230928_210230	230928_EC1_apagotto_AP14bis_XII_Mpro_1.raw	3	38073	P00748	0.759	408	0	0.996446	247531600	19	True	True	1592.77	EIWYRTEQAAVAR	0	2	_[DimethNter0]EIWYRTEQAAVAR_	3	37.0445	477542
3.2.220222.52329	20230928_apagotto_AP14bis_FXII_all1ul_inj_F12fastasearchpluscontaminants	1	20230928_210230	230928_EC1_apagotto_AP14bis_XII_Mpro_1.raw	3	38073	P00748	0.759	408	0	0.996446	247531600	19	True	True	902.056	FEPQLLR	0	2	_FEPQLLR_	7	42.7685	202438
3.2.220222.52329	20230928_apagotto_AP14bis_FXII_all1ul_inj_F12fastasearchpluscontaminants	1	20230928_210230	230928_EC1_apagotto_AP14bis_XII_Mpro_1.raw	3	38073	P00748	0.759	408	0	0.996446	247531600	19	True	True	902.056	FEPQLLR	0	2	_[DimethNter0]FEPQLLR_	3	45.3443	1395724
3.2.220222.52329	20230928_apagotto_AP14bis_FXII_all1ul_inj_F12fastasearchpluscontaminants	1	20230928_210230	230928_EC1_apagotto_AP14bis_XII_Mpro_1.raw	3	38073	P00748	0.759	408	0	0.996446	247531600	19	True	True	821.93	SYRGLAR	0	2	_SYRGLAR_	8	29.5125	739582
3.2.220222.52329	20230928_apagotto_AP14bis_FXII_all1ul_inj_F12fastasearchpluscontaminants	1	20230928_210230	230928_EC1_apagotto_AP14bis_XII_Mpro_1.raw	3	38073	P00748	0.759	408	0	0.996446	247531600	19	True	True	1387.6	RLTLQGIISWGSG	0	2	_RLTLQGIISWGSG_	8	63.3512	1331054
3.2.220222.52329	20230928_apagotto_AP14bis_FXII_all1ul_inj_F12fastasearchpluscontaminants	1	20230928_210230	230928_EC1_apagotto_AP14bis_XII_Mpro_1.raw	3	38073	P00748	0.759	408	0	0.996446	247531600	19	True	True	2016.26	PDNDIRPWCFVLNRDR	0	4	_PDNDIRPWC[Carbamidomethyl (C)]FVLNRDR_	8	51.3968	315571
3.2.220222.52329	20230928_apagotto_AP14bis_FXII_all1ul_inj_F12fastasearchpluscontaminants	1	20230928_210230	230928_EC1_apagotto_AP14bis_XII_Mpro_1.raw	3	38073	P00748	0.759	408	0	0.996446	247531600	19	True	True	2016.26	PDNDIRPWCFVLNRDR	0	3	_PDNDIRPWC[Carbamidomethyl (C)]FVLNRDR_	7	51.3968	451049
3.2.220222.52329	20230928_apagotto_AP14bis_FXII_all1ul_inj_F12fastasearchpluscontaminants	1	20230928_210230	230928_EC1_apagotto_AP14bis_XII_Mpro_1.raw	3	38073	P00748	0.759	408	0	0.996446	247531600	19	True	True	1864.08	NHSCEPCQTLAVRSYR	0	3	_NHSC[Carbamidomethyl (C)]EPC[Carbamidomethyl (C)]QTLAVRSYR_	8	27.361	919639
3.2.220222.52329	20230928_apagotto_AP14bis_FXII_all1ul_inj_F12fastasearchpluscontaminants	1	20230928_210230	230928_EC1_apagotto_AP14bis_XII_Mpro_1.raw	3	38073	P00748	0.759	408	0	0.996446	247531600	19	True	True	1243.47	RLTLQGIISWG	0	2	_RLTLQGIISWG_	8	64.2415	384355
3.2.220222.52329	20230928_apagotto_AP14bis_FXII_all1ul_inj_F12fastasearchpluscontaminants	1	20230928_210230	230928_EC1_apagotto_AP14bis_XII_Mpro_1.raw	3	38073	P00748	0.759	408	0	0.996446	247531600	19	True	True	1055.21	CLEVEGHRL	0	2	_C[Carbamidomethyl (C)]LEVEGHRL_	7	33.1968	332552
3.2.220222.52329	20230928_apagotto_AP14bis_FXII_all1ul_inj_F12fastasearchpluscontaminants	1	20230928_210230	230928_EC1_apagotto_AP14bis_XII_Mpro_1.raw	3	38073	P00748	0.759	408	0	0.996446	247531600	19	True	True	1055.21	CLEVEGHRL	0	3	_C[Carbamidomethyl (C)]LEVEGHRL_	6	33.2443	176955
3.2.220222.52329	20230928_apagotto_AP14bis_FXII_all1ul_inj_F12fastasearchpluscontaminants	1	20230928_210230	230928_EC1_apagotto_AP14bis_XII_Mpro_1.raw	3	38073	P00748	0.759	408	0	0.996446	247531600	19	True	True	1227.35	LSWEYCDLAQ	0	2	_LSWEYC[Carbamidomethyl (C)]DLAQ_	8	55.808	320834
3.2.220222.52329	20230928_apagotto_AP14bis_FXII_all1ul_inj_F12fastasearchpluscontaminants	1	20230928_210230	230928_EC1_apagotto_AP14bis_XII_Mpro_1.raw	3	38073	P00748	0.759	408	0	0.996446	247531600	19	True	True	2062.21	ACQGDSGGPLVCEDQAAERR	0	3	_AC[Carbamidomethyl (C)]QGDSGGPLVC[Carbamidomethyl (C)]EDQAAERR_	8	27.5922	299012
3.2.220222.52329	20230928_apagotto_AP14bis_FXII_all1ul_inj_F12fastasearchpluscontaminants	1	20230928_210230	230928_EC1_apagotto_AP14bis_XII_Mpro_1.raw	3	38073	P00748	0.759	408	0	0.996446	247531600	19	True	True	806.029	LHVPLMP	0.00581395	2	_LHVPLMP_	8	53.216	381521
3.2.220222.52329	20230928_apagotto_AP14bis_FXII_all1ul_inj_F12fastasearchpluscontaminants	1	20230928_210230	230928_EC1_apagotto_AP14bis_XII_Mpro_1.raw	3	38073	P00748	0.759	408	0	0.996446	247531600	19	True	True	931.029	NGPLSCGQR	0	2	_NGPLSC[Carbamidomethyl (C)]GQR_	8	20.6599	252646
3.2.220222.52329	20230928_apagotto_AP14bis_FXII_all1ul_inj_F12fastasearchpluscontaminants	1	20230928_210230	230928_EC1_apagotto_AP14bis_XII_Mpro_1.raw	3	38073	P00748	0.759	408	0	0.996446	247531600	19	True	True	2536.76	HKGRPGPQPWCATTPNFDQDQR	0	4	_[DimethNter0]HK[DimethLys0]GRPGPQPWC[Carbamidomethyl (C)]ATTPNFDQDQR_	8	32.9987	233923
3.2.220222.52329	20230928_apagotto_AP14bis_FXII_all1ul_inj_F12fastasearchpluscontaminants	1	20230928_210230	230928_EC1_apagotto_AP14bis_XII_Mpro_1.raw	3	38073	P00748	0.759	408	0	0.996446	247531600	19	True	True	2826.18	KAEEHTVVLTVTGEPCHFPFQYHR	0	4	_[DimethNter0]K[DimethLys0]AEEHTVVLTVTGEPC[Carbamidomethyl (C)]HFPFQYHR_	8	44.4979	681183
3.2.220222.52329	20230928_apagotto_AP14bis_FXII_all1ul_inj_F12fastasearchpluscontaminants	1	20230928_210230	230928_EC1_apagotto_AP14bis_XII_Mpro_1.raw	3	38073	P00748	0.759	408	0	0.996446	247531600	19	True	True	2826.18	KAEEHTVVLTVTGEPCHFPFQYHR	0	5	_[DimethNter0]K[DimethLys0]AEEHTVVLTVTGEPC[Carbamidomethyl (C)]HFPFQYHR_	8	44.4979	45464.8
3.2.220222.52329	20230928_apagotto_AP14bis_FXII_all1ul_inj_F12fastasearchpluscontaminants	1	20230928_210230	230928_EC1_apagotto_AP14bis_XII_Mpro_1.raw	3	38073	P00748	0.759	408	0	0.996446	247531600	19	True	True	1540.74	FFHKNEIWYRT	0	3	_FFHK[DimethLys0]NEIWYRT_	8	37.1948	172014
3.2.220222.52329	20230928_apagotto_AP14bis_FXII_all1ul_inj_F12fastasearchpluscontaminants	1	20230928_210230	230928_EC1_apagotto_AP14bis_XII_Mpro_1.raw	3	38073	P00748	0.759	408	0	0.996446	247531600	19	True	True	2607.96	LASQACRTNPCLHGGRCLEVEGHR	0	5	_LASQAC[Carbamidomethyl (C)]RTNPC[Carbamidomethyl (C)]LHGGRC[Carbamidomethyl (C)]LEVEGHR_	8	24.9114	166182
3.2.220222.52329	20230928_apagotto_AP14bis_FXII_all1ul_inj_F12fastasearchpluscontaminants	1	20230928_210230	230928_EC1_apagotto_AP14bis_XII_Mpro_1.raw	3	38073	P00748	0.759	408	0	0.996446	247531600	19	True	True	2607.96	LASQACRTNPCLHGGRCLEVEGHR	0	6	_LASQAC[Carbamidomethyl (C)]RTNPC[Carbamidomethyl (C)]LHGGRC[Carbamidomethyl (C)]LEVEGHR_	7	24.9241	151787
3.2.220222.52329	20230928_apagotto_AP14bis_FXII_all1ul_inj_F12fastasearchpluscontaminants	1	20230928_210230	230928_EC1_apagotto_AP14bis_XII_Mpro_1.raw	3	38073	P00748	0.759	408	0	0.996446	247531600	19	True	True	2607.96	LASQACRTNPCLHGGRCLEVEGHR	0	4	_LASQAC[Carbamidomethyl (C)]RTNPC[Carbamidomethyl (C)]LHGGRC[Carbamidomethyl (C)]LEVEGHR_	7	24.9	102448
3.2.220222.52329	20230928_apagotto_AP14bis_FXII_all1ul_inj_F12fastasearchpluscontaminants	1	20230928_210230	230928_EC1_apagotto_AP14bis_XII_Mpro_1.raw	3	38073	P00748	0.759	408	0	0.996446	247531600	19	True	True	2109.39	EQPPSLTRNGPLSCGQRLR	0	4	_EQPPSLTRNGPLSC[Carbamidomethyl (C)]GQRLR_	8	33.2854	155310
3.2.220222.52329	20230928_apagotto_AP14bis_FXII_all1ul_inj_F12fastasearchpluscontaminants	1	20230928_210230	230928_EC1_apagotto_AP14bis_XII_Mpro_1.raw	3	38073	P00748	0.759	408	0	0.996446	247531600	19	True	True	1968.24	QRLASQACRTNPCLHGGR	0	4	_[DimethNter0]QRLASQAC[Carbamidomethyl (C)]RTNPC[Carbamidomethyl (C)]LHGGR_	7	20.113	138415
3.2.220222.52329	20230928_apagotto_AP14bis_FXII_all1ul_inj_F12fastasearchpluscontaminants	1	20230928_210230	230928_EC1_apagotto_AP14bis_XII_Mpro_1.raw	3	38073	P00748	0.759	408	0	0.996446	247531600	19	True	True	1968.24	QRLASQACRTNPCLHGGR	0	4	_QRLASQAC[Carbamidomethyl (C)]RTNPC[Carbamidomethyl (C)]LHGGR_	7	19.8557	38212.4
3.2.220222.52329	20230928_apagotto_AP14bis_FXII_all1ul_inj_F12fastasearchpluscontaminants	1	20230928_210230	230928_EC1_apagotto_AP14bis_XII_Mpro_1.raw	3	38073	P00748	0.759	408	0	0.996446	247531600	19	True	True	1968.24	QRLASQACRTNPCLHGGR	0	5	_[DimethNter0]QRLASQAC[Carbamidomethyl (C)]RTNPC[Carbamidomethyl (C)]LHGGR_	5	20.113	86503.7
3.2.220222.52329	20230928_apagotto_AP14bis_FXII_all1ul_inj_F12fastasearchpluscontaminants	1	20230928_210230	230928_EC1_apagotto_AP14bis_XII_Mpro_1.raw	3	38073	P00748	0.759	408	0	0.996446	247531600	19	True	True	2902.25	NWGLGGHAFCRNPDNDIRPWCFVLN	0.00396825	4	_NWGLGGHAFC[Carbamidomethyl (C)]RNPDNDIRPWC[Carbamidomethyl (C)]FVLN_	8	60.6914	123666
3.2.220222.52329	20230928_apagotto_AP14bis_FXII_all1ul_inj_F12fastasearchpluscontaminants	1	20230928_210230	230928_EC1_apagotto_AP14bis_XII_Mpro_1.raw	3	38073	P00748	0.759	408	0	0.996446	247531600	19	True	True	2130.45	VVLTVTGEPCHFPFQYHR	0	4	_[DimethNter0]VVLTVTGEPC[Carbamidomethyl (C)]HFPFQYHR_	8	50.1081	118264
3.2.220222.52329	20230928_apagotto_AP14bis_FXII_all1ul_inj_F12fastasearchpluscontaminants	1	20230928_210230	230928_EC1_apagotto_AP14bis_XII_Mpro_1.raw	3	38073	P00748	0.759	408	0	0.996446	247531600	19	True	True	1295.49	CLEVEGHRLCH	0	2	_C[Carbamidomethyl (C)]LEVEGHRLC[Carbamidomethyl (C)]H_	6	26.5052	105933
3.2.220222.52329	20230928_apagotto_AP14bis_FXII_all1ul_inj_F12fastasearchpluscontaminants	1	20230928_210230	230928_EC1_apagotto_AP14bis_XII_Mpro_1.raw	3	38073	P00748	0.759	408	0	0.996446	247531600	19	True	True	1470.68	LASQACRTNPCLHG	0	3	_LASQAC[Carbamidomethyl (C)]RTNPC[Carbamidomethyl (C)]LHG_	8	21.424	155412
3.2.220222.52329	20230928_apagotto_AP14bis_FXII_all1ul_inj_F12fastasearchpluscontaminants	1	20230928_210230	230928_EC1_apagotto_AP14bis_XII_Mpro_1.raw	3	38073	P00748	0.759	408	0	0.996446	247531600	19	True	True	1110.25	RTNPCLHGGR	0	3	_RTNPC[Carbamidomethyl (C)]LHGGR_	8	13.6558	98724.4
3.2.220222.52329	20230928_apagotto_AP14bis_FXII_all1ul_inj_F12fastasearchpluscontaminants	1	20230928_210230	230928_EC1_apagotto_AP14bis_XII_Mpro_1.raw	3	38073	P00748	0.759	408	0	0.996446	247531600	19	True	True	1110.25	RTNPCLHGGR	0	3	_[DimethNter0]RTNPC[Carbamidomethyl (C)]LHGGR_	1	13.7557	17809.7
3.2.220222.52329	20230928_apagotto_AP14bis_FXII_all1ul_inj_F12fastasearchpluscontaminants	1	20230928_210230	230928_EC1_apagotto_AP14bis_XII_Mpro_1.raw	3	38073	P00748	0.759	408	0	0.996446	247531600	19	True	True	1846.07	EAFSPVSYQHDLALLR	0	3	_EAFSPVSYQHDLALLR_	8	54.608	91818.6
3.2.220222.52329	20230928_apagotto_AP14bis_FXII_all1ul_inj_F12fastasearchpluscontaminants	1	20230928_210230	230928_EC1_apagotto_AP14bis_XII_Mpro_1.raw	3	38073	P00748	0.759	408	0	0.996446	247531600	19	True	True	1164.28	YRTEQAAVAR	0	3	_YRTEQAAVAR_	8	18.3904	83511.8
3.2.220222.52329	20230928_apagotto_AP14bis_FXII_all1ul_inj_F12fastasearchpluscontaminants	1	20230928_210230	230928_EC1_apagotto_AP14bis_XII_Mpro_1.raw	3	38073	P00748	0.759	408	0	0.996446	247531600	19	True	True	1759.86	GDSGGPLVCEDQAAERR	0	3	_GDSGGPLVC[Carbamidomethyl (C)]EDQAAERR_	8	27.3135	69345.8
3.2.220222.52329	20230928_apagotto_AP14bis_FXII_all1ul_inj_F12fastasearchpluscontaminants	1	20230928_210230	230928_EC1_apagotto_AP14bis_XII_Mpro_1.raw	3	38073	P00748	0.759	408	0	0.996446	247531600	19	True	True	1148.33	RGLSYRGLAR	0	3	_RGLSYRGLAR_	8	24.7329	95339.5
3.2.220222.52329	20230928_apagotto_AP14bis_FXII_all1ul_inj_F12fastasearchpluscontaminants	1	20230928_210230	230928_EC1_apagotto_AP14bis_XII_Mpro_1.raw	3	38073	P00748	0.759	408	0	0.996446	247531600	19	True	True	1016.18	EPCQTLAVR	0	2	_EPC[Carbamidomethyl (C)]QTLAVR_	8	28.8327	56128.7
3.2.220222.52329	20230928_apagotto_AP14bis_FXII_all1ul_inj_F12fastasearchpluscontaminants	1	20230928_210230	230928_EC1_apagotto_AP14bis_XII_Mpro_1.raw	3	38073	P00748	0.759	408	0	0.996446	247531600	19	True	True	1158.35	CLEVEGHRLC	0	2	_C[Carbamidomethyl (C)]LEVEGHRLC[Carbamidomethyl (C)]_	8	35.8696	42044.9
3.2.220222.52329	20230928_apagotto_AP14bis_FXII_all1ul_inj_F12fastasearchpluscontaminants	1	20230928_210230	230928_EC1_apagotto_AP14bis_XII_Mpro_1.raw	3	38073	P00748	0.759	408	0	0.996446	247531600	19	True	True	1305.45	SYRLHEAFSPV	0	3	_SYRLHEAFSPV_	7	38.7137	1647176
3.2.220222.52329	20230928_apagotto_AP14bis_FXII_all1ul_inj_F12fastasearchpluscontaminants	1	20230928_210230	230928_EC1_apagotto_AP14bis_XII_Mpro_1.raw	3	38073	P00748	0.759	408	0	0.996446	247531600	19	True	True	1305.45	SYRLHEAFSPV	0	2	_SYRLHEAFSPV_	6	38.7137	8468371
3.2.220222.52329	20230928_apagotto_AP14bis_FXII_all1ul_inj_F12fastasearchpluscontaminants	1	20230928_210230	230928_EC1_apagotto_AP14bis_XII_Mpro_1.raw	3	38073	P00748	0.759	408	0	0.996446	247531600	19	True	True	1211.38	LAWIREHTVS	0	2	_LAWIREHTVS_	7	36.6564	361698
3.2.220222.52329	20230928_apagotto_AP14bis_FXII_all1ul_inj_F12fastasearchpluscontaminants	1	20230928_210230	230928_EC1_apagotto_AP14bis_XII_Mpro_1.raw	3	38073	P00748	0.759	408	0	0.996446	247531600	19	True	True	1211.38	LAWIREHTVS	0	2	_[DimethNter0]LAWIREHTVS_	1	38.1399	658228
3.2.220222.52329	20230928_apagotto_AP14bis_FXII_all1ul_inj_F12fastasearchpluscontaminants	1	20230928_210230	230928_EC1_apagotto_AP14bis_XII_Mpro_1.raw	3	38073	P00748	0.759	408	0	0.996446	247531600	19	True	True	1906.02	ACQGDSGGPLVCEDQAAER	0	2	_AC[Carbamidomethyl (C)]QGDSGGPLVC[Carbamidomethyl (C)]EDQAAER_	7	31.1827	1040437
3.2.220222.52329	20230928_apagotto_AP14bis_FXII_all1ul_inj_F12fastasearchpluscontaminants	1	20230928_210230	230928_EC1_apagotto_AP14bis_XII_Mpro_1.raw	3	38073	P00748	0.759	408	0	0.996446	247531600	19	True	True	1906.02	ACQGDSGGPLVCEDQAAER	0	2	_[DimethNter0]AC[Carbamidomethyl (C)]QGDSGGPLVC[Carbamidomethyl (C)]EDQAAER_	5	31.4652	412041
3.2.220222.52329	20230928_apagotto_AP14bis_FXII_all1ul_inj_F12fastasearchpluscontaminants	1	20230928_210230	230928_EC1_apagotto_AP14bis_XII_Mpro_1.raw	3	38073	P00748	0.759	408	0	0.996446	247531600	19	True	True	1041.12	EQPPSLTRN	0	2	_EQPPSLTRN_	7	25.3891	440746
3.2.220222.52329	20230928_apagotto_AP14bis_FXII_all1ul_inj_F12fastasearchpluscontaminants	1	20230928_210230	230928_EC1_apagotto_AP14bis_XII_Mpro_1.raw	3	38073	P00748	0.759	408	0	0.996446	247531600	19	True	True	1060.19	LASQACRTNP	0	2	_LASQAC[Carbamidomethyl (C)]RTNP_	7	18.7565	427229
3.2.220222.52329	20230928_apagotto_AP14bis_FXII_all1ul_inj_F12fastasearchpluscontaminants	1	20230928_210230	230928_EC1_apagotto_AP14bis_XII_Mpro_1.raw	3	38073	P00748	0.759	408	0	0.996446	247531600	19	True	True	1840.11	RLASQACRTNPCLHGGR	0	4	_RLASQAC[Carbamidomethyl (C)]RTNPC[Carbamidomethyl (C)]LHGGR_	7	18.3134	263904
3.2.220222.52329	20230928_apagotto_AP14bis_FXII_all1ul_inj_F12fastasearchpluscontaminants	1	20230928_210230	230928_EC1_apagotto_AP14bis_XII_Mpro_1.raw	3	38073	P00748	0.759	408	0	0.996446	247531600	19	True	True	1840.11	RLASQACRTNPCLHGGR	0	4	_[DimethNter0]RLASQAC[Carbamidomethyl (C)]RTNPC[Carbamidomethyl (C)]LHGGR_	4	18.7167	800074
3.2.220222.52329	20230928_apagotto_AP14bis_FXII_all1ul_inj_F12fastasearchpluscontaminants	1	20230928_210230	230928_EC1_apagotto_AP14bis_XII_Mpro_1.raw	3	38073	P00748	0.759	408	0	0.996446	247531600	19	True	True	2912.16	LHEAFSPVSYQHDLALLRLQEDADGS	0	3	_LHEAFSPVSYQHDLALLRLQEDADGS_	7	56.1043	598807
3.2.220222.52329	20230928_apagotto_AP14bis_FXII_all1ul_inj_F12fastasearchpluscontaminants	1	20230928_210230	230928_EC1_apagotto_AP14bis_XII_Mpro_1.raw	3	38073	P00748	0.759	408	0	0.996446	247531600	19	True	True	2119.37	FHKNEIWYRTEQAAVAR	0	4	_FHK[DimethLys0]NEIWYRTEQAAVAR_	7	33.2443	209318
3.2.220222.52329	20230928_apagotto_AP14bis_FXII_all1ul_inj_F12fastasearchpluscontaminants	1	20230928_210230	230928_EC1_apagotto_AP14bis_XII_Mpro_1.raw	3	38073	P00748	0.759	408	0	0.996446	247531600	19	True	True	1657.78	NWGLGGHAFCRNPDN	0	3	_NWGLGGHAFC[Carbamidomethyl (C)]RNPDN_	7	37.8654	823546
3.2.220222.52329	20230928_apagotto_AP14bis_FXII_all1ul_inj_F12fastasearchpluscontaminants	1	20230928_210230	230928_EC1_apagotto_AP14bis_XII_Mpro_1.raw	3	38073	P00748	0.759	408	0	0.996446	247531600	19	True	True	3301.82	PSGPHCLCPQHLTGNHCQKEKCFEPQLLR	0	6	_PSGPHC[Carbamidomethyl (C)]LC[Carbamidomethyl (C)]PQHLTGNHC[Carbamidomethyl (C)]QK[DimethLys0]EK[DimethLys0]C[Carbamidomethyl (C)]FEPQLLR_	7	33.3711	318212
3.2.220222.52329	20230928_apagotto_AP14bis_FXII_all1ul_inj_F12fastasearchpluscontaminants	1	20230928_210230	230928_EC1_apagotto_AP14bis_XII_Mpro_1.raw	3	38073	P00748	0.759	408	0	0.996446	247531600	19	True	True	3301.82	PSGPHCLCPQHLTGNHCQKEKCFEPQLLR	0	5	_PSGPHC[Carbamidomethyl (C)]LC[Carbamidomethyl (C)]PQHLTGNHC[Carbamidomethyl (C)]QK[DimethLys0]EK[DimethLys0]C[Carbamidomethyl (C)]FEPQLLR_	4	33.3711	120086
3.2.220222.52329	20230928_apagotto_AP14bis_FXII_all1ul_inj_F12fastasearchpluscontaminants	1	20230928_210230	230928_EC1_apagotto_AP14bis_XII_Mpro_1.raw	3	38073	P00748	0.759	408	0	0.996446	247531600	19	True	True	1518.66	TTLSGAPCQPWASEA	0	2	_TTLSGAPC[Carbamidomethyl (C)]QPWASEA_	7	48.073	147759
3.2.220222.52329	20230928_apagotto_AP14bis_FXII_all1ul_inj_F12fastasearchpluscontaminants	1	20230928_210230	230928_EC1_apagotto_AP14bis_XII_Mpro_1.raw	3	38073	P00748	0.759	408	0	0.996446	247531600	19	True	True	2231.55	TNPCLHGGRCLEVEGHRLCH	0	3	_TNPC[Carbamidomethyl (C)]LHGGRC[Carbamidomethyl (C)]LEVEGHRLC[Carbamidomethyl (C)]H_	6	26.4519	217290
3.2.220222.52329	20230928_apagotto_AP14bis_FXII_all1ul_inj_F12fastasearchpluscontaminants	1	20230928_210230	230928_EC1_apagotto_AP14bis_XII_Mpro_1.raw	3	38073	P00748	0.759	408	0	0.996446	247531600	19	True	True	1214.31	VDTKASCYDGR	0	3	_VDTK[DimethLys0]ASC[Carbamidomethyl (C)]YDGR_	7	18.9204	88173.9
3.2.220222.52329	20230928_apagotto_AP14bis_FXII_all1ul_inj_F12fastasearchpluscontaminants	1	20230928_210230	230928_EC1_apagotto_AP14bis_XII_Mpro_1.raw	3	38073	P00748	0.759	408	0	0.996446	247531600	19	True	True	1546.62	DSGGPLVCEDQAAER	0	2	_DSGGPLVC[Carbamidomethyl (C)]EDQAAER_	7	31.7755	149023
3.2.220222.52329	20230928_apagotto_AP14bis_FXII_all1ul_inj_F12fastasearchpluscontaminants	1	20230928_210230	230928_EC1_apagotto_AP14bis_XII_Mpro_1.raw	3	38073	P00748	0.759	408	0	0.996446	247531600	19	True	True	816.926	GPLSCGQR	0	2	_GPLSC[Carbamidomethyl (C)]GQR_	7	19.6365	59698.4
3.2.220222.52329	20230928_apagotto_AP14bis_FXII_all1ul_inj_F12fastasearchpluscontaminants	1	20230928_210230	230928_EC1_apagotto_AP14bis_XII_Mpro_1.raw	3	38073	P00748	0.759	408	0	0.996446	247531600	19	True	True	1178.41	LRKSLSSMTR	0	2	_LRK[DimethLys0]SLSSMTR_	4	20.2665	4854071
3.2.220222.52329	20230928_apagotto_AP14bis_FXII_all1ul_inj_F12fastasearchpluscontaminants	1	20230928_210230	230928_EC1_apagotto_AP14bis_XII_Mpro_1.raw	3	38073	P00748	0.759	408	0	0.996446	247531600	19	True	True	1178.41	LRKSLSSMTR	0	3	_LRK[DimethLys0]SLSSMTR_	3	20.2665	108947300
3.2.220222.52329	20230928_apagotto_AP14bis_FXII_all1ul_inj_F12fastasearchpluscontaminants	1	20230928_210230	230928_EC1_apagotto_AP14bis_XII_Mpro_1.raw	3	38073	P00748	0.759	408	0	0.996446	247531600	19	True	True	1178.41	LRKSLSSMTR	0	3	_[DimethNter0]LRK[DimethLys0]SLSSMTR_	3	20.5753	2126878
3.2.220222.52329	20230928_apagotto_AP14bis_FXII_all1ul_inj_F12fastasearchpluscontaminants	1	20230928_210230	230928_EC1_apagotto_AP14bis_XII_Mpro_1.raw	3	38073	P00748	0.759	408	0	0.996446	247531600	19	True	True	1413.63	LASQACRTNPCLH	0	3	_LASQAC[Carbamidomethyl (C)]RTNPC[Carbamidomethyl (C)]LH_	5	21.4727	62150120
3.2.220222.52329	20230928_apagotto_AP14bis_FXII_all1ul_inj_F12fastasearchpluscontaminants	1	20230928_210230	230928_EC1_apagotto_AP14bis_XII_Mpro_1.raw	3	38073	P00748	0.759	408	0	0.996446	247531600	19	True	True	1413.63	LASQACRTNPCLH	0	2	_LASQAC[Carbamidomethyl (C)]RTNPC[Carbamidomethyl (C)]LH_	3	21.4727	33980290
3.2.220222.52329	20230928_apagotto_AP14bis_FXII_all1ul_inj_F12fastasearchpluscontaminants	1	20230928_210230	230928_EC1_apagotto_AP14bis_XII_Mpro_1.raw	3	38073	P00748	0.759	408	0	0.996446	247531600	19	True	True	2005.22	LQEDADGSCALLSPYVQPV	0	2	_LQEDADGSC[Carbamidomethyl (C)]ALLSPYVQPV_	6	62.5176	863128
3.2.220222.52329	20230928_apagotto_AP14bis_FXII_all1ul_inj_F12fastasearchpluscontaminants	1	20230928_210230	230928_EC1_apagotto_AP14bis_XII_Mpro_1.raw	3	38073	P00748	0.759	408	0	0.996446	247531600	19	True	True	3174.47	SYRLHEAFSPVSYQHDLALLRLQEDAD	0	4	_SYRLHEAFSPVSYQHDLALLRLQEDAD_	6	53.9581	1483999
3.2.220222.52329	20230928_apagotto_AP14bis_FXII_all1ul_inj_F12fastasearchpluscontaminants	1	20230928_210230	230928_EC1_apagotto_AP14bis_XII_Mpro_1.raw	3	38073	P00748	0.759	408	0	0.996446	247531600	19	True	True	3174.47	SYRLHEAFSPVSYQHDLALLRLQEDAD	0	3	_SYRLHEAFSPVSYQHDLALLRLQEDAD_	2	53.9581	674740
3.2.220222.52329	20230928_apagotto_AP14bis_FXII_all1ul_inj_F12fastasearchpluscontaminants	1	20230928_210230	230928_EC1_apagotto_AP14bis_XII_Mpro_1.raw	3	38073	P00748	0.759	408	0	0.996446	247531600	19	True	True	2281.63	HLTGNHCQKEKCFEPQLLR	0	5	_[DimethNter0]HLTGNHC[Carbamidomethyl (C)]QK[DimethLys0]EK[DimethLys0]C[Carbamidomethyl (C)]FEPQLLR_	6	30.5146	392670
3.2.220222.52329	20230928_apagotto_AP14bis_FXII_all1ul_inj_F12fastasearchpluscontaminants	1	20230928_210230	230928_EC1_apagotto_AP14bis_XII_Mpro_1.raw	3	38073	P00748	0.759	408	0	0.996446	247531600	19	True	True	2281.63	HLTGNHCQKEKCFEPQLLR	0	4	_[DimethNter0]HLTGNHC[Carbamidomethyl (C)]QK[DimethLys0]EK[DimethLys0]C[Carbamidomethyl (C)]FEPQLLR_	3	30.5146	629152
3.2.220222.52329	20230928_apagotto_AP14bis_FXII_all1ul_inj_F12fastasearchpluscontaminants	1	20230928_210230	230928_EC1_apagotto_AP14bis_XII_Mpro_1.raw	3	38073	P00748	0.759	408	0	0.996446	247531600	19	True	True	1088.27	QVPFLSLER	0	2	_QVPFLSLER_	6	54.1054	454050
3.2.220222.52329	20230928_apagotto_AP14bis_FXII_all1ul_inj_F12fastasearchpluscontaminants	1	20230928_210230	230928_EC1_apagotto_AP14bis_XII_Mpro_1.raw	3	38073	P00748	0.759	408	0	0.996446	247531600	19	True	True	1022.12	SYRLHEAF	0.00203666	2	_SYRLHEAF_	6	31.4652	410836
3.2.220222.52329	20230928_apagotto_AP14bis_FXII_all1ul_inj_F12fastasearchpluscontaminants	1	20230928_210230	230928_EC1_apagotto_AP14bis_XII_Mpro_1.raw	3	38073	P00748	0.759	408	0	0.996446	247531600	19	True	True	2554.98	VVGGLVALRGAHPYIAALYWGHSF	0	3	_VVGGLVALRGAHPYIAALYWGHSF_	6	63.7971	303934
3.2.220222.52329	20230928_apagotto_AP14bis_FXII_all1ul_inj_F12fastasearchpluscontaminants	1	20230928_210230	230928_EC1_apagotto_AP14bis_XII_Mpro_1.raw	3	38073	P00748	0.759	408	0	0.996446	247531600	19	True	True	1749.98	HSCEPCQTLAVRSYR	0	3	_HSC[Carbamidomethyl (C)]EPC[Carbamidomethyl (C)]QTLAVRSYR_	6	27.361	604139
3.2.220222.52329	20230928_apagotto_AP14bis_FXII_all1ul_inj_F12fastasearchpluscontaminants	1	20230928_210230	230928_EC1_apagotto_AP14bis_XII_Mpro_1.raw	3	38073	P00748	0.759	408	0	0.996446	247531600	19	True	True	1797.99	FFHKNEIWYRTEQ	0.00203666	3	_FFHK[DimethLys0]NEIWYRTEQ_	6	36.6564	187500
3.2.220222.52329	20230928_apagotto_AP14bis_FXII_all1ul_inj_F12fastasearchpluscontaminants	1	20230928_210230	230928_EC1_apagotto_AP14bis_XII_Mpro_1.raw	3	38073	P00748	0.759	408	0	0.996446	247531600	19	True	True	2172.43	TEQAAVARCQCKGPDAHCQR	0	5	_TEQAAVARC[Carbamidomethyl (C)]QC[Carbamidomethyl (C)]K[DimethLys0]GPDAHC[Carbamidomethyl (C)]QR_	5	17.2713	155616
3.2.220222.52329	20230928_apagotto_AP14bis_FXII_all1ul_inj_F12fastasearchpluscontaminants	1	20230928_210230	230928_EC1_apagotto_AP14bis_XII_Mpro_1.raw	3	38073	P00748	0.759	408	0	0.996446	247531600	19	True	True	2172.43	TEQAAVARCQCKGPDAHCQR	0	3	_TEQAAVARC[Carbamidomethyl (C)]QC[Carbamidomethyl (C)]K[DimethLys0]GPDAHC[Carbamidomethyl (C)]QR_	3	17.2599	133210
3.2.220222.52329	20230928_apagotto_AP14bis_FXII_all1ul_inj_F12fastasearchpluscontaminants	1	20230928_210230	230928_EC1_apagotto_AP14bis_XII_Mpro_1.raw	3	38073	P00748	0.759	408	0	0.996446	247531600	19	True	True	3117.53	KYKAEEHTVVLTVTGEPCHFPFQYHR	0	5	_[DimethNter0]K[DimethLys0]YK[DimethLys0]AEEHTVVLTVTGEPC[Carbamidomethyl (C)]HFPFQYHR_	6	42.3703	138590
3.2.220222.52329	20230928_apagotto_AP14bis_FXII_all1ul_inj_F12fastasearchpluscontaminants	1	20230928_210230	230928_EC1_apagotto_AP14bis_XII_Mpro_1.raw	3	38073	P00748	0.759	408	0	0.996446	247531600	19	True	True	2320.72	VVGGLVALRGAHPYIAALYWGH	0	3	_VVGGLVALRGAHPYIAALYWGH_	6	59.9964	134577
3.2.220222.52329	20230928_apagotto_AP14bis_FXII_all1ul_inj_F12fastasearchpluscontaminants	1	20230928_210230	230928_EC1_apagotto_AP14bis_XII_Mpro_1.raw	3	38073	P00748	0.759	408	0	0.996446	247531600	19	True	True	2744.1	SYRLHEAFSPVSYQHDLALLRLQ	0	4	_SYRLHEAFSPVSYQHDLALLRLQ_	6	54.3514	113826
3.2.220222.52329	20230928_apagotto_AP14bis_FXII_all1ul_inj_F12fastasearchpluscontaminants	1	20230928_210230	230928_EC1_apagotto_AP14bis_XII_Mpro_1.raw	3	38073	P00748	0.759	408	0	0.996446	247531600	19	True	True	963.072	LASQACRTN	0	2	_LASQAC[Carbamidomethyl (C)]RTN_	6	14.4282	165155
3.2.220222.52329	20230928_apagotto_AP14bis_FXII_all1ul_inj_F12fastasearchpluscontaminants	1	20230928_210230	230928_EC1_apagotto_AP14bis_XII_Mpro_1.raw	3	38073	P00748	0.759	408	0	0.996446	247531600	19	True	True	1284.47	ACRTNPCLHGGR	0	3	_AC[Carbamidomethyl (C)]RTNPC[Carbamidomethyl (C)]LHGGR_	6	14.2706	57307.2
3.2.220222.52329	20230928_apagotto_AP14bis_FXII_all1ul_inj_F12fastasearchpluscontaminants	1	20230928_210230	230928_EC1_apagotto_AP14bis_XII_Mpro_1.raw	3	38073	P00748	0.759	408	0	0.996446	247531600	19	True	True	1284.47	ACRTNPCLHGGR	0	4	_[DimethNter0]AC[Carbamidomethyl (C)]RTNPC[Carbamidomethyl (C)]LHGGR_	2	14.4894	102796
3.2.220222.52329	20230928_apagotto_AP14bis_FXII_all1ul_inj_F12fastasearchpluscontaminants	1	20230928_210230	230928_EC1_apagotto_AP14bis_XII_Mpro_1.raw	3	38073	P00748	0.759	408	0	0.996446	247531600	19	True	True	1086.17	YDGRGLSYR	0.00203666	3	_[DimethNter0]YDGRGLSYR_	1	26.2149	44221.2
3.2.220222.52329	20230928_apagotto_AP14bis_FXII_all1ul_inj_F12fastasearchpluscontaminants	1	20230928_210230	230928_EC1_apagotto_AP14bis_XII_Mpro_1.raw	3	38073	P00748	0.759	408	0	0.996446	247531600	19	True	True	1662.88	LTLQGIISWGSGCGDR	0	2	_LTLQGIISWGSGC[Carbamidomethyl (C)]GDR_	5	64.3414	3780328
3.2.220222.52329	20230928_apagotto_AP14bis_FXII_all1ul_inj_F12fastasearchpluscontaminants	1	20230928_210230	230928_EC1_apagotto_AP14bis_XII_Mpro_1.raw	3	38073	P00748	0.759	408	0	0.996446	247531600	19	True	True	1215.37	SYQHDLALLR	0	3	_SYQHDLALLR_	5	39.192	2712034
3.2.220222.52329	20230928_apagotto_AP14bis_FXII_all1ul_inj_F12fastasearchpluscontaminants	1	20230928_210230	230928_EC1_apagotto_AP14bis_XII_Mpro_1.raw	3	38073	P00748	0.759	408	0	0.996446	247531600	19	True	True	1215.37	SYQHDLALLR	0	2	_SYQHDLALLR_	4	39.142	586679
3.2.220222.52329	20230928_apagotto_AP14bis_FXII_all1ul_inj_F12fastasearchpluscontaminants	1	20230928_210230	230928_EC1_apagotto_AP14bis_XII_Mpro_1.raw	3	38073	P00748	0.759	408	0	0.996446	247531600	19	True	True	1483.65	YDGRGLSYRGLAR	0	3	_YDGRGLSYRGLAR_	5	30.5146	945230
3.2.220222.52329	20230928_apagotto_AP14bis_FXII_all1ul_inj_F12fastasearchpluscontaminants	1	20230928_210230	230928_EC1_apagotto_AP14bis_XII_Mpro_1.raw	3	38073	P00748	0.759	408	0	0.996446	247531600	19	True	True	1483.65	YDGRGLSYRGLAR	0	3	_[DimethNter0]YDGRGLSYRGLAR_	4	31.0861	451420
3.2.220222.52329	20230928_apagotto_AP14bis_FXII_all1ul_inj_F12fastasearchpluscontaminants	1	20230928_210230	230928_EC1_apagotto_AP14bis_XII_Mpro_1.raw	3	38073	P00748	0.759	408	0	0.996446	247531600	19	True	True	1282.46	AKREQPPSLTR	0	3	_[DimethNter0]AK[DimethLys0]REQPPSLTR_	5	20.1425	694803
3.2.220222.52329	20230928_apagotto_AP14bis_FXII_all1ul_inj_F12fastasearchpluscontaminants	1	20230928_210230	230928_EC1_apagotto_AP14bis_XII_Mpro_1.raw	3	38073	P00748	0.759	408	0	0.996446	247531600	19	True	True	2031.31	VLTVTGEPCHFPFQYHR	0	3	_VLTVTGEPC[Carbamidomethyl (C)]HFPFQYHR_	5	46.0402	874445
3.2.220222.52329	20230928_apagotto_AP14bis_FXII_all1ul_inj_F12fastasearchpluscontaminants	1	20230928_210230	230928_EC1_apagotto_AP14bis_XII_Mpro_1.raw	3	38073	P00748	0.759	408	0	0.996446	247531600	19	True	True	2031.31	VLTVTGEPCHFPFQYHR	0	4	_VLTVTGEPC[Carbamidomethyl (C)]HFPFQYHR_	2	46.0402	374090
3.2.220222.52329	20230928_apagotto_AP14bis_FXII_all1ul_inj_F12fastasearchpluscontaminants	1	20230928_210230	230928_EC1_apagotto_AP14bis_XII_Mpro_1.raw	3	38073	P00748	0.759	408	0	0.996446	247531600	19	True	True	1574.86	IRPWCFVLNRDR	0	3	_IRPWC[Carbamidomethyl (C)]FVLNRDR_	5	45.9409	425108
3.2.220222.52329	20230928_apagotto_AP14bis_FXII_all1ul_inj_F12fastasearchpluscontaminants	1	20230928_210230	230928_EC1_apagotto_AP14bis_XII_Mpro_1.raw	3	38073	P00748	0.759	408	0	0.996446	247531600	19	True	True	2988.3	SYRLHEAFSPVSYQHDLALLRLQED	0	4	_SYRLHEAFSPVSYQHDLALLRLQED_	5	54.0073	366034
3.2.220222.52329	20230928_apagotto_AP14bis_FXII_all1ul_inj_F12fastasearchpluscontaminants	1	20230928_210230	230928_EC1_apagotto_AP14bis_XII_Mpro_1.raw	3	38073	P00748	0.759	408	0	0.996446	247531600	19	True	True	4490.02	SYRLHEAFSPVSYQHDLALLRLQEDADGSCALLSPYVQPV	0.00203666	5	_SYRLHEAFSPVSYQHDLALLRLQEDADGSC[Carbamidomethyl (C)]ALLSPYVQPV_	5	63.5491	379931
3.2.220222.52329	20230928_apagotto_AP14bis_FXII_all1ul_inj_F12fastasearchpluscontaminants	1	20230928_210230	230928_EC1_apagotto_AP14bis_XII_Mpro_1.raw	3	38073	P00748	0.759	408	0	0.996446	247531600	19	True	True	4490.02	SYRLHEAFSPVSYQHDLALLRLQEDADGSCALLSPYVQPV	0.00203666	4	_SYRLHEAFSPVSYQHDLALLRLQEDADGSC[Carbamidomethyl (C)]ALLSPYVQPV_	4	63.4989	1104265
3.2.220222.52329	20230928_apagotto_AP14bis_FXII_all1ul_inj_F12fastasearchpluscontaminants	1	20230928_210230	230928_EC1_apagotto_AP14bis_XII_Mpro_1.raw	3	38073	P00748	0.759	408	0	0.996446	247531600	19	True	True	2637.87	THKGRPGPQPWCATTPNFDQDQR	0	4	_[DimethNter0]THK[DimethLys0]GRPGPQPWC[Carbamidomethyl (C)]ATTPNFDQDQR_	5	32.7563	150755
3.2.220222.52329	20230928_apagotto_AP14bis_FXII_all1ul_inj_F12fastasearchpluscontaminants	1	20230928_210230	230928_EC1_apagotto_AP14bis_XII_Mpro_1.raw	3	38073	P00748	0.759	408	0	0.996446	247531600	19	True	True	1086.27	GPLSCGQRLR	0	3	_GPLSC[Carbamidomethyl (C)]GQRLR_	5	22.9295	103379
3.2.220222.52329	20230928_apagotto_AP14bis_FXII_all1ul_inj_F12fastasearchpluscontaminants	1	20230928_210230	230928_EC1_apagotto_AP14bis_XII_Mpro_1.raw	3	38073	P00748	0.759	408	0	0.996446	247531600	19	True	True	1462.64	LHGGRCLEVEGHR	0	3	_LHGGRC[Carbamidomethyl (C)]LEVEGHR_	5	18.4508	73927.3
3.2.220222.52329	20230928_apagotto_AP14bis_FXII_all1ul_inj_F12fastasearchpluscontaminants	1	20230928_210230	230928_EC1_apagotto_AP14bis_XII_Mpro_1.raw	3	38073	P00748	0.759	408	0	0.996446	247531600	19	True	True	1287.41	GPLVCEDQAAER	0	2	_GPLVC[Carbamidomethyl (C)]EDQAAER_	5	27.9822	49693
3.2.220222.52329	20230928_apagotto_AP14bis_FXII_all1ul_inj_F12fastasearchpluscontaminants	1	20230928_210230	230928_EC1_apagotto_AP14bis_XII_Mpro_1.raw	3	38073	P00748	0.759	408	0	0.996446	247531600	19	True	True	1027.14	WIREHTVS	0.00203666	2	_[DimethNter0]WIREHTVS_	3	21.5225	6746794
3.2.220222.52329	20230928_apagotto_AP14bis_FXII_all1ul_inj_F12fastasearchpluscontaminants	1	20230928_210230	230928_EC1_apagotto_AP14bis_XII_Mpro_1.raw	3	38073	P00748	0.759	408	0	0.996446	247531600	19	True	True	1027.14	WIREHTVS	0.00203666	2	_WIREHTVS_	2	22.0247	105602
3.2.220222.52329	20230928_apagotto_AP14bis_FXII_all1ul_inj_F12fastasearchpluscontaminants	1	20230928_210230	230928_EC1_apagotto_AP14bis_XII_Mpro_1.raw	3	38073	P00748	0.759	408	0	0.996446	247531600	19	True	True	934.058	FFHKNEI	0.00203666	2	_FFHK[DimethLys0]NEI_	4	27.6768	892637
3.2.220222.52329	20230928_apagotto_AP14bis_FXII_all1ul_inj_F12fastasearchpluscontaminants	1	20230928_210230	230928_EC1_apagotto_AP14bis_XII_Mpro_1.raw	3	38073	P00748	0.759	408	0	0.996446	247531600	19	True	True	1098.22	AWIREHTVS	0	3	_[DimethNter0]AWIREHTVS_	2	27.5488	434627
3.2.220222.52329	20230928_apagotto_AP14bis_FXII_all1ul_inj_F12fastasearchpluscontaminants	1	20230928_210230	230928_EC1_apagotto_AP14bis_XII_Mpro_1.raw	3	38073	P00748	0.759	408	0	0.996446	247531600	19	True	True	1537.73	YYLAWIREHTVS	0	2	_YYLAWIREHTVS_	2	49.454	749842
3.2.220222.52329	20230928_apagotto_AP14bis_FXII_all1ul_inj_F12fastasearchpluscontaminants	1	20230928_210230	230928_EC1_apagotto_AP14bis_XII_Mpro_1.raw	3	38073	P00748	0.759	408	0	0.996446	247531600	19	True	True	1537.73	YYLAWIREHTVS	0	3	_YYLAWIREHTVS_	1	49.5031	71816.8
3.2.220222.52329	20230928_apagotto_AP14bis_FXII_all1ul_inj_F12fastasearchpluscontaminants	1	20230928_210230	230928_EC1_apagotto_AP14bis_XII_Mpro_1.raw	3	38073	P00748	0.759	408	0	0.996446	247531600	19	True	True	1836.08	RPAPEDLTVVLGQERR	0	3	_RPAPEDLTVVLGQERR_	2	41.3252	347454
3.2.220222.52329	20230928_apagotto_AP14bis_FXII_all1ul_inj_F12fastasearchpluscontaminants	1	20230928_210230	230928_EC1_apagotto_AP14bis_XII_Mpro_1.raw	3	38073	P00748	0.759	408	0	0.996446	247531600	19	True	True	871.915	CSAPDVHGS	0	2	_C[Carbamidomethyl (C)]SAPDVHGS_	4	18.6418	202056
3.2.220222.52329	20230928_apagotto_AP14bis_FXII_all1ul_inj_F12fastasearchpluscontaminants	1	20230928_210230	230928_EC1_apagotto_AP14bis_XII_Mpro_1.raw	3	38073	P00748	0.759	408	0	0.996446	247531600	19	True	True	1163.33	LASQACRTNPC	0.00203666	2	_LASQAC[Carbamidomethyl (C)]RTNPC[Carbamidomethyl (C)]_	4	20.0404	114574
3.2.220222.52329	20230928_apagotto_AP14bis_FXII_all1ul_inj_F12fastasearchpluscontaminants	1	20230928_210230	230928_EC1_apagotto_AP14bis_XII_Mpro_1.raw	3	38073	P00748	0.759	408	0	0.996446	247531600	19	True	True	1776.98	LTLQGIISWGSGCGDRN	0	2	_LTLQGIISWGSGC[Carbamidomethyl (C)]GDRN_	4	63.1572	146690
3.2.220222.52329	20230928_apagotto_AP14bis_FXII_all1ul_inj_F12fastasearchpluscontaminants	1	20230928_210230	230928_EC1_apagotto_AP14bis_XII_Mpro_1.raw	3	38073	P00748	0.759	408	0	0.996446	247531600	19	True	True	1213.39	CRTNPCLHGGR	0.00396825	3	_C[Carbamidomethyl (C)]RTNPC[Carbamidomethyl (C)]LHGGR_	3	14.0373	36539.9
3.2.220222.52329	20230928_apagotto_AP14bis_FXII_all1ul_inj_F12fastasearchpluscontaminants	1	20230928_210230	230928_EC1_apagotto_AP14bis_XII_Mpro_1.raw	3	38073	P00748	0.759	408	0	0.996446	247531600	19	True	True	1844.11	CKGPDAHCQRLASQACR	0	4	_[DimethNter0]C[Carbamidomethyl (C)]K[DimethLys0]GPDAHC[Carbamidomethyl (C)]QRLASQAC[Carbamidomethyl (C)]R_	3	18.5851	1571997
3.2.220222.52329	20230928_apagotto_AP14bis_FXII_all1ul_inj_F12fastasearchpluscontaminants	1	20230928_210230	230928_EC1_apagotto_AP14bis_XII_Mpro_1.raw	3	38073	P00748	0.759	408	0	0.996446	247531600	19	True	True	1207.32	GIISWGSGCGDR	0	2	_[DimethNter0]GIISWGSGC[Carbamidomethyl (C)]GDR_	3	43.4089	903406
3.2.220222.52329	20230928_apagotto_AP14bis_FXII_all1ul_inj_F12fastasearchpluscontaminants	1	20230928_210230	230928_EC1_apagotto_AP14bis_XII_Mpro_1.raw	3	38073	P00748	0.759	408	0	0.996446	247531600	19	True	True	5034.61	CSAPDVHGSSILPGMLCAGFLEGGTDACQGDSGGPLVCEDQAAERRLTLQ	0	4	_C[Carbamidomethyl (C)]SAPDVHGSSILPGMLC[Carbamidomethyl (C)]AGFLEGGTDAC[Carbamidomethyl (C)]QGDSGGPLVC[Carbamidomethyl (C)]EDQAAERRLTLQ_	3	64.1412	767324
3.2.220222.52329	20230928_apagotto_AP14bis_FXII_all1ul_inj_F12fastasearchpluscontaminants	1	20230928_210230	230928_EC1_apagotto_AP14bis_XII_Mpro_1.raw	3	38073	P00748	0.759	408	0	0.996446	247531600	19	True	True	5034.61	CSAPDVHGSSILPGMLCAGFLEGGTDACQGDSGGPLVCEDQAAERRLTLQ	0	4	_C[Carbamidomethyl (C)]SAPDVHGSSILPGM[Oxidation (M)]LC[Carbamidomethyl (C)]AGFLEGGTDAC[Carbamidomethyl (C)]QGDSGGPLVC[Carbamidomethyl (C)]EDQAAERRLTLQ_	1	59.5173	80855.4
3.2.220222.52329	20230928_apagotto_AP14bis_FXII_all1ul_inj_F12fastasearchpluscontaminants	1	20230928_210230	230928_EC1_apagotto_AP14bis_XII_Mpro_1.raw	3	38073	P00748	0.759	408	0	0.996446	247531600	19	True	True	995.156	WGYCLEPK	0	2	_WGYC[Carbamidomethyl (C)]LEPK_	3	42.5193	232285
3.2.220222.52329	20230928_apagotto_AP14bis_FXII_all1ul_inj_F12fastasearchpluscontaminants	1	20230928_210230	230928_EC1_apagotto_AP14bis_XII_Mpro_1.raw	3	38073	P00748	0.759	408	0	0.996446	247531600	19	True	True	1145.28	HKNEIWYR	0.00581395	3	_HK[DimethLys0]NEIWYR_	3	25.3891	215326
3.2.220222.52329	20230928_apagotto_AP14bis_FXII_all1ul_inj_F12fastasearchpluscontaminants	1	20230928_210230	230928_EC1_apagotto_AP14bis_XII_Mpro_1.raw	3	38073	P00748	0.759	408	0	0.996446	247531600	19	True	True	1212.34	GGRCLEVEGHR	0	3	_[DimethNter0]GGRC[Carbamidomethyl (C)]LEVEGHR_	3	18.2949	380959
3.2.220222.52329	20230928_apagotto_AP14bis_FXII_all1ul_inj_F12fastasearchpluscontaminants	1	20230928_210230	230928_EC1_apagotto_AP14bis_XII_Mpro_1.raw	3	38073	P00748	0.759	408	0	0.996446	247531600	19	True	True	1212.34	GGRCLEVEGHR	0	2	_[DimethNter0]GGRC[Carbamidomethyl (C)]LEVEGHR_	1	18.3475	184284
3.2.220222.52329	20230928_apagotto_AP14bis_FXII_all1ul_inj_F12fastasearchpluscontaminants	1	20230928_210230	230928_EC1_apagotto_AP14bis_XII_Mpro_1.raw	3	38073	P00748	0.759	408	0	0.996446	247531600	19	True	True	1076.19	TEQAAVARCQ	0	2	_TEQAAVARC[Carbamidomethyl (C)]Q_	3	18.0767	152669
3.2.220222.52329	20230928_apagotto_AP14bis_FXII_all1ul_inj_F12fastasearchpluscontaminants	1	20230928_210230	230928_EC1_apagotto_AP14bis_XII_Mpro_1.raw	3	38073	P00748	0.759	408	0	0.996446	247531600	19	True	True	3126.39	LCAGFLEGGTDACQGDSGGPLVCEDQAAERR	0	3	_LC[Carbamidomethyl (C)]AGFLEGGTDAC[Carbamidomethyl (C)]QGDSGGPLVC[Carbamidomethyl (C)]EDQAAERR_	3	48.073	129660
3.2.220222.52329	20230928_apagotto_AP14bis_FXII_all1ul_inj_F12fastasearchpluscontaminants	1	20230928_210230	230928_EC1_apagotto_AP14bis_XII_Mpro_1.raw	3	38073	P00748	0.759	408	0	0.996446	247531600	19	True	True	1114.26	CKGPDAHCQR	0.00929368	3	_[DimethNter0]C[Carbamidomethyl (C)]K[DimethLys0]GPDAHC[Carbamidomethyl (C)]QR_	3	13.6058	117946
3.2.220222.52329	20230928_apagotto_AP14bis_FXII_all1ul_inj_F12fastasearchpluscontaminants	1	20230928_210230	230928_EC1_apagotto_AP14bis_XII_Mpro_1.raw	3	38073	P00748	0.759	408	0	0.996446	247531600	19	True	True	1772.87	NWGLGGHAFCRNPDND	0	3	_NWGLGGHAFC[Carbamidomethyl (C)]RNPDND_	3	38.8001	98706.2
3.2.220222.52329	20230928_apagotto_AP14bis_FXII_all1ul_inj_F12fastasearchpluscontaminants	1	20230928_210230	230928_EC1_apagotto_AP14bis_XII_Mpro_1.raw	3	38073	P00748	0.759	408	0	0.996446	247531600	19	True	True	1374.56	YLAWIREHTVS	0	2	_YLAWIREHTVS_	3	42.6191	96443.9
3.2.220222.52329	20230928_apagotto_AP14bis_FXII_all1ul_inj_F12fastasearchpluscontaminants	1	20230928_210230	230928_EC1_apagotto_AP14bis_XII_Mpro_1.raw	3	38073	P00748	0.759	408	0	0.996446	247531600	19	True	True	2768.03	LHEAFSPVSYQHDLALLRLQEDAD	0	3	_LHEAFSPVSYQHDLALLRLQEDAD_	3	56.4	79731.9
3.2.220222.52329	20230928_apagotto_AP14bis_FXII_all1ul_inj_F12fastasearchpluscontaminants	1	20230928_210230	230928_EC1_apagotto_AP14bis_XII_Mpro_1.raw	3	38073	P00748	0.759	408	0	0.996446	247531600	19	True	True	1155.29	GRCLEVEGHR	0	3	_GRC[Carbamidomethyl (C)]LEVEGHR_	3	17.7359	52894.3
3.2.220222.52329	20230928_apagotto_AP14bis_FXII_all1ul_inj_F12fastasearchpluscontaminants	1	20230928_210230	230928_EC1_apagotto_AP14bis_XII_Mpro_1.raw	3	38073	P00748	0.759	408	0	0.996446	247531600	19	True	True	1869.06	FFHKNEIWYRTEQA	0.00767754	3	_FFHK[DimethLys0]NEIWYRTEQA_	2	37.0946	1109401
3.2.220222.52329	20230928_apagotto_AP14bis_FXII_all1ul_inj_F12fastasearchpluscontaminants	1	20230928_210230	230928_EC1_apagotto_AP14bis_XII_Mpro_1.raw	3	38073	P00748	0.759	408	0	0.996446	247531600	19	True	True	1001.11	RTEQAAVAR	0	2	_RTEQAAVAR_	2	13.8028	402096
3.2.220222.52329	20230928_apagotto_AP14bis_FXII_all1ul_inj_F12fastasearchpluscontaminants	1	20230928_210230	230928_EC1_apagotto_AP14bis_XII_Mpro_1.raw	3	38073	P00748	0.759	408	0	0.996446	247531600	19	True	True	1608.81	AYYLAWIREHTVS	0	2	_AYYLAWIREHTVS_	1	52.6766	546531
3.2.220222.52329	20230928_apagotto_AP14bis_FXII_all1ul_inj_F12fastasearchpluscontaminants	1	20230928_210230	230928_EC1_apagotto_AP14bis_XII_Mpro_1.raw	3	38073	P00748	0.759	408	0	0.996446	247531600	19	True	True	1663.98	VVGGLVALRGAHPYIAA	0	2	_VVGGLVALRGAHPYIAA_	2	49.5521	389355
3.2.220222.52329	20230928_apagotto_AP14bis_FXII_all1ul_inj_F12fastasearchpluscontaminants	1	20230928_210230	230928_EC1_apagotto_AP14bis_XII_Mpro_1.raw	3	38073	P00748	0.759	408	0	0.996446	247531600	19	True	True	1663.98	VVGGLVALRGAHPYIAA	0	3	_VVGGLVALRGAHPYIAA_	2	49.5521	277043
3.2.220222.52329	20230928_apagotto_AP14bis_FXII_all1ul_inj_F12fastasearchpluscontaminants	1	20230928_210230	230928_EC1_apagotto_AP14bis_XII_Mpro_1.raw	3	38073	P00748	0.759	408	0	0.996446	247531600	19	True	True	1518.79	QKEKCFEPQLLR	0	3	_[DimethNter0]QK[DimethLys0]EK[DimethLys0]C[Carbamidomethyl (C)]FEPQLLR_	2	33.5153	372656
3.2.220222.52329	20230928_apagotto_AP14bis_FXII_all1ul_inj_F12fastasearchpluscontaminants	1	20230928_210230	230928_EC1_apagotto_AP14bis_XII_Mpro_1.raw	3	38073	P00748	0.759	408	0	0.996446	247531600	19	True	True	1518.79	QKEKCFEPQLLR	0	4	_[DimethNter0]QK[DimethLys0]EK[DimethLys0]C[Carbamidomethyl (C)]FEPQLLR_	1	33.4897	98036.1
3.2.220222.52329	20230928_apagotto_AP14bis_FXII_all1ul_inj_F12fastasearchpluscontaminants	1	20230928_210230	230928_EC1_apagotto_AP14bis_XII_Mpro_1.raw	3	38073	P00748	0.759	408	0	0.996446	247531600	19	True	True	1592.9	VVGGLVALRGAHPYIA	0	2	_VVGGLVALRGAHPYIA_	2	48.9105	257718
3.2.220222.52329	20230928_apagotto_AP14bis_FXII_all1ul_inj_F12fastasearchpluscontaminants	1	20230928_210230	230928_EC1_apagotto_AP14bis_XII_Mpro_1.raw	3	38073	P00748	0.759	408	0	0.996446	247531600	19	True	True	727.785	CSAPDVH	0	2	_C[Carbamidomethyl (C)]SAPDVH_	2	18.4211	82926.4
3.2.220222.52329	20230928_apagotto_AP14bis_FXII_all1ul_inj_F12fastasearchpluscontaminants	1	20230928_210230	230928_EC1_apagotto_AP14bis_XII_Mpro_1.raw	3	38073	P00748	0.759	408	0	0.996446	247531600	19	True	True	2604.92	SGCGDRNKPGVYTDVAYYLAWIR	0	4	_[DimethNter0]SGC[Carbamidomethyl (C)]GDRNK[DimethLys0]PGVYTDVAYYLAWIR_	2	64.6498	82895
3.2.220222.52329	20230928_apagotto_AP14bis_FXII_all1ul_inj_F12fastasearchpluscontaminants	1	20230928_210230	230928_EC1_apagotto_AP14bis_XII_Mpro_1.raw	3	38073	P00748	0.759	408	0	0.996446	247531600	19	True	True	3720.19	LQEDADGSCALLSPYVQPVCLPSGAARPSETTLCQV	0	3	_LQEDADGSC[Carbamidomethyl (C)]ALLSPYVQPVC[Carbamidomethyl (C)]LPSGAARPSETTLC[Carbamidomethyl (C)]QV_	2	63.5491	81647.4
3.2.220222.52329	20230928_apagotto_AP14bis_FXII_all1ul_inj_F12fastasearchpluscontaminants	1	20230928_210230	230928_EC1_apagotto_AP14bis_XII_Mpro_1.raw	3	38073	P00748	0.759	408	0	0.996446	247531600	19	True	True	1686.97	CSAPDVHGSSILPGMLC	0.00929368	2	_C[Carbamidomethyl (C)]SAPDVHGSSILPGMLC[Carbamidomethyl (C)]_	2	54.9476	72722.8
3.2.220222.52329	20230928_apagotto_AP14bis_FXII_all1ul_inj_F12fastasearchpluscontaminants	1	20230928_210230	230928_EC1_apagotto_AP14bis_XII_Mpro_1.raw	3	38073	P00748	0.759	408	0	0.996446	247531600	19	True	True	1230.35	PLVCEDQAAER	0.00929368	2	_PLVC[Carbamidomethyl (C)]EDQAAER_	2	27.0425	86637.8
3.2.220222.52329	20230928_apagotto_AP14bis_FXII_all1ul_inj_F12fastasearchpluscontaminants	1	20230928_210230	230928_EC1_apagotto_AP14bis_XII_Mpro_1.raw	3	38073	P00748	0.759	408	0	0.996446	247531600	19	True	True	784.837	CSAPDVHG	0.00203666	2	_C[Carbamidomethyl (C)]SAPDVHG_	2	19.9195	56360.5
3.2.220222.52329	20230928_apagotto_AP14bis_FXII_all1ul_inj_F12fastasearchpluscontaminants	1	20230928_210230	230928_EC1_apagotto_AP14bis_XII_Mpro_1.raw	3	38073	P00748	0.759	408	0	0.996446	247531600	19	True	True	1940.31	VVGGLVALRGAHPYIAALY	0.00929368	3	_VVGGLVALRGAHPYIAALY_	2	58.9353	55601.1
3.2.220222.52329	20230928_apagotto_AP14bis_FXII_all1ul_inj_F12fastasearchpluscontaminants	1	20230928_210230	230928_EC1_apagotto_AP14bis_XII_Mpro_1.raw	3	38073	P00748	0.759	408	0	0.996446	247531600	19	True	True	1706.87	NEIWYRTEQAAVAR	0	3	_NEIWYRTEQAAVAR_	2	38.1399	39620.4
3.2.220222.52329	20230928_apagotto_AP14bis_FXII_all1ul_inj_F12fastasearchpluscontaminants	1	20230928_210230	230928_EC1_apagotto_AP14bis_XII_Mpro_1.raw	3	38073	P00748	0.759	408	0	0.996446	247531600	19	True	True	4083.58	LHEAFSPVSYQHDLALLRLQEDADGSCALLSPYVQPV	0	4	_LHEAFSPVSYQHDLALLRLQEDADGSC[Carbamidomethyl (C)]ALLSPYVQPV_	1	65.8994	510332
3.2.220222.52329	20230928_apagotto_AP14bis_FXII_all1ul_inj_F12fastasearchpluscontaminants	1	20230928_210230	230928_EC1_apagotto_AP14bis_XII_Mpro_1.raw	3	38073	P00748	0.759	408	0	0.996446	247531600	19	True	True	1594.88	CLEVEGHRLCHCPV	0	3	_C[Carbamidomethyl (C)]LEVEGHRLC[Carbamidomethyl (C)]HC[Carbamidomethyl (C)]PV_	1	31.0359	430308
3.2.220222.52329	20230928_apagotto_AP14bis_FXII_all1ul_inj_F12fastasearchpluscontaminants	1	20230928_210230	230928_EC1_apagotto_AP14bis_XII_Mpro_1.raw	3	38073	P00748	0.759	408	0	0.996446	247531600	19	True	True	1932.18	LTVTGEPCHFPFQYHR	0	4	_[DimethNter0]LTVTGEPC[Carbamidomethyl (C)]HFPFQYHR_	1	44.8959	354740
3.2.220222.52329	20230928_apagotto_AP14bis_FXII_all1ul_inj_F12fastasearchpluscontaminants	1	20230928_210230	230928_EC1_apagotto_AP14bis_XII_Mpro_1.raw	3	38073	P00748	0.759	408	0	0.996446	247531600	19	True	True	1932.18	LTVTGEPCHFPFQYHR	0	3	_[DimethNter0]LTVTGEPC[Carbamidomethyl (C)]HFPFQYHR_	1	44.8959	129048
3.2.220222.52329	20230928_apagotto_AP14bis_FXII_all1ul_inj_F12fastasearchpluscontaminants	1	20230928_210230	230928_EC1_apagotto_AP14bis_XII_Mpro_1.raw	3	38073	P00748	0.759	408	0	0.996446	247531600	19	True	True	780.89	SLSSMTR	0.00396825	2	_SLSSMTR_	1	22.1638	60852.2
3.2.220222.52329	20230928_apagotto_AP14bis_FXII_all1ul_inj_F12fastasearchpluscontaminants	1	20230928_210230	230928_EC1_apagotto_AP14bis_XII_Mpro_1.raw	3	38073	P00748	0.759	408	0	0.996446	247531600	19	True	True	1612.8	GPDAHCQRLASQACR	0	3	_GPDAHC[Carbamidomethyl (C)]QRLASQAC[Carbamidomethyl (C)]R_	1	18.7786	125996
3.2.220222.52329	20230928_apagotto_AP14bis_FXII_all1ul_inj_F12fastasearchpluscontaminants	1	20230928_210230	230928_EC1_apagotto_AP14bis_XII_Mpro_1.raw	3	38073	P00748	0.759	408	0	0.996446	247531600	19	True	True	887.06	PCQTLAVR	0	2	_PC[Carbamidomethyl (C)]QTLAVR_	1	26.0496	71653
3.2.220222.52329	20230928_apagotto_AP14bis_FXII_all1ul_inj_F12fastasearchpluscontaminants	1	20230928_210230	230928_EC1_apagotto_AP14bis_XII_Mpro_1.raw	3	38073	P00748	0.759	408	0	0.996446	247531600	19	True	True	1140.39	TRVVGGLVALR	0	3	_TRVVGGLVALR_	1	39.4286	34341.8
3.2.220222.52329	20230928_apagotto_AP14bis_FXII_all1ul_inj_F12fastasearchpluscontaminants	1	20230928_210230	230928_EC1_apagotto_AP14bis_XII_Mpro_1.raw	3	38073	NaN	0.018	2	0	0.565732	505599	2	True	True	791.901	ALYAQAR	0	2	_ALYAQAR_	9	22.1866	120411
3.2.220222.52329	20230928_apagotto_AP14bis_FXII_all1ul_inj_F12fastasearchpluscontaminants	1	20230928_210230	230928_EC1_apagotto_AP14bis_XII_Mpro_1.raw	3	38073	NaN	0.018	2	0	0.565732	505599	2	True	True	1104.27	SSIKEKTVGR	0	3	_SSIK[DimethLys0]EK[DimethLys0]TVGR_	4	14.538	385188
3.2.220222.52329	20230928_apagotto_AP14bis_FXII_all1ul_inj_F12fastasearchpluscontaminants	1	20230928_210230	230928_EC1_apagotto_AP14bis_XII_Mpro_1.raw	3	38073	NaN	0.031	1	0	0.33988	63521.7	1	True	True	1646.82	DVWGIEGPIDAAFTR	0	2	_DVWGIEGPIDAAFTR_	3	67.7079	63521.7
3.2.220222.52329	20230928_apagotto_AP14bis_FXII_all1ul_inj_F12fastasearchpluscontaminants	1	20230928_210230	230928_EC1_apagotto_AP14bis_XII_Mpro_1.raw	3	38073	NaN	0.085	8	0	0.80976	362031	6	True	True	1227.25	GGGGSFGAGGGFGSR	0	2	_GGGGSFGAGGGFGSR_	8	31.7755	63266.1
3.2.220222.52329	20230928_apagotto_AP14bis_FXII_all1ul_inj_F12fastasearchpluscontaminants	1	20230928_210230	230928_EC1_apagotto_AP14bis_XII_Mpro_1.raw	3	38073	NaN	0.085	8	0	0.80976	362031	6	False	False	1033.1	TLLEGEESR	0	2	_TLLEGEESR_	8	28.3342	43325
3.2.220222.52329	20230928_apagotto_AP14bis_FXII_all1ul_inj_F12fastasearchpluscontaminants	1	20230928_210230	230928_EC1_apagotto_AP14bis_XII_Mpro_1.raw	3	38073	NaN	0.085	8	0	0.80976	362031	6	True	True	874	SLVNLGGSK	0	2	_SLVNLGGSK_	7	34.6731	90827.5
3.2.220222.52329	20230928_apagotto_AP14bis_FXII_all1ul_inj_F12fastasearchpluscontaminants	1	20230928_210230	230928_EC1_apagotto_AP14bis_XII_Mpro_1.raw	3	38073	NaN	0.085	8	0	0.80976	362031	6	False	False	931.993	LLEGEESR	0	2	_LLEGEESR_	7	22.3441	60891
3.2.220222.52329	20230928_apagotto_AP14bis_FXII_all1ul_inj_F12fastasearchpluscontaminants	1	20230928_210230	230928_EC1_apagotto_AP14bis_XII_Mpro_1.raw	3	38073	NaN	0.085	8	0	0.80976	362031	6	False	False	818.834	LEGEESR	0	2	_LEGEESR_	6	14.3563	103722
3.2.220222.52329	20230928_apagotto_AP14bis_FXII_all1ul_inj_F12fastasearchpluscontaminants	1	20230928_210230	230928_EC1_apagotto_AP14bis_XII_Mpro_1.raw	3	38073	NaN	0.085	8	0	0.80976	362031	6	True	True	2237.3	SGGGGGRFSSCGGGGGSFGAGGGFGSR	0	3	_SGGGGGRFSSC[Carbamidomethyl (C)]GGGGGSFGAGGGFGSR_	4	32.9539	56088.9
3.2.220222.52329	20230928_apagotto_AP14bis_FXII_all1ul_inj_F12fastasearchpluscontaminants	1	20230928_210230	230928_EC1_apagotto_AP14bis_XII_Mpro_1.raw	3	38073	NaN	0.085	8	0	0.80976	362031	6	True	True	1179.29	YEELQITAGR	0	2	_YEELQITAGR_	1	37.9664	59015.3
3.2.220222.52329	20230928_apagotto_AP14bis_FXII_all1ul_inj_F12fastasearchpluscontaminants	1	20230928_210230	230928_EC1_apagotto_AP14bis_XII_Mpro_1.raw	3	38073	NaN	0.011	1	0	-0.887074	49788.2	1	True	True	1221.35	GHMLENHVER	0.00203666	3	_GHMLENHVER_	2	18.3336	49788.2
3.2.220222.52329	20230928_apagotto_AP14bis_FXII_all1ul_inj_F12fastasearchpluscontaminants	1	20230928_210230	230928_EC1_apagotto_AP14bis_XII_Mpro_1.raw	3	38073	NaN	0.303	13	0	0.791953	4249372	12	True	True	842.001	VATVSLPR	0	2	_VATVSLPR_	9	35.2732	126052
3.2.220222.52329	20230928_apagotto_AP14bis_FXII_all1ul_inj_F12fastasearchpluscontaminants	1	20230928_210230	230928_EC1_apagotto_AP14bis_XII_Mpro_1.raw	3	38073	NaN	0.303	13	0	0.791953	4249372	12	True	True	842.001	VATVSLPR	0	2	_[DimethNter0]VATVSLPR_	4	37.0445	1264853
3.2.220222.52329	20230928_apagotto_AP14bis_FXII_all1ul_inj_F12fastasearchpluscontaminants	1	20230928_210230	230928_EC1_apagotto_AP14bis_XII_Mpro_1.raw	3	38073	NaN	0.303	13	0	0.791953	4249372	12	True	True	2211.41	LGEHNIDVLEGNEQFINAAK	0	3	_LGEHNIDVLEGNEQFINAAK_	9	49.764	944059
3.2.220222.52329	20230928_apagotto_AP14bis_FXII_all1ul_inj_F12fastasearchpluscontaminants	1	20230928_210230	230928_EC1_apagotto_AP14bis_XII_Mpro_1.raw	3	38073	NaN	0.303	13	0	0.791953	4249372	12	True	True	2106.38	GSLINSQWVVSAAHCYKSR	0	3	_GSLINSQWVVSAAHC[Carbamidomethyl (C)]YK[DimethLys0]SR_	6	46.9342	983319
3.2.220222.52329	20230928_apagotto_AP14bis_FXII_all1ul_inj_F12fastasearchpluscontaminants	1	20230928_210230	230928_EC1_apagotto_AP14bis_XII_Mpro_1.raw	3	38073	NaN	0.303	13	0	0.791953	4249372	12	True	True	1045.16	LSSPATLNSR	0	2	_LSSPATLNSR_	9	28.1324	88774.6
3.2.220222.52329	20230928_apagotto_AP14bis_FXII_all1ul_inj_F12fastasearchpluscontaminants	1	20230928_210230	230928_EC1_apagotto_AP14bis_XII_Mpro_1.raw	3	38073	NaN	0.303	13	0	0.791953	4249372	12	True	True	1420.58	YVNWIQQTIAAN	0	2	_YVNWIQQTIAAN_	8	61.7276	842314
3.2.220222.52329	20230928_apagotto_AP14bis_FXII_all1ul_inj_F12fastasearchpluscontaminants	1	20230928_210230	230928_EC1_apagotto_AP14bis_XII_Mpro_1.raw	3	38073	NaN	0.303	13	0	0.791953	4249372	12	True	True	929.08	VATVSLPRS	0	2	_VATVSLPRS_	8	33.9331	76848.3
3.2.220222.52329	20230928_apagotto_AP14bis_FXII_all1ul_inj_F12fastasearchpluscontaminants	1	20230928_210230	230928_EC1_apagotto_AP14bis_XII_Mpro_1.raw	3	38073	NaN	0.043	7	0	0.613276	4120976	7	True	True	886.956	NEQVEIR	0	2	_NEQVEIR_	9	23.227	88117.5
3.2.220222.52329	20230928_apagotto_AP14bis_FXII_all1ul_inj_F12fastasearchpluscontaminants	1	20230928_210230	230928_EC1_apagotto_AP14bis_XII_Mpro_1.raw	3	38073	NaN	0.043	7	0	0.613276	4120976	7	True	True	1283.44	TITSDFIPSFR	0	2	_[DimethNter0]TITSDFIPSFR_	7	59.5664	574942
3.2.220222.52329	20230928_apagotto_AP14bis_FXII_all1ul_inj_F12fastasearchpluscontaminants	1	20230928_210230	230928_EC1_apagotto_AP14bis_XII_Mpro_1.raw	3	38073	NaN	0.043	7	0	0.613276	4120976	7	True	True	1857.11	LDKACEPGVDYVYKTR	0	3	_LDK[DimethLys0]AC[Carbamidomethyl (C)]EPGVDYVYK[DimethLys0]TR_	7	33.3711	228698
3.2.220222.52329	20230928_apagotto_AP14bis_FXII_all1ul_inj_F12fastasearchpluscontaminants	1	20230928_210230	230928_EC1_apagotto_AP14bis_XII_Mpro_1.raw	3	38073	NaN	0.043	7	0	0.613276	4120976	7	True	True	1689.81	GTPVAQMTEDAIDGER	0	2	_[DimethNter0]GTPVAQMTEDAIDGER_	3	43.656	3097822
3.2.220222.52329	20230928_apagotto_AP14bis_FXII_all1ul_inj_F12fastasearchpluscontaminants	1	20230928_210230	230928_EC1_apagotto_AP14bis_XII_Mpro_1.raw	3	38073	NaN	0.043	7	0	0.613276	4120976	7	True	True	2523.86	SGYLFIQTDKTIYTPGSTVLYR	0	3	_[DimethNter0]SGYLFIQTDK[DimethLys0]TIYTPGSTVLYR_	2	58.5717	131396
3.2.220222.52329	20230928_apagotto_AP14bis_FXII_all1ul_inj_F12fastasearchpluscontaminants	1	20230928_210230	230928_EC1_apagotto_AP14bis_XII_Mpro_1.raw	3	38073	NaN	0.026	3	0	0.692936	247832	3	True	True	1320.34	HGGGGGGFGGGGFGSR	0	3	_HGGGGGGFGGGGFGSR_	9	26.0356	203520
3.2.220222.52329	20230928_apagotto_AP14bis_FXII_all1ul_inj_F12fastasearchpluscontaminants	1	20230928_210230	230928_EC1_apagotto_AP14bis_XII_Mpro_1.raw	3	38073	NaN	0.026	3	0	0.692936	247832	3	True	True	1407.42	HGGGGGGFGGGGFGSRS	0	3	_HGGGGGGFGGGGFGSRS_	5	25.8379	44312
3.2.220222.52329	20230928_apagotto_AP14bis_FXII_all1ul_inj_F12fastasearchpluscontaminants	1	20230928_210230	230928_EC1_apagotto_AP14bis_XII_Mpro_1.raw	3	38073	NaN	0.012	1	0	0.672684	137956	1	False	False	806.869	LAADDFR	0	2	_LAADDFR_	8	31.0359	137956
3.2.220222.52329	20230928_apagotto_AP14bis_FXII_all1ul_inj_F12fastasearchpluscontaminants	1	20230928_210230	230928_EC1_apagotto_AP14bis_XII_Mpro_1.raw	3	38073	NaN	0.022	1	0	0.783619	73373.1	1	True	True	1176.35	LCQDLGPGAFR	0	2	_LC[Carbamidomethyl (C)]QDLGPGAFR_	5	41.2261	73373.1
3.2.220222.52329	20230928_apagotto_AP14bis_FXII_all1ul_inj_F12fastasearchpluscontaminants	1	20230928_210230	230928_EC1_apagotto_AP14bis_XII_Mpro_1.raw	3	38073	NaN	0.003	1	0	-0.625501	1591578	1	True	True	842.042	LQIDLLK	0	2	_LQIDLLK[DimethLys0]_	3	53.7126	1591578
3.2.220222.52329	20230928_apagotto_AP14bis_FXII_all1ul_inj_F12fastasearchpluscontaminants	1	20230928_210230	230928_EC1_apagotto_AP14bis_XII_Mpro_1.raw	3	38073	NaN	0.014	1	0	0.452872	73695.6	1	True	True	869.971	NFGYTLR	0	2	_NFGYTLR_	2	38.0033	73695.6
3.2.220222.52329	20230928_apagotto_AP14bis_FXII_all1ul_inj_F12fastasearchpluscontaminants	1	20230928_210230	230928_EC1_apagotto_AP14bis_XII_Mpro_1.raw	3	38073	NaN	0.5%;0.5%	3	0	0.633927	171507	3	True	False	983.047	QGSFQGGFR	0	2	_QGSFQGGFR_	7	29.9334	171507
3.2.220222.52329	20230928_apagotto_AP14bis_FXII_all1ul_inj_F12fastasearchpluscontaminants	1	20230928_210230	230928_EC1_apagotto_AP14bis_XII_Mpro_1.raw	3	38073	NaN	0.014	1	0	-0.2378	286029	1	True	True	843.974	SILENLR	0	2	_SILENLR_	8	41.0261	286029
3.2.220222.52329	20230928_apagotto_AP14bis_FXII_all1ul_inj_F12fastasearchpluscontaminants	1	20230928_210230	230928_EC1_apagotto_AP14bis_XII_Mpro_1.raw	3	38073	NaN	0.029	2	0	0.719444	588640	2	True	True	1475.54	SRSGGGGGGGLGSGGSIR	0	3	_SRSGGGGGGGLGSGGSIR_	9	20.4534	588640
3.2.220222.52329	20230928_apagotto_AP14bis_FXII_all1ul_inj_F12fastasearchpluscontaminants	1	20230928_210230	230928_EC1_apagotto_AP14bis_XII_Mpro_1.raw	3	38073	NaN	0.108	1	0	-0.591386	84041.3	1	True	True	1635.8	SSVTTVDTAVYYCAR	0.00203666	3	_SSVTTVDTAVYYC[Carbamidomethyl (C)]AR_	1	31.0861	84041.3
3.2.220222.52329	20230928_apagotto_AP14bis_FXII_all1ul_inj_F12fastasearchpluscontaminants	1	20230928_210230	230928_EC1_apagotto_AP14bis_XII_Mpro_1.raw	3	38073	NaN	0.05	3	0	0.486681	2403552	3	True	True	1363.58	TFGQGTKVEIKR	0	3	_TFGQGTK[DimethLys0]VEIK[DimethLys0]R_	9	25.7845	2403552
3.2.220222.52329	20230928_apagotto_AP14bis_FXII_all1ul_inj_F12fastasearchpluscontaminants	1	20230928_210230	230928_EC1_apagotto_AP14bis_XII_Mpro_1.raw	3	38073	NaN	0.035	1	0	0.384151	223780	1	True	True	1200.36	VSKELQAAQAR	0	3	_[DimethNter0]VSK[DimethLys0]ELQAAQAR_	8	21.57	223780
3.2.220222.52329	20230928_apagotto_AP14bis_FXII_all1ul_inj_F12fastasearchpluscontaminants	2	20230928_224346	230928_EC1_apagotto_AP14bis_XII_Mpro_2.raw	3	40806	NaN	0.376	33	0	0.956548	8424796	8	True	True	1467.73	RHPDYSVVLLLR	0	3	_RHPDYSVVLLLR_	9	48.4865	1633279
3.2.220222.52329	20230928_apagotto_AP14bis_FXII_all1ul_inj_F12fastasearchpluscontaminants	2	20230928_224346	230928_EC1_apagotto_AP14bis_XII_Mpro_2.raw	3	40806	NaN	0.376	33	0	0.956548	8424796	8	True	True	879.961	AEFAEVSK	0	2	_AEFAEVSK_	9	27.5055	3213162
3.2.220222.52329	20230928_apagotto_AP14bis_FXII_all1ul_inj_F12fastasearchpluscontaminants	2	20230928_224346	230928_EC1_apagotto_AP14bis_XII_Mpro_2.raw	3	40806	NaN	0.376	33	0	0.956548	8424796	8	True	True	1899.22	RHPYFYAPELLFFAK	0	3	_RHPYFYAPELLFFAK_	9	61.2683	655702
3.2.220222.52329	20230928_apagotto_AP14bis_FXII_all1ul_inj_F12fastasearchpluscontaminants	2	20230928_224346	230928_EC1_apagotto_AP14bis_XII_Mpro_2.raw	3	40806	NaN	0.376	33	0	0.956548	8424796	8	True	True	1149.3	LVNEVTEFAK	0	2	_LVNEVTEFAK_	9	41.4674	2504436
3.2.220222.52329	20230928_apagotto_AP14bis_FXII_all1ul_inj_F12fastasearchpluscontaminants	2	20230928_224346	230928_EC1_apagotto_AP14bis_XII_Mpro_2.raw	3	40806	NaN	0.376	33	0	0.956548	8424796	8	False	False	1055.24	KYLYEIAR	0	2	_KYLYEIAR_	9	34.4763	418217
3.2.220222.52329	20230928_apagotto_AP14bis_FXII_all1ul_inj_F12fastasearchpluscontaminants	2	20230928_224346	230928_EC1_apagotto_AP14bis_XII_Mpro_2.raw	3	40806	NaN	0.376	33	0	0.956548	8424796	8	False	False	788.935	LVTDLTK	0	2	_LVTDLTK_	9	31.2594	326724
3.2.220222.52329	20230928_apagotto_AP14bis_FXII_all1ul_inj_F12fastasearchpluscontaminants	2	20230928_224346	230928_EC1_apagotto_AP14bis_XII_Mpro_2.raw	3	40806	NaN	0.376	33	0	0.956548	8424796	8	True	True	1384.45	TCVADESAENCDK	0	2	_TC[Carbamidomethyl (C)]VADESAENC[Carbamidomethyl (C)]DK_	9	20.8203	109556
3.2.220222.52329	20230928_apagotto_AP14bis_FXII_all1ul_inj_F12fastasearchpluscontaminants	2	20230928_224346	230928_EC1_apagotto_AP14bis_XII_Mpro_2.raw	3	40806	NaN	0.376	33	0	0.956548	8424796	8	True	True	1257.39	AAFTECCQAADK	0	2	_AAFTEC[Carbamidomethyl (C)]C[Carbamidomethyl (C)]QAADK_	9	25.8605	67128.8
3.2.220222.52329	20230928_apagotto_AP14bis_FXII_all1ul_inj_F12fastasearchpluscontaminants	2	20230928_224346	230928_EC1_apagotto_AP14bis_XII_Mpro_2.raw	3	40806	NaN	0.376	33	0	0.956548	8424796	8	True	True	939.976	DDNPNLPR	0	2	_DDNPNLPR_	8	26.6301	1081792
3.2.220222.52329	20230928_apagotto_AP14bis_FXII_all1ul_inj_F12fastasearchpluscontaminants	2	20230928_224346	230928_EC1_apagotto_AP14bis_XII_Mpro_2.raw	3	40806	NaN	0.376	33	0	0.956548	8424796	8	True	True	1074.15	LDELRDEGK	0	3	_LDELRDEGK_	7	21.7226	404741
3.2.220222.52329	20230928_apagotto_AP14bis_FXII_all1ul_inj_F12fastasearchpluscontaminants	2	20230928_224346	230928_EC1_apagotto_AP14bis_XII_Mpro_2.raw	3	40806	NaN	0.376	33	0	0.956548	8424796	8	True	True	1074.15	LDELRDEGK	0	2	_LDELRDEGK_	6	21.6973	2520218
3.2.220222.52329	20230928_apagotto_AP14bis_FXII_all1ul_inj_F12fastasearchpluscontaminants	2	20230928_224346	230928_EC1_apagotto_AP14bis_XII_Mpro_2.raw	3	40806	NaN	0.376	33	0	0.956548	8424796	8	True	True	1017.14	SLHTLFGDK	0	2	_SLHTLFGDK_	8	36.3856	349703
3.2.220222.52329	20230928_apagotto_AP14bis_FXII_all1ul_inj_F12fastasearchpluscontaminants	2	20230928_224346	230928_EC1_apagotto_AP14bis_XII_Mpro_2.raw	3	40806	NaN	0.376	33	0	0.956548	8424796	8	True	True	2045.36	VFDEFKPLVEEPQNLIK	0	3	_VFDEFKPLVEEPQNLIK_	8	59.9843	224163
3.2.220222.52329	20230928_apagotto_AP14bis_FXII_all1ul_inj_F12fastasearchpluscontaminants	2	20230928_224346	230928_EC1_apagotto_AP14bis_XII_Mpro_2.raw	3	40806	NaN	0.376	33	0	0.956548	8424796	8	True	True	950.996	DLGEENFK	0	2	_DLGEENFK_	8	31.9789	103401
3.2.220222.52329	20230928_apagotto_AP14bis_FXII_all1ul_inj_F12fastasearchpluscontaminants	2	20230928_224346	230928_EC1_apagotto_AP14bis_XII_Mpro_2.raw	3	40806	NaN	0.376	33	0	0.956548	8424796	8	True	True	1019.21	AFKAWAVAR	0	2	_AFK[DimethLys0]AWAVAR_	7	35.1019	1219947
3.2.220222.52329	20230928_apagotto_AP14bis_FXII_all1ul_inj_F12fastasearchpluscontaminants	2	20230928_224346	230928_EC1_apagotto_AP14bis_XII_Mpro_2.raw	3	40806	NaN	0.376	33	0	0.956548	8424796	8	True	True	1128.37	KQTALVELVK	0	2	_KQTALVELVK_	7	37.3794	688477
3.2.220222.52329	20230928_apagotto_AP14bis_FXII_all1ul_inj_F12fastasearchpluscontaminants	2	20230928_224346	230928_EC1_apagotto_AP14bis_XII_Mpro_2.raw	3	40806	NaN	0.376	33	0	0.956548	8424796	8	True	True	875.034	LSQRFPK	0	2	_LSQRFPK_	7	22.1806	441270
3.2.220222.52329	20230928_apagotto_AP14bis_FXII_all1ul_inj_F12fastasearchpluscontaminants	2	20230928_224346	230928_EC1_apagotto_AP14bis_XII_Mpro_2.raw	3	40806	NaN	0.376	33	0	0.956548	8424796	8	True	True	1559.73	PADLPSLAADFVESK	0	2	_PADLPSLAADFVESK_	6	62.0126	259011
3.2.220222.52329	20230928_apagotto_AP14bis_FXII_all1ul_inj_F12fastasearchpluscontaminants	2	20230928_224346	230928_EC1_apagotto_AP14bis_XII_Mpro_2.raw	3	40806	NaN	0.376	33	0	0.956548	8424796	8	True	True	2055.41	RHPYFYAPELLFFAKR	0	4	_RHPYFYAPELLFFAK[DimethLys0]R_	6	57.0109	226727
3.2.220222.52329	20230928_apagotto_AP14bis_FXII_all1ul_inj_F12fastasearchpluscontaminants	2	20230928_224346	230928_EC1_apagotto_AP14bis_XII_Mpro_2.raw	3	40806	NaN	0.376	33	0	0.956548	8424796	8	True	True	714.917	AACLLPK	0	2	_AAC[Carbamidomethyl (C)]LLPK_	7	33.0577	71085.8
3.2.220222.52329	20230928_apagotto_AP14bis_FXII_all1ul_inj_F12fastasearchpluscontaminants	2	20230928_224346	230928_EC1_apagotto_AP14bis_XII_Mpro_2.raw	3	40806	NaN	0.376	33	0	0.956548	8424796	8	True	True	1379.64	LKCASLQKFGER	0	3	_LK[DimethLys0]C[Carbamidomethyl (C)]ASLQK[DimethLys0]FGER_	4	27.8373	2975027
3.2.220222.52329	20230928_apagotto_AP14bis_FXII_all1ul_inj_F12fastasearchpluscontaminants	2	20230928_224346	230928_EC1_apagotto_AP14bis_XII_Mpro_2.raw	3	40806	NaN	0.376	33	0	0.956548	8424796	8	True	True	1379.64	LKCASLQKFGER	0	4	_LK[DimethLys0]C[Carbamidomethyl (C)]ASLQK[DimethLys0]FGER_	4	27.8823	287708
3.2.220222.52329	20230928_apagotto_AP14bis_FXII_all1ul_inj_F12fastasearchpluscontaminants	2	20230928_224346	230928_EC1_apagotto_AP14bis_XII_Mpro_2.raw	3	40806	NaN	0.376	33	0	0.956548	8424796	8	True	True	2203.4	EFNAETFTFHADICTLSEK	0	3	_EFNAETFTFHADIC[Carbamidomethyl (C)]TLSEK_	6	55.9349	58278.1
3.2.220222.52329	20230928_apagotto_AP14bis_FXII_all1ul_inj_F12fastasearchpluscontaminants	2	20230928_224346	230928_EC1_apagotto_AP14bis_XII_Mpro_2.raw	3	40806	NaN	0.376	33	0	0.956548	8424796	8	True	True	1657.82	QEPERNECFLQHK	0	3	_QEPERNEC[Carbamidomethyl (C)]FLQHK_	3	23.6018	197834
3.2.220222.52329	20230928_apagotto_AP14bis_FXII_all1ul_inj_F12fastasearchpluscontaminants	2	20230928_224346	230928_EC1_apagotto_AP14bis_XII_Mpro_2.raw	3	40806	P00748	0.753	460	0	0.996446	1178791000	15	True	True	747.863	LASQACR	0	2	_LASQAC[Carbamidomethyl (C)]R_	9	19.3578	282348600
3.2.220222.52329	20230928_apagotto_AP14bis_FXII_all1ul_inj_F12fastasearchpluscontaminants	2	20230928_224346	230928_EC1_apagotto_AP14bis_XII_Mpro_2.raw	3	40806	P00748	0.753	460	0	0.996446	1178791000	15	True	True	844.918	TEQAAVAR	0	2	_TEQAAVAR_	9	19.7052	271543800
3.2.220222.52329	20230928_apagotto_AP14bis_FXII_all1ul_inj_F12fastasearchpluscontaminants	2	20230928_224346	230928_EC1_apagotto_AP14bis_XII_Mpro_2.raw	3	40806	P00748	0.753	460	0	0.996446	1178791000	15	True	True	992.141	GLSYRGLAR	0	2	_GLSYRGLAR_	9	28.9343	306343700
3.2.220222.52329	20230928_apagotto_AP14bis_FXII_all1ul_inj_F12fastasearchpluscontaminants	2	20230928_224346	230928_EC1_apagotto_AP14bis_XII_Mpro_2.raw	3	40806	P00748	0.753	460	0	0.996446	1178791000	15	True	True	2096.37	LHEAFSPVSYQHDLALLR	0	3	_LHEAFSPVSYQHDLALLR_	9	50.9164	95342800
3.2.220222.52329	20230928_apagotto_AP14bis_FXII_all1ul_inj_F12fastasearchpluscontaminants	2	20230928_224346	230928_EC1_apagotto_AP14bis_XII_Mpro_2.raw	3	40806	P00748	0.753	460	0	0.996446	1178791000	15	True	True	2096.37	LHEAFSPVSYQHDLALLR	0	4	_LHEAFSPVSYQHDLALLR_	9	50.9164	6048600
3.2.220222.52329	20230928_apagotto_AP14bis_FXII_all1ul_inj_F12fastasearchpluscontaminants	2	20230928_224346	230928_EC1_apagotto_AP14bis_XII_Mpro_2.raw	3	40806	P00748	0.753	460	0	0.996446	1178791000	15	True	True	2096.37	LHEAFSPVSYQHDLALLR	0	2	_LHEAFSPVSYQHDLALLR_	9	50.9164	4767277
3.2.220222.52329	20230928_apagotto_AP14bis_FXII_all1ul_inj_F12fastasearchpluscontaminants	2	20230928_224346	230928_EC1_apagotto_AP14bis_XII_Mpro_2.raw	3	40806	P00748	0.753	460	0	0.996446	1178791000	15	True	True	2096.37	LHEAFSPVSYQHDLALLR	0	4	_[DimethNter0]LHEAFSPVSYQHDLALLR_	9	51.4553	550018
3.2.220222.52329	20230928_apagotto_AP14bis_FXII_all1ul_inj_F12fastasearchpluscontaminants	2	20230928_224346	230928_EC1_apagotto_AP14bis_XII_Mpro_2.raw	3	40806	P00748	0.753	460	0	0.996446	1178791000	15	True	True	2096.37	LHEAFSPVSYQHDLALLR	0	3	_[DimethNter0]LHEAFSPVSYQHDLALLR_	7	51.4053	2083077
3.2.220222.52329	20230928_apagotto_AP14bis_FXII_all1ul_inj_F12fastasearchpluscontaminants	2	20230928_224346	230928_EC1_apagotto_AP14bis_XII_Mpro_2.raw	3	40806	P00748	0.753	460	0	0.996446	1178791000	15	True	True	2502.81	SYRLHEAFSPVSYQHDLALLR	0	4	_SYRLHEAFSPVSYQHDLALLR_	9	49.4768	44728150
3.2.220222.52329	20230928_apagotto_AP14bis_FXII_all1ul_inj_F12fastasearchpluscontaminants	2	20230928_224346	230928_EC1_apagotto_AP14bis_XII_Mpro_2.raw	3	40806	P00748	0.753	460	0	0.996446	1178791000	15	True	True	2502.81	SYRLHEAFSPVSYQHDLALLR	0	4	_[DimethNter0]SYRLHEAFSPVSYQHDLALLR_	9	49.9226	997781
3.2.220222.52329	20230928_apagotto_AP14bis_FXII_all1ul_inj_F12fastasearchpluscontaminants	2	20230928_224346	230928_EC1_apagotto_AP14bis_XII_Mpro_2.raw	3	40806	P00748	0.753	460	0	0.996446	1178791000	15	True	True	2502.81	SYRLHEAFSPVSYQHDLALLR	0	3	_SYRLHEAFSPVSYQHDLALLR_	9	49.5257	166670600
3.2.220222.52329	20230928_apagotto_AP14bis_FXII_all1ul_inj_F12fastasearchpluscontaminants	2	20230928_224346	230928_EC1_apagotto_AP14bis_XII_Mpro_2.raw	3	40806	P00748	0.753	460	0	0.996446	1178791000	15	True	True	2502.81	SYRLHEAFSPVSYQHDLALLR	0	2	_SYRLHEAFSPVSYQHDLALLR_	7	49.5257	3209614
3.2.220222.52329	20230928_apagotto_AP14bis_FXII_all1ul_inj_F12fastasearchpluscontaminants	2	20230928_224346	230928_EC1_apagotto_AP14bis_XII_Mpro_2.raw	3	40806	P00748	0.753	460	0	0.996446	1178791000	15	True	True	2502.81	SYRLHEAFSPVSYQHDLALLR	0	5	_SYRLHEAFSPVSYQHDLALLR_	4	49.5748	0
3.2.220222.52329	20230928_apagotto_AP14bis_FXII_all1ul_inj_F12fastasearchpluscontaminants	2	20230928_224346	230928_EC1_apagotto_AP14bis_XII_Mpro_2.raw	3	40806	P00748	0.753	460	0	0.996446	1178791000	15	True	True	2266.54	FFHKNEIWYRTEQAAVAR	0	3	_[DimethNter0]FFHK[DimethLys0]NEIWYRTEQAAVAR_	9	37.7757	7018679
3.2.220222.52329	20230928_apagotto_AP14bis_FXII_all1ul_inj_F12fastasearchpluscontaminants	2	20230928_224346	230928_EC1_apagotto_AP14bis_XII_Mpro_2.raw	3	40806	P00748	0.753	460	0	0.996446	1178791000	15	True	True	2266.54	FFHKNEIWYRTEQAAVAR	0	4	_[DimethNter0]FFHK[DimethLys0]NEIWYRTEQAAVAR_	9	37.9242	17368950
3.2.220222.52329	20230928_apagotto_AP14bis_FXII_all1ul_inj_F12fastasearchpluscontaminants	2	20230928_224346	230928_EC1_apagotto_AP14bis_XII_Mpro_2.raw	3	40806	P00748	0.753	460	0	0.996446	1178791000	15	True	True	2266.54	FFHKNEIWYRTEQAAVAR	0	3	_FFHK[DimethLys0]NEIWYRTEQAAVAR_	9	41.3685	218076
3.2.220222.52329	20230928_apagotto_AP14bis_FXII_all1ul_inj_F12fastasearchpluscontaminants	2	20230928_224346	230928_EC1_apagotto_AP14bis_XII_Mpro_2.raw	3	40806	P00748	0.753	460	0	0.996446	1178791000	15	True	True	2266.54	FFHKNEIWYRTEQAAVAR	0	4	_FFHK[DimethLys0]NEIWYRTEQAAVAR_	9	40.1066	356332
3.2.220222.52329	20230928_apagotto_AP14bis_FXII_all1ul_inj_F12fastasearchpluscontaminants	2	20230928_224346	230928_EC1_apagotto_AP14bis_XII_Mpro_2.raw	3	40806	P00748	0.753	460	0	0.996446	1178791000	15	True	True	2266.54	FFHKNEIWYRTEQAAVAR	0	2	_FFHK[DimethLys0]NEIWYRTEQAAVAR_	8	37.7262	51371740
3.2.220222.52329	20230928_apagotto_AP14bis_FXII_all1ul_inj_F12fastasearchpluscontaminants	2	20230928_224346	230928_EC1_apagotto_AP14bis_XII_Mpro_2.raw	3	40806	P00748	0.753	460	0	0.996446	1178791000	15	True	True	2266.54	FFHKNEIWYRTEQAAVAR	0	5	_FFHK[DimethLys0]NEIWYRTEQAAVAR_	6	37.8252	71012
3.2.220222.52329	20230928_apagotto_AP14bis_FXII_all1ul_inj_F12fastasearchpluscontaminants	2	20230928_224346	230928_EC1_apagotto_AP14bis_XII_Mpro_2.raw	3	40806	P00748	0.753	460	0	0.996446	1178791000	15	True	True	883.097	VVGGLVALR	0	2	_VVGGLVALR_	9	43.7452	49692320
3.2.220222.52329	20230928_apagotto_AP14bis_FXII_all1ul_inj_F12fastasearchpluscontaminants	2	20230928_224346	230928_EC1_apagotto_AP14bis_XII_Mpro_2.raw	3	40806	P00748	0.753	460	0	0.996446	1178791000	15	True	True	883.097	VVGGLVALR	0	2	_[DimethNter0]VVGGLVALR_	3	44.8374	2008018
3.2.220222.52329	20230928_apagotto_AP14bis_FXII_all1ul_inj_F12fastasearchpluscontaminants	2	20230928_224346	230928_EC1_apagotto_AP14bis_XII_Mpro_2.raw	3	40806	P00748	0.753	460	0	0.996446	1178791000	15	True	True	1683.92	LASQACRTNPCLHGGR	0	3	_LASQAC[Carbamidomethyl (C)]RTNPC[Carbamidomethyl (C)]LHGGR_	9	20.8203	493041
3.2.220222.52329	20230928_apagotto_AP14bis_FXII_all1ul_inj_F12fastasearchpluscontaminants	2	20230928_224346	230928_EC1_apagotto_AP14bis_XII_Mpro_2.raw	3	40806	P00748	0.753	460	0	0.996446	1178791000	15	True	True	1683.92	LASQACRTNPCLHGGR	0	4	_LASQAC[Carbamidomethyl (C)]RTNPC[Carbamidomethyl (C)]LHGGR_	9	20.5944	141090
3.2.220222.52329	20230928_apagotto_AP14bis_FXII_all1ul_inj_F12fastasearchpluscontaminants	2	20230928_224346	230928_EC1_apagotto_AP14bis_XII_Mpro_2.raw	3	40806	P00748	0.753	460	0	0.996446	1178791000	15	True	True	1683.92	LASQACRTNPCLHGGR	0	4	_[DimethNter0]LASQAC[Carbamidomethyl (C)]RTNPC[Carbamidomethyl (C)]LHGGR_	7	20.919	7847602
3.2.220222.52329	20230928_apagotto_AP14bis_FXII_all1ul_inj_F12fastasearchpluscontaminants	2	20230928_224346	230928_EC1_apagotto_AP14bis_XII_Mpro_2.raw	3	40806	P00748	0.753	460	0	0.996446	1178791000	15	True	True	1683.92	LASQACRTNPCLHGGR	0	2	_LASQAC[Carbamidomethyl (C)]RTNPC[Carbamidomethyl (C)]LHGGR_	4	20.6833	42205980
3.2.220222.52329	20230928_apagotto_AP14bis_FXII_all1ul_inj_F12fastasearchpluscontaminants	2	20230928_224346	230928_EC1_apagotto_AP14bis_XII_Mpro_2.raw	3	40806	P00748	0.753	460	0	0.996446	1178791000	15	True	True	1683.92	LASQACRTNPCLHGGR	0	3	_[DimethNter0]LASQAC[Carbamidomethyl (C)]RTNPC[Carbamidomethyl (C)]LHGGR_	4	20.9682	542205
3.2.220222.52329	20230928_apagotto_AP14bis_FXII_all1ul_inj_F12fastasearchpluscontaminants	2	20230928_224346	230928_EC1_apagotto_AP14bis_XII_Mpro_2.raw	3	40806	P00748	0.753	460	0	0.996446	1178791000	15	True	True	2075.38	CQCKGPDAHCQRLASQACR	0	5	_C[Carbamidomethyl (C)]QC[Carbamidomethyl (C)]K[DimethLys0]GPDAHC[Carbamidomethyl (C)]QRLASQAC[Carbamidomethyl (C)]R_	9	20.2018	14133370
3.2.220222.52329	20230928_apagotto_AP14bis_FXII_all1ul_inj_F12fastasearchpluscontaminants	2	20230928_224346	230928_EC1_apagotto_AP14bis_XII_Mpro_2.raw	3	40806	P00748	0.753	460	0	0.996446	1178791000	15	True	True	2075.38	CQCKGPDAHCQRLASQACR	0	5	_[DimethNter0]C[Carbamidomethyl (C)]QC[Carbamidomethyl (C)]K[DimethLys0]GPDAHC[Carbamidomethyl (C)]QRLASQAC[Carbamidomethyl (C)]R_	7	20.3291	321027
3.2.220222.52329	20230928_apagotto_AP14bis_FXII_all1ul_inj_F12fastasearchpluscontaminants	2	20230928_224346	230928_EC1_apagotto_AP14bis_XII_Mpro_2.raw	3	40806	P00748	0.753	460	0	0.996446	1178791000	15	True	True	2075.38	CQCKGPDAHCQRLASQACR	0	4	_C[Carbamidomethyl (C)]QC[Carbamidomethyl (C)]K[DimethLys0]GPDAHC[Carbamidomethyl (C)]QRLASQAC[Carbamidomethyl (C)]R_	7	20.4625	127061
3.2.220222.52329	20230928_apagotto_AP14bis_FXII_all1ul_inj_F12fastasearchpluscontaminants	2	20230928_224346	230928_EC1_apagotto_AP14bis_XII_Mpro_2.raw	3	40806	P00748	0.753	460	0	0.996446	1178791000	15	True	True	2075.38	CQCKGPDAHCQRLASQACR	0	3	_C[Carbamidomethyl (C)]QC[Carbamidomethyl (C)]K[DimethLys0]GPDAHC[Carbamidomethyl (C)]QRLASQAC[Carbamidomethyl (C)]R_	5	20.2018	8142384
3.2.220222.52329	20230928_apagotto_AP14bis_FXII_all1ul_inj_F12fastasearchpluscontaminants	2	20230928_224346	230928_EC1_apagotto_AP14bis_XII_Mpro_2.raw	3	40806	P00748	0.753	460	0	0.996446	1178791000	15	True	True	927.02	EQPPSLTR	0	2	_EQPPSLTR_	9	26.5811	22470010
3.2.220222.52329	20230928_apagotto_AP14bis_FXII_all1ul_inj_F12fastasearchpluscontaminants	2	20230928_224346	230928_EC1_apagotto_AP14bis_XII_Mpro_2.raw	3	40806	P00748	0.753	460	0	0.996446	1178791000	15	True	True	927.02	EQPPSLTR	0	2	_[DimethNter0]EQPPSLTR_	9	27.6458	787250
3.2.220222.52329	20230928_apagotto_AP14bis_FXII_all1ul_inj_F12fastasearchpluscontaminants	2	20230928_224346	230928_EC1_apagotto_AP14bis_XII_Mpro_2.raw	3	40806	P00748	0.753	460	0	0.996446	1178791000	15	True	True	2130.36	NPDNDIRPWCFVLNRDR	0	4	_NPDNDIRPWC[Carbamidomethyl (C)]FVLNRDR_	9	50.9662	3592147
3.2.220222.52329	20230928_apagotto_AP14bis_FXII_all1ul_inj_F12fastasearchpluscontaminants	2	20230928_224346	230928_EC1_apagotto_AP14bis_XII_Mpro_2.raw	3	40806	P00748	0.753	460	0	0.996446	1178791000	15	True	True	2130.36	NPDNDIRPWCFVLNRDR	0	3	_NPDNDIRPWC[Carbamidomethyl (C)]FVLNRDR_	8	50.9662	9338559
3.2.220222.52329	20230928_apagotto_AP14bis_FXII_all1ul_inj_F12fastasearchpluscontaminants	2	20230928_224346	230928_EC1_apagotto_AP14bis_XII_Mpro_2.raw	3	40806	P00748	0.753	460	0	0.996446	1178791000	15	True	True	1819.06	RLTLQGIISWGSGCGDR	0	3	_RLTLQGIISWGSGC[Carbamidomethyl (C)]GDR_	9	57.6576	8000655
3.2.220222.52329	20230928_apagotto_AP14bis_FXII_all1ul_inj_F12fastasearchpluscontaminants	2	20230928_224346	230928_EC1_apagotto_AP14bis_XII_Mpro_2.raw	3	40806	P00748	0.753	460	0	0.996446	1178791000	15	True	True	1819.06	RLTLQGIISWGSGCGDR	0	2	_RLTLQGIISWGSGC[Carbamidomethyl (C)]GDR_	6	57.7074	4159244
3.2.220222.52329	20230928_apagotto_AP14bis_FXII_all1ul_inj_F12fastasearchpluscontaminants	2	20230928_224346	230928_EC1_apagotto_AP14bis_XII_Mpro_2.raw	3	40806	P00748	0.753	460	0	0.996446	1178791000	15	True	True	1343.53	HSCEPCQTLAVR	0	2	_HSC[Carbamidomethyl (C)]EPC[Carbamidomethyl (C)]QTLAVR_	8	27.3162	9845416
3.2.220222.52329	20230928_apagotto_AP14bis_FXII_all1ul_inj_F12fastasearchpluscontaminants	2	20230928_224346	230928_EC1_apagotto_AP14bis_XII_Mpro_2.raw	3	40806	P00748	0.753	460	0	0.996446	1178791000	15	True	True	1343.53	HSCEPCQTLAVR	0	3	_HSC[Carbamidomethyl (C)]EPC[Carbamidomethyl (C)]QTLAVR_	8	27.3654	243293
3.2.220222.52329	20230928_apagotto_AP14bis_FXII_all1ul_inj_F12fastasearchpluscontaminants	2	20230928_224346	230928_EC1_apagotto_AP14bis_XII_Mpro_2.raw	3	40806	P00748	0.753	460	0	0.996446	1178791000	15	True	True	1343.53	HSCEPCQTLAVR	0	3	_[DimethNter0]HSC[Carbamidomethyl (C)]EPC[Carbamidomethyl (C)]QTLAVR_	7	27.5055	215098
3.2.220222.52329	20230928_apagotto_AP14bis_FXII_all1ul_inj_F12fastasearchpluscontaminants	2	20230928_224346	230928_EC1_apagotto_AP14bis_XII_Mpro_2.raw	3	40806	P00748	0.753	460	0	0.996446	1178791000	15	True	True	1343.53	HSCEPCQTLAVR	0	2	_[DimethNter0]HSC[Carbamidomethyl (C)]EPC[Carbamidomethyl (C)]QTLAVR_	3	27.4579	1384696
3.2.220222.52329	20230928_apagotto_AP14bis_FXII_all1ul_inj_F12fastasearchpluscontaminants	2	20230928_224346	230928_EC1_apagotto_AP14bis_XII_Mpro_2.raw	3	40806	P00748	0.753	460	0	0.996446	1178791000	15	True	True	1878.11	TNPCLHGGRCLEVEGHR	0	4	_TNPC[Carbamidomethyl (C)]LHGGRC[Carbamidomethyl (C)]LEVEGHR_	9	22.8025	6134863
3.2.220222.52329	20230928_apagotto_AP14bis_FXII_all1ul_inj_F12fastasearchpluscontaminants	2	20230928_224346	230928_EC1_apagotto_AP14bis_XII_Mpro_2.raw	3	40806	P00748	0.753	460	0	0.996446	1178791000	15	True	True	1878.11	TNPCLHGGRCLEVEGHR	0	3	_TNPC[Carbamidomethyl (C)]LHGGRC[Carbamidomethyl (C)]LEVEGHR_	8	22.6565	9244417
3.2.220222.52329	20230928_apagotto_AP14bis_FXII_all1ul_inj_F12fastasearchpluscontaminants	2	20230928_224346	230928_EC1_apagotto_AP14bis_XII_Mpro_2.raw	3	40806	P00748	0.753	460	0	0.996446	1178791000	15	True	True	1457.64	NHSCEPCQTLAVR	0	3	_NHSC[Carbamidomethyl (C)]EPC[Carbamidomethyl (C)]QTLAVR_	9	27.3162	8619159
3.2.220222.52329	20230928_apagotto_AP14bis_FXII_all1ul_inj_F12fastasearchpluscontaminants	2	20230928_224346	230928_EC1_apagotto_AP14bis_XII_Mpro_2.raw	3	40806	P00748	0.753	460	0	0.996446	1178791000	15	True	True	1613.83	RNHSCEPCQTLAVR	0	3	_RNHSC[Carbamidomethyl (C)]EPC[Carbamidomethyl (C)]QTLAVR_	9	22.8525	8024119
3.2.220222.52329	20230928_apagotto_AP14bis_FXII_all1ul_inj_F12fastasearchpluscontaminants	2	20230928_224346	230928_EC1_apagotto_AP14bis_XII_Mpro_2.raw	3	40806	P00748	0.753	460	0	0.996446	1178791000	15	True	True	1613.83	RNHSCEPCQTLAVR	0	4	_RNHSC[Carbamidomethyl (C)]EPC[Carbamidomethyl (C)]QTLAVR_	9	22.8525	4182891
3.2.220222.52329	20230928_apagotto_AP14bis_FXII_all1ul_inj_F12fastasearchpluscontaminants	2	20230928_224346	230928_EC1_apagotto_AP14bis_XII_Mpro_2.raw	3	40806	P00748	0.753	460	0	0.996446	1178791000	15	True	True	1288.46	EAQVPFLSLER	0	2	_[DimethNter0]EAQVPFLSLER_	8	57.5089	7871020
3.2.220222.52329	20230928_apagotto_AP14bis_FXII_all1ul_inj_F12fastasearchpluscontaminants	2	20230928_224346	230928_EC1_apagotto_AP14bis_XII_Mpro_2.raw	3	40806	P00748	0.753	460	0	0.996446	1178791000	15	True	True	1288.46	EAQVPFLSLER	0	2	_EAQVPFLSLER_	8	56.8634	128592
3.2.220222.52329	20230928_apagotto_AP14bis_FXII_all1ul_inj_F12fastasearchpluscontaminants	2	20230928_224346	230928_EC1_apagotto_AP14bis_XII_Mpro_2.raw	3	40806	P00748	0.753	460	0	0.996446	1178791000	15	True	True	4422.87	CSAPDVHGSSILPGMLCAGFLEGGTDACQGDSGGPLVCEDQAAER	0	4	_C[Carbamidomethyl (C)]SAPDVHGSSILPGM[Oxidation (M)]LC[Carbamidomethyl (C)]AGFLEGGTDAC[Carbamidomethyl (C)]QGDSGGPLVC[Carbamidomethyl (C)]EDQAAER_	9	58.9919	541643
3.2.220222.52329	20230928_apagotto_AP14bis_FXII_all1ul_inj_F12fastasearchpluscontaminants	2	20230928_224346	230928_EC1_apagotto_AP14bis_XII_Mpro_2.raw	3	40806	P00748	0.753	460	0	0.996446	1178791000	15	True	True	4422.87	CSAPDVHGSSILPGMLCAGFLEGGTDACQGDSGGPLVCEDQAAER	0	4	_C[Carbamidomethyl (C)]SAPDVHGSSILPGMLC[Carbamidomethyl (C)]AGFLEGGTDAC[Carbamidomethyl (C)]QGDSGGPLVC[Carbamidomethyl (C)]EDQAAER_	9	63.7992	2721428
3.2.220222.52329	20230928_apagotto_AP14bis_FXII_all1ul_inj_F12fastasearchpluscontaminants	2	20230928_224346	230928_EC1_apagotto_AP14bis_XII_Mpro_2.raw	3	40806	P00748	0.753	460	0	0.996446	1178791000	15	True	True	4422.87	CSAPDVHGSSILPGMLCAGFLEGGTDACQGDSGGPLVCEDQAAER	0	5	_C[Carbamidomethyl (C)]SAPDVHGSSILPGMLC[Carbamidomethyl (C)]AGFLEGGTDAC[Carbamidomethyl (C)]QGDSGGPLVC[Carbamidomethyl (C)]EDQAAER_	4	63.8977	49383
3.2.220222.52329	20230928_apagotto_AP14bis_FXII_all1ul_inj_F12fastasearchpluscontaminants	2	20230928_224346	230928_EC1_apagotto_AP14bis_XII_Mpro_2.raw	3	40806	P00748	0.753	460	0	0.996446	1178791000	15	True	True	4422.87	CSAPDVHGSSILPGMLCAGFLEGGTDACQGDSGGPLVCEDQAAER	0	4	_[DimethNter0]C[Carbamidomethyl (C)]SAPDVHGSSILPGMLC[Carbamidomethyl (C)]AGFLEGGTDAC[Carbamidomethyl (C)]QGDSGGPLVC[Carbamidomethyl (C)]EDQAAER_	2	63.7992	3028841
3.2.220222.52329	20230928_apagotto_AP14bis_FXII_all1ul_inj_F12fastasearchpluscontaminants	2	20230928_224346	230928_EC1_apagotto_AP14bis_XII_Mpro_2.raw	3	40806	P00748	0.753	460	0	0.996446	1178791000	15	True	True	2989.35	YKAEEHTVVLTVTGEPCHFPFQYHR	0	4	_[DimethNter0]YK[DimethLys0]AEEHTVVLTVTGEPC[Carbamidomethyl (C)]HFPFQYHR_	9	44.7883	4050883
3.2.220222.52329	20230928_apagotto_AP14bis_FXII_all1ul_inj_F12fastasearchpluscontaminants	2	20230928_224346	230928_EC1_apagotto_AP14bis_XII_Mpro_2.raw	3	40806	P00748	0.753	460	0	0.996446	1178791000	15	True	True	2989.35	YKAEEHTVVLTVTGEPCHFPFQYHR	0	5	_[DimethNter0]YK[DimethLys0]AEEHTVVLTVTGEPC[Carbamidomethyl (C)]HFPFQYHR_	9	44.8374	2395380
3.2.220222.52329	20230928_apagotto_AP14bis_FXII_all1ul_inj_F12fastasearchpluscontaminants	2	20230928_224346	230928_EC1_apagotto_AP14bis_XII_Mpro_2.raw	3	40806	P00748	0.753	460	0	0.996446	1178791000	15	True	True	958.039	NWGLGGHAF	0	2	_NWGLGGHAF_	9	48.8329	2717979
3.2.220222.52329	20230928_apagotto_AP14bis_FXII_all1ul_inj_F12fastasearchpluscontaminants	2	20230928_224346	230928_EC1_apagotto_AP14bis_XII_Mpro_2.raw	3	40806	P00748	0.753	460	0	0.996446	1178791000	15	True	True	1320.47	DGRGLSYRGLAR	0	3	_DGRGLSYRGLAR_	9	27.8373	4566388
3.2.220222.52329	20230928_apagotto_AP14bis_FXII_all1ul_inj_F12fastasearchpluscontaminants	2	20230928_224346	230928_EC1_apagotto_AP14bis_XII_Mpro_2.raw	3	40806	P00748	0.753	460	0	0.996446	1178791000	15	True	True	1345.53	CQCKGPDAHCQR	0	4	_C[Carbamidomethyl (C)]QC[Carbamidomethyl (C)]K[DimethLys0]GPDAHC[Carbamidomethyl (C)]QR_	9	18.8826	317462
3.2.220222.52329	20230928_apagotto_AP14bis_FXII_all1ul_inj_F12fastasearchpluscontaminants	2	20230928_224346	230928_EC1_apagotto_AP14bis_XII_Mpro_2.raw	3	40806	P00748	0.753	460	0	0.996446	1178791000	15	True	True	1345.53	CQCKGPDAHCQR	0	3	_C[Carbamidomethyl (C)]QC[Carbamidomethyl (C)]K[DimethLys0]GPDAHC[Carbamidomethyl (C)]QR_	9	18.8597	218867
3.2.220222.52329	20230928_apagotto_AP14bis_FXII_all1ul_inj_F12fastasearchpluscontaminants	2	20230928_224346	230928_EC1_apagotto_AP14bis_XII_Mpro_2.raw	3	40806	P00748	0.753	460	0	0.996446	1178791000	15	True	True	1345.53	CQCKGPDAHCQR	0	4	_[DimethNter0]C[Carbamidomethyl (C)]QC[Carbamidomethyl (C)]K[DimethLys0]GPDAHC[Carbamidomethyl (C)]QR_	6	19.0577	309627
3.2.220222.52329	20230928_apagotto_AP14bis_FXII_all1ul_inj_F12fastasearchpluscontaminants	2	20230928_224346	230928_EC1_apagotto_AP14bis_XII_Mpro_2.raw	3	40806	P00748	0.753	460	0	0.996446	1178791000	15	True	True	1345.53	CQCKGPDAHCQR	0	2	_C[Carbamidomethyl (C)]QC[Carbamidomethyl (C)]K[DimethLys0]GPDAHC[Carbamidomethyl (C)]QR_	5	18.9233	4022825
3.2.220222.52329	20230928_apagotto_AP14bis_FXII_all1ul_inj_F12fastasearchpluscontaminants	2	20230928_224346	230928_EC1_apagotto_AP14bis_XII_Mpro_2.raw	3	40806	P00748	0.753	460	0	0.996446	1178791000	15	True	True	1689.95	DIRPWCFVLNRDR	0	3	_DIRPWC[Carbamidomethyl (C)]FVLNRDR_	8	52.2939	3808758
3.2.220222.52329	20230928_apagotto_AP14bis_FXII_all1ul_inj_F12fastasearchpluscontaminants	2	20230928_224346	230928_EC1_apagotto_AP14bis_XII_Mpro_2.raw	3	40806	P00748	0.753	460	0	0.996446	1178791000	15	True	True	1689.95	DIRPWCFVLNRDR	0	3	_[DimethNter0]DIRPWC[Carbamidomethyl (C)]FVLNRDR_	5	54.2503	794425
3.2.220222.52329	20230928_apagotto_AP14bis_FXII_all1ul_inj_F12fastasearchpluscontaminants	2	20230928_224346	230928_EC1_apagotto_AP14bis_XII_Mpro_2.raw	3	40806	P00748	0.753	460	0	0.996446	1178791000	15	True	True	2325.54	NWGLGGHAFCRNPDNDIRPW	0	3	_NWGLGGHAFC[Carbamidomethyl (C)]RNPDNDIRPW_	8	48.8329	1901182
3.2.220222.52329	20230928_apagotto_AP14bis_FXII_all1ul_inj_F12fastasearchpluscontaminants	2	20230928_224346	230928_EC1_apagotto_AP14bis_XII_Mpro_2.raw	3	40806	P00748	0.753	460	0	0.996446	1178791000	15	True	True	1343.54	AHCQRLASQACR	0	3	_AHC[Carbamidomethyl (C)]QRLASQAC[Carbamidomethyl (C)]R_	9	19.3078	1981039
3.2.220222.52329	20230928_apagotto_AP14bis_FXII_all1ul_inj_F12fastasearchpluscontaminants	2	20230928_224346	230928_EC1_apagotto_AP14bis_XII_Mpro_2.raw	3	40806	P00748	0.753	460	0	0.996446	1178791000	15	True	True	1759.07	HCQKEKCFEPQLLR	0	4	_HC[Carbamidomethyl (C)]QK[DimethLys0]EK[DimethLys0]C[Carbamidomethyl (C)]FEPQLLR_	9	29.7125	2364500
3.2.220222.52329	20230928_apagotto_AP14bis_FXII_all1ul_inj_F12fastasearchpluscontaminants	2	20230928_224346	230928_EC1_apagotto_AP14bis_XII_Mpro_2.raw	3	40806	P00748	0.753	460	0	0.996446	1178791000	15	True	True	1759.07	HCQKEKCFEPQLLR	0	3	_HC[Carbamidomethyl (C)]QK[DimethLys0]EK[DimethLys0]C[Carbamidomethyl (C)]FEPQLLR_	8	29.7125	264978
3.2.220222.52329	20230928_apagotto_AP14bis_FXII_all1ul_inj_F12fastasearchpluscontaminants	2	20230928_224346	230928_EC1_apagotto_AP14bis_XII_Mpro_2.raw	3	40806	P00748	0.753	460	0	0.996446	1178791000	15	True	True	1759.07	HCQKEKCFEPQLLR	0	4	_[DimethNter0]HC[Carbamidomethyl (C)]QK[DimethLys0]EK[DimethLys0]C[Carbamidomethyl (C)]FEPQLLR_	7	30.3072	676733
3.2.220222.52329	20230928_apagotto_AP14bis_FXII_all1ul_inj_F12fastasearchpluscontaminants	2	20230928_224346	230928_EC1_apagotto_AP14bis_XII_Mpro_2.raw	3	40806	P00748	0.753	460	0	0.996446	1178791000	15	True	True	1759.07	HCQKEKCFEPQLLR	0	3	_[DimethNter0]HC[Carbamidomethyl (C)]QK[DimethLys0]EK[DimethLys0]C[Carbamidomethyl (C)]FEPQLLR_	5	30.3575	3019875
3.2.220222.52329	20230928_apagotto_AP14bis_FXII_all1ul_inj_F12fastasearchpluscontaminants	2	20230928_224346	230928_EC1_apagotto_AP14bis_XII_Mpro_2.raw	3	40806	P00748	0.753	460	0	0.996446	1178791000	15	True	True	1859.09	NPDNDIRPWCFVLNR	0	3	_NPDNDIRPWC[Carbamidomethyl (C)]FVLNR_	9	56.3204	2987319
3.2.220222.52329	20230928_apagotto_AP14bis_FXII_all1ul_inj_F12fastasearchpluscontaminants	2	20230928_224346	230928_EC1_apagotto_AP14bis_XII_Mpro_2.raw	3	40806	P00748	0.753	460	0	0.996446	1178791000	15	True	True	1859.09	NPDNDIRPWCFVLNR	0	2	_NPDNDIRPWC[Carbamidomethyl (C)]FVLNR_	7	56.3204	414957
3.2.220222.52329	20230928_apagotto_AP14bis_FXII_all1ul_inj_F12fastasearchpluscontaminants	2	20230928_224346	230928_EC1_apagotto_AP14bis_XII_Mpro_2.raw	3	40806	P00748	0.753	460	0	0.996446	1178791000	15	True	True	1583.83	CSAPDVHGSSILPGML	0	2	_C[Carbamidomethyl (C)]SAPDVHGSSILPGML_	9	57.5089	2268270
3.2.220222.52329	20230928_apagotto_AP14bis_FXII_all1ul_inj_F12fastasearchpluscontaminants	2	20230928_224346	230928_EC1_apagotto_AP14bis_XII_Mpro_2.raw	3	40806	P00748	0.753	460	0	0.996446	1178791000	15	True	True	1587.72	SGGPLVCEDQAAERR	0	3	_SGGPLVC[Carbamidomethyl (C)]EDQAAERR_	9	26.8759	659869
3.2.220222.52329	20230928_apagotto_AP14bis_FXII_all1ul_inj_F12fastasearchpluscontaminants	2	20230928_224346	230928_EC1_apagotto_AP14bis_XII_Mpro_2.raw	3	40806	P00748	0.753	460	0	0.996446	1178791000	15	True	True	1587.72	SGGPLVCEDQAAERR	0	3	_[DimethNter0]SGGPLVC[Carbamidomethyl (C)]EDQAAERR_	4	27.2668	1004096
3.2.220222.52329	20230928_apagotto_AP14bis_FXII_all1ul_inj_F12fastasearchpluscontaminants	2	20230928_224346	230928_EC1_apagotto_AP14bis_XII_Mpro_2.raw	3	40806	P00748	0.753	460	0	0.996446	1178791000	15	True	True	1840.04	EQPPSLTRNGPLSCGQR	0	3	_EQPPSLTRNGPLSC[Carbamidomethyl (C)]GQR_	9	33.2547	955923
3.2.220222.52329	20230928_apagotto_AP14bis_FXII_all1ul_inj_F12fastasearchpluscontaminants	2	20230928_224346	230928_EC1_apagotto_AP14bis_XII_Mpro_2.raw	3	40806	P00748	0.753	460	0	0.996446	1178791000	15	True	True	1205.38	GRGLSYRGLAR	0	3	_GRGLSYRGLAR_	8	24.3907	1939286
3.2.220222.52329	20230928_apagotto_AP14bis_FXII_all1ul_inj_F12fastasearchpluscontaminants	2	20230928_224346	230928_EC1_apagotto_AP14bis_XII_Mpro_2.raw	3	40806	P00748	0.753	460	0	0.996446	1178791000	15	True	True	1331.47	NWGLGGHAFCRN	0	3	_NWGLGGHAFC[Carbamidomethyl (C)]RN_	9	36.8338	5834819
3.2.220222.52329	20230928_apagotto_AP14bis_FXII_all1ul_inj_F12fastasearchpluscontaminants	2	20230928_224346	230928_EC1_apagotto_AP14bis_XII_Mpro_2.raw	3	40806	P00748	0.753	460	0	0.996446	1178791000	15	True	True	1331.47	NWGLGGHAFCRN	0	2	_NWGLGGHAFC[Carbamidomethyl (C)]RN_	8	36.7838	5634232
3.2.220222.52329	20230928_apagotto_AP14bis_FXII_all1ul_inj_F12fastasearchpluscontaminants	2	20230928_224346	230928_EC1_apagotto_AP14bis_XII_Mpro_2.raw	3	40806	P00748	0.753	460	0	0.996446	1178791000	15	True	True	1972.19	HKNEIWYRTEQAAVAR	0	3	_HK[DimethLys0]NEIWYRTEQAAVAR_	9	29.8429	165254
3.2.220222.52329	20230928_apagotto_AP14bis_FXII_all1ul_inj_F12fastasearchpluscontaminants	2	20230928_224346	230928_EC1_apagotto_AP14bis_XII_Mpro_2.raw	3	40806	P00748	0.753	460	0	0.996446	1178791000	15	True	True	1972.19	HKNEIWYRTEQAAVAR	0	4	_HK[DimethLys0]NEIWYRTEQAAVAR_	6	29.905	847352
3.2.220222.52329	20230928_apagotto_AP14bis_FXII_all1ul_inj_F12fastasearchpluscontaminants	2	20230928_224346	230928_EC1_apagotto_AP14bis_XII_Mpro_2.raw	3	40806	P00748	0.753	460	0	0.996446	1178791000	15	True	True	1972.19	HKNEIWYRTEQAAVAR	0	4	_[DimethNter0]HK[DimethLys0]NEIWYRTEQAAVAR_	2	30.0791	196479
3.2.220222.52329	20230928_apagotto_AP14bis_FXII_all1ul_inj_F12fastasearchpluscontaminants	2	20230928_224346	230928_EC1_apagotto_AP14bis_XII_Mpro_2.raw	3	40806	P00748	0.753	460	0	0.996446	1178791000	15	True	True	1431.54	SGGPLVCEDQAAER	0	2	_[DimethNter0]SGGPLVC[Carbamidomethyl (C)]EDQAAER_	9	30.1205	124583
3.2.220222.52329	20230928_apagotto_AP14bis_FXII_all1ul_inj_F12fastasearchpluscontaminants	2	20230928_224346	230928_EC1_apagotto_AP14bis_XII_Mpro_2.raw	3	40806	P00748	0.753	460	0	0.996446	1178791000	15	True	True	1431.54	SGGPLVCEDQAAER	0	2	_SGGPLVC[Carbamidomethyl (C)]EDQAAER_	8	29.5266	3525889
3.2.220222.52329	20230928_apagotto_AP14bis_FXII_all1ul_inj_F12fastasearchpluscontaminants	2	20230928_224346	230928_EC1_apagotto_AP14bis_XII_Mpro_2.raw	3	40806	P00748	0.753	460	0	0.996446	1178791000	15	True	True	3058.44	NWGLGGHAFCRNPDNDIRPWCFVLNR	0	5	_NWGLGGHAFC[Carbamidomethyl (C)]RNPDNDIRPWC[Carbamidomethyl (C)]FVLNR_	9	56.1715	727206
3.2.220222.52329	20230928_apagotto_AP14bis_FXII_all1ul_inj_F12fastasearchpluscontaminants	2	20230928_224346	230928_EC1_apagotto_AP14bis_XII_Mpro_2.raw	3	40806	P00748	0.753	460	0	0.996446	1178791000	15	True	True	3058.44	NWGLGGHAFCRNPDNDIRPWCFVLNR	0	4	_NWGLGGHAFC[Carbamidomethyl (C)]RNPDNDIRPWC[Carbamidomethyl (C)]FVLNR_	9	56.9617	11421240
3.2.220222.52329	20230928_apagotto_AP14bis_FXII_all1ul_inj_F12fastasearchpluscontaminants	2	20230928_224346	230928_EC1_apagotto_AP14bis_XII_Mpro_2.raw	3	40806	P00748	0.753	460	0	0.996446	1178791000	15	True	True	3058.44	NWGLGGHAFCRNPDNDIRPWCFVLNR	0	3	_NWGLGGHAFC[Carbamidomethyl (C)]RNPDNDIRPWC[Carbamidomethyl (C)]FVLNR_	8	56.122	1546784
3.2.220222.52329	20230928_apagotto_AP14bis_FXII_all1ul_inj_F12fastasearchpluscontaminants	2	20230928_224346	230928_EC1_apagotto_AP14bis_XII_Mpro_2.raw	3	40806	P00748	0.753	460	0	0.996446	1178791000	15	True	True	1586.78	CYDGRGLSYRGLAR	0	4	_[DimethNter0]C[Carbamidomethyl (C)]YDGRGLSYRGLAR_	9	32.2481	688740
3.2.220222.52329	20230928_apagotto_AP14bis_FXII_all1ul_inj_F12fastasearchpluscontaminants	2	20230928_224346	230928_EC1_apagotto_AP14bis_XII_Mpro_2.raw	3	40806	P00748	0.753	460	0	0.996446	1178791000	15	True	True	1586.78	CYDGRGLSYRGLAR	0	3	_[DimethNter0]C[Carbamidomethyl (C)]YDGRGLSYRGLAR_	4	32.2981	758446
3.2.220222.52329	20230928_apagotto_AP14bis_FXII_all1ul_inj_F12fastasearchpluscontaminants	2	20230928_224346	230928_EC1_apagotto_AP14bis_XII_Mpro_2.raw	3	40806	P00748	0.753	460	0	0.996446	1178791000	15	True	True	1586.78	CYDGRGLSYRGLAR	0	3	_C[Carbamidomethyl (C)]YDGRGLSYRGLAR_	2	30.5024	490381
3.2.220222.52329	20230928_apagotto_AP14bis_FXII_all1ul_inj_F12fastasearchpluscontaminants	2	20230928_224346	230928_EC1_apagotto_AP14bis_XII_Mpro_2.raw	3	40806	P00748	0.753	460	0	0.996446	1178791000	15	True	True	1102.36	LHVPLMPAQP	0	2	_LHVPLMPAQP_	9	51.6516	706277
3.2.220222.52329	20230928_apagotto_AP14bis_FXII_all1ul_inj_F12fastasearchpluscontaminants	2	20230928_224346	230928_EC1_apagotto_AP14bis_XII_Mpro_2.raw	3	40806	P00748	0.753	460	0	0.996446	1178791000	15	True	True	1217.37	NWGLGGHAFCR	0	3	_NWGLGGHAFC[Carbamidomethyl (C)]R_	9	38.8576	1355243
3.2.220222.52329	20230928_apagotto_AP14bis_FXII_all1ul_inj_F12fastasearchpluscontaminants	2	20230928_224346	230928_EC1_apagotto_AP14bis_XII_Mpro_2.raw	3	40806	P00748	0.753	460	0	0.996446	1178791000	15	True	True	1217.37	NWGLGGHAFCR	0	2	_NWGLGGHAFC[Carbamidomethyl (C)]R_	9	38.823	18499190
3.2.220222.52329	20230928_apagotto_AP14bis_FXII_all1ul_inj_F12fastasearchpluscontaminants	2	20230928_224346	230928_EC1_apagotto_AP14bis_XII_Mpro_2.raw	3	40806	P00748	0.753	460	0	0.996446	1178791000	15	True	True	1395.46	CATTPNFDQDQR	0	2	_C[Carbamidomethyl (C)]ATTPNFDQDQR_	9	28.4585	639649
3.2.220222.52329	20230928_apagotto_AP14bis_FXII_all1ul_inj_F12fastasearchpluscontaminants	2	20230928_224346	230928_EC1_apagotto_AP14bis_XII_Mpro_2.raw	3	40806	P00748	0.753	460	0	0.996446	1178791000	15	True	True	1292.32	ATTPNFDQDQR	0	2	_ATTPNFDQDQR_	9	27.5505	540636
3.2.220222.52329	20230928_apagotto_AP14bis_FXII_all1ul_inj_F12fastasearchpluscontaminants	2	20230928_224346	230928_EC1_apagotto_AP14bis_XII_Mpro_2.raw	3	40806	P00748	0.753	460	0	0.996446	1178791000	15	True	True	2279.6	AHCQRLASQACRTNPCLHGGR	0	4	_AHC[Carbamidomethyl (C)]QRLASQAC[Carbamidomethyl (C)]RTNPC[Carbamidomethyl (C)]LHGGR_	9	20.2518	502983
3.2.220222.52329	20230928_apagotto_AP14bis_FXII_all1ul_inj_F12fastasearchpluscontaminants	2	20230928_224346	230928_EC1_apagotto_AP14bis_XII_Mpro_2.raw	3	40806	P00748	0.753	460	0	0.996446	1178791000	15	True	True	2279.6	AHCQRLASQACRTNPCLHGGR	0	5	_AHC[Carbamidomethyl (C)]QRLASQAC[Carbamidomethyl (C)]RTNPC[Carbamidomethyl (C)]LHGGR_	9	20.2518	0
3.2.220222.52329	20230928_apagotto_AP14bis_FXII_all1ul_inj_F12fastasearchpluscontaminants	2	20230928_224346	230928_EC1_apagotto_AP14bis_XII_Mpro_2.raw	3	40806	P00748	0.753	460	0	0.996446	1178791000	15	True	True	2279.6	AHCQRLASQACRTNPCLHGGR	0	5	_[DimethNter0]AHC[Carbamidomethyl (C)]QRLASQAC[Carbamidomethyl (C)]RTNPC[Carbamidomethyl (C)]LHGGR_	3	20.3791	54679.1
3.2.220222.52329	20230928_apagotto_AP14bis_FXII_all1ul_inj_F12fastasearchpluscontaminants	2	20230928_224346	230928_EC1_apagotto_AP14bis_XII_Mpro_2.raw	3	40806	P00748	0.753	460	0	0.996446	1178791000	15	True	True	4579.05	CSAPDVHGSSILPGMLCAGFLEGGTDACQGDSGGPLVCEDQAAERR	0	4	_C[Carbamidomethyl (C)]SAPDVHGSSILPGMLC[Carbamidomethyl (C)]AGFLEGGTDAC[Carbamidomethyl (C)]QGDSGGPLVC[Carbamidomethyl (C)]EDQAAERR_	9	60.7276	25214760
3.2.220222.52329	20230928_apagotto_AP14bis_FXII_all1ul_inj_F12fastasearchpluscontaminants	2	20230928_224346	230928_EC1_apagotto_AP14bis_XII_Mpro_2.raw	3	40806	P00748	0.753	460	0	0.996446	1178791000	15	True	True	4579.05	CSAPDVHGSSILPGMLCAGFLEGGTDACQGDSGGPLVCEDQAAERR	0	4	_C[Carbamidomethyl (C)]SAPDVHGSSILPGM[Oxidation (M)]LC[Carbamidomethyl (C)]AGFLEGGTDAC[Carbamidomethyl (C)]QGDSGGPLVC[Carbamidomethyl (C)]EDQAAERR_	9	56.2215	493140
3.2.220222.52329	20230928_apagotto_AP14bis_FXII_all1ul_inj_F12fastasearchpluscontaminants	2	20230928_224346	230928_EC1_apagotto_AP14bis_XII_Mpro_2.raw	3	40806	P00748	0.753	460	0	0.996446	1178791000	15	True	True	4579.05	CSAPDVHGSSILPGMLCAGFLEGGTDACQGDSGGPLVCEDQAAERR	0	5	_C[Carbamidomethyl (C)]SAPDVHGSSILPGMLC[Carbamidomethyl (C)]AGFLEGGTDAC[Carbamidomethyl (C)]QGDSGGPLVC[Carbamidomethyl (C)]EDQAAERR_	7	60.5287	100198
3.2.220222.52329	20230928_apagotto_AP14bis_FXII_all1ul_inj_F12fastasearchpluscontaminants	2	20230928_224346	230928_EC1_apagotto_AP14bis_XII_Mpro_2.raw	3	40806	P00748	0.753	460	0	0.996446	1178791000	15	True	True	3318.6	SYRLHEAFSPVSYQHDLALLRLQEDADGS	0	4	_SYRLHEAFSPVSYQHDLALLRLQEDADGS_	8	53.9103	426312
3.2.220222.52329	20230928_apagotto_AP14bis_FXII_all1ul_inj_F12fastasearchpluscontaminants	2	20230928_224346	230928_EC1_apagotto_AP14bis_XII_Mpro_2.raw	3	40806	P00748	0.753	460	0	0.996446	1178791000	15	True	True	3318.6	SYRLHEAFSPVSYQHDLALLRLQEDADGS	0	3	_SYRLHEAFSPVSYQHDLALLRLQEDADGS_	8	53.9103	140344
3.2.220222.52329	20230928_apagotto_AP14bis_FXII_all1ul_inj_F12fastasearchpluscontaminants	2	20230928_224346	230928_EC1_apagotto_AP14bis_XII_Mpro_2.raw	3	40806	P00748	0.753	460	0	0.996446	1178791000	15	True	True	3318.6	SYRLHEAFSPVSYQHDLALLRLQEDADGS	0	5	_SYRLHEAFSPVSYQHDLALLRLQEDADGS_	6	53.9595	231030
3.2.220222.52329	20230928_apagotto_AP14bis_FXII_all1ul_inj_F12fastasearchpluscontaminants	2	20230928_224346	230928_EC1_apagotto_AP14bis_XII_Mpro_2.raw	3	40806	P00748	0.753	460	0	0.996446	1178791000	15	True	True	1936.07	SYRLHEAFSPVSYQHD	0	3	_SYRLHEAFSPVSYQHD_	9	36.5357	687124
3.2.220222.52329	20230928_apagotto_AP14bis_FXII_all1ul_inj_F12fastasearchpluscontaminants	2	20230928_224346	230928_EC1_apagotto_AP14bis_XII_Mpro_2.raw	3	40806	P00748	0.753	460	0	0.996446	1178791000	15	True	True	1991.27	TNPCLHGGRCLEVEGHRL	0	4	_TNPC[Carbamidomethyl (C)]LHGGRC[Carbamidomethyl (C)]LEVEGHRL_	8	30.3072	301120
3.2.220222.52329	20230928_apagotto_AP14bis_FXII_all1ul_inj_F12fastasearchpluscontaminants	2	20230928_224346	230928_EC1_apagotto_AP14bis_XII_Mpro_2.raw	3	40806	P00748	0.753	460	0	0.996446	1178791000	15	True	True	1991.27	TNPCLHGGRCLEVEGHRL	0	3	_TNPC[Carbamidomethyl (C)]LHGGRC[Carbamidomethyl (C)]LEVEGHRL_	8	30.2361	899453
3.2.220222.52329	20230928_apagotto_AP14bis_FXII_all1ul_inj_F12fastasearchpluscontaminants	2	20230928_224346	230928_EC1_apagotto_AP14bis_XII_Mpro_2.raw	3	40806	P00748	0.753	460	0	0.996446	1178791000	15	True	True	1022.19	CFVLNRDR	0	3	_C[Carbamidomethyl (C)]FVLNRDR_	9	28.4096	419395
3.2.220222.52329	20230928_apagotto_AP14bis_FXII_all1ul_inj_F12fastasearchpluscontaminants	2	20230928_224346	230928_EC1_apagotto_AP14bis_XII_Mpro_2.raw	3	40806	P00748	0.753	460	0	0.996446	1178791000	15	True	True	1517.68	GEPCHFPFQYHR	0	3	_GEPC[Carbamidomethyl (C)]HFPFQYHR_	9	35.0529	283108
3.2.220222.52329	20230928_apagotto_AP14bis_FXII_all1ul_inj_F12fastasearchpluscontaminants	2	20230928_224346	230928_EC1_apagotto_AP14bis_XII_Mpro_2.raw	3	40806	P00748	0.753	460	0	0.996446	1178791000	15	True	True	1517.68	GEPCHFPFQYHR	0	3	_[DimethNter0]GEPC[Carbamidomethyl (C)]HFPFQYHR_	9	35.649	99005.5
3.2.220222.52329	20230928_apagotto_AP14bis_FXII_all1ul_inj_F12fastasearchpluscontaminants	2	20230928_224346	230928_EC1_apagotto_AP14bis_XII_Mpro_2.raw	3	40806	P00748	0.753	460	0	0.996446	1178791000	15	True	True	1517.68	GEPCHFPFQYHR	0	4	_[DimethNter0]GEPC[Carbamidomethyl (C)]HFPFQYHR_	3	35.6938	68296.6
3.2.220222.52329	20230928_apagotto_AP14bis_FXII_all1ul_inj_F12fastasearchpluscontaminants	2	20230928_224346	230928_EC1_apagotto_AP14bis_XII_Mpro_2.raw	3	40806	P00748	0.753	460	0	0.996446	1178791000	15	True	True	738.858	PCLHGGR	0	2	_PC[Carbamidomethyl (C)]LHGGR_	9	19.1577	754634
3.2.220222.52329	20230928_apagotto_AP14bis_FXII_all1ul_inj_F12fastasearchpluscontaminants	2	20230928_224346	230928_EC1_apagotto_AP14bis_XII_Mpro_2.raw	3	40806	P00748	0.753	460	0	0.996446	1178791000	15	True	True	2970.2	LCAGFLEGGTDACQGDSGGPLVCEDQAAER	0	3	_LC[Carbamidomethyl (C)]AGFLEGGTDAC[Carbamidomethyl (C)]QGDSGGPLVC[Carbamidomethyl (C)]EDQAAER_	9	51.8007	257741
3.2.220222.52329	20230928_apagotto_AP14bis_FXII_all1ul_inj_F12fastasearchpluscontaminants	2	20230928_224346	230928_EC1_apagotto_AP14bis_XII_Mpro_2.raw	3	40806	P00748	0.753	460	0	0.996446	1178791000	15	True	True	1603.68	GDSGGPLVCEDQAAER	0	2	_GDSGGPLVC[Carbamidomethyl (C)]EDQAAER_	9	30.7217	187673
3.2.220222.52329	20230928_apagotto_AP14bis_FXII_all1ul_inj_F12fastasearchpluscontaminants	2	20230928_224346	230928_EC1_apagotto_AP14bis_XII_Mpro_2.raw	3	40806	P00748	0.753	460	0	0.996446	1178791000	15	True	True	1603.68	GDSGGPLVCEDQAAER	0	2	_[DimethNter0]GDSGGPLVC[Carbamidomethyl (C)]EDQAAER_	7	31.4258	90904.8
3.2.220222.52329	20230928_apagotto_AP14bis_FXII_all1ul_inj_F12fastasearchpluscontaminants	2	20230928_224346	230928_EC1_apagotto_AP14bis_XII_Mpro_2.raw	3	40806	P00748	0.753	460	0	0.996446	1178791000	15	True	True	1933.17	RLTLQGIISWGSGCGDRN	0	3	_RLTLQGIISWGSGC[Carbamidomethyl (C)]GDRN_	9	56.4691	186342
3.2.220222.52329	20230928_apagotto_AP14bis_FXII_all1ul_inj_F12fastasearchpluscontaminants	2	20230928_224346	230928_EC1_apagotto_AP14bis_XII_Mpro_2.raw	3	40806	P00748	0.753	460	0	0.996446	1178791000	15	True	True	2020.27	RNHSCEPCQTLAVRSYR	0	4	_RNHSC[Carbamidomethyl (C)]EPC[Carbamidomethyl (C)]QTLAVRSYR_	9	24.1994	183110
3.2.220222.52329	20230928_apagotto_AP14bis_FXII_all1ul_inj_F12fastasearchpluscontaminants	2	20230928_224346	230928_EC1_apagotto_AP14bis_XII_Mpro_2.raw	3	40806	P00748	0.753	460	0	0.996446	1178791000	15	True	True	1344.46	GGPLVCEDQAAER	0	2	_[DimethNter0]GGPLVC[Carbamidomethyl (C)]EDQAAER_	5	29.6817	157610
3.2.220222.52329	20230928_apagotto_AP14bis_FXII_all1ul_inj_F12fastasearchpluscontaminants	2	20230928_224346	230928_EC1_apagotto_AP14bis_XII_Mpro_2.raw	3	40806	P00748	0.753	460	0	0.996446	1178791000	15	True	True	1206.39	SCEPCQTLAVR	0	2	_SC[Carbamidomethyl (C)]EPC[Carbamidomethyl (C)]QTLAVR_	9	31.8134	156644
3.2.220222.52329	20230928_apagotto_AP14bis_FXII_all1ul_inj_F12fastasearchpluscontaminants	2	20230928_224346	230928_EC1_apagotto_AP14bis_XII_Mpro_2.raw	3	40806	P00748	0.753	460	0	0.996446	1178791000	15	True	True	1206.39	SCEPCQTLAVR	0	2	_[DimethNter0]SC[Carbamidomethyl (C)]EPC[Carbamidomethyl (C)]QTLAVR_	5	32.2981	109632
3.2.220222.52329	20230928_apagotto_AP14bis_FXII_all1ul_inj_F12fastasearchpluscontaminants	2	20230928_224346	230928_EC1_apagotto_AP14bis_XII_Mpro_2.raw	3	40806	P00748	0.753	460	0	0.996446	1178791000	15	True	True	954.067	TNPCLHGGR	0	2	_TNPC[Carbamidomethyl (C)]LHGGR_	9	19.7052	159666800
3.2.220222.52329	20230928_apagotto_AP14bis_FXII_all1ul_inj_F12fastasearchpluscontaminants	2	20230928_224346	230928_EC1_apagotto_AP14bis_XII_Mpro_2.raw	3	40806	P00748	0.753	460	0	0.996446	1178791000	15	True	True	1200.38	NGPLSCGQRLR	0	3	_NGPLSC[Carbamidomethyl (C)]GQRLR_	9	24.4755	11236210
3.2.220222.52329	20230928_apagotto_AP14bis_FXII_all1ul_inj_F12fastasearchpluscontaminants	2	20230928_224346	230928_EC1_apagotto_AP14bis_XII_Mpro_2.raw	3	40806	P00748	0.753	460	0	0.996446	1178791000	15	True	True	1717.92	VTGEPCHFPFQYHR	0	3	_VTGEPC[Carbamidomethyl (C)]HFPFQYHR_	7	37.1817	130030
3.2.220222.52329	20230928_apagotto_AP14bis_FXII_all1ul_inj_F12fastasearchpluscontaminants	2	20230928_224346	230928_EC1_apagotto_AP14bis_XII_Mpro_2.raw	3	40806	P00748	0.753	460	0	0.996446	1178791000	15	True	True	1439.63	FFHKNEIWYR	0	3	_FFHK[DimethLys0]NEIWYR_	9	53.1241	27866240
3.2.220222.52329	20230928_apagotto_AP14bis_FXII_all1ul_inj_F12fastasearchpluscontaminants	2	20230928_224346	230928_EC1_apagotto_AP14bis_XII_Mpro_2.raw	3	40806	P00748	0.753	460	0	0.996446	1178791000	15	True	True	1439.63	FFHKNEIWYR	0	2	_FFHK[DimethLys0]NEIWYR_	9	35.898	121706900
3.2.220222.52329	20230928_apagotto_AP14bis_FXII_all1ul_inj_F12fastasearchpluscontaminants	2	20230928_224346	230928_EC1_apagotto_AP14bis_XII_Mpro_2.raw	3	40806	P00748	0.753	460	0	0.996446	1178791000	15	True	True	1439.63	FFHKNEIWYR	0	3	_[DimethNter0]FFHK[DimethLys0]NEIWYR_	8	35.52	105587
3.2.220222.52329	20230928_apagotto_AP14bis_FXII_all1ul_inj_F12fastasearchpluscontaminants	2	20230928_224346	230928_EC1_apagotto_AP14bis_XII_Mpro_2.raw	3	40806	P00748	0.753	460	0	0.996446	1178791000	15	True	True	942.053	CLEVEGHR	0	2	_C[Carbamidomethyl (C)]LEVEGHR_	9	23.8073	14503970
3.2.220222.52329	20230928_apagotto_AP14bis_FXII_all1ul_inj_F12fastasearchpluscontaminants	2	20230928_224346	230928_EC1_apagotto_AP14bis_XII_Mpro_2.raw	3	40806	P00748	0.753	460	0	0.996446	1178791000	15	True	True	1673.86	SCYDGRGLSYRGLAR	0	4	_SC[Carbamidomethyl (C)]YDGRGLSYRGLAR_	7	31.4599	62916.6
3.2.220222.52329	20230928_apagotto_AP14bis_FXII_all1ul_inj_F12fastasearchpluscontaminants	2	20230928_224346	230928_EC1_apagotto_AP14bis_XII_Mpro_2.raw	3	40806	P00748	0.753	460	0	0.996446	1178791000	15	True	True	1131.26	HFPFQYHR	0	3	_HFPFQYHR_	8	31.0585	86327.2
3.2.220222.52329	20230928_apagotto_AP14bis_FXII_all1ul_inj_F12fastasearchpluscontaminants	2	20230928_224346	230928_EC1_apagotto_AP14bis_XII_Mpro_2.raw	3	40806	P00748	0.753	460	0	0.996446	1178791000	15	True	True	1499.68	SQACRTNPCLHGGR	0	4	_SQAC[Carbamidomethyl (C)]RTNPC[Carbamidomethyl (C)]LHGGR_	9	19.5066	0
3.2.220222.52329	20230928_apagotto_AP14bis_FXII_all1ul_inj_F12fastasearchpluscontaminants	2	20230928_224346	230928_EC1_apagotto_AP14bis_XII_Mpro_2.raw	3	40806	P00748	0.753	460	0	0.996446	1178791000	15	True	True	1939.13	TTLSGAPCQPWASEATYR	0	2	_TTLSGAPC[Carbamidomethyl (C)]QPWASEATYR_	8	44.2415	41145010
3.2.220222.52329	20230928_apagotto_AP14bis_FXII_all1ul_inj_F12fastasearchpluscontaminants	2	20230928_224346	230928_EC1_apagotto_AP14bis_XII_Mpro_2.raw	3	40806	P00748	0.753	460	0	0.996446	1178791000	15	True	True	931.029	NGPLSCGQR	0	2	_NGPLSC[Carbamidomethyl (C)]GQR_	8	21.6973	8897324
3.2.220222.52329	20230928_apagotto_AP14bis_FXII_all1ul_inj_F12fastasearchpluscontaminants	2	20230928_224346	230928_EC1_apagotto_AP14bis_XII_Mpro_2.raw	3	40806	P00748	0.753	460	0	0.996446	1178791000	15	True	True	1295.49	CLEVEGHRLCH	0	3	_C[Carbamidomethyl (C)]LEVEGHRLC[Carbamidomethyl (C)]H_	7	27.2668	4107813
3.2.220222.52329	20230928_apagotto_AP14bis_FXII_all1ul_inj_F12fastasearchpluscontaminants	2	20230928_224346	230928_EC1_apagotto_AP14bis_XII_Mpro_2.raw	3	40806	P00748	0.753	460	0	0.996446	1178791000	15	True	True	1295.49	CLEVEGHRLCH	0	2	_C[Carbamidomethyl (C)]LEVEGHRLC[Carbamidomethyl (C)]H_	6	27.3162	358041
3.2.220222.52329	20230928_apagotto_AP14bis_FXII_all1ul_inj_F12fastasearchpluscontaminants	2	20230928_224346	230928_EC1_apagotto_AP14bis_XII_Mpro_2.raw	3	40806	P00748	0.753	460	0	0.996446	1178791000	15	True	True	1816.05	CQCKGPDAHCQRLASQA	0	3	_C[Carbamidomethyl (C)]QC[Carbamidomethyl (C)]K[DimethLys0]GPDAHC[Carbamidomethyl (C)]QRLASQA_	7	20.6833	6462764
3.2.220222.52329	20230928_apagotto_AP14bis_FXII_all1ul_inj_F12fastasearchpluscontaminants	2	20230928_224346	230928_EC1_apagotto_AP14bis_XII_Mpro_2.raw	3	40806	P00748	0.753	460	0	0.996446	1178791000	15	True	True	1592.77	EIWYRTEQAAVAR	0	3	_EIWYRTEQAAVAR_	8	36.3856	6416835
3.2.220222.52329	20230928_apagotto_AP14bis_FXII_all1ul_inj_F12fastasearchpluscontaminants	2	20230928_224346	230928_EC1_apagotto_AP14bis_XII_Mpro_2.raw	3	40806	P00748	0.753	460	0	0.996446	1178791000	15	True	True	1592.77	EIWYRTEQAAVAR	0	3	_[DimethNter0]EIWYRTEQAAVAR_	6	36.6838	3201159
3.2.220222.52329	20230928_apagotto_AP14bis_FXII_all1ul_inj_F12fastasearchpluscontaminants	2	20230928_224346	230928_EC1_apagotto_AP14bis_XII_Mpro_2.raw	3	40806	P00748	0.753	460	0	0.996446	1178791000	15	True	True	1592.77	EIWYRTEQAAVAR	0	2	_EIWYRTEQAAVAR_	6	36.2438	1348440
3.2.220222.52329	20230928_apagotto_AP14bis_FXII_all1ul_inj_F12fastasearchpluscontaminants	2	20230928_224346	230928_EC1_apagotto_AP14bis_XII_Mpro_2.raw	3	40806	P00748	0.753	460	0	0.996446	1178791000	15	True	True	1592.77	EIWYRTEQAAVAR	0	2	_[DimethNter0]EIWYRTEQAAVAR_	3	36.6838	3149654
3.2.220222.52329	20230928_apagotto_AP14bis_FXII_all1ul_inj_F12fastasearchpluscontaminants	2	20230928_224346	230928_EC1_apagotto_AP14bis_XII_Mpro_2.raw	3	40806	P00748	0.753	460	0	0.996446	1178791000	15	True	True	902.056	FEPQLLR	0	2	_[DimethNter0]FEPQLLR_	3	44.9368	1361835
3.2.220222.52329	20230928_apagotto_AP14bis_FXII_all1ul_inj_F12fastasearchpluscontaminants	2	20230928_224346	230928_EC1_apagotto_AP14bis_XII_Mpro_2.raw	3	40806	P00748	0.753	460	0	0.996446	1178791000	15	True	True	821.93	SYRGLAR	0	2	_SYRGLAR_	8	29.0255	4322529
3.2.220222.52329	20230928_apagotto_AP14bis_FXII_all1ul_inj_F12fastasearchpluscontaminants	2	20230928_224346	230928_EC1_apagotto_AP14bis_XII_Mpro_2.raw	3	40806	P00748	0.753	460	0	0.996446	1178791000	15	True	True	1387.6	RLTLQGIISWGSG	0	2	_RLTLQGIISWGSG_	8	63.153	1143968
3.2.220222.52329	20230928_apagotto_AP14bis_FXII_all1ul_inj_F12fastasearchpluscontaminants	2	20230928_224346	230928_EC1_apagotto_AP14bis_XII_Mpro_2.raw	3	40806	P00748	0.753	460	0	0.996446	1178791000	15	True	True	1864.08	NHSCEPCQTLAVRSYR	0	3	_NHSC[Carbamidomethyl (C)]EPC[Carbamidomethyl (C)]QTLAVRSYR_	8	27.6458	1064799
3.2.220222.52329	20230928_apagotto_AP14bis_FXII_all1ul_inj_F12fastasearchpluscontaminants	2	20230928_224346	230928_EC1_apagotto_AP14bis_XII_Mpro_2.raw	3	40806	P00748	0.753	460	0	0.996446	1178791000	15	True	True	1164.28	YRTEQAAVAR	0	3	_YRTEQAAVAR_	8	20.3291	479640
3.2.220222.52329	20230928_apagotto_AP14bis_FXII_all1ul_inj_F12fastasearchpluscontaminants	2	20230928_224346	230928_EC1_apagotto_AP14bis_XII_Mpro_2.raw	3	40806	P00748	0.753	460	0	0.996446	1178791000	15	True	True	1164.28	YRTEQAAVAR	0	2	_YRTEQAAVAR_	4	20.3291	965344
3.2.220222.52329	20230928_apagotto_AP14bis_FXII_all1ul_inj_F12fastasearchpluscontaminants	2	20230928_224346	230928_EC1_apagotto_AP14bis_XII_Mpro_2.raw	3	40806	P00748	0.753	460	0	0.996446	1178791000	15	True	True	2016.26	PDNDIRPWCFVLNRDR	0	4	_PDNDIRPWC[Carbamidomethyl (C)]FVLNRDR_	8	51.0645	797260
3.2.220222.52329	20230928_apagotto_AP14bis_FXII_all1ul_inj_F12fastasearchpluscontaminants	2	20230928_224346	230928_EC1_apagotto_AP14bis_XII_Mpro_2.raw	3	40806	P00748	0.753	460	0	0.996446	1178791000	15	True	True	2016.26	PDNDIRPWCFVLNRDR	0	3	_PDNDIRPWC[Carbamidomethyl (C)]FVLNRDR_	7	51.0645	886546
3.2.220222.52329	20230928_apagotto_AP14bis_FXII_all1ul_inj_F12fastasearchpluscontaminants	2	20230928_224346	230928_EC1_apagotto_AP14bis_XII_Mpro_2.raw	3	40806	P00748	0.753	460	0	0.996446	1178791000	15	True	True	1055.21	CLEVEGHRL	0	2	_C[Carbamidomethyl (C)]LEVEGHRL_	7	33.99	1631635
3.2.220222.52329	20230928_apagotto_AP14bis_FXII_all1ul_inj_F12fastasearchpluscontaminants	2	20230928_224346	230928_EC1_apagotto_AP14bis_XII_Mpro_2.raw	3	40806	P00748	0.753	460	0	0.996446	1178791000	15	True	True	1055.21	CLEVEGHRL	0	3	_C[Carbamidomethyl (C)]LEVEGHRL_	6	33.99	142150
3.2.220222.52329	20230928_apagotto_AP14bis_FXII_all1ul_inj_F12fastasearchpluscontaminants	2	20230928_224346	230928_EC1_apagotto_AP14bis_XII_Mpro_2.raw	3	40806	P00748	0.753	460	0	0.996446	1178791000	15	True	True	2109.39	EQPPSLTRNGPLSCGQRLR	0	4	_EQPPSLTRNGPLSC[Carbamidomethyl (C)]GQRLR_	8	34.1889	478699
3.2.220222.52329	20230928_apagotto_AP14bis_FXII_all1ul_inj_F12fastasearchpluscontaminants	2	20230928_224346	230928_EC1_apagotto_AP14bis_XII_Mpro_2.raw	3	40806	P00748	0.753	460	0	0.996446	1178791000	15	True	True	2109.39	EQPPSLTRNGPLSCGQRLR	0	3	_EQPPSLTRNGPLSC[Carbamidomethyl (C)]GQRLR_	1	34.1889	784600
3.2.220222.52329	20230928_apagotto_AP14bis_FXII_all1ul_inj_F12fastasearchpluscontaminants	2	20230928_224346	230928_EC1_apagotto_AP14bis_XII_Mpro_2.raw	3	40806	P00748	0.753	460	0	0.996446	1178791000	15	True	True	2536.76	HKGRPGPQPWCATTPNFDQDQR	0	4	_[DimethNter0]HK[DimethLys0]GRPGPQPWC[Carbamidomethyl (C)]ATTPNFDQDQR_	8	33.9401	704347
3.2.220222.52329	20230928_apagotto_AP14bis_FXII_all1ul_inj_F12fastasearchpluscontaminants	2	20230928_224346	230928_EC1_apagotto_AP14bis_XII_Mpro_2.raw	3	40806	P00748	0.753	460	0	0.996446	1178791000	15	True	True	2536.76	HKGRPGPQPWCATTPNFDQDQR	0	3	_[DimethNter0]HK[DimethLys0]GRPGPQPWC[Carbamidomethyl (C)]ATTPNFDQDQR_	1	33.9401	213011
3.2.220222.52329	20230928_apagotto_AP14bis_FXII_all1ul_inj_F12fastasearchpluscontaminants	2	20230928_224346	230928_EC1_apagotto_AP14bis_XII_Mpro_2.raw	3	40806	P00748	0.753	460	0	0.996446	1178791000	15	True	True	1618.78	TGEPCHFPFQYHR	0	4	_[DimethNter0]TGEPC[Carbamidomethyl (C)]HFPFQYHR_	4	36.2939	309861
3.2.220222.52329	20230928_apagotto_AP14bis_FXII_all1ul_inj_F12fastasearchpluscontaminants	2	20230928_224346	230928_EC1_apagotto_AP14bis_XII_Mpro_2.raw	3	40806	P00748	0.753	460	0	0.996446	1178791000	15	True	True	1618.78	TGEPCHFPFQYHR	0	3	_[DimethNter0]TGEPC[Carbamidomethyl (C)]HFPFQYHR_	2	36.2939	615723
3.2.220222.52329	20230928_apagotto_AP14bis_FXII_all1ul_inj_F12fastasearchpluscontaminants	2	20230928_224346	230928_EC1_apagotto_AP14bis_XII_Mpro_2.raw	3	40806	P00748	0.753	460	0	0.996446	1178791000	15	True	True	2826.18	KAEEHTVVLTVTGEPCHFPFQYHR	0	4	_[DimethNter0]K[DimethLys0]AEEHTVVLTVTGEPC[Carbamidomethyl (C)]HFPFQYHR_	8	43.4474	1043870
3.2.220222.52329	20230928_apagotto_AP14bis_FXII_all1ul_inj_F12fastasearchpluscontaminants	2	20230928_224346	230928_EC1_apagotto_AP14bis_XII_Mpro_2.raw	3	40806	P00748	0.753	460	0	0.996446	1178791000	15	True	True	2826.18	KAEEHTVVLTVTGEPCHFPFQYHR	0	5	_[DimethNter0]K[DimethLys0]AEEHTVVLTVTGEPC[Carbamidomethyl (C)]HFPFQYHR_	8	43.4969	83247.1
3.2.220222.52329	20230928_apagotto_AP14bis_FXII_all1ul_inj_F12fastasearchpluscontaminants	2	20230928_224346	230928_EC1_apagotto_AP14bis_XII_Mpro_2.raw	3	40806	P00748	0.753	460	0	0.996446	1178791000	15	True	True	1119.31	CEPCQTLAVR	0	2	_[DimethNter0]C[Carbamidomethyl (C)]EPC[Carbamidomethyl (C)]QTLAVR_	7	32.8595	937782
3.2.220222.52329	20230928_apagotto_AP14bis_FXII_all1ul_inj_F12fastasearchpluscontaminants	2	20230928_224346	230928_EC1_apagotto_AP14bis_XII_Mpro_2.raw	3	40806	P00748	0.753	460	0	0.996446	1178791000	15	True	True	1119.31	CEPCQTLAVR	0	2	_C[Carbamidomethyl (C)]EPC[Carbamidomethyl (C)]QTLAVR_	5	31.4485	76392
3.2.220222.52329	20230928_apagotto_AP14bis_FXII_all1ul_inj_F12fastasearchpluscontaminants	2	20230928_224346	230928_EC1_apagotto_AP14bis_XII_Mpro_2.raw	3	40806	P00748	0.753	460	0	0.996446	1178791000	15	True	True	1470.68	LASQACRTNPCLHG	0	3	_LASQAC[Carbamidomethyl (C)]RTNPC[Carbamidomethyl (C)]LHG_	8	22.2992	484750
3.2.220222.52329	20230928_apagotto_AP14bis_FXII_all1ul_inj_F12fastasearchpluscontaminants	2	20230928_224346	230928_EC1_apagotto_AP14bis_XII_Mpro_2.raw	3	40806	P00748	0.753	460	0	0.996446	1178791000	15	True	True	1470.68	LASQACRTNPCLHG	0	2	_LASQAC[Carbamidomethyl (C)]RTNPC[Carbamidomethyl (C)]LHG_	1	22.2992	332547
3.2.220222.52329	20230928_apagotto_AP14bis_FXII_all1ul_inj_F12fastasearchpluscontaminants	2	20230928_224346	230928_EC1_apagotto_AP14bis_XII_Mpro_2.raw	3	40806	P00748	0.753	460	0	0.996446	1178791000	15	True	True	2062.21	ACQGDSGGPLVCEDQAAERR	0	3	_AC[Carbamidomethyl (C)]QGDSGGPLVC[Carbamidomethyl (C)]EDQAAERR_	8	28.0655	480228
3.2.220222.52329	20230928_apagotto_AP14bis_FXII_all1ul_inj_F12fastasearchpluscontaminants	2	20230928_224346	230928_EC1_apagotto_AP14bis_XII_Mpro_2.raw	3	40806	P00748	0.753	460	0	0.996446	1178791000	15	True	True	2062.21	ACQGDSGGPLVCEDQAAERR	0	3	_[DimethNter0]AC[Carbamidomethyl (C)]QGDSGGPLVC[Carbamidomethyl (C)]EDQAAERR_	2	28.4585	430927
3.2.220222.52329	20230928_apagotto_AP14bis_FXII_all1ul_inj_F12fastasearchpluscontaminants	2	20230928_224346	230928_EC1_apagotto_AP14bis_XII_Mpro_2.raw	3	40806	P00748	0.753	460	0	0.996446	1178791000	15	True	True	806.029	LHVPLMP	0.00581395	2	_LHVPLMP_	8	52.879	448698
3.2.220222.52329	20230928_apagotto_AP14bis_FXII_all1ul_inj_F12fastasearchpluscontaminants	2	20230928_224346	230928_EC1_apagotto_AP14bis_XII_Mpro_2.raw	3	40806	P00748	0.753	460	0	0.996446	1178791000	15	True	True	1227.35	LSWEYCDLAQ	0	2	_LSWEYC[Carbamidomethyl (C)]DLAQ_	8	55.7351	418267
3.2.220222.52329	20230928_apagotto_AP14bis_FXII_all1ul_inj_F12fastasearchpluscontaminants	2	20230928_224346	230928_EC1_apagotto_AP14bis_XII_Mpro_2.raw	3	40806	P00748	0.753	460	0	0.996446	1178791000	15	True	True	1968.24	QRLASQACRTNPCLHGGR	0	4	_[DimethNter0]QRLASQAC[Carbamidomethyl (C)]RTNPC[Carbamidomethyl (C)]LHGGR_	7	20.5944	324802
3.2.220222.52329	20230928_apagotto_AP14bis_FXII_all1ul_inj_F12fastasearchpluscontaminants	2	20230928_224346	230928_EC1_apagotto_AP14bis_XII_Mpro_2.raw	3	40806	P00748	0.753	460	0	0.996446	1178791000	15	True	True	1968.24	QRLASQACRTNPCLHGGR	0	5	_[DimethNter0]QRLASQAC[Carbamidomethyl (C)]RTNPC[Carbamidomethyl (C)]LHGGR_	5	20.5944	218838
3.2.220222.52329	20230928_apagotto_AP14bis_FXII_all1ul_inj_F12fastasearchpluscontaminants	2	20230928_224346	230928_EC1_apagotto_AP14bis_XII_Mpro_2.raw	3	40806	P00748	0.753	460	0	0.996446	1178791000	15	True	True	2607.96	LASQACRTNPCLHGGRCLEVEGHR	0	5	_LASQAC[Carbamidomethyl (C)]RTNPC[Carbamidomethyl (C)]LHGGRC[Carbamidomethyl (C)]LEVEGHR_	8	24.2171	283719
3.2.220222.52329	20230928_apagotto_AP14bis_FXII_all1ul_inj_F12fastasearchpluscontaminants	2	20230928_224346	230928_EC1_apagotto_AP14bis_XII_Mpro_2.raw	3	40806	P00748	0.753	460	0	0.996446	1178791000	15	True	True	2607.96	LASQACRTNPCLHGGRCLEVEGHR	0	4	_LASQAC[Carbamidomethyl (C)]RTNPC[Carbamidomethyl (C)]LHGGRC[Carbamidomethyl (C)]LEVEGHR_	7	24.2171	301000
3.2.220222.52329	20230928_apagotto_AP14bis_FXII_all1ul_inj_F12fastasearchpluscontaminants	2	20230928_224346	230928_EC1_apagotto_AP14bis_XII_Mpro_2.raw	3	40806	P00748	0.753	460	0	0.996446	1178791000	15	True	True	2607.96	LASQACRTNPCLHGGRCLEVEGHR	0	6	_LASQAC[Carbamidomethyl (C)]RTNPC[Carbamidomethyl (C)]LHGGRC[Carbamidomethyl (C)]LEVEGHR_	7	24.2312	1499397
3.2.220222.52329	20230928_apagotto_AP14bis_FXII_all1ul_inj_F12fastasearchpluscontaminants	2	20230928_224346	230928_EC1_apagotto_AP14bis_XII_Mpro_2.raw	3	40806	P00748	0.753	460	0	0.996446	1178791000	15	True	True	2607.96	LASQACRTNPCLHGGRCLEVEGHR	0	5	_[DimethNter0]LASQAC[Carbamidomethyl (C)]RTNPC[Carbamidomethyl (C)]LHGGRC[Carbamidomethyl (C)]LEVEGHR_	2	26.1551	100364
3.2.220222.52329	20230928_apagotto_AP14bis_FXII_all1ul_inj_F12fastasearchpluscontaminants	2	20230928_224346	230928_EC1_apagotto_AP14bis_XII_Mpro_2.raw	3	40806	P00748	0.753	460	0	0.996446	1178791000	15	True	True	2607.96	LASQACRTNPCLHGGRCLEVEGHR	0	6	_[DimethNter0]LASQAC[Carbamidomethyl (C)]RTNPC[Carbamidomethyl (C)]LHGGRC[Carbamidomethyl (C)]LEVEGHR_	2	26.1678	85870.4
3.2.220222.52329	20230928_apagotto_AP14bis_FXII_all1ul_inj_F12fastasearchpluscontaminants	2	20230928_224346	230928_EC1_apagotto_AP14bis_XII_Mpro_2.raw	3	40806	P00748	0.753	460	0	0.996446	1178791000	15	True	True	1243.47	RLTLQGIISWG	0	2	_RLTLQGIISWG_	8	63.8977	268258
3.2.220222.52329	20230928_apagotto_AP14bis_FXII_all1ul_inj_F12fastasearchpluscontaminants	2	20230928_224346	230928_EC1_apagotto_AP14bis_XII_Mpro_2.raw	3	40806	P00748	0.753	460	0	0.996446	1178791000	15	True	True	1846.07	EAFSPVSYQHDLALLR	0	3	_EAFSPVSYQHDLALLR_	8	54.794	462050
3.2.220222.52329	20230928_apagotto_AP14bis_FXII_all1ul_inj_F12fastasearchpluscontaminants	2	20230928_224346	230928_EC1_apagotto_AP14bis_XII_Mpro_2.raw	3	40806	P00748	0.753	460	0	0.996446	1178791000	15	True	True	1846.07	EAFSPVSYQHDLALLR	0	2	_EAFSPVSYQHDLALLR_	5	54.794	265620
3.2.220222.52329	20230928_apagotto_AP14bis_FXII_all1ul_inj_F12fastasearchpluscontaminants	2	20230928_224346	230928_EC1_apagotto_AP14bis_XII_Mpro_2.raw	3	40806	P00748	0.753	460	0	0.996446	1178791000	15	True	True	2902.25	NWGLGGHAFCRNPDNDIRPWCFVLN	0.00396825	4	_NWGLGGHAFC[Carbamidomethyl (C)]RNPDNDIRPWC[Carbamidomethyl (C)]FVLN_	8	60.5788	470722
3.2.220222.52329	20230928_apagotto_AP14bis_FXII_all1ul_inj_F12fastasearchpluscontaminants	2	20230928_224346	230928_EC1_apagotto_AP14bis_XII_Mpro_2.raw	3	40806	P00748	0.753	460	0	0.996446	1178791000	15	True	True	1148.33	RGLSYRGLAR	0	3	_RGLSYRGLAR_	8	24.6341	239279
3.2.220222.52329	20230928_apagotto_AP14bis_FXII_all1ul_inj_F12fastasearchpluscontaminants	2	20230928_224346	230928_EC1_apagotto_AP14bis_XII_Mpro_2.raw	3	40806	P00748	0.753	460	0	0.996446	1178791000	15	True	True	1759.86	GDSGGPLVCEDQAAERR	0	3	_GDSGGPLVC[Carbamidomethyl (C)]EDQAAERR_	8	27.6458	256618
3.2.220222.52329	20230928_apagotto_AP14bis_FXII_all1ul_inj_F12fastasearchpluscontaminants	2	20230928_224346	230928_EC1_apagotto_AP14bis_XII_Mpro_2.raw	3	40806	P00748	0.753	460	0	0.996446	1178791000	15	True	True	2130.45	VVLTVTGEPCHFPFQYHR	0	4	_[DimethNter0]VVLTVTGEPC[Carbamidomethyl (C)]HFPFQYHR_	8	49.9721	153123
3.2.220222.52329	20230928_apagotto_AP14bis_FXII_all1ul_inj_F12fastasearchpluscontaminants	2	20230928_224346	230928_EC1_apagotto_AP14bis_XII_Mpro_2.raw	3	40806	P00748	0.753	460	0	0.996446	1178791000	15	True	True	1350.5	WYRTEQAAVAR	0	3	_[DimethNter0]WYRTEQAAVAR_	3	25.936	146313
3.2.220222.52329	20230928_apagotto_AP14bis_FXII_all1ul_inj_F12fastasearchpluscontaminants	2	20230928_224346	230928_EC1_apagotto_AP14bis_XII_Mpro_2.raw	3	40806	P00748	0.753	460	0	0.996446	1178791000	15	True	True	1158.35	CLEVEGHRLC	0	2	_C[Carbamidomethyl (C)]LEVEGHRLC[Carbamidomethyl (C)]_	8	35.1927	113006
3.2.220222.52329	20230928_apagotto_AP14bis_FXII_all1ul_inj_F12fastasearchpluscontaminants	2	20230928_224346	230928_EC1_apagotto_AP14bis_XII_Mpro_2.raw	3	40806	P00748	0.753	460	0	0.996446	1178791000	15	True	True	1540.74	FFHKNEIWYRT	0	3	_FFHK[DimethLys0]NEIWYRT_	8	36.7838	275406
3.2.220222.52329	20230928_apagotto_AP14bis_FXII_all1ul_inj_F12fastasearchpluscontaminants	2	20230928_224346	230928_EC1_apagotto_AP14bis_XII_Mpro_2.raw	3	40806	P00748	0.753	460	0	0.996446	1178791000	15	True	True	1221.24	TTPNFDQDQR	0	2	_TTPNFDQDQR_	6	26.2906	473777
3.2.220222.52329	20230928_apagotto_AP14bis_FXII_all1ul_inj_F12fastasearchpluscontaminants	2	20230928_224346	230928_EC1_apagotto_AP14bis_XII_Mpro_2.raw	3	40806	P00748	0.753	460	0	0.996446	1178791000	15	True	True	1221.24	TTPNFDQDQR	0	2	_[DimethNter0]TTPNFDQDQR_	2	29.0752	3149059
3.2.220222.52329	20230928_apagotto_AP14bis_FXII_all1ul_inj_F12fastasearchpluscontaminants	2	20230928_224346	230928_EC1_apagotto_AP14bis_XII_Mpro_2.raw	3	40806	P00748	0.753	460	0	0.996446	1178791000	15	True	True	2231.55	TNPCLHGGRCLEVEGHRLCH	0	3	_TNPC[Carbamidomethyl (C)]LHGGRC[Carbamidomethyl (C)]LEVEGHRLC[Carbamidomethyl (C)]H_	6	27.2168	429744
3.2.220222.52329	20230928_apagotto_AP14bis_FXII_all1ul_inj_F12fastasearchpluscontaminants	2	20230928_224346	230928_EC1_apagotto_AP14bis_XII_Mpro_2.raw	3	40806	P00748	0.753	460	0	0.996446	1178791000	15	True	True	2231.55	TNPCLHGGRCLEVEGHRLCH	0	4	_TNPC[Carbamidomethyl (C)]LHGGRC[Carbamidomethyl (C)]LEVEGHRLC[Carbamidomethyl (C)]H_	5	27.2168	1569227
3.2.220222.52329	20230928_apagotto_AP14bis_FXII_all1ul_inj_F12fastasearchpluscontaminants	2	20230928_224346	230928_EC1_apagotto_AP14bis_XII_Mpro_2.raw	3	40806	P00748	0.753	460	0	0.996446	1178791000	15	True	True	1211.38	LAWIREHTVS	0	2	_LAWIREHTVS_	7	36.1462	568619
3.2.220222.52329	20230928_apagotto_AP14bis_FXII_all1ul_inj_F12fastasearchpluscontaminants	2	20230928_224346	230928_EC1_apagotto_AP14bis_XII_Mpro_2.raw	3	40806	P00748	0.753	460	0	0.996446	1178791000	15	True	True	1211.38	LAWIREHTVS	0	3	_[DimethNter0]LAWIREHTVS_	1	37.9735	1360618
3.2.220222.52329	20230928_apagotto_AP14bis_FXII_all1ul_inj_F12fastasearchpluscontaminants	2	20230928_224346	230928_EC1_apagotto_AP14bis_XII_Mpro_2.raw	3	40806	P00748	0.753	460	0	0.996446	1178791000	15	True	True	1211.38	LAWIREHTVS	0	3	_LAWIREHTVS_	1	36.1462	290464
3.2.220222.52329	20230928_apagotto_AP14bis_FXII_all1ul_inj_F12fastasearchpluscontaminants	2	20230928_224346	230928_EC1_apagotto_AP14bis_XII_Mpro_2.raw	3	40806	P00748	0.753	460	0	0.996446	1178791000	15	True	True	1060.19	LASQACRTNP	0	2	_LASQAC[Carbamidomethyl (C)]RTNP_	7	20.5944	1122348
3.2.220222.52329	20230928_apagotto_AP14bis_FXII_all1ul_inj_F12fastasearchpluscontaminants	2	20230928_224346	230928_EC1_apagotto_AP14bis_XII_Mpro_2.raw	3	40806	P00748	0.753	460	0	0.996446	1178791000	15	True	True	2698	AEEHTVVLTVTGEPCHFPFQYHR	0	4	_[DimethNter0]AEEHTVVLTVTGEPC[Carbamidomethyl (C)]HFPFQYHR_	7	48.0424	990154
3.2.220222.52329	20230928_apagotto_AP14bis_FXII_all1ul_inj_F12fastasearchpluscontaminants	2	20230928_224346	230928_EC1_apagotto_AP14bis_XII_Mpro_2.raw	3	40806	P00748	0.753	460	0	0.996446	1178791000	15	True	True	1840.11	RLASQACRTNPCLHGGR	0	4	_RLASQAC[Carbamidomethyl (C)]RTNPC[Carbamidomethyl (C)]LHGGR_	7	20.1016	552328
3.2.220222.52329	20230928_apagotto_AP14bis_FXII_all1ul_inj_F12fastasearchpluscontaminants	2	20230928_224346	230928_EC1_apagotto_AP14bis_XII_Mpro_2.raw	3	40806	P00748	0.753	460	0	0.996446	1178791000	15	True	True	1840.11	RLASQACRTNPCLHGGR	0	4	_[DimethNter0]RLASQAC[Carbamidomethyl (C)]RTNPC[Carbamidomethyl (C)]LHGGR_	4	20.3291	798955
3.2.220222.52329	20230928_apagotto_AP14bis_FXII_all1ul_inj_F12fastasearchpluscontaminants	2	20230928_224346	230928_EC1_apagotto_AP14bis_XII_Mpro_2.raw	3	40806	P00748	0.753	460	0	0.996446	1178791000	15	True	True	1657.78	NWGLGGHAFCRNPDN	0	3	_NWGLGGHAFC[Carbamidomethyl (C)]RNPDN_	7	37.9735	584871
3.2.220222.52329	20230928_apagotto_AP14bis_FXII_all1ul_inj_F12fastasearchpluscontaminants	2	20230928_224346	230928_EC1_apagotto_AP14bis_XII_Mpro_2.raw	3	40806	P00748	0.753	460	0	0.996446	1178791000	15	True	True	1657.78	NWGLGGHAFCRNPDN	0	2	_NWGLGGHAFC[Carbamidomethyl (C)]RNPDN_	6	38.0625	710754
3.2.220222.52329	20230928_apagotto_AP14bis_FXII_all1ul_inj_F12fastasearchpluscontaminants	2	20230928_224346	230928_EC1_apagotto_AP14bis_XII_Mpro_2.raw	3	40806	P00748	0.753	460	0	0.996446	1178791000	15	True	True	816.926	GPLSCGQR	0	2	_GPLSC[Carbamidomethyl (C)]GQR_	7	21.1176	553583
3.2.220222.52329	20230928_apagotto_AP14bis_FXII_all1ul_inj_F12fastasearchpluscontaminants	2	20230928_224346	230928_EC1_apagotto_AP14bis_XII_Mpro_2.raw	3	40806	P00748	0.753	460	0	0.996446	1178791000	15	True	True	1819.02	TVTGEPCHFPFQYHR	0	3	_TVTGEPC[Carbamidomethyl (C)]HFPFQYHR_	7	38.0231	443910
3.2.220222.52329	20230928_apagotto_AP14bis_FXII_all1ul_inj_F12fastasearchpluscontaminants	2	20230928_224346	230928_EC1_apagotto_AP14bis_XII_Mpro_2.raw	3	40806	P00748	0.753	460	0	0.996446	1178791000	15	True	True	1819.02	TVTGEPCHFPFQYHR	0	4	_[DimethNter0]TVTGEPC[Carbamidomethyl (C)]HFPFQYHR_	6	38.8767	90336.4
3.2.220222.52329	20230928_apagotto_AP14bis_FXII_all1ul_inj_F12fastasearchpluscontaminants	2	20230928_224346	230928_EC1_apagotto_AP14bis_XII_Mpro_2.raw	3	40806	P00748	0.753	460	0	0.996446	1178791000	15	True	True	1819.02	TVTGEPCHFPFQYHR	0	3	_[DimethNter0]TVTGEPC[Carbamidomethyl (C)]HFPFQYHR_	4	38.8767	96235.2
3.2.220222.52329	20230928_apagotto_AP14bis_FXII_all1ul_inj_F12fastasearchpluscontaminants	2	20230928_224346	230928_EC1_apagotto_AP14bis_XII_Mpro_2.raw	3	40806	P00748	0.753	460	0	0.996446	1178791000	15	True	True	2119.37	FHKNEIWYRTEQAAVAR	0	4	_FHK[DimethLys0]NEIWYRTEQAAVAR_	7	34.1889	409023
3.2.220222.52329	20230928_apagotto_AP14bis_FXII_all1ul_inj_F12fastasearchpluscontaminants	2	20230928_224346	230928_EC1_apagotto_AP14bis_XII_Mpro_2.raw	3	40806	P00748	0.753	460	0	0.996446	1178791000	15	True	True	3301.82	PSGPHCLCPQHLTGNHCQKEKCFEPQLLR	0	6	_PSGPHC[Carbamidomethyl (C)]LC[Carbamidomethyl (C)]PQHLTGNHC[Carbamidomethyl (C)]QK[DimethLys0]EK[DimethLys0]C[Carbamidomethyl (C)]FEPQLLR_	7	34.2783	948816
3.2.220222.52329	20230928_apagotto_AP14bis_FXII_all1ul_inj_F12fastasearchpluscontaminants	2	20230928_224346	230928_EC1_apagotto_AP14bis_XII_Mpro_2.raw	3	40806	P00748	0.753	460	0	0.996446	1178791000	15	True	True	3301.82	PSGPHCLCPQHLTGNHCQKEKCFEPQLLR	0	5	_PSGPHC[Carbamidomethyl (C)]LC[Carbamidomethyl (C)]PQHLTGNHC[Carbamidomethyl (C)]QK[DimethLys0]EK[DimethLys0]C[Carbamidomethyl (C)]FEPQLLR_	4	36.7838	772299
3.2.220222.52329	20230928_apagotto_AP14bis_FXII_all1ul_inj_F12fastasearchpluscontaminants	2	20230928_224346	230928_EC1_apagotto_AP14bis_XII_Mpro_2.raw	3	40806	P00748	0.753	460	0	0.996446	1178791000	15	True	True	3301.82	PSGPHCLCPQHLTGNHCQKEKCFEPQLLR	0	7	_PSGPHC[Carbamidomethyl (C)]LC[Carbamidomethyl (C)]PQHLTGNHC[Carbamidomethyl (C)]QK[DimethLys0]EK[DimethLys0]C[Carbamidomethyl (C)]FEPQLLR_	1	34.3284	272461
3.2.220222.52329	20230928_apagotto_AP14bis_FXII_all1ul_inj_F12fastasearchpluscontaminants	2	20230928_224346	230928_EC1_apagotto_AP14bis_XII_Mpro_2.raw	3	40806	P00748	0.753	460	0	0.996446	1178791000	15	True	True	3301.82	PSGPHCLCPQHLTGNHCQKEKCFEPQLLR	0	4	_PSGPHC[Carbamidomethyl (C)]LC[Carbamidomethyl (C)]PQHLTGNHC[Carbamidomethyl (C)]QK[DimethLys0]EK[DimethLys0]C[Carbamidomethyl (C)]FEPQLLR_	1	34.3784	160993
3.2.220222.52329	20230928_apagotto_AP14bis_FXII_all1ul_inj_F12fastasearchpluscontaminants	2	20230928_224346	230928_EC1_apagotto_AP14bis_XII_Mpro_2.raw	3	40806	P00748	0.753	460	0	0.996446	1178791000	15	True	True	2912.16	LHEAFSPVSYQHDLALLRLQEDADGS	0	3	_LHEAFSPVSYQHDLALLRLQEDADGS_	7	55.7842	365287
3.2.220222.52329	20230928_apagotto_AP14bis_FXII_all1ul_inj_F12fastasearchpluscontaminants	2	20230928_224346	230928_EC1_apagotto_AP14bis_XII_Mpro_2.raw	3	40806	P00748	0.753	460	0	0.996446	1178791000	15	True	True	2912.16	LHEAFSPVSYQHDLALLRLQEDADGS	0	4	_LHEAFSPVSYQHDLALLRLQEDADGS_	5	55.7842	152893
3.2.220222.52329	20230928_apagotto_AP14bis_FXII_all1ul_inj_F12fastasearchpluscontaminants	2	20230928_224346	230928_EC1_apagotto_AP14bis_XII_Mpro_2.raw	3	40806	P00748	0.753	460	0	0.996446	1178791000	15	True	True	2271.45	GRPGPQPWCATTPNFDQDQR	0	3	_GRPGPQPWC[Carbamidomethyl (C)]ATTPNFDQDQR_	7	40.6722	592896
3.2.220222.52329	20230928_apagotto_AP14bis_FXII_all1ul_inj_F12fastasearchpluscontaminants	2	20230928_224346	230928_EC1_apagotto_AP14bis_XII_Mpro_2.raw	3	40806	P00748	0.753	460	0	0.996446	1178791000	15	True	True	2271.45	GRPGPQPWCATTPNFDQDQR	0	3	_[DimethNter0]GRPGPQPWC[Carbamidomethyl (C)]ATTPNFDQDQR_	1	40.8215	263767
3.2.220222.52329	20230928_apagotto_AP14bis_FXII_all1ul_inj_F12fastasearchpluscontaminants	2	20230928_224346	230928_EC1_apagotto_AP14bis_XII_Mpro_2.raw	3	40806	P00748	0.753	460	0	0.996446	1178791000	15	True	True	1231.38	TTLSGAPCQPWA	0	2	_TTLSGAPC[Carbamidomethyl (C)]QPWA_	7	48.0912	255643
3.2.220222.52329	20230928_apagotto_AP14bis_FXII_all1ul_inj_F12fastasearchpluscontaminants	2	20230928_224346	230928_EC1_apagotto_AP14bis_XII_Mpro_2.raw	3	40806	P00748	0.753	460	0	0.996446	1178791000	15	True	True	1546.62	DSGGPLVCEDQAAER	0	2	_DSGGPLVC[Carbamidomethyl (C)]EDQAAER_	7	32.3482	182001
3.2.220222.52329	20230928_apagotto_AP14bis_FXII_all1ul_inj_F12fastasearchpluscontaminants	2	20230928_224346	230928_EC1_apagotto_AP14bis_XII_Mpro_2.raw	3	40806	P00748	0.753	460	0	0.996446	1178791000	15	True	True	1214.31	VDTKASCYDGR	0	3	_VDTK[DimethLys0]ASC[Carbamidomethyl (C)]YDGR_	7	20.5944	178824
3.2.220222.52329	20230928_apagotto_AP14bis_FXII_all1ul_inj_F12fastasearchpluscontaminants	2	20230928_224346	230928_EC1_apagotto_AP14bis_XII_Mpro_2.raw	3	40806	P00748	0.753	460	0	0.996446	1178791000	15	True	True	1906.02	ACQGDSGGPLVCEDQAAER	0	2	_AC[Carbamidomethyl (C)]QGDSGGPLVC[Carbamidomethyl (C)]EDQAAER_	7	31.0865	85788.5
3.2.220222.52329	20230928_apagotto_AP14bis_FXII_all1ul_inj_F12fastasearchpluscontaminants	2	20230928_224346	230928_EC1_apagotto_AP14bis_XII_Mpro_2.raw	3	40806	P00748	0.753	460	0	0.996446	1178791000	15	True	True	1906.02	ACQGDSGGPLVCEDQAAER	0	3	_[DimethNter0]AC[Carbamidomethyl (C)]QGDSGGPLVC[Carbamidomethyl (C)]EDQAAER_	6	31.8982	108972
3.2.220222.52329	20230928_apagotto_AP14bis_FXII_all1ul_inj_F12fastasearchpluscontaminants	2	20230928_224346	230928_EC1_apagotto_AP14bis_XII_Mpro_2.raw	3	40806	P00748	0.753	460	0	0.996446	1178791000	15	True	True	1906.02	ACQGDSGGPLVCEDQAAER	0	2	_[DimethNter0]AC[Carbamidomethyl (C)]QGDSGGPLVC[Carbamidomethyl (C)]EDQAAER_	5	31.8134	175655
3.2.220222.52329	20230928_apagotto_AP14bis_FXII_all1ul_inj_F12fastasearchpluscontaminants	2	20230928_224346	230928_EC1_apagotto_AP14bis_XII_Mpro_2.raw	3	40806	P00748	0.753	460	0	0.996446	1178791000	15	True	True	1305.45	SYRLHEAFSPV	0	3	_SYRLHEAFSPV_	7	38.7309	97037.6
3.2.220222.52329	20230928_apagotto_AP14bis_FXII_all1ul_inj_F12fastasearchpluscontaminants	2	20230928_224346	230928_EC1_apagotto_AP14bis_XII_Mpro_2.raw	3	40806	P00748	0.753	460	0	0.996446	1178791000	15	True	True	1041.12	EQPPSLTRN	0	2	_EQPPSLTRN_	7	25.3313	76667.6
3.2.220222.52329	20230928_apagotto_AP14bis_FXII_all1ul_inj_F12fastasearchpluscontaminants	2	20230928_224346	230928_EC1_apagotto_AP14bis_XII_Mpro_2.raw	3	40806	P00748	0.753	460	0	0.996446	1178791000	15	True	True	1178.41	LRKSLSSMTR	0	2	_LRK[DimethLys0]SLSSMTR_	4	20.919	56071820
3.2.220222.52329	20230928_apagotto_AP14bis_FXII_all1ul_inj_F12fastasearchpluscontaminants	2	20230928_224346	230928_EC1_apagotto_AP14bis_XII_Mpro_2.raw	3	40806	P00748	0.753	460	0	0.996446	1178791000	15	True	True	1178.41	LRKSLSSMTR	0	3	_[DimethNter0]LRK[DimethLys0]SLSSMTR_	3	21.1176	3021776
3.2.220222.52329	20230928_apagotto_AP14bis_FXII_all1ul_inj_F12fastasearchpluscontaminants	2	20230928_224346	230928_EC1_apagotto_AP14bis_XII_Mpro_2.raw	3	40806	P00748	0.753	460	0	0.996446	1178791000	15	True	True	1178.41	LRKSLSSMTR	0	3	_LRK[DimethLys0]SLSSM[Oxidation (M)]TR_	1	19.3578	8185657
3.2.220222.52329	20230928_apagotto_AP14bis_FXII_all1ul_inj_F12fastasearchpluscontaminants	2	20230928_224346	230928_EC1_apagotto_AP14bis_XII_Mpro_2.raw	3	40806	P00748	0.753	460	0	0.996446	1178791000	15	True	True	2172.43	TEQAAVARCQCKGPDAHCQR	0	4	_TEQAAVARC[Carbamidomethyl (C)]QC[Carbamidomethyl (C)]K[DimethLys0]GPDAHC[Carbamidomethyl (C)]QR_	5	19.6063	54497990
3.2.220222.52329	20230928_apagotto_AP14bis_FXII_all1ul_inj_F12fastasearchpluscontaminants	2	20230928_224346	230928_EC1_apagotto_AP14bis_XII_Mpro_2.raw	3	40806	P00748	0.753	460	0	0.996446	1178791000	15	True	True	2172.43	TEQAAVARCQCKGPDAHCQR	0	5	_TEQAAVARC[Carbamidomethyl (C)]QC[Carbamidomethyl (C)]K[DimethLys0]GPDAHC[Carbamidomethyl (C)]QR_	5	19.6561	2414286
3.2.220222.52329	20230928_apagotto_AP14bis_FXII_all1ul_inj_F12fastasearchpluscontaminants	2	20230928_224346	230928_EC1_apagotto_AP14bis_XII_Mpro_2.raw	3	40806	P00748	0.753	460	0	0.996446	1178791000	15	True	True	2172.43	TEQAAVARCQCKGPDAHCQR	0	3	_TEQAAVARC[Carbamidomethyl (C)]QC[Carbamidomethyl (C)]K[DimethLys0]GPDAHC[Carbamidomethyl (C)]QR_	3	19.6063	16787130
3.2.220222.52329	20230928_apagotto_AP14bis_FXII_all1ul_inj_F12fastasearchpluscontaminants	2	20230928_224346	230928_EC1_apagotto_AP14bis_XII_Mpro_2.raw	3	40806	P00748	0.753	460	0	0.996446	1178791000	15	True	True	1413.63	LASQACRTNPCLH	0	2	_LASQAC[Carbamidomethyl (C)]RTNPC[Carbamidomethyl (C)]LH_	3	22.5571	24219410
3.2.220222.52329	20230928_apagotto_AP14bis_FXII_all1ul_inj_F12fastasearchpluscontaminants	2	20230928_224346	230928_EC1_apagotto_AP14bis_XII_Mpro_2.raw	3	40806	P00748	0.753	460	0	0.996446	1178791000	15	True	True	1413.63	LASQACRTNPCLH	0	3	_[DimethNter0]LASQAC[Carbamidomethyl (C)]RTNPC[Carbamidomethyl (C)]LH_	2	23.2747	527853
3.2.220222.52329	20230928_apagotto_AP14bis_FXII_all1ul_inj_F12fastasearchpluscontaminants	2	20230928_224346	230928_EC1_apagotto_AP14bis_XII_Mpro_2.raw	3	40806	P00748	0.753	460	0	0.996446	1178791000	15	True	True	1413.63	LASQACRTNPCLH	0	2	_[DimethNter0]LASQAC[Carbamidomethyl (C)]RTNPC[Carbamidomethyl (C)]LH_	1	23.3041	191015
3.2.220222.52329	20230928_apagotto_AP14bis_FXII_all1ul_inj_F12fastasearchpluscontaminants	2	20230928_224346	230928_EC1_apagotto_AP14bis_XII_Mpro_2.raw	3	40806	P00748	0.753	460	0	0.996446	1178791000	15	True	True	2554.98	VVGGLVALRGAHPYIAALYWGHSF	0	3	_VVGGLVALRGAHPYIAALYWGHSF_	6	63.4502	1234980
3.2.220222.52329	20230928_apagotto_AP14bis_FXII_all1ul_inj_F12fastasearchpluscontaminants	2	20230928_224346	230928_EC1_apagotto_AP14bis_XII_Mpro_2.raw	3	40806	P00748	0.753	460	0	0.996446	1178791000	15	True	True	2281.63	HLTGNHCQKEKCFEPQLLR	0	5	_[DimethNter0]HLTGNHC[Carbamidomethyl (C)]QK[DimethLys0]EK[DimethLys0]C[Carbamidomethyl (C)]FEPQLLR_	6	29.1931	559547
3.2.220222.52329	20230928_apagotto_AP14bis_FXII_all1ul_inj_F12fastasearchpluscontaminants	2	20230928_224346	230928_EC1_apagotto_AP14bis_XII_Mpro_2.raw	3	40806	P00748	0.753	460	0	0.996446	1178791000	15	True	True	2281.63	HLTGNHCQKEKCFEPQLLR	0	4	_[DimethNter0]HLTGNHC[Carbamidomethyl (C)]QK[DimethLys0]EK[DimethLys0]C[Carbamidomethyl (C)]FEPQLLR_	3	29.1931	1752873
3.2.220222.52329	20230928_apagotto_AP14bis_FXII_all1ul_inj_F12fastasearchpluscontaminants	2	20230928_224346	230928_EC1_apagotto_AP14bis_XII_Mpro_2.raw	3	40806	P00748	0.753	460	0	0.996446	1178791000	15	True	True	963.072	LASQACRTN	0	2	_LASQAC[Carbamidomethyl (C)]RTN_	6	19.4569	795453
3.2.220222.52329	20230928_apagotto_AP14bis_FXII_all1ul_inj_F12fastasearchpluscontaminants	2	20230928_224346	230928_EC1_apagotto_AP14bis_XII_Mpro_2.raw	3	40806	P00748	0.753	460	0	0.996446	1178791000	15	True	True	1749.98	HSCEPCQTLAVRSYR	0	3	_HSC[Carbamidomethyl (C)]EPC[Carbamidomethyl (C)]QTLAVRSYR_	6	27.6948	479354
3.2.220222.52329	20230928_apagotto_AP14bis_FXII_all1ul_inj_F12fastasearchpluscontaminants	2	20230928_224346	230928_EC1_apagotto_AP14bis_XII_Mpro_2.raw	3	40806	P00748	0.753	460	0	0.996446	1178791000	15	True	True	3174.47	SYRLHEAFSPVSYQHDLALLRLQEDAD	0	4	_SYRLHEAFSPVSYQHDLALLRLQEDAD_	6	54.2012	865357
3.2.220222.52329	20230928_apagotto_AP14bis_FXII_all1ul_inj_F12fastasearchpluscontaminants	2	20230928_224346	230928_EC1_apagotto_AP14bis_XII_Mpro_2.raw	3	40806	P00748	0.753	460	0	0.996446	1178791000	15	True	True	3174.47	SYRLHEAFSPVSYQHDLALLRLQEDAD	0	3	_SYRLHEAFSPVSYQHDLALLRLQEDAD_	2	54.2503	869419
3.2.220222.52329	20230928_apagotto_AP14bis_FXII_all1ul_inj_F12fastasearchpluscontaminants	2	20230928_224346	230928_EC1_apagotto_AP14bis_XII_Mpro_2.raw	3	40806	P00748	0.753	460	0	0.996446	1178791000	15	True	True	1797.99	FFHKNEIWYRTEQ	0.00203666	3	_FFHK[DimethLys0]NEIWYRTEQ_	6	36.0464	268876
3.2.220222.52329	20230928_apagotto_AP14bis_FXII_all1ul_inj_F12fastasearchpluscontaminants	2	20230928_224346	230928_EC1_apagotto_AP14bis_XII_Mpro_2.raw	3	40806	P00748	0.753	460	0	0.996446	1178791000	15	True	True	3231.52	SYRLHEAFSPVSYQHDLALLRLQEDADG	0	4	_SYRLHEAFSPVSYQHDLALLRLQEDADG_	6	53.812	246154
3.2.220222.52329	20230928_apagotto_AP14bis_FXII_all1ul_inj_F12fastasearchpluscontaminants	2	20230928_224346	230928_EC1_apagotto_AP14bis_XII_Mpro_2.raw	3	40806	P00748	0.753	460	0	0.996446	1178791000	15	True	True	1744.98	PDNDIRPWCFVLNR	0	3	_PDNDIRPWC[Carbamidomethyl (C)]FVLNR_	6	56.6161	219943
3.2.220222.52329	20230928_apagotto_AP14bis_FXII_all1ul_inj_F12fastasearchpluscontaminants	2	20230928_224346	230928_EC1_apagotto_AP14bis_XII_Mpro_2.raw	3	40806	P00748	0.753	460	0	0.996446	1178791000	15	True	True	1662.9	PCLHGGRCLEVEGHR	0	4	_PC[Carbamidomethyl (C)]LHGGRC[Carbamidomethyl (C)]LEVEGHR_	5	21.8056	400239
3.2.220222.52329	20230928_apagotto_AP14bis_FXII_all1ul_inj_F12fastasearchpluscontaminants	2	20230928_224346	230928_EC1_apagotto_AP14bis_XII_Mpro_2.raw	3	40806	P00748	0.753	460	0	0.996446	1178791000	15	True	True	1662.9	PCLHGGRCLEVEGHR	0	3	_PC[Carbamidomethyl (C)]LHGGRC[Carbamidomethyl (C)]LEVEGHR_	5	21.8056	268657
3.2.220222.52329	20230928_apagotto_AP14bis_FXII_all1ul_inj_F12fastasearchpluscontaminants	2	20230928_224346	230928_EC1_apagotto_AP14bis_XII_Mpro_2.raw	3	40806	P00748	0.753	460	0	0.996446	1178791000	15	True	True	2252.56	RLHEAFSPVSYQHDLALLR	0	4	_RLHEAFSPVSYQHDLALLR_	6	47.1197	160981
3.2.220222.52329	20230928_apagotto_AP14bis_FXII_all1ul_inj_F12fastasearchpluscontaminants	2	20230928_224346	230928_EC1_apagotto_AP14bis_XII_Mpro_2.raw	3	40806	P00748	0.753	460	0	0.996446	1178791000	15	True	True	1490.74	RLTLQGIISWGSGC	0	2	_RLTLQGIISWGSGC[Carbamidomethyl (C)]_	6	64.0458	157833
3.2.220222.52329	20230928_apagotto_AP14bis_FXII_all1ul_inj_F12fastasearchpluscontaminants	2	20230928_224346	230928_EC1_apagotto_AP14bis_XII_Mpro_2.raw	3	40806	P00748	0.753	460	0	0.996446	1178791000	15	True	True	1543.67	NWGLGGHAFCRNPD	0	3	_NWGLGGHAFC[Carbamidomethyl (C)]RNPD_	6	38.9201	132837
3.2.220222.52329	20230928_apagotto_AP14bis_FXII_all1ul_inj_F12fastasearchpluscontaminants	2	20230928_224346	230928_EC1_apagotto_AP14bis_XII_Mpro_2.raw	3	40806	P00748	0.753	460	0	0.996446	1178791000	15	True	True	1543.67	NWGLGGHAFCRNPD	0	2	_NWGLGGHAFC[Carbamidomethyl (C)]RNPD_	1	38.9432	149760
3.2.220222.52329	20230928_apagotto_AP14bis_FXII_all1ul_inj_F12fastasearchpluscontaminants	2	20230928_224346	230928_EC1_apagotto_AP14bis_XII_Mpro_2.raw	3	40806	P00748	0.753	460	0	0.996446	1178791000	15	True	True	994.116	FPFQYHR	0	2	_FPFQYHR_	6	36.0965	126996
3.2.220222.52329	20230928_apagotto_AP14bis_FXII_all1ul_inj_F12fastasearchpluscontaminants	2	20230928_224346	230928_EC1_apagotto_AP14bis_XII_Mpro_2.raw	3	40806	P00748	0.753	460	0	0.996446	1178791000	15	True	True	1022.12	SYRLHEAF	0.00203666	2	_SYRLHEAF_	6	31.77	192811
3.2.220222.52329	20230928_apagotto_AP14bis_FXII_all1ul_inj_F12fastasearchpluscontaminants	2	20230928_224346	230928_EC1_apagotto_AP14bis_XII_Mpro_2.raw	3	40806	P00748	0.753	460	0	0.996446	1178791000	15	True	True	2744.1	SYRLHEAFSPVSYQHDLALLRLQ	0	4	_SYRLHEAFSPVSYQHDLALLRLQ_	6	54.744	100739
3.2.220222.52329	20230928_apagotto_AP14bis_FXII_all1ul_inj_F12fastasearchpluscontaminants	2	20230928_224346	230928_EC1_apagotto_AP14bis_XII_Mpro_2.raw	3	40806	P00748	0.753	460	0	0.996446	1178791000	15	True	True	1744.94	ASCYDGRGLSYRGLAR	0	4	_ASC[Carbamidomethyl (C)]YDGRGLSYRGLAR_	6	31.4359	52197.3
3.2.220222.52329	20230928_apagotto_AP14bis_FXII_all1ul_inj_F12fastasearchpluscontaminants	2	20230928_224346	230928_EC1_apagotto_AP14bis_XII_Mpro_2.raw	3	40806	P00748	0.753	460	0	0.996446	1178791000	15	True	True	2021.11	DACQGDSGGPLVCEDQAAER	0	2	_[DimethNter0]DAC[Carbamidomethyl (C)]QGDSGGPLVC[Carbamidomethyl (C)]EDQAAER_	6	34.5264	0
3.2.220222.52329	20230928_apagotto_AP14bis_FXII_all1ul_inj_F12fastasearchpluscontaminants	2	20230928_224346	230928_EC1_apagotto_AP14bis_XII_Mpro_2.raw	3	40806	P00748	0.753	460	0	0.996446	1178791000	15	True	True	1662.88	LTLQGIISWGSGCGDR	0	2	_LTLQGIISWGSGC[Carbamidomethyl (C)]GDR_	5	63.9958	4706116
3.2.220222.52329	20230928_apagotto_AP14bis_FXII_all1ul_inj_F12fastasearchpluscontaminants	2	20230928_224346	230928_EC1_apagotto_AP14bis_XII_Mpro_2.raw	3	40806	P00748	0.753	460	0	0.996446	1178791000	15	True	True	3433.01	MPSGPHCLCPQHLTGNHCQKEKCFEPQLLR	0	5	_MPSGPHC[Carbamidomethyl (C)]LC[Carbamidomethyl (C)]PQHLTGNHC[Carbamidomethyl (C)]QK[DimethLys0]EK[DimethLys0]C[Carbamidomethyl (C)]FEPQLLR_	5	35.9477	808150
3.2.220222.52329	20230928_apagotto_AP14bis_FXII_all1ul_inj_F12fastasearchpluscontaminants	2	20230928_224346	230928_EC1_apagotto_AP14bis_XII_Mpro_2.raw	3	40806	P00748	0.753	460	0	0.996446	1178791000	15	True	True	3433.01	MPSGPHCLCPQHLTGNHCQKEKCFEPQLLR	0	6	_MPSGPHC[Carbamidomethyl (C)]LC[Carbamidomethyl (C)]PQHLTGNHC[Carbamidomethyl (C)]QK[DimethLys0]EK[DimethLys0]C[Carbamidomethyl (C)]FEPQLLR_	2	35.997	221960
3.2.220222.52329	20230928_apagotto_AP14bis_FXII_all1ul_inj_F12fastasearchpluscontaminants	2	20230928_224346	230928_EC1_apagotto_AP14bis_XII_Mpro_2.raw	3	40806	P00748	0.753	460	0	0.996446	1178791000	15	True	True	2988.3	SYRLHEAFSPVSYQHDLALLRLQED	0	4	_SYRLHEAFSPVSYQHDLALLRLQED_	5	54.2993	744257
3.2.220222.52329	20230928_apagotto_AP14bis_FXII_all1ul_inj_F12fastasearchpluscontaminants	2	20230928_224346	230928_EC1_apagotto_AP14bis_XII_Mpro_2.raw	3	40806	P00748	0.753	460	0	0.996446	1178791000	15	True	True	2988.3	SYRLHEAFSPVSYQHDLALLRLQED	0	3	_SYRLHEAFSPVSYQHDLALLRLQED_	1	54.2993	232068
3.2.220222.52329	20230928_apagotto_AP14bis_FXII_all1ul_inj_F12fastasearchpluscontaminants	2	20230928_224346	230928_EC1_apagotto_AP14bis_XII_Mpro_2.raw	3	40806	P00748	0.753	460	0	0.996446	1178791000	15	True	True	1282.46	AKREQPPSLTR	0	3	_[DimethNter0]AK[DimethLys0]REQPPSLTR_	5	20.7402	667667
3.2.220222.52329	20230928_apagotto_AP14bis_FXII_all1ul_inj_F12fastasearchpluscontaminants	2	20230928_224346	230928_EC1_apagotto_AP14bis_XII_Mpro_2.raw	3	40806	P00748	0.753	460	0	0.996446	1178791000	15	True	True	4490.02	SYRLHEAFSPVSYQHDLALLRLQEDADGSCALLSPYVQPV	0.00203666	5	_SYRLHEAFSPVSYQHDLALLRLQEDADGSC[Carbamidomethyl (C)]ALLSPYVQPV_	5	63.4012	353752
3.2.220222.52329	20230928_apagotto_AP14bis_FXII_all1ul_inj_F12fastasearchpluscontaminants	2	20230928_224346	230928_EC1_apagotto_AP14bis_XII_Mpro_2.raw	3	40806	P00748	0.753	460	0	0.996446	1178791000	15	True	True	4490.02	SYRLHEAFSPVSYQHDLALLRLQEDADGSCALLSPYVQPV	0.00203666	4	_SYRLHEAFSPVSYQHDLALLRLQEDADGSC[Carbamidomethyl (C)]ALLSPYVQPV_	4	63.4012	1211828
[truncated: 2,760 more rows]

## Sheet: FXII_cleavage_sites
P1prime_aa	cleavage_site	P1_peptide_sequence	count_CTRL_t0_1	count_CTRL_t0_2	count_CTRL_t0_3	count_CTRL_t3_1	count_CTRL_t3_2	count_CTRL_t3_3	count_Mpro_1	count_Mpro_2	count_Mpro_3
[truncated: 21 more rows]
