# Supplementary material for: The Main protease (Mpro) from SARS-CoV-2 triggers plasma clotting in vitro by activating coagulation factors VII and FXII
Source: Research Square preprint supplement (doi:10.21203/rs.3.rs-4959212/v1), 2024-11-13
Supplement: Supplementary file 4 [file 9676cc155691bbe2e1708525.xlsx]

## Sheet: Table legend
Table legend
Mpro_5min	Detected cleavage sequences obtained by incubating native standardize lysate with Mpro for 5min are reported in the table. Cleavage sequences from 3 independent replicates covering positions P8-P8' are shown.
Mpro_30min	Detected cleavage sequences obtained by incubating native standardize lysate with Mpro for 30min are reported in the table. Cleavage sequences from 3 independent replicates covering positions P8-P8' are shown.
Mpro_4hrs	Detected cleavage sequences obtained by incubating native standardize lysate with Mpro for 4hrs are reported in the table. Cleavage sequences from 3 independent replicates covering positions P8-P8' are shown.
Mpro_24hrs	Detected cleavage sequences obtained by incubating native standardize lysate with Mpro for 24hrs are reported in the table. Cleavage sequences from 3 independent replicates covering positions P8-P8' are shown.
ctrl_30min	Detected cleavage sequences obtained by incubating native standardize lysate without protease for 30min are reported in the table. Cleavage sequences from 3 independent replicates covering positions P8-P8' are shown.
ctrl_24hrs	Detected cleavage sequences obtained by incubating native standardize lysate without protease for 24hrs are reported in the table. Cleavage sequences from 3 independent replicates covering positions P8-P8' are shown.
spec_Mpro_5min	Positional amino acid enrichment for Mpro with 5min of incubation with native standardize lysate. Statistical analysis (FC and pvalue) is calculated from three independent replicates.
spec_Mpro_30min	Positional amino acid enrichment for Mpro with 30min of incubation with native standardize lysate. Statistical analysis (FC and pvalue) is calculated from three independent replicates.
spec_Mpro_4hrs	Positional amino acid enrichment for Mpro with 4hrs of incubation with native standardize lysate. Statistical analysis (FC and pvalue) is calculated from three independent replicates.
spec_Mpro_24hrs	Positional amino acid enrichment for Mpro with 24hrs of incubation with native standardize lysate. Statistical analysis (FC and pvalue) is calculated from three independent replicates.
NOTE related to specificity table
The table includes positions P8-P8' covering 20 natural aminoacids in alphabetical order (ID).
All experiments were performed in triplicates, so for each protease there are 3 specificity columns (specificity_1, specificity_2, specificity_3) and 3 control (specificty_CTRL_1, specificity_CTRL_2, specificity_CTRL_3) columns with the calculated corresponding medians (median_specificity, median_CTRL_specificity).
The median values were used to calculate the FC, p-value (pval) and the adjusted p-value (adj_p_val) with Benjamini-Hochberg correction.
The FC significant shows a fold change positional enrichment with an adjusted p-value <0.01.
The last column FC significant positive shows only positive fold change positional enrichment with an adjusted p-value<0.01 for respective aminoacids in the detected substrate sequences.

## Sheet: MPro_5min
Rep_1	Rep_2	Rep_3
KRRALAAPAAEEKEEA	KRRALAAPAAEEKEEA	KRRALAAPAAEEKEEA
KSLKFATEAAITILRI	KSLKFATEAAITILRI	KSLKFATEAAITILRI
KAEVARAQAALAVNIS	RAQSREQLAALKKHHE	KAEVARAQAALAVNIS
RAQSREQLAALKKHHE	APVAAATTAAPAAAAA	RAQSREQLAALKKHHE
APVAAATTAAPAAAAA	EEKGSPLNAAPYGIES	APVAAATTAAPAAAAA
EEKGSPLNAAPYGIES	SPSPSQLQAAQIQVQH	EEKGSPLNAAPYGIES
SPSPSQLQAAQIQVQH	QIQVQHVQAAQQIQAA	SPSPSQLQAAQIQVQH
QIQVQHVQAAQQIQAA	AVHPVRDYAAQTSPSP	QIQVQHVQAAQQIQAA
AVHPVRDYAAQTSPSP	AALAVNISAARGLQDV	AVHPVRDYAAQTSPSP
AALAVNISAARGLQDV	FVAAAPVAAATTAAPA	AALAVNISAARGLQDV
FVAAAPVAAATTAAPA	EVAAEEPNAAVPDEIP	FVAAAPVAAATTAAPA
EVAAEEPNAAVPDEIP	RRGHRLSPADDELYQR	RRGHRLSPADDELYQR
RRGHRLSPADDELYQR	FRISQEHLADHFDSRE	FRISQEHLADHFDSRE
FRISQEHLADHFDSRE	LGSSNWEAADLGNEER	LGSSNWEAADLGNEER
LGSSNWEAADLGNEER	RDFIATLEAEAFDDVV	RDFIATLEAEAFDDVV
RDFIATLEAEAFDDVV	QETLVKIQAEHSESGQ	QETLVKIQAEHSESGQ
QETLVKIQAEHSESGQ	MESHRNANAEPAVQRT	ATYAPVISAEKAYHEQ
ATYAPVISAEKAYHEQ	YSTLHTQSAEPPPPPE	MESHRNANAEPAVQRT
MESHRNANAEPAVQRT	APKKPLTRAEVGEKTE	YSTLHTQSAEPPPPPE
YSTLHTQSAEPPPPPE	VGMLSNMIAFYDMARR	APKKPLTRAEVGEKTE
APKKPLTRAEVGEKTE	ESEAENQQAGAAALAP	VGMLSNMIAFYDMARR
VGMLSNMIAFYDMARR	SLRTVSLGAGAKDELH	ESEAENQQAGAAALAP
ESEAENQQAGAAALAP	LLKHYRGPAGDATVAS	SLRTVSLGAGAKDELH
SLRTVSLGAGAKDELH	LLDGKNVNAGGHKLGL	LLKHYRGPAGDATVAS
LLKHYRGPAGDATVAS	LVDGKSINAGGHKVGL	LLDGKNVNAGGHKLGL
LLDGKNVNAGGHKLGL	AVDKKAAGAGKVTKSA	LVDGKSINAGGHKVGL
LVDGKSINAGGHKVGL	SYFTSGLQAGLKQSHL	EHNQSYSQAGITETEW
EHNQSYSQAGITETEW	GARGRGRGAGRNSKQQ	NTFFSETGAGKHVPRA
NTFFSETGAGKHVPRA	SVSSQYNMAGVRTEDS	SYFTSGLQAGLKQSHL
AVDKKAAGAGKVTKSA	TSSKRALGAHLEAEPK	GARGRGRGAGRNSKQQ
SYFTSGLQAGLKQSHL	ISSNPELAAIFESIQK	SVSSQYNMAGVRTEDS
GARGRGRGAGRNSKQQ	AYTIQGQYAIPQPDLT	TSSKRALGAHLEAEPK
SVSSQYNMAGVRTEDS	APHLTRAYAKDVKFGA	ISSNPELAAIFESIQK
TSSKRALGAHLEAEPK	KDKYKNIGAKLVQDVA	TQFTGATGAIMTTETT
ISSNPELAAIFESIQK	AKAVKPKAAKPKTAKP	AYTIQGQYAIPQPDLT
TQFTGATGAIMTTETT	SSIQSIVPALEIANAH	APHLTRAYAKDVKFGA
AYTIQGQYAIPQPDLT	AQSREQLAALKKHHEE	KDKYKNIGAKLVQDVA
APHLTRAYAKDVKFGA	EKVAEKLEALSVKEET	AKAVKPKAAKPKTAKP
KDKYKNIGAKLVQDVA	MDHHFRKPANDITSQL	SSIQSIVPALEIANAH
AKAVKPKAAKPKTAKP	GARGGPAKANSNPFEV	AQSREQLAALKKHHEE
SSIQSIVPALEIANAH	PVAAATTAAPAAAAAP	QKADVTLSALNDSDAN
AQSREQLAALKKHHEE	VSAAPGSAAPAAGSAP	EKVAEKLEALSVKEET
QKADVTLSALNDSDAN	PYEYPYTLAPATSILE	SSGVQPTLAMPNIAVG
EKVAEKLEALSVKEET	GFGLERMAAPIDRVGQ	MDHHFRKPANDITSQL
SSGVQPTLAMPNIAVG	ANVAVVSGAPLQGQLV	GARGGPAKANSNPFEV
MDHHFRKPANDITSQL	SEAAPEAGAPTSASGL	PVAAATTAAPAAAAAP
GARGGPAKANSNPFEV	KPGMVVTFAPVNVTTE	VSAAPGSAAPAAGSAP
PVAAATTAAPAAAAAP	TTYTSQNNAQGPLYEQ	PYEYPYTLAPATSILE
VSAAPGSAAPAAGSAP	QEMIARMQAQMQMQMQ	GFGLERMAAPIDRVGQ
PYEYPYTLAPATSILE	SGVYRPPGARLTTTRK	ANVAVVSGAPLQGQLV
GFGLERMAAPIDRVGQ	PNSAIFGGARPREEVV	VPPSKASLAPTPAASP
ANVAVVSGAPLQGQLV	QHTLEDLSARVDAVKE	SEAAPEAGAPTSASGL
VPPSKASLAPTPAASP	SLLGFSVNASSERLNM	KPGMVVTFAPVNVTTE
SEAAPEAGAPTSASGL	ELQMTRQMASSGASGG	TTYTSQNNAQGPLYEQ
KPGMVVTFAPVNVTTE	PSTSRSLYASSPGGVY	QEMIARMQAQMQMQMQ
TTYTSQNNAQGPLYEQ	SEYQQYQDATAEEEED	SGVYRPPGARLTTTRK
QEMIARMQAQMQMQMQ	SEYQQYQDATAEEEGE	PNSAIFGGARPREEVV
SGVYRPPGARLTTTRK	VSVSALTLATETVRSI	QHTLEDLSARVDAVKE
PNSAIFGGARPREEVV	KASKTAENATSGETLE	GAAAMRSMASGGGVPT
QHTLEDLSARVDAVKE	GAGKHVPRAVFVDLEP	SLLGFSVNASSERLNM
GAAAMRSMASGGGVPT	HRNANAEPAVQRTLLE	ELQMTRQMASSGASGG
SLLGFSVNASSERLNM	ELGEYGLQAYTEVKTV	PSTSRSLYASSPGGVY
PSTSRSLYASSPGGVY	PEIDITCWDADPVPEE	SEYQQYQDATAEEEED
SEYQQYQDATAEEEED	AKDVKFGADARALMLQ	VSVSALTLATETVRSI
VSVSALTLATETVRSI	WHSSRPVRDDSVVEKS	KASKTAENATSGETLE
KASKTAENATSGETLE	RGRSSFYPDGGDQETA	GAGKHVPRAVFVDLEP
GAGKHVPRAVFVDLEP	HHFRKPANDITSQLEI	HRNANAEPAVQRTLLE
HRNANAEPAVQRTLLE	KAEGDAKGDKAKVKDE	ELGEYGLQAYTEVKTV
ELGEYGLQAYTEVKTV	GGTKVVLDDKDYFLFR	PEIDITCWDADPVPEE
PEIDITCWDADPVPEE	VAKSIDLKDKYKNIGA	AKDVKFGADARALMLQ
AKDVKFGADARALMLQ	GSSNWEAADLGNEERK	WHSSRPVRDDSVVEKS
WHSSRPVRDDSVVEKS	GQYAIPQPDLTKLHQL	AKFWEVISDEHGIDPT
AKFWEVISDEHGIDPT	CVPVANKRDTRSIEEA	RGRSSFYPDGGDQETA
RGRSSFYPDGGDQETA	DKSSASAPDVDDPEAF	KKAGSGKNDHAEKVAE
HHFRKPANDITSQLEI	HLTRAYAKDVKFGADA	HHFRKPANDITSQLEI
KAEGDAKGDKAKVKDE	KAYVRLAPDYDALDVA	KAEGDAKGDKAKVKDE
GGTKVVLDDKDYFLFR	SLGSLQTPEAVTTRKG	GGTKVVLDDKDYFLFR
VAKSIDLKDKYKNIGA	TEDSIRDYEDGMEVDT	VAKSIDLKDKYKNIGA
GSSNWEAADLGNEERK	PRFRFGPPEDMPQTSS	GSSNWEAADLGNEERK
GQYAIPQPDLTKLHQL	QDVANNTNEEAGDGTT	GQYAIPQPDLTKLHQL
CVPVANKRDTRSIEEA	QQYQDATAEEEEDFGE	CVPVANKRDTRSIEEA
DKSSASAPDVDDPEAF	GSGRGPPQEEEEEEDE	HLTRAYAKDVKFGADA
HLTRAYAKDVKFGADA	TAPVPTVGEGYGYGHE	KAYVRLAPDYDALDVA
KAYVRLAPDYDALDVA	RKTPQGPPEIYSDTQF	SLGSLQTPEAVTTRKG
SLGSLQTPEAVTTRKG	AAKLERLREKDKHIEE	TEDSIRDYEDGMEVDT
TEDSIRDYEDGMEVDT	ACKFAELKEKIDRRSG	PRFRFGPPEDMPQTSS
PRFRFGPPEDMPQTSS	EGKTKEVYELLDSPGK	QDVANNTNEEAGDGTT
QDVANNTNEEAGDGTT	ESHRNANAEPAVQRTL	QQYQDATAEEEEDFGE
QQYQDATAEEEEDFGE	TYRQLFHPEQLITGKE	GSGRGPPQEEEEEEDE
GSGRGPPQEEEEEEDE	VLRQFVRHESETTTSL	RKTPQGPPEIYSDTQF
TAPVPTVGEGYGYGHE	RGQEPQMKETIMNQEK	AAKLERLREKDKHIEE
RKTPQGPPEIYSDTQF	RTLLIKTVETRDGQVI	ACKFAELKEKIDRRSG
AAKLERLREKDKHIEE	ESAEPSQLEVPATEEI	QELRPTLNELGISTPE
ACKFAELKEKIDRRSG	QTAFSQLAFAGKKEHD	EGKTKEVYELLDSPGK
QELRPTLNELGISTPE	IATLEAEAFDDVVGET	ESHRNANAEPAVQRTL
EGKTKEVYELLDSPGK	GIGGMQQHFFDDEDRT	TYRQLFHPEQLITGKE
ESHRNANAEPAVQRTL	SSSSYRRMFGGPGTAS	VLRQFVRHESETTTSL
TYRQLFHPEQLITGKE	AMGFQRRFFHQDQSPV	RTLLIKTVETRDGQVI
VLRQFVRHESETTTSL	AYQKKKLCFKENAEQG	ESAEPSQLEVPATEEI
RGQEPQMKETIMNQEK	QDSYLGDEFKSQIDVA	QTAFSQLAFAGKKEHD
RTLLIKTVETRDGQVI	LKADKDYHFKVDNDEN	IATLEAEAFDDVVGET
ESAEPSQLEVPATEEI	GKFLQGDSFLNEDLNQ	GIGGMQQHFFDDEDRT
KLYEGKTKEVYELLDS	TSKGQKCEFQDAYVLL	SSSSYRRMFGGPGTAS
QTAFSQLAFAGKKEHD	RKVVDYSQFQESDDAD	AMGFQRRFFHQDQSPV
IATLEAEAFDDVVGET	KRVETSEHFRIDGPVI	AYQKKKLCFKENAEQG
GIGGMQQHFFDDEDRT	GDHKSTSHFRTGEEDK	QDSYLGDEFKSQIDVA
SSSSYRRMFGGPGTAS	KSKENPRNFSDNQLQE	LKADKDYHFKVDNDEN
AMGFQRRFFHQDQSPV	NPLPGGRNFSGTASTS	GKFLQGDSFLNEDLNQ
AYQKKKLCFKENAEQG	RPPGGGSNFSLGFDEP	TSKGQKCEFQDAYVLL
QDSYLGDEFKSQIDVA	PGLPTRPCFYDIDLDP	RKVVDYSQFQESDDAD
LKADKDYHFKVDNDEN	KQKFLRLMGAGKKEHT	KRVETSEHFRIDGPVI
TSKGQKCEFQDAYVLL	EGNNPAENGDAKTDQA	GDHKSTSHFRTGEEDK
RKVVDYSQFQESDDAD	RERDERRRGDDWNDRE	KSKENPRNFSDNQLQE
KRVETSEHFRIDGPVI	EGDGEEEDGDEDEEAE	NPLPGGRNFSGTASTS
GDHKSTSHFRTGEEDK	LGMPAFKPGEKVLLSD	RLLQDSVDFSLADAIN
KSKENPRNFSDNQLQE	GGGSNFSLGFDEPTEQ	RPPGGGSNFSLGFDEP
NPLPGGRNFSGTASTS	ANPNSAIFGGARPREE	PGLPTRPCFYDIDLDP
RPPGGGSNFSLGFDEP	TVGEGYGYGHESELSQ	KQKFLRLMGAGKKEHT
KQKFLRLMGAGKKEHT	PTSASGLNGHPTLSGG	EGNNPAENGDAKTDQA
EGNNPAENGDAKTDQA	KLKQSLPPGLAVKELK	RERDERRRGDDWNDRE
RERDERRRGDDWNDRE	VPGPLPDFGLEESGHS	EGDGEEEDGDEDEEAE
LGMPAFKPGEKVLLSD	QAQLALKPGLIGNANM	LGMPAFKPGEKVLLSD
GGGSNFSLGFDEPTEQ	KDTAPVLEGLKEEEIT	GGGSNFSLGFDEPTEQ
ANPNSAIFGGARPREE	SNYGPMKSGNFGGSRN	ANPNSAIFGGARPREE
TVGEGYGYGHESELSQ	VQDSYEAYGQDDWNGT	TVGEGYGYGHESELSQ
PTSASGLNGHPTLSGG	EVVRHKNRGRDEVSKN	KLKQSLPPGLAVKELK
KLKQSLPPGLAVKELK	CTLAEKLGGSAVISLE	VPGPLPDFGLEESGHS
VPGPLPDFGLEESGHS	PTNGMAKNGSEADIDE	QAQLALKPGLIGNANM
QAQLALKPGLIGNANM	TAAFIRVVGSEFVQKY	KDTAPVLEGLKEEEIT
KDTAPVLEGLKEEEIT	ALSSDFTCGSPTAAGK	SNYGPMKSGNFGGSRN
SNYGPMKSGNFGGSRN	ENLKSKVGGTKPAGGD	EQKNAEQNGPVDGQGD
EQKNAEQNGPVDGQGD	KGTENGVNGTLTSNVA	VQDSYEAYGQDDWNGT
VQDSYEAYGQDDWNGT	QTTISLQMGTNKGASQ	EVVRHKNRGRDEVSKN
EVVRHKNRGRDEVSKN	KNVIGLQMGTNRGASQ	CTLAEKLGGSAVISLE
CTLAEKLGGSAVISLE	GPCNMPKPGVFDLINK	PTNGMAKNGSEADIDE
PTNGMAKNGSEADIDE	DMRQTVAVGVIKAVDK	TAAFIRVVGSEFVQKY
TAAFIRVVGSEFVQKY	VRLRSSVPGVRLLQDS	ALSSDFTCGSPTAAGK
ALSSDFTCGSPTAAGK	AGGTRGSNHARIDAAE	KGTENGVNGTLTSNVA
ENLKSKVGGTKPAGGD	LGMDPMMEHEMGGHHP	QTTISLQMGTNKGASQ
KGTENGVNGTLTSNVA	VISAEKAYHEQLSVAE	KNVIGLQMGTNRGASQ
QTTISLQMGTNKGASQ	GIDPTGTYHGDSDLQL	GPCNMPKPGVFDLINK
KNVIGLQMGTNRGASQ	FWEVISDEHGIDPTGT	DMRQTVAVGVIKAVDK
GPCNMPKPGVFDLINK	ERLREKDKHIEEVRKN	VRLRSSVPGVRLLQDS
DMRQTVAVGVIKAVDK	MTAYGTRRHLYDPKMQ	AGGTRGSNHARIDAAE
VRLRSSVPGVRLLQDS	SQGLSQLYHNQSQGLL	LGMDPMMEHEMGGHHP
AGGTRGSNHARIDAAE	EEGNPLLKHYRGPAGD	VISAEKAYHEQLSVAE
LGMDPMMEHEMGGHHP	NLKDMALNIGNEIDAQ	GIDPTGTYHGDSDLQL
VISAEKAYHEQLSVAE	THSKRTLLIKTVETRD	FWEVISDEHGIDPTGT
GIDPTGTYHGDSDLQL	YTIQGQYAIPQPDLTK	CWELYCLEHGIQPDGQ
FWEVISDEHGIDPTGT	KHASPILPITEFSDIP	ERLREKDKHIEEVRKN
CWELYCLEHGIQPDGQ	KLPTISQRIVSAQSLA	MTAYGTRRHLYDPKMQ
ERLREKDKHIEEVRKN	GVIKAVDKKAAGAGKV	SQGLSQLYHNQSQGLL
MTAYGTRRHLYDPKMQ	KTTEAKMMKAGGTEIG	EEGNPLLKHYRGPAGD
SQGLSQLYHNQSQGLL	AGARGGPAKANSNPFE	NLKDMALNIGNEIDAQ
EEGNPLLKHYRGPAGD	REDMAALEKDYEEVGV	LVLRLRGGIIEPSLRQ
NLKDMALNIGNEIDAQ	FGCELKADKDYHFKVD	THSKRTLLIKTVETRD
THSKRTLLIKTVETRD	SKLDWESFKEEEGIGE	YTIQGQYAIPQPDLTK
YTIQGQYAIPQPDLTK	TAAGKKTEKEESTEVL	KHASPILPITEFSDIP
KHASPILPITEFSDIP	LTHKMEANKENREAQM	KLPTISQRIVSAQSLA
KLPTISQRIVSAQSLA	TRGQEPQMKETIMNQE	GVIKAVDKKAAGAGKV
GVIKAVDKKAAGAGKV	VGVIKAVDKKAAGAGK	KTTEAKMMKAGGTEIG
KTTEAKMMKAGGTEIG	GSKKAEQKKKEKIIED	AGARGGPAKANSNPFE
AGARGGPAKANSNPFE	ILRIDDLIKLHPESKD	REDMAALEKDYEEVGA
REDMAALEKDYEEVGA	ETSIDVAGKPNEVTKA	REDMAALEKDYEEVGV
REDMAALEKDYEEVGV	ARLFGIRAKRAKEAAE	FGCELKADKDYHFKVD
FGCELKADKDYHFKVD	FSSSSSTRKRGPSEET	SKLDWESFKEEEGIGE
SKLDWESFKEEEGIGE	RGSRRTPRKRVETSEH	TAAGKKTEKEESTEVL
TAAGKKTEKEESTEVL	LEDGPKFLKSGDAAIV	LTHKMEANKENREAQM
LTHKMEANKENREAQM	TKDGVTVAKSIDLKDK	TRGQEPQMKETIMNQE
TRGQEPQMKETIMNQE	KQKMSTLEKSKLDWES	VGVIKAVDKKAAGAGK
VGVIKAVDKKAAGAGK	PRTVSGRYKSTTSVSE	GSKKAEQKKKEKIIED
GSKKAEQKKKEKIIED	KKASSKKQKTENVFVD	KDMPPRFSKKGQLNAD
KDMPPRFSKKGQLNAD	HSKRTLLIKTVETRDG	ILRIDDLIKLHPESKD
ILRIDDLIKLHPESKD	AVGSAVVNKVPLTGKK	DKYKNIGAKLVQDVAN
DKYKNIGAKLVQDVAN	MSRPVRNRKVVDYSQF	ETSIDVAGKPNEVTKA
ETSIDVAGKPNEVTKA	AVAPSAVNLADPRTPT	ARLFGIRAKRAKEAAE
ARLFGIRAKRAKEAAE	GGQEKHAPLADQILAG	FSSSSSTRKRGPSEET
FSSSSSTRKRGPSEET	MVRERESFLAPSSGVQ	RGSRRTPRKRVETSEH
RGSRRTPRKRVETSEH	LVSVSALTLATETVRS	LEDGPKFLKSGDAAIV
LEDGPKFLKSGDAAIV	QGQHTISPLDLAKLNQ	TKDGVTVAKSIDLKDK
TKDGVTVAKSIDLKDK	KNQALKLQLDNQYAVL	KQKMSTLEKSKLDWES
KQKMSTLEKSKLDWES	HAEKVAEKLEALSVKE	PRTVSGRYKSTTSVSE
PRTVSGRYKSTTSVSE	YLTGKRHTLEKNVLVV	KKASSKKQKTENVFVD
KKASSKKQKTENVFVD	MRKVPRVSLERLDLDL	YETIGKTTKTPEDGDY
YETIGKTTKTPEDGDY	QESAEPSQLEVPATEE	HSKRTLLIKTVETRDG
HSKRTLLIKTVETRDG	RRKHQITYLIHQAKER	AVGSAVVNKVPLTGKK
AVGSAVVNKVPLTGKK	DTHSKRTLLIKTVETR	MSRPVRNRKVVDYSQF
MSRPVRNRKVVDYSQF	QTAHRRNMLKGQHEKE	AVAPSAVNLADPRTPT
AVAPSAVNLADPRTPT	DDDAGSAPLKSSGQHQ	GGQEKHAPLADQILAG
GGQEKHAPLADQILAG	RSSVPGVRLLQDSVDF	LVSVSALTLATETVRS
MVRERESFLAPSSGVQ	TADNLVLNLQDESFTR	QGQHTISPLDLAKLNQ
LVSVSALTLATETVRS	GADARALMLQGVDLLA	KNQALKLQLDNQYAVL
QGQHTISPLDLAKLNQ	PHQVEQTELQQEQLQT	HAEKVAEKLEALSVKE
KNQALKLQLDNQYAVL	AGRNSKQQLSAEELDA	LANEKNLKLEGTEDLS
HAEKVAEKLEALSVKE	SKSFQQSSLSRDSQGH	YLTGKRHTLEKNVLVV
LANEKNLKLEGTEDLS	DLEIGPGQLSSSTFDS	QESAEPSQLEVPATEE
YLTGKRHTLEKNVLVV	KELAEQLGLSTGEKEK	RRKHQITYLIHQAKER
MRKVPRVSLERLDLDL	DLTKRAGELTEDEVER	DTHSKRTLLIKTVETR
QESAEPSQLEVPATEE	PLLVSVSALTLATETV	DDDAGSAPLKSSGQHQ
RRKHQITYLIHQAKER	RCSRYLYTLVITDKEK	RSSVPGVRLLQDSVDF
DTHSKRTLLIKTVETR	GPPLRGSNMDFREPTE	VLQIMKASLLTDEEDV
QTAHRRNMLKGQHEKE	KRAMNKSFMESGGTVL	LDAAGVASLLTTAEVV
DDDAGSAPLKSSGQHQ	VSSSSYRRMFGGPGTA	TADNLVLNLQDESFTR
QTVTQLQQLLQAVNQQ	GKNVIGLQMGTNRGAS	GADARALMLQGVDLLA
RSSVPGVRLLQDSVDF	GTRGQEPQMKETIMNQ	PHQVEQTELQQEQLQT
LDAAGVASLLTTAEVV	EPQMKETIMNQEKLAK	AGRNSKQQLSAEELDA
TADNLVLNLQDESFTR	LGRFAVRDMRQTVAVG	SKSFQQSSLSRDSQGH
GADARALMLQGVDLLA	GGYGGQSSMSGYDQVL	DLEIGPGQLSSSTFDS
PHQVEQTELQQEQLQT	LASLMNLGMSSSLNQQ	KELAEQLGLSTGEKEK
SKSFQQSSLSRDSQGH	AMQQSHFPMTHGNTGF	DLTKRAGELTEDEVER
DLEIGPGQLSSSTFDS	STTYTSQNNAQGPLYE	PLLVSVSALTLATETV
KELAEQLGLSTGEKEK	LRMKLSDFNDITNMLL	RCSRYLYTLVITDKEK
PLLVSVSALTLATETV	FACLLHLANEKNLKLE	GPPLRGSNMDFREPTE
RCSRYLYTLVITDKEK	PVGTASLQNFNISNLQ	KRAMNKSFMESGGTVL
DSPNKLYTLVTYVPVT	AQVATISANGDKEIGN	VSSSSYRRMFGGPGTA
GPPLRGSNMDFREPTE	KVETVKSDNKDDDIDI	GKNVIGLQMGTNRGAS
KRAMNKSFMESGGTVL	IGVTAVAFNKELDPIQ	GTRGQEPQMKETIMNQ
VSSSSYRRMFGGPGTA	PSIDKTLVNKVVHSSV	EPQMKETIMNQEKLAK
GKNVIGLQMGTNRGAS	KVEVNNLNNLNNHDRK	LGRFAVRDMRQTVAVG
GTRGQEPQMKETIMNQ	DYSGNYGYNNDNQEFY	GGYGGQSSMSGYDQVL
EPQMKETIMNQEKLAK	DIQPGPLFNNNADGVA	LASLMNLGMSSSLNQQ
LGRFAVRDMRQTVAVG	SVFQTNQSNNQQSNFE	AMQQSHFPMTHGNTGF
GGYGGQSSMSGYDQVL	ATPLNQVANPNSAIFG	STTYTSQNNAQGPLYE
AMQQSHFPMTHGNTGF	ERIKQHPKNQEEYKEV	LRMKLSDFNDITNMLL
STTYTSQNNAQGPLYE	HLQAGQCGNQIGAKFW	FACLLHLANEKNLKLE
LRMKLSDFNDITNMLL	HIQAGQCGNQIGAKFW	PVGTASLQNFNISNLQ
PVGTASLQNFNISNLQ	HIQAGQCGNQIGTKFW	AQVATISANGDKEIGN
AQVATISANGDKEIGN	QALKLQLDNQYAVLEN	KVETVKSDNKDDDIDI
KVETVKSDNKDDDIDI	EGFGCVVTNRFDQLFD	IGVTAVAFNKELDPIQ
IGVTAVAFNKELDPIQ	EADFSIHFNRFNPDGE	PSIDKTLVNKVVHSSV
KVEVNNLNNLNNHDRK	IGEELAIHNRGKEGYI	KVEVNNLNNLNNHDRK
AKKIEALLNLPRNPSV	PLNQVANPNSAIFGGA	DYSGNYGYNNDNQEFY
DYSGNYGYNNDNQEFY	PLILKPFGNSISRYNG	DIQPGPLFNNNADGVA
DIQPGPLFNNNADGVA	KRKVKQLFNSLATQEG	SVFQTNQSNNQQSNFE
SVFQTNQSNNQQSNFE	EASQSHLRNSPEDKRA	ATPLNQVANPNSAIFG
ATPLNQVANPNSAIFG	SHFPMTHGNTGFSGIE	ERIKQHPKNQEEYKEV
ERIKQHPKNQEEYKEV	SGQKTVLSNVQEELDR	HLQAGQCGNQIGAKFW
HLQAGQCGNQIGAKFW	YGEYMDKNNVRRQATT	HIQAGQCGNQIGAKFW
HIQAGQCGNQIGAKFW	SHRNANAEPAVQRTLL	HIQAGQCGNQIGTKFW
HIQAGQCGNQIGTKFW	VCTLAIIDPGDSDIIR	QALKLQLDNQYAVLEN
QALKLQLDNQYAVLEN	GKETKAADPPAENSSA	RNILSRLANRAPEPTP
RNILSRLANRAPEPTP	LVPVPVSEPVPEPEPE	EGFGCVVTNRFDQLFD
EGFGCVVTNRFDQLFD	QEPANPNMPVVLTSGT	EADFSIHFNRFNPDGE
IGEELAIHNRGKEGYI	PKAEVARAQAALAVNI	IGEELAIHNRGKEGYI
PLNQVANPNSAIFGGA	ILYEHQLGQASGLGGS	PLNQVANPNSAIFGGA
PLILKPFGNSISRYNG	SQIDVALSQDSTYQGE	PLILKPFGNSISRYNG
KRKVKQLFNSLATQEG	GMSSSLNQQGAHSALS	KRKVKQLFNSLATQEG
EASQSHLRNSPEDKRA	TPGIGGMQQHFFDDED	EASQSHLRNSPEDKRA
SHFPMTHGNTGFSGIE	KVQNGSVHQKDGLNDD	SHFPMTHGNTGFSGIE
SGQKTVLSNVQEELDR	KKKASSKKQKTENVFV	SGQKTVLSNVQEELDR
YGEYMDKNNVRRQATT	LGMSSSLNQQGAHSAL	YGEYMDKNNVRRQATT
SHRNANAEPAVQRTLL	AGQIRATQQQHDFTLT	SHRNANAEPAVQRTLL
VCTLAIIDPGDSDIIR	HDMRVHPYQRIVTADR	VCTLAIIDPGDSDIIR
VYSKAASVPKVETVKS	KKEDALLYQSKGYNDD	VYSKAASVPKVETVKS
GEEAGPGDPLLEAVPK	RFAVRDMRQTVAVGVI	GEEAGPGDPLLEAVPK
GKETKAADPPAENSSA	RTVATPLNQVANPNSA	GKETKAADPPAENSSA
DITCWDADPVPEEEEG	KTVETRDGQVINETSQ	DITCWDADPVPEEEEG
LVPVPVSEPVPEPEPE	LRNSPEDKRAGGEESQ	LVPVPVSEPVPEPEPE
QEPANPNMPVVLTSGT	NNPQRTGQRAQENYEG	QEPANPNMPVVLTSGT
PKAEVARAQAALAVNI	KETRGQPARAVDLVEE	PKAEVARAQAALAVNI
ILYEHQLGQASGLGGS	TGAGKHVPRAVFVDLE	ILYEHQLGQASGLGGS
SQIDVALSQDSTYQGE	VVRHKNRGRDEVSKNQ	SQIDVALSQDSTYQGE
GKQAEVANQETKEDLP	VNVDKVLERDQKLSEL	GKQAEVANQETKEDLP
GMSSSLNQQGAHSALS	EKFEPTVFRDTLVQGL	GMSSSLNQQGAHSALS
TPGIGGMQQHFFDDED	SPPQKRMRRDWDEHSS	QRDPWPVPQGKRPLRS
KVQNGSVHQKDGLNDD	TLSGGGDQREAQTLDS	TPGIGGMQQHFFDDED
LGMSSSLNQQGAHSAL	GGLSRSLGREEEEDEE	KVQNGSVHQKDGLNDD
HDMRVHPYQRIVTADR	PEAAQMVRREFQLDLD	KKKASSKKQKTENVFV
KKEDALLYQSKGYNDD	MAAKLERLREKDKHIE	LGMSSSLNQQGAHSAL
AGPSRAVRQSVTSFPD	QVRAALLSRELAGGLE	AGQIRATQQQHDFTLT
RFAVRDMRQTVAVGVI	IKSKVVGDRENGSDNL	HDMRVHPYQRIVTADR
RTVATPLNQVANPNSA	PNFSSLNLRETNLDSL	KKEDALLYQSKGYNDD
KTVETRDGQVINETSQ	FSDYPPLGRFAVRDMR	AGPSRAVRQSVTSFPD
QSSMSGYDQVLQENSS	GFGCVVTNRFDQLFDD	RFAVRDMRQTVAVGVI
NNPQRTGQRAQENYEG	SDNGVRVQRFFVADTA	RTVATPLNQVANPNSA
KETRGQPARAVDLVEE	EKLKKRKERFGIVTSS	KTVETRDGQVINETSQ
TGAGKHVPRAVFVDLE	GSQSSKAPRGDVTAEE	IKALEAHKRAEEFLTA
VVRHKNRGRDEVSKNQ	QAILAAQRRGEDVETS	LRNSPEDKRAGGEESQ
VNVDKVLERDQKLSEL	TKKKRGSYRGGSISVQ	NNPQRTGQRAQENYEG
EKFEPTVFRDTLVQGL	SFKAELSYRGPVSGTE	KETRGQPARAVDLVEE
SPPQKRMRRDWDEHSS	FEVVRHKNRGRDEVSK	TGAGKHVPRAVFVDLE
TLSGGGDQREAQTLDS	GVREKRRGRGTGEAEE	VVRHKNRGRDEVSKNQ
PEAAQMVRREFQLDLD	EQMEQMKQRIAEENIM	VNVDKVLERDQKLSEL
MAAKLERLREKDKHIE	RVETSEHFRIDGPVIS	EKFEPTVFRDTLVQGL
QVRAALLSRELAGGLE	SASKDVPGRILLDIDN	SPPQKRMRRDWDEHSS
IKSKVVGDRENGSDNL	KDFLLTARRKDAKSVK	GGLSRSLGREEEEDEE
PNFSSLNLRETNLDSL	SEVDKKLKRKKQVAPE	PEAAQMVRREFQLDLD
FSDYPPLGRFAVRDMR	GLNVSSISRKSEDDEK	MAAKLERLREKDKHIE
GFGCVVTNRFDQLFDD	HRRQEELKRLEENDDD	QVRAALLSRELAGGLE
SDNGVRVQRFFVADTA	RLGRSKRKRLEVEEPL	IKSKVVGDRENGSDNL
EKLKKRKERFGIVTSS	LERKKETQRLLEEEDS	PNFSSLNLRETNLDSL
IGLQMGTNRGASQAGM	FSVNASSERLNMGEIE	FSDYPPLGRFAVRDMR
GSQSSKAPRGDVTAEE	AQMAAKLERLREKDKH	GFGCVVTNRFDQLFDD
QAILAAQRRGEDVETS	DLETMRRQRNEVVVEL	SDNGVRVQRFFVADTA
VRLYVELHRGEELGGG	PLLGGALQRQIRGIPG	EKLKKRKERFGIVTSS
TKKKRGSYRGGSISVQ	GRFAVRDMRQTVAVGV	IGLQMGTNRGASQAGM
FEVVRHKNRGRDEVSK	QGKRKTLQRRDLDNAI	GSQSSKAPRGDVTAEE
GVREKRRGRGTGEAEE	KQAILAAQRRGEDVET	QAILAAQRRGEDVETS
EQMEQMKQRIAEENIM	AELKEKIDRRSGKKLE	VRLYVELHRGEELGGG
RVETSEHFRIDGPVIS	EKRASSPFRRVREEEI	TKKKRGSYRGGSISVQ
SASKDVPGRILLDIDN	YRQDDPSYRSFHSGGY	FEVVRHKNRGRDEVSK
SEVDKKLKRKKQVAPE	GQIPGRERRSGPTDDG	GVREKRRGRGTGEAEE
DSVMDHHFRKPANDIT	KELVLDNSRSNEGKLE	EQMEQMKQRIAEENIM
GLNVSSISRKSEDDEK	SILKRGLKRSQEDEIS	RVETSEHFRIDGPVIS
HRRQEELKRLEENDDD	GGRPNRGSRTDKSSAS	SEVDKKLKRKKQVAPE
RLGRSKRKRLEVEEPL	DHKSTSHFRTGEEDKK	GLNVSSISRKSEDDEK
LERKKETQRLLEEEDS	PLVDTHSKRTLLIKTV	HRRQEELKRLEENDDD
FSVNASSERLNMGEIE	AVTMGPKGRTVIIEQS	RLGRSKRKRLEVEEPL
AQMAAKLERLREKDKH	TPVTLKQRRVEHNQSY	LERKKETQRLLEEEDS
DLETMRRQRNEVVVEL	NVYKKEKARVITEEEK	FSVNASSERLNMGEIE
PLLGGALQRQIRGIPG	MGGTTSTRRVTFEADE	AQMAAKLERLREKDKH
GRFAVRDMRQTVAVGV	LNQVANPNSAIFGGAR	DLETMRRQRNEVVVEL
QGKRKTLQRRDLDNAI	KQKADVTLSALNDSDA	PLLGGALQRQIRGIPG
KQAILAAQRRGEDVET	QAAAQQGYSAYTAQPT	GRFAVRDMRQTVAVGV
AELKEKIDRRSGKKLE	YTEHQVVSSDFNSDTH	QGKRKTLQRRDLDNAI
EKRASSPFRRVREEEI	IQPDGQMPSDKTIGGG	KQAILAAQRRGEDVET
YRQDDPSYRSFHSGGY	LELRNRTPSDVKELVL	AELKEKIDRRSGKKLE
GQIPGRERRSGPTDDG	RKGTGLLSSDYRIING	EKRASSPFRRVREEEI
KELVLDNSRSNEGKLE	EVVKVGQASEIARQTA	YRQDDPSYRSFHSGGY
SILKRGLKRSQEDEIS	EMPDTVLQSETLKDTA	GQIPGRERRSGPTDDG
GGRPNRGSRTDKSSAS	SIEANVESSEVHVERA	KELVLDNSRSNEGKLE
DHKSTSHFRTGEEDKK	ESNMNDLVSEYQQYQD	SILKRGLKRSQEDEIS
PLVDTHSKRTLLIKTV	YYSQSQGDSEYYDYGH	GGRPNRGSRTDKSSAS
AVTMGPKGRTVIIEQS	GIGSRGDRSGFGKFER	EVEGKMVSRTEGNIDD
TPVTLKQRRVEHNQSY	ERLKGLLQSGQIPGRE	DHKSTSHFRTGEEDKK
GSRRTPRKRVETSEHF	GYGGQSSMSGYDQVLQ	PLVDTHSKRTLLIKTV
PGVGGVRSRVGIQQGL	AFVQPTQQSHPQIEPA	AVTMGPKGRTVIIEQS
NVYKKEKARVITEEEK	NVPASVCYSHTDIKVP	TPVTLKQRRVEHNQSY
MGGTTSTRRVTFEADE	KDGVTVAKSIDLKDKY	GSRRTPRKRVETSEHF
LNQVANPNSAIFGGAR	PSSATADTSIFAGQND	PGVGGVRSRVGIQQGL
KQKADVTLSALNDSDA	PYTLAPATSILEYPIE	NVYKKEKARVITEEEK
SAAAMNLASARTPAIP	TLATETVRSILKIDDV	KLSTACPGRVPSMVST
GQYIENLMSASSVFQT	VMQVADLQSINISGNG	MGGTTSTRRVTFEADE
QAAAQQGYSAYTAQPT	QRFGLNVSSISRKSED	LNQVANPNSAIFGGAR
EFYHVPTHSDASKKRL	LILKPFGNSISRYNGE	KQKADVTLSALNDSDA
YTEHQVVSSDFNSDTH	EKKISSIQSIVPALEI	SAAAMNLASARTPAIP
IQPDGQMPSDKTIGGG	DLIKLHPESKDDKHGS	GQYIENLMSASSVFQT
LELRNRTPSDVKELVL	RGRGAGRNSKQQLSAE	QAAAQQGYSAYTAQPT
RKGTGLLSSDYRIING	RPRSPGSNSKVPEIEV	EFYHVPTHSDASKKRL
EVVKVGQASEIARQTA	EDRVGTIKSKVVGDRE	YTEHQVVSSDFNSDTH
EMPDTVLQSETLKDTA	PASKFSSASKYAALSV	LELRNRTPSDVKELVL
SIEANVESSEVHVERA	PPGGGSNFSLGFDEPT	RKGTGLLSSDYRIING
ESNMNDLVSEYQQYQD	VTTSTRTYSLGSALRP	EVVKVGQASEIARQTA
YYSQSQGDSEYYDYGH	PVYRQPPESLKLEAGD	EMPDTVLQSETLKDTA
GIGSRGDRSGFGKFER	AKDGAPRRSLNLEDYK	SIEANVESSEVHVERA
ERLKGLLQSGQIPGRE	ASQSHLRNSPEDKRAG	ESNMNDLVSEYQQYQD
GYGGQSSMSGYDQVLQ	QMGTNRGASQAGMTGY	YYSQSQGDSEYYDYGH
AFVQPTQQSHPQIEPA	RNRKVVDYSQFQESDD	GIGSRGDRSGFGKFER
NVPASVCYSHTDIKVP	PMFVETQASQGTLQTR	ERLKGLLQSGQIPGRE
KDGVTVAKSIDLKDKY	RTAAFRALSQGVESVK	GYGGQSSMSGYDQVLQ
PSSATADTSIFAGQND	TKQNSVPPSQTKSETS	AFVQPTQQSHPQIEPA
PYTLAPATSILEYPIE	NVKFKVRCSRYLYTLV	NVPASVCYSHTDIKVP
TLATETVRSILKIDDV	YNNPAGLYSSENISNF	KDGVTVAKSIDLKDKY
QRFGLNVSSISRKSED	RLRVPCRASSGGGGGG	PSSATADTSIFAGQND
LILKPFGNSISRYNGE	AQRFGLNVSSISRKSE	PYTLAPATSILEYPIE
EKKISSIQSIVPALEI	APSDFINFSSLDDEGD	TLATETVRSILKIDDV
DLIKLHPESKDDKHGS	ARSQAPLESSLDSLGD	VMQVADLQSINISGNG
RGRGAGRNSKQQLSAE	ISLPLPNFSSLNLRET	QRFGLNVSSISRKSED
RPRSPGSNSKVPEIEV	RSQPAFMQSSLSQPSV	LILKPFGNSISRYNGE
EDRVGTIKSKVVGDRE	PQDLPQRKSSLVTSKL	EKKISSIQSIVPALEI
PASKFSSASKYAALSV	SNIVEVVQSSPVERPS	DLIKLHPESKDDKHGS
PPGGGSNFSLGFDEPT	QMHTPPVQSSSACMFS	RGRGAGRNSKQQLSAE
VTTSTRTYSLGSALRP	THSSGTVTSSSSTANI	RPRSPGSNSKVPEIEV
PVYRQPPESLKLEAGD	HSSGTVTSSSSTANID	EDRVGTIKSKVVGDRE
AKDGAPRRSLNLEDYK	RSSAVRLRSSVPGVRL	PASKFSSASKYAALSV
ASQSHLRNSPEDKRAG	LGSRLYGPSSVSFADD	PPGGGSNFSLGFDEPT
RVEHNQSYSQAGITET	RPLRPGQYSTISEVAL	VTTSTRTYSLGSALRP
QMGTNRGASQAGMTGY	SYSFSDLNSTRGDADM	PVYRQPPESLKLEAGD
RNRKVVDYSQFQESDD	EETTAGEQSTRSFILD	AKDGAPRRSLNLEDYK
PMFVETQASQGTLQTR	SAAFSSVGSVITKKLE	ASQSHLRNSPEDKRAG
RTAAFRALSQGVESVK	KHMLADVFSVKTEMID	RVEHNQSYSQAGITET
TKQNSVPPSQTKSETS	PNDQYKFYSVNVDYSK	QMGTNRGASQAGMTGY
NVKFKVRCSRYLYTLV	YGHGEVQDSYEAYGQD	RNRKVVDYSQFQESDD
LLGFSVNASSERLNMG	KKRGREDESYNISEVM	PMFVETQASQGTLQTR
RLRVPCRASSGGGGGG	KQQNQYQASYNQSFSS	RTAAFRALSQGVESVK
AQRFGLNVSSISRKSE	QRRVEHNQSYSQAGIT	TKQNSVPPSQTKSETS
APSDFINFSSLDDEGD	AAPVAAATTAAPAAAA	NVKFKVRCSRYLYTLV
ARSQAPLESSLDSLGD	AGVASLLTTAEVVVTE	YNNPAGLYSSENISNF
ISLPLPNFSSLNLRET	KQEAGKEGTAPSENGE	LLGFSVNASSERLNMG
RSQPAFMQSSLSQPSV	SARTPAIPTAVNLADS	RLRVPCRASSGGGGGG
SNIVEVVQSSPVERPS	KDVRWPTETDVSSAKN	AQRFGLNVSSISRKSE
QMHTPPVQSSSACMFS	KVKSLKFATEAAITIL	APSDFINFSSLDDEGD
THSSGTVTSSSSTANI	AANASATTTEPLPEKT	ARSQAPLESSLDSLGD
HSSGTVTSSSSTANID	SVSALTLATETVRSIL	ISLPLPNFSSLNLRET
RSSAVRLRSSVPGVRL	YSQAGITETEWTSGSS	RSQPAFMQSSLSQPSV
LGSRLYGPSSVSFADD	TVSVTELQTHPELDTD	PQDLPQRKSSLVTSKL
RPLRPGQYSTISEVAL	RTLKIPAMTIAKNAGV	SNIVEVVQSSPVERPS
SYSFSDLNSTRGDADM	AYSIQGQHTISPLDLA	QMHTPPVQSSSACMFS
EETTAGEQSTRSFILD	KHLTHAQSTLDAKATK	THSSGTVTSSSSTANI
SAAFSSVGSVITKKLE	PYLTGKRHTLEKNVLV	HSSGTVTSSSSTANID
KHMLADVFSVKTEMID	LVDTHSKRTLLIKTVE	RSSAVRLRSSVPGVRL
PNDQYKFYSVNVDYSK	KTETQEKNTLPTKETI	RPLRPGQYSTISEVAL
PDRIMNTFSVVPSPKV	VRCSRYLYTLVITDKE	SYSFSDLNSTRGDADM
YGHGEVQDSYEAYGQD	SFLGFSAPTPIQALTL	EETTAGEQSTRSFILD
KKRGREDESYNISEVM	SRQAQKVATPLPDPMA	SAAFSSVGSVITKKLE
KQQNQYQASYNQSFSS	KKQQISLATQMVRMIL	KHMLADVFSVKTEMID
QRRVEHNQSYSQAGIT	PQTTFGVQTQPQPQSL	PNDQYKFYSVNVDYSK
AAPVAAATTAAPAAAA	QVKYSTLHTQSAEPPP	YGHGEVQDSYEAYGQD
AGVASLLTTAEVVVTE	TLLIKTVETRDGQVIN	KKRGREDESYNISEVM
KQEAGKEGTAPSENGE	QTLPVAPRTRTSQEEL	KQQNQYQASYNQSFSS
SARTPAIPTAVNLADS	AAAPVAAATTAAPAAA	QRRVEHNQSYSQAGIT
KDVRWPTETDVSSAKN	AAGVASLLTTAEVVVT	AAPVAAATTAAPAAAA
KVKSLKFATEAAITIL	SESVSTTTTTHITKTV	AGVASLLTTAEVVVTE
ETVISTKKTEKSNIEE	VSAASLLTTTNQHSSS	NRHAQGEKTAGINVRK
AANASATTTEPLPEKT	YRPPGARLTTTRKTPQ	KQEAGKEGTAPSENGE
SVSALTLATETVRSIL	SKRTLLIKTVETRDGQ	SARTPAIPTAVNLADS
YSQAGITETEWTSGSS	TTTTHITKTVKGGISE	PQYAHMQTTAVPVEEA
VCSNPPCETHETGTTN	AASVPKVETVKSDNKD	KDVRWPTETDVSSAKN
TVSVTELQTHPELDTD	SALTLATETVRSILKI	KVKSLKFATEAAITIL
RTLKIPAMTIAKNAGV	TLKMSVQPTVSLGGFE	AANASATTTEPLPEKT
GQEPQMKETIMNQEKL	ELQQEQLQTVVGTYHG	SVSALTLATETVRSIL
AYSIQGQHTISPLDLA	QEKMTILQTYFRQNRD	YSQAGITETEWTSGSS
KHLTHAQSTLDAKATK	TVATPLNQVANPNSAI	MIQDGPQNTGADKPLR
PYLTGKRHTLEKNVLV	AVRDMRQTVAVGVIKA	VCSNPPCETHETGTTN
LVDTHSKRTLLIKTVE	RDMRQTVAVGVIKAVD	TVSVTELQTHPELDTD
KTETQEKNTLPTKETI	MRQTVAVGVIKAVDKK	RTLKIPAMTIAKNAGV
VRCSRYLYTLVITDKE	AEFARSLLVIPNTLAV	GQEPQMKETIMNQEKL
SFLGFSAPTPIQALTL	SSMSGYDQVLQENSSD	AYSIQGQHTISPLDLA
SRQAQKVATPLPDPMA	MASLSLAPVNIFKAGA	KHLTHAQSTLDAKATK
KKQQISLATQMVRMIL	YPPLGRFAVRDMRQTV	PYLTGKRHTLEKNVLV
PQTTFGVQTQPQPQSL	LGGQDQLRVRVTELED	LVDTHSKRTLLIKTVE
QVKYSTLHTQSAEPPP	VRSIQEAPVSEDLVIR	KTETQEKNTLPTKETI
TLLIKTVETRDGQVIN	IRYVERSYVSKPTLKE	VRCSRYLYTLVITDKE
QTLPVAPRTRTSQEEL	SSQEGTTVVSSGITGI	SRQAQKVATPLPDPMA
GETLQMLTTSTTLEKL	ELVVQPLLVSVSALTL	KKQQISLATQMVRMIL
AAAPVAAATTAAPAAA	GQDQLRVRVTELEDEV	PQTTFGVQTQPQPQSL
AAGVASLLTTAEVVVT	DVAGKPNEVTKAAESP	TLLIKTVETRDGQVIN
SESVSTTTTTHITKTV	RDLPTIPGVTSPSSDE	QTLPVAPRTRTSQEEL
VSAASLLTTTNQHSSS	RPSSSRSYVTTSTRTY	GETLQMLTTSTTLEKL
RPPGARLTTTRKTPQG	KGIIDPTKVVRTALLD	AAAPVAAATTAAPAAA
YRPPGARLTTTRKTPQ	DDDLGSSNWEAADLGN	AAGVASLLTTAEVVVT
SKRTLLIKTVETRDGQ	LAPHLTRAYAKDVKFG	SESVSTTTTTHITKTV
TTTTHITKTVKGGISE	RPSTSRSLYASSPGGV	VSAASLLTTTNQHSSS
AASVPKVETVKSDNKD	AYGTRRHLYDPKMQTD	YRPPGARLTTTRKTPQ
SALTLATETVRSILKI	SKDDKHGSYEDAVHSG	SKRTLLIKTVETRDGQ
TLKMSVQPTVSLGGFE	NTQPIPILYEHQLGQA	TTTTHITKTVKGGISE
ELQQEQLQTVVGTYHG	TSRSLALMYESEKVGV	AASVPKVETVKSDNKD
QEKMTILQTYFRQNRD	QPELSQDSYLGDEFKS	TLKMSVQPTVSLGGFE
TVATPLNQVANPNSAI	GSEISDSDYQAEYPDE	ELQQEQLQTVVGTYHG
AVRDMRQTVAVGVIKA	PKKEDALLYQSKGYND	QEKMTILQTYFRQNRD
RDMRQTVAVGVIKAVD	IGYMGQTAYQYPPPPP	TVATPLNQVANPNSAI
AQLSPQLTVHQPTEQP	GDPRAIVEYRDLDAPD	AVRDMRQTVAVGVIKA
MRQTVAVGVIKAVDKK	KTKKKRGSYRGGSISV	RDMRQTVAVGVIKAVD
AEFARSLLVIPNTLAV	VRNRKVVDYSQFQESD	MRQTVAVGVIKAVDKK
FPLATYAPVISAEKAY	SRPSSSRSYVTTSTRT	AEFARSLLVIPNTLAV
SSMSGYDQVLQENSSD	ENLKKTPKKKMKMVTG	FPLATYAPVISAEKAY
MASLSLAPVNIFKAGA	AAVVEFQRAQSLLSTD	SSMSGYDQVLQENSSD
YPPLGRFAVRDMRQTV	VDTPSGTNSGAGKKRF	MASLSLAPVNIFKAGA
LGGQDQLRVRVTELED	SSGQVTSNGSIGRDPP	YPPLGRFAVRDMRQTV
VRSIQEAPVSEDLVIR	RFAGKVTTASVKERRE	LGGQDQLRVRVTELED
IRYVERSYVSKPTLKE	FAGKVTTASVKERREI	VVQPLLVSVSALTLAT
SSQEGTTVVSSGITGI	EEAREKMLAAKSADGS	VRSIQEAPVSEDLVIR
ELVVQPLLVSVSALTL	EAREKMLAAKSADGSA	IRYVERSYVSKPTLKE
GQDQLRVRVTELEDEV	LSAPPHFHFGQTNRTP	SSQEGTTVVSSGITGI
RDLPTIPGVTSPSSDE	EIKMEEESGAPGVPSG	ELVVQPLLVSVSALTL
RPSSSRSYVTTSTRTY	LRIDDLIKLHPESKDD	GQDQLRVRVTELEDEV
KGIIDPTKVVRTALLD	DDLIKLHPESKDDKHG	DVAGKPNEVTKAAESP
DDDLGSSNWEAADLGN	HHEEEIVHHKKEIERL	RDLPTIPGVTSPSSDE
LAPHLTRAYAKDVKFG	QKDVQTYYGQVLKRSA	RPSSSRSYVTTSTRTY
RPSTSRSLYASSPGGV	KDVQTYYGQVLKRSAD	KGIIDPTKVVRTALLD
LSTVGAGAYAYKTMKE	TYYGQVLKRSADLQTN	DDDLGSSNWEAADLGN
AYGTRRHLYDPKMQTD	AAAPAKVEAKEESEES	LAPHLTRAYAKDVKFG
SKDDKHGSYEDAVHSG	PAISVSVSAPAFYAPQ	RPSTSRSLYASSPGGV
NTQPIPILYEHQLGQA	VSVSAPAFYAPQKKFG	AYGTRRHLYDPKMQTD
TSRSLALMYESEKVGV	KKAFTELQAKVIDTQQ	SKDDKHGSYEDAVHSG
GSEISDSDYQAEYPDE	EVRSRVVGGSLRGAQA	NTQPIPILYEHQLGQA
PKKEDALLYQSKGYND	IQVQHVQAAQQIQAAE	TSRSLALMYESEKVGV
IGYMGQTAYQYPPPPP	VQHVQAAQQIQAAEIP	QPELSQDSYLGDEFKS
GDPRAIVEYRDLDAPD	QIQAQLVAGQSLAGGQ	GSEISDSDYQAEYPDE
KTKKKRGSYRGGSISV	AQLVAGQSLAGGQQIQ	PKKEDALLYQSKGYND
ENLKKTPKKKMKMVTG	AATGRIVAVIGAVVDV	IGYMGQTAYQYPPPPP
AAVVEFQRAQSLLSTD	VLRTNLGPKGTMKMLV	GDPRAIVEYRDLDAPD
NHDPQFEPIVSLPEQE	RSTAPSAAASASASAA	KTKKKRGSYRGGSISV
VDTPSGTNSGAGKKRF	AAAVPSSGSGVGGGGT	VRNRKVVDYSQFQESD
SETLKRFAGKVTTASV	SQAVEEMRSRVVLGEF	SRPSSSRSYVTTSTRT
RFAGKVTTASVKERRE	QAVEEMRSRVVLGEFG	ENLKKTPKKKMKMVTG
FAGKVTTASVKERREI	SRVVLGEFGVRNVHTT	AAVVEFQRAQSLLSTD
EEAREKMLAAKSADGS	KENVQPLRQGRIMSTL	NHDPQFEPIVSLPEQE
EAREKMLAAKSADGSA	TLNPKAEVARAQAALA	VDTPSGTNSGAGKKRF
LSAPPHFHFGQTNRTP	KAEVARAQAALAVNIS	SSGQVTSNGSIGRDPP
LRIDDLIKLHPESKDD	AEVARAQAALAVNISA	SETLKRFAGKVTTASV
DDLIKLHPESKDDKHG	EVARAQAALAVNISAA	ETLKRFAGKVTTASVK
RGLQDVLRTNLGPKGT	VARAQAALAVNISAAR	RFAGKVTTASVKERRE
HHEEEIVHHKKEIERL	AQAALAVNISAARGLQ	FAGKVTTASVKERREI
QKDVQTYYGQVLKRSA	EVSVDGLTLSPDPEER	EEAREKMLAAKSADGS
KDVQTYYGQVLKRSAD	ASRMEEVD________	EAREKMLAAKSADGSA
TYYGQVLKRSADLQTN	EEDRSKLRSVSVDLNV	QQKQEPLGSDSEGVNC
AAAPAKVEAKEESEES	AAEVKVDGSEPKLSKN	LSAPPHFHFGQTNRTP
PAISVSVSAPAFYAPQ	SEPKLSKNELKRRLKA	EIKMEEESGAPGVPSG
VSVSAPAFYAPQKKFG	RTRISLLQREAAQAMY	LRIDDLIKLHPESKDD
KKAFTELQAKVIDTQQ	APYKKDENKLSSANGH	DDLIKLHPESKDDKHG
EVRSRVVGGSLRGAQA	KKDENKLSSANGHEER	RGLQDVLRTNLGPKGT
IQVQHVQAAQQIQAAE	KDENKLSSANGHEERS	HHEEEIVHHKKEIERL
VQHVQAAQQIQAAEIP	ENKLSSANGHEERSKK	QKDVQTYYGQVLKRSA
PEEHIPHQQIQAQLVA	ALRRQRLAELQAKHGD	KDVQTYYGQVLKRSAD
QIQAQLVAGQSLAGGQ	RQRLAELQAKHGDPGD	TYYGQVLKRSADLQTN
AQLVAGQSLAGGQQIQ	PVKTKTVSSSNGGESS	AAAPAKVEAKEESEES
AATGRIVAVIGAVVDV	DSRERRAPRRTRVNGD	PAISVSVSAPAFYAPQ
VLRTNLGPKGTMKMLV	DSVEAAKNASNTEKLT	KKAFTELQAKVIDTQQ
RSTAPSAAASASASAA	EAAKNASNTEKLTDQV	EVRSRVVGGSLRGAQA
STAPSAAASASASAAA	MQNPRVLAALQERLDN	IQVQHVQAAQQIQAAE
AAAVPSSGSGVGGGGT	KLKARQLTVQMMQNPQ	VQHVQAAQQIQAAEIP
SQAVEEMRSRVVLGEF	SLDELIRKRGAAAKGR	QAAQQIQAAEIPEEHI
SRVVLGEFGVRNVHTT	ELIRKRGAAAKGRLNA	PEEHIPHQQIQAQLVA
KENVQPLRQGRIMSTL	LIRKRGAAAKGRLNAR	QIQAQLVAGQSLAGGQ
NVQPLRQGRIMSTLQG	IRKRGAAAKGRLNARP	AQLVAGQSLAGGQQIQ
TLNPKAEVARAQAALA	KRGAAAKGRLNARPGV	AATGRIVAVIGAVVDV
AEVARAQAALAVNISA	LDDIIKLNRSQRGGRG	VLRTNLGPKGTMKMLV
EVARAQAALAVNISAA	AKLKKTETQEKNTLPT	RSTAPSAAASASASAA
VARAQAALAVNISAAR	EERKQKFLRLMGAGKK	AAAVPSSGSGVGGGGT
ARAQAALAVNISAARG	ERKQKFLRLMGAGKKE	SQAVEEMRSRVVLGEF
AQAALAVNISAARGLQ	RKQKFLRLMGAGKKEH	QAVEEMRSRVVLGEFG
EVSVDGLTLSPDPEER	QKFLRLMGAGKKEHTG	SRVVLGEFGVRNVHTT
ASRMEEVD________	EKLDNQRLKNFKNKGR	KENVQPLRQGRIMSTL
EEDRSKLRSVSVDLNV	QRLKNFKNKGRDLETM	NVQPLRQGRIMSTLQG
SEPKLSKNELKRRLKA	LTAASTAPISFGFTRT	TLNPKAEVARAQAALA
RTRISLLQREAAQAMY	AASTAPISFGFTRTSA	AEVARAQAALAVNISA
APYKKDENKLSSANGH	DVTARSLQYEYKANSN	EVARAQAALAVNISAA
KKDENKLSSANGHEER	SLQYEYKANSNLVLQA	VARAQAALAVNISAAR
KDENKLSSANGHEERS	ANSNLVLQADRSLIDR	AQAALAVNISAARGLQ
ENKLSSANGHEERSKK	GETVGKTDYIPLLDVD	EVSVDGLTLSPDPEER
ALRRQRLAELQAKHGD	VGKTDYIPLLDVDEKT	EEDRSKLRSVSVDLNV
RQRLAELQAKHGDPGD	KTDYIPLLDVDEKTGN	AAEVKVDGSEPKLSKN
YDDRAYSSFGGGRGSR	ETKIKNYKTAPFDSRF	SEPKLSKNELKRRLKA
PVKTKTVSSSNGGESS	GQLVGVDLNTGEPMVA	RTRISLLQREAAQAMY
DSRERRAPRRTRVNGD	RQIAAKIDSIPHLNNS	APYKKDENKLSSANGH
DSVEAAKNASNTEKLT	ENPSLENHRIKSFKNK	KKDENKLSSANGHEER
EAAKNASNTEKLTDQV	VQRTLLEK________	KDENKLSSANGHEERS
MQNPRVLAALQERLDN	QKLINPVKTSRNHQDL	ENKLSSANGHEERSKK
KLKARQLTVQMMQNPQ	EYQHQPQTSNCTGAAA	ALRRQRLAELQAKHGD
SLDELIRKRGAAAKGR	PPPEPARI________	RQRLAELQAKHGDPGD
ELIRKRGAAAKGRLNA	ATQSHSISSSSFGAEP	PVKTKTVSSSNGGESS
LIRKRGAAAKGRLNAR	QVALSRTQVCGILREE	DSRERRAPRRTRVNGD
IRKRGAAAKGRLNARP	WDTVTVLRKKGPTAAQ	EAAKNASNTEKLTDQV
KRGAAAKGRLNARPGV	DTVTVLRKKGPTAAQA	MQNPRVLAALQERLDN
LDDIIKLNRSQRGGRG	TVLRKKGPTAAQAKSK	KLKARQLTVQMMQNPQ
AKLKKTETQEKNTLPT	TEERSLDNFFAKRDKK	SLDELIRKRGAAAKGR
EERKQKFLRLMGAGKK	EERSLDNFFAKRDKKK	ELIRKRGAAAKGRLNA
ERKQKFLRLMGAGKKE	ERSLDNFFAKRDKKKK	LIRKRGAAAKGRLNAR
QKFLRLMGAGKKEHTG	DNFFAKRDKKKKKERS	IRKRGAAAKGRLNARP
EKLDNQRLKNFKNKGR	NFFAKRDKKKKKERSN	KRGAAAKGRLNARPGV
LDNQRLKNFKNKGRDL	FFAKRDKKKKKERSNR	LDDIIKLNRSQRGGRG
DNQRLKNFKNKGRDLE	FAKRDKKKKKERSNRA	AKLKKTETQEKNTLPT
QRLKNFKNKGRDLETM	ETVADTRRLITKPQNL	EERKQKFLRLMGAGKK
LTAASTAPISFGFTRT	LKRLQSQKGVQGIIVV	ERKQKFLRLMGAGKKE
AASTAPISFGFTRTSA	KTEERRVERDILKEMF	RKQKFLRLMGAGKKEH
DVTARSLQYEYKANSN	VLISDSLDPCCRKILQ	QKFLRLMGAGKKEHTG
SLQYEYKANSNLVLQA	RAVETTAQSDNKITWS	EKLDNQRLKNFKNKGR
ANSNLVLQADRSLIDR	KLDPELDS________	LDNQRLKNFKNKGRDL
GETVGKTDYIPLLDVD	EAEAMNYEGSPIKVTL	DNQRLKNFKNKGRDLE
VGKTDYIPLLDVDEKT	ASEKESVM________	QRLKNFKNKGRDLETM
KTDYIPLLDVDEKTGN	GLGLEFQA________	LTAASTAPISFGFTRT
ETKIKNYKTAPFDSRF	GLALELEA________	AASTAPISFGFTRTSA
GQLVGVDLNTGEPMVA	SAQKAQKAK_______	DVTARSLQYEYKANSN
LSVAEITNACFEPANQ	SKAIGSSPLGSGEGLL	SLQYEYKANSNLVLQA
RQIAAKIDSIPHLNNS	ELDAQLDAYNARMDTS	ANSNLVLQADRSLIDR
ENPSLENHRIKSFKNK	FEDADVDH________	GETVGKTDYIPLLDVD
VQRTLLEK________	APAIESVD________	VGKTDYIPLLDVDEKT
QKLINPVKTSRNHQDL	NLESMDTS________	KTDYIPLLDVDEKTGN
PPPEPARI________	LTKLHQLAMQQSHFPM	ETKIKNYKTAPFDSRF
ATQSHSISSSSFGAEP	KFGADARALMLQGVDL	GQLVGVDLNTGEPMVA
QVALSRTQVCGILREE	DARALMLQGVDLLADA	LSVAEITNACFEPANQ
WDTVTVLRKKGPTAAQ	EAQIREIQGKKAALDE	RQIAAKIDSIPHLNNS
DTVTVLRKKGPTAAQA	AQIREIQGKKAALDEA	ENPSLENHRIKSFKNK
TVLRKKGPTAAQAKSK	KPKAAKPKKAAAKKK_	VQRTLLEK________
TEERSLDNFFAKRDKK	EERADATNVNNWHWTE	QKLINPVKTSRNHQDL
EERSLDNFFAKRDKKK	RADATNVNNWHWTERD	EYQHQPQTSNCTGAAA
ERSLDNFFAKRDKKKK	ALEIANAHRKPLVIIA	PPPEPARI________
DNFFAKRDKKKKKERS	HEEEIVHHKKEIERLQ	ATQSHSISSSSFGAEP
NFFAKRDKKKKKERSN	ELSDLARDPPAQCSAG	QVALSRTQVCGILREE
FFAKRDKKKKKERSNR	KEDAEEKQ________	WDTVTVLRKKGPTAAQ
FAKRDKKKKKERSNRA	AVAAELVSADKIEDVP	TVLRKKGPTAAQAKSK
ETVADTRRLITKPQNL	FGDLGRPGRGGRGGRG	TEERSLDNFFAKRDKK
LKRLQSQKGVQGIIVV	PFEVKVNRQKFQILGR	EERSLDNFFAKRDKKK
KTEERRVERDILKEMF	FEVKVNRQKFQILGRK	ERSLDNFFAKRDKKKK
VLISDSLDPCCRKILQ	AEEKKDEKKEESEESD	DNFFAKRDKKKKKERS
RAVETTAQSDNKITWS	GAVATKVRRHDMRVHP	NFFAKRDKKKKKERSN
KLDPELDS________	DRVGQTIERMGSGVER	FFAKRDKKKKKERSNR
EAEAMNYEGSPIKVTL	EDLLLQDFSRNLSAKS	FAKRDKKKKKERSNRA
ASEKESVM________	QDFSRNLSAKSSALFF	ETVADTRRLITKPQNL
GLGLEFQA________	QGQLVARPSSINYMVA	LKRLQSQKGVQGIIVV
GLALELEA________	TTEVKSVEMHHEALSE	KTEERRVERDILKEMF
SKGGPLQALTRESTRG	EQRSTQTRRYPSSISS	VLISDSLDPCCRKILQ
DEVRTGTYRQLFHPEQ	GGALGHHV________	RAVETTAQSDNKITWS
SAQKAQKAK_______	AVIQHRPSRQYATLDV	KLDPELDS________
SKAIGSSPLGSGEGLL	QHRPSRQYATLDVYNP	EAEAMNYEGSPIKVTL
ELDAQLDAYNARMDTS	LFTSKGLFRAAVPSGA	ASEKESVM________
FEDADVDH________	DTQFPSLQSTAKHVES	GLGLEFQA________
APAIESVD________	EVVQKEQE________	GLALELEA________
NLESMDTS________	AVKEENLKLKSENQVL	SKGGPLQALTRESTRG
TTETTKTARATGASRD	HEQILVLDPPTDLKFK	DEVRTGTYRQLFHPEQ
LTKLHQLAMQQSHFPM	TAILKQKNRPNRLIVD	SKAIGSSPLGSGEGLL
KFGADARALMLQGVDL	GGGGKIRTRRCHQGPI	ELDAQLDAYNARMDTS
DARALMLQGVDLLADA	GGGKIRTRRCHQGPIK	FEDADVDH________
EAQIREIQGKKAALDE	FKKKTVDDVIKEQNRE	APAIESVD________
AQIREIQGKKAALDEA	IKEQNRELRGTQRAII	NLESMDTS________
KPKAAKPKKAAAKKK_	KEQNRELRGTQRAIIR	TTETTKTARATGASRD
EERADATNVNNWHWTE	EQNRELRGTQRAIIRD	LTKLHQLAMQQSHFPM
RADATNVNNWHWTERD	EERAETARLTSFIGAI	KFGADARALMLQGVDL
ALEIANAHRKPLVIIA	RAETARLTSFIGAIAI	DARALMLQGVDLLADA
HEEEIVHHKKEIERLQ	AETARLTSFIGAIAIG	EAQIREIQGKKAALDE
ELSDLARDPPAQCSAG	ARLTSFIGAIAIGDLV	AQIREIQGKKAALDEA
KKLNFDQA________	TQQATQSYGAYPTQPG	KPKAAKPKKAAAKKK_
KEDAEEKQ________	QQATQSYGAYPTQPGQ	EERADATNVNNWHWTE
AVAAELVSADKIEDVP	EILLTELQGDSRSLPF	RADATNVNNWHWTERD
VTERVLAPASTLQSSY	VKELEKRASGQAFELI	ALEIANAHRKPLVIIA
FGDLGRPGRGGRGGRG	KELEKRASGQAFELIL	HEEEIVHHKKEIERLQ
PFEVKVNRQKFQILGR	ELEKRASGQAFELILS	ELSDLARDPPAQCSAG
FEVKVNRQKFQILGRK	EKRASGQAFELILSPR	KKLNFDQA________
AEEKKDEKKEESEESD	KRASGQAFELILSPRS	KEDAEEKQ________
GAVATKVRRHDMRVHP	RASGQAFELILSPRSK	AVAAELVSADKIEDVP
DRVGQTIERMGSGVER	SGQAFELILSPRSKES	VTERVLAPASTLQSSY
EDLLLQDFSRNLSAKS	GQAFELILSPRSKESV	FGDLGRPGRGGRGGRG
QDFSRNLSAKSSALFF	EIETLDDY________	PFEVKVNRQKFQILGR
QGQLVARPSSINYMVA	DSKRGEAPFAQRIDPT	FEVKVNRQKFQILGRK
ASPVAPSAASFSFGSS	SVLVLIVGLSTVGAGA	AEEKKDEKKEESEESD
TTEVKSVEMHHEALSE	VYATRSSAVRLRSSVP	GAVATKVRRHDMRVHP
EQRSTQTRRYPSSISS	ATRSSAVRLRSSVPGV	DRVGQTIERMGSGVER
GGALGHHV________	AAQQGYSAYTAQPTQG	EDLLLQDFSRNLSAKS
AVIQHRPSRQYATLDV	QGYAQTTQAYGQQSYG	QDFSRNLSAKSSALFF
VIQHRPSRQYATLDVY	GEEAEEEA________	QGQLVARPSSINYMVA
QHRPSRQYATLDVYNP	EEAEEEVA________	ASPVAPSAASFSFGSS
LFTSKGLFRAAVPSGA	KEVYELLDSPGKVLLQ	TLSGGGDQREAQTLDS
DTQFPSLQSTAKHVES	IDDVVNTR________	TTEVKSVEMHHEALSE
EVVQKEQE________	PLDFPSKKRKRSRWNQ	EQRSTQTRRYPSSISS
AVKEENLKLKSENQVL	AAVSHWQQQSYLDSGI	GGALGHHV________
HEQILVLDPPTDLKFK	AVSHWQQQSYLDSGIH	AVIQHRPSRQYATLDV
TAILKQKNRPNRLIVD	EEHGGLVRKKPPPAPE	VIQHRPSRQYATLDVY
GGGGKIRTRRCHQGPI	LEENEAGD________	QHRPSRQYATLDVYNP
GGGKIRTRRCHQGPIK	PTVIDEVRTGTYRQLF	LFTSKGLFRAAVPSGA
LAAKKGLDPYNVLAPK	DEVRTGTYRQLFHPEQ	DTQFPSLQSTAKHVES
VFNDMKVRKSSTPEEV	VKVPQKNS________	EVVQKEQE________
FKKKTVDDVIKEQNRE	EEGFEGGD________	AVKEENLKLKSENQVL
IKEQNRELRGTQRAII	EKSLKSLKDKNKKLEE	HEQILVLDPPTDLKFK
KEQNRELRGTQRAIIR	AKTGKFLKRFTDEESR	TAILKQKNRPNRLIVD
EQNRELRGTQRAIIRD	KDEPQRRSARLSAKPA	GGGGKIRTRRCHQGPI
EERAETARLTSFIGAI	DILGKYVD________	GGGKIRTRRCHQGPIK
RAETARLTSFIGAIAI	EAMNEIRAKKRLRQSG	LAAKKGLDPYNVLAPK
AETARLTSFIGAIAIG	PEAFPALA________	VFNDMKVRKSSTPEEV
ARLTSFIGAIAIGDLV	DVKFGADARALMLQGV	FKKKTVDDVIKEQNRE
TQQATQSYGAYPTQPG	VANKIGII________	IKEQNRELRGTQRAII
QQATQSYGAYPTQPGQ	SSSHSDLGQLASQGGL	KEQNRELRGTQRAIIR
EILLTELQGDSRSLPF	ARSIAKEGFEKISKGA	EQNRELRGTQRAIIRD
VKELEKRASGQAFELI	DAEAPGIRDHESL___	EERAETARLTSFIGAI
KELEKRASGQAFELIL	GIRDHESL________	RAETARLTSFIGAIAI
ELEKRASGQAFELILS	EIKDFLLTARRKDAKS	AETARLTSFIGAIAIG
EKRASGQAFELILSPR	ARNSLYDMARYEREQY	ARLTSFIGAIAIGDLV
KRASGQAFELILSPRS	HIEEVRKNKESKDPAD	QQATQSYGAYPTQPGQ
RASGQAFELILSPRSK	SPGKVLLQSKDQITAG	EILLTELQGDSRSLPF
SGQAFELILSPRSKES	TGKEDAANNYARGHYT	VKELEKRASGQAFELI
GQAFELILSPRSKESV	GKEDAANNYARGHYTI	KELEKRASGQAFELIL
ESVPEFPLSPPKKKDL	LLGRVGQDPVLRQVEG	ELEKRASGQAFELILS
EIETLDDY________	QEKLAKLQAQVRIGGK	EKRASGQAFELILSPR
DSKRGEAPFAQRIDPT	QVINETSQHHDDLE__	KRASGQAFELILSPRS
ATRSSAVRLRSSVPGV	KQEPDPTW________	RASGQAFELILSPRSK
AAQQGYSAYTAQPTQG	KEHDPVGQMVNNPKIH	SGQAFELILSPRSKES
QGYAQTTQAYGQQSYG	AIHSPQVAGVPRFRFG	GQAFELILSPRSKESV
GEEAEEEA________	GPGTASRPSSSRSYVT	EIETLDDY________
KEVYELLDSPGKVLLQ	PGTASRPSSSRSYVTT	DSKRGEAPFAQRIDPT
DELATKLSRRLQMEGE	GTASRPSSSRSYVTTS	SVLVLIVGLSTVGAGA
TPEQPGLNGAAAAAAG	QAKARPENKQHKQTLS	ATRSSAVRLRSSVPGV
KVKADTNGIIKTSTTA	TYQGERAYQHGGVTGL	AAQQGYSAYTAQPTQG
IDDVVNTR________	DENEHQLSLRTVSLGA	QGYAQTTQAYGQQSYG
PLDFPSKKRKRSRWNQ	NEHQLSLRTVSLGAGA	GEEAEEEA________
AAVSHWQQQSYLDSGI	GGLGGGLGNVLGGLIS	DELATKLSRRLQMEGE
AVSHWQQQSYLDSGIH	GGLGNVLGGLISGAGG	KVKADTNGIIKTSTTA
EEHGGLVRKKPPPAPE	EDLNQLIKRYSSEVAT	IDDVVNTR________
LEENEAGD________	GRDSGPPTKKIRSSPR	PLDFPSKKRKRSRWNQ
RIERIGAHSHIRGLGL	RDSGPPTKKIRSSPRE	AAVSHWQQQSYLDSGI
PTVIDEVRTGTYRQLF	DSGPPTKKIRSSPREA	AVSHWQQQSYLDSGIH
VKVPQKNS________	SGPPTKKIRSSPREAK	EEHGGLVRKKPPPAPE
EEGFEGGD________	GPPTKKIRSSPREAKN	LEENEAGD________
EKSLKSLKDKNKKLEE	SESTPIAETIMASSNE	RIERIGAHSHIRGLGL
AKTGKFLKRFTDEESR	INEELESQYQQSMDSK	PTVIDEVRTGTYRQLF
KDEPQRRSARLSAKPA	QEGKNVIGLQMGTNRG	VKVPQKNS________
DILGKYVD________	IGLQMGTNRGASQAGM	EEGFEGGD________
EAMNEIRAKKRLRQSG	SQNARHLQGGEKQRVF	EKSLKSLKDKNKKLEE
PEAFPALA________	TEQPVRKNKMASNIFG	AKTGKFLKRFTDEESR
DVKFGADARALMLQGV	EQPVRKNKMASNIFGT	KDEPQRRSARLSAKPA
VANKIGII________	VRKNKMASNIFGTPEE	DILGKYVD________
SSSHSDLGQLASQGGL	TEQVNGLF________	EAMNEIRAKKRLRQSG
ARSIAKEGFEKISKGA	HTGRLVIGDHKSTSHF	DVKFGADARALMLQGV
DAEAPGIRDHESL___	AEGAGDAK________	VANKIGII________
GIRDHESL________	DWNDREWDRGRERRSR	SSSHSDLGQLASQGGL
EIKDFLLTARRKDAKS	AAEDDEDDDVDTKKQK	ARSIAKEGFEKISKGA
ARNSLYDMARYEREQY	SDSNLHDA________	DAEAPGIRDHESL___
HIEEVRKNKESKDPAD	ERFDGMLLAMAQQHEG	GIRDHESL________
EELGLDKV________	SQASAAARNSLYDMAR	EIKDFLLTARRKDAKS
SPGKVLLQSKDQITAG	SQIQETSI________	HIEEVRKNKESKDPAD
TGKEDAANNYARGHYT	GLAVKELK________	EELGLDKV________
GKEDAANNYARGHYTI	TSSTRVTKHSTVQHSY	SPGKVLLQSKDQITAG
LLGRVGQDPVLRQVEG	MVGLANLHAMGIAPPK	TGKEDAANNYARGHYT
QEKLAKLQAQVRIGGK	KEEIDILSDACSKLQE	GKEDAANNYARGHYTI
QVINETSQHHDDLE__	GSRNMGGPYGGGNYGP	LLGRVGQDPVLRQVEG
KQEPDPTW________	DDWNGTRPSLKAPPAR	QVINETSQHHDDLE__
KEHDPVGQMVNNPKIH	ISLEGKPL________	KQEPDPTW________
AIHSPQVAGVPRFRFG	SRQLYVLGHEAMKRLQ	KEHDPVGQMVNNPKIH
GPGTASRPSSSRSYVT	GSEFVQKYLGEGPRMV	AIHSPQVAGVPRFRFG
PGTASRPSSSRSYVTT	AQSAGTVRSAAPPQEK	GPGTASRPSSSRSYVT
GTASRPSSSRSYVTTS	PEKTQESL________	PGTASRPSSSRSYVTT
QAKARPENKQHKQTLS	NVADSPRNKKEKSS__	GTASRPSSSRSYVTTS
TYQGERAYQHGGVTGL	DNSTISLQMGTNKVAS	QAKARPENKQHKQTLS
DENEHQLSLRTVSLGA	GMTGYGMPRQIL____	TYQGERAYQHGGVTGL
NEHQLSLRTVSLGAGA	GVFDLINKAKWDAWNA	DENEHQLSLRTVSLGA
GGLGGGLGNVLGGLIS	IKAVDKKAAGAGKVTK	NEHQLSLRTVSLGAGA
GGLGNVLGGLISGAGG	DSVDFSLADAINTEFK	GGLGGGLGNVLGGLIS
GRDSGPPTKKIRSSPR	SVDFSLADAINTEFKN	GGLGNVLGGLISGAGG
RDSGPPTKKIRSSPRE	FSLADAINTEFKNTRT	EDLNQLIKRYSSEVAT
DSGPPTKKIRSSPREA	EGPSDIPD________	GRDSGPPTKKIRSSPR
SGPPTKKIRSSPREAK	VDGLPDLGHAQDLMDG	RDSGPPTKKIRSSPRE
GPPTKKIRSSPREAKN	LSVAEITNACFEPANQ	DSGPPTKKIRSSPREA
SESTPIAETIMASSNE	GDSDLQLERINVYYNE	SGPPTKKIRSSPREAK
PIAETIMASSNESLVV	LERINVYYNEATGGKY	GPPTKKIRSSPREAKN
INEELESQYQQSMDSK	GDSDLQLDRISVYYNE	SESTPIAETIMASSNE
QEGKNVIGLQMGTNRG	PADETEAD________	PIAETIMASSNESLVV
SQNARHLQGGEKQRVF	PKMQTDKPFDQTTISL	INEELESQYQQSMDSK
PTEQPVRKNKMASNIF	QGLLSQLQGQSKDMPP	QEGKNVIGLQMGTNRG
TEQPVRKNKMASNIFG	DAQNPQIKRITDKADT	SQNARHLQGGEKQRVF
EQPVRKNKMASNIFGT	TEFSDIPRRAPKKPLT	INTEFKNTRTNEKVEL
VRKNKMASNIFGTPEE	SLAEDDVE________	TEQPVRKNKMASNIFG
HTGRLVIGDHKSTSHF	AGKVTKSAQKAQKAK_	EQPVRKNKMASNIFGT
AEGAGDAK________	GKVTKSAQKAQKAK__	VRKNKMASNIFGTPEE
DWNDREWDRGRERRSR	AEKSRGLFSANDWQCK	TEQVNGLF________
SDSNLHDA________	GEEEGEEY________	HTGRLVIGDHKSTSHF
ERFDGMLLAMAQQHEG	VTKSAQKAQKAK____	AEGAGDAK________
DGMLLAMAQQHEGGVQ	TKSAQKAQKAK_____	DWNDREWDRGRERRSR
SQASAAARNSLYDMAR	EDKTFGLKNKKGAKQQ	AAEDDEDDDVDTKKQK
SQIQETSI________	GDELRTEPEAKKSKTA	SDSNLHDA________
GLAVKELK________	PKEEESPV________	ERFDGMLLAMAQQHEG
TSSTRVTKHSTVQHSY	EQDVEKKK________	DGMLLAMAQQHEGGVQ
MVGLANLHAMGIAPPK	GAVFDHPAKIAKSTKS	SQASAAARNSLYDMAR
KEEIDILSDACSKLQE	PIAETIMASSNESLVV	GLAVKELK________
GSRNMGGPYGGGNYGP	AAIVDMVPGKPMCVES	TSSTRVTKHSTVQHSY
KLPEMDID________	DKYKNIGAKLVQDVAN	MVGLANLHAMGIAPPK
DDWNGTRPSLKAPPAR	SEEDVSSRYSRTDRSG	KEEIDILSDACSKLQE
ISLEGKPL________	IHATTYIPLMDNADSS	GSRNMGGPYGGGNYGP
SRQLYVLGHEAMKRLQ	GKKKDKSD________	KLPEMDID________
GSEFVQKYLGEGPRMV	GAAKEEPKRRSARLSA	DDWNGTRPSLKAPPAR
AQSAGTVRSAAPPQEK	GTPPTAANYPSSSRTP	ISLEGKPL________
PEKTQESL________	AVRAGVREKRRGRGTG	SRQLYVLGHEAMKRLQ
NVADSPRNKKEKSS__	LAPASTLQSSYQIPTE	GSEFVQKYLGEGPRMV
DNSTISLQMGTNKVAS	LAKLNQVARQQSHFAM	AQSAGTVRSAAPPQEK
GMTGYGMPRQIL____	ARQQSHFAMMHGGTGF	NVADSPRNKKEKSS__
GVFDLINKAKWDAWNA	KSSHSQYN________	DNSTISLQMGTNKVAS
IKAVDKKAAGAGKVTK	VVSVVTPGCNQLPTLE	GMTGYGMPRQIL____
DSVDFSLADAINTEFK	ADSQPPVFKVFPGSTT	GVFDLINKAKWDAWNA
SVDFSLADAINTEFKN	SQIKQEPDPTW_____	IKAVDKKAAGAGKVTK
FSLADAINTEFKNTRT	KERELELKNTWSENKL	DSVDFSLADAINTEFK
EGPSDIPD________	GQVINETSQHHDDLE_	SVDFSLADAINTEFKN
VDGLPDLGHAQDLMDG	VINETSQHHDDLE___	FSLADAINTEFKNTRT
GDSDLQLERINVYYNE	SQHHDDLE________	EGPSDIPD________
GDSDLQLDRISVYYNE	EKEAADRKRKQEEQME	VDGLPDLGHAQDLMDG
DLQLERINVYYNEATG	DKGKNVRQRNSS____	GDSDLQLERINVYYNE
PADETEAD________	DSLIKGKK________	LERINVYYNEATGGKY
PKMQTDKPFDQTTISL	ADAVAVTMGPKGRTVI	GDSDLQLDRISVYYNE
QGLLSQLQGQSKDMPP	QTVVGTYHGSPDQSHQ	DLQLERINVYYNEATG
DAQNPQIKRITDKADT	SHQVTGNHQQPPQQNT	PADETEAD________
TEFSDIPRRAPKKPLT	YNARMDTS________	PKMQTDKPFDQTTISL
SLAEDDVE________	GHGRDLSAAGIGLLAA	QGLLSQLQGQSKDMPP
AGKVTKSAQKAQKAK_	DSEKNESRRNLELPRL	DAQNPQIKRITDKADT
GKVTKSAQKAQKAK__	PVQATQNKTGKYVPPS	PSLRQLAQKYNCDKMI
AEKSRGLFSANDWQCK	DEVERVITIMQNPRQY	TEFSDIPRRAPKKPLT
GEDEGEEY________	KEKAEKLKQSLPPGLA	SLAEDDVE________
GEEEGEEY________	GDLKQALPCVAESPTV	AGKVTKSAQKAQKAK_
KDFLLTARRKDAKSVK	VQLTEIKPLLNDKNGT	GKVTKSAQKAQKAK__
TKSAQKAQKAK_____	EEERAQRPRLQLKPRT	AEKSRGLFSANDWQCK
AQKAQKAK________	RAQRPRLQLKPRTVAT	GEDEGEEY________
EDKTFGLKNKKGAKQQ	PDIAVGTKRGSDELFS	GEEEGEEY________
GDELRTEPEAKKSKTA	KTGALLLQGFIQDRAG	QEKLAKLQAQVRIGGK
ADEISLRPAQSFLMNK	ESTRRILGLAIESQDA	KDFLLTARRKDAKSVK
PKEEESPV________	ERRQQVLDRYHRFKEL	TKSAQKAQKAK_____
EQDVEKKK________	KGAATSVSNPRGRPSR	EDKTFGLKNKKGAKQQ
GAVFDHPAKIAKSTKS	VSNPRGRPSRGRPPKL	GDELRTEPEAKKSKTA
AAIVDMVPGKPMCVES	SNPRGRPSRGRPPKLQ	ADEISLRPAQSFLMNK
SEEDVSSRYSRTDRSG	ASIANIVKSSLGPVGL	PKEEESPV________
IHATTYIPLMDNADSS	QVARTHLTEDTPKVNA	EQDVEKKK________
KTTRTPEEGGYSYDIS	VARTHLTEDTPKVNAD	GGAVFDHPAKIAKSTK
GKKKDKSD________	NEKINAEKSSKQKVDL	GAVFDHPAKIAKSTKS
GAAKEEPKRRSARLSA	RFVVTAPPARNRSKTA	AAIVDMVPGKPMCVES
GTPPTAANYPSSSRTP	GGASRFSASSGGGGSR	SEEDVSSRYSRTDRSG
AVRAGVREKRRGRGTG	TNWSDVGKRKVEINPP	IHATTYIPLMDNADSS
LAPASTLQSSYQIPTE	SDSSPAVENEHPQETP	KTTRTPEEGGYSYDIS
LAKLNQVARQQSHFAM	MFGGPGTASRPSSSRS	GKKKDKSD________
ARQQSHFAMMHGGTGF	FGGPGTASRPSSSRSY	GAAKEEPKRRSARLSA
KSSHSQYN________	TASRPSSSRSYVTTST	GTPPTAANYPSSSRTP
DVLVRQGD________	KNIPAGLQSMNQALQR	AVRAGVREKRRGRGTG
VVSVVTPGCNQLPTLE	YGMPRQIL________	LAKLNQVARQQSHFAM
ADSQPPVFKVFPGSTT	TIMNQEKLAKLQAQVR	ARQQSHFAMMHGGTGF
EEIKETDGSSQIKQEP	IMNQEKLAKLQAQVRI	KSSHSQYN________
SQIKQEPDPTW_____	EKLAKLQAQVRIGGKG	DVLVRQGD________
KERELELKNTWSENKL	FEEYIRVKARSVPQHR	VVSVVTPGCNQLPTLE
GQVINETSQHHDDLE_	LEKQNHTPRKHHQHHH	EEIKETDGSSQIKQEP
VINETSQHHDDLE___	EKQNHTPRKHHQHHHQ	SQIKQEPDPTW_____
SQHHDDLE________	KQNHTPRKHHQHHHQQ	KERELELKNTWSENKL
EKEAADRKRKQEEQME	MREIVHLQAGQCGNQI	GQVINETSQHHDDLE_
DKGKNVRQRNSS____	REIVHLQAGQCGNQIG	VINETSQHHDDLE___
KEHYQVLE________	SDFQSNIA________	SQHHDDLE________
EIPKEEKDPGMGAMGG	STSSHNLQSIFNIGSR	DKGKNVRQRNSS____
GGMGGGMF________	SGIESSSPEVKGYWGL	MALDQRFSRLPSKADT
DSLIKGKK________	ANGGLALASIEDQGAA	EIPKEEKDPGMGAMGG
ADAVAVTMGPKGRTVI	NMLLLKMNKDSKPPGN	GGMGGGMF________
SWGSPKVTKDGVTVAK	DVLVRQGD________	VTEWQQTYTYDSGIHS
QTVVGTYHGSPDQSHQ	PGSNLRTT________	DSLIKGKK________
SHQVTGNHQQPPQQNT	SDAMKKVGRKGVITVK	ADAVAVTMGPKGRTVI
GHGRDLSAAGIGLLAA	DDIDIDAI________	SWGSPKVTKDGVTVAK
DSEKNESRRNLELPRL	KLFVDKIREYKSKRQT	QTVVGTYHGSPDQSHQ
PVQATQNKTGKYVPPS	SSVCNILNDYGSQDSI	SHQVTGNHQQPPQQNT
KEKAEKLKQSLPPGLA	VTEWQQTYTYDSGIHS	YNARMDTS________
QTVNVDEN________	DAQFEMDI________	GHGRDLSAAGIGLLAA
GDLKQALPCVAESPTV	DTYGQQWK________	DSEKNESRRNLELPRL
VQLTEIKPLLNDKNGT	STRSLNYKSTSSGHRE	PVQATQNKTGKYVPPS
EEERAQRPRLQLKPRT	AVQSGKKKKKQKMVRA	DEVERVITIMQNPRQY
RAQRPRLQLKPRTVAT	VNFTSELRKHPSSPAR	KEKAEKLKQSLPPGLA
PDIAVGTKRGSDELFS	AKFWEVISDEHGIDPT	GDLKQALPCVAESPTV
KTGALLLQGFIQDRAG	HGIDPTGTYHGDSDLQ	VQLTEIKPLLNDKNGT
ERRQQVLDRYHRFKEL	GGYVGDSALQLERINV	EEERAQRPRLQLKPRT
KGAATSVSNPRGRPSR	SDPFEVLKAAENKKKE	RAQRPRLQLKPRTVAT
VSNPRGRPSRGRPPKL	EVLKAAENKKKEAGGG	PDIAVGTKRGSDELFS
SNPRGRPSRGRPPKLQ	EEDVTVQE________	KTGALLLQGFIQDRAG
ERNLQEIQQAGERLRS	EGYIERKAFLDRVDHR	ESTRRILGLAIESQDA
ASIANIVKSSLGPVGL	AIFGGARPREEVVQKE	ERRQQVLDRYHRFKEL
QVARTHLTEDTPKVNA	NDAPHKNTQEKFSLSQ	KGAATSVSNPRGRPSR
VARTHLTEDTPKVNAD	GEWKALKRKKFKK___	VSNPRGRPSRGRPPKL
NEKINAEKSSKQKVDL	ESQFEMDI________	SEEDRGLKAINVDLQS
GGASRFSASSGGGGSR	KGYWGLDASAQTTSHE	ASIANIVKSSLGPVGL
TNWSDVGKRKVEINPP	NSSTENEA________	QVARTHLTEDTPKVNA
SDSSPAVENEHPQETP	SDQTKEKE________	VARTHLTEDTPKVNAD
QRKESGKNKHSSGQQN	LLQDDISSSYTTTTTI	NEKINAEKSSKQKVDL
MFGGPGTASRPSSSRS	QDDISSSYTTTTTITA	RFVVTAPPARNRSKTA
FGGPGTASRPSSSRSY	SSYTTTTTITAPPSRV	GGASRFSASSGGGGSR
TASRPSSSRSYVTTST	SYTTTTTITAPPSRVL	TNWSDVGKRKVEINPP
KNIPAGLQSMNQALQR	YTTTTTITAPPSRVLQ	SDSSPAVENEHPQETP
YGMPRQIL________	QNGGDKLETMPLYLED	QRKESGKNKHSSGQQN
TIMNQEKLAKLQAQVR	GDKLETMPLYLEDDIR	MFGGPGTASRPSSSRS
IMNQEKLAKLQAQVRI	KLETMPLYLEDDIRPD	FGGPGTASRPSSSRSY
EKLAKLQAQVRIGGKG	AAGGRGKGAYQDRDKP	TASRPSSSRSYVTTST
GLELTELQNMTVPEDD	QIRFSNISAAKAVADA	KNIPAGLQSMNQALQR
FEEYIRVKARSVPQHR	DSEPFSNPLAPDGHDV	YGMPRQIL________
LEKQNHTPRKHHQHHH	NEDFRKLLMTPRAAPT	TIMNQEKLAKLQAQVR
EKQNHTPRKHHQHHHQ	MPEQTGEK________	IMNQEKLAKLQAQVRI
KQNHTPRKHHQHHHQQ	ELKVDEVKISSAVLKA	EKLAKLQAQVRIGGKG
MREIVHLQAGQCGNQI	AAGSTVRQRKNASCGT	FEEYIRVKARSVPQHR
REIVHLQAGQCGNQIG	VPRASVPDGFLSELTQ	LEKQNHTPRKHHQHHH
SDFQSNIA________	EAEQGGAE________	EKQNHTPRKHHQHHHQ
SGIESSSPEVKGYWGL	IKDFLLTARRKDAKSV	KQNHTPRKHHQHHHQQ
KKDSSQLGTDATKEKP	PEPEPVKEEKLSPEPI	MREIVHLQAGQCGNQI
ANGGLALASIEDQGAA	GTGSQAQPQPAANQAL	REIVHLQAGQCGNQIG
NMLLLKMNKDSKPPGN	QALAAGTHSSPVPGSI	SDFQSNIA________
PGSNLRTT________	LIDTHLLQARANLTQA	STSSHNLQSIFNIGSR
SDAMKKVGRKGVITVK	GVTGLSQY________	SGIESSSPEVKGYWGL
DDIDIDAI________	TPTLVVPHRTDGFAEA	KKDSSQLGTDATKEKP
KLFVDKIREYKSKRQT	FEPYLSPQARPNNAYT	ANGGLALASIEDQGAA
VTEWQQTYTYDSGIHS	PQARPNNAYTAMSDSY	NMLLLKMNKDSKPPGN
DAQFEMDI________	QARPNNAYTAMSDSYL	PGSNLRTT________
VIDKQDKD________	TLTQTADGRSSFDWLT	SDAMKKVGRKGVITVK
DTYGQQWK________	ADRAATGN________	DDIDIDAI________
STRSLNYKSTSSGHRE	SYFTTRTYGEPESAGP	KLFVDKIREYKSKRQT
AVQSGKKKKKQKMVRA	DKKAAGAGKVTKSAQK	SSVCNILNDYGSQDSI
VNFTSELRKHPSSPAR	SPPQTKDQ________	DAQFEMDI________
HGIDPTGTYHGDSDLQ	SGAPGEEQRRWEEARL	DTYGQQWK________
GGYVGDSALQLERINV	ELDDRADALQAGASQF	STRSLNYKSTSSGHRE
GDSALQLERINVYYNE	DDRADALQAGASQFET	AVQSGKKKKKQKMVRA
PQQVAQQQ________	DDLEAVAKFLDSTGSR	VNFTSELRKHPSSPAR
SDPFEVLKAAENKKKE	EHSSDPYHSGYEMPYA	HGIDPTGTYHGDSDLQ
EVLKAAENKKKEAGGG	EGTIDVTDFLSMTQQD	GGYVGDSALQLERINV
EGYIERKAFLDRVDHR	ENDNGTVRCEMPELVQ	PQQVAQQQ________
AIFGGARPREEVVQKE	DKHIEEVRKNKESKDP	SDPFEVLKAAENKKKE
NDAPHKNTQEKFSLSQ	EDGEPQQKRAHTEEPQ	EVLKAAENKKKEAGGG
GEWKALKRKKFKK___	PLSDPAPF________	EEDVTVQE________
ESQFEMDI________	LEAAKRLNAKEIVLKA	EGYIERKAFLDRVDHR
KGYWGLDASAQTTSHE	EAAKRLNAKEIVLKAQ	AIFGGARPREEVVQKE
NSSTENEA________	TTEDTEAKKRKRAERF	NDAPHKNTQEKFSLSQ
SDQTKEKE________	TEDTEAKKRKRAERFG	GEWKALKRKKFKK___
LLQDDISSSYTTTTTI	EDTEAKKRKRAERFGI	ESQFEMDI________
QDDISSSYTTTTTITA	EEAAGASPAKANGQEN	KGYWGLDASAQTTSHE
SSYTTTTTITAPPSRV	EAAGASPAKANGQENG	NSSTENEA________
SYTTTTTITAPPSRVL	GASPAKANGQENGHVK	SDQTKEKE________
YTTTTTITAPPSRVLQ	ASPAKANGQENGHVKS	LLQDDISSSYTTTTTI
PPSRVLQNGGDKLETM	KANGQENGHVKSNGDL	QDDISSSYTTTTTITA
QNGGDKLETMPLYLED	ETSKKWAAGQNKQHSI	DISSSYTTTTTITAPP
GDKLETMPLYLEDDIR	KKWAAGQNKQHSITKN	SSYTTTTTITAPPSRV
KLETMPLYLEDDIRPD	SISVQVNSIKFDSE__	SYTTTTTITAPPSRVL
AAGGRGKGAYQDRDKP	ASSQQGLAYATEAVYE	YTTTTTITAPPSRVLQ
QIRFSNISAAKAVADA	EYVGPRLSRRILQQAR	PPSRVLQNGGDKLETM
DSEPFSNPLAPDGHDV	KSNIDKKFSAHYDAVE	QNGGDKLETMPLYLED
NEDFRKLLMTPRAAPT	NDTESTAL________	GDKLETMPLYLEDDIR
MPEQTGEK________	AKVKDEPQRRSARLSA	KLETMPLYLEDDIRPD
ELKVDEVKISSAVLKA	AKSVKIKKNKDNVKFK	AAGGRGKGAYQDRDKP
AAGSTVRQRKNASCGT	PEKPVKKQKTGETSRA	QIRFSNISAAKAVADA
GDEKDVSV________	EDDEKLKKRKERFGIV	DSEPFSNPLAPDGHDV
VPRASVPDGFLSELTQ	GKDGSKVTKQEPTRRS	NEDFRKLLMTPRAAPT
EAEQGGAE________	EGAAKEEPKRRSARLS	MPEQTGEK________
IKDFLLTARRKDAKSV	DDAYLNSPWADNTALK	ELKVDEVKISSAVLKA
PEPEPVKEEKLSPEPI	WADNTALKRHFHGVKD	AAGSTVRQRKNASCGT
GTGSQAQPQPAANQAL	GSGGFHLAQQASASGS	GDEKDVSV________
LIDTHLLQARANLTQA	EDSKLKGGKAPRVATS	VPRASVPDGFLSELTQ
GVTGLSQY________	VVVELRKNKRDEHLLK	EAEQGGAE________
GEKEAKSD________	EEGGGGAP________	IKDFLLTARRKDAKSV
STSSHNLQSIFNIGSR	NAIEAVDEFAFLEGTL	PEPEPVKEEKLSPEPI
TPTLVVPHRTDGFAEA	EEEIEVDSRVADNSFD	GTGSQAQPQPAANQAL
FEPYLSPQARPNNAYT	SGGYGQDALGMDPMME	QALAAGTHSSPVPGSI
PQARPNNAYTAMSDSY	EDTVTNGS________	LIDTHLLQARANLTQA
QARPNNAYTAMSDSYL	TDEFEELEFLSTINVG	GVTGLSQY________
ADRAATGN________	SSPVNKVRRVSFADPI	GEKEAKSD________
SYFTTRTYGEPESAGP	EEEKNFKAFASLRMAR	RSSGVALSIAVGLLEC
DADAFHHQVHDDDLLS	ITVVKGIRLSENVIDR	TPTLVVPHRTDGFAEA
DKKAAGAGKVTKSAQK	PSVVDRVASMPLISST	FEPYLSPQARPNNAYT
RPREEVVQKEQE____	PPAKKLNFDQA_____	PQARPNNAYTAMSDSY
SPPQTKDQ________	KKLNFDQA________	QARPNNAYTAMSDSYL
SGAPGEEQRRWEEARL	EQRPKGQGNKVQNGSV	TLTQTADGRSSFDWLT
ELDDRADALQAGASQF	QRPKGQGNKVQNGSVH	ADRAATGN________
DDRADALQAGASQFET	RPKGQGNKVQNGSVHQ	SYFTTRTYGEPESAGP
DDLEAVAKFLDSTGSR	KGQGNKVQNGSVHQKD	DADAFHHQVHDDDLLS
EHSSDPYHSGYEMPYA	GQGNKVQNGSVHQKDG	DKKAAGAGKVTKSAQK
ENDNGTVRCEMPELVQ	GNKVQNGSVHQKDGLN	LTASQEAL________
DKHIEEVRKNKESKDP	SSEITTKDLKEKKEVV	SPPQTKDQ________
EDGEPQQKRAHTEEPQ	EITTKDLKEKKEVVEE	SGAPGEEQRRWEEARL
PLSDPAPF________	EKKEVVEEAENGRDAP	ELDDRADALQAGASQF
LEAAKRLNAKEIVLKA	KEVVEEAENGRDAPAN	DDRADALQAGASQFET
EAAKRLNAKEIVLKAQ	EVVEEAENGRDAPANG	DDLEAVAKFLDSTGSR
TTEDTEAKKRKRAERF	EEAENGRDAPANGNAE	EHSSDPYHSGYEMPYA
TEDTEAKKRKRAERFG	NGRDAPANGNAENEEN	EGTIDVTDFLSMTQQD
EDTEAKKRKRAERFGI	GRDAPANGNAENEENG	ENDNGTVRCEMPELVQ
EEAAGASPAKANGQEN	RDAPANGNAENEENGE	DKHIEEVRKNKESKDP
EAAGASPAKANGQENG	EHSPAKTSAVSNTKPG	EDGEPQQKRAHTEEPQ
GASPAKANGQENGHVK	PAKTSAVSNTKPGQPP	PLSDPAPF________
ASPAKANGQENGHVKS	AKTSAVSNTKPGQPPQ	LEAAKRLNAKEIVLKA
KANGQENGHVKSNGDL	EAATGEDASSPPPKTE	EAAKRLNAKEIVLKAQ
ETSKKWAAGQNKQHSI	AATGEDASSPPPKTEA	TTEDTEAKKRKRAERF
KKWAAGQNKQHSITKN	ERQLNENKQERDKENR	TEDTEAKKRKRAERFG
QLLSGFPRRAFSEADM	PSVTQVTRNVPPGLDE	EDTEAKKRKRAERFGI
SISVQVNSIKFDSE__	DAGAGIALNDHFVKLI	EEAAGASPAKANGQEN
EYVGPRLSRRILQQAR	HFVKLISWYDNEFGYS	EAAGASPAKANGQENG
KSNIDKKFSAHYDAVE	GDDSFNTFFSETGAGK	GASPAKANGQENGHVK
NDTESTAL________	EKGVGGNNGGNGNGGG	ASPAKANGQENGHVKS
AKVKDEPQRRSARLSA	VGGNNGGNGNGGGAFS	KANGQENGHVKSNGDL
PEKPVKKQKTGETSRA	SGTQDIQPGPLFNNNA	ETSKKWAAGQNKQHSI
EDDEKLKKRKERFGIV	AMVAATQGAAAAAGSG	KKWAAGQNKQHSITKN
GKDGSKVTKQEPTRRS	EESGITNSASSTLLSE	QLLSGFPRRAFSEADM
EGAAKEEPKRRSARLS	PAEKAPVKKKAAKKAG	SISVQVNSIKFDSE__
DDAYLNSPWADNTALK	AEKAPVKKKAAKKAGG	EYVGPRLSRRILQQAR
WADNTALKRHFHGVKD	PVKKKAAKKAGGTPRK	KSNIDKKFSAHYDAVE
GSGGFHLAQQASASGS	PAEKTPVKKKARKSAG	AKVKDEPQRRSARLSA
EDSKLKGGKAPRVATS	AEKTPVKKKARKSAGA	PEKPVKKQKTGETSRA
VVVELRKNKRDEHLLK	KTPVKKKARKSAGAAK	EDDEKLKKRKERFGIV
EEGGGGAP________	ERATEQLQRAAYYQKK	GKDGSKVTKQEPTRRS
NAIEAVDEFAFLEGTL	RATEQLQRAAYYQKKS	EGAAKEEPKRRSARLS
EEEIEVDSRVADNSFD	QQYQDATAEEEGEFEE	DDAYLNSPWADNTALK
SGGYGQDALGMDPMME	QYQDATAEEEGEFEEE	WADNTALKRHFHGVKD
FTGFGKKARTFDLEAM	LLHNNGHNGYPNGTSA	GSGGFHLAQQASASGS
EDTVTNGS________	IEADFRLNDSHKHKDK	EDSKLKGGKAPRVATS
TDEFEELEFLSTINVG	GKFERGGNSRWCDKSD	VVVELRKNKRDEHLLK
SSPVNKVRRVSFADPI	ENSSDFQSNIA_____	EEGGGGAP________
QSTRTATFQQRFDARQ	KVPDFSEYRRLEVLDS	NAIEAVDEFAFLEGTL
EEEKNFKAFASLRMAR	LEVLDSTKSSRESSEA	EEEIEVDSRVADNSFD
ITVVKGIRLSENVIDR	VENALGLDQQFAGLDL	SGGYGQDALGMDPMME
TPPAKKLNFDQA____	QFAGLDLNSSDNQSGG	FTGFGKKARTFDLEAM
PPAKKLNFDQA_____	QNDPLKDSYGMSPCNT	EDTVTNGS________
NLADSRTPAAAAAMNL	IHAREIFDSRGNPTVE	TDEFEELEFLSTINVG
EQRPKGQGNKVQNGSV	INISGNGF________	SSPVNKVRRVSFADPI
QRPKGQGNKVQNGSVH	SEDDEKLKKRKERFGI	PEAFPALA________
RPKGQGNKVQNGSVHQ	NGEPEHIERNDAPHKN	DDSLIGGNASAEGPEG
KGQGNKVQNGSVHQKD	VHSGALND________	IEQSWGSPKVTKDGVT
GQGNKVQNGSVHQKDG	FIQTQQLHAAMADTFL	QSTRTATFQQRFDARQ
GNKVQNGSVHQKDGLN	AQLDAYNARMDTS___	EEEKNFKAFASLRMAR
VFQTTDTKSKRK____	SRDSQGHGRDLSAAGI	SLNAEALQYLQGYLQA
EITTKDLKEKKEVVEE	LLAAATQSLSMPASLG	ITVVKGIRLSENVIDR
TTKDLKEKKEVVEEAE	LAAATQSLSMPASLGR	PSVVDRVASMPLISST
EKKEVVEEAENGRDAP	AAATQSLSMPASLGRM	TPPAKKLNFDQA____
KEVVEEAENGRDAPAN	VTVEGPNNNNPQTSAV	PPAKKLNFDQA_____
EVVEEAENGRDAPANG	VRTPTQTNGSNVPFKP	NLADSRTPAAAAAMNL
EEAENGRDAPANGNAE	NEGEDYAE________	EQRPKGQGNKVQNGSV
NGRDAPANGNAENEEN	KVDKVIQAQTAFSANP	QRPKGQGNKVQNGSVH
GRDAPANGNAENEENG	SLGSALRPSTSRSLYA	RPKGQGNKVQNGSVHQ
RDAPANGNAENEENGE	GDKKPDAK________	GQGNKVQNGSVHQKDG
EDTEDWRPRTGTTQSR	NLEDYKKRRGLI____	GNKVQNGSVHQKDGLN
EHSPAKTSAVSNTKPG	WSKNFKLLQSQLQVKK	VFQTTDTKSKRK____
PAKTSAVSNTKPGQPP	SKNFKLLQSQLQVKKA	SSEITTKDLKEKKEVV
AKTSAVSNTKPGQPPQ	TRTQEGSLSARWPVAG	EITTKDLKEKKEVVEE
EAATGEDASSPPPKTE	EIDDSVLGQTGPYRRP	TTKDLKEKKEVVEEAE
AATGEDASSPPPKTEA	WESPKQIKKKKKARRE	EKKEVVEEAENGRDAP
ERQLNENKQERDKENR	ITDKEKAEKLKQSLPP	KEVVEEAENGRDAPAN
DAGAGIALNDHFVKLI	ANSRPLDHAQPPSSLV	EVVEEAENGRDAPANG
HFVKLISWYDNEFGYS	GGREGLLGQRRPQDGQ	EEAENGRDAPANGNAE
GDDSFNTFFSETGAGK	ENKLLGKNGTGGLFQG	NGRDAPANGNAENEEN
GKDPLSANHSLKPLPS	FLDSGRKTRSARRRTT	GRDAPANGNAENEENG
EKGVGGNNGGNGNGGG	SGRKTRSARRRTTQII	RDAPANGNAENEENGE
VGGNNGGNGNGGGAFS	LNLRETNLDSLPLVDT	EDTEDWRPRTGTTQSR
SGTQDIQPGPLFNNNA	NLRETNLDSLPLVDTH	EHSPAKTSAVSNTKPG
AMVAATQGAAAAAGSG	ETNLDSLPLVDTHSKR	HSPAKTSAVSNTKPGQ
EESGITNSASSTLLSE	DSLPLVDTHSKRTLLI	PAKTSAVSNTKPGQPP
PAEKAPVKKKAAKKAG	HQELAKAQSGLAFQQT	AKTSAVSNTKPGQPPQ
AEKAPVKKKAAKKAGG	KAQSGLAFQQTSNTQP	EAATGEDASSPPPKTE
APVKKKAAKKAGGTPR	KLAGGQVE________	AATGEDASSPPPKTEA
PVKKKAAKKAGGTPRK	TAVFGTVSATPSSSLP	ERQLNENKQERDKENR
PAEKTPVKKKARKSAG	SSACMFSQEMYGPPAL	PSVTQVTRNVPPGLDE
AEKTPVKKKARKSAGA	DDLKKRLERIKSSRK_	DAGAGIALNDHFVKLI
KTPVKKKARKSAGAAK	QESFAEHRSGLVPQQI	HFVKLISWYDNEFGYS
ERATEQLQRAAYYQKK	SFAEHRSGLVPQQIKV	EKGVGGNNGGNGNGGG
RATEQLQRAAYYQKKS	RLLQDSVDFSLADAIN	VGGNNGGNGNGGGAFS
QQYQDATAEEEGEFEE	FVRSSKQHYNCEHSKI	SGTQDIQPGPLFNNNA
QYQDATAEEEGEFEEE	IMGLSSQNGQLRGPVK	AMVAATQGAAAAAGSG
LLHNNGHNGYPNGTSA	MGLSSQNGQLRGPVKP	EESGITNSASSTLLSE
IEADFRLNDSHKHKDK	TISEVALQSGRGTVSL	PAEKAPVKKKAAKKAG
GKFERGGNSRWCDKSD	YDFSTDYV________	AEKAPVKKKAAKKAGG
ENSSDFQSNIA_____	TKKLEDVKNSPTFKSF	APVKKKAAKKAGGTPR
KVPDFSEYRRLEVLDS	IDQEEGIS________	PVKKKAAKKAGGTPRK
LEVLDSTKSSRESSEA	SKLKKERPDF______	PAEKTPVKKKARKSAG
VENALGLDQQFAGLDL	DWNGTRPSLKAPPARP	AEKTPVKKKARKSAGA
QFAGLDLNSSDNQSGG	MSKEEILSVAKKNKKE	KTPVKKKARKSAGAAK
QNDPLKDSYGMSPCNT	SGSSKGGPLQALTRES	ERATEQLQRAAYYQKK
IHAREIFDSRGNPTVE	SSKGGPLQALTRESTR	RATEQLQRAAYYQKKS
SEDDEKLKKRKERFGI	SKGGPLQALTRESTRG	QQYQDATAEEEGEFEE
NGEPEHIERNDAPHKN	GGPLQALTRESTRGSR	QYQDATAEEEGEFEEE
VHSGALND________	ALTRESTRGSRRTPRK	LLHNNGHNGYPNGTSA
FIQTQQLHAAMADTFL	GGMGGGMF________	IEADFRLNDSHKHKDK
AQLDAYNARMDTS___	ESVDNEGE________	GKFERGGNSRWCDKSD
YNARMDTS________	NLADSRTPAAAAAMNL	ENSSDFQSNIA_____
SRDSQGHGRDLSAAGI	KTAVAPIERVKLLLQV	KVPDFSEYRRLEVLDS
LAAATQSLSMPASLGR	AKDVTLLKETERASPI	LEVLDSTKSSRESSEA
AAATQSLSMPASLGRM	LSEAEAQALLSGDTQT	VENALGLDQQFAGLDL
VTVEGPNNNNPQTSAV	EAEAQALLSGDTQTDA	QFAGLDLNSSDNQSGG
NNNNPQTSAVRTPTQT	VEGSLIVEKIMQSSSE	QNDPLKDSYGMSPCNT
VRTPTQTNGSNVPFKP	QREDGHRPNSHRTLPE	IHAREIFDSRGNPTVE
NEGEDYAE________	LNQVARQQSHFAMMHG	INISGNGF________
KVDKVIQAQTAFSANP	QVARQQSHFAMMHGGT	SEDDEKLKKRKERFGI
SLGSALRPSTSRSLYA	QSHFAMMHGGTGFAGI	NGEPEHIERNDAPHKN
GDKKPDAK________	TKAKSKKN________	VHSGALND________
NLEDYKKRRGLI____	IEQEKRSEIS______	FIQTQQLHAAMADTFL
KTEGWSKNFKLLQSQL	QEKRSEIS________	AQLDAYNARMDTS___
WSKNFKLLQSQLQVKK	IQALTLAPAIRDKLDI	SRDSQGHGRDLSAAGI
VKKAALTQAKSQRTKQ	TETSYVTGSTMPPTTV	LLAAATQSLSMPASLG
ALTRESTRGSRRTPRK	KIDDIRKPGESEE___	LAAATQSLSMPASLGR
TRTQEGSLSARWPVAG	RKPGESEE________	AAATQSLSMPASLGRM
EIDDSVLGQTGPYRRP	PQPQSLLQAQISAASI	NNNNPQTSAVRTPTQT
WESPKQIKKKKKARRE	AEVVQGQSRTPRISPP	VRTPTQTNGSNVPFKP
ITDKEKAEKLKQSLPP	EIPKEEKDPGMGAMGG	NEGEDYAE________
GGREGLLGQRRPQDGQ	KKDSSQLGTDATKEKP	KVDKVIQAQTAFSANP
ENKLLGKNGTGGLFQG	GISETRIEKRIVITGD	SLGSALRPSTSRSLYA
FLDSGRKTRSARRRTT	SSSLGGLSHSEEIPNT	GDKKPDAK________
SGRKTRSARRRTTQII	GVDPNSRNSSRVLRPP	NLEDYKKRRGLI____
LNLRETNLDSLPLVDT	DPNSRNSSRVLRPPGG	KTEGWSKNFKLLQSQL
NLRETNLDSLPLVDTH	ITPPVVLRLKCGSGPV	TEGWSKNFKLLQSQLQ
ETNLDSLPLVDTHSKR	EVLDNLLAFVCDIRPE	SKNFKLLQSQLQVKKA
DSLPLVDTHSKRTLLI	AAGAGKVTKSAQKAQK	VKKAALTQAKSQRTKQ
HQELAKAQSGLAFQQT	KAVDKKAAGAGKVTKS	ALTRESTRGSRRTPRK
KAQSGLAFQQTSNTQP	TDLVAKLRAFHNEAQV	TRTQEGSLSARWPVAG
TAVFGTVSATPSSSLP	LEDEVRNLRKINRDLF	EIDDSVLGQTGPYRRP
SSACMFSQEMYGPPAL	SEDLVIRLRRPPLRYP	WESPKQIKKKKKARRE
DDLKKRLERIKSSRK_	KEVVIVSATRTPIGSF	ITDKEKAEKLKQSLPP
QESFAEHRSGLVPQQI	IVSATRTPIGSFLGSL	ANSRPLDHAQPPSSLV
SFAEHRSGLVPQQIKV	SATRTPIGSFLGSLSL	GGREGLLGQRRPQDGQ
RLLQDSVDFSLADAIN	SSGITGIPETSISGPS	ENKLLGKNGTGGLFQG
FVRSSKQHYNCEHSKI	ATETVRSILKIDDVVN	FLDSGRKTRSARRRTT
IMGLSSQNGQLRGPVK	RTYSLGSALRPSTSRS	SGRKTRSARRRTTQII
MGLSSQNGQLRGPVKP	LDAAGVASLLTTAEVV	NLRETNLDSLPLVDTH
TISEVALQSGRGTVSL	DAAGVASLLTTAEVVV	ETNLDSLPLVDTHSKR
YDFSTDYV________	LGNEERKQKFLRLMGA	DSLPLVDTHSKRTLLI
TKKLEDVKNSPTFKSF	GNEERKQKFLRLMGAG	TVQHQELAKAQSGLAF
IDQEEGIS________	PGGVYATRSSAVRLRS	HQELAKAQSGLAFQQT
SKLKKERPDF______	ASSEELARQRGVLERT	KAQSGLAFQQTSNTQP
TAGAVPVRNEKGEISM	YPDEYHGEYQDDYPRD	KLAGGQVE________
ATLSVHQLVENTDETY	PPPPPSRK________	TAVFGTVSATPSSSLP
MSKEEILSVAKKNKKE	APDDVDFF________	SSACMFSQEMYGPPAL
SGSSKGGPLQALTRES	NA	DDLKKRLERIKSSRK_
SSKGGPLQALTRESTR	NA	QESFAEHRSGLVPQQI
GGPLQALTRESTRGSR	NA	SFAEHRSGLVPQQIKV
RESTRGSRRTPRKRVE	NA	LNSEEESDPPTYKDAF
ESVDNEGE________	NA	IMGLSSQNGQLRGPVK
AKDVTLLKETERASPI	NA	MGLSSQNGQLRGPVKP
TTISSQKI________	NA	TISEVALQSGRGTVSL
TTVVANLGGHPQPTQV	NA	YDFSTDYV________
LSEAEAQALLSGDTQT	NA	TKKLEDVKNSPTFKSF
EAEAQALLSGDTQTDA	NA	IDQEEGIS________
VEGSLIVEKIMQSSSE	NA	SKLKKERPDF______
SLIVEKIMQSSSEVGY	NA	TAGAVPVRNEKGEISM
QREDGHRPNSHRTLPE	NA	DWNGTRPSLKAPPARP
LNQVARQQSHFAMMHG	NA	MSKEEILSVAKKNKKE
QVARQQSHFAMMHGGT	NA	SGSSKGGPLQALTRES
QSHFAMMHGGTGFAGI	NA	SSKGGPLQALTRESTR
TKAKSKKN________	NA	GGPLQALTRESTRGSR
IEQEKRSEIS______	NA	RESTRGSRRTPRKRVE
QEKRSEIS________	NA	LEELVVQPLLVSVSAL
IQALTLAPAIRDKLDI	NA	ESVDNEGE________
TETSYVTGSTMPPTTV	NA	EIRTLAVERLLEPLVT
KIDDIRKPGESEE___	NA	PYTFQPNK________
RKPGESEE________	NA	AKDVTLLKETERASPI
PQPQSLLQAQISAASI	NA	PEKTQESL________
AEVVQGQSRTPRISPP	NA	TGDPYKVQQAKEMVLE
VAESEFTH________	NA	TTVVANLGGHPQPTQV
GISETRIEKRIVITGD	NA	LSEAEAQALLSGDTQT
SSSLGGLSHSEEIPNT	NA	EAEAQALLSGDTQTDA
GVDPNSRNSSRVLRPP	NA	VEGSLIVEKIMQSSSE
DPNSRNSSRVLRPPGG	NA	SLIVEKIMQSSSEVGY
ITPPVVLRLKCGSGPV	NA	QREDGHRPNSHRTLPE
EVLDNLLAFVCDIRPE	NA	LNQVARQQSHFAMMHG
AAGAGKVTKSAQKAQK	NA	QVARQQSHFAMMHGGT
KAVDKKAAGAGKVTKS	NA	QSHFAMMHGGTGFAGI
QVQVQIQGQAPQSAAP	NA	TKAKSKKN________
TDLVAKLRAFHNEAQV	NA	IEQEKRSEIS______
LEDEVRNLRKINRDLF	NA	QEKRSEIS________
SEDLVIRLRRPPLRYP	NA	TETSYVTGSTMPPTTV
KEVVIVSATRTPIGSF	NA	KIDDIRKPGESEE___
IVSATRTPIGSFLGSL	NA	RKPGESEE________
SATRTPIGSFLGSLSL	NA	PQPQSLLQAQISAASI
SSGITGIPETSISGPS	NA	AEVVQGQSRTPRISPP
RTYSLGSALRPSTSRS	NA	VAESEFTH________
DAAGVASLLTTAEVVV	NA	GISETRIEKRIVITGD
GNEERKQKFLRLMGAG	NA	SSSLGGLSHSEEIPNT
PGGVYATRSSAVRLRS	NA	GVDPNSRNSSRVLRPP
EDEKRYNERISGLGLT	NA	DPNSRNSSRVLRPPGG
ASSEELARQRGVLERT	NA	ITPPVVLRLKCGSGPV
YPDEYHGEYQDDYPRD	NA	EVLDNLLAFVCDIRPE
PPPPPSRK________	NA	AAGAGKVTKSAQKAQK
APDDVDFF________	NA	KAVDKKAAGAGKVTKS
NA	NA	AVDKKAAGAGKVTKSA
NA	NA	TDLVAKLRAFHNEAQV
NA	NA	LEDEVRNLRKINRDLF
NA	NA	SEDLVIRLRRPPLRYP
NA	NA	KEVVIVSATRTPIGSF
NA	NA	IVSATRTPIGSFLGSL
NA	NA	SATRTPIGSFLGSLSL
NA	NA	SSGITGIPETSISGPS
NA	NA	ATETVRSILKIDDVVN
NA	NA	RTYSLGSALRPSTSRS
NA	NA	LGNEERKQKFLRLMGA
NA	NA	GNEERKQKFLRLMGAG
NA	NA	PGGVYATRSSAVRLRS
NA	NA	ASSEELARQRGVLERT
NA	NA	YPDEYHGEYQDDYPRD
NA	NA	PPPPPSRK________
NA	NA	APDDVDFF________

## Sheet: MPro_30min
Rep_1	Rep_2	Rep_3
VASPAKLQAAATLTEV	KRRALAAPAAEEKEEA	VASPAKLQAAATLTEV
KRRALAAPAAEEKEEA	AAAQTNSNAAGKQLRK	KRRALAAPAAEEKEEA
AAAQTNSNAAGKQLRK	KSLKFATEAAITILRI	AAAQTNSNAAGKQLRK
KSLKFATEAAITILRI	KAEVARAQAALAVNIS	KSLKFATEAAITILRI
KAEVARAQAALAVNIS	RAQSREQLAALKKHHE	KAEVARAQAALAVNIS
RAQSREQLAALKKHHE	SPSPSQLQAAQIQVQH	RAQSREQLAALKKHHE
SPSPSQLQAAQIQVQH	AVHPVRDYAAQTSPSP	SPSPSQLQAAQIQVQH
AVHPVRDYAAQTSPSP	LEEHAKLQAAVDGPMD	AVHPVRDYAAQTSPSP
LEEHAKLQAAVDGPMD	RRGHRLSPADDELYQR	LEEHAKLQAAVDGPMD
RRGHRLSPADDELYQR	LGSSNWEAADLGNEER	RRGHRLSPADDELYQR
LGSSNWEAADLGNEER	RDFIATLEAEAFDDVV	LGSSNWEAADLGNEER
RDFIATLEAEAFDDVV	ESAEELQAAEHPDEVE	RDFIATLEAEAFDDVV
ESAEELQAAEHPDEVE	QETLVKIQAEHSESGQ	ESAEELQAAEHPDEVE
QETLVKIQAEHSESGQ	MESHRNANAEPAVQRT	QETLVKIQAEHSESGQ
MESHRNANAEPAVQRT	YSTLHTQSAEPPPPPE	MESHRNANAEPAVQRT
YSTLHTQSAEPPPPPE	KKLCFKENAEQGEVDM	YSTLHTQSAEPPPPPE
KKLCFKENAEQGEVDM	APKKPLTRAEVGEKTE	KKLCFKENAEQGEVDM
APKKPLTRAEVGEKTE	SLRTVSLGAGAKDELH	APKKPLTRAEVGEKTE
SLRTVSLGAGAKDELH	LLKHYRGPAGDATVAS	SLRTVSLGAGAKDELH
LLKHYRGPAGDATVAS	LLDGKNVNAGGHKLGL	LLKHYRGPAGDATVAS
LLDGKNVNAGGHKLGL	LVDGKSINAGGHKVGL	LLDGKNVNAGGHKLGL
LVDGKSINAGGHKVGL	AVDKKAAGAGKVTKSA	LVDGKSINAGGHKVGL
EHNQSYSQAGITETEW	SYFTSGLQAGLKQSHL	EHNQSYSQAGITETEW
SYFTSGLQAGLKQSHL	SVSSQYNMAGVRTEDS	SYFTSGLQAGLKQSHL
SVSSQYNMAGVRTEDS	DEAVAVLQAHHAKKEA	SVSSQYNMAGVRTEDS
DEAVAVLQAHHAKKEA	TSSKRALGAHLEAEPK	DEAVAVLQAHHAKKEA
TSSKRALGAHLEAEPK	ISSNPELAAIFESIQK	TSSKRALGAHLEAEPK
AYTIQGQYAIPQPDLT	NLASARTPAIPTAVNL	ISSNPELAAIFESIQK
NLASARTPAIPTAVNL	APHLTRAYAKDVKFGA	AYTIQGQYAIPQPDLT
APHLTRAYAKDVKFGA	KDKYKNIGAKLVQDVA	NLASARTPAIPTAVNL
KDKYKNIGAKLVQDVA	QRRSARLSAKPAPPKP	APHLTRAYAKDVKFGA
QRRSARLSAKPAPPKP	SSIQSIVPALEIANAH	KDKYKNIGAKLVQDVA
AKAVKPKAAKPKTAKP	AQSREQLAALKKHHEE	QRRSARLSAKPAPPKP
SSIQSIVPALEIANAH	QKADVTLSALNDSDAN	AKAVKPKAAKPKTAKP
AQSREQLAALKKHHEE	EKVAEKLEALSVKEET	SSIQSIVPALEIANAH
RDEVSKNQALKLQLDN	SSGVQPTLAMPNIAVG	AQSREQLAALKKHHEE
QKADVTLSALNDSDAN	MDHHFRKPANDITSQL	RDEVSKNQALKLQLDN
EKVAEKLEALSVKEET	GARGGPAKANSNPFEV	QKADVTLSALNDSDAN
SSGVQPTLAMPNIAVG	VFRLAKENAPAIIFID	EKVAEKLEALSVKEET
MDHHFRKPANDITSQL	PYEYPYTLAPATSILE	SSGVQPTLAMPNIAVG
GARGGPAKANSNPFEV	GFGLERMAAPIDRVGQ	MDHHFRKPANDITSQL
VFRLAKENAPAIIFID	SEAAPEAGAPTSASGL	GARGGPAKANSNPFEV
PYEYPYTLAPATSILE	KPGMVVTFAPVNVTTE	VFRLAKENAPAIIFID
GFGLERMAAPIDRVGQ	TTYTSQNNAQGPLYEQ	PYEYPYTLAPATSILE
SEAAPEAGAPTSASGL	QEMIARMQAQMQMQMQ	GFGLERMAAPIDRVGQ
KPGMVVTFAPVNVTTE	PNSAIFGGARPREEVV	SEAAPEAGAPTSASGL
TTYTSQNNAQGPLYEQ	SLLGFSVNASSERLNM	KPGMVVTFAPVNVTTE
QEMIARMQAQMQMQMQ	ELQMTRQMASSGASGG	TTYTSQNNAQGPLYEQ
PNSAIFGGARPREEVV	PSTSRSLYASSPGGVY	QEMIARMQAQMQMQMQ
SLLGFSVNASSERLNM	SEYQQYQDATAEEEED	PNSAIFGGARPREEVV
PSTSRSLYASSPGGVY	SEYQQYQDATAEEEGE	SLLGFSVNASSERLNM
SEYQQYQDATAEEEED	VSVSALTLATETVRSI	ELQMTRQMASSGASGG
SEYQQYQDATAEEEGE	LPSASTSKATISDEEI	PSTSRSLYASSPGGVY
VSVSALTLATETVRSI	KASKTAENATSGETLE	SEYQQYQDATAEEEED
LPSASTSKATISDEEI	GAGKHVPRAVFVDLEP	VSVSALTLATETVRSI
KASKTAENATSGETLE	VKEVCRDFAVLEDHTL	LPSASTSKATISDEEI
GAGKHVPRAVFVDLEP	HRNANAEPAVQRTLLE	KASKTAENATSGETLE
VKEVCRDFAVLEDHTL	ELGEYGLQAYTEVKTV	GAGKHVPRAVFVDLEP
HRNANAEPAVQRTLLE	PEIDITCWDADPVPEE	VKEVCRDFAVLEDHTL
ELGEYGLQAYTEVKTV	AKDVKFGADARALMLQ	HRNANAEPAVQRTLLE
PEIDITCWDADPVPEE	KHYRGPAGDATVASEK	ELGEYGLQAYTEVKTV
AKDVKFGADARALMLQ	LTFGSVRADDEVDVDG	PEIDITCWDADPVPEE
KHYRGPAGDATVASEK	WHSSRPVRDDSVVEKS	AKDVKFGADARALMLQ
LTFGSVRADDEVDVDG	RGRSSFYPDGGDQETA	KHYRGPAGDATVASEK
WHSSRPVRDDSVVEKS	KKAGSGKNDHAEKVAE	LTFGSVRADDEVDVDG
RGRSSFYPDGGDQETA	HHFRKPANDITSQLEI	WHSSRPVRDDSVVEKS
HHFRKPANDITSQLEI	KAEGDAKGDKAKVKDE	RGRSSFYPDGGDQETA
KAEGDAKGDKAKVKDE	VAKSIDLKDKYKNIGA	KKAGSGKNDHAEKVAE
VAKSIDLKDKYKNIGA	GSSNWEAADLGNEERK	NYDGDVQSDILAQGFG
GSSNWEAADLGNEERK	GQYAIPQPDLTKLHQL	HHFRKPANDITSQLEI
GQYAIPQPDLTKLHQL	IRRVGRRPDQQLQGEG	KAEGDAKGDKAKVKDE
IRRVGRRPDQQLQGEG	CVPVANKRDTRSIEEA	VAKSIDLKDKYKNIGA
DKSSASAPDVDDPEAF	DKSSASAPDVDDPEAF	GSSNWEAADLGNEERK
HLTRAYAKDVKFGADA	HLTRAYAKDVKFGADA	GQYAIPQPDLTKLHQL
SLGSLQTPEAVTTRKG	SLGSLQTPEAVTTRKG	IRRVGRRPDQQLQGEG
PRFRFGPPEDMPQTSS	TEDSIRDYEDGMEVDT	CVPVANKRDTRSIEEA
QDVANNTNEEAGDGTT	PRFRFGPPEDMPQTSS	DKSSASAPDVDDPEAF
QQYQDATAEEEEDFGE	QDVANNTNEEAGDGTT	HLTRAYAKDVKFGADA
GSGRGPPQEEEEEEDE	QQYQDATAEEEEDFGE	SLGSLQTPEAVTTRKG
TAPVPTVGEGYGYGHE	TAPVPTVGEGYGYGHE	TEDSIRDYEDGMEVDT
KDSRLKTLEIALEQKK	KDSRLKTLEIALEQKK	PRFRFGPPEDMPQTSS
RKTPQGPPEIYSDTQF	RKTPQGPPEIYSDTQF	QDVANNTNEEAGDGTT
AAKLERLREKDKHIEE	AAKLERLREKDKHIEE	QQYQDATAEEEEDFGE
ACKFAELKEKIDRRSG	ACKFAELKEKIDRRSG	GSGRGPPQEEEEEEDE
QELRPTLNELGISTPE	QELRPTLNELGISTPE	TAPVPTVGEGYGYGHE
EGKTKEVYELLDSPGK	EGKTKEVYELLDSPGK	KDSRLKTLEIALEQKK
ASVVKVLTELLEQERK	ASVVKVLTELLEQERK	RKTPQGPPEIYSDTQF
ESHRNANAEPAVQRTL	ESHRNANAEPAVQRTL	AAKLERLREKDKHIEE
TYRQLFHPEQLITGKE	TYRQLFHPEQLITGKE	ACKFAELKEKIDRRSG
LDILTRLPESVERLTG	LDILTRLPESVERLTG	ASVVKVLTELLEQERK
RGQEPQMKETIMNQEK	RGQEPQMKETIMNQEK	ESHRNANAEPAVQRTL
RTLLIKTVETRDGQVI	RTLLIKTVETRDGQVI	TYRQLFHPEQLITGKE
KLYEGKTKEVYELLDS	IATLEAEAFDDVVGET	LDILTRLPESVERLTG
RGSGSRGRFDDRGRSD	GGSNFSLGFDEPTEQP	RGQEPQMKETIMNQEK
IATLEAEAFDDVVGET	SSSSYRRMFGGPGTAS	RTLLIKTVETRDGQVI
GGSNFSLGFDEPTEQP	AYQKKKLCFKENAEQG	IATLEAEAFDDVVGET
GIGGMQQHFFDDEDRT	QDSYLGDEFKSQIDVA	GGSNFSLGFDEPTEQP
SSSSYRRMFGGPGTAS	LKADKDYHFKVDNDEN	GIGGMQQHFFDDEDRT
AMGFQRRFFHQDQSPV	RKVVDYSQFQESDDAD	SSSSYRRMFGGPGTAS
AYQKKKLCFKENAEQG	GDHKSTSHFRTGEEDK	AMGFQRRFFHQDQSPV
QDSYLGDEFKSQIDVA	KSKENPRNFSDNQLQE	AYQKKKLCFKENAEQG
LKADKDYHFKVDNDEN	RPPGGGSNFSLGFDEP	QDSYLGDEFKSQIDVA
TSKGQKCEFQDAYVLL	WEQGFSQSFTQEQVAD	LKADKDYHFKVDNDEN
RKVVDYSQFQESDDAD	PGLPTRPCFYDIDLDP	TSKGQKCEFQDAYVLL
KRVETSEHFRIDGPVI	KMAAAAVNGAAGFSSS	RKVVDYSQFQESDDAD
GDHKSTSHFRTGEEDK	GTMKMLVSGAGDIKLT	KRVETSEHFRIDGPVI
KSKENPRNFSDNQLQE	KQKFLRLMGAGKKEHT	GDHKSTSHFRTGEEDK
NPLPGGRNFSGTASTS	EGNNPAENGDAKTDQA	KSKENPRNFSDNQLQE
RPPGGGSNFSLGFDEP	AILAAQRRGEDVETSK	NPLPGGRNFSGTASTS
WEQGFSQSFTQEQVAD	NVPWAFMQGEIATILA	RPPGGGSNFSLGFDEP
PGLPTRPCFYDIDLDP	EEEEGGLRGEKRKRDA	PGLPTRPCFYDIDLDP
KMAAAAVNGAAGFSSS	LGMPAFKPGEKVLLSD	KMAAAAVNGAAGFSSS
GTMKMLVSGAGDIKLT	SYFTTRTYGEPESAGP	KQKFLRLMGAGKKEHT
KQKFLRLMGAGKKEHT	KEDLPAENGETKTEES	EGNNPAENGDAKTDQA
EGNNPAENGDAKTDQA	GGGSNFSLGFDEPTEQ	AILAAQRRGEDVETSK
EGDGEEEDGDEDEEAE	ANPNSAIFGGARPREE	NVPWAFMQGEIATILA
AILAAQRRGEDVETSK	TVGEGYGYGHESELSQ	EEEEGGLRGEKRKRDA
NVPWAFMQGEIATILA	PTSASGLNGHPTLSGG	LGMPAFKPGEKVLLSD
EEEEGGLRGEKRKRDA	KLKQSLPPGLAVKELK	SYFTTRTYGEPESAGP
LGMPAFKPGEKVLLSD	VPGPLPDFGLEESGHS	KEDLPAENGETKTEES
SYFTTRTYGEPESAGP	QAQLALKPGLIGNANM	GGGSNFSLGFDEPTEQ
GGGSNFSLGFDEPTEQ	KDTAPVLEGLKEEEIT	ANPNSAIFGGARPREE
ANPNSAIFGGARPREE	YDQRQKSMGLPTSDEQ	QSHFAMMHGGTGFAGI
QSHFAMMHGGTGFAGI	AVNISAARGLQDVLRT	TVGEGYGYGHESELSQ
TVGEGYGYGHESELSQ	SNYGPMKSGNFGGSRN	PTSASGLNGHPTLSGG
KLKQSLPPGLAVKELK	VQDSYEAYGQDDWNGT	KLKQSLPPGLAVKELK
VPGPLPDFGLEESGHS	EVVRHKNRGRDEVSKN	VPGPLPDFGLEESGHS
QAQLALKPGLIGNANM	PTNGMAKNGSEADIDE	QAQLALKPGLIGNANM
KDTAPVLEGLKEEEIT	ALSSDFTCGSPTAAGK	KDTAPVLEGLKEEEIT
YDQRQKSMGLPTSDEQ	KGTENGVNGTLTSNVA	YDQRQKSMGLPTSDEQ
AVNISAARGLQDVLRT	KNVIGLQMGTNRGASQ	AVNISAARGLQDVLRT
SNYGPMKSGNFGGSRN	DMRQTVAVGVIKAVDK	SNYGPMKSGNFGGSRN
VQDSYEAYGQDDWNGT	AMKKVGRKGVITVKDG	VQDSYEAYGQDDWNGT
EVVRHKNRGRDEVSKN	VRLRSSVPGVRLLQDS	EVVRHKNRGRDEVSKN
PTNGMAKNGSEADIDE	AGGTRGSNHARIDAAE	PTNGMAKNGSEADIDE
ALSSDFTCGSPTAAGK	VISAEKAYHEQLSVAE	ALSSDFTCGSPTAAGK
ENLKSKVGGTKPAGGD	VGEGYGYGHESELSQA	ENLKSKVGGTKPAGGD
KGTENGVNGTLTSNVA	GIDPTGTYHGDSDLQL	KGTENGVNGTLTSNVA
QTTISLQMGTNKGASQ	FWEVISDEHGIDPTGT	QTTISLQMGTNKGASQ
KNVIGLQMGTNRGASQ	CWELYCLEHGIQPDGQ	KNVIGLQMGTNRGASQ
DARALMLQGVDLLADA	EQLAALKKHHEEEIVH	DMRQTVAVGVIKAVDK
DMRQTVAVGVIKAVDK	ERLREKDKHIEEVRKN	AMKKVGRKGVITVKDG
AMKKVGRKGVITVKDG	DAEEAWRSHINQLMCD	VRLRSSVPGVRLLQDS
VRLRSSVPGVRLLQDS	MTAYGTRRHLYDPKMQ	AGGTRGSNHARIDAAE
AGGTRGSNHARIDAAE	SQGLSQLYHNQSQGLL	VISAEKAYHEQLSVAE
VISAEKAYHEQLSVAE	GPLPLSSQHRGDADQA	VGEGYGYGHESELSQA
VGEGYGYGHESELSQA	RLTSFIGAIAIGDLVK	GIDPTGTYHGDSDLQL
GIDPTGTYHGDSDLQL	STEMRRRRIEVNVELR	FWEVISDEHGIDPTGT
FWEVISDEHGIDPTGT	KKIEELMKIGSDVELL	CWELYCLEHGIQPDGQ
CWELYCLEHGIQPDGQ	RMGQTMERIGSGVERM	EQLAALKKHHEEEIVH
EQLAALKKHHEEEIVH	THSKRTLLIKTVETRD	ERLREKDKHIEEVRKN
ERLREKDKHIEEVRKN	YTIQGQYAIPQPDLTK	DAEEAWRSHINQLMCD
DAEEAWRSHINQLMCD	KHASPILPITEFSDIP	MTAYGTRRHLYDPKMQ
MTAYGTRRHLYDPKMQ	GVIKAVDKKAAGAGKV	SQGLSQLYHNQSQGLL
GPLPLSSQHRGDADQA	KTTEAKMMKAGGTEIG	GPLPLSSQHRGDADQA
STEMRRRRIEVNVELR	AGARGGPAKANSNPFE	RLTSFIGAIAIGDLVK
KKIEELMKIGSDVELL	DFLLTARRKDAKSVKI	STEMRRRRIEVNVELR
RMGQTMERIGSGVERM	SWGSPKVTKDGVTVAK	KKIEELMKIGSDVELL
THSKRTLLIKTVETRD	LYRGDVVPKDVNAAIA	RMGQTMERIGSGVERM
YTIQGQYAIPQPDLTK	REDMAALEKDYEEVGA	THSKRTLLIKTVETRD
KHASPILPITEFSDIP	REDMAALEKDYEEVGV	YTIQGQYAIPQPDLTK
KLPTISQRIVSAQSLA	FGCELKADKDYHFKVD	KHASPILPITEFSDIP
GVIKAVDKKAAGAGKV	AKLLAKRMKEAKEKRQ	GVIKAVDKKAAGAGKV
KTTEAKMMKAGGTEIG	SKLDWESFKEEEGIGE	KTTEAKMMKAGGTEIG
AGARGGPAKANSNPFE	SKKAEQKKKEKIIEDK	AGARGGPAKANSNPFE
DFLLTARRKDAKSVKI	YQKKKLCFKENAEQGE	DFLLTARRKDAKSVKI
SWGSPKVTKDGVTVAK	LTHKMEANKENREAQM	SWGSPKVTKDGVTVAK
LYRGDVVPKDVNAAIA	DDEKLKKRKERFGIVT	LYRGDVVPKDVNAAIA
REDMAALEKDYEEVGV	TRGQEPQMKETIMNQE	REDMAALEKDYEEVGA
FGCELKADKDYHFKVD	DAMKKVGRKGVITVKD	REDMAALEKDYEEVGV
AKLLAKRMKEAKEKRQ	STRSFILDKIIEEDDA	FGCELKADKDYHFKVD
SKLDWESFKEEEGIGE	VGVIKAVDKKAAGAGK	AKLLAKRMKEAKEKRQ
SKKAEQKKKEKIIEDK	GSKKAEQKKKEKIIED	SKLDWESFKEEEGIGE
YQKKKLCFKENAEQGE	KDMPPRFSKKGQLNAD	SKKAEQKKKEKIIEDK
LTHKMEANKENREAQM	ARLFGIRAKRAKEAAE	YQKKKLCFKENAEQGE
DDEKLKKRKERFGIVT	FSSSSSTRKRGPSEET	LTHKMEANKENREAQM
TRGQEPQMKETIMNQE	LEDGPKFLKSGDAAIV	DDEKLKKRKERFGIVT
DAMKKVGRKGVITVKD	KQKMSTLEKSKLDWES	TRGQEPQMKETIMNQE
STRSFILDKIIEEDDA	PRTVSGRYKSTTSVSE	DAMKKVGRKGVITVKD
VGVIKAVDKKAAGAGK	KKASSKKQKTENVFVD	STRSFILDKIIEEDDA
GSKKAEQKKKEKIIED	IDLAVLLGKTPSTMEN	VGVIKAVDKKAAGAGK
KDMPPRFSKKGQLNAD	HSKRTLLIKTVETRDG	GSKKAEQKKKEKIIED
DKYKNIGAKLVQDVAN	MSRPVRNRKVVDYSQF	KDMPPRFSKKGQLNAD
ARLFGIRAKRAKEAAE	AVAPSAVNLADPRTPT	DKYKNIGAKLVQDVAN
RGSRRTPRKRVETSEH	QGQHTISPLDLAKLNQ	ARLFGIRAKRAKEAAE
LEDGPKFLKSGDAAIV	KNQALKLQLDNQYAVL	FSSSSSTRKRGPSEET
KQKMSTLEKSKLDWES	HAEKVAEKLEALSVKE	RGSRRTPRKRVETSEH
PRTVSGRYKSTTSVSE	LANEKNLKLEGTEDLS	LEDGPKFLKSGDAAIV
KKASSKKQKTENVFVD	MRKVPRVSLERLDLDL	KQKMSTLEKSKLDWES
IGKKLYEGKTKEVYEL	QESAEPSQLEVPATEE	PRTVSGRYKSTTSVSE
YETIGKTTKTPEDGDY	GSELIQKYLGDGPKLV	KKASSKKQKTENVFVD
IDLAVLLGKTPSTMEN	SKAIGSSPLGSGEGLL	IGKKLYEGKTKEVYEL
HSKRTLLIKTVETRDG	RRKHQITYLIHQAKER	IDLAVLLGKTPSTMEN
MSRPVRNRKVVDYSQF	DTHSKRTLLIKTVETR	HSKRTLLIKTVETRDG
NFGRSGRTKYTHLVDQ	DDDAGSAPLKSSGQHQ	MSRPVRNRKVVDYSQF
AVAPSAVNLADPRTPT	QTVTQLQQLLQAVNQQ	NFGRSGRTKYTHLVDQ
LVSVSALTLATETVRS	RSSVPGVRLLQDSVDF	AVAPSAVNLADPRTPT
QGQHTISPLDLAKLNQ	SKKTVELPLNKEEIER	LVSVSALTLATETVRS
KNQALKLQLDNQYAVL	EHRYVELFLNSTAGAS	QGQHTISPLDLAKLNQ
HAEKVAEKLEALSVKE	VMFTEDLKLPASFDAR	KNQALKLQLDNQYAVL
LANEKNLKLEGTEDLS	GADARALMLQGVDLLA	HAEKVAEKLEALSVKE
QESAEPSQLEVPATEE	PHQVEQTELQQEQLQT	LANEKNLKLEGTEDLS
GSELIQKYLGDGPKLV	QMAAKLERLREKDKHI	MRKVPRVSLERLDLDL
RRKHQITYLIHQAKER	KELAEQLGLSTGEKEK	QESAEPSQLEVPATEE
DTHSKRTLLIKTVETR	PLLVSVSALTLATETV	GSELIQKYLGDGPKLV
DDDAGSAPLKSSGQHQ	VYRPPGARLTTTRKTP	SKAIGSSPLGSGEGLL
QTVTQLQQLLQAVNQQ	KGDLPREPLVATNLPG	RRKHQITYLIHQAKER
RSSVPGVRLLQDSVDF	RCSRYLYTLVITDKEK	DTHSKRTLLIKTVETR
LDAAGVASLLTTAEVV	HIDVITAEMAKDFVED	RAQRPRLQLKPRTVAT
SKKTVELPLNKEEIER	GPPLRGSNMDFREPTE	DDDAGSAPLKSSGQHQ
EHRYVELFLNSTAGAS	VSSSSYRRMFGGPGTA	QTVTQLQQLLQAVNQQ
AQPHPSAGLNVDFESV	NASSERLNMGEIETLD	LDAAGVASLLTTAEVV
VMFTEDLKLPASFDAR	RVGQTIERMGSGVERM	SKKTVELPLNKEEIER
GADARALMLQGVDLLA	GKNVIGLQMGTNRGAS	EHRYVELFLNSTAGAS
PHQVEQTELQQEQLQT	GTRGQEPQMKETIMNQ	AQPHPSAGLNVDFESV
QMAAKLERLREKDKHI	EPQMKETIMNQEKLAK	VMFTEDLKLPASFDAR
AGRNSKQQLSAEELDA	ARMQAQMQMQMQGGDG	GADARALMLQGVDLLA
KELAEQLGLSTGEKEK	GGYGGQSSMSGYDQVL	PHQVEQTELQQEQLQT
PLLVSVSALTLATETV	TCGIADKPMTQYQDTS	QMAAKLERLREKDKHI
VYRPPGARLTTTRKTP	STTYTSQNNAQGPLYE	KELAEQLGLSTGEKEK
KGDLPREPLVATNLPG	ARIRTRMQNDSILKSE	PLLVSVSALTLATETV
RCSRYLYTLVITDKEK	AQVATISANGDKEIGN	VYRPPGARLTTTRKTP
HIDVITAEMAKDFVED	IDLKDKYKNIGAKLVQ	KGDLPREPLVATNLPG
GPPLRGSNMDFREPTE	PEAKMRMKNIGRDTPT	RCSRYLYTLVITDKEK
VSSSSYRRMFGGPGTA	KVETVKSDNKDDDIDI	HIDVITAEMAKDFVED
RVGQTIERMGSGVERM	DYSGNYGYNNDNQEFY	GPPLRGSNMDFREPTE
GKNVIGLQMGTNRGAS	DIQPGPLFNNNADGVA	VSSSSYRRMFGGPGTA
GTRGQEPQMKETIMNQ	SVFQTNQSNNQQSNFE	NASSERLNMGEIETLD
EPQMKETIMNQEKLAK	ADAGKEGNNPAENGDA	RVGQTIERMGSGVERM
ARMQAQMQMQMQGGDG	ATPLNQVANPNSAIFG	GKNVIGLQMGTNRGAS
GGYGGQSSMSGYDQVL	ERIKQHPKNQEEYKEV	GTRGQEPQMKETIMNQ
TCGIADKPMTQYQDTS	HLQAGQCGNQIGAKFW	EPQMKETIMNQEKLAK
STTYTSQNNAQGPLYE	HIQAGQCGNQIGAKFW	ARMQAQMQMQMQGGDG
ARIRTRMQNDSILKSE	HIQAGQCGNQIGTKFW	GGYGGQSSMSGYDQVL
PVGTASLQNFNISNLQ	QALKLQLDNQYAVLEN	LASLMNLGMSSSLNQQ
AQVATISANGDKEIGN	RNILSRLANRAPEPTP	TCGIADKPMTQYQDTS
IDLKDKYKNIGAKLVQ	EGFGCVVTNRFDQLFD	STTYTSQNNAQGPLYE
PEAKMRMKNIGRDTPT	PLNQVANPNSAIFGGA	ARIRTRMQNDSILKSE
KVETVKSDNKDDDIDI	PLILKPFGNSISRYNG	PVGTASLQNFNISNLQ
PSIDKTLVNKVVHSSV	KRKVKQLFNSLATQEG	AQVATISANGDKEIGN
KVEVNNLNNLNNHDRK	SLQYEYKANSNLVLQA	IDLKDKYKNIGAKLVQ
DYSGNYGYNNDNQEFY	EASQSHLRNSPEDKRA	PEAKMRMKNIGRDTPT
DIQPGPLFNNNADGVA	SHFPMTHGNTGFSGIE	KVETVKSDNKDDDIDI
SVFQTNQSNNQQSNFE	SHRNANAEPAVQRTLL	DYSGNYGYNNDNQEFY
ADAGKEGNNPAENGDA	HEELMLGDPCLKDLKK	DIQPGPLFNNNADGVA
ATPLNQVANPNSAIFG	GPPQPWGHPDVHIMQH	SVFQTNQSNNQQSNFE
ERIKQHPKNQEEYKEV	VCTLAIIDPGDSDIIR	ADAGKEGNNPAENGDA
HLQAGQCGNQIGAKFW	FPTFKFEDPKFEVIEK	ATPLNQVANPNSAIFG
HIQAGQCGNQIGAKFW	VYSKAASVPKVETVKS	ERIKQHPKNQEEYKEV
HIQAGQCGNQIGTKFW	LVPVPVSEPVPEPEPE	HLQAGQCGNQIGAKFW
QALKLQLDNQYAVLEN	QEPANPNMPVVLTSGT	HIQAGQCGNQIGAKFW
RNILSRLANRAPEPTP	PKAEVARAQAALAVNI	QALKLQLDNQYAVLEN
EGFGCVVTNRFDQLFD	SQIDVALSQDSTYQGE	RNILSRLANRAPEPTP
PLNQVANPNSAIFGGA	MSGYDQVLQENSSDFQ	EGFGCVVTNRFDQLFD
PLILKPFGNSISRYNG	KVQNGSVHQKDGLNDD	PLNQVANPNSAIFGGA
KRKVKQLFNSLATQEG	KKKASSKKQKTENVFV	PLILKPFGNSISRYNG
SLQYEYKANSNLVLQA	KPANDITSQLEINFGD	KRKVKQLFNSLATQEG
EASQSHLRNSPEDKRA	LGMSSSLNQQGAHSAL	SLQYEYKANSNLVLQA
SHFPMTHGNTGFSGIE	REQMEQMKQRIAEENI	EASQSHLRNSPEDKRA
SGQKTVLSNVQEELDR	AGPSRAVRQSVTSFPD	SHFPMTHGNTGFSGIE
YGEYMDKNNVRRQATT	RFAVRDMRQTVAVGVI	SGQKTVLSNVQEELDR
SHRNANAEPAVQRTLL	RTVATPLNQVANPNSA	YGEYMDKNNVRRQATT
DLEDYVARPDKISGAD	KTVETRDGQVINETSQ	SHRNANAEPAVQRTLL
GPPQPWGHPDVHIMQH	VKAKFFSRRAEEKIKS	DLEDYVARPDKISGAD
VCTLAIIDPGDSDIIR	LRNSPEDKRAGGEESQ	GPPQPWGHPDVHIMQH
FPTFKFEDPKFEVIEK	NNPQRTGQRAQENYEG	FLNGEDWKPGALDDAL
VYSKAASVPKVETVKS	TGAGKHVPRAVFVDLE	VCTLAIIDPGDSDIIR
QEPANPNMPVVLTSGT	VVRHKNRGRDEVSKNQ	FPTFKFEDPKFEVIEK
PKAEVARAQAALAVNI	VNVDKVLERDQKLSEL	LVPVPVSEPVPEPEPE
ILYEHQLGQASGLGGS	EKFEPTVFRDTLVQGL	QEPANPNMPVVLTSGT
SQIDVALSQDSTYQGE	SPPQKRMRRDWDEHSS	PKAEVARAQAALAVNI
MSGYDQVLQENSSDFQ	TLSGGGDQREAQTLDS	ILYEHQLGQASGLGGS
MGGKFMKSQGLSQLYH	PEAAQMVRREFQLDLD	SQIDVALSQDSTYQGE
LTTTRKTPQGPPEIYS	MAAKLERLREKDKHIE	MSGYDQVLQENSSDFQ
KVQNGSVHQKDGLNDD	QVRAALLSRELAGGLE	MGGKFMKSQGLSQLYH
KKKASSKKQKTENVFV	PNFSSLNLRETNLDSL	LTTTRKTPQGPPEIYS
KPANDITSQLEINFGD	GFGCVVTNRFDQLFDD	KVQNGSVHQKDGLNDD
LGMSSSLNQQGAHSAL	SDNGVRVQRFFVADTA	KKKASSKKQKTENVFV
REQMEQMKQRIAEENI	EKLKKRKERFGIVTSS	KPANDITSQLEINFGD
KKEDALLYQSKGYNDD	GSQSSKAPRGDVTAEE	LGMSSSLNQQGAHSAL
AGPSRAVRQSVTSFPD	QAILAAQRRGEDVETS	REQMEQMKQRIAEENI
RFAVRDMRQTVAVGVI	VRLYVELHRGEELGGG	KKEDALLYQSKGYNDD
RTVATPLNQVANPNSA	TKKKRGSYRGGSISVQ	AGPSRAVRQSVTSFPD
KTVETRDGQVINETSQ	EQMEQMKQRIAEENIM	RFAVRDMRQTVAVGVI
IKALEAHKRAEEFLTA	GLNVSSISRKSEDDEK	RTVATPLNQVANPNSA
VKAKFFSRRAEEKIKS	HRRQEELKRLEENDDD	KTVETRDGQVINETSQ
LRNSPEDKRAGGEESQ	RLGRSKRKRLEVEEPL	IKALEAHKRAEEFLTA
NNPQRTGQRAQENYEG	LERKKETQRLLEEEDS	VKAKFFSRRAEEKIKS
KETRGQPARAVDLVEE	FSVNASSERLNMGEIE	LRNSPEDKRAGGEESQ
TGAGKHVPRAVFVDLE	GRFAVRDMRQTVAVGV	NNPQRTGQRAQENYEG
VVRHKNRGRDEVSKNQ	QGKRKTLQRRDLDNAI	KETRGQPARAVDLVEE
VNVDKVLERDQKLSEL	EKRASSPFRRVREEEI	TGAGKHVPRAVFVDLE
EKFEPTVFRDTLVQGL	DSSGPALKRSFEVEEV	VVRHKNRGRDEVSKNQ
SPPQKRMRRDWDEHSS	GQIPGRERRSGPTDDG	VNVDKVLERDQKLSEL
TLSGGGDQREAQTLDS	KELVLDNSRSNEGKLE	EKFEPTVFRDTLVQGL
PEAAQMVRREFQLDLD	GGRPNRGSRTDKSSAS	SPPQKRMRRDWDEHSS
MAAKLERLREKDKHIE	EVEGKMVSRTEGNIDD	TLSGGGDQREAQTLDS
QVRAALLSRELAGGLE	DHKSTSHFRTGEEDKK	PEAAQMVRREFQLDLD
PNFSSLNLRETNLDSL	EKDRESLRRTKNETDE	MAAKLERLREKDKHIE
FSDYPPLGRFAVRDMR	PLVDTHSKRTLLIKTV	QVRAALLSRELAGGLE
GFGCVVTNRFDQLFDD	TPVTLKQRRVEHNQSY	PNFSSLNLRETNLDSL
SDNGVRVQRFFVADTA	GSRRTPRKRVETSEHF	FSDYPPLGRFAVRDMR
EKLKKRKERFGIVTSS	NVYKKEKARVITEEEK	GFGCVVTNRFDQLFDD
GSQSSKAPRGDVTAEE	MGGTTSTRRVTFEADE	EKLKKRKERFGIVTSS
QAILAAQRRGEDVETS	LNQVANPNSAIFGGAR	GSQSSKAPRGDVTAEE
VRLYVELHRGEELGGG	KQKADVTLSALNDSDA	QAILAAQRRGEDVETS
TKKKRGSYRGGSISVQ	NSSFYSTRSAPASQAS	VRLYVELHRGEELGGG
EQMEQMKQRIAEENIM	GQYIENLMSASSVFQT	TKKKRGSYRGGSISVQ
RVETSEHFRIDGPVIS	SPRTAVAPSAVNLADP	EQMEQMKQRIAEENIM
HRRQEELKRLEENDDD	QAAAQQGYSAYTAQPT	RVETSEHFRIDGPVIS
RLGRSKRKRLEVEEPL	RQRTAEAFSDEKTQIV	GLNVSSISRKSEDDEK
LERKKETQRLLEEEDS	YTEHQVVSSDFNSDTH	HRRQEELKRLEENDDD
EIRTLAVERLLEPLVT	IQPDGQMPSDKTIGGG	RLGRSKRKRLEVEEPL
FSVNASSERLNMGEIE	RKGTGLLSSDYRIING	LERKKETQRLLEEEDS
AQMAAKLERLREKDKH	EVEKNSTPSEPGSGRG	EIRTLAVERLLEPLVT
GRFAVRDMRQTVAVGV	EMPDTVLQSETLKDTA	FSVNASSERLNMGEIE
QGKRKTLQRRDLDNAI	ESNMNDLVSEYQQYQD	AQMAAKLERLREKDKH
EKRASSPFRRVREEEI	YYSQSQGDSEYYDYGH	GRFAVRDMRQTVAVGV
DSSGPALKRSFEVEEV	LKEKIDRRSGKKLEDG	QGKRKTLQRRDLDNAI
GQIPGRERRSGPTDDG	PSNYGPMKSGNFGGSR	EKRASSPFRRVREEEI
KELVLDNSRSNEGKLE	ERLKGLLQSGQIPGRE	DSSGPALKRSFEVEEV
GGRPNRGSRTDKSSAS	RDEVSHLQSGSHLANN	GQIPGRERRSGPTDDG
EVEGKMVSRTEGNIDD	GYGGQSSMSGYDQVLQ	KELVLDNSRSNEGKLE
DHKSTSHFRTGEEDKK	AFVQPTQQSHPQIEPA	GGRPNRGSRTDKSSAS
EKDRESLRRTKNETDE	NVPASVCYSHTDIKVP	EVEGKMVSRTEGNIDD
PLVDTHSKRTLLIKTV	FTTSVVRRSHYEEGPG	DHKSTSHFRTGEEDKK
AVTMGPKGRTVIIEQS	TTATVLARSIAKEGFE	EKDRESLRRTKNETDE
TPVTLKQRRVEHNQSY	LSCNSNFHSIASVLLQ	PLVDTHSKRTLLIKTV
GSRRTPRKRVETSEHF	KDGVTVAKSIDLKDKY	AVTMGPKGRTVIIEQS
NVYKKEKARVITEEEK	PSSATADTSIFAGQND	TPVTLKQRRVEHNQSY
MGGTTSTRRVTFEADE	PYTLAPATSILEYPIE	NVYKKEKARVITEEEK
LNQVANPNSAIFGGAR	TLATETVRSILKIDDV	MGGTTSTRRVTFEADE
KQKADVTLSALNDSDA	VMQVADLQSINISGNG	LNQVANPNSAIFGGAR
EEILITVLSAMTEEAA	FNISNLQKSISNPPGS	KQKADVTLSALNDSDA
NSSFYSTRSAPASQAS	QRFGLNVSSISRKSED	EEILITVLSAMTEEAA
GQYIENLMSASSVFQT	EKKISSIQSIVPALEI	NSSFYSTRSAPASQAS
SPRTAVAPSAVNLADP	DLIKLHPESKDDKHGS	GQYIENLMSASSVFQT
QAAAQQGYSAYTAQPT	RGRGAGRNSKQQLSAE	SPRTAVAPSAVNLADP
RQRTAEAFSDEKTQIV	EDRVGTIKSKVVGDRE	QAAAQQGYSAYTAQPT
YTEHQVVSSDFNSDTH	PASKFSSASKYAALSV	RQRTAEAFSDEKTQIV
IQPDGQMPSDKTIGGG	WVFKVSHFSKYGLQDS	YTEHQVVSSDFNSDTH
LELRNRTPSDVKELVL	VTTSTRTYSLGSALRP	IQPDGQMPSDKTIGGG
RKGTGLLSSDYRIING	PVYRQPPESLKLEAGD	RKGTGLLSSDYRIING
EVEKNSTPSEPGSGRG	AKDGAPRRSLNLEDYK	EVEKNSTPSEPGSGRG
EMPDTVLQSETLKDTA	NLRETNLDSLPLVDTH	EMPDTVLQSETLKDTA
ESNMNDLVSEYQQYQD	TACPGRVPSMVSTSLN	ESNMNDLVSEYQQYQD
YYSQSQGDSEYYDYGH	ASTASQLHSNVVNYVQ	YYSQSQGDSEYYDYGH
LKEKIDRRSGKKLEDG	RSAMPFTASPASSTTA	LKEKIDRRSGKKLEDG
PSNYGPMKSGNFGGSR	ASQSHLRNSPEDKRAG	PSNYGPMKSGNFGGSR
ERLKGLLQSGQIPGRE	KEVYELLDSPGKVLLQ	ERLKGLLQSGQIPGRE
TDCTFIRVSGSELVQK	SIVSSPLNSPLDRSGI	TDCTFIRVSGSELVQK
RDEVSHLQSGSHLANN	RVEHNQSYSQAGITET	RDEVSHLQSGSHLANN
GYGGQSSMSGYDQVLQ	QMGTNRGASQAGMTGY	GYGGQSSMSGYDQVLQ
NVPASVCYSHTDIKVP	RNRKVVDYSQFQESDD	NVPASVCYSHTDIKVP
TTATVLARSIAKEGFE	RTAAFRALSQGVESVK	TTATVLARSIAKEGFE
LSCNSNFHSIASVLLQ	TKQNSVPPSQTKSETS	LSCNSNFHSIASVLLQ
KDGVTVAKSIDLKDKY	NNEQPTLQSSAQLLLQ	KDGVTVAKSIDLKDKY
PSSATADTSIFAGQND	TIPGVTSPSSDEPPME	PSSATADTSIFAGQND
PYTLAPATSILEYPIE	LLGFSVNASSERLNMG	PYTLAPATSILEYPIE
TLATETVRSILKIDDV	AQRFGLNVSSISRKSE	TLATETVRSILKIDDV
VMQVADLQSINISGNG	ARSQAPLESSLDSLGD	VMQVADLQSINISGNG
FNISNLQKSISNPPGS	ISLPLPNFSSLNLRET	FNISNLQKSISNPPGS
QRFGLNVSSISRKSED	RSQPAFMQSSLSQPSV	QRFGLNVSSISRKSED
EKKISSIQSIVPALEI	PQDLPQRKSSLVTSKL	DLIKLHPESKDDKHGS
DLIKLHPESKDDKHGS	SNIVEVVQSSPVERPS	RGRGAGRNSKQQLSAE
RGRGAGRNSKQQLSAE	HSSGTVTSSSSTANID	RPRSPGSNSKVPEIEV
RPRSPGSNSKVPEIEV	SDFNSDTHSSTFDAGA	EDRVGTIKSKVVGDRE
EDRVGTIKSKVVGDRE	TPKTPKGPSSVEDIKA	PASKFSSASKYAALSV
PASKFSSASKYAALSV	RSSAVRLRSSVPGVRL	WVFKVSHFSKYGLQDS
WVFKVSHFSKYGLQDS	LAPASTLQSSYQIPTE	VTTSTRTYSLGSALRP
VTTSTRTYSLGSALRP	RPLRPGQYSTISEVAL	PVYRQPPESLKLEAGD
PVYRQPPESLKLEAGD	PEQPPEGSSTPAEPEP	AKDGAPRRSLNLEDYK
AKDGAPRRSLNLEDYK	SYSFSDLNSTRGDADM	NLRETNLDSLPLVDTH
NLRETNLDSLPLVDTH	EETTAGEQSTRSFILD	PAARSSLGSLQTPEAV
PAARSSLGSLQTPEAV	ATQLQTTQSVEGATGS	TACPGRVPSMVSTSLN
TACPGRVPSMVSTSLN	SAAFSSVGSVITKKLE	ASTASQLHSNVVNYVQ
ASTASQLHSNVVNYVQ	VAEKLEALSVKEETKE	RSAMPFTASPASSTTA
RSAMPFTASPASSTTA	YGHGEVQDSYEAYGQD	ASQSHLRNSPEDKRAG
ASQSHLRNSPEDKRAG	KQQNQYQASYNQSFSS	KEVYELLDSPGKVLLQ
KEVYELLDSPGKVLLQ	QRRVEHNQSYSQAGIT	SIVSSPLNSPLDRSGI
SIVSSPLNSPLDRSGI	AAPVAADTTAAPAAAA	RVEHNQSYSQAGITET
RVEHNQSYSQAGITET	NRHAQGEKTAGINVRK	QMGTNRGASQAGMTGY
QMGTNRGASQAGMTGY	IDPTKVVRTALLDAAG	RNRKVVDYSQFQESDD
RNRKVVDYSQFQESDD	SARTPAIPTAVNLADS	RTAAFRALSQGVESVK
RTAAFRALSQGVESVK	KVKSLKFATEAAITIL	TKQNSVPPSQTKSETS
TKQNSVPPSQTKSETS	ETVISTKKTEKSNIEE	NVKFKVRCSRYLYTLV
NVKFKVRCSRYLYTLV	AANASATTTEPLPEKT	TIPGVTSPSSDEPPME
NNEQPTLQSSAQLLLQ	SVSALTLATETVRSIL	AQRFGLNVSSISRKSE
TIPGVTSPSSDEPPME	YSQAGITETEWTSGSS	APSDFINFSSLDDEGD
YNNPAGLYSSENISNF	MQQSHFPMTHGNTGFS	ARSQAPLESSLDSLGD
LLGFSVNASSERLNMG	TVSVTELQTHPELDTD	ISLPLPNFSSLNLRET
AQRFGLNVSSISRKSE	RTLKIPAMTIAKNAGV	RSQPAFMQSSLSQPSV
APSDFINFSSLDDEGD	AYSIQGQHTISPLDLA	PQDLPQRKSSLVTSKL
ARSQAPLESSLDSLGD	TQEKNTLPTKETIEQE	SNIVEVVQSSPVERPS
ISLPLPNFSSLNLRET	KHLTHAQSTLDAKATK	HSSGTVTSSSSTANID
RSQPAFMQSSLSQPSV	PYLTGKRHTLEKNVLV	SDFNSDTHSSTFDAGA
PQDLPQRKSSLVTSKL	ERSYVSKPTLKEVVIV	TPKTPKGPSSVEDIKA
SNIVEVVQSSPVERPS	LVDTHSKRTLLIKTVE	RSSAVRLRSSVPGVRL
SDFNSDTHSSTFDAGA	KTETQEKNTLPTKETI	LAPASTLQSSYQIPTE
TPKTPKGPSSVEDIKA	VRCSRYLYTLVITDKE	RPLRPGQYSTISEVAL
RSSAVRLRSSVPGVRL	SRQAQKVATPLPDPMA	PEQPPEGSSTPAEPEP
LAPASTLQSSYQIPTE	KKQQISLATQMVRMIL	SYSFSDLNSTRGDADM
RPLRPGQYSTISEVAL	PQTTFGVQTQPQPQSL	EETTAGEQSTRSFILD
PEQPPEGSSTPAEPEP	CGIADKPMTQYQDTSK	DGAATRLMSTVKPLRE
SYSFSDLNSTRGDADM	TLLIKTVETRDGQVIN	ATQLQTTQSVEGATGS
EETTAGEQSTRSFILD	TVKQGISRTSANVTIR	SAAFSSVGSVITKKLE
ATQLQTTQSVEGATGS	RFPTDYASTSEDEFGS	VAEKLEALSVKEETKE
SAAFSSVGSVITKKLE	GETLQMLTTSTTLEKL	YGHGEVQDSYEAYGQD
VAEKLEALSVKEETKE	AAAPVAADTTAAPAAA	KQQNQYQASYNQSFSS
PDRIMNTFSVVPSPKV	AAGVASLLTTAEVVVT	QRRVEHNQSYSQAGIT
TRLSPPRASYDDPYKK	SESVSTTTTTHITKTV	AAPVAADTTAAPAAAA
YGHGEVQDSYEAYGQD	YRPPGARLTTTRKTPQ	AGVASLLTTAEVVVTE
KQQNQYQASYNQSFSS	PAGIYHRFTVDEKNYT	NRHAQGEKTAGINVRK
QRRVEHNQSYSQAGIT	SKRTLLIKTVETRDGQ	IDPTKVVRTALLDAAG
AAPVAADTTAAPAAAA	AVFVDLEPTVIDEVRT	SARTPAIPTAVNLADS
AGVASLLTTAEVVVTE	KKLGELTGTVKESLHE	KVKSLKFATEAAITIL
NRHAQGEKTAGINVRK	TTTTHITKTVKGGISE	ETVISTKKTEKSNIEE
IDPTKVVRTALLDAAG	AASVPKVETVKSDNKD	AANASATTTEPLPEKT
SARTPAIPTAVNLADS	SALTLATETVRSILKI	SVSALTLATETVRSIL
KVKSLKFATEAAITIL	TLKMSVQPTVSLGGFE	YSQAGITETEWTSGSS
ETVISTKKTEKSNIEE	ELQQEQLQTVVGTYHG	MQQSHFPMTHGNTGFS
AANASATTTEPLPEKT	TVATPLNQVANPNSAI	TVSVTELQTHPELDTD
SVSALTLATETVRSIL	AVRDMRQTVAVGVIKA	RTLKIPAMTIAKNAGV
YSQAGITETEWTSGSS	RDMRQTVAVGVIKAVD	AYSIQGQHTISPLDLA
MQQSHFPMTHGNTGFS	LAFIKRTPVIDADKPV	TQEKNTLPTKETIEQE
TVSVTELQTHPELDTD	MRQTVAVGVIKAVDKK	KHLTHAQSTLDAKATK
RTLKIPAMTIAKNAGV	GFGEISSPVIREAEVT	PYLTGKRHTLEKNVLV
AYSIQGQHTISPLDLA	FPLATYAPVISAEKAY	ERSYVSKPTLKEVVIV
TQEKNTLPTKETIEQE	VYKKEKARVITEEEKN	LVDTHSKRTLLIKTVE
KHLTHAQSTLDAKATK	MKKVGRKGVITVKDGK	KTETQEKNTLPTKETI
PYLTGKRHTLEKNVLV	KKEKKQKPVLEEQVIK	VRCSRYLYTLVITDKE
ERSYVSKPTLKEVVIV	SSMSGYDQVLQENSSD	SRQAQKVATPLPDPMA
LVDTHSKRTLLIKTVE	NMNAPVPPVNEPETLK	KKQQISLATQMVRMIL
KTETQEKNTLPTKETI	MASLSLAPVNIFKAGA	QVKYSTLHTQSAEPPP
VRCSRYLYTLVITDKE	YPPLGRFAVRDMRQTV	CGIADKPMTQYQDTSK
SRQAQKVATPLPDPMA	GIIDPTKVVRTALLDA	TLLIKTVETRDGQVIN
KKQQISLATQMVRMIL	LGGQDQLRVRVTELED	QTLPVAPRTRTSQEEL
PQTTFGVQTQPQPQSL	VRSIQEAPVSEDLVIR	TVKQGISRTSANVTIR
QVKYSTLHTQSAEPPP	IRYVERSYVSKPTLKE	RFPTDYASTSEDEFGS
CGIADKPMTQYQDTSK	RAQRFGLNVSSISRKS	GETLQMLTTSTTLEKL
TLLIKTVETRDGQVIN	PKSGPSVPVSVQTKDD	AAAPVAADTTAAPAAA
QTLPVAPRTRTSQEEL	ELVVQPLLVSVSALTL	AAGVASLLTTAEVVVT
TVKQGISRTSANVTIR	GQDQLRVRVTELEDEV	SESVSTTTTTHITKTV
RFPTDYASTSEDEFGS	DVAGKPNEVTKAAESP	YRPPGARLTTTRKTPQ
GETLQMLTTSTTLEKL	RDLPTIPGVTSPSSDE	PAGIYHRFTVDEKNYT
AAAPVAADTTAAPAAA	KGIIDPTKVVRTALLD	SKRTLLIKTVETRDGQ
AAGVASLLTTAEVVVT	DDDLGSSNWEAADLGN	AVFVDLEPTVIDEVRT
SESVSTTTTTHITKTV	LAPHLTRAYAKDVKFG	KKLGELTGTVKESLHE
YRPPGARLTTTRKTPQ	HFVKLISWYDNEFGYS	TTTTHITKTVKGGISE
PAGIYHRFTVDEKNYT	SKDDKHGSYEDAVHSG	AASVPKVETVKSDNKD
SKRTLLIKTVETRDGQ	NTQPIPILYEHQLGQA	SALTLATETVRSILKI
AVFVDLEPTVIDEVRT	TSRSLALMYESEKVGV	TLKMSVQPTVSLGGFE
KKLGELTGTVKESLHE	FGGRSSGPYGGGGQYF	ELQQEQLQTVVGTYHG
TTTTHITKTVKGGISE	EVQDSYEAYGQDDWNG	TVATPLNQVANPNSAI
AASVPKVETVKSDNKD	YYRQQVAFYGQTLGQA	AVRDMRQTVAVGVIKA
SALTLATETVRSILKI	TVGAGAYAYKTMKEDE	RDMRQTVAVGVIKAVD
TLKMSVQPTVSLGGFE	GSEISDSDYQAEYPDE	LAFIKRTPVIDADKPV
ELQQEQLQTVVGTYHG	IGYMGQTAYQYPPPPP	MRQTVAVGVIKAVDKK
TVATPLNQVANPNSAI	GDPRAIVEYRDLDAPD	GFGEISSPVIREAEVT
AVRDMRQTVAVGVIKA	VRNRKVVDYSQFQESD	FPLATYAPVISAEKAY
RDMRQTVAVGVIKAVD	ENLKKTPKKKMKMVTG	VYKKEKARVITEEEKN
LAFIKRTPVIDADKPV	TENTDESNHDPQFEPI	MKKVGRKGVITVKDGK
MRQTVAVGVIKAVDKK	NTDESNHDPQFEPIVS	KKEKKQKPVLEEQVIK
GFGEISSPVIREAEVT	NHDPQFEPIVSLPEQE	SSMSGYDQVLQENSSD
FPLATYAPVISAEKAY	VDTPSGTNSGAGKKRF	NMNAPVPPVNEPETLK
VYKKEKARVITEEEKN	RFAGKVTTASVKERRE	MASLSLAPVNIFKAGA
MKKVGRKGVITVKDGK	FAGKVTTASVKERREI	YPPLGRFAVRDMRQTV
VFGNKSTNVIVDSGGF	EEAREKMLAAKSADGS	GIIDPTKVVRTALLDA
KKEKKQKPVLEEQVIK	EAREKMLAAKSADGSA	LGGQDQLRVRVTELED
SSMSGYDQVLQENSSD	TSTVSTLESSPSSPEP	VRSIQEAPVSEDLVIR
NMNAPVPPVNEPETLK	LRKESQKDRKNPLPPS	IRYVERSYVSKPTLKE
MASLSLAPVNIFKAGA	LRIDDLIKLHPESKDD	RAQRFGLNVSSISRKS
YPPLGRFAVRDMRQTV	DDLIKLHPESKDDKHG	PKSGPSVPVSVQTKDD
GIIDPTKVVRTALLDA	ISAARGLQDVLRTNLG	ELVVQPLLVSVSALTL
LGGQDQLRVRVTELED	RGLQDVLRTNLGPKGT	GQDQLRVRVTELEDEV
VRSIQEAPVSEDLVIR	HHEEEIVHHKKEIERL	DVAGKPNEVTKAAESP
IRYVERSYVSKPTLKE	EIQKDVQTYYGQVLKR	RDLPTIPGVTSPSSDE
RAQRFGLNVSSISRKS	QKDVQTYYGQVLKRSA	KGIIDPTKVVRTALLD
PKSGPSVPVSVQTKDD	TYYGQVLKRSADLQTN	DDDLGSSNWEAADLGN
ELVVQPLLVSVSALTL	KKAFTELQAKVIDTQQ	LAPHLTRAYAKDVKFG
GQDQLRVRVTELEDEV	QIQVQHVQAAQQIQAA	SKDDKHGSYEDAVHSG
DVAGKPNEVTKAAESP	VQHVQAAQQIQAAEIP	NTQPIPILYEHQLGQA
RDLPTIPGVTSPSSDE	QAAQQIQAAEIPEEHI	TSRSLALMYESEKVGV
KGIIDPTKVVRTALLD	AQLVAGQSLAGGQQIQ	FGGRSSGPYGGGGQYF
DDDLGSSNWEAADLGN	AATGRIVAVIGAVVDV	YYRQQVAFYGQTLGQA
LAPHLTRAYAKDVKFG	ESHPHGVKRSASPDDD	TVGAGAYAYKTMKEDE
HFVKLISWYDNEFGYS	RSTAPSAAASASASAA	GSEISDSDYQAEYPDE
SKDDKHGSYEDAVHSG	SQAVEEMRSRVVLGEF	IGYMGQTAYQYPPPPP
NTQPIPILYEHQLGQA	QAVEEMRSRVVLGEFG	GDPRAIVEYRDLDAPD
TSRSLALMYESEKVGV	SRVVLGEFGVRNVHTT	VRNRKVVDYSQFQESD
FGGRSSGPYGGGGQYF	GPMDKKEE________	ENLKKTPKKKMKMVTG
YYRQQVAFYGQTLGQA	KENVQPLRQGRIMSTL	TENTDESNHDPQFEPI
TVGAGAYAYKTMKEDE	NVQPLRQGRIMSTLQG	NTDESNHDPQFEPIVS
GSEISDSDYQAEYPDE	AAVKTLNPKAEVARAQ	NHDPQFEPIVSLPEQE
PKKEDALLYQSKGYND	AVKTLNPKAEVARAQA	VDTPSGTNSGAGKKRF
IGYMGQTAYQYPPPPP	VKTLNPKAEVARAQAA	ANGIESLGVKPDLPPP
GDPRAIVEYRDLDAPD	KTLNPKAEVARAQAAL	RFAGKVTTASVKERRE
VRNRKVVDYSQFQESD	TLNPKAEVARAQAALA	FAGKVTTASVKERREI
ENLKKTPKKKMKMVTG	AALAVNISAARGLQDV	EEAREKMLAAKSADGS
TENTDESNHDPQFEPI	EVSVDGLTLSPDPEER	EAREKMLAAKSADGSA
NTDESNHDPQFEPIVS	AAEVKVDGSEPKLSKN	LRKESQKDRKNPLPPS
NHDPQFEPIVSLPEQE	SEPKLSKNELKRRLKA	LRIDDLIKLHPESKDD
VDTPSGTNSGAGKKRF	RTRISLLQREAAQAMY	DDLIKLHPESKDDKHG
SSGQVTSNGSIGRDPP	APYKKDENKLSSANGH	ISAARGLQDVLRTNLG
ANGIESLGVKPDLPPP	KKDENKLSSANGHEER	RGLQDVLRTNLGPKGT
TQVSETLKRFAGKVTT	KDENKLSSANGHEERS	VLRTNLGPKGTMKMLV
ETLKRFAGKVTTASVK	ENKLSSANGHEERSKK	HHEEEIVHHKKEIERL
RFAGKVTTASVKERRE	ALRRQRLAELQAKHGD	EIQKDVQTYYGQVLKR
FAGKVTTASVKERREI	RQRLAELQAKHGDPGD	QKDVQTYYGQVLKRSA
EEAREKMLAAKSADGS	KEGVKTENNDHINLKV	KDVQTYYGQVLKRSAD
EAREKMLAAKSADGSA	EAAKNASNTEKLTDQV	TYYGQVLKRSADLQTN
TSTVSTLESSPSSPEP	KLKARQLTVQMMQNPQ	KKAFTELQAKVIDTQQ
LRKESQKDRKNPLPPS	ERAYQKQPTIFQNKKR	QIQVQHVQAAQQIQAA
LSAPPHFHFGQTNRTP	SLDELIRKRGAAAKGR	VQHVQAAQQIQAAEIP
AITILRIDDLIKLHPE	ELIRKRGAAAKGRLNA	QAAQQIQAAEIPEEHI
LRIDDLIKLHPESKDD	LIRKRGAAAKGRLNAR	PEEHIPHQQIQAQLVA
DDLIKLHPESKDDKHG	IRKRGAAAKGRLNARP	HQQIQAQLVAGQSLAG
ISAARGLQDVLRTNLG	KRGAAAKGRLNARPGV	QIQAQLVAGQSLAGGQ
ARGLQDVLRTNLGPKG	LDDIIKLNRSQRGGRG	AQLVAGQSLAGGQQIQ
RGLQDVLRTNLGPKGT	SFDKAKLKKTETQEKN	AATGRIVAVIGAVVDV
HHEEEIVHHKKEIERL	EERKQKFLRLMGAGKK	ESHPHGVKRSASPDDD
QKDVQTYYGQVLKRSA	ERKQKFLRLMGAGKKE	RSTAPSAAASASASAA
KDVQTYYGQVLKRSAD	QKFLRLMGAGKKEHTG	STAPSAAASASASAAA
TYYGQVLKRSADLQTN	EKLDNQRLKNFKNKGR	AAAVPSSGSGVGGGGT
KKAFTELQAKVIDTQQ	KLDNQRLKNFKNKGRD	SQAVEEMRSRVVLGEF
QIQVQHVQAAQQIQAA	QRLKNFKNKGRDLETM	QAVEEMRSRVVLGEFG
VQHVQAAQQIQAAEIP	LTAASTAPISFGFTRT	EMRSRVVLGEFGVRNV
PEEHIPHQQIQAQLVA	AASTAPISFGFTRTSA	SRVVLGEFGVRNVHTT
HQQIQAQLVAGQSLAG	DVTARSLQYEYKANSN	GPMDKKEE________
QIQAQLVAGQSLAGGQ	ANSNLVLQADRSLIDR	KENVQPLRQGRIMSTL
AQLVAGQSLAGGQQIQ	GETVGKTDYIPLLDVD	NVQPLRQGRIMSTLQG
AATGRIVAVIGAVVDV	VGKTDYIPLLDVDEKT	AAVKTLNPKAEVARAQ
ESHPHGVKRSASPDDD	KTDYIPLLDVDEKTGN	AVKTLNPKAEVARAQA
RSTAPSAAASASASAA	EVEDPKNKKDAKSNYK	VKTLNPKAEVARAQAA
AAAVPSSGSGVGGGGT	GQLVGVDLNTGEPMVA	KTLNPKAEVARAQAAL
SQAVEEMRSRVVLGEF	AVQRTLLEK_______	TLNPKAEVARAQAALA
QAVEEMRSRVVLGEFG	VQRTLLEK________	AALAVNISAARGLQDV
EMRSRVVLGEFGVRNV	QKLINPVKTSRNHQDL	AAEVKVDGSEPKLSKN
SRVVLGEFGVRNVHTT	PPPEPARI________	SEPKLSKNELKRRLKA
GPMDKKEE________	KSSLNSSPWSGLMALG	RTRISLLQREAAQAMY
KENVQPLRQGRIMSTL	AEQVALSRTQVCGILR	APYKKDENKLSSANGH
NVQPLRQGRIMSTLQG	QVALSRTQVCGILREE	KKDENKLSSANGHEER
AAVKTLNPKAEVARAQ	WDTVTVLRKKGPTAAQ	KDENKLSSANGHEERS
AVKTLNPKAEVARAQA	TVLRKKGPTAAQAKSK	ENKLSSANGHEERSKK
VKTLNPKAEVARAQAA	TEERSLDNFFAKRDKK	ALRRQRLAELQAKHGD
KTLNPKAEVARAQAAL	EERSLDNFFAKRDKKK	RQRLAELQAKHGDPGD
TLNPKAEVARAQAALA	SLDNFFAKRDKKKKKE	KEGVKTENNDHINLKV
AALAVNISAARGLQDV	DNFFAKRDKKKKKERS	DSVEAAKNASNTEKLT
EVSVDGLTLSPDPEER	NFFAKRDKKKKKERSN	EAAKNASNTEKLTDQV
AAEVKVDGSEPKLSKN	FFAKRDKKKKKERSNR	KLKARQLTVQMMQNPQ
SEPKLSKNELKRRLKA	ETVADTRRLITKPQNL	ERAYQKQPTIFQNKKR
RTRISLLQREAAQAMY	KTEERRVERDILKEMF	SLDELIRKRGAAAKGR
KKDENKLSSANGHEER	EAEAMNYEGSPIKVTL	ELIRKRGAAAKGRLNA
KDENKLSSANGHEERS	ASEKESVM________	LIRKRGAAAKGRLNAR
ENKLSSANGHEERSKK	GLGLEFQA________	IRKRGAAAKGRLNARP
ALRRQRLAELQAKHGD	GLALELEA________	LDDIIKLNRSQRGGRG
RQRLAELQAKHGDPGD	SAQKAQKAK_______	SFDKAKLKKTETQEKN
DSVEAAKNASNTEKLT	FEDADVDH________	AKLKKTETQEKNTLPT
EAAKNASNTEKLTDQV	EAAQKVGAVAAATS__	EERKQKFLRLMGAGKK
EKLTDQVMQNPRVLAA	APAIESVD________	ERKQKFLRLMGAGKKE
KLKARQLTVQMMQNPQ	NLESMDTS________	QKFLRLMGAGKKEHTG
ERAYQKQPTIFQNKKR	NLADSRTPAAAAAMNL	EKLDNQRLKNFKNKGR
ELIRKRGAAAKGRLNA	KFGADARALMLQGVDL	KLDNQRLKNFKNKGRD
LIRKRGAAAKGRLNAR	DARALMLQGVDLLADA	QRLKNFKNKGRDLETM
KRGAAAKGRLNARPGV	KTHEDIEAQIREIQGK	LTAASTAPISFGFTRT
LDDIIKLNRSQRGGRG	AQIREIQGKKAALDEA	AASTAPISFGFTRTSA
SFDKAKLKKTETQEKN	PKPKKAPAKKGEKVPK	DVTARSLQYEYKANSN
AKLKKTETQEKNTLPT	EERADATNVNNWHWTE	ANSNLVLQADRSLIDR
EERKQKFLRLMGAGKK	RADATNVNNWHWTERD	GETVGKTDYIPLLDVD
ERKQKFLRLMGAGKKE	ALEIANAHRKPLVIIA	VGKTDYIPLLDVDEKT
QKFLRLMGAGKKEHTG	KKLNFDQA________	KTDYIPLLDVDEKTGN
EKLDNQRLKNFKNKGR	KEDAEEKQ________	ETKIKNYKTAPFDSRF
QRLKNFKNKGRDLETM	AVAAELVSADKIEDVP	EVEDPKNKKDAKSNYK
LTAASTAPISFGFTRT	DVPAPSTSADKVESLD	GQLVGVDLNTGEPMVA
AASTAPISFGFTRTSA	VTERVLAPASTLQSSY	RQIAAKIDSIPHLNNS
ANSNLVLQADRSLIDR	NFGDLGRPGRGGRGGR	AVQRTLLEK_______
GETVGKTDYIPLLDVD	FGDLGRPGRGGRGGRG	VQRTLLEK________
VGKTDYIPLLDVDEKT	PFEVKVNRQKFQILGR	QKLINPVKTSRNHQDL
KTDYIPLLDVDEKTGN	FEVKVNRQKFQILGRK	PPPEPARI________
ETKIKNYKTAPFDSRF	APAIIFIDEIDAIATK	KSSLNSSPWSGLMALG
EVEDPKNKKDAKSNYK	GAVATKVRRHDMRVHP	AEQVALSRTQVCGILR
GQLVGVDLNTGEPMVA	DRVGQTIERMGSGVER	QVALSRTQVCGILREE
RQIAAKIDSIPHLNNS	TTEVKSVEMHHEALSE	WDTVTVLRKKGPTAAQ
AVQRTLLEK_______	YEQRSTQTRRYPSSIS	TVLRKKGPTAAQAKSK
VQRTLLEK________	EQRSTQTRRYPSSISS	TEERSLDNFFAKRDKK
QKLINPVKTSRNHQDL	GGALGHHV________	EERSLDNFFAKRDKKK
PPPEPARI________	AVIQHRPSRQYATLDV	SLDNFFAKRDKKKKKE
KSSLNSSPWSGLMALG	VIQHRPSRQYATLDVY	DNFFAKRDKKKKKERS
AEQVALSRTQVCGILR	QHRPSRQYATLDVYNP	NFFAKRDKKKKKERSN
QVALSRTQVCGILREE	GAASEAGRAMHLMKKR	FFAKRDKKKKKERSNR
WDTVTVLRKKGPTAAQ	ASEAGRAMHLMKKREK	ETVADTRRLITKPQNL
DTVTVLRKKGPTAAQA	EVVQKEQE________	KTEERRVERDILKEMF
TVLRKKGPTAAQAKSK	GGGGGKIRTRRCHQGP	EAEAMNYEGSPIKVTL
TEERSLDNFFAKRDKK	GGGGKIRTRRCHQGPI	ASEKESVM________
EERSLDNFFAKRDKKK	GGGKIRTRRCHQGPIK	GLGLEFQA________
SLDNFFAKRDKKKKKE	VFNDMKVRKSSTPEEV	GLALELEA________
DNFFAKRDKKKKKERS	FKKKTVDDVIKEQNRE	SKGGPLQALTRESTRG
NFFAKRDKKKKKERSN	KEQNRELRGTQRAIIR	FEDADVDH________
ETVADTRRLITKPQNL	EERAETARLTSFIGAI	EAAQKVGAVAAATS__
KTEERRVERDILKEMF	RAETARLTSFIGAIAI	APAIESVD________
EAEAMNYEGSPIKVTL	AETARLTSFIGAIAIG	NLESMDTS________
ASEKESVM________	ARLTSFIGAIAIGDLV	LTKLHQLAMQQSHFPM
GLGLEFQA________	TQQATQSYGAYPTQPG	NLADSRTPAAAAAMNL
GLALELEA________	QQATQSYGAYPTQPGQ	KFGADARALMLQGVDL
SKGGPLQALTRESTRG	EILLTELQGDSRSLPF	DARALMLQGVDLLADA
SKAIGSSPLGSGEGLL	VKELEKRASGQAFELI	KTHEDIEAQIREIQGK
TEDSIRDYEDGMEVDT	KELEKRASGQAFELIL	EAQIREIQGKKAALDE
FEDADVDH________	ELEKRASGQAFELILS	AQIREIQGKKAALDEA
EAAQKVGAVAAATS__	LEKRASGQAFELILSP	PKPKKAPAKKGEKVPK
APAIESVD________	EKRASGQAFELILSPR	KPKAAKPKKAAAKKK_
LTKLHQLAMQQSHFPM	KRASGQAFELILSPRS	EERADATNVNNWHWTE
NLADSRTPAAAAAMNL	RASGQAFELILSPRSK	RADATNVNNWHWTERD
KFGADARALMLQGVDL	SGQAFELILSPRSKES	ALEIANAHRKPLVIIA
KTHEDIEAQIREIQGK	GQAFELILSPRSKESV	KSSHSQYN________
EAQIREIQGKKAALDE	EIETLDDY________	KKLNFDQA________
AQIREIQGKKAALDEA	DSKRGEAPFAQRIDPT	KEDAEEKQ________
PKPKKAPAKKGEKVPK	SVLVLIVGLSTVGAGA	AVAAELVSADKIEDVP
KPKAAKPKKAAAKKK_	VYATRSSAVRLRSSVP	DVPAPSTSADKVESLD
EERADATNVNNWHWTE	ATRSSAVRLRSSVPGV	VTERVLAPASTLQSSY
RADATNVNNWHWTERD	AAQQGYSAYTAQPTQG	NFGDLGRPGRGGRGGR
ALEIANAHRKPLVIIA	AYTAQPTQGYAQTTQA	FGDLGRPGRGGRGGRG
KSSHSQYN________	GEEAEEEA________	PFEVKVNRQKFQILGR
KKLNFDQA________	EEAEEEVA________	FEVKVNRQKFQILGRK
KEDAEEKQ________	DELATKLSRRLQMEGE	APAIIFIDEIDAIATK
AVAAELVSADKIEDVP	KVKADTNGIIKTSTTA	GAVATKVRRHDMRVHP
VTERVLAPASTLQSSY	IDDVVNTR________	DRVGQTIERMGSGVER
NFGDLGRPGRGGRGGR	PLDFPSKKRKRSRWNQ	TTEVKSVEMHHEALSE
FGDLGRPGRGGRGGRG	QLKALGVD________	YEQRSTQTRRYPSSIS
PFEVKVNRQKFQILGR	AAVSHWQQQSYLDSGI	EQRSTQTRRYPSSISS
FEVKVNRQKFQILGRK	AVSHWQQQSYLDSGIH	GGALGHHV________
APAIIFIDEIDAIATK	EEHGGLVRKKPPPAPE	AVIQHRPSRQYATLDV
GAVATKVRRHDMRVHP	LEENEAGD________	VIQHRPSRQYATLDVY
DRVGQTIERMGSGVER	PTVIDEVRTGTYRQLF	QHRPSRQYATLDVYNP
EDLLLQDFSRNLSAKS	DEVRTGTYRQLFHPEQ	GAASEAGRAMHLMKKR
TTEVKSVEMHHEALSE	EDHTLAHSLQEQEIEH	ASEAGRAMHLMKKREK
YEQRSTQTRRYPSSIS	VKVPQKNS________	EVVQKEQE________
EQRSTQTRRYPSSISS	EEGFEGGD________	TAILKQKNRPNRLIVD
GGALGHHV________	EEEAIQLDGLNASQIR	GGGGGKIRTRRCHQGP
AVIQHRPSRQYATLDV	EKSLKSLKDKNKKLEE	GGGGKIRTRRCHQGPI
VIQHRPSRQYATLDVY	AKTGKFLKRFTDEESR	GGGKIRTRRCHQGPIK
QHRPSRQYATLDVYNP	KDEPQRRSARLSAKPA	VFNDMKVRKSSTPEEV
ASEAGRAMHLMKKREK	LTKLHQLAMQQSHFPM	FKKKTVDDVIKEQNRE
EVVQKEQE________	GKIIDRRPERRPPRER	KEQNRELRGTQRAIIR
TAILKQKNRPNRLIVD	EAMNEIRAKKRLRQSG	EQNRELRGTQRAIIRD
GGGGGKIRTRRCHQGP	PEAFPALA________	EERAETARLTSFIGAI
GGGGKIRTRRCHQGPI	DVKFGADARALMLQGV	RAETARLTSFIGAIAI
GGGKIRTRRCHQGPIK	SSSHSDLGQLASQGGL	AETARLTSFIGAIAIG
VFNDMKVRKSSTPEEV	ARSIAKEGFEKISKGA	ARLTSFIGAIAIGDLV
FKKKTVDDVIKEQNRE	EIKDFLLTARRKDAKS	TQQATQSYGAYPTQPG
IKEQNRELRGTQRAII	LSQASAAARNSLYDMA	QQATQSYGAYPTQPGQ
KEQNRELRGTQRAIIR	ARNSLYDMARYEREQY	EILLTELQGDSRSLPF
EQNRELRGTQRAIIRD	EECLKMESQLKKAHEA	VKELEKRASGQAFELI
EERAETARLTSFIGAI	YSDTQFPSLQSTAKHV	KELEKRASGQAFELIL
RAETARLTSFIGAIAI	DTQFPSLQSTAKHVES	ELEKRASGQAFELILS
AETARLTSFIGAIAIG	HIEEVRKNKESKDPAD	LEKRASGQAFELILSP
ARLTSFIGAIAIGDLV	EELGLDKV________	EKRASGQAFELILSPR
TQQATQSYGAYPTQPG	SPGKVLLQSKDQITAG	KRASGQAFELILSPRS
QQATQSYGAYPTQPGQ	QERKKVVDTTKESSRK	RASGQAFELILSPRSK
EILLTELQGDSRSLPF	KKVVDTTKESSRKGWE	SGQAFELILSPRSKES
VKELEKRASGQAFELI	TGKEDAANNYARGHYT	GQAFELILSPRSKESV
KELEKRASGQAFELIL	GKEDAANNYARGHYTI	EIETLDDY________
ELEKRASGQAFELILS	GVSISQVNHKPLRTA_	DSKRGEAPFAQRIDPT
EKRASGQAFELILSPR	IMNQEKLAKLQAQVRI	SVLVLIVGLSTVGAGA
KRASGQAFELILSPRS	QEKLAKLQAQVRIGGK	VYATRSSAVRLRSSVP
RASGQAFELILSPRSK	QVINETSQHHDDLE__	ATRSSAVRLRSSVPGV
SGQAFELILSPRSKES	EQPVRKNKMASNIFGT	AAQQGYSAYTAQPTQG
GQAFELILSPRSKESV	GPGTASRPSSSRSYVT	AYTAQPTQGYAQTTQA
EIETLDDY________	PGTASRPSSSRSYVTT	GEEAEEEA________
DSKRGEAPFAQRIDPT	TASRPSSSRSYVTTST	DELATKLSRRLQMEGE
VYATRSSAVRLRSSVP	GEVDMESHRNANAEPA	SMTNLQIKEEKVKADT
ATRSSAVRLRSSVPGV	TYQGERAYQHGGVTGL	KVKADTNGIIKTSTTA
AAQQGYSAYTAQPTQG	DENEHQLSLRTVSLGA	IDDVVNTR________
AYTAQPTQGYAQTTQA	NEHQLSLRTVSLGAGA	PLDFPSKKRKRSRWNQ
QGYAQTTQAYGQQSYG	GGLGGGLGNVLGGLIS	QLKALGVD________
GEEAEEEA________	GGLGNVLGGLISGAGG	AAVSHWQQQSYLDSGI
EEAEEEVA________	GRDSGPPTKKIRSSPR	AVSHWQQQSYLDSGIH
DELATKLSRRLQMEGE	RDSGPPTKKIRSSPRE	EEHGGLVRKKPPPAPE
KVKADTNGIIKTSTTA	DSGPPTKKIRSSPREA	LEENEAGD________
IDDVVNTR________	GPPTKKIRSSPREAKN	PTVIDEVRTGTYRQLF
PLDFPSKKRKRSRWNQ	SSPREAKNKRRSGKNS	EDHTLAHSLQEQEIEH
QLKALGVD________	INEELESQYQQSMDSK	VKVPQKNS________
AAVSHWQQQSYLDSGI	QEGKNVIGLQMGTNRG	EEGFEGGD________
AVSHWQQQSYLDSGIH	IGLQMGTNRGASQAGM	EEEAIQLDGLNASQIR
EEHGGLVRKKPPPAPE	TEQPVRKNKMASNIFG	EKSLKSLKDKNKKLEE
LEENEAGD________	VRKNKMASNIFGTPEE	AKTGKFLKRFTDEESR
PTVIDEVRTGTYRQLF	MTRAQRVRAAMFPETL	GFGSLGLMTSVLVCPD
DEVRTGTYRQLFHPEQ	TEQVNGLF________	KDEPQRRSARLSAKPA
EDHTLAHSLQEQEIEH	ATSGAVLQAATGMYEQ	GKIIDRRPERRPPRER
VKVPQKNS________	TKDGNVLLHEMQIQHP	EAMNEIRAKKRLRQSG
EEGFEGGD________	HTGRLVIGDHKSTSHF	PEAFPALA________
EEEAIQLDGLNASQIR	AEGAGDAK________	SSSHSDLGQLASQGGL
EKSLKSLKDKNKKLEE	ETSKKWAAGQNKQHSI	ARSIAKEGFEKISKGA
AKTGKFLKRFTDEESR	KVKKERDS________	DAEAPGIRDHESL___
KDEPQRRSARLSAKPA	DDGEEEDD________	GIRDHESL________
GKIIDRRPERRPPRER	SDSNLHDA________	EIKDFLLTARRKDAKS
PEAFPALA________	GEKEAKSD________	LSQASAAARNSLYDMA
DVKFGADARALMLQGV	SQASAAARNSLYDMAR	ARNSLYDMARYEREQY
SSSHSDLGQLASQGGL	SQIQETSI________	EECLKMESQLKKAHEA
ARSIAKEGFEKISKGA	QLYWSHPRKFGQGSRS	YSDTQFPSLQSTAKHV
GIRDHESL________	GLAVKELK________	DTQFPSLQSTAKHVES
EIKDFLLTARRKDAKS	TSSTRVTKHSTVQHSY	HIEEVRKNKESKDPAD
LSQASAAARNSLYDMA	MVGLANLHAMGIAPPK	QERKKVVDTTKESSRK
ARNSLYDMARYEREQY	KEEIDILSDACSKLQE	KKVVDTTKESSRKGWE
EECLKMESQLKKAHEA	QKKQEILKKFMDQHPE	TGKEDAANNYARGHYT
YSDTQFPSLQSTAKHV	VLRTNLGPKGTMKMLV	GKEDAANNYARGHYTI
DTQFPSLQSTAKHVES	GSRNMGGPYGGGNYGP	GVSISQVNHKPLRTA_
HIEEVRKNKESKDPAD	DDWNGTRPSLKAPPAR	IMNQEKLAKLQAQVRI
EELGLDKV________	VSKNQALKLQLDNQYA	QEKLAKLQAQVRIGGK
SPGKVLLQSKDQITAG	SRQLYVLGHEAMKRLQ	QVINETSQHHDDLE__
QERKKVVDTTKESSRK	AQSAGTVRSAAPPQEK	EQPVRKNKMASNIFGT
KKVVDTTKESSRKGWE	NVADSPRNKKEKSS__	AIHSPQVAGVPRFRFG
TGKEDAANNYARGHYT	GMTGYGMPRQIL____	GPGTASRPSSSRSYVT
GKEDAANNYARGHYTI	IKAVDKKAAGAGKVTK	PGTASRPSSSRSYVTT
GVSISQVNHKPLRTA_	VKDGKTLNDELEIIEG	TASRPSSSRSYVTTST
IMNQEKLAKLQAQVRI	DSVDFSLADAINTEFK	QAKARPENKQHKQTLS
QEKLAKLQAQVRIGGK	SVDFSLADAINTEFKN	GEVDMESHRNANAEPA
QVINETSQHHDDLE__	FSLADAINTEFKNTRT	EVDMESHRNANAEPAV
DYDGIGSRGDRSGFGK	EGPSDIPD________	TYQGERAYQHGGVTGL
EQPVRKNKMASNIFGT	LSVAEITNACFEPANQ	DENEHQLSLRTVSLGA
AIHSPQVAGVPRFRFG	GDSDLQLERINVYYNE	NEHQLSLRTVSLGAGA
GPGTASRPSSSRSYVT	PTGTYHGDSDLQLERI	GGLGGGLGNVLGGLIS
PGTASRPSSSRSYVTT	GDSDLQLDRISVYYNE	GGLGNVLGGLISGAGG
TASRPSSSRSYVTTST	NTFFSETGAGKHVPRA	LSEKKISSIQSIVPAL
QAKARPENKQHKQTLS	HEEEIVHHKKEIERLQ	EKKISSIQSIVPALEI
GEVDMESHRNANAEPA	PADETEAD________	GRDSGPPTKKIRSSPR
EVDMESHRNANAEPAV	SCAVYTFHVFSSLFKN	RDSGPPTKKIRSSPRE
TYQGERAYQHGGVTGL	PKMQTDKPFDQTTISL	DSGPPTKKIRSSPREA
DENEHQLSLRTVSLGA	QGLLSQLQGQSKDMPP	SGPPTKKIRSSPREAK
NEHQLSLRTVSLGAGA	DQASNILASFGLSARD	GPPTKKIRSSPREAKN
GGLGGGLGNVLGGLIS	AGTAFIQTQQLHAAMA	SSPREAKNKRRSGKNS
GGLGNVLGGLISGAGG	FIQTQQLHAAMADTFL	SESTPIAETIMASSNE
LSEKKISSIQSIVPAL	LVKSTLGPKGMDKILL	INEELESQYQQSMDSK
GRDSGPPTKKIRSSPR	IEVNVELRKAKKDDQM	QEGKNVIGLQMGTNRG
RDSGPPTKKIRSSPRE	SDVELLLRTSVIQGIH	IGLQMGTNRGASQAGM
DSGPPTKKIRSSPREA	SGVERMGAGMGFGLER	SQNARHLQGGEKQRVF
SGPPTKKIRSSPREAK	TEFSDIPRRAPKKPLT	TEQPVRKNKMASNIFG
GPPTKKIRSSPREAKN	GKVTKSAQKAQKAK__	PVRKNKMASNIFGTPE
SSPREAKNKRRSGKNS	IGKTLAEKSRGLFSAN	VRKNKMASNIFGTPEE
SESTPIAETIMASSNE	AEKSRGLFSANDWQCK	TEQVNGLF________
PIAETIMASSNESLVV	AKSVKIKKNKDNVKFK	ATSGAVLQAATGMYEQ
ETIMASSNESLVVNRV	AIATIKTKRTIQFVDW	HTGRLVIGDHKSTSHF
INEELESQYQQSMDSK	GEDEGEEY________	AEGAGDAK________
QEGKNVIGLQMGTNRG	GEEEGEEY________	ETSKKWAAGQNKQHSI
IGLQMGTNRGASQAGM	KRQEQIAKRRRLSSLR	KVKKERDS________
SQNARHLQGGEKQRVF	IGEELAIHNRGKEGYI	DDGEEEDD________
TEQPVRKNKMASNIFG	EDKTFGLKNKKGAKQQ	SDSNLHDA________
PVRKNKMASNIFGTPE	EVDMESHRNANAEPAV	GEKEAKSD________
VRKNKMASNIFGTPEE	AQMAAKLERLREKDKH	KGYWASLDASTQTTHE
MTRAQRVRAAMFPETL	TEDTEAKKRKRAERFG	SQASAAARNSLYDMAR
TEQVNGLF________	YDFSTDYV________	SQIQETSI________
ATSGAVLQAATGMYEQ	VTKSAQKAQKAK____	QLYWSHPRKFGQGSRS
TKDGNVLLHEMQIQHP	TKSAQKAQKAK_____	GLAVKELK________
HTGRLVIGDHKSTSHF	GDELRTEPEAKKSKTA	TSSTRVTKHSTVQHSY
AEGAGDAK________	ADEISLRPAQSFLMNK	MVGLANLHAMGIAPPK
AAEDDEDDDVDTKKQK	EQDVEKKK________	KEEIDILSDACSKLQE
ETSKKWAAGQNKQHSI	GGAVFDHPAKIAKSTK	QKKQEILKKFMDQHPE
KVKKERDS________	AAIVDMVPGKPMCVES	GSRNMGGPYGGGNYGP
DDGEEEDD________	SEEDVSSRYSRTDRSG	DDWNGTRPSLKAPPAR
SDSNLHDA________	IHATTYIPLMDNADSS	VSKNQALKLQLDNQYA
KGYWASLDASTQTTHE	NDSSNLDPSQAPSLAQ	SRQLYVLGHEAMKRLQ
SQASAAARNSLYDMAR	GAAKEEPKRRSARLSA	AQSAGTVRSAAPPQEK
QLYWSHPRKFGQGSRS	GTPPTAANYPSSSRTP	PEKTQESL________
GLAVKELK________	LAKLNQVARQQSHFAM	NVADSPRNKKEKSS__
TSSTRVTKHSTVQHSY	LNQVARQQSHFAMMHG	DNSTISLQMGTNKVAS
MVGLANLHAMGIAPPK	NQVARQQSHFAMMHGG	GMTGYGMPRQIL____
KEEIDILSDACSKLQE	ARQQSHFAMMHGGTGF	IKAVDKKAAGAGKVTK
QKKQEILKKFMDQHPE	KSSHSQYN________	VKDGKTLNDELEIIEG
VLRTNLGPKGTMKMLV	DVLVRQGD________	QDSVDFSLADAINTEF
GSRNMGGPYGGGNYGP	ADSQPPVFKVFPGSTT	DSVDFSLADAINTEFK
DDWNGTRPSLKAPPAR	EEIKETDGSSQIKQEP	SVDFSLADAINTEFKN
VSKNQALKLQLDNQYA	SQIKQEPDPTW_____	EGPSDIPD________
SRQLYVLGHEAMKRLQ	KQEPDPTW________	LSVAEITNACFEPANQ
AQSAGTVRSAAPPQEK	LGDGPKLVRELFRVAE	GDSDLQLERINVYYNE
PEKTQESL________	SGEGLLGLSPGPNGHS	PTGTYHGDSDLQLERI
NVADSPRNKKEKSS__	KERELELKNTWSENKL	GDSDLQLDRISVYYNE
DNSTISLQMGTNKVAS	GQVINETSQHHDDLE_	NTFFSETGAGKHVPRA
GMTGYGMPRQIL____	SQHHDDLE________	HEEEIVHHKKEIERLQ
ADAVAVTMGPKGRTVI	DKGKNVRQRNSS____	PADETEAD________
IKAVDKKAAGAGKVTK	KEHYQVLE________	SCAVYTFHVFSSLFKN
VKDGKTLNDELEIIEG	KEEIERIHREVAFNKT	PKMQTDKPFDQTTISL
DSVDFSLADAINTEFK	SGGAYGSQMMGGMGLS	QGLLSQLQGQSKDMPP
SVDFSLADAINTEFKN	KLPASFDAREQWPQCP	DQASNILASFGLSARD
FSLADAINTEFKNTRT	LADAVAVTMGPKGRTV	AGTAFIQTQQLHAAMA
EGPSDIPD________	ADAVAVTMGPKGRTVI	FIQTQQLHAAMADTFL
LSVAEITNACFEPANQ	QTVVGTYHGSPDQSHQ	LVKSTLGPKGMDKILL
GDSDLQLERINVYYNE	SHQVTGNHQQPPQQNT	IEVNVELRKAKKDDQM
PTGTYHGDSDLQLERI	DKHIEEVRKNKESKDP	SDVELLLRTSVIQGIH
GDSDLQLDRISVYYNE	PVQATQNKTGKYVPPS	SGVERMGAGMGFGLER
NTFFSETGAGKHVPRA	LVATNLPGRGQLQKLA	TEFSDIPRRAPKKPLT
HEEEIVHHKKEIERLQ	ATNLPGRGQLQKLASE	GKVTKSAQKAQKAK__
PADETEAD________	KEKAEKLKQSLPPGLA	IGKTLAEKSRGLFSAN
SCAVYTFHVFSSLFKN	VEDDTTHG________	AEKSRGLFSANDWQCK
PKMQTDKPFDQTTISL	VQLTEIKPLLNDKNGT	AKSVKIKKNKDNVKFK
DQASNILASFGLSARD	LTEIKPLLNDKNGTRN	AIATIKTKRTIQFVDW
FIQTQQLHAAMADTFL	EEERAQRPRLQLKPRT	GEDEGEEY________
IEVNVELRKAKKDDQM	RAQRPRLQLKPRTVAT	GEEEGEEY________
SDVELLLRTSVIQGIH	PDIAVGTKRGSDELFS	KRQEQIAKRRRLSSLR
SGVERMGAGMGFGLER	KTGALLLQGFIQDRAG	IGEELAIHNRGKEGYI
TEFSDIPRRAPKKPLT	ESTRRILGLAIESQDA	EDKTFGLKNKKGAKQQ
SLAEDDVE________	ERRQQVLDRYHRFKEL	TEDTEAKKRKRAERFG
GKVTKSAQKAQKAK__	EAEVTRTARKQSAQKR	YDFSTDYV________
IGKTLAEKSRGLFSAN	VSNPRGRPSRGRPPKL	VTKSAQKAQKAK____
AEKSRGLFSANDWQCK	GVIEGGLNVTLTIRLL	TKSAQKAQKAK_____
AKSVKIKKNKDNVKFK	ASIANIVKSSLGPVGL	GDELRTEPEAKKSKTA
AIATIKTKRTIQFVDW	QVARTHLTEDTPKVNA	ADEISLRPAQSFLMNK
GEEEGEEY________	NEKINAEKSSKQKVDL	EQDVEKKK________
KRQEQIAKRRRLSSLR	GGASRFSASSGGGGSR	GGAVFDHPAKIAKSTK
IGEELAIHNRGKEGYI	SDSSPAVENEHPQETP	AAIVDMVPGKPMCVES
EDKTFGLKNKKGAKQQ	MFGGPGTASRPSSSRS	SEEDVSSRYSRTDRSG
TEDTEAKKRKRAERFG	FGGPGTASRPSSSRSY	IHATTYIPLMDNADSS
IKDFLLTARRKDAKSV	LVGSDQAPGRDKNIPA	SPGKVLLQSKDQITAG
KDFLLTARRKDAKSVK	KNIPAGLQSMNQALQR	NDSSNLDPSQAPSLAQ
YDFSTDYV________	SGVERMGPAIERMGLS	GAAKEEPKRRSARLSA
VTKSAQKAQKAK____	YGMPRQIL________	DTTSFDSAWGQESAQN
TKSAQKAQKAK_____	MKETIMNQEKLAKLQA	GTPPTAANYPSSSRTP
GDELRTEPEAKKSKTA	TIMNQEKLAKLQAQVR	LAKLNQVARQQSHFAM
ADEISLRPAQSFLMNK	FEEYIRVKARSVPQHR	LNQVARQQSHFAMMHG
EQDVEKKK________	LEKQNHTPRKHHQHHH	NQVARQQSHFAMMHGG
AAIVDMVPGKPMCVES	KQNHTPRKHHQHHHQQ	ARQQSHFAMMHGGTGF
SEEDVSSRYSRTDRSG	MREIVHLQAGQCGNQI	DVLVRQGD________
IHATTYIPLMDNADSS	REIVHLQAGQCGNQIG	ADSQPPVFKVFPGSTT
KTTRTPEEGGYSYDIS	SDFQSNIA________	SQIKQEPDPTW_____
NDSSNLDPSQAPSLAQ	DTSKYNVRHLMPQ___	KQEPDPTW________
GAAKEEPKRRSARLSA	ANGGLALASIEDQGAA	LGDGPKLVRELFRVAE
DTTSFDSAWGQESAQN	SELGNQSPSTSSRQVT	SGEGLLGLSPGPNGHS
GTPPTAANYPSSSRTP	SDAMKKVGRKGVITVK	KERELELKNTWSENKL
LAKLNQVARQQSHFAM	DTPTSAGPNSFNKGKH	GQVINETSQHHDDLE_
AKLNQVARQQSHFAMM	DDIDIDAI________	SQHHDDLE________
LNQVARQQSHFAMMHG	DTYGQQWK________	DKGKNVRQRNSS____
NQVARQQSHFAMMHGG	STRSLNYKSTSSGHRE	KEHYQVLE________
ARQQSHFAMMHGGTGF	AVQSGKKKKKQKMVRA	GGMGGGMF________
DVLVRQGD________	VNFTSELRKHPSSPAR	KEEIERIHREVAFNKT
EEIKETDGSSQIKQEP	AKFWEVISDEHGIDPT	SGGAYGSQMMGGMGLS
SQIKQEPDPTW_____	ISDEHGIDPTGTYHGD	VFGNKSTNVIVDSGGF
KQEPDPTW________	HGIDPTGSYHGDSDLQ	KLPASFDAREQWPQCP
LGDGPKLVRELFRVAE	HGIDPTGTYHGDSDLQ	LADAVAVTMGPKGRTV
KERELELKNTWSENKL	GGYVGDSALQLERINV	ADAVAVTMGPKGRTVI
GQVINETSQHHDDLE_	PQQVAQQQ________	QTVVGTYHGSPDQSHQ
SQHHDDLE________	SDPFEVLKAAENKKKE	SHQVTGNHQQPPQQNT
DKGKNVRQRNSS____	EVLKAAENKKKEAGGG	DKHIEEVRKNKESKDP
KEHYQVLE________	AIFGGARPREEVVQKE	PVQATQNKTGKYVPPS
GGMGGGMF________	NDAPHKNTQEKFSLSQ	LVATNLPGRGQLQKLA
KEEIERIHREVAFNKT	EGEWKALKRKKFKK__	ATNLPGRGQLQKLASE
SGGAYGSQMMGGMGLS	ESQFEMDI________	KEKAEKLKQSLPPGLA
KLPASFDAREQWPQCP	SGIESSSPEVKGYWGL	VEDDTTHG________
QTVVGTYHGSPDQSHQ	KGYWGLDASAQTTSHE	LTEIKPLLNDKNGTRN
SHQVTGNHQQPPQQNT	LLQDDISSSYTTTTTI	EEERAQRPRLQLKPRT
DKHIEEVRKNKESKDP	QDDISSSYTTTTTITA	PDIAVGTKRGSDELFS
YNARMDTS________	ISSSYTTTTTITAPPS	KTGALLLQGFIQDRAG
PVQATQNKTGKYVPPS	SSYTTTTTITAPPSRV	ESTRRILGLAIESQDA
LVATNLPGRGQLQKLA	SYTTTTTITAPPSRVL	ERRQQVLDRYHRFKEL
ATNLPGRGQLQKLASE	YTTTTTITAPPSRVLQ	EAEVTRTARKQSAQKR
KEKAEKLKQSLPPGLA	GDKLETMPLYLEDDIR	VSNPRGRPSRGRPPKL
VEDDTTHG________	KLETMPLYLEDDIRPD	SNPRGRPSRGRPPKLQ
VQLTEIKPLLNDKNGT	QLQRRGFFICDQPYEP	GVIEGGLNVTLTIRLL
LTEIKPLLNDKNGTRN	PDVHIMQHHVLPIQAR	ASIANIVKSSLGPVGL
EEERAQRPRLQLKPRT	AGAAGGRGKGAYQDRD	QVARTHLTEDTPKVNA
RAQRPRLQLKPRTVAT	AAGGRGKGAYQDRDKP	NEKINAEKSSKQKVDL
PDIAVGTKRGSDELFS	DSEPFSNPLAPDGHDV	GGASRFSASSGGGGSR
KTGALLLQGFIQDRAG	MPEQTGEK________	AGNSEFLGKTPGQNAQ
ESTRRILGLAIESQDA	EVIEKPQA________	SDSSPAVENEHPQETP
ERRQQVLDRYHRFKEL	EEIKDFLLTARRKDAK	MFGGPGTASRPSSSRS
EAEVTRTARKQSAQKR	IKDFLLTARRKDAKSV	FGGPGTASRPSSSRSY
VSNPRGRPSRGRPPKL	KDFLLTARRKDAKSVK	LVGSDQAPGRDKNIPA
SNPRGRPSRGRPPKLQ	PEPEPVKEEKLSPEPI	KNIPAGLQSMNQALQR
ASIANIVKSSLGPVGL	VLTSGTGSQAQPQPAA	SGVERMGPAIERMGLS
QVARTHLTEDTPKVNA	GTGSQAQPQPAANQAL	YGMPRQIL________
NEKINAEKSSKQKVDL	GVTGLSQY________	MKETIMNQEKLAKLQA
GGASRFSASSGGGGSR	LNDDDFEPYLSPQARP	TIMNQEKLAKLQAQVR
SDSSPAVENEHPQETP	DFEPYLSPQARPNNAY	FEEYIRVKARSVPQHR
MFGGPGTASRPSSSRS	FEPYLSPQARPNNAYT	LEKQNHTPRKHHQHHH
FGGPGTASRPSSSRSY	QARPNNAYTAMSDSYL	KQNHTPRKHHQHHHQQ
LVGSDQAPGRDKNIPA	STSSHNLQSIFNIGSR	MREIVHLQAGQCGNQI
KNIPAGLQSMNQALQR	KSNIDKKFSAHYDAVE	REIVHLQAGQCGNQIG
SGVERMGPAIERMGLS	DADAFHHQVHDDDLLS	SDFQSNIA________
YGMPRQIL________	DKKAAGAGKVTKSAQK	STSSHNLQSIFNIGSR
MKETIMNQEKLAKLQA	KIKSVGGACVLVA___	DTSKYNVRHLMPQ___
TIMNQEKLAKLQAQVR	SPPQTKDQ________	ANGGLALASIEDQGAA
GLELTELQNMTVPEDD	ELDDRADALQAGASQF	SELGNQSPSTSSRQVT
FEEYIRVKARSVPQHR	DDRADALQAGASQFET	PGSNLRTT________
LEKQNHTPRKHHQHHH	DDLEAVAKFLDSTGSR	SDAMKKVGRKGVITVK
KQNHTPRKHHQHHHQQ	EHSSDPYHSGYEMPYA	DTPTSAGPNSFNKGKH
MREIVHLQAGQCGNQI	ENDNGTVRCEMPELVQ	DDIDIDAI________
REIVHLQAGQCGNQIG	EDGEPQQKRAHTEEPQ	DTYGQQWK________
SDFQSNIA________	LEAAKRLNAKEIVLKA	STRSLNYKSTSSGHRE
DTSKYNVRHLMPQ___	TTEDTEAKKRKRAERF	AVQSGKKKKKQKMVRA
KKDSSQLGTDATKEKP	EDTEAKKRKRAERFGI	VNFTSELRKHPSSPAR
ANGGLALASIEDQGAA	EEAAGASPAKANGQEN	ISDEHGIDPTGTYHGD
SELGNQSPSTSSRQVT	EAAGASPAKANGQENG	HGIDPTGSYHGDSDLQ
PGSNLRTT________	GASPAKANGQENGHVK	HGIDPTGTYHGDSDLQ
SDAMKKVGRKGVITVK	ASPAKANGQENGHVKS	PQQVAQQQ________
DTPTSAGPNSFNKGKH	AKANGQENGHVKSNGD	SDPFEVLKAAENKKKE
DDIDIDAI________	KANGQENGHVKSNGDL	EVLKAAENKKKEAGGG
SSVCNILNDYGSQDSI	QLLSGFPRRAFSEADM	AIFGGARPREEVVQKE
DAQFEMDI________	SISVQVNSIKFDSE__	NDAPHKNTQEKFSLSQ
DTYGQQWK________	EDDEKLKKRKERFGIV	EGEWKALKRKKFKK__
STRSLNYKSTSSGHRE	DDAYLNSPWADNTALK	ESQFEMDI________
AVQSGKKKKKQKMVRA	WADNTALKRHFHGVKD	SGIESSSPEVKGYWGL
VNFTSELRKHPSSPAR	EEPLGSGPSVLGTGTG	KGYWGLDASAQTTSHE
AKFWEVISDEHGIDPT	GSGGFHLAQQASASGS	NSSTENEA________
ISDEHGIDPTGTYHGD	EDSKLKGGKAPRVATS	SDQTKEKE________
HGIDPTGSYHGDSDLQ	NAIEAVDEFAFLEGTL	LLQDDISSSYTTTTTI
HGIDPTGTYHGDSDLQ	EEEIEVDSRVADNSFD	QDDISSSYTTTTTITA
GGYVGDSALQLERINV	TPNSTPPRRVQTPLLR	ISSSYTTTTTITAPPS
PQQVAQQQ________	EDTVTNGS________	SSYTTTTTITAPPSRV
SDPFEVLKAAENKKKE	TDEFEELEFLSTINVG	SYTTTTTITAPPSRVL
EVLKAAENKKKEAGGG	DDSLIGGNASAEGPEG	YTTTTTITAPPSRVLQ
AIFGGARPREEVVQKE	DGWTTVRR________	QNGGDKLETMPLYLED
NDAPHKNTQEKFSLSQ	SESTPIAETIMASSNE	GDKLETMPLYLEDDIR
EGEWKALKRKKFKK__	EEEKNFKAFASLRMAR	KLETMPLYLEDDIRPD
GEWKALKRKKFKK___	ITVVKGIRLSENVIDR	SGADINSICQESGMLA
ESQFEMDI________	PPAKKLNFDQA_____	PDVHIMQHHVLPIQAR
SGIESSSPEVKGYWGL	TSSTQSLARLGSPDYG	AGAAGGRGKGAYQDRD
KGYWGLDASAQTTSHE	QRPKGQGNKVQNGSVH	AAGGRGKGAYQDRDKP
NSSTENEA________	RPKGQGNKVQNGSVHQ	NEDFRKLLMTPRAAPT
SDQTKEKE________	KGQGNKVQNGSVHQKD	ALSDILINFKFHDFET
LLQDDISSSYTTTTTI	GQGNKVQNGSVHQKDG	MPEQTGEK________
QDDISSSYTTTTTITA	GNKVQNGSVHQKDGLN	EVIEKPQA________
DISSSYTTTTTITAPP	VFQTTDTKSKRK____	VPRASVPDGFLSELTQ
ISSSYTTTTTITAPPS	QTTDTKSKRK______	EEIKDFLLTARRKDAK
SSYTTTTTITAPPSRV	KVQNGSLHQKDTVHDN	IKDFLLTARRKDAKSV
SYTTTTTITAPPSRVL	NLADPRTPTAPAVNLA	KDFLLTARRKDAKSVK
YTTTTTITAPPSRVLQ	QGYAQTTQAYGQQSYG	PEPEPVKEEKLSPEPI
QNGGDKLETMPLYLED	TSSEITTKDLKEKKEV	VLTSGTGSQAQPQPAA
GDKLETMPLYLEDDIR	EITTKDLKEKKEVVEE	GTGSQAQPQPAANQAL
KLETMPLYLEDDIRPD	EKKEVVEEAENGRDAP	QALAAGTHSSPVPGSI
SGADINSICQESGMLA	KEVVEEAENGRDAPAN	LIDTHLLQARANLTQA
PDVHIMQHHVLPIQAR	EVVEEAENGRDAPANG	GVTGLSQY________
AGAAGGRGKGAYQDRD	EEAENGRDAPANGNAE	LNDDDFEPYLSPQARP
AAGGRGKGAYQDRDKP	NGRDAPANGNAENEEN	DFEPYLSPQARPNNAY
DSEPFSNPLAPDGHDV	RDAPANGNAENEENGE	FEPYLSPQARPNNAYT
NEDFRKLLMTPRAAPT	EHSPAKTSAVSNTKPG	PQARPNNAYTAMSDSY
MPEQTGEK________	HSPAKTSAVSNTKPGQ	QARPNNAYTAMSDSYL
EVIEKPQA________	PAKTSAVSNTKPGQPP	KSNIDKKFSAHYDAVE
VPRASVPDGFLSELTQ	AKTSAVSNTKPGQPPQ	DADAFHHQVHDDDLLS
EEIKDFLLTARRKDAK	KTQIVSNT________	DKKAAGAGKVTKSAQK
VLTSGTGSQAQPQPAA	EAATGEDASSPPPKTE	LTASQEAL________
GTGSQAQPQPAANQAL	ERQLNENKQERDKENR	KIKSVGGACVLVA___
LIDTHLLQARANLTQA	DAGAGIALNDHFVKLI	SPPQTKDQ________
GVTGLSQY________	GDDSFNTFFSETGAGK	SGAPGEEQRRWEEARL
QGLLSQLQGQSKDMPP	VGGNNGGNGNGGGAFS	DEVRTGTYRQLFHPEQ
DFEPYLSPQARPNNAY	SGTQDIQPGPLFNNNA	ELDDRADALQAGASQF
FEPYLSPQARPNNAYT	AMVAATQGAAAAAGSG	DDRADALQAGASQFET
PQARPNNAYTAMSDSY	GIRDHESL________	DDLEAVAKFLDSTGSR
QARPNNAYTAMSDSYL	PAEKAPVKKKAAKKAG	EHSSDPYHSGYEMPYA
STSSHNLQSIFNIGSR	AEKAPVKKKAAKKAGG	ENDNGTVRCEMPELVQ
KSNIDKKFSAHYDAVE	APVKKKAAKKAGGTPR	EDGEPQQKRAHTEEPQ
DADAFHHQVHDDDLLS	KKAAKKAGGTPRKASG	TTEDTEAKKRKRAERF
DKKAAGAGKVTKSAQK	PAEKTPVKKKARKSAG	EDTEAKKRKRAERFGI
LTASQEAL________	AEKTPVKKKARKSAGA	EEAAGASPAKANGQEN
KIKSVGGACVLVA___	KTPVKKKARKSAGAAK	EAAGASPAKANGQENG
SPPQTKDQ________	QQYQDATAEEEGEFEE	GASPAKANGQENGHVK
SGAPGEEQRRWEEARL	LLHNNGHNGYPNGTSA	ASPAKANGQENGHVKS
ELDDRADALQAGASQF	IEADFRLNDSHKHKDK	AKANGQENGHVKSNGD
DDRADALQAGASQFET	ESTFRQNPRIVNHWAS	KANGQENGHVKSNGDL
DDLEAVAKFLDSTGSR	SHTDIKVPDFSEYRRL	QLLSGFPRRAFSEADM
EHSSDPYHSGYEMPYA	KVPDFSEYRRLEVLDS	SISVQVNSIKFDSE__
SQIQETSI________	LEVLDSTKSSRESSEA	PVISESTPIAETIMAS
ENDNGTVRCEMPELVQ	VENALGLDQQFAGLDL	EDDEKLKKRKERFGIV
EDGEPQQKRAHTEEPQ	QFAGLDLNSSDNQSGG	DDAYLNSPWADNTALK
LEAAKRLNAKEIVLKA	EGPGKNLPFSVENKWS	WADNTALKRHFHGVKD
TTEDTEAKKRKRAERF	KEGFEKISKGANPVEI	GSGGFHLAQQASASGS
EDTEAKKRKRAERFGI	SIASVLLQTREMGEAK	EDSKLKGGKAPRVATS
EEAAGASPAKANGQEN	DKYKNIGAKLVQDVAN	QVTTLVNTNSKGPSNK
EAAGASPAKANGQENG	KYKNIGAKLVQDVANN	NAIEAVDEFAFLEGTL
GASPAKANGQENGHVK	QNDPLKDSYGMSPCNT	EEEIEVDSRVADNSFD
ASPAKANGQENGHVKS	INISGNGF________	TPNSTPPRRVQTPLLR
AKANGQENGHVKSNGD	PGSNLRTT________	FTGFGKKARTFDLEAM
KANGQENGHVKSNGDL	SEDDEKLKKRKERFGI	EDTVTNGS________
QLLSGFPRRAFSEADM	VHSGALND________	TDEFEELEFLSTINVG
SISVQVNSIKFDSE__	ELDAQLDAYNARMDTS	DDSLIGGNASAEGPEG
PVISESTPIAETIMAS	AQLDAYNARMDTS___	DGWTTVRR________
DDAYLNSPWADNTALK	YNARMDTS________	TKDGVTVAKSIDLKDK
WADNTALKRHFHGVKD	SRDSQGHGRDLSAAGI	EEEKNFKAFASLRMAR
EEPLGSGPSVLGTGTG	GHGRDLSAAGIGLLAA	ITVVKGIRLSENVIDR
GSGGFHLAQQASASGS	AAATQSLSMPASLGRM	PSVVDRVASMPLISST
EDSKLKGGKAPRVATS	PLSDPAPF________	TPPAKKLNFDQA____
QVTTLVNTNSKGPSNK	NEGEDYAE________	PPAKKLNFDQA_____
NAIEAVDEFAFLEGTL	EEEEEHPSKTSTKKLK	VAIKAMAK________
EEEIEVDSRVADNSFD	KVDKVIQAQTAFSANP	TSSTQSLARLGSPDYG
TPNSTPPRRVQTPLLR	VIQAQTAFSANPANPA	SSLLEQRPKGQGNKVQ
FTGFGKKARTFDLEAM	SLGSALRPSTSRSLYA	QRPKGQGNKVQNGSVH
EDTVTNGS________	GDKKPDAK________	RPKGQGNKVQNGSVHQ
TDEFEELEFLSTINVG	NLEDYKKRRGLI____	KGQGNKVQNGSVHQKD
DDSLIGGNASAEGPEG	KTEGWSKNFKLLQSQL	GQGNKVQNGSVHQKDG
DGWTTVRR________	SKNFKLLQSQLQVKKA	GNKVQNGSVHQKDGLN
TKDGVTVAKSIDLKDK	VKKAALTQAKSQRTKQ	VFQTTDTKSKRK____
EEEKNFKAFASLRMAR	SLNAEALQYLQGYLQA	QTTDTKSKRK______
ITVVKGIRLSENVIDR	QIVAPKGS________	KVQNGSLHQKDTVHDN
TPPAKKLNFDQA____	TARVITNQYNNPAGLY	NLADPRTPTAPAVNLA
PPAKKLNFDQA_____	IDITDFQAKREKVDSQ	QGYAQTTQAYGQQSYG
VAIKAMAK________	ALTRESTRGSRRTPRK	SSEITTKDLKEKKEVV
TSSTQSLARLGSPDYG	EIDDSVLGQTGPYRRP	EITTKDLKEKKEVVEE
SSLLEQRPKGQGNKVQ	WESPKQIKKKKKARRE	EKKEVVEEAENGRDAP
EQRPKGQGNKVQNGSV	ESPKQIKKKKKARRET	KEVVEEAENGRDAPAN
QRPKGQGNKVQNGSVH	QQTLSHLSQQHHHLPQ	EEAENGRDAPANGNAE
RPKGQGNKVQNGSVHQ	FLDSGRKTRSARRRTT	NGRDAPANGNAENEEN
KGQGNKVQNGSVHQKD	SGRKTRSARRRTTQII	GRDAPANGNAENEENG
GQGNKVQNGSVHQKDG	ETNLDSLPLVDTHSKR	RDAPANGNAENEENGE
GNKVQNGSVHQKDGLN	DSLPLVDTHSKRTLLI	EHSPAKTSAVSNTKPG
VFQTTDTKSKRK____	HQELAKAQSGLAFQQT	HSPAKTSAVSNTKPGQ
QTTDTKSKRK______	KLAGGQVE________	PAKTSAVSNTKPGQPP
NLADPRTPTAPAVNLA	TAVFGTVSATPSSSLP	AKTSAVSNTKPGQPPQ
TSSEITTKDLKEKKEV	DDLKKRLERIKSSRK_	KTQIVSNT________
SSEITTKDLKEKKEVV	AGIALNDHFVKLISWY	EAATGEDASSPPPKTE
EITTKDLKEKKEVVEE	QESFAEHRSGLVPQQI	ERQLNENKQERDKENR
EKKEVVEEAENGRDAP	SFAEHRSGLVPQQIKV	DAGAGIALNDHFVKLI
KEVVEEAENGRDAPAN	EDIKAKMQASIEKGGS	AGIALNDHFVKLISWY
EVVEEAENGRDAPANG	RLLQDSVDFSLADAIN	HFVKLISWYDNEFGYS
EEAENGRDAPANGNAE	SSYQIPTENSMTARNT	GDDSFNTFFSETGAGK
NGRDAPANGNAENEEN	IMGLSSQNGQLRGPVK	EKGVGGNNGGNGNGGG
GRDAPANGNAENEENG	MGLSSQNGQLRGPVKP	VGGNNGGNGNGGGAFS
RDAPANGNAENEENGE	TISEVALQSGRGTVSL	SGTQDIQPGPLFNNNA
EHSPAKTSAVSNTKPG	PEPSGGGPSAEAAPDT	AMVAATQGAAAAAGSG
HSPAKTSAVSNTKPGQ	PKKEDALLYQSKGYND	PAEKAPVKKKAAKKAG
PAKTSAVSNTKPGQPP	KSDSPSTSSIPPLNET	AEKAPVKKKAAKKAGG
AKTSAVSNTKPGQPPQ	TKKLEDVKNSPTFKSF	APVKKKAAKKAGGTPR
KTQIVSNT________	DWNGTRPSLKAPPARP	KKAAKKAGGTPRKASG
EAATGEDASSPPPKTE	SGSSKGGPLQALTRES	PAEKTPVKKKARKSAG
AATGEDASSPPPKTEA	SSKGGPLQALTRESTR	AEKTPVKKKARKSAGA
ERQLNENKQERDKENR	SKGGPLQALTRESTRG	KTPVKKKARKSAGAAK
PSVTQVTRNVPPGLDE	GGPLQALTRESTRGSR	QQYQDATAEEEGEFEE
DAGAGIALNDHFVKLI	AAAPAKVEAKEESEES	LLHNNGHNGYPNGTSA
AGIALNDHFVKLISWY	LEELVVQPLLVSVSAL	IEADFRLNDSHKHKDK
GDDSFNTFFSETGAGK	LDAAGVASLLTTAEVV	QKFIGEGARMVRELFV
SGTQDIQPGPLFNNNA	TTISSQKI________	ESTFRQNPRIVNHWAS
AMVAATQGAAAAAGSG	PEKTQESL________	SHTDIKVPDFSEYRRL
PAEKAPVKKKAAKKAG	KIDDVVNTR_______	KVPDFSEYRRLEVLDS
AEKAPVKKKAAKKAGG	LSEAEAQALLSGDTQT	LEVLDSTKSSRESSEA
APVKKKAAKKAGGTPR	EAEAQALLSGDTQTDA	VENALGLDQQFAGLDL
KKAAKKAGGTPRKASG	VEGSLIVEKIMQSSSE	QFAGLDLNSSDNQSGG
PAEKTPVKKKARKSAG	QEKRSEIS________	KEGFEKISKGANPVEI
AEKTPVKKKARKSAGA	TKAKSKKN________	SIASVLLQTREMGEAK
KTPVKKKARKSAGAAK	VVSVVTPGCNQLPTLE	KYKNIGAKLVQDVANN
QQYQDATAEEEGEFEE	KEVVIVSATRTPIGSF	QNDPLKDSYGMSPCNT
LLHNNGHNGYPNGTSA	IVSATRTPIGSFLGSL	INISGNGF________
IEADFRLNDSHKHKDK	KETIEQEKRSEIS___	SEDDEKLKKRKERFGI
QKFIGEGARMVRELFV	IEQEKRSEIS______	VHSGALND________
ESTFRQNPRIVNHWAS	TETSYVTGSTMPPTTV	ELDAQLDAYNARMDTS
SHTDIKVPDFSEYRRL	KIDDIRKPGESEE___	AQLDAYNARMDTS___
KVPDFSEYRRLEVLDS	PQPQSLLQAQISAASI	YNARMDTS________
LEVLDSTKSSRESSEA	KQNAEELQDFMRDLEN	SRDSQGHGRDLSAAGI
VENALGLDQQFAGLDL	NVTIRKGPHEKELLQS	GHGRDLSAAGIGLLAA
QFAGLDLNSSDNQSGG	FGSNRNSPKHTRLRTS	LLAAATQSLSMPASLG
KEGFEKISKGANPVEI	VAESEFTH________	AAATQSLSMPASLGRM
SIASVLLQTREMGEAK	GGMGGGMF________	VTVEGPNNNNPQTSAV
KYKNIGAKLVQDVANN	KKDSSQLGTDATKEKP	VRTPTQTNGSNVPFKP
QNDPLKDSYGMSPCNT	GISETRIEKRIVITGD	PLSDPAPF________
INISGNGF________	GVDPNSRNSSRVLRPP	NEGEDYAE________
SEDDEKLKKRKERFGI	DPNSRNSSRVLRPPGG	EEEEEHPSKTSTKKLK
EDDEKLKKRKERFGIV	EKNYTKAMRLFVGEPV	KVDKVIQAQTAFSANP
VHSGALND________	EVSKSDLGRKIKEGVE	VIQAQTAFSANPANPA
ELDAQLDAYNARMDTS	ITPPVVLRLKCGSGPV	SLGSALRPSTSRSLYA
AQLDAYNARMDTS___	KAVDKKAAGAGKVTKS	GDKKPDAK________
SRDSQGHGRDLSAAGI	AAGAGKVTKSAQKAQK	NLEDYKKRRGLI____
GHGRDLSAAGIGLLAA	AGKVTKSAQKAQKAK_	KTEGWSKNFKLLQSQL
LLAAATQSLSMPASLG	ADKPVSSQLRVLTLSE	SKNFKLLQSQLQVKKA
AAATQSLSMPASLGRM	VDKKAAGAGKVTKSAQ	LQSQLQVKKAALTQAK
QSLSMPASLGRMNQGT	AEKAYHEQLSVAEITN	VKKAALTQAKSQRTKQ
VTVEGPNNNNPQTSAV	KDGKTLNDELEIIEGM	SLNAEALQYLQGYLQA
VRTPTQTNGSNVPFKP	QVIKESDASKIPGKKV	QIVAPKGS________
PLSDPAPF________	ETLKQQNQYQASYNQS	TARVITNQYNNPAGLY
NEGEDYAE________	LEDEVRNLRKINRDLF	IDITDFQAKREKVDSQ
EEEEEHPSKTSTKKLK	SEDLVIRLRRPPLRYP	ALTRESTRGSRRTPRK
KVDKVIQAQTAFSANP	KDDVYEAFMKEMEGLL	EIDDSVLGQTGPYRRP
VIQAQTAFSANPANPA	PKEEESPV________	WESPKQIKKKKKARRE
SLGSALRPSTSRSLYA	DAAGVASLLTTAEVVV	ESPKQIKKKKKARRET
GDKKPDAK________	LGNEERKQKFLRLMGA	ITDKEKAEKLKQSLPP
NLEDYKKRRGLI____	GNEERKQKFLRLMGAG	ENKLLGKNGTGGLFQG
KTEGWSKNFKLLQSQL	NRVVDLMAHMASKE__	FLDSGRKTRSARRRTT
TEGWSKNFKLLQSQLQ	LIDTHLLQARANLTQA	SGRKTRSARRRTTQII
SKNFKLLQSQLQVKKA	ASSEELARQRGVLERT	ETNLDSLPLVDTHSKR
VKKAALTQAKSQRTKQ	YGGGGQYFAKPRNQGG	DSLPLVDTHSKRTLLI
SLNAEALQYLQGYLQA	AQAHSQEQ________	HQELAKAQSGLAFQQT
QIVAPKGS________	EDEKRYNERISGLGLT	KAQSGLAFQQTSNTQP
TARVITNQYNNPAGLY	YPDEYHGEYQDDYPRD	KLAGGQVE________
IDITDFQAKREKVDSQ	PPPPPSRK________	TAVFGTVSATPSSSLP
SSKGGPLQALTRESTR	APDDVDFF________	DDLKKRLERIKSSRK_
ALTRESTRGSRRTPRK	NA	QESFAEHRSGLVPQQI
EIDDSVLGQTGPYRRP	NA	SFAEHRSGLVPQQIKV
WESPKQIKKKKKARRE	NA	EDIKAKMQASIEKGGS
ESPKQIKKKKKARRET	NA	RLLQDSVDFSLADAIN
ITDKEKAEKLKQSLPP	NA	FSLADAINTEFKNTRT
QQTLSHLSQQHHHLPQ	NA	SSYQIPTENSMTARNT
ANSRPLDHAQPPSSLV	NA	IMGLSSQNGQLRGPVK
ENKLLGKNGTGGLFQG	NA	MGLSSQNGQLRGPVKP
FLDSGRKTRSARRRTT	NA	GSKLIRKAKEAPFVPV
SGRKTRSARRRTTQII	NA	TISEVALQSGRGTVSL
ETNLDSLPLVDTHSKR	NA	PEPSGGGPSAEAAPDT
DSLPLVDTHSKRTLLI	NA	PKKEDALLYQSKGYND
HQELAKAQSGLAFQQT	NA	FVQENPLSQKKPTVTL
KAQSGLAFQQTSNTQP	NA	KSDSPSTSSIPPLNET
KLAGGQVE________	NA	TKKLEDVKNSPTFKSF
TAVFGTVSATPSSSLP	NA	DWNGTRPSLKAPPARP
QESFAEHRSGLVPQQI	NA	SSKGGPLQALTRESTR
SFAEHRSGLVPQQIKV	NA	GGPLQALTRESTRGSR
EDIKAKMQASIEKGGS	NA	AAAPAKVEAKEESEES
RLLQDSVDFSLADAIN	NA	LEELVVQPLLVSVSAL
SSYQIPTENSMTARNT	NA	TTISSQKI________
IMGLSSQNGQLRGPVK	NA	KIDDVVNTR_______
MGLSSQNGQLRGPVKP	NA	LSEAEAQALLSGDTQT
GSKLIRKAKEAPFVPV	NA	VEGSLIVEKIMQSSSE
TISEVALQSGRGTVSL	NA	SLIVEKIMQSSSEVGY
PEPSGGGPSAEAAPDT	NA	QEKRSEIS________
KSDSPSTSSIPPLNET	NA	TKAKSKKN________
TKKLEDVKNSPTFKSF	NA	VVSVVTPGCNQLPTLE
ATLSVHQLVENTDETY	NA	KEVVIVSATRTPIGSF
YKKAVAMSKRYGSDRR	NA	IVSATRTPIGSFLGSL
DWNGTRPSLKAPPARP	NA	KETIEQEKRSEIS___
SGSSKGGPLQALTRES	NA	IEQEKRSEIS______
GGPLQALTRESTRGSR	NA	TETSYVTGSTMPPTTV
AAAPAKVEAKEESEES	NA	KIDDIRKPGESEE___
LEELVVQPLLVSVSAL	NA	RKPGESEE________
TTISSQKI________	NA	AEVVQGQSRTPRISPP
KIDDVVNTR_______	NA	KQNAEELQDFMRDLEN
LSEAEAQALLSGDTQT	NA	NVTIRKGPHEKELLQS
EAEAQALLSGDTQTDA	NA	FGSNRNSPKHTRLRTS
VEGSLIVEKIMQSSSE	NA	VAESEFTH________
SLIVEKIMQSSSEVGY	NA	KKDSSQLGTDATKEKP
QEKRSEIS________	NA	GISETRIEKRIVITGD
TKAKSKKN________	NA	GVDPNSRNSSRVLRPP
VVSVVTPGCNQLPTLE	NA	DPNSRNSSRVLRPPGG
KEVVIVSATRTPIGSF	NA	EKNYTKAMRLFVGEPV
IVSATRTPIGSFLGSL	NA	EVSKSDLGRKIKEGVE
KETIEQEKRSEIS___	NA	ITPPVVLRLKCGSGPV
IEQEKRSEIS______	NA	KAVDKKAAGAGKVTKS
TETSYVTGSTMPPTTV	NA	AAGAGKVTKSAQKAQK
KIDDIRKPGESEE___	NA	AVDKKAAGAGKVTKSA
RKPGESEE________	NA	AGKVTKSAQKAQKAK_
PQPQSLLQAQISAASI	NA	ADKPVSSQLRVLTLSE
AEVVQGQSRTPRISPP	NA	VDKKAAGAGKVTKSAQ
KQNAEELQDFMRDLEN	NA	AEKAYHEQLSVAEITN
NVTIRKGPHEKELLQS	NA	KDGKTLNDELEIIEGM
FGSNRNSPKHTRLRTS	NA	QVIKESDASKIPGKKV
VAESEFTH________	NA	ETLKQQNQYQASYNQS
GISETRIEKRIVITGD	NA	LEDEVRNLRKINRDLF
GVDPNSRNSSRVLRPP	NA	SEDLVIRLRRPPLRYP
DPNSRNSSRVLRPPGG	NA	KDDVYEAFMKEMEGLL
EKNYTKAMRLFVGEPV	NA	PKEEESPV________
EVSKSDLGRKIKEGVE	NA	LGNEERKQKFLRLMGA
ITPPVVLRLKCGSGPV	NA	GNEERKQKFLRLMGAG
KAVDKKAAGAGKVTKS	NA	ASSEELARQRGVLERT
AAGAGKVTKSAQKAQK	NA	YGGGGQYFAKPRNQGG
AVDKKAAGAGKVTKSA	NA	AQAHSQEQ________
AGKVTKSAQKAQKAK_	NA	EDEKRYNERISGLGLT
ADKPVSSQLRVLTLSE	NA	YPDEYHGEYQDDYPRD
VDKKAAGAGKVTKSAQ	NA	PPPPPSRK________
AEKAYHEQLSVAEITN	NA	APDDVDFF________
KDGKTLNDELEIIEGM	NA	NA
ELGGLLKPTVASQNQN	NA	NA
QVIKESDASKIPGKKV	NA	NA
ETLKQQNQYQASYNQS	NA	NA
LEDEVRNLRKINRDLF	NA	NA
SEDLVIRLRRPPLRYP	NA	NA
KDDVYEAFMKEMEGLL	NA	NA
PKEEESPV________	NA	NA
LGNEERKQKFLRLMGA	NA	NA
GNEERKQKFLRLMGAG	NA	NA
NRVVDLMAHMASKE__	NA	NA
ASSEELARQRGVLERT	NA	NA
YGGGGQYFAKPRNQGG	NA	NA
AQAHSQEQ________	NA	NA
EDEKRYNERISGLGLT	NA	NA
YPDEYHGEYQDDYPRD	NA	NA
PPPPPSRK________	NA	NA
APDDVDFF________	NA	NA

## Sheet: MPro_4hrs
Rep_1	Rep_2	Rep_3
KRRALAAPAAEEKEEA	DTTAAPAAAAAPAKVE	DTTAAPAAAAAPAKVE
KAEVARAQAALAVNIS	KRRALAAPAAEEKEEA	KRRALAAPAAEEKEEA
SPSPSQLQAAQIQVQH	REEFPTLQAAGDQDKA	REEFPTLQAAGDQDKA
QIQVQHVQAAQQIQAA	AAAQTNSNAAGKQLRK	AAAQTNSNAAGKQLRK
LEEHAKLQAAVDGPMD	KSLKFATEAAITILRI	KSLKFATEAAITILRI
LGSSNWEAADLGNEER	KAEVARAQAALAVNIS	KAEVARAQAALAVNIS
RDFIATLEAEAFDDVV	RAQSREQLAALKKHHE	RAQSREQLAALKKHHE
CLFPRVFAAEAVTADS	SPSPSQLQAAQIQVQH	SPSPSQLQAAQIQVQH
QETLVKIQAEHSESGQ	QIQVQHVQAAQQIQAA	QIQVQHVQAAQQIQAA
MESHRNANAEPAVQRT	GSGAKPSDAASEAARP	GSGAKPSDAASEAARP
HASIQMNVAEVDKVTG	LEEHAKLQAAVDGPMD	LEEHAKLQAAVDGPMD
LLDGKNVNAGGHKLGL	EVAAEEPNAAVPDEIP	EVAAEEPNAAVPDEIP
LVDGKSINAGGHKVGL	MLQGVDLLADAVAVTM	MLQGVDLLADAVAVTM
EHNQSYSQAGITETEW	LGSSNWEAADLGNEER	LGSSNWEAADLGNEER
SVSSQYNMAGVRTEDS	RDFIATLEAEAFDDVV	RDFIATLEAEAFDDVV
TSSKRALGAHLEAEPK	CLFPRVFAAEAVTADS	CLFPRVFAAEAVTADS
SVDFSLADAINTEFKN	QETLVKIQAEHSESGQ	QETLVKIQAEHSESGQ
AYTIQGQYAIPQPDLT	ATYAPVISAEKAYHEQ	ATYAPVISAEKAYHEQ
SDDSILRLAKADGIVS	MESHRNANAEPAVQRT	MESHRNANAEPAVQRT
APHLTRAYAKDVKFGA	HASIQMNVAEVDKVTG	HASIQMNVAEVDKVTG
AAAPAKVEAKEESEES	GVASLLTTAEVVVTEI	GVASLLTTAEVVVTEI
KDKYKNIGAKLVQDVA	IKAVDKKAAGAGKVTK	IKAVDKKAAGAGKVTK
VTKDGVTVAKSIDLKD	LLKHYRGPAGDATVAS	LLKHYRGPAGDATVAS
SSIQSIVPALEIANAH	LLDGKNVNAGGHKLGL	LLDGKNVNAGGHKLGL
QKADVTLSALNDSDAN	LVDGKSINAGGHKVGL	LVDGKSINAGGHKVGL
EKVAEKLEALSVKEET	EHNQSYSQAGITETEW	EHNQSYSQAGITETEW
MDHHFRKPANDITSQL	SYFTSGLQAGLKQSHL	SYFTSGLQAGLKQSHL
GARGGPAKANSNPFEV	SVSSQYNMAGVRTEDS	SVSSQYNMAGVRTEDS
PYEYPYTLAPATSILE	DEAVAVLQAHHAKKEA	DEAVAVLQAHHAKKEA
GFGLERMAAPIDRVGQ	TSSKRALGAHLEAEPK	TSSKRALGAHLEAEPK
SEAAPEAGAPTSASGL	DEAVAVLQAHQAKEAA	DEAVAVLQAHQAKEAA
TTYTSQNNAQGPLYEQ	ISSNPELAAIFESIQK	SVDFSLADAINTEFKN
QEMIARMQAQMQMQMQ	AYTIQGQYAIPQPDLT	AYTIQGQYAIPQPDLT
SLLGFSVNASSERLNM	NLASARTPAIPTAVNL	SDDSILRLAKADGIVS
ELQMTRQMASSGASGG	SDDSILRLAKADGIVS	APHLTRAYAKDVKFGA
PSTSRSLYASSPGGVY	APHLTRAYAKDVKFGA	AAAPAKVEAKEESEES
SVGKMIGQATAADQEK	AAAPAKVEAKEESEES	KRREERLQAKKEEIIK
SEYQQYQDATAEEEED	KRREERLQAKKEEIIK	KDKYKNIGAKLVQDVA
SEYQQYQDATAEEEGE	KDKYKNIGAKLVQDVA	AKAVKPKAAKPKTAKP
VSVSALTLATETVRSI	VTKDGVTVAKSIDLKD	VTKDGVTVAKSIDLKD
KASKTAENATSGETLE	KKAFTELQAKVIDTQQ	KKAFTELQAKVIDTQQ
TVAVGVIKAVDKKAAG	SSIQSIVPALEIANAH	SSIQSIVPALEIANAH
GAGKHVPRAVFVDLEP	AQSREQLAALKKHHEE	AQSREQLAALKKHHEE
ELGEYGLQAYTEVKTV	QKADVTLSALNDSDAN	QKADVTLSALNDSDAN
PEIDITCWDADPVPEE	EKVAEKLEALSVKEET	EKVAEKLEALSVKEET
AKDVKFGADARALMLQ	SSGVQPTLAMPNIAVG	SSGVQPTLAMPNIAVG
KTEMVTISDASQRTEI	MDHHFRKPANDITSQL	GARGGPAKANSNPFEV
WHSSRPVRDDSVVEKS	GARGGPAKANSNPFEV	PYEYPYTLAPATSILE
RGRSSFYPDGGDQETA	PYEYPYTLAPATSILE	GFGLERMAAPIDRVGQ
KKAGSGKNDHAEKVAE	GFGLERMAAPIDRVGQ	QVPSGPSGAPPMPGGP
NYDGDVQSDILAQGFG	QVPSGPSGAPPMPGGP	SEAAPEAGAPTSASGL
HHFRKPANDITSQLEI	SEAAPEAGAPTSASGL	TTYTSQNNAQGPLYEQ
VAKSIDLKDKYKNIGA	TTYTSQNNAQGPLYEQ	QEMIARMQAQMQMQMQ
GSSNWEAADLGNEERK	QEMIARMQAQMQMQMQ	PNSAIFGGARPREEVV
GQYAIPQPDLTKLHQL	PNSAIFGGARPREEVV	GAAAMRSMASGGGVPT
IRRVGRRPDQQLQGEG	GAAAMRSMASGGGVPT	SLLGFSVNASSERLNM
IRRMGESDDSILRLAK	SLLGFSVNASSERLNM	ELQMTRQMASSGASGG
HLTRAYAKDVKFGADA	ELQMTRQMASSGASGG	PSTSRSLYASSPGGVY
AEKVAEKLEALSVKEE	PSTSRSLYASSPGGVY	SVGKMIGQATAADQEK
SLGSLQTPEAVTTRKG	SEYQQYQDATAEEEED	SEYQQYQDATAEEEED
QDVANNTNEEAGDGTT	SEYQQYQDATAEEEGE	VSVSALTLATETVRSI
QQYQDATAEEEEDFGE	VSVSALTLATETVRSI	LPSASTSKATISDEEI
TAPVPTVGEGYGYGHE	LPSASTSKATISDEEI	TPAPTTTTATREEAST
RKTPQGPPEIYSDTQF	TPAPTTTTATREEAST	KASKTAENATSGETLE
AAKLERLREKDKHIEE	KASKTAENATSGETLE	EIRRGVMLAVDAVIAE
EGKTKEVYELLDSPGK	EIRRGVMLAVDAVIAE	TVAVGVIKAVDKKAAG
ASVVKVLTELLEQERK	TVAVGVIKAVDKKAAG	LPLLCRGLAVEAKKTY
ESHRNANAEPAVQRTL	LPLLCRGLAVEAKKTY	GAGKHVPRAVFVDLEP
TYRQLFHPEQLITGKE	GAGKHVPRAVFVDLEP	VRDMRQTVAVGVIKAV
VLRQFVRHESETTTSL	VRDMRQTVAVGVIKAV	RGVMLAVDAVIAELKK
RGQEPQMKETIMNQEK	RGVMLAVDAVIAELKK	GGVLPNIQAVLLPKKT
RTLLIKTVETRDGQVI	GGVLPNIQAVLLPKKT	ELGEYGLQAYTEVKTV
ASIQMNVAEVDKVTGR	ELGEYGLQAYTEVKTV	PEIDITCWDADPVPEE
GFCYVEFDEVDSLKEA	PEIDITCWDADPVPEE	AKDVKFGADARALMLQ
IDVAGKPNEVTKAAES	AKDVKFGADARALMLQ	KTEMVTISDASQRTEI
PPAPETYEEYGYDDTY	KTEMVTISDASQRTEI	KHYRGPAGDATVASEK
YSQSQGDSEYYDYGHG	KHYRGPAGDATVASEK	LTFGSVRADDEVDVDG
RGSGSRGRFDDRGRSD	LTFGSVRADDEVDVDG	WHSSRPVRDDSVVEKS
IATLEAEAFDDVVGET	WHSSRPVRDDSVVEKS	RGRSSFYPDGGDQETA
PSAGLNVDFESVFGNK	RGRSSFYPDGGDQETA	PPMGSRFRDGPPLRGS
SSSSYRRMFGGPGTAS	PPMGSRFRDGPPLRGS	KKAGSGKNDHAEKVAE
AMGFQRRFFHQDQSPV	KKAGSGKNDHAEKVAE	NYDGDVQSDILAQGFG
AYQKKKLCFKENAEQG	NYDGDVQSDILAQGFG	HHFRKPANDITSQLEI
LKADKDYHFKVDNDEN	HHFRKPANDITSQLEI	KAEGDAKGDKAKVKDE
EVDKVTGRFNGQFKTY	KAEGDAKGDKAKVKDE	GGTKVVLDDKDYFLFR
TSKGQKCEFQDAYVLL	GGTKVVLDDKDYFLFR	VAKSIDLKDKYKNIGA
RKVVDYSQFQESDDAD	VAKSIDLKDKYKNIGA	GSSNWEAADLGNEERK
KRVETSEHFRIDGPVI	GSSNWEAADLGNEERK	EFGKRPAEDMEEEQAF
GDHKSTSHFRTGEEDK	GQYAIPQPDLTKLHQL	IRRVGRRPDQQLQGEG
KSKENPRNFSDNQLQE	EFGKRPAEDMEEEQAF	IRRMGESDDSILRLAK
RPPGGGSNFSLGFDEP	IRRVGRRPDQQLQGEG	HLTRAYAKDVKFGADA
NRQETYKYFSLPFCVG	IRRMGESDDSILRLAK	AEKVAEKLEALSVKEE
LKDKYKNIGAKLVQDV	HLTRAYAKDVKFGADA	SLGSLQTPEAVTTRKG
EGNNPAENGDAKTDQA	AEKVAEKLEALSVKEE	TEDSIRDYEDGMEVDT
EGDGEEEDGDEDEEAE	SLGSLQTPEAVTTRKG	LEEQITAFEDYVQSMD
KDYFLFRDGDILGKYV	TEDSIRDYEDGMEVDT	QDVANNTNEEAGDGTT
WTSDMQGDGEEQNKEA	QDVANNTNEEAGDGTT	EVKAETRAEEAPEKKR
NVPWAFMQGEIATILA	EVKAETRAEEAPEKKR	QQYQDATAEEEEDFGE
LGMPAFKPGEKVLLSD	QQYQDATAEEEEDFGE	QGDGIVEDEEETMENN
ICGAIRRMGESDDSIL	QGDGIVEDEEETMENN	SGGGVPTDEEQATGLE
EGTAPSENGETKAEEA	SGGGVPTDEEQATGLE	TAPVPTVGEGYGYGHE
KEDLPAENGETKTEES	TAPVPTVGEGYGYGHE	RKTPQGPPEIYSDTQF
ANPNSAIFGGARPREE	RKTPQGPPEIYSDTQF	AAKLERLREKDKHIEE
TVGEGYGYGHESELSQ	AAKLERLREKDKHIEE	ACKFAELKEKIDRRSG
PTSASGLNGHPTLSGG	ACKFAELKEKIDRRSG	EGKTKEVYELLDSPGK
KLKQSLPPGLAVKELK	ASVVKVLTELLEQERK	ASVVKVLTELLEQERK
VPGPLPDFGLEESGHS	RRKLVSQEEMEFIQRG	RRKLVSQEEMEFIQRG
QAQLALKPGLIGNANM	ESHRNANAEPAVQRTL	ESHRNANAEPAVQRTL
KDTAPVLEGLKEEEIT	TYRQLFHPEQLITGKE	TYRQLFHPEQLITGKE
YDQRQKSMGLPTSDEQ	FSDNQKLWERNIKSHL	FSDNQKLWERNIKSHL
GLPSTFQYGPAVFPVA	VLRQFVRHESETTTSL	VLRQFVRHESETTTSL
VQDSYEAYGQDDWNGT	FPVYRQPPESLKLEAG	FPVYRQPPESLKLEAG
IKTVETRDGQVINETS	RGQEPQMKETIMNQEK	RGQEPQMKETIMNQEK
PTNGMAKNGSEADIDE	RTLLIKTVETRDGQVI	RTLLIKTVETRDGQVI
TVIIEQSWGSPKVTKD	ASIQMNVAEVDKVTGR	ASIQMNVAEVDKVTGR
ALSSDFTCGSPTAAGK	GFCYVEFDEVDSLKEA	GFCYVEFDEVDSLKEA
ENLKSKVGGTKPAGGD	ESAEPSQLEVPATEEI	ESAEPSQLEVPATEEI
KGTENGVNGTLTSNVA	IDVAGKPNEVTKAAES	IDVAGKPNEVTKAAES
KNVIGLQMGTNRGASQ	PPAPETYEEYGYDDTY	PPAPETYEEYGYDDTY
DMRQTVAVGVIKAVDK	YSQSQGDSEYYDYGHG	YSQSQGDSEYYDYGHG
AMKKVGRKGVITVKDG	RGSGSRGRFDDRGRSD	RGSGSRGRFDDRGRSD
VRLRSSVPGVRLLQDS	IATLEAEAFDDVVGET	IATLEAEAFDDVVGET
VSSQYNMAGVRTEDSI	GGSNFSLGFDEPTEQP	GGSNFSLGFDEPTEQP
NRIIGAKDHASIQMNV	PSAGLNVDFESVFGNK	PSAGLNVDFESVFGNK
NLVGPRSAHATAPVNI	GIGGMQQHFFDDEDRT	GIGGMQQHFFDDEDRT
VISAEKAYHEQLSVAE	SSSSYRRMFGGPGTAS	SSSSYRRMFGGPGTAS
GIDPTGTYHGDSDLQL	AMGFQRRFFHQDQSPV	AMGFQRRFFHQDQSPV
FWEVISDEHGIDPTGT	AYQKKKLCFKENAEQG	AYQKKKLCFKENAEQG
ERLREKDKHIEEVRKN	LKADKDYHFKVDNDEN	LKADKDYHFKVDNDEN
MTAYGTRRHLYDPKMQ	EVDKVTGRFNGQFKTY	EVDKVTGRFNGQFKTY
SQGLSQLYHNQSQGLL	RKVVDYSQFQESDDAD	TSKGQKCEFQDAYVLL
GPLPLSSQHRGDADQA	GDHKSTSHFRTGEEDK	RKVVDYSQFQESDDAD
RLTSFIGAIAIGDLVK	KSKENPRNFSDNQLQE	KRVETSEHFRIDGPVI
RSGFPRALIDPSSGLP	RPPGGGSNFSLGFDEP	GDHKSTSHFRTGEEDK
STEMRRRRIEVNVELR	NRQETYKYFSLPFCVG	KSKENPRNFSDNQLQE
MGPKGRTVIIEQSWGS	PAFNRAAPGAEFAPNK	RPPGGGSNFSLGFDEP
THSKRTLLIKTVETRD	KQKFLRLMGAGKKEHT	NRQETYKYFSLPFCVG
QEPQMKETIMNQEKLA	LKDKYKNIGAKLVQDV	PAFNRAAPGAEFAPNK
MQVADLQSINISGNGF	GLQMGTNRGASQAGMT	KQKFLRLMGAGKKEHT
YTIQGQYAIPQPDLTK	EGNNPAENGDAKTDQA	LKDKYKNIGAKLVQDV
KHASPILPITEFSDIP	EGDGEEEDGDEDEEAE	GLQMGTNRGASQAGMT
KKRKERFGIVTSSAGT	KDYFLFRDGDILGKYV	EGNNPAENGDAKTDQA
KTTEAKMMKAGGTEIG	NVKGPVREGDVLTLLE	EGDGEEEDGDEDEEAE
AGARGGPAKANSNPFE	WTSDMQGDGEEQNKEA	KDYFLFRDGDILGKYV
SWGSPKVTKDGVTVAK	NVPWAFMQGEIATILA	NVKGPVREGDVLTLLE
FGCELKADKDYHFKVD	LGMPAFKPGEKVLLSD	WTSDMQGDGEEQNKEA
RGRPKKLEKEEEEGIS	ICGAIRRMGESDDSIL	NVPWAFMQGEIATILA
SKLDWESFKEEEGIGE	EGTAPSENGETKAEEA	LGMPAFKPGEKVLLSD
SKKAEQKKKEKIIEDK	KEDLPAENGETKTEES	ICGAIRRMGESDDSIL
YQKKKLCFKENAEQGE	GGGSNFSLGFDEPTEQ	EGTAPSENGETKAEEA
KTIIGDFQKEQKKFVE	ANPNSAIFGGARPREE	KEDLPAENGETKTEES
TRGQEPQMKETIMNQE	QSHFAMMHGGTGFAGI	GGGSNFSLGFDEPTEQ
STRSFILDKIIEEDDA	TVGEGYGYGHESELSQ	ANPNSAIFGGARPREE
VGVIKAVDKKAAGAGK	PTSASGLNGHPTLSGG	QSHFAMMHGGTGFAGI
KRVEIQMPKPAEAPTA	KLKQSLPPGLAVKELK	TVGEGYGYGHESELSQ
ETSIDVAGKPNEVTKA	VPGPLPDFGLEESGHS	PTSASGLNGHPTLSGG
LEDGPKFLKSGDAAIV	QAQLALKPGLIGNANM	KLKQSLPPGLAVKELK
TKDGVTVAKSIDLKDK	KDTAPVLEGLKEEEIT	VPGPLPDFGLEESGHS
KKASSKKQKTENVFVD	YDQRQKSMGLPTSDEQ	QAQLALKPGLIGNANM
IGKKLYEGKTKEVYEL	GGKFMKSQGLSQLYHN	KDTAPVLEGLKEEEIT
MSRPVRNRKVVDYSQF	SNYGPMKSGNFGGSRN	YDQRQKSMGLPTSDEQ
AVAPSAVNLADPRTPT	GLPSTFQYGPAVFPVA	GGKFMKSQGLSQLYHN
LVSVSALTLATETVRS	EQKNAEQNGPVDGQGD	SNYGPMKSGNFGGSRN
QGQHTISPLDLAKLNQ	VQDSYEAYGQDDWNGT	GLPSTFQYGPAVFPVA
KNQALKLQLDNQYAVL	IKTVETRDGQVINETS	EQKNAEQNGPVDGQGD
HAEKVAEKLEALSVKE	EVVRHKNRGRDEVSKN	VQDSYEAYGQDDWNGT
QESAEPSQLEVPATEE	KKIEPELDGSAQVTSH	IKTVETRDGQVINETS
GSELIQKYLGDGPKLV	PTNGMAKNGSEADIDE	EVVRHKNRGRDEVSKN
SKAIGSSPLGSGEGLL	SATFLRVVGSELIQKY	KKIEPELDGSAQVTSH
DTHSKRTLLIKTVETR	TVIIEQSWGSPKVTKD	PTNGMAKNGSEADIDE
LNLEKKARLKEEAAMK	ALSSDFTCGSPTAAGK	SATFLRVVGSELIQKY
GKTKEVYELLDSPGKV	ENLKSKVGGTKPAGGD	TVIIEQSWGSPKVTKD
LDAAGVASLLTTAEVV	KGTENGVNGTLTSNVA	ALSSDFTCGSPTAAGK
DHIPTPQDLPQRKSSL	QTTISLQMGTNKGASQ	ENLKSKVGGTKPAGGD
TADNLVLNLQDESFTR	KNVIGLQMGTNRGASQ	KGTENGVNGTLTSNVA
GADARALMLQGVDLLA	DMRQTVAVGVIKAVDK	QTTISLQMGTNKGASQ
PHQVEQTELQQEQLQT	AMKKVGRKGVITVKDG	KNVIGLQMGTNRGASQ
KELAEQLGLSTGEKEK	VRLRSSVPGVRLLQDS	DMRQTVAVGVIKAVDK
KGDLPREPLVATNLPG	VSSQYNMAGVRTEDSI	AMKKVGRKGVITVKDG
QKWWHTGALYRIGDLQ	TYAEQSYEGYEGYYSQ	VRLRSSVPGVRLLQDS
GPPLRGSNMDFREPTE	NRIIGAKDHASIQMNV	VSSQYNMAGVRTEDSI
VSSSSYRRMFGGPGTA	NLVGPRSAHATAPVNI	TYAEQSYEGYEGYYSQ
GTRGQEPQMKETIMNQ	LGMDPMMEHEMGGHHP	NRIIGAKDHASIQMNV
EPQMKETIMNQEKLAK	VISAEKAYHEQLSVAE	NLVGPRSAHATAPVNI
GGYGGQSSMSGYDQVL	GIDPTGTYHGDSDLQL	LGMDPMMEHEMGGHHP
EKVELQELNDRFANYI	FWEVISDEHGIDPTGT	VISAEKAYHEQLSVAE
KKKVWLDPNETNEIAN	CWELYCLEHGIQPDGQ	GIDPTGTYHGDSDLQL
PEAKMRMKNIGRDTPT	EQLAALKKHHEEEIVH	FWEVISDEHGIDPTGT
PSIDKTLVNKVVHSSV	ERLREKDKHIEEVRKN	CWELYCLEHGIQPDGQ
AKKIEALLNLPRNPSV	MTAYGTRRHLYDPKMQ	EQLAALKKHHEEEIVH
DYSGNYGYNNDNQEFY	SQGLSQLYHNQSQGLL	ERLREKDKHIEEVRKN
DIQPGPLFNNNADGVA	GPLPLSSQHRGDADQA	MTAYGTRRHLYDPKMQ
SVFQTNQSNNQQSNFE	QWASLAANHTRHDQEE	SQGLSQLYHNQSQGLL
ATPLNQVANPNSAIFG	EEGNPLLKHYRGPAGD	GPLPLSSQHRGDADQA
HLQAGQCGNQIGAKFW	RSGFPRALIDPSSGLP	QWASLAANHTRHDQEE
QALKLQLDNQYAVLEN	STEMRRRRIEVNVELR	EEGNPLLKHYRGPAGD
RNILSRLANRAPEPTP	MGPKGRTVIIEQSWGS	RLTSFIGAIAIGDLVK
EGFGCVVTNRFDQLFD	THSKRTLLIKTVETRD	RSGFPRALIDPSSGLP
PLNQVANPNSAIFGGA	QEPQMKETIMNQEKLA	STEMRRRRIEVNVELR
EASQSHLRNSPEDKRA	MQVADLQSINISGNGF	MGPKGRTVIIEQSWGS
DAGKEGNNPAENGDAK	YTIQGQYAIPQPDLTK	THSKRTLLIKTVETRD
DLKAARSIPAGAEPGE	KHASPILPITEFSDIP	QEPQMKETIMNQEKLA
SHRNANAEPAVQRTLL	KKRKERFGIVTSSAGT	MQVADLQSINISGNGF
GPPQPWGHPDVHIMQH	DDSILRLAKADGIVSK	YTIQGQYAIPQPDLTK
ASAPDVDDPEAFPALA	KTTEAKMMKAGGTEIG	KHASPILPITEFSDIP
FPTFKFEDPKFEVIEK	AGARGGPAKANSNPFE	KKRKERFGIVTSSAGT
GEEAGPGDPLLEAVPK	SWGSPKVTKDGVTVAK	DDSILRLAKADGIVSK
RTAGIQRIPLPPPPAP	REDMAALEKDYEEVGV	KTTEAKMMKAGGTEIG
GKETKAADPPAENSSA	GTKVVLDDKDYFLFRD	AGARGGPAKANSNPFE
LQLLASSDPPALASKN	FGCELKADKDYHFKVD	SWGSPKVTKDGVTVAK
LDRYFEADPPGQVAAS	AKLLAKRMKEAKEKRQ	REDMAALEKDYEEVGV
AKMKNKQLPSAGPDKN	QGDGEEQNKEALQDVE	GTKVVLDDKDYFLFRD
DITCWDADPVPEEEEG	RGRPKKLEKEEEEGIS	FGCELKADKDYHFKVD
QEPANPNMPVVLTSGT	SKLDWESFKEEEGIGE	AKLLAKRMKEAKEKRQ
PKAEVARAQAALAVNI	SKKAEQKKKEKIIEDK	QGDGEEQNKEALQDVE
MSGYDQVLQENSSDFQ	YQKKKLCFKENAEQGE	RGRPKKLEKEEEEGIS
GMSSSLNQQGAHSALS	LTHKMEANKENREAQM	SKLDWESFKEEEGIGE
MGGKFMKSQGLSQLYH	KTIIGDFQKEQKKFVE	SKKAEQKKKEKIIEDK
KVQNGSVHQKDGLNDD	DDEKLKKRKERFGIVT	YQKKKLCFKENAEQGE
LGMSSSLNQQGAHSAL	TRGQEPQMKETIMNQE	LTHKMEANKENREAQM
HDMRVHPYQRIVTADR	FPVGSKKNKGDSHLNV	KTIIGDFQKEQKKFVE
RFAVRDMRQTVAVGVI	IMSQSQVSKGVDFESS	DDEKLKKRKERFGIVT
RTVATPLNQVANPNSA	REQLAALKKHHEEEIV	TRGQEPQMKETIMNQE
IKALEAHKRAEEFLTA	STRSFILDKIIEEDDA	FPVGSKKNKGDSHLNV
VKAKFFSRRAEEKIKS	VGVIKAVDKKAAGAGK	IMSQSQVSKGVDFESS
VVRHKNRGRDEVSKNQ	GSKKAEQKKKEKIIED	REQLAALKKHHEEEIV
TVHTEWTQRDLERMEN	KDMPPRFSKKGQLNAD	STRSFILDKIIEEDDA
VNVDKVLERDQKLSEL	DHAEKVAEKLEALSVK	VGVIKAVDKKAAGAGK
TLSGGGDQREAQTLDS	ILRIDDLIKLHPESKD	GSKKAEQKKKEKIIED
PEAAQMVRREFQLDLD	SFPATGCQKLIEVDDE	KDMPPRFSKKGQLNAD
QVRAALLSRELAGGLE	KSFEVVRHKNRGRDEV	DHAEKVAEKLEALSVK
PNFSSLNLRETNLDSL	KRVEIQMPKPAEAPTA	ILRIDDLIKLHPESKD
EKLKKRKERFGIVTSS	ETSIDVAGKPNEVTKA	SFPATGCQKLIEVDDE
GSQSSKAPRGDVTAEE	PTAAQAKSKQAILAAQ	KSFEVVRHKNRGRDEV
QAILAAQRRGEDVETS	ARLFGIRAKRAKEAAE	ADAINTEFKNTRTNEK
TKKKRGSYRGGSISVQ	GRAMHLMKKREKQREQ	ETSIDVAGKPNEVTKA
QPSPVMTRRGLRDSHS	FSSSSSTRKRGPSEET	PTAAQAKSKQAILAAQ
GVREKRRGRGTGEAEE	RGSRRTPRKRVETSEH	ARLFGIRAKRAKEAAE
RVETSEHFRIDGPVIS	LEDGPKFLKSGDAAIV	GRAMHLMKKREKQREQ
HRRQEELKRLEENDDD	TKDGVTVAKSIDLKDK	RGSRRTPRKRVETSEH
RLGRSKRKRLEVEEPL	KQKMSTLEKSKLDWES	LEDGPKFLKSGDAAIV
LERKKETQRLLEEEDS	PRTVSGRYKSTTSVSE	TKDGVTVAKSIDLKDK
PLLGGALQRQIRGIPG	KKASSKKQKTENVFVD	KQKMSTLEKSKLDWES
GRFAVRDMRQTVAVGV	IGKKLYEGKTKEVYEL	PRTVSGRYKSTTSVSE
QGKRKTLQRRDLDNAI	IDLAVLLGKTPSTMEN	KKASSKKQKTENVFVD
ESHPHGVKRSASPDDD	HSKRTLLIKTVETRDG	IGKKLYEGKTKEVYEL
GQIPGRERRSGPTDDG	MSRPVRNRKVVDYSQF	IDLAVLLGKTPSTMEN
GGRPNRGSRTDKSSAS	AVAPSAVNLADPRTPT	HSKRTLLIKTVETRDG
EVEGKMVSRTEGNIDD	LVSVSALTLATETVRS	PVSVKVGDKVLLPEYG
DHKSTSHFRTGEEDKK	QGQHTISPLDLAKLNQ	MSRPVRNRKVVDYSQF
PLVDTHSKRTLLIKTV	KNQALKLQLDNQYAVL	QGQHTISPLDLAKLNQ
TPVTLKQRRVEHNQSY	HAEKVAEKLEALSVKE	KNQALKLQLDNQYAVL
NVYKKEKARVITEEEK	REGDVLTLLESEREAR	HAEKVAEKLEALSVKE
PEPPPRSRRVPRPPER	QESAEPSQLEVPATEE	REGDVLTLLESEREAR
MGGTTSTRRVTFEADE	GSELIQKYLGDGPKLV	QESAEPSQLEVPATEE
LNQVANPNSAIFGGAR	SKAIGSSPLGSGEGLL	GSELIQKYLGDGPKLV
KQKADVTLSALNDSDA	LRIDDLIKLHPESKDD	SKAIGSSPLGSGEGLL
STRTYSLGSALRPSTS	RRKHQITYLIHQAKER	LRIDDLIKLHPESKDD
APARYSLQSANASSLS	DTHSKRTLLIKTVETR	RRKHQITYLIHQAKER
NSSFYSTRSAPASQAS	QNYLFGCELKADKDYH	DTHSKRTLLIKTVETR
GQYIENLMSASSVFQT	LNLEKKARLKEEAAMK	QNYLFGCELKADKDYH
GAIRRMGESDDSILRL	RAQRPRLQLKPRTVAT	LNLEKKARLKEEAAMK
RQRTAEAFSDEKTQIV	DDDAGSAPLKSSGQHQ	RAQRPRLQLKPRTVAT
LELRNRTPSDVKELVL	IHLHRALQLLDEVLHT	DDDAGSAPLKSSGQHQ
RKGTGLLSSDYRIING	GKTKEVYELLDSPGKV	GKTKEVYELLDSPGKV
LVPPRYARSEIVGVSR	QTVTQLQQLLQAVNQQ	QTVTQLQQLLQAVNQQ
EVEKNSTPSEPGSGRG	LDAAGVASLLTTAEVV	LDAAGVASLLTTAEVV
EMPDTVLQSETLKDTA	SKKTVELPLNKEEIER	SKKTVELPLNKEEIER
ESNMNDLVSEYQQYQD	KERAQRFGLNVSSISR	KERAQRFGLNVSSISR
YYSQSQGDSEYYDYGH	SVTKEGLELPEDEEEK	SVTKEGLELPEDEEEK
LKEKIDRRSGKKLEDG	DHIPTPQDLPQRKSSL	DHIPTPQDLPQRKSSL
ERLKGLLQSGQIPGRE	TADNLVLNLQDESFTR	TADNLVLNLQDESFTR
RDEVSHLQSGSHLANN	GADARALMLQGVDLLA	GADARALMLQGVDLLA
GYGGQSSMSGYDQVLQ	PHQVEQTELQQEQLQT	PHQVEQTELQQEQLQT
AFVQPTQQSHPQIEPA	QMAAKLERLREKDKHI	QMAAKLERLREKDKHI
NVPASVCYSHTDIKVP	DLEIGPGQLSSSTFDS	DLEIGPGQLSSSTFDS
KDGVTVAKSIDLKDKY	KELAEQLGLSTGEKEK	KELAEQLGLSTGEKEK
PSSATADTSIFAGQND	KVAEKLEALSVKEETK	KVAEKLEALSVKEETK
TLATETVRSILKIDDV	PLLVSVSALTLATETV	PLLVSVSALTLATETV
RRMGESDDSILRLAKA	KGDLPREPLVATNLPG	KGDLPREPLVATNLPG
VMQVADLQSINISGNG	RCSRYLYTLVITDKEK	RCSRYLYTLVITDKEK
QRFGLNVSSISRKSED	QKWWHTGALYRIGDLQ	QKWWHTGALYRIGDLQ
DLIKLHPESKDDKHGS	GPPLRGSNMDFREPTE	GPPLRGSNMDFREPTE
RGRGAGRNSKQQLSAE	RKLVSQEEMEFIQRGG	RKLVSQEEMEFIQRGG
RPRSPGSNSKVPEIEV	VSSSSYRRMFGGPGTA	VSSSSYRRMFGGPGTA
EDRVGTIKSKVVGDRE	NASSERLNMGEIETLD	NASSERLNMGEIETLD
PASKFSSASKYAALSV	DQTTISLQMGTNKGAS	DQTTISLQMGTNKGAS
WVFKVSHFSKYGLQDS	GKNVIGLQMGTNRGAS	GKNVIGLQMGTNRGAS
VTTSTRTYSLGSALRP	GTRGQEPQMKETIMNQ	GTRGQEPQMKETIMNQ
PVYRQPPESLKLEAGD	EPQMKETIMNQEKLAK	EPQMKETIMNQEKLAK
SRLRSVLMSLKQTPLS	ARMQAQMQMQMQGGDG	ARMQAQMQMQMQGGDG
SLPLPNFSSLNLRETN	GGYGGQSSMSGYDQVL	GGYGGQSSMSGYDQVL
LMNLGMSSSLNQQGAH	LASLMNLGMSSSLNQQ	LASLMNLGMSSSLNQQ
MSKSFQQSSLSRDSQG	TCGIADKPMTQYQDTS	AMQQSHFPMTHGNTGF
QDLPQRKSSLVTSKLA	STTYTSQNNAQGPLYE	TCGIADKPMTQYQDTS
ASTASQLHSNVVNYVQ	EKVELQELNDRFANYI	STTYTSQNNAQGPLYE
ASQSHLRNSPEDKRAG	KKKVWLDPNETNEIAN	EKVELQELNDRFANYI
KEVYELLDSPGKVLLQ	AQVATISANGDKEIGN	KKKVWLDPNETNEIAN
RNRKVVDYSQFQESDD	PEAKMRMKNIGRDTPT	AQVATISANGDKEIGN
RTAAFRALSQGVESVK	AKKIEALLNLPRNPSV	PEAKMRMKNIGRDTPT
TKQNSVPPSQTKSETS	DYSGNYGYNNDNQEFY	PSIDKTLVNKVVHSSV
ARSQAPLESSLDSLGD	DIQPGPLFNNNADGVA	KVEVNNLNNLNNHDRK
ISLPLPNFSSLNLRET	SVFQTNQSNNQQSNFE	AKKIEALLNLPRNPSV
RSQPAFMQSSLSQPSV	ATPLNQVANPNSAIFG	DYSGNYGYNNDNQEFY
PQDLPQRKSSLVTSKL	HLQAGQCGNQIGAKFW	DIQPGPLFNNNADGVA
SNIVEVVQSSPVERPS	QALKLQLDNQYAVLEN	SVFQTNQSNNQQSNFE
TPKTPKGPSSVEDIKA	RNILSRLANRAPEPTP	ATPLNQVANPNSAIFG
RSSAVRLRSSVPGVRL	EGFGCVVTNRFDQLFD	HLQAGQCGNQIGAKFW
EVVYSKAASVPKVETV	PLNQVANPNSAIFGGA	QALKLQLDNQYAVLEN
LVVQPLLVSVSALTLA	PLILKPFGNSISRYNG	RNILSRLANRAPEPTP
YGHGEVQDSYEAYGQD	EASQSHLRNSPEDKRA	EGFGCVVTNRFDQLFD
KQQNQYQASYNQSFSS	SHFPMTHGNTGFSGIE	PLNQVANPNSAIFGGA
QRRVEHNQSYSQAGIT	KDHASIQMNVAEVDKV	PLILKPFGNSISRYNG
AAPVAADTTAAPAAAA	YGEYMDKNNVRRQATT	KRKVKQLFNSLATQEG
IDPTKVVRTALLDAAG	PLMSLRTAPAANLASR	EASQSHLRNSPEDKRA
KQEAGKEGTAPSENGE	DAGKEGNNPAENGDAK	SHFPMTHGNTGFSGIE
SARTPAIPTAVNLADS	DLKAARSIPAGAEPGE	KDHASIQMNVAEVDKV
KDVRWPTETDVSSAKN	SHRNANAEPAVQRTLL	YGEYMDKNNVRRQATT
KVKSLKFATEAAITIL	GPPQPWGHPDVHIMQH	PLMSLRTAPAANLASR
SNMDFREPTEEERAQR	ASAPDVDDPEAFPALA	DAGKEGNNPAENGDAK
FSLADAINTEFKNTRT	SRLSFQHDPETSVLVL	DLKAARSIPAGAEPGE
ETVISTKKTEKSNIEE	VCTLAIIDPGDSDIIR	SHRNANAEPAVQRTLL
AANASATTTEPLPEKT	SLPYYTGVPGLPSTFQ	GPPQPWGHPDVHIMQH
SVSALTLATETVRSIL	FPTFKFEDPKFEVIEK	ASAPDVDDPEAFPALA
VCSNPPCETHETGTTH	GEEAGPGDPLLEAVPK	SRLSFQHDPETSVLVL
MQQSHFPMTHGNTGFS	LKPRTVATPLNQVANP	VCTLAIIDPGDSDIIR
TVSVTELQTHPELDTD	RIDRKIEFPLPDEKTK	SLPYYTGVPGLPSTFQ
RTLKIPAMTIAKNAGV	RTAGIQRIPLPPPPAP	FPTFKFEDPKFEVIEK
AYSIQGQHTISPLDLA	GKETKAADPPAENSSA	GEEAGPGDPLLEAVPK
SIPADLDKTITELADW	LQLLASSDPPALASKN	LKPRTVATPLNQVANP
TQEKNTLPTKETIEQE	GYHIYSSDPPFEVRGA	RIDRKIEFPLPDEKTK
PYLTGKRHTLEKNVLV	LDRYFEADPPGQVAAS	GKETKAADPPAENSSA
ERSYVSKPTLKEVVIV	TQSKQQQMPPPPPPPP	LQLLASSDPPALASKN
LVDTHSKRTLLIKTVE	RNRMVRGDPRAIVEYR	GYHIYSSDPPFEVRGA
KTETQEKNTLPTKETI	AKMKNKQLPSAGPDKN	LDRYFEADPPGQVAAS
GTENGVNGTLTSNVAD	PKWINATDPSARTLTH	TQSKQQQMPPPPPPPP
VRCSRYLYTLVITDKE	GLGIDEDDPTADDTSA	RNRMVRGDPRAIVEYR
SRQAQKVATPLPDPMA	PLHGVLKTPTSSPASS	AKMKNKQLPSAGPDKN
ANYPSSSRTPQAPASA	DITCWDADPVPEEEEG	PKWINATDPSARTLTH
CGIADKPMTQYQDTSK	LVPVPVSEPVPEPEPE	GLGIDEDDPTADDTSA
TLLIKTVETRDGQVIN	QEPANPNMPVVLTSGT	PLHGVLKTPTSSPASS
RFPTDYASTSEDEFGS	PKAEVARAQAALAVNI	LVPVPVSEPVPEPEPE
GETLQMLTTSTTLEKL	MSGYDQVLQENSSDFQ	QEPANPNMPVVLTSGT
AAAPVAADTTAAPAAA	GKQAEVANQETKEDLP	PKAEVARAQAALAVNI
AAGVASLLTTAEVVVT	GMSSSLNQQGAHSALS	MSGYDQVLQENSSDFQ
SVQATQLQTTQSVEGA	MGGKFMKSQGLSQLYH	GKQAEVANQETKEDLP
YRPPGARLTTTRKTPQ	KVQNGSVHQKDGLNDD	GMSSSLNQQGAHSALS
SKRTLLIKTVETRDGQ	RMQAQMQMQMQGGDGD	MGGKFMKSQGLSQLYH
KKLGELTGTVKESLHE	LGMSSSLNQQGAHSAL	KVQNGSVHQKDGLNDD
TTTTHITKTVKGGISE	REQMEQMKQRIAEENI	RMQAQMQMQMQGGDGD
AASVPKVETVKSDNKD	HDMRVHPYQRIVTADR	LGMSSSLNQQGAHSAL
TLKMSVQPTVSLGGFE	RFAVRDMRQTVAVGVI	REQMEQMKQRIAEENI
ELQQEQLQTVVGTYHG	RTVATPLNQVANPNSA	HDMRVHPYQRIVTADR
TVATPLNQVANPNSAI	VKAKFFSRRAEEKIKS	RFAVRDMRQTVAVGVI
AVRDMRQTVAVGVIKA	LRNSPEDKRAGGEESQ	RTVATPLNQVANPNSA
KSSASAPDVDDPEAFP	VVRHKNRGRDEVSKNQ	IKALEAHKRAEEFLTA
AEDDEDDDVDTKKQKT	LLIKTVETRDGQVINE	VKAKFFSRRAEEKIKS
TEPPYTAYVGNLPFNT	SIRSVRLVRDKDTDKF	LRNSPEDKRAGGEESQ
RDMRQTVAVGVIKAVD	TVHTEWTQRDLERMEN	VVRHKNRGRDEVSKNQ
MRQTVAVGVIKAVDKK	VNVDKVLERDQKLSEL	LLIKTVETRDGQVINE
TVETRDGQVINETSQH	SPPQKRMRRDWDEHSS	SIRSVRLVRDKDTDKF
GFGEISSPVIREAEVT	TLSGGGDQREAQTLDS	TVHTEWTQRDLERMEN
FPLATYAPVISAEKAY	PEAAQMVRREFQLDLD	VNVDKVLERDQKLSEL
VYKKEKARVITEEEKN	MAAKLERLREKDKHIE	SPPQKRMRRDWDEHSS
MKKVGRKGVITVKDGK	RAMHLMKKREKQREQM	TLSGGGDQREAQTLDS
SSMSGYDQVLQENSSD	QVRAALLSRELAGGLE	PEAAQMVRREFQLDLD
NMNAPVPPVNEPETLK	PNFSSLNLRETNLDSL	MAAKLERLREKDKHIE
MASLSLAPVNIFKAGA	FSDYPPLGRFAVRDMR	RAMHLMKKREKQREQM
SAEPSQLEVPATEEIK	GFGCVVTNRFDQLFDD	QVRAALLSRELAGGLE
YPPLGRFAVRDMRQTV	SDNGVRVQRFFVADTA	PNFSSLNLRETNLDSL
LGGQDQLRVRVTELED	EKLKKRKERFGIVTSS	FSDYPPLGRFAVRDMR
VRSIQEAPVSEDLVIR	GSQSSKAPRGDVTAEE	GFGCVVTNRFDQLFDD
IRYVERSYVSKPTLKE	QAILAAQRRGEDVETS	SDNGVRVQRFFVADTA
RAQRFGLNVSSISRKS	TKKKRGSYRGGSISVQ	EKLKKRKERFGIVTSS
PKSGPSVPVSVQTKDD	QPSPVMTRRGLRDSHS	GSQSSKAPRGDVTAEE
DVAGKPNEVTKAAESP	GVREKRRGRGTGEAEE	QAILAAQRRGEDVETS
RDLPTIPGVTSPSSDE	RVETSEHFRIDGPVIS	TKKKRGSYRGGSISVQ
KGIIDPTKVVRTALLD	KDFLLTARRKDAKSVK	QPSPVMTRRGLRDSHS
DDDLGSSNWEAADLGN	SEVDKKLKRKKQVAPE	GVREKRRGRGTGEAEE
NTQPIPILYEHQLGQA	HRRQEELKRLEENDDD	RVETSEHFRIDGPVIS
HGIDPTGTYHGDSDLQ	RLGRSKRKRLEVEEPL	SEVDKKLKRKKQVAPE
GDPRAIVEYRDLDAPD	LERKKETQRLLEEEDS	HRRQEELKRLEENDDD
VRNRKVVDYSQFQESD	FSVNASSERLNMGEIE	RLGRSKRKRLEVEEPL
AGSGTPREEEGPAGEA	AQMAAKLERLREKDKH	LERKKETQRLLEEEDS
ENLKKTPKKKMKMVTG	KDLSIRSVRLVRDKDT	AQMAAKLERLREKDKH
NTDESNHDPQFEPIVS	DVETMRRHRNEVTVEL	KDLSIRSVRLVRDKDT
NHDPQFEPIVSLPEQE	DLETMRRQRNEVVVEL	DVETMRRHRNEVTVEL
VDTPSGTNSGAGKKRF	PLLGGALQRQIRGIPG	DLETMRRQRNEVVVEL
SNGSIGRDPPAETQPQ	GRFAVRDMRQTVAVGV	PLLGGALQRQIRGIPG
RFAGKVTTASVKERRE	QGKRKTLQRRDLDNAI	GRFAVRDMRQTVAVGV
FAGKVTTASVKERREI	RPATGRFRRREQRDPT	QGKRKTLQRRDLDNAI
DVVATGADPSDLESGG	KTTTVKFNRRKVMDSD	RPATGRFRRREQRDPT
EEAREKMLAAKSADGS	PVVRKIFRRRRGDSES	KTTTVKFNRRKVMDSD
QQKQEPLGSDSEGVNC	MPVVRKIFRRRRGDSE	PVVRKIFRRRRGDSES
EIKMEEESGAPGVPSG	EKRASSPFRRVREEEI	MPVVRKIFRRRRGDSE
RGLQDVLRTNLGPKGT	KAKLRPRNRSAEEGEL	EKRASSPFRRVREEEI
EIQKDVQTYYGQVLKR	ESHPHGVKRSASPDDD	KAKLRPRNRSAEEGEL
QKDVQTYYGQVLKRSA	GQIPGRERRSGPTDDG	ESHPHGVKRSASPDDD
KDVQTYYGQVLKRSAD	NRGINTLERSKVEETT	GQIPGRERRSGPTDDG
TYYGQVLKRSADLQTN	TSKPGLRPRTALGDIG	NRGINTLERSKVEETT
KKAFTELQAKVIDTQQ	GGRPNRGSRTDKSSAS	TSKPGLRPRTALGDIG
VQHVQAAQQIQAAEIP	EVEGKMVSRTEGNIDD	GGRPNRGSRTDKSSAS
PEEHIPHQQIQAQLVA	DHKSTSHFRTGEEDKK	EVEGKMVSRTEGNIDD
HQQIQAQLVAGQSLAG	EKDRESLRRTKNETDE	DHKSTSHFRTGEEDKK
QIQAQLVAGQSLAGGQ	VKNFGRSGRTKYTHLV	EKDRESLRRTKNETDE
AQLVAGQSLAGGQQIQ	PLVDTHSKRTLLIKTV	VKNFGRSGRTKYTHLV
RSTAPSAAASASASAA	PPREAHFVRTNGKEPE	PLVDTHSKRTLLIKTV
AAAVPSSGSGVGGGGT	AVTMGPKGRTVIIEQS	PPREAHFVRTNGKEPE
SQAVEEMRSRVVLGEF	TPVTLKQRRVEHNQSY	AVTMGPKGRTVIIEQS
EMRSRVVLGEFGVRNV	NVYKKEKARVITEEEK	TPVTLKQRRVEHNQSY
SRVVLGEFGVRNVHTT	PEPPPRSRRVPRPPER	NVYKKEKARVITEEEK
GPMDKKEE________	MGGTTSTRRVTFEADE	MGGTTSTRRVTFEADE
KENVQPLRQGRIMSTL	LNQVANPNSAIFGGAR	LNQVANPNSAIFGGAR
AAVKTLNPKAEVARAQ	KQKADVTLSALNDSDA	KQKADVTLSALNDSDA
VKTLNPKAEVARAQAA	STRTYSLGSALRPSTS	STRTYSLGSALRPSTS
KTLNPKAEVARAQAAL	EEILITVLSAMTEEAA	EEILITVLSAMTEEAA
TLNPKAEVARAQAALA	NSSFYSTRSAPASQAS	APARYSLQSANASSLS
LNPKAEVARAQAALAV	GQYIENLMSASSVFQT	NSSFYSTRSAPASQAS
AALAVNISAARGLQDV	GAIRRMGESDDSILRL	GQYIENLMSASSVFQT
EEDRSKLRSVSVDLNV	RQRTAEAFSDEKTQIV	GAIRRMGESDDSILRL
SEPKLSKNELKRRLKA	KTFKPIDLSDLKRRST	RQRTAEAFSDEKTQIV
KDENKLSSANGHEERS	RKGTGLLSSDYRIING	KTFKPIDLSDLKRRST
ENKLSSANGHEERSKK	LVPPRYARSEIVGVSR	LELRNRTPSDVKELVL
ALRRQRLAELQAKHGD	IKIILDLISESPIKGR	RKGTGLLSSDYRIING
RQRLAELQAKHGDPGD	EMPDTVLQSETLKDTA	LVPPRYARSEIVGVSR
DSVEAAKNASNTEKLT	ESNMNDLVSEYQQYQD	EVEKNSTPSEPGSGRG
EAAKNASNTEKLTDQV	LKEKIDRRSGKKLEDG	IKIILDLISESPIKGR
KLKARQLTVQMMQNPQ	VVLRLKCGSGPVHISG	EMPDTVLQSETLKDTA
ERAYQKQPTIFQNKKR	PFLSRESLSGQAVRRP	ESNMNDLVSEYQQYQD
SLDELIRKRGAAAKGR	ERLKGLLQSGQIPGRE	YYSQSQGDSEYYDYGH
ELIRKRGAAAKGRLNA	RDEVSHLQSGSHLANN	LKEKIDRRSGKKLEDG
LIRKRGAAAKGRLNAR	GYGGQSSMSGYDQVLQ	PFLSRESLSGQAVRRP
IRKRGAAAKGRLNARP	AFVQPTQQSHPQIEPA	ERLKGLLQSGQIPGRE
NEERKQKFLRLMGAGK	NVPASVCYSHTDIKVP	RDEVSHLQSGSHLANN
EERKQKFLRLMGAGKK	GSGANRKPSHTSAVSI	GYGGQSSMSGYDQVLQ
ERKQKFLRLMGAGKKE	LSCNSNFHSIASVLLQ	NVPASVCYSHTDIKVP
EKLDNQRLKNFKNKGR	KDGVTVAKSIDLKDKY	GSGANRKPSHTSAVSI
QRLKNFKNKGRDLETM	TLATETVRSILKIDDV	LSCNSNFHSIASVLLQ
LTAASTAPISFGFTRT	RRMGESDDSILRLAKA	KDGVTVAKSIDLKDKY
AASTAPISFGFTRTSA	QRFGLNVSSISRKSED	PSSATADTSIFAGQND
SLQYEYKANSNLVLQA	DLIKLHPESKDDKHGS	TLATETVRSILKIDDV
ANSNLVLQADRSLIDR	RGRGAGRNSKQQLSAE	RRMGESDDSILRLAKA
GETVGKTDYIPLLDVD	RPRSPGSNSKVPEIEV	VMQVADLQSINISGNG
VGKTDYIPLLDVDEKT	EDRVGTIKSKVVGDRE	QRFGLNVSSISRKSED
KTDYIPLLDVDEKTGN	PASKFSSASKYAALSV	DLIKLHPESKDDKHGS
EVLEERQKRLPYVPEP	WVFKVSHFSKYGLQDS	RGRGAGRNSKQQLSAE
METKIKNYKTAPFDSR	PPGGGSNFSLGFDEPT	RPRSPGSNSKVPEIEV
ETKIKNYKTAPFDSRF	VTTSTRTYSLGSALRP	EDRVGTIKSKVVGDRE
GQLVGVDLNTGEPMVA	PVYRQPPESLKLEAGD	PASKFSSASKYAALSV
VQRTLLEK________	SRLRSVLMSLKQTPLS	WVFKVSHFSKYGLQDS
QKLINPVKTSRNHQDL	SLPLPNFSSLNLRETN	PPGGGSNFSLGFDEPT
KSSLNSSPWSGLMALG	LMNLGMSSSLNQQGAH	VTTSTRTYSLGSALRP
AEQVALSRTQVCGILR	NLRETNLDSLPLVDTH	PVYRQPPESLKLEAGD
QVALSRTQVCGILREE	MSKSFQQSSLSRDSQG	SRLRSVLMSLKQTPLS
WDTVTVLRKKGPTAAQ	QDLPQRKSSLVTSKLA	SLPLPNFSSLNLRETN
TEERSLDNFFAKRDKK	AQAAAQTNSNAAGKQL	LMNLGMSSSLNQQGAH
EERSLDNFFAKRDKKK	ASTASQLHSNVVNYVQ	NLRETNLDSLPLVDTH
DNFFAKRDKKKKKERS	ASQSHLRNSPEDKRAG	MSKSFQQSSLSRDSQG
FFAKRDKKKKKERSNR	KEVYELLDSPGKVLLQ	QDLPQRKSSLVTSKLA
FNGQFKTYAICGAIRR	LSSDFTCGSPTAAGKK	AQAAAQTNSNAAGKQL
GLGLEFQA________	CPANWTPDSPTIKPSP	ASTASQLHSNVVNYVQ
GLALELEA________	RNRKVVDYSQFQESDD	ASQSHLRNSPEDKRAG
SGSSKGGPLQALTRES	PMFVETQASQGTLQTR	KEVYELLDSPGKVLLQ
SKGGPLQALTRESTRG	RTAAFRALSQGVESVK	AAAAMNLASPRTAVAP
FEDADVDH________	TKQNSVPPSQTKSETS	LSSDFTCGSPTAAGKK
APAIESVD________	YNNPAGLYSSENISNF	CPANWTPDSPTIKPSP
FKNTRTNEKVELQELN	LLGFSVNASSERLNMG	RNRKVVDYSQFQESDD
LTKLHQLAMQQSHFPM	AQRFGLNVSSISRKSE	PMFVETQASQGTLQTR
DGIVSKNF________	APSDFINFSSLDDEGD	RTAAFRALSQGVESVK
KFGADARALMLQGVDL	ARSQAPLESSLDSLGD	TKQNSVPPSQTKSETS
FGADARALMLQGVDLL	ISLPLPNFSSLNLRET	NNEQPTLQSSAQLLLQ
DARALMLQGVDLLADA	RSQPAFMQSSLSQPSV	LLGFSVNASSERLNMG
DMGFGLFD________	PQDLPQRKSSLVTSKL	AQRFGLNVSSISRKSE
KTHEDIEAQIREIQGK	SNIVEVVQSSPVERPS	ARSQAPLESSLDSLGD
AQIREIQGKKAALDEA	TPKTPKGPSSVEDIKA	ISLPLPNFSSLNLRET
DKYKNIGAKLVQDVAN	RSSAVRLRSSVPGVRL	RSQPAFMQSSLSQPSV
EERADATNVNNWHWTE	AAAASARASSWWTHVE	PQDLPQRKSSLVTSKL
RADATNVNNWHWTERD	DTQFPSLQSTAKHVES	SNIVEVVQSSPVERPS
ALEIANAHRKPLVIIA	SYSFSDLNSTRGDADM	TPKTPKGPSSVEDIKA
KKLNFDQA________	GMNHSTLHSVFQTNQS	RSSAVRLRSSVPGVRL
KEDAEEKQ________	EVVYSKAASVPKVETV	AAAASARASSWWTHVE
NFGDLGRPGRGGRGGR	LVVQPLLVSVSALTLA	DTQFPSLQSTAKHVES
FGDLGRPGRGGRGGRG	TRLSPPRASYDDPYKK	SYSFSDLNSTRGDADM
TFIAIKPDGVQRGLVG	YGHGEVQDSYEAYGQD	GMNHSTLHSVFQTNQS
FEVKVNRQKFQILGRK	KQQNQYQASYNQSFSS	EVVYSKAASVPKVETV
GAVATKVRRHDMRVHP	QRRVEHNQSYSQAGIT	LVVQPLLVSVSALTLA
DRVGQTIERMGSGVER	AAPVAADTTAAPAAAA	TRLSPPRASYDDPYKK
EQRSTQTRRYPSSISS	AGVASLLTTAEVVVTE	YGHGEVQDSYEAYGQD
GGALGHHV________	IDPTKVVRTALLDAAG	KQQNQYQASYNQSFSS
AVIQHRPSRQYATLDV	KQEAGKEGTAPSENGE	QRRVEHNQSYSQAGIT
VIQHRPSRQYATLDVY	SARTPAIPTAVNLADS	AAPVAADTTAAPAAAA
QHRPSRQYATLDVYNP	PQYAHMQTTAVPVEEA	AGVASLLTTAEVVVTE
GAASEAGRAMHLMKKR	KVKSLKFATEAAITIL	IDPTKVVRTALLDAAG
HEQILVLDPPTDLKFK	SNMDFREPTEEERAQR	KQEAGKEGTAPSENGE
TAILKQKNRPNRLIVD	FSLADAINTEFKNTRT	SARTPAIPTAVNLADS
GGGKIRTRRCHQGPIK	ETVISTKKTEKSNIEE	KDVRWPTETDVSSAKN
VSDGVIKVFNDMKVRK	AANASATTTEPLPEKT	KVKSLKFATEAAITIL
KEQNRELRGTQRAIIR	SVSALTLATETVRSIL	SNMDFREPTEEERAQR
RAETARLTSFIGAIAI	YSQAGITETEWTSGSS	FSLADAINTEFKNTRT
AETARLTSFIGAIAIG	VCSNPPCETHETGTTH	ETVISTKKTEKSNIEE
DYTQQATQSYGAYPTQ	GCSNPPCETHETGTTN	AANASATTTEPLPEKT
TQQATQSYGAYPTQPG	MQQSHFPMTHGNTGFS	SVSALTLATETVRSIL
QQATQSYGAYPTQPGQ	TVSVTELQTHPELDTD	YSQAGITETEWTSGSS
EILLTELQGDSRSLPF	RTLKIPAMTIAKNAGV	VCSNPPCETHETGTTH
VKELEKRASGQAFELI	AGWKPGSDTIKPDVQK	GCSNPPCETHETGTTN
KELEKRASGQAFELIL	AYSIQGQHTISPLDLA	MQQSHFPMTHGNTGFS
ELEKRASGQAFELILS	SIPADLDKTITELADW	TVSVTELQTHPELDTD
LEKRASGQAFELILSP	TQEKNTLPTKETIEQE	RTLKIPAMTIAKNAGV
EKRASGQAFELILSPR	PYLTGKRHTLEKNVLV	AGWKPGSDTIKPDVQK
KRASGQAFELILSPRS	DKENRGINTLERSKVE	AYSIQGQHTISPLDLA
RASGQAFELILSPRSK	ERSYVSKPTLKEVVIV	SIPADLDKTITELADW
SGQAFELILSPRSKES	LVDTHSKRTLLIKTVE	TQEKNTLPTKETIEQE
GQAFELILSPRSKESV	KTETQEKNTLPTKETI	PYLTGKRHTLEKNVLV
EIETLDDY________	GTENGVNGTLTSNVAD	DKENRGINTLERSKVE
DSKRGEAPFAQRIDPT	VRCSRYLYTLVITDKE	ERSYVSKPTLKEVVIV
REKLTPEQLHSMRQAE	TERFGQAATMEGIGAI	LVDTHSKRTLLIKTVE
SVLVLIVGLSTVGAGA	QLKPRTVATPLNQVAN	KTETQEKNTLPTKETI
VYATRSSAVRLRSSVP	SRQAQKVATPLPDPMA	GTENGVNGTLTSNVAD
PEGDGLLEYSTFNFWR	ANYPSSSRTPQAPASA	VRCSRYLYTLVITDKE
GEEAEEEA________	KKQQISLATQMVRMIL	TERFGQAATMEGIGAI
EEAEEEVA________	CGIADKPMTQYQDTSK	QLKPRTVATPLNQVAN
EVLNIGKKLYEGKTKE	TLLIKTVETRDGQVIN	SRQAQKVATPLPDPMA
VLNIGKKLYEGKTKEV	MQTIQKTTTRRIVDGK	ANYPSSSRTPQAPASA
GKKLYEGKTKEVYELL	RFPTDYASTSEDEFGS	KKQQISLATQMVRMIL
DELATKLSRRLQMEGE	GETLQMLTTSTTLEKL	CGIADKPMTQYQDTSK
IDDVVNTR________	AAAPVAADTTAAPAAA	TLLIKTVETRDGQVIN
PLDFPSKKRKRSRWNQ	AAGVASLLTTAEVVVT	MQTIQKTTTRRIVDGK
LEENEAGD________	SESVSTTTTTHITKTV	RFPTDYASTSEDEFGS
AGKVTKSAQKAQKAK_	SVQATQLQTTQSVEGA	GETLQMLTTSTTLEKL
PTVIDEVRTGTYRQLF	YRPPGARLTTTRKTPQ	AAAPVAADTTAAPAAA
VKVPQKNS________	PAGIYHRFTVDEKNYT	AAGVASLLTTAEVVVT
EEGFEGGD________	SKRTLLIKTVETRDGQ	SESVSTTTTTHITKTV
QTETKTITYESPQIDG	KKLGELTGTVKESLHE	SVQATQLQTTQSVEGA
EKSLKSLKDKNKKLEE	TTTTHITKTVKGGISE	YRPPGARLTTTRKTPQ
AKTGKFLKRFTDEESR	AASVPKVETVKSDNKD	PAGIYHRFTVDEKNYT
GFGSLGLMTSVLVCPD	TLKMSVQPTVSLGGFE	SKRTLLIKTVETRDGQ
GKIIDRRPERRPPRER	SQGKVLQATVVAVGSG	KKLGELTGTVKESLHE
TTATVLARSIAKEGFE	ELQQEQLQTVVGTYHG	TTTTHITKTVKGGISE
ARSIAKEGFEKISKGA	TVATPLNQVANPNSAI	AASVPKVETVKSDNKD
LSQASAAARNSLYDMA	AVRDMRQTVAVGVIKA	TLKMSVQPTVSLGGFE
DTQFPSLQSTAKHVES	KSSASAPDVDDPEAFP	SQGKVLQATVVAVGSG
DKHIEEVRKNKESKDP	AEDDEDDDVDTKKQKT	ELQQEQLQTVVGTYHG
SPGKVLLQSKDQITAG	TEPPYTAYVGNLPFNT	TVATPLNQVANPNSAI
QERKKVVDTTKESSRK	RDMRQTVAVGVIKAVD	AVRDMRQTVAVGVIKA
TGKEDAANNYARGHYT	MRQTVAVGVIKAVDKK	AEDDEDDDVDTKKQKT
GKEDAANNYARGHYTI	TVETRDGQVINETSQH	TEPPYTAYVGNLPFNT
LLGRVGQDPVLRQVEG	GFGEISSPVIREAEVT	RDMRQTVAVGVIKAVD
IMNQEKLAKLQAQVRI	FPLATYAPVISAEKAY	AQLSPQLTVHQPTEQP
QEKLAKLQAQVRIGGK	VYKKEKARVITEEEKN	MRQTVAVGVIKAVDKK
QVINETSQHHDDLE__	MKKVGRKGVITVKDGK	TVETRDGQVINETSQH
VDKVTGRFNGQFKTYA	TSRSIIRNVKGPVREG	GFGEISSPVIREAEVT
GQFKTYAICGAIRRMG	SSMSGYDQVLQENSSD	FPLATYAPVISAEKAY
LKEALTYDGALLGDRS	NMNAPVPPVNEPETLK	VYKKEKARVITEEEKN
PKEEESPV________	MASLSLAPVNIFKAGA	MKKVGRKGVITVKDGK
TYAEQSYEGYEGYYSQ	SAEPSQLEVPATEEIK	SSMSGYDQVLQENSSD
DYDGIGSRGDRSGFGK	YPPLGRFAVRDMRQTV	NMNAPVPPVNEPETLK
KSTNVIVDSGGFDELG	GIIDPTKVVRTALLDA	MASLSLAPVNIFKAGA
GPGTASRPSSSRSYVT	LGGQDQLRVRVTELED	SAEPSQLEVPATEEIK
TASRPSSSRSYVTTST	VRSIQEAPVSEDLVIR	YPPLGRFAVRDMRQTV
QAKARPENKQHKQTLS	IRYVERSYVSKPTLKE	GIIDPTKVVRTALLDA
NEHQLSLRTVSLGAGA	RAQRFGLNVSSISRKS	LGGQDQLRVRVTELED
SLRTVSLGAGAKDELH	PKSGPSVPVSVQTKDD	VRSIQEAPVSEDLVIR
GGLGGGLGNVLGGLIS	DVAGKPNEVTKAAESP	IRYVERSYVSKPTLKE
EKKISSIQSIVPALEI	RDLPTIPGVTSPSSDE	RAQRFGLNVSSISRKS
GRDSGPPTKKIRSSPR	SAFATPFLVVRHQLLK	VLNAERLEVSVDGLTL
RDSGPPTKKIRSSPRE	KGIIDPTKVVRTALLD	PKSGPSVPVSVQTKDD
DSGPPTKKIRSSPREA	DDDLGSSNWEAADLGN	DVAGKPNEVTKAAESP
SGPPTKKIRSSPREAK	LAPHLTRAYAKDVKFG	RDLPTIPGVTSPSSDE
GPPTKKIRSSPREAKN	NTQPIPILYEHQLGQA	SAFATPFLVVRHQLLK
SESTPIAETIMASSNE	HGIDPTGTYHGDSDLQ	KGIIDPTKVVRTALLD
INEELESQYQQSMDSK	TVGAGAYAYKTMKEDE	DDDLGSSNWEAADLGN
GKNVIGLQMGTNRGAS	RHDMRVHPYQRIVTAD	LAPHLTRAYAKDVKFG
VRKNKMASNIFGTPEE	IGYMGQTAYQYPPPPP	NTQPIPILYEHQLGQA
SLPFCVGSKKSISHYH	GDPRAIVEYRDLDAPD	HGIDPTGTYHGDSDLQ
AEGAGDAK________	VRNRKVVDYSQFQESD	TVGAGAYAYKTMKEDE
KQKTDEDD________	AGSGTPREEEGPAGEA	RHDMRVHPYQRIVTAD
DILGKYVD________	ENLKKTPKKKMKMVTG	IGYMGQTAYQYPPPPP
QDVEDENQ________	NTDESNHDPQFEPIVS	GDPRAIVEYRDLDAPD
KVKKERDS________	NHDPQFEPIVSLPEQE	VRNRKVVDYSQFQESD
SDSNLHDA________	VDTPSGTNSGAGKKRF	AGSGTPREEEGPAGEA
ESVDNEGE________	DMGFGLFD________	ENLKKTPKKKMKMVTG
GEKEAKSD________	EADGARSAVVAAGGGS	NTDESNHDPQFEPIVS
EVVQKEQE________	FAGKVTTASVKERREI	NHDPQFEPIVSLPEQE
SQIQETSI________	DVVATGADPSDLESGG	VDTPSGTNSGAGKKRF
GLAVKELK________	EEAREKMLAAKSADGS	DMGFGLFD________
TSSTRVTKHSTVQHSY	EAREKMLAAKSADGSA	EADGARSAVVAAGGGS
MVGLANLHAMGIAPPK	QQKQEPLGSDSEGVNC	SNGSIGRDPPAETQPQ
KEEIDILSDACSKLQE	GPSLRPQNSTTWRDGG	RFAGKVTTASVKERRE
QKKQEILKKFMDQHPE	LRKESQKDRKNPLPPS	FAGKVTTASVKERREI
APTSSKQHGVNVSVNA	ENWRAFKALIAAQYSG	DVVATGADPSDLESGG
SKQHGVNVSVNASATP	LSAPPHFHFGQTNRTP	EEAREKMLAAKSADGS
DDWNGTRPSLKAPPAR	EIKMEEESGAPGVPSG	EAREKMLAAKSADGSA
SQHHDDLE________	APGVPSGNGAPGPKGE	QQKQEPLGSDSEGVNC
SRQLYVLGHEAMKRLQ	DDLIKLHPESKDDKHG	GPSLRPQNSTTWRDGG
AQSAGTVRSAAPPQEK	RGLQDVLRTNLGPKGT	LRKESQKDRKNPLPPS
PEKTQESL________	HHEEEIVHHKKEIERL	LSAPPHFHFGQTNRTP
NVADSPRNKKEKSS__	HEEEIVHHKKEIERLQ	APGVPSGNGAPGPKGE
GMTGYGMPRQIL____	EIQKDVQTYYGQVLKR	DDLIKLHPESKDDKHG
DKKAAGAGKVTKSAQK	QKDVQTYYGQVLKRSA	RGLQDVLRTNLGPKGT
TVKDGKTLNDELEIIE	KDVQTYYGQVLKRSAD	HHEEEIVHHKKEIERL
VKDGKTLNDELEIIEG	TYYGQVLKRSADLQTN	HEEEIVHHKKEIERLQ
DSVDFSLADAINTEFK	VQHVQAAQQIQAAEIP	EIQKDVQTYYGQVLKR
TEDSIRDYEDGMEVDT	QAAQQIQAAEIPEEHI	QKDVQTYYGQVLKRSA
NIAGSRTAAALAPASL	PEEHIPHQQIQAQLVA	KDVQTYYGQVLKRSAD
LSVAEITNACFEPANQ	QIQAQLVAGQSLAGGQ	TYYGQVLKRSADLQTN
GDSDLQLERINVYYNE	AQLVAGQSLAGGQQIQ	VQHVQAAQQIQAAEIP
GDSDLQLDRISVYYNE	RSTAPSAAASASASAA	QAAQQIQAAEIPEEHI
PADETEAD________	ARPATSTLNRFSALQQ	PEEHIPHQQIQAQLVA
PKMQTDKPFDQTTISL	AAAVPSSGSGVGGGGT	HQQIQAQLVAGQSLAG
QGLLSQLQGQSKDMPP	SQAVEEMRSRVVLGEF	QIQAQLVAGQSLAGGQ
DQASNILASFGLSARD	EMRSRVVLGEFGVRNV	AQLVAGQSLAGGQQIQ
LVKSTLGPKGMDKILL	SRVVLGEFGVRNVHTT	RSTAPSAAASASASAA
SSGLPNRLPPGAVPPG	GPMDKKEE________	ARPATSTLNRFSALQQ
IKDFLLTARRKDAKSV	KENVQPLRQGRIMSTL	AAAVPSSGSGVGGGGT
IEVNVELRKAKKDDQM	NVQPLRQGRIMSTLQG	SQAVEEMRSRVVLGEF
INISGNGF________	AAVKTLNPKAEVARAQ	EMRSRVVLGEFGVRNV
TEFSDIPRRAPKKPLT	VKTLNPKAEVARAQAA	SRVVLGEFGVRNVHTT
TEDTEAKKRKRAERFG	KTLNPKAEVARAQAAL	GPMDKKEE________
AEKSRGLFSANDWQCK	TLNPKAEVARAQAALA	KENVQPLRQGRIMSTL
PFEVKVNRQKFQILGR	LNPKAEVARAQAALAV	NVQPLRQGRIMSTLQG
DENEHQLSLRTVSLGA	AALAVNISAARGLQDV	AAVKTLNPKAEVARAQ
QESSEEEQ________	ASRMEEVD________	KTLNPKAEVARAQAAL
IGEELAIHNRGKEGYI	EEDRSKLRSVSVDLNV	TLNPKAEVARAQAALA
EDKTFGLKNKKGAKQQ	SEPKLSKNELKRRLKA	AALAVNISAARGLQDV
KKFVEEQHTKKSEAAV	KNELKRRLKAEKKVAE	ASRMEEVD________
TIMNQEKLAKLQAQVR	GRTVIIEQSWGSPKVT	EEDRSKLRSVSVDLNV
YDFSTDYV________	AAGGPGGPGGPGMGNR	SEPKLSKNELKRRLKA
VTKSAQKAQKAK____	KKDENKLSSANGHEER	GRTVIIEQSWGSPKVT
GDELRTEPEAKKSKTA	KDENKLSSANGHEERS	AAGGPGGPGGPGMGNR
PTAPSPAQTLENSEPA	ENKLSSANGHEERSKK	KKDENKLSSANGHEER
AAIVDMVPGKPMCVES	ALRRQRLAELQAKHGD	KDENKLSSANGHEERS
IHATTYIPLMDNADSS	RQRLAELQAKHGDPGD	ENKLSSANGHEERSKK
GAAKEEPKRRSARLSA	PVKTKTVSSSNGGESS	ALRRQRLAELQAKHGD
AAKEEPKRRSARLSAK	DSVEAAKNASNTEKLT	RQRLAELQAKHGDPGD
GTPPTAANYPSSSRTP	EAAKNASNTEKLTDQV	PVKTKTVSSSNGGESS
LAKLNQVARQQSHFAM	KLKARQLTVQMMQNPQ	EAAKNASNTEKLTDQV
LNQVARQQSHFAMMHG	ERAYQKQPTIFQNKKR	AKNASNTEKLTDQVMQ
NQVARQQSHFAMMHGG	SLDELIRKRGAAAKGR	EKLTDQVMQNPRVLAA
ARQQSHFAMMHGGTGF	ELIRKRGAAAKGRLNA	KLKARQLTVQMMQNPQ
VLENQKSSHSQYN___	LIRKRGAAAKGRLNAR	ERAYQKQPTIFQNKKR
KSSHSQYN________	IRKRGAAAKGRLNARP	SLDELIRKRGAAAKGR
EEIKETDGSSQIKQEP	LDDIIKLNRSQRGGRG	ELIRKRGAAAKGRLNA
SQIKQEPDPTW_____	NEERKQKFLRLMGAGK	LIRKRGAAAKGRLNAR
KQEPDPTW________	EERKQKFLRLMGAGKK	IRKRGAAAKGRLNARP
LGDGPKLVRELFRVAE	ERKQKFLRLMGAGKKE	LDDIIKLNRSQRGGRG
SGEGLLGLSPGPNGHS	QKFLRLMGAGKKEHTG	NEERKQKFLRLMGAGK
GQVINETSQHHDDLE_	EKLDNQRLKNFKNKGR	EERKQKFLRLMGAGKK
AAMKAKTE________	KLDNQRLKNFKNKGRD	ERKQKFLRLMGAGKKE
EIPKEEKDPGMGAMGG	QRLKNFKNKGRDLETM	QKFLRLMGAGKKEHTG
KLAGGQVE________	AASTAPISFGFTRTSA	EKLDNQRLKNFKNKGR
DSLIKGKK________	SLQYEYKANSNLVLQA	QRLKNFKNKGRDLETM
ADAVAVTMGPKGRTVI	ANSNLVLQADRSLIDR	LTAASTAPISFGFTRT
QTVVGTYHGSPDQSHQ	GETVGKTDYIPLLDVD	AASTAPISFGFTRTSA
SHQVTGNHQQPPQQNT	VGKTDYIPLLDVDEKT	SLQYEYKANSNLVLQA
PVQATQNKTGKYVPPS	KTDYIPLLDVDEKTGN	ANSNLVLQADRSLIDR
ATNLPGRGQLQKLASE	EVLEERQKRLPYVPEP	GETVGKTDYIPLLDVD
LYRIGDLQAFQGHGAG	DMETKIKNYKTAPFDS	VGKTDYIPLLDVDEKT
LTEIKPLLNDKNGTRN	METKIKNYKTAPFDSR	KTDYIPLLDVDEKTGN
EEERAQRPRLQLKPRT	ETKIKNYKTAPFDSRF	EVLEERQKRLPYVPEP
RAQRPRLQLKPRTVAT	GQLVGVDLNTGEPMVA	METKIKNYKTAPFDSR
PDIAVGTKRGSDELFS	LSVAEITNACFEPANQ	ETKIKNYKTAPFDSRF
KTGALLLQGFIQDRAG	VQRTLLEK________	GQLVGVDLNTGEPMVA
VSNPRGRPSRGRPPKL	QKLINPVKTSRNHQDL	LSVAEITNACFEPANQ
SRVQPIKLARVTKVLG	KSSLNSSPWSGLMALG	VQRTLLEK________
RFVVTAPPARNRSKTA	AEQVALSRTQVCGILR	QKLINPVKTSRNHQDL
FGGPGTASRPSSSRSY	QVALSRTQVCGILREE	KSSLNSSPWSGLMALG
PGTASRPSSSRSYVTT	WDTVTVLRKKGPTAAQ	AEQVALSRTQVCGILR
MKETIMNQEKLAKLQA	TVLRKKGPTAAQAKSK	QVALSRTQVCGILREE
LEKQNHTPRKHHQHHH	TEERSLDNFFAKRDKK	WDTVTVLRKKGPTAAQ
MREIVHLQAGQCGNQI	EERSLDNFFAKRDKKK	TVLRKKGPTAAQAKSK
REIVHLQAGQCGNQIG	DNFFAKRDKKKKKERS	TEERSLDNFFAKRDKK
SDFQSNIA________	FFAKRDKKKKKERSNR	EERSLDNFFAKRDKKK
ANGGLALASIEDQGAA	FNGQFKTYAICGAIRR	DNFFAKRDKKKKKERS
FANYIDKVRFLEQQNK	GGMGGGMF________	FFAKRDKKKKKERSNR
ANSRQQIRKLIKDGLI	AQKAQKAK________	FNGQFKTYAICGAIRR
DTPTSAGPNSFNKGKH	ASEKESVM________	GGMGGGMF________
SSVCNILNDYGSQDSI	GLGLEFQA________	AQKAQKAK________
VIDKQDKD________	GLALELEA________	ASEKESVM________
DTYGQQWK________	SGSSKGGPLQALTRES	GLGLEFQA________
ITSTRSLNYKSTSSGH	SKGGPLQALTRESTRG	GLALELEA________
STRSLNYKSTSSGHRE	WLDGIRKWYYNAAGFN	SGSSKGGPLQALTRES
AVQSGKKKKKQKMVRA	FEDADVDH________	SKGGPLQALTRESTRG
PQQVAQQQ________	EAAQKVGAVAAATS__	WLDGIRKWYYNAAGFN
SDPFEVLKAAENKKKE	GAVAAATS________	FEDADVDH________
ESQFEMDI________	APAIESVD________	EAAQKVGAVAAATS__
RKAGPAKEQEPMPTVD	SATGVPTV________	GAVAAATS________
LLQDDISSSYTTTTTI	NLESMDTS________	APAIESVD________
QDDISSSYTTTTTITA	LTKLHQLAMQQSHFPM	SATGVPTV________
ISSSYTTTTTITAPPS	LHQLAMQQSHFPMTHG	FKNTRTNEKVELQELN
SSYTTTTTITAPPSRV	NLADSRTPAAAAAMNL	LTKLHQLAMQQSHFPM
SYTTTTTITAPPSRVL	DGIVSKNF________	LHQLAMQQSHFPMTHG
QNGGDKLETMPLYLED	KFGADARALMLQGVDL	DGIVSKNF________
PDVHIMQHHVLPIQAR	FGADARALMLQGVDLL	KFGADARALMLQGVDL
PEAFPALA________	ADARALMLQGVDLLAD	FGADARALMLQGVDLL
PRSGATAGAAGGRGKG	DARALMLQGVDLLADA	ADARALMLQGVDLLAD
GAAGGRGKGAYQDRDK	LMLQGVDLLADAVAVT	DARALMLQGVDLLADA
FSNSHNALKLRFPAED	QGVDLLADAVAVTMGP	LMLQGVDLLADAVAVT
LKLRFPAEDEFPDLSA	KTHEDIEAQIREIQGK	KTHEDIEAQIREIQGK
PGHLQEGFGCVVTNRF	EAQIREIQGKKAALDE	EAQIREIQGKKAALDE
EVIEKPQA________	AQIREIQGKKAALDEA	AQIREIQGKKAALDEA
GDEKDVSV________	SKEEETKK________	SKEEETKK________
VPRASVPDGFLSELTQ	DKYKNIGAKLVQDVAN	KPKAAKPKKAAAKKK_
EAEQGGAE________	DTQQKVKLADIQIEQL	DKYKNIGAKLVQDVAN
SKNAEVTGTMSQDTEV	EERADATNVNNWHWTE	DTQQKVKLADIQIEQL
AASPDPTT________	RADATNVNNWHWTERD	EERADATNVNNWHWTE
EIKDFLLTARRKDAKS	ALEIANAHRKPLVIIA	RADATNVNNWHWTERD
AGPDKNLVTGDHIPTP	ELSDLARDPPAQCSAG	ALEIANAHRKPLVIIA
DKNLVTGDHIPTPQDL	KKLNFDQA________	ELSDLARDPPAQCSAG
VLTSGTGSQAQPQPAA	KEDAEEKQ________	KKLNFDQA________
GTGSQAQPQPAANQAL	DVPAPSTSADKVESLD	KEDAEEKQ________
STSSHNLQSIFNIGSR	VTERVLAPASTLQSSY	DVPAPSTSADKVESLD
FEPYLSPQARPNNAYT	NFGDLGRPGRGGRGGR	VTERVLAPASTLQSSY
QARPNNAYTAMSDSYL	FGDLGRPGRGGRGGRG	TFIAIKPDGVQRGLVG
ADRAATGN________	TFIAIKPDGVQRGLVG	QKIEKQYDADLEQILI
IKAVDKKAAGAGKVTK	QKIEKQYDADLEQILI	PFEVKVNRQKFQILGR
AIFGGARPREEVVQKE	PFEVKVNRQKFQILGR	FEVKVNRQKFQILGRK
LTASQEAL________	GAVATKVRRHDMRVHP	GAVATKVRRHDMRVHP
KIKSVGGACVLVA___	DRVGQTIERMGSGVER	DRVGQTIERMGSGVER
ENIRFCRQYLVFHDGD	EDLLLQDFSRNLSAKS	EDLLLQDFSRNLSAKS
ELDDRADALQAGASQF	PGGPHSYH________	PGGPHSYH________
DDRADALQAGASQFET	EQRSTQTRRYPSSISS	EQRSTQTRRYPSSISS
ENDNGTVRCEMPELVQ	GGALGHHV________	GGALGHHV________
EDGEPQQKRAHTEEPQ	AVIQHRPSRQYATLDV	AVIQHRPSRQYATLDV
TTEDTEAKKRKRAERF	VIQHRPSRQYATLDVY	VIQHRPSRQYATLDVY
EDTEAKKRKRAERFGI	QHRPSRQYATLDVYNP	QHRPSRQYATLDVYNP
EEAAGASPAKANGQEN	GAASEAGRAMHLMKKR	GAASEAGRAMHLMKKR
EAAGASPAKANGQENG	EVVQKEQE________	EVVQKEQE________
GASPAKANGQENGHVK	HEQILVLDPPTDLKFK	HEQILVLDPPTDLKFK
ASPAKANGQENGHVKS	TAILKQKNRPNRLIVD	TAILKQKNRPNRLIVD
AKANGQENGHVKSNGD	GGGGKIRTRRCHQGPI	GGGGKIRTRRCHQGPI
KANGQENGHVKSNGDL	GGGKIRTRRCHQGPIK	GGGKIRTRRCHQGPIK
ETSKKWAAGQNKQHSI	LAAKKGLDPYNVLAPK	LAAKKGLDPYNVLAPK
SISVQVNSIKFDSE__	VSDGVIKVFNDMKVRK	VSDGVIKVFNDMKVRK
ASSQTDLSQTISKKTV	VFNDMKVRKSSTPEEV	VFNDMKVRKSSTPEEV
AEEEYVGPRLSRRILQ	IKEQNRELRGTQRAII	IKEQNRELRGTQRAII
EGAAKEEPKRRSARLS	KEQNRELRGTQRAIIR	KEQNRELRGTQRAIIR
DDAYLNSPWADNTALK	EQNRELRGTQRAIIRD	EQNRELRGTQRAIIRD
WADNTALKRHFHGVKD	EERAETARLTSFIGAI	EERAETARLTSFIGAI
GSGGFHLAQQASASGS	RAETARLTSFIGAIAI	RAETARLTSFIGAIAI
EDSKLKGGKAPRVATS	AETARLTSFIGAIAIG	AETARLTSFIGAIAIG
EEGGGGAP________	ARLTSFIGAIAIGDLV	ARLTSFIGAIAIGDLV
NAIEAVDEFAFLEGTL	DYTQQATQSYGAYPTQ	DYTQQATQSYGAYPTQ
EDTVTNGS________	TQQATQSYGAYPTQPG	TQQATQSYGAYPTQPG
DDSLIGGNASAEGPEG	QQATQSYGAYPTQPGQ	QQATQSYGAYPTQPGQ
YSQAGITETEWTSGSS	EILLTELQGDSRSLPF	EILLTELQGDSRSLPF
EEEKNFKAFASLRMAR	VKELEKRASGQAFELI	VKELEKRASGQAFELI
SDNDDDTHVRMDFARR	KELEKRASGQAFELIL	ELEKRASGQAFELILS
ITVVKGIRLSENVIDR	ELEKRASGQAFELILS	LEKRASGQAFELILSP
TPPAKKLNFDQA____	LEKRASGQAFELILSP	EKRASGQAFELILSPR
SPGGVYATRSSAVRLR	EKRASGQAFELILSPR	KRASGQAFELILSPRS
SQASRVLGQSSSKPAA	KRASGQAFELILSPRS	RASGQAFELILSPRSK
TSSTQSLARLGSPDYG	RASGQAFELILSPRSK	SGQAFELILSPRSKES
EQRPKGQGNKVQNGSV	SGQAFELILSPRSKES	GQAFELILSPRSKESV
QRPKGQGNKVQNGSVH	GQAFELILSPRSKESV	EIETLDDY________
RPKGQGNKVQNGSVHQ	EIETLDDY________	DSKRGEAPFAQRIDPT
KGQGNKVQNGSVHQKD	DSKRGEAPFAQRIDPT	REKLTPEQLHSMRQAE
GQGNKVQNGSVHQKDG	REKLTPEQLHSMRQAE	SVLVLIVGLSTVGAGA
GNKVQNGSVHQKDGLN	SVLVLIVGLSTVGAGA	VYATRSSAVRLRSSVP
VFQTTDTKSKRK____	VYATRSSAVRLRSSVP	PEGDGLLEYSTFNFWR
KVQNGSLHQKDTVHDN	GEEAEEEA________	RTRRKVLSRAVAAATY
TSSEITTKDLKEKKEV	EEAEEEVA________	GEEAEEEA________
SSEITTKDLKEKKEVV	EVLNIGKKLYEGKTKE	EVLNIGKKLYEGKTKE
EITTKDLKEKKEVVEE	GKKLYEGKTKEVYELL	GKKLYEGKTKEVYELL
TTKDLKEKKEVVEEAE	DELATKLSRRLQMEGE	DELATKLSRRLQMEGE
EKKEVVEEAENGRDAP	TPEQPGLNGAAAAAAG	TPEQPGLNGAAAAAAG
KEVVEEAENGRDAPAN	KVKADTNGIIKTSTTA	KVKADTNGIIKTSTTA
EEAENGRDAPANGNAE	IDDVVNTR________	IDDVVNTR________
NGRDAPANGNAENEEN	PLDFPSKKRKRSRWNQ	PLDFPSKKRKRSRWNQ
GRDAPANGNAENEENG	QLKALGVD________	QLKALGVD________
RDAPANGNAENEENGE	AAVSHWQQQSYLDSGI	AAVSHWQQQSYLDSGI
DDSILRLAKADGIVSK	AVSHWQQQSYLDSGIH	AVSHWQQQSYLDSGIH
ILRLAKADGIVSKNF_	PAEDKKKD________	PAEDKKKD________
KADGIVSKNF______	LEENEAGD________	LEENEAGD________
EHSPAKTSAVSNTKPG	KKQSKPVTTPEEIAQV	KKQSKPVTTPEEIAQV
HSPAKTSAVSNTKPGQ	AGKVTKSAQKAQKAK_	AGKVTKSAQKAQKAK_
PAKTSAVSNTKPGQPP	TYVRDKPHVNVGTIGH	TYVRDKPHVNVGTIGH
AKTSAVSNTKPGQPPQ	PTVIDEVRTGTYRQLF	PTVIDEVRTGTYRQLF
KTQIVSNT________	AAGAGKVTKSAQKAQK	AAGAGKVTKSAQKAQK
ERQLNENKQERDKENR	ELKKQSKPVTTPEEIA	ELKKQSKPVTTPEEIA
KELVLDNSRSNEGKLE	KTESHHKAKGK_____	KTESHHKAKGK_____
SGTQDIQPGPLFNNNA	SHHKAKGK________	SHHKAKGK________
VSRAGTTSRQRHFDTY	VKVPQKNS________	VKVPQKNS________
GIRDHESL________	EEGFEGGD________	EEGFEGGD________
KDGTEKRGRGRPRKQP	QTETKTITYESPQIDG	QTETKTITYESPQIDG
AEKAPVKKKAAKKAGG	EEEAIQLDGLNASQIR	EEEAIQLDGLNASQIR
APVKKKAAKKAGGTPR	EKSLKSLKDKNKKLEE	EKSLKSLKDKNKKLEE
KKAAKKAGGTPRKASG	KDKNKKLEEGGPVYSP	KDKNKKLEEGGPVYSP
PAEKTPVKKKARKSAG	AKTGKFLKRFTDEESR	AKTGKFLKRFTDEESR
AEKTPVKKKARKSAGA	MDFREPTEEERAQRPR	MDFREPTEEERAQRPR
KTPVKKKARKSAGAAK	GFGSLGLMTSVLVCPD	GFGSLGLMTSVLVCPD
QQYQDATAEEEGEFEE	KDEPQRRSARLSAKPA	FGDLGRPGRGGRGGRG
LLHNNGHNGYPNGTSA	DILGKYVD________	KDEPQRRSARLSAKPA
IEADFRLNDSHKHKDK	FKRSRNTDEMVELRIL	DILGKYVD________
ESTFRQNPRIVNHWAS	GKIIDRRPERRPPRER	FKRSRNTDEMVELRIL
KVPDFSEYRRLEVLDS	TTATVLARSIAKEGFE	GKIIDRRPERRPPRER
ALGLDQQFAGLDLNSS	ARSIAKEGFEKISKGA	DVAAFNKI________
QFAGLDLNSSDNQSGG	KREKPKSLRTTAPSHA	TTATVLARSIAKEGFE
QNDPLKDSYGMSPCNT	DRRKEEKE________	ARSIAKEGFEKISKGA
SRGNPTVEVDLFTSKG	LEREIMLAAKKGLDPY	KREKPKSLRTTAPSHA
SEDDEKLKKRKERFGI	LSQASAAARNSLYDMA	DRRKEEKE________
VHSGALND________	ARNSLYDMARYEREQY	EIKDFLLTARRKDAKS
FIQTQQLHAAMADTFL	DKHIEEVRKNKESKDP	LEREIMLAAKKGLDPY
ELDAQLDAYNARMDTS	QERKKVVDTTKESSRK	LSQASAAARNSLYDMA
AQLDAYNARMDTS___	KKVVDTTKESSRKGWE	ARNSLYDMARYEREQY
YNARMDTS________	FIQRGGPE________	DKHIEEVRKNKESKDP
SRDSQGHGRDLSAAGI	TGKEDAANNYARGHYT	HIEEVRKNKESKDPAD
SQGHGRDLSAAGIGLL	GKEDAANNYARGHYTI	SPGKVLLQSKDQITAG
GHGRDLSAAGIGLLAA	GNVHDQDN________	QERKKVVDTTKESSRK
LLAAATQSLSMPASLG	LLGRVGQDPVLRQVEG	KKVVDTTKESSRKGWE
AAATQSLSMPASLGRM	LEAGDKKPDAK_____	FIQRGGPE________
NNNNPQTSAVRTPTQT	IMNQEKLAKLQAQVRI	TGKEDAANNYARGHYT
VRTPTQTNGSNVPFKP	QEKLAKLQAQVRIGGK	GKEDAANNYARGHYTI
PLSDPAPF________	QVINETSQHHDDLE__	GNVHDQDN________
NEGEDYAE________	VDKVTGRFNGQFKTYA	LLGRVGQDPVLRQVEG
EEEEEHPSKTSTKKLK	NGQFKTYAICGAIRRM	LEAGDKKPDAK_____
KVDKVIQAQTAFSANP	LKEALTYDGALLGDRS	IMNQEKLAKLQAQVRI
VIQAQTAFSANPANPA	KQEPDPTW________	QEKLAKLQAQVRIGGK
SLGSALRPSTSRSLYA	PKEEESPV________	QVINETSQHHDDLE__
LEAGDKKPDAK_____	DYDGIGSRGDRSGFGK	VDKVTGRFNGQFKTYA
LKQTPLSR________	TEQPVRKNKMASNIFG	TGRFNGQFKTYAICGA
NLRETNLDSLPLVDTH	KSTNVIVDSGGFDELG	NGQFKTYAICGAIRRM
QIVAPKGS________	AIHSPQVAGVPRFRFG	GQFKTYAICGAIRRMG
EIDDSVLGQTGPYRRP	GPGTASRPSSSRSYVT	LKEALTYDGALLGDRS
WESPKQIKKKKKARRE	PGTASRPSSSRSYVTT	KQEPDPTW________
FLDSGRKTRSARRRTT	TASRPSSSRSYVTTST	PKEEESPV________
SGRKTRSARRRTTQII	QAKARPENKQHKQTLS	DYDGIGSRGDRSGFGK
ETNLDSLPLVDTHSKR	GEVDMESHRNANAEPA	TEQPVRKNKMASNIFG
DSLPLVDTHSKRTLLI	EVDMESHRNANAEPAV	KSTNVIVDSGGFDELG
HQELAKAQSGLAFQQT	NEHQLSLRTVSLGAGA	AIHSPQVAGVPRFRFG
KAQSGLAFQQTSNTQP	GGLGGGLGNVLGGLIS	GPGTASRPSSSRSYVT
TAVFGTVSATPSSSLP	GRDSGPPTKKIRSSPR	PGTASRPSSSRSYVTT
QESFAEHRSGLVPQQI	RDSGPPTKKIRSSPRE	TASRPSSSRSYVTTST
SFAEHRSGLVPQQIKV	DSGPPTKKIRSSPREA	QAKARPENKQHKQTLS
EDIKAKMQASIEKGGS	SGPPTKKIRSSPREAK	GEVDMESHRNANAEPA
VPGVRLLQDSVDFSLA	GPPTKKIRSSPREAKN	EVDMESHRNANAEPAV
RLLQDSVDFSLADAIN	SSPREAKNKRRSGKNS	NEHQLSLRTVSLGAGA
MGLSSQNGQLRGPVKP	GHGRDLSAAGIGLLAA	SLRTVSLGAGAKDELH
GSKLIRKAKEAPFVPV	INEELESQYQQSMDSK	GGLGGGLGNVLGGLIS
NTPAARLHRFKNKGKD	IGLQMGTNRGASQAGM	EKKISSIQSIVPALEI
KVETVKSDNKDDDIDI	NRGASQAGMTGYGMPR	GRDSGPPTKKIRSSPR
DWNGTRPSLKAPPARP	VRKNKMASNIFGTPEE	RDSGPPTKKIRSSPRE
SSKGGPLQALTRESTR	SLPFCVGSKKSISHYH	DSGPPTKKIRSSPREA
ALTRESTRGSRRTPRK	APNKRRRY________	SGPPTKKIRSSPREAK
NLADSRTPAAAAAMNL	HTGRLVIGDHKSTSHF	GPPTKKIRSSPREAKN
HSQLEHLQSKYIGTGH	YGMPRQIL________	SSPREAKNKRRSGKNS
AKDVTLLKETERASPI	AEGAGDAK________	GHGRDLSAAGIGLLAA
LRIDDLIKLHPESKDD	AAEDDEDDDVDTKKQK	SESTPIAETIMASSNE
TNEKVELQELNDRFAN	KQKTDEDD________	INEELESQYQQSMDSK
TTISSQKI________	DRRRRDKFRRERSDYD	IGLQMGTNRGASQAGM
ATTVTSNMSSNQDPPP	EREARRLR________	NRGASQAGMTGYGMPR
SGIESSSPEVKGYWGL	QDVEDENQ________	VRKNKMASNIFGTPEE
LSEAEAQALLSGDTQT	KVKKERDS________	SLPFCVGSKKSISHYH
EAEAQALLSGDTQTDA	SDSNLHDA________	APNKRRRY________
VEGSLIVEKIMQSSSE	ESVDNEGE________	HTGRLVIGDHKSTSHF
ITELADWLVLIDQMLK	GEKEAKSD________	YGMPRQIL________
QEKRSEIS________	AGLQVLNDYLADKSYI	AEGAGDAK________
VVSVVTPGCNQLPTLE	KGYWASLDASTQTTHE	KQKTDEDD________
KEVVIVSATRTPIGSF	SQASAAARNSLYDMAR	DRRRRDKFRRERSDYD
KTVETRDGQVINETSQ	SQIQETSI________	SEREARRLR_______
KETIEQEKRSEIS___	QLYWSHPRKFGQGSRS	EREARRLR________
IEQEKRSEIS______	GLAVKELK________	QDVEDENQ________
DKEKAEKLKQSLPPGL	TSSTRVTKHSTVQHSY	KVKKERDS________
TETSYVTGSTMPPTTV	MVGLANLHAMGIAPPK	SDSNLHDA________
DTSKYNVRHLMPQ___	KEEIDILSDACSKLQE	ESVDNEGE________
FGSNRNSPKHTRLRTS	QKKQEILKKFMDQHPE	GEKEAKSD________
VAESEFTH________	QGLLSQLQGQSKDMPP	AGLQVLNDYLADKSYI
KKDSSQLGTDATKEKP	GSRNMGGPYGGGNYGP	KGYWASLDASTQTTHE
KSDSPSTSSIPPLNET	APTSSKQHGVNVSVNA	SQASAAARNSLYDMAR
GVDPNSRNSSRVLRPP	SKQHGVNVSVNASATP	SQIQETSI________
DPNSRNSSRVLRPPGG	KLPEMDID________	QLYWSHPRKFGQGSRS
EVSKSDLGRKIKEGVE	DDWNGTRPSLKAPPAR	GLAVKELK________
GISETRIEKRIVITGD	SQHHDDLE________	TSSTRVTKHSTVQHSY
DDIDIDAI________	QQREARVQ________	MVGLANLHAMGIAPPK
ITPPVVLRLKCGSGPV	SRQLYVLGHEAMKRLQ	KEEIDILSDACSKLQE
KGLAAAEPTANGGLAL	AQSAGTVRSAAPPQEK	QKKQEILKKFMDQHPE
VAVGVIKAVDKKAAGA	PEKTQESL________	QGLLSQLQGQSKDMPP
EVQKHSVHTLVFRSLK	NVADSPRNKKEKSS__	GSRNMGGPYGGGNYGP
GNLPFNTVQGDIDAIF	DNSTISLQMGTNKVAS	APTSSKQHGVNVSVNA
GVIKAVDKKAAGAGKV	GMTGYGMPRQIL____	SKQHGVNVSVNASATP
KAVDKKAAGAGKVTKS	DKKAAGAGKVTKSAQK	KLPEMDID________
AVDKKAAGAGKVTKSA	TVKDGKTLNDELEIIE	DDWNGTRPSLKAPPAR
VDKKAAGAGKVTKSAQ	VKDGKTLNDELEIIEG	SQHHDDLE________
AAGAGKVTKSAQKAQK	DSVDFSLADAINTEFK	QQREARVQ________
EAEVTRTARKQSAQKR	SVDFSLADAINTEFKN	SRQLYVLGHEAMKRLQ
AEKAYHEQLSVAEITN	YYSQSQGDSEYYDYGH	AQSAGTVRSAAPPQEK
KDGKTLNDELEIIEGM	NIAGSRTAAALAPASL	PEKTQESL________
MIARVADGLPLAASMQ	VDGLPDLGHAQDLMDG	NVADSPRNKKEKSS__
ETLKQQNQYQASYNQS	GDSDLQLERINVYYNE	DNSTISLQMGTNKVAS
KETDGSSQIKQEPDPT	PTGTYHGDSDLQLERI	GMTGYGMPRQIL____
LEDEVRNLRKINRDLF	GDSDLQLDRISVYYNE	DKKAAGAGKVTKSAQK
SEDLVIRLRRPPLRYP	NTFFSETGAGKHVPRA	TVKDGKTLNDELEIIE
IVSATRTPIGSFLGSL	PADETEAD________	VKDGKTLNDELEIIEG
TKDDVYEAFMKEMEGL	PKMQTDKPFDQTTISL	DSVDFSLADAINTEFK
LIDTHLLQARANLTQA	DQASNILASFGLSARD	NIAGSRTAAALAPASL
APDDVDFF________	DQEERIMEFSAPLPLE	VDGLPDLGHAQDLMDG
NA	SSGLPNRLPPGAVPPG	GDSDLQLERINVYYNE
NA	IKDFLLTARRKDAKSV	PTGTYHGDSDLQLERI
NA	IEVNVELRKAKKDDQM	GDSDLQLDRISVYYNE
NA	INISGNGF________	NTFFSETGAGKHVPRA
NA	TEFSDIPRRAPKKPLT	PADETEAD________
NA	TTEDTEAKKRKRAERF	PKMQTDKPFDQTTISL
NA	TEDTEAKKRKRAERFG	DQASNILASFGLSARD
NA	IGKTLAEKSRGLFSAN	DQEERIMEFSAPLPLE
NA	TLAEKSRGLFSANDWQ	LVKSTLGPKGMDKILL
NA	AEKSRGLFSANDWQCK	SSGLPNRLPPGAVPPG
NA	GEEEGEEY________	IEVNVELRKAKKDDQM
NA	DENEHQLSLRTVSLGA	INISGNGF________
NA	RQEQIAKRRRLSSLRA	TEFSDIPRRAPKKPLT
NA	QESSEEEQ________	TTEDTEAKKRKRAERF
NA	IGEELAIHNRGKEGYI	TEDTEAKKRKRAERFG
NA	EDKTFGLKNKKGAKQQ	IGKTLAEKSRGLFSAN
NA	DKTFGLKNKKGAKQQK	TLAEKSRGLFSANDWQ
NA	KKFVEEQHTKKSEAAV	AEKSRGLFSANDWQCK
NA	TIMNQEKLAKLQAQVR	GEEEGEEY________
NA	HLNVQVSNFKSGKGDS	DENEHQLSLRTVSLGA
NA	FMNTSSLRRNRR____	RQEQIAKRRRLSSLRA
NA	YDFSTDYV________	QESSEEEQ________
NA	VTKSAQKAQKAK____	IGEELAIHNRGKEGYI
NA	TKSAQKAQKAK_____	EDKTFGLKNKKGAKQQ
NA	GDELRTEPEAKKSKTA	DKTFGLKNKKGAKQQK
NA	ADEISLRPAQSFLMNK	KKFVEEQHTKKSEAAV
NA	SVKEETKEDAEEKQ__	TIMNQEKLAKLQAQVR
NA	VHSGALND________	HLNVQVSNFKSGKGDS
NA	VDDERKLRTFYEKRMA	FMNTSSLRRNRR____
NA	PTAPSPAQTLENSEPA	KDFLLTARRKDAKSVK
NA	KKWAAGQNKQHSITKN	YDFSTDYV________
NA	EQDVEKKK________	VTKSAQKAQKAK____
NA	EQMEQMKQRIAEENIM	TKSAQKAQKAK_____
NA	GGAVFDHPAKIAKSTK	GDELRTEPEAKKSKTA
NA	SESTPIAETIMASSNE	ADEISLRPAQSFLMNK
NA	AAIVDMVPGKPMCVES	SVKEETKEDAEEKQ__
NA	KYKNIGAKLVQDVANN	VHSGALND________
NA	SEEDVSSRYSRTDRSG	VDDERKLRTFYEKRMA
NA	IHATTYIPLMDNADSS	KKWAAGQNKQHSITKN
NA	SPGKVLLQSKDQITAG	EQDVEKKK________
NA	NDSSNLDPSQAPSLAQ	EQMEQMKQRIAEENIM
NA	GAAKEEPKRRSARLSA	AAIVDMVPGKPMCVES
NA	AAKEEPKRRSARLSAK	KYKNIGAKLVQDVANN
NA	GTPPTAANYPSSSRTP	SEEDVSSRYSRTDRSG
NA	LAKLNQVARQQSHFAM	IHATTYIPLMDNADSS
NA	LNQVARQQSHFAMMHG	NDSSNLDPSQAPSLAQ
NA	NQVARQQSHFAMMHGG	GAAKEEPKRRSARLSA
NA	ARQQSHFAMMHGGTGF	AAKEEPKRRSARLSAK
NA	VLENQKSSHSQYN___	LAKLNQVARQQSHFAM
NA	KSSHSQYN________	LNQVARQQSHFAMMHG
NA	EEIKETDGSSQIKQEP	NQVARQQSHFAMMHGG
NA	SQIKQEPDPTW_____	ARQQSHFAMMHGGTGF
NA	LGDGPKLVRELFRVAE	VLENQKSSHSQYN___
NA	GSGEGLLGLSPGPNGH	KSSHSQYN________
NA	KERELELKNTWSENKL	LGDGPKLVRELFRVAE
NA	GQVINETSQHHDDLE_	GSGEGLLGLSPGPNGH
NA	AAMKAKTE________	SGEGLLGLSPGPNGHS
NA	DKGKNVRQRNSS____	KERELELKNTWSENKL
NA	TMPIADPQPLD_____	GQVINETSQHHDDLE_
NA	KEHYQVLE________	AAMKAKTE________
NA	EIPKEEKDPGMGAMGG	DKGKNVRQRNSS____
NA	KEEIERIHREVAFNKT	KEHYQVLE________
NA	SEDDEKLKKRKERFGI	EIPKEEKDPGMGAMGG
NA	KKKQEEKKTKFENLCK	KEEIERIHREVAFNKT
NA	KLAGGQVE________	SEDDEKLKKRKERFGI
NA	DSLIKGKK________	KKKQEEKKTKFENLCK
NA	ADAVAVTMGPKGRTVI	KLAGGQVE________
NA	QTVVGTYHGSPDQSHQ	DSLIKGKK________
NA	SHQVTGNHQQPPQQNT	ADAVAVTMGPKGRTVI
NA	EKDKHIEEVRKNKESK	QTVVGTYHGSPDQSHQ
NA	HIEEVRKNKESKDPAD	SHQVTGNHQQPPQQNT
NA	DSEKNESRRNLELPRL	EKDKHIEEVRKNKESK
NA	PVQATQNKTGKYVPPS	DSEKNESRRNLELPRL
NA	ATNLPGRGQLQKLASE	PVQATQNKTGKYVPPS
NA	KEKAEKLKQSLPPGLA	ATNLPGRGQLQKLASE
NA	LYRIGDLQAFQGHGAG	KEKAEKLKQSLPPGLA
NA	EEERAQRPRLQLKPRT	LYRIGDLQAFQGHGAG
NA	EERAQRPRLQLKPRTV	LTEIKPLLNDKNGTRN
NA	PDIAVGTKRGSDELFS	EEERAQRPRLQLKPRT
NA	KTGALLLQGFIQDRAG	EERAQRPRLQLKPRTV
NA	ERRQQVLDRYHRFKEL	PDIAVGTKRGSDELFS
NA	EAEVTRTARKQSAQKR	KTGALLLQGFIQDRAG
NA	VSNPRGRPSRGRPPKL	ESTRRILGLAIESQDA
NA	SRVQPIKLARVTKVLG	ERRQQVLDRYHRFKEL
NA	ASIANIVKSSLGPVGL	EAEVTRTARKQSAQKR
NA	QVARTHLTEDTPKVNA	VSNPRGRPSRGRPPKL
NA	NEKINAEKSSKQKVDL	SNPRGRPSRGRPPKLQ
NA	RFVVTAPPARNRSKTA	SRVQPIKLARVTKVLG
NA	GGASRFSASSGGGGSR	ASIANIVKSSLGPVGL
NA	SDSSPAVENEHPQETP	QVARTHLTEDTPKVNA
NA	FGGPGTASRPSSSRSY	NEKINAEKSSKQKVDL
NA	LVGSDQAPGRDKNIPA	RFVVTAPPARNRSKTA
NA	KNIPAGLQSMNQALQR	GGASRFSASSGGGGSR
NA	MKETIMNQEKLAKLQA	AGNSEFLGKTPGQNAQ
NA	LEKQNHTPRKHHQHHH	SQRRAELRRRKLLMNS
NA	KQNHTPRKHHQHHHQQ	SDSSPAVENEHPQETP
NA	MREIVHLQAGQCGNQI	FGGPGTASRPSSSRSY
NA	SDFQSNIA________	LVGSDQAPGRDKNIPA
NA	STSSHNLQSIFNIGSR	KNIPAGLQSMNQALQR
NA	DTSKYNVRHLMPQ___	GLELTELQNMTVPEDD
NA	ANGGLALASIEDQGAA	MKETIMNQEKLAKLQA
NA	FANYIDKVRFLEQQNK	LEKQNHTPRKHHQHHH
NA	ANSRQQIRKLIKDGLI	KQNHTPRKHHQHHHQQ
NA	SDAMKKVGRKGVITVK	MREIVHLQAGQCGNQI
NA	DTPTSAGPNSFNKGKH	REIVHLQAGQCGNQIG
NA	VIDKQDKD________	SDFQSNIA________
NA	DTYGQQWK________	STSSHNLQSIFNIGSR
NA	ITSTRSLNYKSTSSGH	SGIESSSPEVKGYWGL
NA	STRSLNYKSTSSGHRE	DTSKYNVRHLMPQ___
NA	AVQSGKKKKKQKMVRA	ANGGLALASIEDQGAA
NA	PQQVAQQQ________	HAVSIAQDDAGADDWE
NA	SDPFEVLKAAENKKKE	FANYIDKVRFLEQQNK
NA	NDAPHKNTQEKFSLSQ	ANSRQQIRKLIKDGLI
NA	ESQFEMDI________	SDAMKKVGRKGVITVK
NA	KGYWGLDASAQTTSHE	DTPTSAGPNSFNKGKH
NA	SDQTKEKE________	SSVCNILNDYGSQDSI
NA	SRIPAASAAAMNLASA	DAQFEMDI________
NA	RKAGPAKEQEPMPTVD	VIDKQDKD________
NA	LLQDDISSSYTTTTTI	DTYGQQWK________
NA	QDDISSSYTTTTTITA	ITSTRSLNYKSTSSGH
NA	DISSSYTTTTTITAPP	STRSLNYKSTSSGHRE
NA	ISSSYTTTTTITAPPS	AVQSGKKKKKQKMVRA
NA	SSYTTTTTITAPPSRV	PQQVAQQQ________
NA	SYTTTTTITAPPSRVL	SDPFEVLKAAENKKKE
NA	YTTTTTITAPPSRVLQ	NDAPHKNTQEKFSLSQ
NA	PPSRVLQNGGDKLETM	GEWKALKRKKFKK___
NA	GDKLETMPLYLEDDIR	ESQFEMDI________
NA	KLETMPLYLEDDIRPD	KGYWGLDASAQTTSHE
NA	PDVHIMQHHVLPIQAR	SDQTKEKE________
NA	PEAFPALA________	SRIPAASAAAMNLASA
NA	PRSGATAGAAGGRGKG	RKAGPAKEQEPMPTVD
NA	GAAGGRGKGAYQDRDK	LLQDDISSSYTTTTTI
NA	AAGGRGKGAYQDRDKP	QDDISSSYTTTTTITA
NA	AGGRGKGAYQDRDKPA	DISSSYTTTTTITAPP
NA	QIRFSNISAAKAVADA	SSYTTTTTITAPPSRV
NA	NEDFRKLLMTPRAAPT	SYTTTTTITAPPSRVL
NA	SDWSIHLR________	YTTTTTITAPPSRVLQ
NA	FSNSHNALKLRFPAED	PPSRVLQNGGDKLETM
NA	LKLRFPAEDEFPDLSA	QNGGDKLETMPLYLED
NA	MPEQTGEK________	KLETMPLYLEDDIRPD
NA	PGHLQEGFGCVVTNRF	PDVHIMQHHVLPIQAR
NA	EVIEKPQA________	PEAFPALA________
NA	GDEKDVSV________	PRSGATAGAAGGRGKG
NA	FGGARPREEVVQKEQE	GAAGGRGKGAYQDRDK
NA	PDEKTKKRIFQIHTSR	AAGGRGKGAYQDRDKP
NA	VPRASVPDGFLSELTQ	AGGRGKGAYQDRDKPA
NA	EAEQGGAE________	QIRFSNISAAKAVADA
NA	SKNAEVTGTMSQDTEV	DSEPFSNPLAPDGHDV
NA	WIKFKSVS________	NEDFRKLLMTPRAAPT
NA	AASPDPTT________	SDWSIHLR________
NA	PPPPPPPPPPPPAGGT	FSNSHNALKLRFPAED
NA	APDDVDFF________	LKLRFPAEDEFPDLSA
NA	KIEEIKDFLLTARRKD	MPEQTGEK________
NA	EEIKDFLLTARRKDAK	PGHLQEGFGCVVTNRF
NA	EIKDFLLTARRKDAKS	EVIEKPQA________
NA	AGPDKNLVTGDHIPTP	GDEKDVSV________
NA	DKNLVTGDHIPTPQDL	FGGARPREEVVQKEQE
NA	HYKSAVKA________	PDEKTKKRIFQIHTSR
NA	TSRMEEVD________	VPRASVPDGFLSELTQ
NA	LTTTPRRRPRAMDFF_	EAEQGGAE________
NA	PEPEPVKEEKLSPEPI	SKNAEVTGTMSQDTEV
NA	VLTSGTGSQAQPQPAA	WIKFKSVS________
NA	GTGSQAQPQPAANQAL	AASPDPTT________
NA	FEPYLSPQARPNNAYT	PPPPPPPPPPPPAGGT
NA	QARPNNAYTAMSDSYL	APDDVDFF________
NA	KSNIDKKFSAHYDAVE	KIEEIKDFLLTARRKD
NA	ADRAATGN________	EEIKDFLLTARRKDAK
NA	VIKAVDKKAAGAGKVT	IKDFLLTARRKDAKSV
NA	AIFGGARPREEVVQKE	AGPDKNLVTGDHIPTP
NA	KIKSVGGACVLVA___	DKNLVTGDHIPTPQDL
NA	DTDKFKGFCYVEFDEV	HYKSAVKA________
NA	ENIRFCRQYLVFHDGD	TSRMEEVD________
NA	ELDDRADALQAGASQF	LTTTPRRRPRAMDFF_
NA	DDRADALQAGASQFET	PEPEPVKEEKLSPEPI
NA	EHSSDPYHSGYEMPYA	VLTSGTGSQAQPQPAA
NA	ENDNGTVRCEMPELVQ	FEPYLSPQARPNNAYT
NA	REIVHLQAGQCGNQIG	PQARPNNAYTAMSDSY
NA	EDGEPQQKRAHTEEPQ	QARPNNAYTAMSDSYL
NA	EVLKAAENKKKEAGGG	KSNIDKKFSAHYDAVE
NA	LEAAKRLNAKEIVLKA	ADRAATGN________
NA	EDTEAKKRKRAERFGI	VIKAVDKKAAGAGKVT
NA	EEAAGASPAKANGQEN	AIFGGARPREEVVQKE
NA	EAAGASPAKANGQENG	LTASQEAL________
NA	GASPAKANGQENGHVK	KIKSVGGACVLVA___
NA	ASPAKANGQENGHVKS	DTDKFKGFCYVEFDEV
NA	AKANGQENGHVKSNGD	ENIRFCRQYLVFHDGD
NA	KANGQENGHVKSNGDL	ELDDRADALQAGASQF
NA	ETSKKWAAGQNKQHSI	DDRADALQAGASQFET
NA	SISVQVNSIKFDSE__	EHSSDPYHSGYEMPYA
NA	ASSQTDLSQTISKKTV	ENDNGTVRCEMPELVQ
NA	AEEEYVGPRLSRRILQ	EDGEPQQKRAHTEEPQ
NA	AKVKDEPQRRSARLSA	EVLKAAENKKKEAGGG
NA	AKSVKIKKNKDNVKFK	LEAAKRLNAKEIVLKA
NA	PEKPVKKQKTGETSRA	EDTEAKKRKRAERFGI
NA	EGAAKEEPKRRSARLS	EEAAGASPAKANGQEN
NA	DDAYLNSPWADNTALK	EAAGASPAKANGQENG
NA	WADNTALKRHFHGVKD	GASPAKANGQENGHVK
NA	GSGGFHLAQQASASGS	ASPAKANGQENGHVKS
NA	EDSKLKGGKAPRVATS	AKANGQENGHVKSNGD
NA	KHIEEVRKNKESKDPA	KANGQENGHVKSNGDL
NA	VTVELRKNKRDEHLLK	ETSKKWAAGQNKQHSI
NA	VVVELRKNKRDEHLLK	SISVQVNSIKFDSE__
NA	EEGGGGAP________	ASSQTDLSQTISKKTV
NA	GVIKAVDKKAAGAGKV	AEEEYVGPRLSRRILQ
NA	AVDKKAAGAGKVTKSA	AKVKDEPQRRSARLSA
NA	NAIEAVDEFAFLEGTL	PEKPVKKQKTGETSRA
NA	TVHDDVLELEMDELNR	EGAAKEEPKRRSARLS
NA	DSDEDDDY________	DDAYLNSPWADNTALK
NA	EQDSEEVRLKLEETRE	WADNTALKRHFHGVKD
NA	EEEIEVDSRVADNSFD	GSGGFHLAQQASASGS
NA	SKSSQKESAVQRSKSC	EDSKLKGGKAPRVATS
NA	EDTVTNGS________	KHIEEVRKNKESKDPA
NA	TEHLVTKSRLPLRAQI	VTVELRKNKRDEHLLK
NA	NKVSEQLQAKMPMKKE	VVVELRKNKRDEHLLK
NA	DDSLIGGNASAEGPEG	EEGGGGAP________
NA	KKINEELESQYQQSMD	GVIKAVDKKAAGAGKV
NA	DGWTTVRR________	AVDKKAAGAGKVTKSA
NA	LVDQDTTSFDSAWGQE	NAIEAVDEFAFLEGTL
NA	KTVETRDGQVINETSQ	TVHDDVLELEMDELNR
NA	PIPYEFMA________	DSDEDDDY________
NA	QAGITETEWTSGSSKG	EQDSEEVRLKLEETRE
NA	EEEKNFKAFASLRMAR	EEEIEVDSRVADNSFD
NA	SDNDDDTHVRMDFARR	SKSSQKESAVQRSKSC
NA	ITVVKGIRLSENVIDR	FTGFGKKARTFDLEAM
NA	TPPAKKLNFDQA____	EDTVTNGS________
NA	PPAKKLNFDQA_____	TEHLVTKSRLPLRAQI
NA	SPGGVYATRSSAVRLR	NKVSEQLQAKMPMKKE
NA	VAIKAMAK________	DDSLIGGNASAEGPEG
NA	TSSTQSLARLGSPDYG	KKINEELESQYQQSMD
NA	EQRPKGQGNKVQNGSV	DGWTTVRR________
NA	QRPKGQGNKVQNGSVH	LVDQDTTSFDSAWGQE
NA	RPKGQGNKVQNGSVHQ	KTVETRDGQVINETSQ
NA	KGQGNKVQNGSVHQKD	PIPYEFMA________
NA	GQGNKVQNGSVHQKDG	QAGITETEWTSGSSKG
NA	GNKVQNGSVHQKDGLN	EEEKNFKAFASLRMAR
NA	VFQTTDTKSKRK____	ITVVKGIRLSENVIDR
NA	KVQNGSLHQKDTVHDN	TPPAKKLNFDQA____
NA	SSEITTKDLKEKKEVV	SPGGVYATRSSAVRLR
NA	EITTKDLKEKKEVVEE	VAIKAMAK________
NA	KEKKEVVEEAENGRDA	SQASRVLGQSSSKPAA
NA	EKKEVVEEAENGRDAP	TSSTQSLARLGSPDYG
NA	KEVVEEAENGRDAPAN	EQRPKGQGNKVQNGSV
NA	EEAENGRDAPANGNAE	RPKGQGNKVQNGSVHQ
NA	NGRDAPANGNAENEEN	KGQGNKVQNGSVHQKD
NA	GRDAPANGNAENEENG	GQGNKVQNGSVHQKDG
NA	RDAPANGNAENEENGE	GNKVQNGSVHQKDGLN
NA	ILRLAKADGIVSKNF_	VFQTTDTKSKRK____
NA	KADGIVSKNF______	KVQNGSLHQKDTVHDN
NA	EHSPAKTSAVSNTKPG	TSSEITTKDLKEKKEV
NA	HSPAKTSAVSNTKPGQ	SSEITTKDLKEKKEVV
NA	PAKTSAVSNTKPGQPP	EITTKDLKEKKEVVEE
NA	AKTSAVSNTKPGQPPQ	TTKDLKEKKEVVEEAE
NA	KTQIVSNT________	KEKKEVVEEAENGRDA
NA	ERQLNENKQERDKENR	EKKEVVEEAENGRDAP
NA	STQDAKKS________	KEVVEEAENGRDAPAN
NA	GKDPLSANHSLKPLPS	EVVEEAENGRDAPANG
NA	SGTQDIQPGPLFNNNA	EEAENGRDAPANGNAE
NA	VSRAGTTSRQRHFDTY	NGRDAPANGNAENEEN
NA	KGRAQPYDPNFYDETY	GRDAPANGNAENEENG
NA	KDGTEKRGRGRPRKQP	RDAPANGNAENEENGE
NA	PAEKAPVKKKAAKKAG	ILRLAKADGIVSKNF_
NA	AEKAPVKKKAAKKAGG	KADGIVSKNF______
NA	APVKKKAAKKAGGTPR	HSPAKTSAVSNTKPGQ
NA	KKAAKKAGGTPRKASG	PAKTSAVSNTKPGQPP
NA	PAEKTPVKKKARKSAG	AKTSAVSNTKPGQPPQ
NA	AEKTPVKKKARKSAGA	KTQIVSNT________
NA	KTPVKKKARKSAGAAK	EAATGEDASSPPPKTE
NA	QQYQDATAEEEGEFEE	ERQLNENKQERDKENR
NA	LLHNNGHNGYPNGTSA	KQERDKENRHRKRSHS
NA	IEADFRLNDSHKHKDK	STQDAKKS________
NA	EEDVKLLSISGKRSAP	EKGVGGNNGGNGNGGG
NA	AVRRPLVASVGLNVPA	VGGNNGGNGNGGGAFS
NA	ESTFRQNPRIVNHWAS	KELVLDNSRSNEGKLE
NA	KVPDFSEYRRLEVLDS	SGTQDIQPGPLFNNNA
NA	LSSAAKSGTEKKKEKP	AMVAATQGAAAAAGSG
NA	VENALGLDQQFAGLDL	VSRAGTTSRQRHFDTY
NA	ALGLDQQFAGLDLNSS	GIRDHESL________
NA	QFAGLDLNSSDNQSGG	KGRAQPYDPNFYDETY
NA	SIASVLLQTREMGEAK	KDGTEKRGRGRPRKQP
NA	SRGNPTVEVDLFTSKG	PAEKAPVKKKAAKKAG
NA	AKADGIVSKNF_____	AEKAPVKKKAAKKAGG
NA	EDDEKLKKRKERFGIV	APVKKKAAKKAGGTPR
NA	FIQTQQLHAAMADTFL	KKAAKKAGGTPRKASG
NA	ELDAQLDAYNARMDTS	PAEKTPVKKKARKSAG
NA	AQLDAYNARMDTS___	AEKTPVKKKARKSAGA
NA	YNARMDTS________	KTPVKKKARKSAGAAK
NA	SRDSQGHGRDLSAAGI	QQYQDATAEEEGEFEE
NA	SQGHGRDLSAAGIGLL	LLHNNGHNGYPNGTSA
NA	AGIGLLAAATQSLSMP	IEADFRLNDSHKHKDK
NA	LLAAATQSLSMPASLG	AVRRPLVASVGLNVPA
NA	LAAATQSLSMPASLGR	ESTFRQNPRIVNHWAS
NA	AAATQSLSMPASLGRM	ENSSDFQSNIA_____
NA	NNNNPQTSAVRTPTQT	KVPDFSEYRRLEVLDS
NA	VRTPTQTNGSNVPFKP	LSSAAKSGTEKKKEKP
NA	PTQTNGSNVPFKPRGR	VENALGLDQQFAGLDL
NA	PLSDPAPF________	ALGLDQQFAGLDLNSS
NA	NEGEDYAE________	QFAGLDLNSSDNQSGG
NA	EEEEEHPSKTSTKKLK	SIASVLLQTREMGEAK
NA	KVDKVIQAQTAFSANP	QNDPLKDSYGMSPCNT
NA	VIQAQTAFSANPANPA	SRGNPTVEVDLFTSKG
NA	EQPVRKNKMASNIFGT	AKADGIVSKNF_____
NA	SLGSALRPSTSRSLYA	EDDEKLKKRKERFGIV
NA	GDKKPDAK________	EAGTAFIQTQQLHAAM
NA	LKQTPLSR________	FIQTQQLHAAMADTFL
NA	KTEGWSKNFKLLQSQL	ELDAQLDAYNARMDTS
NA	SKNFKLLQSQLQVKKA	AQLDAYNARMDTS___
NA	VKKAALTQAKSQRTKQ	YNARMDTS________
NA	QIVAPKGS________	SRDSQGHGRDLSAAGI
NA	EYFQKVNQ________	SQGHGRDLSAAGIGLL
NA	TRTQEGSLSARWPVAG	AGIGLLAAATQSLSMP
NA	EIDDSVLGQTGPYRRP	LLAAATQSLSMPASLG
NA	WESPKQIKKKKKARRE	LAAATQSLSMPASLGR
NA	ANSRPLDHAQPPSSLV	AAATQSLSMPASLGRM
NA	ENKLLGKNGTGGLFQG	NNNNPQTSAVRTPTQT
NA	FLDSGRKTRSARRRTT	VRTPTQTNGSNVPFKP
NA	SGRKTRSARRRTTQII	PTQTNGSNVPFKPRGR
NA	ETNLDSLPLVDTHSKR	PLSDPAPF________
NA	DSLPLVDTHSKRTLLI	NEGEDYAE________
NA	HQELAKAQSGLAFQQT	EEEEEHPSKTSTKKLK
NA	KAQSGLAFQQTSNTQP	KVDKVIQAQTAFSANP
NA	TAVFGTVSATPSSSLP	VIQAQTAFSANPANPA
NA	QESFAEHRSGLVPQQI	EQPVRKNKMASNIFGT
NA	SFAEHRSGLVPQQIKV	SLGSALRPSTSRSLYA
NA	LNSEEESDPPTYKDAF	GDKKPDAK________
NA	EDIKAKMQASIEKGGS	LKQTPLSR________
NA	VPGVRLLQDSVDFSLA	KTEGWSKNFKLLQSQL
NA	RLLQDSVDFSLADAIN	VKKAALTQAKSQRTKQ
NA	HVEMGPPDPILGVTEA	QIVAPKGS________
NA	SRKDKEMEKSFEVVRH	PTAPAVNLAGARTPAA
NA	IMGLSSQNGQLRGPVK	EYFQKVNQ________
NA	MGLSSQNGQLRGPVKP	TRTQEGSLSARWPVAG
NA	GSKLIRKAKEAPFVPV	EIDDSVLGQTGPYRRP
NA	NTPAARLHRFKNKGKD	WESPKQIKKKKKARRE
NA	PKKEDALLYQSKGYND	QQTLSHLSQQHHHLPQ
NA	KKEDALLYQSKGYNDD	KATAVMPDGQFKDISL
NA	KVETVKSDNKDDDIDI	FLDSGRKTRSARRRTT
NA	TAGAVPVRNEKGEISM	SGRKTRSARRRTTQII
NA	YKKAVAMSKRYGSDRR	ETNLDSLPLVDTHSKR
NA	DWNGTRPSLKAPPARP	DSLPLVDTHSKRTLLI
NA	SSKGGPLQALTRESTR	HQELAKAQSGLAFQQT
NA	ALTRESTRGSRRTPRK	KAQSGLAFQQTSNTQP
NA	PYTFQPNK________	TAVFGTVSATPSSSLP
NA	HSQLEHLQSKYIGTGH	QESFAEHRSGLVPQQI
NA	QLEHLQSKYIGTGHAD	SFAEHRSGLVPQQIKV
NA	TNEKVELQELNDRFAN	EDIKAKMQASIEKGGS
NA	TTISSQKI________	VPGVRLLQDSVDFSLA
NA	ATTVTSNMSSNQDPPP	RLLQDSVDFSLADAIN
NA	SNMSSNQDPPPAASDQ	HVEMGPPDPILGVTEA
NA	AMSSVGANHQRDARRA	SRKDKEMEKSFEVVRH
NA	SGIESSSPEVKGYWGL	IMGLSSQNGQLRGPVK
NA	LSEAEAQALLSGDTQT	MGLSSQNGQLRGPVKP
NA	EAEAQALLSGDTQTDA	GSKLIRKAKEAPFVPV
NA	VEGSLIVEKIMQSSSE	NTPAARLHRFKNKGKD
NA	SLIVEKIMQSSSEVGY	PKKEDALLYQSKGYND
NA	KEYFSKQK________	KKEDALLYQSKGYNDD
NA	ITELADWLVLIDQMLK	KVETVKSDNKDDDIDI
NA	QEKRSEIS________	YKKAVAMSKRYGSDRR
NA	VVSVVTPGCNQLPTLE	DWNGTRPSLKAPPARP
NA	KEVVIVSATRTPIGSF	WNGTRPSLKAPPARPV
NA	IVSATRTPIGSFLGSL	SSKGGPLQALTRESTR
NA	KETIEQEKRSEIS___	GGPLQALTRESTRGSR
NA	IEQEKRSEIS______	ALTRESTRGSRRTPRK
NA	TPPAFNRAAPGAEFAP	EIRTLAVERLLEPLVT
NA	TETSYVTGSTMPPTTV	NLADSRTPAAAAAMNL
NA	KIDDIRKPGESEE___	HSQLEHLQSKYIGTGH
NA	RKPGESEE________	QLEHLQSKYIGTGHAD
NA	NDTKVLRH________	AKDVTLLKETERASPI
NA	FGSNRNSPKHTRLRTS	TNEKVELQELNDRFAN
NA	VAESEFTH________	TTISSQKI________
NA	KKDSSQLGTDATKEKP	ATTVTSNMSSNQDPPP
NA	GISETRIEKRIVITGD	SNMSSNQDPPPAASDQ
NA	KSDSPSTSSIPPLNET	AMSSVGANHQRDARRA
NA	GVDPNSRNSSRVLRPP	LSEAEAQALLSGDTQT
NA	DPNSRNSSRVLRPPGG	VEGSLIVEKIMQSSSE
NA	EKNYTKAMRLFVGEPV	KEYFSKQK________
NA	KNYTKAMRLFVGEPVW	ITELADWLVLIDQMLK
NA	EVSKSDLGRKIKEGVE	QEKRSEIS________
NA	DDIDIDAI________	VVSVVTPGCNQLPTLE
NA	ITPPVVLRLKCGSGPV	KEVVIVSATRTPIGSF
NA	GEIQPVSVKVGDKVLL	IVSATRTPIGSFLGSL
NA	KGLAAAEPTANGGLAL	KETIEQEKRSEIS___
NA	VAVGVIKAVDKKAAGA	IEQEKRSEIS______
NA	EVQKHSVHTLVFRSLK	DKEKAEKLKQSLPPGL
NA	GNLPFNTVQGDIDAIF	TPPAFNRAAPGAEFAP
NA	KAVDKKAAGAGKVTKS	TETSYVTGSTMPPTTV
NA	VDKKAAGAGKVTKSAQ	KIDDIRKPGESEE___
NA	GKVTKSAQKAQKAK__	RKPGESEE________
NA	AEKAYHEQLSVAEITN	NDTKVLRH________
NA	KDGKTLNDELEIIEGM	FGSNRNSPKHTRLRTS
NA	MIARVADGLPLAASMQ	VAESEFTH________
NA	ETLKQQNQYQASYNQS	KKDSSQLGTDATKEKP
NA	KETDGSSQIKQEPDPT	GISETRIEKRIVITGD
NA	LEDEVRNLRKINRDLF	KSDSPSTSSIPPLNET
NA	SEDLVIRLRRPPLRYP	GVDPNSRNSSRVLRPP
NA	TKDDVYEAFMKEMEGL	DPNSRNSSRVLRPPGG
NA	VRHQLLKT________	EKNYTKAMRLFVGEPV
NA	GNEERKQKFLRLMGAG	KNYTKAMRLFVGEPVW
NA	LIDTHLLQARANLTQA	EVSKSDLGRKIKEGVE
NA	EDEKRYNERISGLGLT	DDIDIDAI________
NA	PPPPPSRK________	ITPPVVLRLKCGSGPV
NA	NA	GEIQPVSVKVGDKVLL
NA	NA	KGLAAAEPTANGGLAL
NA	NA	VAVGVIKAVDKKAAGA
NA	NA	EVQKHSVHTLVFRSLK
NA	NA	GNLPFNTVQGDIDAIF
NA	NA	KAVDKKAAGAGKVTKS
NA	NA	VDKKAAGAGKVTKSAQ
NA	NA	GKVTKSAQKAQKAK__
NA	NA	QVQVQIQGQAPQSAAP
NA	NA	AEKAYHEQLSVAEITN
NA	NA	KDGKTLNDELEIIEGM
NA	NA	MIARVADGLPLAASMQ
NA	NA	ETLKQQNQYQASYNQS
NA	NA	KETDGSSQIKQEPDPT
NA	NA	LEDEVRNLRKINRDLF
NA	NA	SEDLVIRLRRPPLRYP
NA	NA	SVDGLTLSPDPEERPG
NA	NA	TKDDVYEAFMKEMEGL
NA	NA	VRHQLLKT________
NA	NA	LGNEERKQKFLRLMGA
NA	NA	GNEERKQKFLRLMGAG
NA	NA	LIDTHLLQARANLTQA
NA	NA	EDEKRYNERISGLGLT
NA	NA	PPPPPSRK________

## Sheet: MPro_24hrs
Rep_1	Rep_2	Rep_3
DTTAAPAAAAAPAKVE	DTTAAPAAAAAPAKVE	DTTAAPAAAAAPAKVE
KRRALAAPAAEEKEEA	KRRALAAPAAEEKEEA	VASPAKLQAAATLTEV
QQEFVRALAAFLKKSG	QQEFVRALAAFLKKSG	KRRALAAPAAEEKEEA
REEFPTLQAAGDQDKA	REEFPTLQAAGDQDKA	QQEFVRALAAFLKKSG
KSLKFATEAAITILRI	KSLKFATEAAITILRI	REEFPTLQAAGDQDKA
RAQSREQLAALKKHHE	RAQSREQLAALKKHHE	KSLKFATEAAITILRI
SAASRVQSAAPARPGP	SAASRVQSAAPARPGP	RAQSREQLAALKKHHE
SPSPSQLQAAQIQVQH	SPSPSQLQAAQIQVQH	TRNTMSLLAANNLLAG
QIQVQHVQAAQQIQAA	QIQVQHVQAAQQIQAA	APVAADTTAAPAAAAA
AVHPVRDYAAQTSPSP	AVHPVRDYAAQTSPSP	SAASRVQSAAPARPGP
GSGAKPSDAASEAARP	GSGAKPSDAASEAARP	SPSPSQLQAAQIQVQH
LEEHAKLQAAVDGPMD	LEEHAKLQAAVDGPMD	QIQVQHVQAAQQIQAA
MLQGVDLLADAVAVTM	MLQGVDLLADAVAVTM	AVHPVRDYAAQTSPSP
DSILRLAKADGIVSKN	DSILRLAKADGIVSKN	GSGAKPSDAASEAARP
LGSSNWEAADLGNEER	LGSSNWEAADLGNEER	LEEHAKLQAAVDGPMD
VAPSAVNLADPRTPTA	VAPSAVNLADPRTPTA	MLQGVDLLADAVAVTM
FMKAVRKVADSKKLES	FMKAVRKVADSKKLES	DSILRLAKADGIVSKN
RDFIATLEAEAFDDVV	RDFIATLEAEAFDDVV	LGSSNWEAADLGNEER
RRALAAPAAEEKEEAR	RRALAAPAAEEKEEAR	VAPSAVNLADPRTPTA
KAKFFSRRAEEKIKSV	KAKFFSRRAEEKIKSV	FMKAVRKVADSKKLES
DRSLRVDIAEGRKQDK	DRSLRVDIAEGRKQDK	RDFIATLEAEAFDDVV
QETLVKIQAEHSESGQ	QETLVKIQAEHSESGQ	RRALAAPAAEEKEEAR
MESHRNANAEPAVQRT	MESHRNANAEPAVQRT	KAKFFSRRAEEKIKSV
KKLCFKENAEQGEVDM	KKLCFKENAEQGEVDM	DRSLRVDIAEGRKQDK
HASIQMNVAEVDKVTG	HASIQMNVAEVDKVTG	QETLVKIQAEHSESGQ
NRTTPSYVAFTDTERL	NRTTPSYVAFTDTERL	MESHRNANAEPAVQRT
PTAPAVNLAGARTPAA	ESEAENQQAGAAALAP	KKLCFKENAEQGEVDM
TMKMLVSGAGDIKLTK	AVDKKAAGAGKVTKSA	YALKSMTEAEQQQLID
LLDGKNVNAGGHKLGL	SYFTSGLQAGLKQSHL	HASIQMNVAEVDKVTG
SYFTSGLQAGLKQSHL	TPSIPVLTAGQSGLYS	VKGPDGLTAFEATDNQ
TPSIPVLTAGQSGLYS	SVSSQYNMAGVRTEDS	LNGKLTGMAFRVPTAN
SVSSQYNMAGVRTEDS	TSSKRALGAHLEAEPK	NRTTPSYVAFTDTERL
TSSKRALGAHLEAEPK	DEAVAVLQAHQAKEAA	ESEAENQQAGAAALAP
DEAVAVLQAHQAKEAA	PHHATQLHAHQPQPAT	PTAPAVNLAGARTPAA
PHHATQLHAHQPQPAT	QPAMMQPMAHYPSQPV	TMKMLVSGAGDIKLTK
QPAMMQPMAHYPSQPV	SVDFSLADAINTEFKN	LLDGKNVNAGGHKLGL
SVDFSLADAINTEFKN	AYTIQGQYAIPQPDLT	AVDKKAAGAGKVTKSA
AYTIQGQYAIPQPDLT	FKTYAICGAIRRMGES	SYFTSGLQAGLKQSHL
SDDSILRLAKADGIVS	SDDSILRLAKADGIVS	SVSSQYNMAGVRTEDS
APHLTRAYAKDVKFGA	APHLTRAYAKDVKFGA	TSSKRALGAHLEAEPK
AAAPAKVEAKEESEES	AAAPAKVEAKEESEES	DEAVAVLQAHQAKEAA
EWVDTVKLAKHKELAP	EWVDTVKLAKHKELAP	PHHATQLHAHQPQPAT
KDKYKNIGAKLVQDVA	KDKYKNIGAKLVQDVA	SVDFSLADAINTEFKN
VTKDGVTVAKSIDLKD	VTKDGVTVAKSIDLKD	AYTIQGQYAIPQPDLT
LSAHNNHMAKVLTPEL	LSAHNNHMAKVLTPEL	FKTYAICGAIRRMGES
SSIQSIVPALEIANAH	SSIQSIVPALEIANAH	SDDSILRLAKADGIVS
AQSREQLAALKKHHEE	AQSREQLAALKKHHEE	APHLTRAYAKDVKFGA
TRTYSLGSALRPSTSR	QKADVTLSALNDSDAN	AAAPAKVEAKEESEES
EKVAEKLEALSVKEET	TRTYSLGSALRPSTSR	EWVDTVKLAKHKELAP
SSGVQPTLAMPNIAVG	EKVAEKLEALSVKEET	KDKYKNIGAKLVQDVA
QHGKVEIIANDQGNRT	SSGVQPTLAMPNIAVG	VTKDGVTVAKSIDLKD
VATPLNQVANPNSAIF	QHGKVEIIANDQGNRT	LSAHNNHMAKVLTPEL
PVAADTTAAPAAAAAP	DLLMVTYLANLTQSQI	SSIQSIVPALEIANAH
VSAAPGSAAPAAGSAP	VATPLNQVANPNSAIF	AQSREQLAALKKHHEE
AASRVQSAAPARPGPA	PVAADTTAAPAAAAAP	QKADVTLSALNDSDAN
PYEYPYTLAPATSILE	VSAAPGSAAPAAGSAP	TRTYSLGSALRPSTSR
TPPAFNRAAPGAEFAP	AASRVQSAAPARPGPA	EKVAEKLEALSVKEET
GFGLERMAAPIDRVGQ	PYEYPYTLAPATSILE	SSGVQPTLAMPNIAVG
QVPSGPSGAPPMPGGP	TPPAFNRAAPGAEFAP	QHGKVEIIANDQGNRT
KPGMVVTFAPVNVTTE	GFGLERMAAPIDRVGQ	DLLMVTYLANLTQSQI
GPGPGGFGAQGPKGGS	QVPSGPSGAPPMPGGP	VATPLNQVANPNSAIF
TTYTSQNNAQGPLYEQ	GPGPGGFGAQGPKGGS	PVAADTTAAPAAAAAP
PSPSQLQAAQIQVQHV	TTYTSQNNAQGPLYEQ	VSAAPGSAAPAAGSAP
QEMIARMQAQMQMQMQ	PSPSQLQAAQIQVQHV	AASRVQSAAPARPGPA
PNSAIFGGARPREEVV	QEMIARMQAQMQMQMQ	PYEYPYTLAPATSILE
GAAAMRSMASGGGVPT	PNSAIFGGARPREEVV	TPPAFNRAAPGAEFAP
PTIKPSPAASKEYFQK	GAAAMRSMASGGGVPT	GFGLERMAAPIDRVGQ
LYVPRKCSASNRIIGA	PTIKPSPAASKEYFQK	QVPSGPSGAPPMPGGP
AAAAAMNLASPRTAVA	LYVPRKCSASNRIIGA	LSELTQQLAQATGKPP
SSDEPPMEASQSHLRN	AAAAAMNLASPRTAVA	GPGPGGFGAQGPKGGS
TQAGLQLLASSDPPAL	SSDEPPMEASQSHLRN	TTYTSQNNAQGPLYEQ
SLLGFSVNASSERLNM	TQAGLQLLASSDPPAL	PSPSQLQAAQIQVQHV
ELQMTRQMASSGASGG	SLLGFSVNASSERLNM	QEMIARMQAQMQMQMQ
SEYQQYQDATAEEEED	ELQMTRQMASSGASGG	PNSAIFGGARPREEVV
VSVSALTLATETVRSI	SEYQQYQDATAEEEED	GAAAMRSMASGGGVPT
LQLKPRTVATPLNQVA	VSVSALTLATETVRSI	PTIKPSPAASKEYFQK
TPAPTTTTATREEAST	LQLKPRTVATPLNQVA	LYVPRKCSASNRIIGA
EEHAKLQAAVDGPMDK	TPAPTTTTATREEAST	AAAAAMNLASPRTAVA
TVAVGVIKAVDKKAAG	EEHAKLQAAVDGPMDK	SSDEPPMEASQSHLRN
GAGKHVPRAVFVDLEP	TVAVGVIKAVDKKAAG	TQAGLQLLASSDPPAL
KVLQATVVAVGSGSKG	GAGKHVPRAVFVDLEP	SLLGFSVNASSERLNM
VRDMRQTVAVGVIKAV	KVLQATVVAVGSGSKG	ELQMTRQMASSGASGG
ESNAVLTKAVKRPNED	VRDMRQTVAVGVIKAV	SEYQQYQDATAEEEED
GGVLPNIQAVLLPKKT	ESNAVLTKAVKRPNED	VSVSALTLATETVRSI
ARTPAIPTAVNLADSR	GGVLPNIQAVLLPKKT	LQLKPRTVATPLNQVA
HRNANAEPAVQRTLLE	ARTPAIPTAVNLADSR	TPAPTTTTATREEAST
GPSPINMGAVVPQGSR	GPSPINMGAVVPQGSR	EEHAKLQAAVDGPMDK
MAVAGMPTAYDLSSVI	ELGEYGLQAYTEVKTV	TVAVGVIKAVDKKAAG
ELGEYGLQAYTEVKTV	PEIDITCWDADPVPEE	GAGKHVPRAVFVDLEP
PEIDITCWDADPVPEE	EEEEATKEDAEAPGIR	KVLQATVVAVGSGSKG
EEEEATKEDAEAPGIR	AKDVKFGADARALMLQ	VRDMRQTVAVGVIKAV
AKDVKFGADARALMLQ	KTEMVTISDASQRTEI	ESNAVLTKAVKRPNED
KTEMVTISDASQRTEI	KHYRGPAGDATVASEK	GGVLPNIQAVLLPKKT
KHYRGPAGDATVASEK	WHSSRPVRDDSVVEKS	ARTPAIPTAVNLADSR
WHSSRPVRDDSVVEKS	RAAEDDEDDDVDTKKQ	HRNANAEPAVQRTLLE
RAAEDDEDDDVDTKKQ	MFAQVESDDEEAKNEP	GPSPINMGAVVPQGSR
MFAQVESDDEEAKNEP	PPLRGSNMDFREPTEE	ELGEYGLQAYTEVKTV
PPLRGSNMDFREPTEE	RGRSSFYPDGGDQETA	PEIDITCWDADPVPEE
RGRSSFYPDGGDQETA	PPMGSRFRDGPPLRGS	EEEEATKEDAEAPGIR
PPMGSRFRDGPPLRGS	KKAGSGKNDHAEKVAE	AKDVKFGADARALMLQ
KKAGSGKNDHAEKVAE	HHFRKPANDITSQLEI	KTEMVTISDASQRTEI
LPFNTVQGDIDAIFKD	KAEGDAKGDKAKVKDE	KHYRGPAGDATVASEK
HHFRKPANDITSQLEI	DIAEGRKQDKGGFGFR	AIRRMGESDDSILRLA
KAEGDAKGDKAKVKDE	VAKSIDLKDKYKNIGA	WHSSRPVRDDSVVEKS
DIAEGRKQDKGGFGFR	GSSNWEAADLGNEERK	RAAEDDEDDDVDTKKQ
VAKSIDLKDKYKNIGA	ATPEQPVLDLKRPFLS	MFAQVESDDEEAKNEP
HVPRAVFVDLEPTVID	QDSGEVPEDLRLPEGD	TKEMLKLLDFGSLSNL
GSSNWEAADLGNEERK	GQYAIPQPDLTKLHQL	PPLRGSNMDFREPTEE
ATPEQPVLDLKRPFLS	EFGKRPAEDMEEEQAF	RGRSSFYPDGGDQETA
QDSGEVPEDLRLPEGD	NQALKLQLDNQYAVLE	PPMGSRFRDGPPLRGS
GQYAIPQPDLTKLHQL	VEIGLAKDDQLKVHGF	KKAGSGKNDHAEKVAE
EFGKRPAEDMEEEQAF	IRRVGRRPDQQLQGEG	LPFNTVQGDIDAIFKD
NQALKLQLDNQYAVLE	IRRMGESDDSILRLAK	HHFRKPANDITSQLEI
VEIGLAKDDQLKVHGF	CVPVANKRDTRSIEEA	KAEGDAKGDKAKVKDE
IRRVGRRPDQQLQGEG	DKSSASAPDVDDPEAF	DIAEGRKQDKGGFGFR
IRRMGESDDSILRLAK	ELNGKNIEDVIAQGIG	VAKSIDLKDKYKNIGA
CVPVANKRDTRSIEEA	HLTRAYAKDVKFGADA	HVPRAVFVDLEPTVID
DKSSASAPDVDDPEAF	FSKTAAKGEAAAERPG	GSSNWEAADLGNEERK
ELNGKNIEDVIAQGIG	DDLGSSNWEAADLGNE	ATPEQPVLDLKRPFLS
HLTRAYAKDVKFGADA	DFIATLEAEAFDDVVG	QDSGEVPEDLRLPEGD
FSKTAAKGEAAAERPG	AEKVAEKLEALSVKEE	GQYAIPQPDLTKLHQL
DDLGSSNWEAADLGNE	SLGSLQTPEAVTTRKG	EFGKRPAEDMEEEQAF
DFIATLEAEAFDDVVG	ILAAQRRGEDVETSKK	NQALKLQLDNQYAVLE
AEKVAEKLEALSVKEE	LEEQITAFEDYVQSMD	VEIGLAKDDQLKVHGF
SLGSLQTPEAVTTRKG	QDVANNTNEEAGDGTT	IRRVGRRPDQQLQGEG
HGEVQDSYEAYGQDDW	QEEEEEEDEEEEATKE	IRRMGESDDSILRLAK
TEDSIRDYEDGMEVDT	QQYQDATAEEEEDFGE	CVPVANKRDTRSIEEA
ILAAQRRGEDVETSKK	SGGGVPTDEEQATGLE	DKSSASAPDVDDPEAF
LEEQITAFEDYVQSMD	RKHGGPKDEERHVGDL	ELNGKNIEDVIAQGIG
QDVANNTNEEAGDGTT	TVGCVAGDEESYEVFK	HLTRAYAKDVKFGADA
QEEEEEEDEEEEATKE	KLVSQEEMEFIQRGGP	GVEFDFIPDVKGAVLV
QQYQDATAEEEEDFGE	GGASLELLEGKVLPGV	TLEAEAFDDVVGETVG
SGGGVPTDEEQATGLE	TAPVPTVGEGYGYGHE	FSKTAAKGEAAAERPG
RKHGGPKDEERHVGDL	KFWEVISDEHGIDPTG	DDLGSSNWEAADLGNE
TVGCVAGDEESYEVFK	GKGVSKAVEHINKTIA	DFIATLEAEAFDDVVG
KLVSQEEMEFIQRGGP	HGGYKPSDEHKTDLNP	AEKVAEKLEALSVKEE
GGASLELLEGKVLPGV	RKTPQGPPEIYSDTQF	SLGSLQTPEAVTTRKG
TAPVPTVGEGYGYGHE	AAKLERLREKDKHIEE	TEDSIRDYEDGMEVDT
KFWEVISDEHGIDPTG	AREDMAALEKDYEEVG	ILAAQRRGEDVETSKK
GKGVSKAVEHINKTIA	KDGKTLNDELEIIEGM	LEEQITAFEDYVQSMD
HGGYKPSDEHKTDLNP	ASVVKVLTELLEQERK	QDVANNTNEEAGDGTT
SSERLNMGEIETLDDY	RRKLVSQEEMEFIQRG	QEEEEEEDEEEEATKE
RKTPQGPPEIYSDTQF	QKKKLCFKENAEQGEV	QQYQDATAEEEEDFGE
AAKLERLREKDKHIEE	ESHRNANAEPAVQRTL	EERLQAKKEEIIKTLS
AREDMAALEKDYEEVG	YFTTRTYGEPESAGPS	KVGTDLLEEEITKFEE
GMPAFKPGEKVLLSDS	VEKNSTPSEPGSGRGP	SGGGVPTDEEQATGLE
KDGKTLNDELEIIEGM	STLHTQSAEPPPPPEP	RKHGGPKDEERHVGDL
EGKTKEVYELLDSPGK	TYRQLFHPEQLITGKE	TVGCVAGDEESYEVFK
ASVVKVLTELLEQERK	CGAIRRMGESDDSILR	KLVSQEEMEFIQRGGP
RRKLVSQEEMEFIQRG	RGQEPQMKETIMNQEK	GGASLELLEGKVLPGV
QKKKLCFKENAEQGEV	RTLLIKTVETRDGQVI	KFWEVISDEHGIDPTG
ESHRNANAEPAVQRTL	ASIQMNVAEVDKVTGR	GKGVSKAVEHINKTIA
YFTTRTYGEPESAGPS	GFCYVEFDEVDSLKEA	HGGYKPSDEHKTDLNP
VEKNSTPSEPGSGRGP	ESAEPSQLEVPATEEI	RKTPQGPPEIYSDTQF
STLHTQSAEPPPPPEP	PPAPETYEEYGYDDTY	AAKLERLREKDKHIEE
TYRQLFHPEQLITGKE	YSQSQGDSEYYDYGHG	AREDMAALEKDYEEVG
CGAIRRMGESDDSILR	DYGGFTMMFDDRRGRP	KDGKTLNDELEIIEGM
RGQEPQMKETIMNQEK	GGSNFSLGFDEPTEQP	QELRPTLNELGISTPE
RTLLIKTVETRDGQVI	QLIDDHFLFDKPVSPL	EGKTKEVYELLDSPGK
ASIQMNVAEVDKVTGR	NKPQERIPFDRDKDLK	ASVVKVLTELLEQERK
GFCYVEFDEVDSLKEA	LKIHAREIFDSRGNPT	QKKKLCFKENAEQGEV
ESAEPSQLEVPATEEI	PSAGLNVDFESVFGNK	ESHRNANAEPAVQRTL
PPAPETYEEYGYDDTY	GIGGMQQHFFDDEDRT	YFTTRTYGEPESAGPS
YSQSQGDSEYYDYGHG	SSSSYRRMFGGPGTAS	STLHTQSAEPPPPPEP
DYGGFTMMFDDRRGRP	PHFLPDAMFGQPGALG	TYRQLFHPEQLITGKE
IATLEAEAFDDVVGET	AMGFQRRFFHQDQSPV	CGAIRRMGESDDSILR
QLIDDHFLFDKPVSPL	AYQKKKLCFKENAEQG	RGQEPQMKETIMNQEK
NKPQERIPFDRDKDLK	QDSYLGDEFKSQIDVA	RTLLIKTVETRDGQVI
LKIHAREIFDSRGNPT	LKADKDYHFKVDNDEN	ASIQMNVAEVDKVTGR
PSAGLNVDFESVFGNK	EVDKVTGRFNGQFKTY	GFCYVEFDEVDSLKEA
GIGGMQQHFFDDEDRT	TSKGQKCEFQDAYVLL	ESAEPSQLEVPATEEI
SSSSYRRMFGGPGTAS	RKVVDYSQFQESDDAD	KLYEGKTKEVYELLDS
PHFLPDAMFGQPGALG	KRVETSEHFRIDGPVI	AAPTAQATEWVGATTD
AMGFQRRFFHQDQSPV	GDHKSTSHFRTGEEDK	YSQSQGDSEYYDYGHG
AYQKKKLCFKENAEQG	KSKENPRNFSDNQLQE	DYGGFTMMFDDRRGRP
QDSYLGDEFKSQIDVA	NPLPGGRNFSGTASTS	IATLEAEAFDDVVGET
LKADKDYHFKVDNDEN	RPPGGGSNFSLGFDEP	GGSNFSLGFDEPTEQP
EVDKVTGRFNGQFKTY	GKHVPRAVFVDLEPTV	QLIDDHFLFDKPVSPL
TSKGQKCEFQDAYVLL	LMPETTALGAAMAAGA	NKPQERIPFDRDKDLK
RKVVDYSQFQESDDAD	PAFNRAAPGAEFAPNK	LKIHAREIFDSRGNPT
KRVETSEHFRIDGPVI	FNTFFSETGAGKHVPR	PSAGLNVDFESVFGNK
GDHKSTSHFRTGEEDK	KQKFLRLMGAGKKEHT	GIGGMQQHFFDDEDRT
KSKENPRNFSDNQLQE	LKDKYKNIGAKLVQDV	SSSSYRRMFGGPGTAS
NPLPGGRNFSGTASTS	QGPSPINMGAVVPQGS	PHFLPDAMFGQPGALG
RPPGGGSNFSLGFDEP	EGNNPAENGDAKTDQA	AYQKKKLCFKENAEQG
GKHVPRAVFVDLEPTV	EGDGEEEDGDEDEEAE	QDSYLGDEFKSQIDVA
LMPETTALGAAMAAGA	NVKGPVREGDVLTLLE	LKADKDYHFKVDNDEN
DVDLPEVDGADDDSQD	AILAAQRRGEDVETSK	EVDKVTGRFNGQFKTY
PAFNRAAPGAEFAPNK	NVPWAFMQGEIATILA	TSKGQKCEFQDAYVLL
FNTFFSETGAGKHVPR	LGMPAFKPGEKVLLSD	RKVVDYSQFQESDDAD
KQKFLRLMGAGKKEHT	ICGAIRRMGESDDSIL	KRVETSEHFRIDGPVI
LKDKYKNIGAKLVQDV	GGGSNFSLGFDEPTEQ	GDHKSTSHFRTGEEDK
GLQMGTNRGASQAGMT	ANPNSAIFGGARPREE	KSKENPRNFSDNQLQE
QGPSPINMGAVVPQGS	NFGGSRNMGGPYGGGN	RPPGGGSNFSLGFDEP
EGNNPAENGDAKTDQA	QIHDLVLVGGSTRIPK	LMPETTALGAAMAAGA
EGDGEEEDGDEDEEAE	TVGEGYGYGHESELSQ	DVDLPEVDGADDDSQD
NVKGPVREGDVLTLLE	PTSASGLNGHPTLSGG	PAFNRAAPGAEFAPNK
AILAAQRRGEDVETSK	GASLELLEGKVLPGVD	FNTFFSETGAGKHVPR
LGMPAFKPGEKVLLSD	KLKQSLPPGLAVKELK	KQKFLRLMGAGKKEHT
ICGAIRRMGESDDSIL	VPGPLPDFGLEESGHS	LKDKYKNIGAKLVQDV
GGGSNFSLGFDEPTEQ	QAQLALKPGLIGNANM	GLQMGTNRGASQAGMT
ANPNSAIFGGARPREE	KDTAPVLEGLKEEEIT	EGNNPAENGDAKTDQA
QIHDLVLVGGSTRIPK	GGKFMKSQGLSQLYHN	EGDGEEEDGDEDEEAE
TVGEGYGYGHESELSQ	SNYGPMKSGNFGGSRN	NVKGPVREGDVLTLLE
PTSASGLNGHPTLSGG	GLPSTFQYGPAVFPVA	AILAAQRRGEDVETSK
LRPTLNELGISTPEEL	YTSQNNAQGPLYEQRS	NVPWAFMQGEIATILA
GASLELLEGKVLPGVD	EQKNAEQNGPVDGQGD	LGMPAFKPGEKVLLSD
KLKQSLPPGLAVKELK	FGGSRNMGGPYGGGNY	AETKLQNYGELGPGTT
VPGPLPDFGLEESGHS	EVVRHKNRGRDEVSKN	ICGAIRRMGESDDSIL
QAQLALKPGLIGNANM	TTPGRKPRGRPKKLEK	GGGSNFSLGFDEPTEQ
KDTAPVLEGLKEEEIT	RTMQARGFGSDQSENV	ANPNSAIFGGARPREE
GGKFMKSQGLSQLYHN	PTNGMAKNGSEADIDE	YGGGYDNYGGGNYGSG
SNYGPMKSGNFGGSRN	IKIDEPLEGSEDRIIT	NFGGSRNMGGPYGGGN
GLPSTFQYGPAVFPVA	TVIIEQSWGSPKVTKD	QIHDLVLVGGSTRIPK
YTSQNNAQGPLYEQRS	ALSSDFTCGSPTAAGK	TVGEGYGYGHESELSQ
FGGSRNMGGPYGGGNY	ENLKSKVGGTKPAGGD	PTSASGLNGHPTLSGG
EVVRHKNRGRDEVSKN	QTTISLQMGTNKGASQ	LRPTLNELGISTPEEL
TTPGRKPRGRPKKLEK	KNVIGLQMGTNRGASQ	GASLELLEGKVLPGVD
RTMQARGFGSDQSENV	NTNEEAGDGTTTATVL	KLKQSLPPGLAVKELK
TVIIEQSWGSPKVTKD	DMRQTVAVGVIKAVDK	VPGPLPDFGLEESGHS
ALSSDFTCGSPTAAGK	AMKKVGRKGVITVKDG	QAQLALKPGLIGNANM
ENLKSKVGGTKPAGGD	DKQRYLGKGVLKAVDH	KDTAPVLEGLKEEEIT
QTTISLQMGTNKGASQ	VRLRSSVPGVRLLQDS	GGKFMKSQGLSQLYHN
KNVIGLQMGTNRGASQ	AGGTRGSNHARIDAAE	SNYGPMKSGNFGGSRN
NTNEEAGDGTTTATVL	NLVGPRSAHATAPVNI	GLPSTFQYGPAVFPVA
DMRQTVAVGVIKAVDK	FLVEPISCHAWNKDRT	YTSQNNAQGPLYEQRS
AMKKVGRKGVITVKDG	DNQSFQYDHEAFLGKE	EQKNAEQNGPVDGQGD
DKQRYLGKGVLKAVDH	VISAEKAYHEQLSVAE	FGGSRNMGGPYGGGNY
VRLRSSVPGVRLLQDS	TAYNRPADHFEARGQY	EVVRHKNRGRDEVSKN
AGGTRGSNHARIDAAE	GIDPTGTYHGDSDLQL	TTPGRKPRGRPKKLEK
NLVGPRSAHATAPVNI	FWEVISDEHGIDPTGT	RTMQARGFGSDQSENV
FLVEPISCHAWNKDRT	CWELYCLEHGIQPDGQ	PTNGMAKNGSEADIDE
DNQSFQYDHEAFLGKE	EQLAALKKHHEEEIVH	IKIDEPLEGSEDRIIT
VISAEKAYHEQLSVAE	ERLREKDKHIEEVRKN	TVIIEQSWGSPKVTKD
TAYNRPADHFEARGQY	MTAYGTRRHLYDPKMQ	ALSSDFTCGSPTAAGK
GIDPTGTYHGDSDLQL	ACNGTVIEHPEYGEVI	ENLKSKVGGTKPAGGD
FWEVISDEHGIDPTGT	VPASVCYSHTDIKVPD	QTTISLQMGTNKGASQ
EQLAALKKHHEEEIVH	TTSVVRRSHYEEGPGK	KNVIGLQMGTNRGASQ
ERLREKDKHIEEVRKN	EEGNPLLKHYRGPAGD	DMRQTVAVGVIKAVDK
MTAYGTRRHLYDPKMQ	RSGFPRALIDPSSGLP	AMKKVGRKGVITVKDG
SQGLSQLYHNQSQGLL	GLERMAAPIDRVGQTI	DKQRYLGKGVLKAVDH
TTSVVRRSHYEEGPGK	PATGCQKLIEVDDERK	VRLRSSVPGVRLLQDS
EEGNPLLKHYRGPAGD	STEMRRRRIEVNVELR	AGGTRGSNHARIDAAE
RSGFPRALIDPSSGLP	NMCSIHLLIFYRQILG	NLVGPRSAHATAPVNI
GLERMAAPIDRVGQTI	AFTDTERLIGDAAKNQ	FLVEPISCHAWNKDRT
ANKRDTRSIEEAMNEI	ATMEGIGAIGGTPPAF	DNQSFQYDHEAFLGKE
PATGCQKLIEVDDERK	MGPKGRTVIIEQSWGS	VISAEKAYHEQLSVAE
STEMRRRRIEVNVELR	THSKRTLLIKTVETRD	TAYNRPADHFEARGQY
NMCSIHLLIFYRQILG	LATETVRSILKIDDVV	GIDPTGTYHGDSDLQL
AFTDTERLIGDAAKNQ	QEPQMKETIMNQEKLA	FWEVISDEHGIDPTGT
ATMEGIGAIGGTPPAF	MKHWPFQVINDGDKPK	CWELYCLEHGIQPDGQ
MGPKGRTVIIEQSWGS	MQVADLQSINISGNGF	EQLAALKKHHEEEIVH
THSKRTLLIKTVETRD	YTIQGQYAIPQPDLTK	ERLREKDKHIEEVRKN
LATETVRSILKIDDVV	NDYLQIETIQALEELA	MTAYGTRRHLYDPKMQ
QEPQMKETIMNQEKLA	YSIQGQHTISPLDLAK	ACNGTVIEHPEYGEVI
MKHWPFQVINDGDKPK	KHASPILPITEFSDIP	TTSVVRRSHYEEGPGK
MQVADLQSINISGNGF	NQSYSQAGITETEWTS	EEGNPLLKHYRGPAGD
YTIQGQYAIPQPDLTK	KKRKERFGIVTSSAGT	RSGFPRALIDPSSGLP
NDYLQIETIQALEELA	GVIKAVDKKAAGAGKV	GLERMAAPIDRVGQTI
YSIQGQHTISPLDLAK	DDSILRLAKADGIVSK	PATGCQKLIEVDDERK
KHASPILPITEFSDIP	KTTEAKMMKAGGTEIG	STEMRRRRIEVNVELR
NQSYSQAGITETEWTS	LIKLHPESKDDKHGSY	NMCSIHLLIFYRQILG
KKRKERFGIVTSSAGT	SWGSPKVTKDGVTVAK	AFTDTERLIGDAAKNQ
GVIKAVDKKAAGAGKV	RQCFRQYAKDIGFIKL	ATMEGIGAIGGTPPAF
DDSILRLAKADGIVSK	DTSSEITTKDLKEKKE	THSKRTLLIKTVETRD
KTTEAKMMKAGGTEIG	KAFMGPLKKDRIAKEE	LATETVRSILKIDDVV
LIKLHPESKDDKHGSY	PHLTRAYAKDVKFGAD	QEPQMKETIMNQEKLA
SWGSPKVTKDGVTVAK	REDMAALEKDYEEVGA	MKHWPFQVINDGDKPK
RQCFRQYAKDIGFIKL	REDMAALEKDYEEVGV	MQVADLQSINISGNGF
DTSSEITTKDLKEKKE	FGCELKADKDYHFKVD	YTIQGQYAIPQPDLTK
PHLTRAYAKDVKFGAD	AKLLAKRMKEAKEKRQ	NDYLQIETIQALEELA
REDMAALEKDYEEVGA	RGRPKKLEKEEEEGIS	KHASPILPITEFSDIP
REDMAALEKDYEEVGV	SKLDWESFKEEEGIGE	NQSYSQAGITETEWTS
FGCELKADKDYHFKVD	AAPAKVEAKEESEESD	KLPTISQRIVSAQSLA
AKLLAKRMKEAKEKRQ	TAAGKKTEKEESTEVL	KKRKERFGIVTSSAGT
RGRPKKLEKEEEEGIS	QAVNQQLTKEKEHYQV	GVIKAVDKKAAGAGKV
SKLDWESFKEEEGIGE	YQKKKLCFKENAEQGE	DDSILRLAKADGIVSK
AAPAKVEAKEESEESD	LTHKMEANKENREAQM	KTTEAKMMKAGGTEIG
TAAGKKTEKEESTEVL	KTIIGDFQKEQKKFVE	LIKLHPESKDDKHGSY
QAVNQQLTKEKEHYQV	TRGQEPQMKETIMNQE	SWGSPKVTKDGVTVAK
YQKKKLCFKENAEQGE	FPVGSKKNKGDSHLNV	RQCFRQYAKDIGFIKL
KTIIGDFQKEQKKFVE	MFLVNSFLKGGGGGGG	DTSSEITTKDLKEKKE
TRGQEPQMKETIMNQE	SRSIIRNVKGPVREGD	KAFMGPLKKDRIAKEE
FPVGSKKNKGDSHLNV	IMSQSQVSKGVDFESS	PHLTRAYAKDVKFGAD
MFLVNSFLKGGGGGGG	ELSRYPEDKITPENLP	REDMAALEKDYEEVGV
SRSIIRNVKGPVREGD	VGVIKAVDKKAAGAGK	FGCELKADKDYHFKVD
IMSQSQVSKGVDFESS	RKTQKKKKKKASKTAE	AKLLAKRMKEAKEKRQ
ELSRYPEDKITPENLP	VEKALRDAKLDKSQIH	RGRPKKLEKEEEEGIS
VGVIKAVDKKAAGAGK	DHAEKVAEKLEALSVK	SKLDWESFKEEEGIGE
RKTQKKKKKKASKTAE	ILRIDDLIKLHPESKD	AAPAKVEAKEESEESD
VEKALRDAKLDKSQIH	FSNSHNALKLRFPAED	TAAGKKTEKEESTEVL
DHAEKVAEKLEALSVK	DKYKNIGAKLVQDVAN	QAVNQQLTKEKEHYQV
KIDRRSGKKLEDGPKF	DKHIEEVRKNKESKDP	YQKKKLCFKENAEQGE
ILRIDDLIKLHPESKD	TYVPVTTFKNLQTVNV	LTHKMEANKENREAQM
FSNSHNALKLRFPAED	ETSIDVAGKPNEVTKA	KTIIGDFQKEQKKFVE
DKYKNIGAKLVQDVAN	GRGAGRNSKQQLSAEE	TRGQEPQMKETIMNQE
DKHIEEVRKNKESKDP	RGSRRTPRKRVETSEH	FPVGSKKNKGDSHLNV
TYVPVTTFKNLQTVNV	TKDGVTVAKSIDLKDK	MFLVNSFLKGGGGGGG
ADAINTEFKNTRTNEK	KQKMSTLEKSKLDWES	IMSQSQVSKGVDFESS
ETSIDVAGKPNEVTKA	ELYAELRAKSTPSGFT	ELSRYPEDKITPENLP
GRGAGRNSKQQLSAEE	KKASSKKQKTENVFVD	VGVIKAVDKKAAGAGK
RGSRRTPRKRVETSEH	PDGQMPSDKTIGGGDD	RKTQKKKKKKASKTAE
PNSPLYSVKSFEELRL	IGKKLYEGKTKEVYEL	VEKALRDAKLDKSQIH
TKDGVTVAKSIDLKDK	IDLAVLLGKTPSTMEN	DHAEKVAEKLEALSVK
ELYAELRAKSTPSGFT	HSKRTLLIKTVETRDG	KIDRRSGKKLEDGPKF
KKASSKKQKTENVFVD	SAHNNHMAKVLTPELY	ILRIDDLIKLHPESKD
PDGQMPSDKTIGGGDD	MSRPVRNRKVVDYSQF	FSNSHNALKLRFPAED
IGKKLYEGKTKEVYEL	AVAPSAVNLADPRTPT	DKYKNIGAKLVQDVAN
IDLAVLLGKTPSTMEN	LVSVSALTLATETVRS	DKHIEEVRKNKESKDP
HSKRTLLIKTVETRDG	SFGLSARDLDELSRYP	TYVPVTTFKNLQTVNV
MSRPVRNRKVVDYSQF	LAVEALSSLDGDLAGR	ADAINTEFKNTRTNEK
AVAPSAVNLADPRTPT	QGQHTISPLDLAKLNQ	ETSIDVAGKPNEVTKA
MVRERESFLAPSSGVQ	KNQALKLQLDNQYAVL	GRGAGRNSKQQLSAEE
LVSVSALTLATETVRS	LTPQGQRDLDRIAGQV	RGSRRTPRKRVETSEH
LAVEALSSLDGDLAGR	HAEKVAEKLEALSVKE	PNSPLYSVKSFEELRL
QGQHTISPLDLAKLNQ	PANDITSQLEINFGDL	TKDGVTVAKSIDLKDK
KNQALKLQLDNQYAVL	MRKVPRVSLERLDLDL	KQKMSTLEKSKLDWES
LTPQGQRDLDRIAGQV	REGDVLTLLESEREAR	ELYAELRAKSTPSGFT
HAEKVAEKLEALSVKE	QESAEPSQLEVPATEE	PDGQMPSDKTIGGGDD
PANDITSQLEINFGDL	GSELIQKYLGDGPKLV	IGKKLYEGKTKEVYEL
MRKVPRVSLERLDLDL	PGGGSNFSLGFDEPTE	IDLAVLLGKTPSTMEN
REGDVLTLLESEREAR	SSNWEAADLGNEERKQ	HSKRTLLIKTVETRDG
QESAEPSQLEVPATEE	LRIDDLIKLHPESKDD	SAHNNHMAKVLTPELY
GSELIQKYLGDGPKLV	RRKHQITYLIHQAKER	AVAPSAVNLADPRTPT
PGGGSNFSLGFDEPTE	DTHSKRTLLIKTVETR	MVRERESFLAPSSGVQ
SSNWEAADLGNEERKQ	QNYLFGCELKADKDYH	SFGLSARDLDELSRYP
LRIDDLIKLHPESKDD	QTAHRRNMLKGQHEKE	LAVEALSSLDGDLAGR
RRKHQITYLIHQAKER	DDDAGSAPLKSSGQHQ	QGQHTISPLDLAKLNQ
DTHSKRTLLIKTVETR	GKTKEVYELLDSPGKV	KNQALKLQLDNQYAVL
QNYLFGCELKADKDYH	EALTYDGALLGDRSLR	LTPQGQRDLDRIAGQV
QTAHRRNMLKGQHEKE	VDTHSKRTLLIKTVET	HAEKVAEKLEALSVKE
RAQRPRLQLKPRTVAT	QTVTQLQQLLQAVNQQ	PANDITSQLEINFGDL
DDDAGSAPLKSSGQHQ	LDAAGVASLLTTAEVV	PMGIVLDALEQQEEGI
GKTKEVYELLDSPGKV	VIQELRPTLNELGIST	MRKVPRVSLERLDLDL
EALTYDGALLGDRSLR	LRETNLDSLPLVDTHS	REGDVLTLLESEREAR
VDTHSKRTLLIKTVET	DHIPTPQDLPQRKSSL	QESAEPSQLEVPATEE
QTVTQLQQLLQAVNQQ	TETQEKNTLPTKETIE	GSELIQKYLGDGPKLV
LDAAGVASLLTTAEVV	RLLEEHAKLQAAVDGP	PGGGSNFSLGFDEPTE
VIQELRPTLNELGIST	TADNLVLNLQDESFTR	SSNWEAADLGNEERKQ
KERAQRFGLNVSSISR	GADARALMLQGVDLLA	LRIDDLIKLHPESKDD
LRETNLDSLPLVDTHS	PHQVEQTELQQEQLQT	RRKHQITYLIHQAKER
DHIPTPQDLPQRKSSL	QMAAKLERLREKDKHI	DTHSKRTLLIKTVETR
TETQEKNTLPTKETIE	KELAEQLGLSTGEKEK	QNYLFGCELKADKDYH
RLLEEHAKLQAAVDGP	PLLVSVSALTLATETV	QTAHRRNMLKGQHEKE
TADNLVLNLQDESFTR	ETNLDSLPLVDTHSKR	DDDAGSAPLKSSGQHQ
GADARALMLQGVDLLA	RCSRYLYTLVITDKEK	GKTKEVYELLDSPGKV
PHQVEQTELQQEQLQT	GPPLRGSNMDFREPTE	EALTYDGALLGDRSLR
QMAAKLERLREKDKHI	VSSSSYRRMFGGPGTA	VDTHSKRTLLIKTVET
AGRNSKQQLSAEELDA	GNFGGSRNMGGPYGGG	QTVTQLQQLLQAVNQQ
KELAEQLGLSTGEKEK	GKNVIGLQMGTNRGAS	LDAAGVASLLTTAEVV
TRKVDIEVLSVLASLG	GTRGQEPQMKETIMNQ	VIQELRPTLNELGIST
PLLVSVSALTLATETV	EPQMKETIMNQEKLAK	KERAQRFGLNVSSISR
ETNLDSLPLVDTHSKR	MQAQMQMQMQGGDGDG	LRETNLDSLPLVDTHS
RCSRYLYTLVITDKEK	ARMQAQMQMQMQGGDG	DHIPTPQDLPQRKSSL
SNTQPIPILYEHQLGQ	PYRSQPAFMQSSLSQP	TETQEKNTLPTKETIE
GPPLRGSNMDFREPTE	PAPPDWSHMRGIISSD	RLLEEHAKLQAAVDGP
VSSSSYRRMFGGPGTA	GGYGGQSSMSGYDQVL	TADNLVLNLQDESFTR
GNFGGSRNMGGPYGGG	EKVELQELNDRFANYI	PHQVEQTELQQEQLQT
GKNVIGLQMGTNRGAS	ARIRTRMQNDSILKSE	QMAAKLERLREKDKHI
GTRGQEPQMKETIMNQ	IQELRPTLNELGISTP	AGRNSKQQLSAEELDA
EPQMKETIMNQEKLAK	KKKVWLDPNETNEIAN	KELAEQLGLSTGEKEK
MQAQMQMQMQGGDGDG	SGMNVARLNFSHGTHE	PLLVSVSALTLATETV
ARMQAQMQMQMQGGDG	AQVATISANGDKEIGN	ETNLDSLPLVDTHSKR
PYRSQPAFMQSSLSQP	KLPVDSVFNKFEDEDS	RCSRYLYTLVITDKEK
PAPPDWSHMRGIISSD	PPGPAVQLNKTPSSSK	SNTQPIPILYEHQLGQ
GGYGGQSSMSGYDQVL	PSIDKTLVNKVVHSSV	QKWWHTGALYRIGDLQ
EKVELQELNDRFANYI	DIQPGPLFNNNADGVA	GPPLRGSNMDFREPTE
ARIRTRMQNDSILKSE	SVFQTNQSNNQQSNFE	VSSSSYRRMFGGPGTA
IQELRPTLNELGISTP	GQYFAKPRNQGGYGGS	GNFGGSRNMGGPYGGG
KKKVWLDPNETNEIAN	EGFGCVVTNRFDQLFD	GKNVIGLQMGTNRGAS
SGMNVARLNFSHGTHE	EASQSHLRNSPEDKRA	GTRGQEPQMKETIMNQ
AQVATISANGDKEIGN	KPGQFIHTNWTGHGGT	EPQMKETIMNQEKLAK
KLPVDSVFNKFEDEDS	PLMSLRTAPAANLASR	MQAQMQMQMQGGDGDG
PPGPAVQLNKTPSSSK	DAGKEGNNPAENGDAK	ARMQAQMQMQMQGGDG
DYSGNYGYNNDNQEFY	DLKAARSIPAGAEPGE	PYRSQPAFMQSSLSQP
DIQPGPLFNNNADGVA	SHRNANAEPAVQRTLL	PAPPDWSHMRGIISSD
SVFQTNQSNNQQSNFE	GPPQPWGHPDVHIMQH	GGYGGQSSMSGYDQVL
GQYFAKPRNQGGYGGS	ASAPDVDDPEAFPALA	EKVELQELNDRFANYI
EGFGCVVTNRFDQLFD	SLPYYTGVPGLPSTFQ	ARIRTRMQNDSILKSE
EASQSHLRNSPEDKRA	YEKEKASLPGVKKALG	IQELRPTLNELGISTP
KPGQFIHTNWTGHGGT	EVFKDLFDPIIEDRHG	KKKVWLDPNETNEIAN
PLMSLRTAPAANLASR	QPNNVIRQPLGPDGSQ	SGMNVARLNFSHGTHE
DAGKEGNNPAENGDAK	LKPRTVATPLNQVANP	AQVATISANGDKEIGN
DLKAARSIPAGAEPGE	RIDRKIEFPLPDEKTK	KLPVDSVFNKFEDEDS
SHRNANAEPAVQRTLL	RTAGIQRIPLPPPPAP	PPGPAVQLNKTPSSSK
GPPQPWGHPDVHIMQH	SDFPSPFDPLTLPEKP	PSIDKTLVNKVVHSSV
ASAPDVDDPEAFPALA	TPLNQVANPNSAIFGG	DYSGNYGYNNDNQEFY
SLPYYTGVPGLPSTFQ	GKETKAADPPAENSSA	DIQPGPLFNNNADGVA
YEKEKASLPGVKKALG	LQLLASSDPPALASKN	SVFQTNQSNNQQSNFE
EVFKDLFDPIIEDRHG	AKMKNKQLPSAGPDKN	GQYFAKPRNQGGYGGS
QPNNVIRQPLGPDGSQ	NPFQVPSGPSGAPPMP	EGFGCVVTNRFDQLFD
LKPRTVATPLNQVANP	TPSNPFQVPSGPSGAP	EASQSHLRNSPEDKRA
RIDRKIEFPLPDEKTK	PLHGVLKTPTSSPASS	KPGQFIHTNWTGHGGT
RTAGIQRIPLPPPPAP	KYCAAPTEPVIHNGSQ	PLMSLRTAPAANLASR
SDFPSPFDPLTLPEKP	LVPVPVSEPVPEPEPE	DAGKEGNNPAENGDAK
TPLNQVANPNSAIFGG	QEPANPNMPVVLTSGT	DLKAARSIPAGAEPGE
GKETKAADPPAENSSA	MSGYDQVLQENSSDFQ	GLSMERMVPAGMGAGL
QDGGRKLTPQGQRDLD	KVVDYSQFQESDDADE	SHRNANAEPAVQRTLL
AKMKNKQLPSAGPDKN	GKQAEVANQETKEDLP	GPPQPWGHPDVHIMQH
NPFQVPSGPSGAPPMP	KVQNGSVHQKDGLNDD	ASAPDVDDPEAFPALA
TPSNPFQVPSGPSGAP	KPANDITSQLEINFGD	YEKEKASLPGVKKALG
PLHGVLKTPTSSPASS	RMQAQMQMQMQGGDGD	EVFKDLFDPIIEDRHG
KYCAAPTEPVIHNGSQ	LGMSSSLNQQGAHSAL	QPNNVIRQPLGPDGSQ
LVPVPVSEPVPEPEPE	RFAVRDMRQTVAVGVI	LKPRTVATPLNQVANP
QEPANPNMPVVLTSGT	RTVATPLNQVANPNSA	RIDRKIEFPLPDEKTK
MSGYDQVLQENSSDFQ	KTVETRDGQVINETSQ	RTAGIQRIPLPPPPAP
KVVDYSQFQESDDADE	VKAKFFSRRAEEKIKS	SDFPSPFDPLTLPEKP
GKQAEVANQETKEDLP	RAPKKPLTRAEVGEKT	TPLNQVANPNSAIFGG
KVQNGSVHQKDGLNDD	RLFGIRAKRAKEAAEQ	GKETKAADPPAENSSA
KPANDITSQLEINFGD	NNPQRTGQRAQENYEG	LQLLASSDPPALASKN
EMIARMQAQMQMQMQG	VVRHKNRGRDEVSKNQ	QDGGRKLTPQGQRDLD
RFAVRDMRQTVAVGVI	LLIKTVETRDGQVINE	AKMKNKQLPSAGPDKN
RTVATPLNQVANPNSA	SIRSVRLVRDKDTDKF	NPFQVPSGPSGAPPMP
KTVETRDGQVINETSQ	DPRAIVEYRDLDAPDD	TPSNPFQVPSGPSGAP
QSSMSGYDQVLQENSS	ATSKERTRRDLIQDQN	PLHGVLKTPTSSPASS
VKAKFFSRRAEEKIKS	VNVDKVLERDQKLSEL	KYCAAPTEPVIHNGSQ
RAPKKPLTRAEVGEKT	SFQQSSLSRDSQGHGR	LVPVPVSEPVPEPEPE
RLFGIRAKRAKEAAEQ	SPPQKRMRRDWDEHSS	SVPGVRLLQDSVDFSL
TPELYAELRAKSTPSG	TLSGGGDQREAQTLDS	KEIYPYVIQELRPTLN
NNPQRTGQRAQENYEG	PEAAQMVRREFQLDLD	MSGYDQVLQENSSDFQ
TGAGKHVPRAVFVDLE	QVRAALLSRELAGGLE	KVVDYSQFQESDDADE
VVRHKNRGRDEVSKNQ	PNFSSLNLRETNLDSL	GNLPFNTVQGDIDAIF
LLIKTVETRDGQVINE	EKLKKRKERFGIVTSS	MGGKFMKSQGLSQLYH
SIRSVRLVRDKDTDKF	AEVDKVTGRFNGQFKT	KVQNGSVHQKDGLNDD
DPRAIVEYRDLDAPDD	GSQSSKAPRGDVTAEE	KPANDITSQLEINFGD
ATSKERTRRDLIQDQN	QAILAAQRRGEDVETS	RMQAQMQMQMQGGDGD
VNVDKVLERDQKLSEL	VRLYVELHRGEELGGG	LGMSSSLNQQGAHSAL
SFQQSSLSRDSQGHGR	STARHLYLRGGAGVGS	RFAVRDMRQTVAVGVI
TLSGGGDQREAQTLDS	TKKKRGSYRGGSISVQ	RTVATPLNQVANPNSA
PEAAQMVRREFQLDLD	QPSPVMTRRGLRDSHS	KTVETRDGQVINETSQ
MAAKLERLREKDKHIE	SFKAELSYRGPVSGTE	VKAKFFSRRAEEKIKS
QVRAALLSRELAGGLE	EQMEQMKQRIAEENIM	RAPKKPLTRAEVGEKT
PNFSSLNLRETNLDSL	RVETSEHFRIDGPVIS	RLFGIRAKRAKEAAEQ
EKLKKRKERFGIVTSS	KDFLLTARRKDAKSVK	TPELYAELRAKSTPSG
AEVDKVTGRFNGQFKT	FVVPRRMARKGAGDGS	NNPQRTGQRAQENYEG
GSQSSKAPRGDVTAEE	GLNVSSISRKSEDDEK	TGAGKHVPRAVFVDLE
QAILAAQRRGEDVETS	PGARLTTTRKTPQGPP	VVRHKNRGRDEVSKNQ
VRLYVELHRGEELGGG	GESDDSILRLAKADGI	LLIKTVETRDGQVINE
STARHLYLRGGAGVGS	HRRQEELKRLEENDDD	SIRSVRLVRDKDTDKF
TKKKRGSYRGGSISVQ	RLGRSKRKRLEVEEPL	DPRAIVEYRDLDAPDD
QPSPVMTRRGLRDSHS	FSVNASSERLNMGEIE	ATSKERTRRDLIQDQN
EQMEQMKQRIAEENIM	GRFAVRDMRQTVAVGV	VNVDKVLERDQKLSEL
RVETSEHFRIDGPVIS	LQPSPVMTRRGLRDSH	SFQQSSLSRDSQGHGR
FVVPRRMARKGAGDGS	EKRASSPFRRVREEEI	SPPQKRMRRDWDEHSS
SEVDKKLKRKKQVAPE	ESHPHGVKRSASPDDD	TLSGGGDQREAQTLDS
GLNVSSISRKSEDDEK	DSSGPALKRSFEVEEV	GGLSRSLGREEEEDEE
PGARLTTTRKTPQGPP	GQIPGRERRSGPTDDG	PEAAQMVRREFQLDLD
TTTVKFNRRKVMDSDE	KELVLDNSRSNEGKLE	MAAKLERLREKDKHIE
GESDDSILRLAKADGI	GGRPNRGSRTDKSSAS	QVRAALLSRELAGGLE
HRRQEELKRLEENDDD	DHKSTSHFRTGEEDKK	PNFSSLNLRETNLDSL
RLGRSKRKRLEVEEPL	PLVDTHSKRTLLIKTV	SDNGVRVQRFFVADTA
FSVNASSERLNMGEIE	PPREAHFVRTNGKEPE	EKLKKRKERFGIVTSS
KDLSIRSVRLVRDKDT	AVTMGPKGRTVIIEQS	GSQSSKAPRGDVTAEE
GRFAVRDMRQTVAVGV	TPVTLKQRRVEHNQSY	QAILAAQRRGEDVETS
LQPSPVMTRRGLRDSH	NVYKKEKARVITEEEK	STARHLYLRGGAGVGS
EKRASSPFRRVREEEI	PEPPPRSRRVPRPPER	TKKKRGSYRGGSISVQ
ESHPHGVKRSASPDDD	MGGTTSTRRVTFEADE	QPSPVMTRRGLRDSHS
DSSGPALKRSFEVEEV	SSAASRVQSAAPARPG	SFKAELSYRGPVSGTE
GQIPGRERRSGPTDDG	LNQVANPNSAIFGGAR	EQMEQMKQRIAEENIM
KELVLDNSRSNEGKLE	KQKADVTLSALNDSDA	RVETSEHFRIDGPVIS
GGRPNRGSRTDKSSAS	STRTYSLGSALRPSTS	KDFLLTARRKDAKSVK
EVEGKMVSRTEGNIDD	EEILITVLSAMTEEAA	FVVPRRMARKGAGDGS
DHKSTSHFRTGEEDKK	SAAAMNLASARTPAIP	SEVDKKLKRKKQVAPE
PLVDTHSKRTLLIKTV	GQYIENLMSASSVFQT	GLNVSSISRKSEDDEK
PPREAHFVRTNGKEPE	GAIRRMGESDDSILRL	PGARLTTTRKTPQGPP
AVTMGPKGRTVIIEQS	RQRTAEAFSDEKTQIV	TTTVKFNRRKVMDSDE
TPVTLKQRRVEHNQSY	TMQARGFGSDQSENVD	GESDDSILRLAKADGI
NVYKKEKARVITEEEK	RSIQEAPVSEDLVIRL	HRRQEELKRLEENDDD
PEPPPRSRRVPRPPER	FQDAYVLLSEKKISSI	KDLSIRSVRLVRDKDT
MGGTTSTRRVTFEADE	EVEKNSTPSEPGSGRG	MSAAGLAARMSQVPAP
SSAASRVQSAAPARPG	SGQAGAAASESLFVSN	GRFAVRDMRQTVAVGV
LNQVANPNSAIFGGAR	EMPDTVLQSETLKDTA	LQPSPVMTRRGLRDSH
KQKADVTLSALNDSDA	ESNMNDLVSEYQQYQD	EKRASSPFRRVREEEI
STRTYSLGSALRPSTS	YYSQSQGDSEYYDYGH	ESHPHGVKRSASPDDD
EEILITVLSAMTEEAA	LKEKIDRRSGKKLEDG	DSSGPALKRSFEVEEV
SAAAMNLASARTPAIP	PFLSRESLSGQAVRRP	GQIPGRERRSGPTDDG
GQYIENLMSASSVFQT	ERLKGLLQSGQIPGRE	KELVLDNSRSNEGKLE
TLAEKLGGSAVISLEG	KYQYGGLNSGRPVTPP	GGRPNRGSRTDKSSAS
GAIRRMGESDDSILRL	RDEVSHLQSGSHLANN	EVEGKMVSRTEGNIDD
RQRTAEAFSDEKTQIV	GMPNIAMTSGTVQPKQ	DHKSTSHFRTGEEDKK
IQPDGQMPSDKTIGGG	GYGGQSSMSGYDQVLQ	PLVDTHSKRTLLIKTV
TMQARGFGSDQSENVD	NVPASVCYSHTDIKVP	PPREAHFVRTNGKEPE
RSIQEAPVSEDLVIRL	TTATVLARSIAKEGFE	AVTMGPKGRTVIIEQS
FQDAYVLLSEKKISSI	KDGVTVAKSIDLKDKY	TPVTLKQRRVEHNQSY
EVEKNSTPSEPGSGRG	VANKRDTRSIEEAMNE	NVYKKEKARVITEEEK
SGQAGAAASESLFVSN	PYTLAPATSILEYPIE	PEPPPRSRRVPRPPER
EMPDTVLQSETLKDTA	TLATETVRSILKIDDV	MGGTTSTRRVTFEADE
ESNMNDLVSEYQQYQD	RRMGESDDSILRLAKA	DRRGRPGDRYDGMVGF
YYSQSQGDSEYYDYGH	QRFGLNVSSISRKSED	SSAASRVQSAAPARPG
LKEKIDRRSGKKLEDG	AGLKQSHLSKAIGSSP	LNQVANPNSAIFGGAR
PFLSRESLSGQAVRRP	DLIKLHPESKDDKHGS	KQKADVTLSALNDSDA
ERLKGLLQSGQIPGRE	RGRGAGRNSKQQLSAE	STRTYSLGSALRPSTS
KYQYGGLNSGRPVTPP	RPRSPGSNSKVPEIEV	EEILITVLSAMTEEAA
RDEVSHLQSGSHLANN	EDRVGTIKSKVVGDRE	SAAAMNLASARTPAIP
GMPNIAMTSGTVQPKQ	WVFKVSHFSKYGLQDS	GQYIENLMSASSVFQT
GYGGQSSMSGYDQVLQ	KLAVEALSSLDGDLAG	TLAEKLGGSAVISLEG
NVPASVCYSHTDIKVP	PPGGGSNFSLGFDEPT	GAIRRMGESDDSILRL
FTTSVVRRSHYEEGPG	PVYRQPPESLKLEAGD	RQRTAEAFSDEKTQIV
TTATVLARSIAKEGFE	SLPLPNFSSLNLRETN	IQPDGQMPSDKTIGGG
KDGVTVAKSIDLKDKY	LMNLGMSSSLNQQGAH	TMQARGFGSDQSENVD
PYTLAPATSILEYPIE	NLRETNLDSLPLVDTH	RSIQEAPVSEDLVIRL
TLATETVRSILKIDDV	QDLPQRKSSLVTSKLA	FQDAYVLLSEKKISSI
RRMGESDDSILRLAKA	AQAAAQTNSNAAGKQL	EVEKNSTPSEPGSGRG
QRFGLNVSSISRKSED	ASTASQLHSNVVNYVQ	SGQAGAAASESLFVSN
AGLKQSHLSKAIGSSP	ASQSHLRNSPEDKRAG	EMPDTVLQSETLKDTA
DLIKLHPESKDDKHGS	PKLKAFLASPEYVNLP	ESNMNDLVSEYQQYQD
RGRGAGRNSKQQLSAE	LKTSQLGDSPFYPGKT	YYSQSQGDSEYYDYGH
RPRSPGSNSKVPEIEV	TSRSLYASSPGGVYAT	LKEKIDRRSGKKLEDG
EDRVGTIKSKVVGDRE	KEVYELLDSPGKVLLQ	LEVEEPLGSGPSVLGT
PASKFSSASKYAALSV	VIIEQSWGSPKVTKDG	PFLSRESLSGQAVRRP
WVFKVSHFSKYGLQDS	SIVSSPLNSPLDRSGI	ERLKGLLQSGQIPGRE
KLAVEALSSLDGDLAG	AAAAMNLASPRTAVAP	RDEVSHLQSGSHLANN
PPGGGSNFSLGFDEPT	LSSDFTCGSPTAAGKK	GMPNIAMTSGTVQPKQ
PVYRQPPESLKLEAGD	RNRKVVDYSQFQESDD	VEHKVETFSGVYKKLT
SLPLPNFSSLNLRETN	TKQNSVPPSQTKSETS	GYGGQSSMSGYDQVLQ
LMNLGMSSSLNQQGAH	RVEFMDDTSRSIIRNV	AFVQPTQQSHPQIEPA
NLRETNLDSLPLVDTH	NNEQPTLQSSAQLLLQ	NVPASVCYSHTDIKVP
QDLPQRKSSLVTSKLA	MSDAAVDTSSEITTKD	FTTSVVRRSHYEEGPG
AQAAAQTNSNAAGKQL	LLGFSVNASSERLNMG	TTATVLARSIAKEGFE
SNAIAYYVSNEELRGS	AQRFGLNVSSISRKSE	LSCNSNFHSIASVLLQ
ASTASQLHSNVVNYVQ	APSDFINFSSLDDEGD	VANKRDTRSIEEAMNE
ASQSHLRNSPEDKRAG	ARSQAPLESSLDSLGD	PYTLAPATSILEYPIE
PKLKAFLASPEYVNLP	ISLPLPNFSSLNLRET	TLATETVRSILKIDDV
LKTSQLGDSPFYPGKT	RSQPAFMQSSLSQPSV	RRMGESDDSILRLAKA
TSRSLYASSPGGVYAT	TPKTPKGPSSVEDIKA	QRFGLNVSSISRKSED
KEVYELLDSPGKVLLQ	RSSAVRLRSSVPGVRL	AGLKQSHLSKAIGSSP
VIIEQSWGSPKVTKDG	ATQLQTTQSVEGATGS	DLIKLHPESKDDKHGS
SIVSSPLNSPLDRSGI	GMNHSTLHSVFQTNQS	RGRGAGRNSKQQLSAE
AAAAMNLASPRTAVAP	SAAFSSVGSVITKKLE	RPRSPGSNSKVPEIEV
LSSDFTCGSPTAAGKK	VAEKLEALSVKEETKE	EDRVGTIKSKVVGDRE
RNRKVVDYSQFQESDD	KAQAAAPASVPAQAPK	PASKFSSASKYAALSV
TKQNSVPPSQTKSETS	SSAVRLRSSVPGVRLL	WVFKVSHFSKYGLQDS
RVEFMDDTSRSIIRNV	EVVYSKAASVPKVETV	KLAVEALSSLDGDLAG
MSDAAVDTSSEITTKD	SDLQLDRISVYYNEAT	PPGGGSNFSLGFDEPT
LLGFSVNASSERLNMG	YGHGEVQDSYEAYGQD	PVYRQPPESLKLEAGD
AQRFGLNVSSISRKSE	KQQNQYQASYNQSFSS	SLPLPNFSSLNLRETN
APSDFINFSSLDDEGD	QRRVEHNQSYSQAGIT	LMNLGMSSSLNQQGAH
ARSQAPLESSLDSLGD	AAPVAADTTAAPAAAA	NLRETNLDSLPLVDTH
ISLPLPNFSSLNLRET	SARTPAIPTAVNLADS	QDLPQRKSSLVTSKLA
RSQPAFMQSSLSQPSV	PASVCYSHTDIKVPDF	AQAAAQTNSNAAGKQL
TPKTPKGPSSVEDIKA	KDVRWPTETDVSSAKN	ASTASQLHSNVVNYVQ
RSSAVRLRSSVPGVRL	KVKSLKFATEAAITIL	ASQSHLRNSPEDKRAG
SYSFSDLNSTRGDADM	FSLADAINTEFKNTRT	PKLKAFLASPEYVNLP
PKTPKGPSSVEDIKAK	HASPILPITEFSDIPR	LKTSQLGDSPFYPGKT
ATQLQTTQSVEGATGS	ETVISTKKTEKSNIEE	TSRSLYASSPGGVYAT
GMNHSTLHSVFQTNQS	AANASATTTEPLPEKT	KEVYELLDSPGKVLLQ
SAAFSSVGSVITKKLE	SVSALTLATETVRSIL	VIIEQSWGSPKVTKDG
VAEKLEALSVKEETKE	YSQAGITETEWTSGSS	AAAAMNLASPRTAVAP
KAQAAAPASVPAQAPK	PKRCPHPLTFDVNNPL	LSSDFTCGSPTAAGKK
SSAVRLRSSVPGVRLL	VCSNPPCETHETGTTH	RNRKVVDYSQFQESDD
EVVYSKAASVPKVETV	MQQSHFPMTHGNTGFS	TKQNSVPPSQTKSETS
LVVQPLLVSVSALTLA	TVSVTELQTHPELDTD	RVEFMDDTSRSIIRNV
SDLQLDRISVYYNEAT	RTLKIPAMTIAKNAGV	NNEQPTLQSSAQLLLQ
YGHGEVQDSYEAYGQD	GQEPQMKETIMNQEKL	GYTEHQVVSSDFNSDT
KQQNQYQASYNQSFSS	AYSIQGQHTISPLDLA	MSDAAVDTSSEITTKD
QRRVEHNQSYSQAGIT	TQEKNTLPTKETIEQE	LLGFSVNASSERLNMG
AAPVAADTTAAPAAAA	KHLTHAQSTLDAKATK	AQRFGLNVSSISRKSE
SKPGLRPRTALGDIGN	ERSYVSKPTLKEVVIV	ARSQAPLESSLDSLGD
SARTPAIPTAVNLADS	LVDTHSKRTLLIKTVE	ISLPLPNFSSLNLRET
PASVCYSHTDIKVPDF	KTETQEKNTLPTKETI	RSQPAFMQSSLSQPSV
KDVRWPTETDVSSAKN	GTENGVNGTLTSNVAD	QGLRPRTVSSPIPYTP
KVKSLKFATEAAITIL	VRCSRYLYTLVITDKE	TPKTPKGPSSVEDIKA
FSLADAINTEFKNTRT	TERFGQAATMEGIGAI	RSSAVRLRSSVPGVRL
AANASATTTEPLPEKT	RTIGTGLVTNTLAMTE	ALQNIIPASTGAAKAV
SVSALTLATETVRSIL	NNHMAKVLTPELYAEL	SYSFSDLNSTRGDADM
YSQAGITETEWTSGSS	NVSVNASATPFQQPSG	PKTPKGPSSVEDIKAK
PKRCPHPLTFDVNNPL	QLKPRTVATPLNQVAN	ATQLQTTQSVEGATGS
VCSNPPCETHETGTTH	SRQAQKVATPLPDPMA	GMNHSTLHSVFQTNQS
MQQSHFPMTHGNTGFS	ANYPSSSRTPQAPASA	SAAFSSVGSVITKKLE
TVSVTELQTHPELDTD	DQDGGRKLTPQGQRDL	VAEKLEALSVKEETKE
RTLKIPAMTIAKNAGV	TLLIKTVETRDGQVIN	KAQAAAPASVPAQAPK
GQEPQMKETIMNQEKL	GETLQMLTTSTTLEKL	EVVYSKAASVPKVETV
AYSIQGQHTISPLDLA	AAAPVAADTTAAPAAA	SDLQLDRISVYYNEAT
TQEKNTLPTKETIEQE	AAGVASLLTTAEVVVT	YGHGEVQDSYEAYGQD
KHLTHAQSTLDAKATK	SESVSTTTTTHITKTV	KQQNQYQASYNQSFSS
ERSYVSKPTLKEVVIV	SVQATQLQTTQSVEGA	QRRVEHNQSYSQAGIT
LVDTHSKRTLLIKTVE	RPPGARLTTTRKTPQG	AAPVAADTTAAPAAAA
KTETQEKNTLPTKETI	YRPPGARLTTTRKTPQ	AGVASLLTTAEVVVTE
GTENGVNGTLTSNVAD	PAGIYHRFTVDEKNYT	SARTPAIPTAVNLADS
VRCSRYLYTLVITDKE	SKRTLLIKTVETRDGQ	PASVCYSHTDIKVPDF
TERFGQAATMEGIGAI	TTTTHITKTVKGGISE	KDVRWPTETDVSSAKN
RTIGTGLVTNTLAMTE	AASVPKVETVKSDNKD	KVKSLKFATEAAITIL
NNHMAKVLTPELYAEL	TLKMSVQPTVSLGGFE	FSLADAINTEFKNTRT
NVSVNASATPFQQPSG	SQGKVLQATVVAVGSG	HASPILPITEFSDIPR
QLKPRTVATPLNQVAN	PSPSLNKLVAENKFGK	ETVISTKKTEKSNIEE
SRQAQKVATPLPDPMA	TVATPLNQVANPNSAI	AANASATTTEPLPEKT
ANYPSSSRTPQAPASA	NLASPRTAVAPSAVNL	SVSALTLATETVRSIL
DQDGGRKLTPQGQRDL	AVRDMRQTVAVGVIKA	YSQAGITETEWTSGSS
TLLIKTVETRDGQVIN	GSDTIKPNVDDSKEYF	PKRCPHPLTFDVNNPL
GETLQMLTTSTTLEKL	VAVGVIKAVDKKAAGA	VCSNPPCETHETGTTH
AAAPVAADTTAAPAAA	ARALMLQGVDLLADAV	MQQSHFPMTHGNTGFS
AAGVASLLTTAEVVVT	AEDDEDDDVDTKKQKT	TVSVTELQTHPELDTD
SESVSTTTTTHITKTV	KRTLLIKTVETRDGQV	RTLKIPAMTIAKNAGV
SVQATQLQTTQSVEGA	LLLPMCWAVEVKRPRG	GQEPQMKETIMNQEKL
RPPGARLTTTRKTPQG	AGKHVPRAVFVDLEPT	AYSIQGQHTISPLDLA
YRPPGARLTTTRKTPQ	TEPPYTAYVGNLPFNT	TQEKNTLPTKETIEQE
PAGIYHRFTVDEKNYT	RDMRQTVAVGVIKAVD	LLVSVSALTLATETVR
SKRTLLIKTVETRDGQ	LAFIKRTPVIDADKPV	KHLTHAQSTLDAKATK
TTTTHITKTVKGGISE	VFVDLEPTVIDEVRTG	ERSYVSKPTLKEVVIV
AASVPKVETVKSDNKD	MRQTVAVGVIKAVDKK	GNRKSLRRTLKSGLGD
TLKMSVQPTVSLGGFE	TVETRDGQVINETSQH	LVDTHSKRTLLIKTVE
SQGKVLQATVVAVGSG	GFGEISSPVIREAEVT	KTETQEKNTLPTKETI
PNKLYTLVTYVPVTTF	CSRYLYTLVITDKEKA	VRCSRYLYTLVITDKE
PSPSLNKLVAENKFGK	VYKKEKARVITEEEKN	TERFGQAATMEGIGAI
TVATPLNQVANPNSAI	MKKVGRKGVITVKDGK	RTIGTGLVTNTLAMTE
AVRDMRQTVAVGVIKA	ASVPKVETVKSDNKDD	NVSVNASATPFQQPSG
GSDTIKPNVDDSKEYF	SSMSGYDQVLQENSSD	QLKPRTVATPLNQVAN
VAVGVIKAVDKKAAGA	NMNAPVPPVNEPETLK	SRQAQKVATPLPDPMA
AEDDEDDDVDTKKQKT	MASLSLAPVNIFKAGA	ANYPSSSRTPQAPASA
KRTLLIKTVETRDGQV	RGGSISVQVNSIKFDS	DQDGGRKLTPQGQRDL
LLLPMCWAVEVKRPRG	VVYSKAASVPKVETVK	TLLIKTVETRDGQVIN
AGKHVPRAVFVDLEPT	YPPLGRFAVRDMRQTV	QTLPVAPRTRTSQEEL
TEPPYTAYVGNLPFNT	RLRSSVPGVRLLQDSV	GETLQMLTTSTTLEKL
RDMRQTVAVGVIKAVD	SSQYNMAGVRTEDSIR	AAAPVAADTTAAPAAA
LAFIKRTPVIDADKPV	LGGQDQLRVRVTELED	AAGVASLLTTAEVVVT
VFVDLEPTVIDEVRTG	VRSIQEAPVSEDLVIR	SESVSTTTTTHITKTV
TMGPKGRTVIIEQSWG	IRYVERSYVSKPTLKE	SVQATQLQTTQSVEGA
MRQTVAVGVIKAVDKK	ELVVQPLLVSVSALTL	YRPPGARLTTTRKTPQ
TVETRDGQVINETSQH	DVAGKPNEVTKAAESP	PAGIYHRFTVDEKNYT
GFGEISSPVIREAEVT	RDLPTIPGVTSPSSDE	SKRTLLIKTVETRDGQ
CSRYLYTLVITDKEKA	KGIIDPTKVVRTALLD	TTTTHITKTVKGGISE
VYKKEKARVITEEEKN	DDDLGSSNWEAADLGN	AASVPKVETVKSDNKD
MKKVGRKGVITVKDGK	AYGTRRHLYDPKMQTD	TLKMSVQPTVSLGGFE
ASVPKVETVKSDNKDD	GGQSSMSGYDQVLQEN	SQGKVLQATVVAVGSG
KCEFQDAYVLLSEKKI	QSQGDSEYYDYGHGEV	PNKLYTLVTYVPVTTF
SSMSGYDQVLQENSSD	GHGEVQDSYEAYGQDD	PSPSLNKLVAENKFGK
NMNAPVPPVNEPETLK	SKDDKHGSYEDAVHSG	TVATPLNQVANPNSAI
MASLSLAPVNIFKAGA	VLNIGKKLYEGKTKEV	AVRDMRQTVAVGVIKA
RGGSISVQVNSIKFDS	NTQPIPILYEHQLGQA	GSDTIKPNVDDSKEYF
VVYSKAASVPKVETVK	TSRSLALMYESEKVGV	VAVGVIKAVDKKAAGA
YPPLGRFAVRDMRQTV	ELQQELQEYEVVTESE	ARALMLQGVDLLADAV
RLRSSVPGVRLLQDSV	AKPRNQGGYGGSSSSS	AEDDEDDDVDTKKQKT
LGGQDQLRVRVTELED	YYRQQVAFYGQTLGQA	KRTLLIKTVETRDGQV
VRSIQEAPVSEDLVIR	IGYMGQTAYQYPPPPP	LLLPMCWAVEVKRPRG
IRYVERSYVSKPTLKE	VRNRKVVDYSQFQESD	TEPPYTAYVGNLPFNT
VLNAERLEVSVDGLTL	SQSQGDSEYYDYGHGE	RDMRQTVAVGVIKAVD
RDLPTIPGVTSPSSDE	AGSGTPREEEGPAGEA	LAFIKRTPVIDADKPV
SAFATPFLVVRHQLLK	ENLKKTPKKKMKMVTG	VFVDLEPTVIDEVRTG
KGIIDPTKVVRTALLD	NTDESNHDPQFEPIVS	MRQTVAVGVIKAVDKK
DDDLGSSNWEAADLGN	NHDPQFEPIVSLPEQE	TVETRDGQVINETSQH
LAPHLTRAYAKDVKFG	VDTPSGTNSGAGKKRF	GFGEISSPVIREAEVT
AYGTRRHLYDPKMQTD	DMGFGLFD________	CSRYLYTLVITDKEKA
GGQSSMSGYDQVLQEN	EADGARSAVVAAGGGS	VYKKEKARVITEEEKN
QSQGDSEYYDYGHGEV	RFAGKVTTASVKERRE	MKKVGRKGVITVKDGK
GHGEVQDSYEAYGQDD	EEAREKMLAAKSADGS	ASVPKVETVKSDNKDD
SKDDKHGSYEDAVHSG	EAREKMLAAKSADGSA	SSMSGYDQVLQENSSD
VLNIGKKLYEGKTKEV	FLKKSGKLKVPEWVDT	NMNAPVPPVNEPETLK
NTQPIPILYEHQLGQA	KKSGKLKVPEWVDTVK	MASLSLAPVNIFKAGA
TSRSLALMYESEKVGV	GPSLRPQNSTTWRDGG	RGGSISVQVNSIKFDS
ELQQELQEYEVVTESE	EIKMEEESGAPGVPSG	VVYSKAASVPKVETVK
PFYPGKTTYGGAAAAV	HHEEEIVHHKKEIERL	YPPLGRFAVRDMRQTV
AKPRNQGGYGGSSSSS	EIQKDVQTYYGQVLKR	RLRSSVPGVRLLQDSV
YYRQQVAFYGQTLGQA	QKDVQTYYGQVLKRSA	SSQYNMAGVRTEDSIR
HGIDPTGTYHGDSDLQ	KDVQTYYGQVLKRSAD	LGGQDQLRVRVTELED
IGYMGQTAYQYPPPPP	TYYGQVLKRSADLQTN	VRSIQEAPVSEDLVIR
VRNRKVVDYSQFQESD	AEKAPVKKKAAKKAGG	IRYVERSYVSKPTLKE
SQSQGDSEYYDYGHGE	VYPAGSQVMMIPSQIS	ELVVQPLLVSVSALTL
AGSGTPREEEGPAGEA	KKAFTELQAKVIDTQQ	DVAGKPNEVTKAAESP
ENLKKTPKKKMKMVTG	VQHVQAAQQIQAAEIP	RDLPTIPGVTSPSSDE
NTDESNHDPQFEPIVS	QAAQQIQAAEIPEEHI	KGIIDPTKVVRTALLD
NHDPQFEPIVSLPEQE	PEEHIPHQQIQAQLVA	DDDLGSSNWEAADLGN
VDTPSGTNSGAGKKRF	HQQIQAQLVAGQSLAG	LAPHLTRAYAKDVKFG
DMGFGLFD________	QIQAQLVAGQSLAGGQ	AYGTRRHLYDPKMQTD
EADGARSAVVAAGGGS	AQLVAGQSLAGGQQIQ	GGQSSMSGYDQVLQEN
TQVSETLKRFAGKVTT	AATGRIVAVIGAVVDV	QSQGDSEYYDYGHGEV
ETLKRFAGKVTTASVK	RSTAPSAAASASASAA	GHGEVQDSYEAYGQDD
RFAGKVTTASVKERRE	AARGAAALRRSINQPV	SKDDKHGSYEDAVHSG
FAGKVTTASVKERREI	KNKKGKTISLTDFLAE	MDPALAAQYEHDLEVA
EEAREKMLAAKSADGS	ARPATSTLNRFSALQQ	NTQPIPILYEHQLGQA
EAREKMLAAKSADGSA	AAAVPSSGSGVGGGGT	TSRSLALMYESEKVGV
FLKKSGKLKVPEWVDT	SQAVEEMRSRVVLGEF	ELQQELQEYEVVTESE
KKSGKLKVPEWVDTVK	QAVEEMRSRVVLGEFG	AKPRNQGGYGGSSSSS
GPSLRPQNSTTWRDGG	SRVVLGEFGVRNVHTT	YYRQQVAFYGQTLGQA
ENWRAFKALIAAQYSG	GPMDKKEE________	HGIDPTGTYHGDSDLQ
EIKMEEESGAPGVPSG	KENVQPLRQGRIMSTL	AGLQVLNDYLADKSYI
HHEEEIVHHKKEIERL	AVKTLNPKAEVARAQA	PKKEDALLYQSKGYND
EIQKDVQTYYGQVLKR	VKTLNPKAEVARAQAA	IGYMGQTAYQYPPPPP
QKDVQTYYGQVLKRSA	KTLNPKAEVARAQAAL	VRNRKVVDYSQFQESD
KDVQTYYGQVLKRSAD	TLNPKAEVARAQAALA	SQSQGDSEYYDYGHGE
TYYGQVLKRSADLQTN	PKAEVARAQAALAVNI	AGSGTPREEEGPAGEA
AEKAPVKKKAAKKAGG	KAEVARAQAALAVNIS	ENLKKTPKKKMKMVTG
VYPAGSQVMMIPSQIS	EEDRSKLRSVSVDLNV	NTDESNHDPQFEPIVS
KKAFTELQAKVIDTQQ	AAEVKVDGSEPKLSKN	NHDPQFEPIVSLPEQE
VQHVQAAQQIQAAEIP	SEPKLSKNELKRRLKA	VDTPSGTNSGAGKKRF
QAAQQIQAAEIPEEHI	GRTVIIEQSWGSPKVT	DMGFGLFD________
PEEHIPHQQIQAQLVA	APYKKDENKLSSANGH	EADGARSAVVAAGGGS
HQQIQAQLVAGQSLAG	KKDENKLSSANGHEER	ANGIESLGVKPDLPPP
QIQAQLVAGQSLAGGQ	KDENKLSSANGHEERS	ETLKRFAGKVTTASVK
AQLVAGQSLAGGQQIQ	ENKLSSANGHEERSKK	KRFAGKVTTASVKERR
AATGRIVAVIGAVVDV	EALRRQRLAELQAKHG	RFAGKVTTASVKERRE
ASAAAASAAAASAASG	ALRRQRLAELQAKHGD	FAGKVTTASVKERREI
RSTAPSAAASASASAA	LRRQRLAELQAKHGDP	EEAREKMLAAKSADGS
AARGAAALRRSINQPV	RQRLAELQAKHGDPGD	EAREKMLAAKSADGSA
KNKKGKTISLTDFLAE	DGIVSKNF________	QQKQEPLGSDSEGVNC
ARPATSTLNRFSALQQ	PVKTKTVSSSNGGESS	FLKKSGKLKVPEWVDT
AAAVPSSGSGVGGGGT	DSVEAAKNASNTEKLT	KKSGKLKVPEWVDTVK
SQAVEEMRSRVVLGEF	EAAKNASNTEKLTDQV	GPSLRPQNSTTWRDGG
QAVEEMRSRVVLGEFG	KLKARQLTVQMMQNPQ	ENWRAFKALIAAQYSG
SRVVLGEFGVRNVHTT	ERAYQKQPTIFQNKKR	DDLIKLHPESKDDKHG
GPMDKKEE________	QKQPTIFQNKKRVLLG	HHEEEIVHHKKEIERL
GKAIGVLTSGGDAQGM	QPTIFQNKKRVLLGET	QKDVQTYYGQVLKRSA
KENVQPLRQGRIMSTL	SLDELIRKRGAAAKGR	KDVQTYYGQVLKRSAD
NVQPLRQGRIMSTLQG	ELIRKRGAAAKGRLNA	TYYGQVLKRSADLQTN
AVKTLNPKAEVARAQA	LIRKRGAAAKGRLNAR	PMPSELKL________
VKTLNPKAEVARAQAA	IRKRGAAAKGRLNARP	AEKAPVKKKAAKKAGG
KTLNPKAEVARAQAAL	KRGAAAKGRLNARPGV	VYPAGSQVMMIPSQIS
TLNPKAEVARAQAALA	LDDIIKLNRSQRGGRG	KKAFTELQAKVIDTQQ
LNPKAEVARAQAALAV	AKLKKTETQEKNTLPT	VQHVQAAQQIQAAEIP
PKAEVARAQAALAVNI	KETIEQEKRSEIS___	QAAQQIQAAEIPEEHI
KAEVARAQAALAVNIS	EERKQKFLRLMGAGKK	PEEHIPHQQIQAQLVA
EVARAQAALAVNISAA	ERKQKFLRLMGAGKKE	HQQIQAQLVAGQSLAG
QAALAVNISAARGLQD	QKFLRLMGAGKKEHTG	QIQAQLVAGQSLAGGQ
AAEVKVDGSEPKLSKN	EKLDNQRLKNFKNKGR	AQLVAGQSLAGGQQIQ
SEPKLSKNELKRRLKA	QRLKNFKNKGRDLETM	AATGRIVAVIGAVVDV
APYKKDENKLSSANGH	PTAPAVNLAGARTPAA	ASAAAASAAAASAASG
KKDENKLSSANGHEER	TPAALAALSLTGSGTP	RSTAPSAAASASASAA
KDENKLSSANGHEERS	LTAASTAPISFGFTRT	STAPSAAASASASAAA
ENKLSSANGHEERSKK	AASTAPISFGFTRTSA	AARGAAALRRSINQPV
EALRRQRLAELQAKHG	SKLDYKPV________	ARPATSTLNRFSALQQ
ALRRQRLAELQAKHGD	DVTARSLQYEYKANSN	AAAVPSSGSGVGGGGT
LRRQRLAELQAKHGDP	SLQYEYKANSNLVLQA	VGKKIVFVTGNAKKLE
RQRLAELQAKHGDPGD	ANSNLVLQADRSLIDR	SQAVEEMRSRVVLGEF
DDRAYSSFGGGRGSRG	GETVGKTDYIPLLDVD	QAVEEMRSRVVLGEFG
DGIVSKNF________	VGKTDYIPLLDVDEKT	EMRSRVVLGEFGVRNV
PVKTKTVSSSNGGESS	KTDYIPLLDVDEKTGN	SRVVLGEFGVRNVHTT
EAAKNASNTEKLTDQV	METKIKNYKTAPFDSR	GPMDKKEE________
EKLTDQVMQNPRVLAA	ETKIKNYKTAPFDSRF	KENVQPLRQGRIMSTL
MQNPRVLAALQERLDN	KIKSVGGACVLVA___	NVQPLRQGRIMSTLQG
KLKARQLTVQMMQNPQ	FRKGGPDDRGMGSSRE	PLRQGRIMSTLQGALA
ERAYQKQPTIFQNKKR	GQLVGVDLNTGEPMVA	AVKTLNPKAEVARAQA
RAYQKQPTIFQNKKRV	VQRTLLEK________	VKTLNPKAEVARAQAA
QNKKRVLLGETGKEKL	QKLINPVKTSRNHQDL	KTLNPKAEVARAQAAL
SLDELIRKRGAAAKGR	SKHKSSLNSSPWSGLM	TLNPKAEVARAQAALA
ELIRKRGAAAKGRLNA	KSSLNSSPWSGLMALG	LNPKAEVARAQAALAV
LIRKRGAAAKGRLNAR	AEQVALSRTQVCGILR	PKAEVARAQAALAVNI
IRKRGAAAKGRLNARP	QVALSRTQVCGILREE	KAEVARAQAALAVNIS
KRGAAAKGRLNARPGV	WDTVTVLRKKGPTAAQ	AALAVNISAARGLQDV
LDDIIKLNRSQRGGRG	TVLRKKGPTAAQAKSK	EEDRSKLRSVSVDLNV
AKLKKTETQEKNTLPT	DKLYRVEYAKSGRASC	AAEVKVDGSEPKLSKN
EERKQKFLRLMGAGKK	EERSLDNFFAKRDKKK	SEPKLSKNELKRRLKA
ERKQKFLRLMGAGKKE	SLDNFFAKRDKKKKKE	MGPKGRTVIIEQSWGS
QKFLRLMGAGKKEHTG	DNFFAKRDKKKKKERS	APYKKDENKLSSANGH
EKLDNQRLKNFKNKGR	NFFAKRDKKKKKERSN	KKDENKLSSANGHEER
QRLKNFKNKGRDLETM	VDKVTGRFNGQFKTYA	KDENKLSSANGHEERS
TPAALAALSLTGSGTP	FNGQFKTYAICGAIRR	ENKLSSANGHEERSKK
LTAASTAPISFGFTRT	EQKKKRTFRKFTYRGV	ALRRQRLAELQAKHGD
SKLDYKPV________	VALNPQNTVFDAKRLI	LRRQRLAELQAKHGDP
DVTARSLQYEYKANSN	VAMNPTNTVFDAKRLI	RQRLAELQAKHGDPGD
SLQYEYKANSNLVLQA	KLDPELDS________	DDRAYSSFGGGRGSRG
ANSNLVLQADRSLIDR	AQKAQKAK________	DGIVSKNF________
GETVGKTDYIPLLDVD	SKAIGSSPLGSGEGLL	PVKTKTVSSSNGGESS
VGKTDYIPLLDVDEKT	RKFLPLFDRVLVERSA	DSVEAAKNASNTEKLT
KTDYIPLLDVDEKTGN	GLYSPQYISYIPQIHM	EAAKNASNTEKLTDQV
METKIKNYKTAPFDSR	FEDADVDH________	EKLTDQVMQNPRVLAA
KIKSVGGACVLVA___	SGHRLELLAAYEEVIR	MQNPRVLAALQERLDN
FRKGGPDDRGMGSSRE	APAIESVD________	NPRVLAALQERLDNVP
GQLVGVDLNTGEPMVA	SATGVPTV________	KLKARQLTVQMMQNPQ
EVEKYQQLQKDLSKSM	QHAAPSPVQHQAGQAP	ERAYQKQPTIFQNKKR
VQRTLLEK________	AGQAPHLGSGQPQQNL	RAYQKQPTIFQNKKRV
QKLINPVKTSRNHQDL	PVFAPMLQSNPRMLTS	YQKQPTIFQNKKRVLL
SKHKSSLNSSPWSGLM	FKNTRTNEKVELQELN	QKQPTIFQNKKRVLLG
KSSLNSSPWSGLMALG	RTNEKVELQELNDRFA	QPTIFQNKKRVLLGET
AEQVALSRTQVCGILR	DLTKLHQLAMQQSHFP	SLDELIRKRGAAAKGR
QVALSRTQVCGILREE	LTKLHQLAMQQSHFPM	ELIRKRGAAAKGRLNA
WDTVTVLRKKGPTAAQ	DVKFGADARALMLQGV	LIRKRGAAAKGRLNAR
DTVTVLRKKGPTAAQA	VKFGADARALMLQGVD	IRKRGAAAKGRLNARP
TVLRKKGPTAAQAKSK	KFGADARALMLQGVDL	KRGAAAKGRLNARPGV
DKLYRVEYAKSGRASC	FGADARALMLQGVDLL	LDDIIKLNRSQRGGRG
EERSLDNFFAKRDKKK	DARALMLQGVDLLADA	AKLKKTETQEKNTLPT
SLDNFFAKRDKKKKKE	HKELAPYDENWFYTRA	KETIEQEKRSEIS___
DNFFAKRDKKKKKERS	AQIREIQGKKAALDEA	EERKQKFLRLMGAGKK
NFFAKRDKKKKKERSN	NAEKELTDRNWDQEDE	ERKQKFLRLMGAGKKE
FFAKRDKKKKKERSNR	TPELYAELRAKSTPSG	QKFLRLMGAGKKEHTG
VDKVTGRFNGQFKTYA	RADATNVNNWHWTERD	EKLDNQRLKNFKNKGR
FNGQFKTYAICGAIRR	ALEIANAHRKPLVIIA	QRLKNFKNKGRDLETM
EQKKKRTFRKFTYRGV	KKLNFDQA________	TPAALAALSLTGSGTP
VALNPQNTVFDAKRLI	PSTSRSLYASSPGGVY	LTAASTAPISFGFTRT
VAMNPTNTVFDAKRLI	KEDAEEKQ________	AASTAPISFGFTRTSA
AALAALSLTGSGTPPT	AVAAELVSADKIEDVP	SKLDYKPV________
TKDGNVLLHEMQIQHP	DVPAPSTSADKVESLD	SLQYEYKANSNLVLQA
GLGLEFQA________	VTERVLAPASTLQSSY	ANSNLVLQADRSLIDR
SKAIGSSPLGSGEGLL	LNEKLVNL________	GETVGKTDYIPLLDVD
RKFLPLFDRVLVERSA	EVVQKEQE________	VGKTDYIPLLDVDEKT
GLYSPQYISYIPQIHM	QKIEKQYDADLEQILI	KTDYIPLLDVDEKTGN
FEDADVDH________	AEEKKDEKKEESEESD	METKIKNYKTAPFDSR
SGHRLELLAAYEEVIR	GAVATKVRRHDMRVHP	ETKIKNYKTAPFDSRF
APAIESVD________	APNKRRRY________	KIKSVGGACVLVA___
SATGVPTV________	DRVGQTIERMGSGVER	FRKGGPDDRGMGSSRE
QHAAPSPVQHQAGQAP	EDLLLQDFSRNLSAKS	GQLVGVDLNTGEPMVA
AGQAPHLGSGQPQQNL	PGGPHSYH________	EVEKYQQLQKDLSKSM
PVFAPMLQSNPRMLTS	GPTIEEVD________	RQIAAKIDSIPHLNNS
FKNTRTNEKVELQELN	EQRSTQTRRYPSSISS	VQRTLLEK________
RTNEKVELQELNDRFA	GGALGHHV________	PELIRPQKLINPVKTS
DLTKLHQLAMQQSHFP	AVIQHRPSRQYATLDV	QKLINPVKTSRNHQDL
LTKLHQLAMQQSHFPM	VIQHRPSRQYATLDVY	SKHKSSLNSSPWSGLM
DVKFGADARALMLQGV	QHRPSRQYATLDVYNP	KSSLNSSPWSGLMALG
VKFGADARALMLQGVD	GAASEAGRAMHLMKKR	IDDHFLFDKPVSPLLL
KFGADARALMLQGVDL	ASEAGRAMHLMKKREK	AEQVALSRTQVCGILR
FGADARALMLQGVDLL	TAILKQKNRPNRLIVD	QVALSRTQVCGILREE
ADARALMLQGVDLLAD	GGGGGKIRTRRCHQGP	WDTVTVLRKKGPTAAQ
DARALMLQGVDLLADA	GGGGKIRTRRCHQGPI	DTVTVLRKKGPTAAQA
LMLQGVDLLADAVAVT	GGGKIRTRRCHQGPIK	TVLRKKGPTAAQAKSK
HKELAPYDENWFYTRA	EREIMLAAKKGLDPYN	DKLYRVEYAKSGRASC
EAQIREIQGKKAALDE	PAPDFKATAVVDGAFK	EERSLDNFFAKRDKKK
AQIREIQGKKAALDEA	VSDGVIKVFNDMKVRK	SLDNFFAKRDKKKKKE
NAEKELTDRNWDQEDE	SDGVIKVFNDMKVRKS	DNFFAKRDKKKKKERS
EERADATNVNNWHWTE	NDMKVRKSSTPEEVKK	NFFAKRDKKKKKERSN
RADATNVNNWHWTERD	EYFQKVNQ________	VDKVTGRFNGQFKTYA
ALEIANAHRKPLVIIA	FKKKTVDDVIKEQNRE	FNGQFKTYAICGAIRR
PSTSRSLYASSPGGVY	IKEQNRELRGTQRAII	EQKKKRTFRKFTYRGV
KEDAEEKQ________	KEQNRELRGTQRAIIR	ANLRKVLISDSLDPCC
AVAAELVSADKIEDVP	EQNRELRGTQRAIIRD	QAIKALLQ________
DVPAPSTSADKVESLD	EERAETARLTSFIGAI	ANVSVVDLTCRLEKPA
VTERVLAPASTLQSSY	RAETARLTSFIGAIAI	VALNPQNTVFDAKRLI
EVVQKEQE________	AETARLTSFIGAIAIG	VAMNPTNTVFDAKRLI
AEEKKDEKKEESEESD	ARLTSFIGAIAIGDLV	KLDPELDS________
GAVATKVRRHDMRVHP	QQATQSYGAYPTQPGQ	AALAALSLTGSGTPPT
APNKRRRY________	EILLTELQGDSRSLPF	TKDGNVLLHEMQIQHP
DRVGQTIERMGSGVER	ASNRIIGAKDHASIQM	FVDLYVPRKCSASNRI
EDLLLQDFSRNLSAKS	AATSVAAARKGAEPSG	GLGLEFQA________
PGGPHSYH________	ESQFEMDI________	AQKAQKAK________
TTEVKSVEMHHEALSE	VKELEKRASGQAFELI	SKAIGSSPLGSGEGLL
GPTIEEVD________	ELEKRASGQAFELILS	FEDADVDH________
EQRSTQTRRYPSSISS	LEKRASGQAFELILSP	APAIESVD________
GGALGHHV________	EKRASGQAFELILSPR	SATGVPTV________
QSKETLLQSYNKRLKD	KRASGQAFELILSPRS	AGQAPHLGSGQPQQNL
AVIQHRPSRQYATLDV	RASGQAFELILSPRSK	FKNTRTNEKVELQELN
VIQHRPSRQYATLDVY	ASGQAFELILSPRSKE	RTNEKVELQELNDRFA
QHRPSRQYATLDVYNP	SGQAFELILSPRSKES	DLTKLHQLAMQQSHFP
GAASEAGRAMHLMKKR	GQAFELILSPRSKESV	LTKLHQLAMQQSHFPM
ASEAGRAMHLMKKREK	QAFELILSPRSKESVP	DVKFGADARALMLQGV
ISNLLEKMTSSDKDFR	SKNAEVTGTMSQDTEV	VKFGADARALMLQGVD
TAILKQKNRPNRLIVD	EIETLDDY________	KFGADARALMLQGVDL
GGGGGKIRTRRCHQGP	DSKRGEAPFAQRIDPT	FGADARALMLQGVDLL
GGGGKIRTRRCHQGPI	KRGEAPFAQRIDPTRE	GADARALMLQGVDLLA
GGGKIRTRRCHQGPIK	SVLVLIVGLSTVGAGA	ADARALMLQGVDLLAD
LEREIMLAAKKGLDPY	GEEAEEEA________	DARALMLQGVDLLADA
EREIMLAAKKGLDPYN	EVLNIGKKLYEGKTKE	LMLQGVDLLADAVAVT
PAPDFKATAVVDGAFK	LNIGKKLYEGKTKEVY	QGVDLLADAVAVTMGP
VSDGVIKVFNDMKVRK	GKKLYEGKTKEVYELL	HKELAPYDENWFYTRA
SDGVIKVFNDMKVRKS	DELATKLSRRLQMEGE	EAQIREIQGKKAALDE
VFNDMKVRKSSTPEEV	KVKADTNGIIKTSTTA	AQIREIQGKKAALDEA
NDMKVRKSSTPEEVKK	IDDVVNTR________	NAEKELTDRNWDQEDE
EYFQKVNQ________	PLDFPSKKRKRSRWNQ	EERADATNVNNWHWTE
FKKKTVDDVIKEQNRE	AAVSHWQQQSYLDSGI	RADATNVNNWHWTERD
IKEQNRELRGTQRAII	AVSHWQQQSYLDSGIH	ALEIANAHRKPLVIIA
KEQNRELRGTQRAIIR	EEHGGLVRKKPPPAPE	KKLNFDQA________
EQNRELRGTQRAIIRD	PAEDKKKD________	PSTSRSLYASSPGGVY
EERAETARLTSFIGAI	AAGAGKVTKSAQKAQK	KEDAEEKQ________
RAETARLTSFIGAIAI	AGKVTKSAQKAQKAK_	AVAAELVSADKIEDVP
AETARLTSFIGAIAIG	PTVIDEVRTGTYRQLF	DVPAPSTSADKVESLD
ARLTSFIGAIAIGDLV	GEIQPVSVKVGDKVLL	VTERVLAPASTLQSSY
TQQATQSYGAYPTQPG	IKAVDKKAAGAGKVTK	LNEKLVNL________
QQATQSYGAYPTQPGQ	VPPVHDIYRARQQKRI	EVVQKEQE________
EILLTELQGDSRSLPF	LPKKTESHHKTK____	AEEKKDEKKEESEESD
ASNRIIGAKDHASIQM	NLADSRTPAAAAAMNL	GAVATKVRRHDMRVHP
TAVAPSAVNLADPRTP	SRQVPVMQGTGMQGAS	APNKRRRY________
AATSVAAARKGAEPSG	VKVPQKNS________	DRVGQTIERMGSGVER
ESQFEMDI________	EEGFEGGD________	EDLLLQDFSRNLSAKS
VKELEKRASGQAFELI	GIRDHESL________	PGGPHSYH________
KELEKRASGQAFELIL	QTETKTITYESPQIDG	VHVVPDQLMAFGGSSE
ELEKRASGQAFELILS	ASEKESVM________	GPTIEEVD________
LEKRASGQAFELILSP	EKSLKSLKDKNKKLEE	EQRSTQTRRYPSSISS
EKRASGQAFELILSPR	KQKTDEDD________	GGALGHHV________
KRASGQAFELILSPRS	PEWKKRKI________	LYVDKNFINNPLAQAD
RASGQAFELILSPRSK	EEERAQRPRLQLKPRT	QSKETLLQSYNKRLKD
ASGQAFELILSPRSKE	AKTGKFLKRFTDEESR	AVIQHRPSRQYATLDV
SGQAFELILSPRSKES	MDFREPTEEERAQRPR	VIQHRPSRQYATLDVY
GQAFELILSPRSKESV	FGDLGRPGRGGRGGRG	QHRPSRQYATLDVYNP
QAFELILSPRSKESVP	KDEPQRRSARLSAKPA	GAASEAGRAMHLMKKR
SKNAEVTGTMSQDTEV	KEIEQKYDCGEEILIT	ASEAGRAMHLMKKREK
EIETLDDY________	FKRSRNTDEMVELRIL	ISNLLEKMTSSDKDFR
DSKRGEAPFAQRIDPT	KSSHSQYN________	TAILKQKNRPNRLIVD
KRGEAPFAQRIDPTRE	DQLKVHGF________	GGGGGKIRTRRCHQGP
REKLTPEQLHSMRQAE	GKIIDRRPERRPPRER	GGGGKIRTRRCHQGPI
SVLVLIVGLSTVGAGA	EAMNEIRAKKRLRQSG	GGGKIRTRRCHQGPIK
QGYAQTTQAYGQQSYG	PEAFPALA________	LEREIMLAAKKGLDPY
RTRRKVLSRAVAAATY	IAQGIGKLASVPAGGA	EREIMLAAKKGLDPYN
GEEAEEEA________	ASSPSKANGQENGHVK	PAPDFKATAVVDGAFK
EVLNIGKKLYEGKTKE	SSPSKANGQENGHVKV	VSDGVIKVFNDMKVRK
LNIGKKLYEGKTKEVY	SKANGQENGHVKVNGD	SDGVIKVFNDMKVRKS
GKKLYEGKTKEVYELL	RKGTGLLSSDYRIING	VFNDMKVRKSSTPEEV
YEGKTKEVYELLDSPG	ETSKKWAAGQNKQHSI	EYFQKVNQ________
DELATKLSRRLQMEGE	DVAAFNKI________	FKKKTVDDVIKEQNRE
IDDVVNTR________	ARSIAKEGFEKISKGA	KEQNRELRGTQRAIIR
PLDFPSKKRKRSRWNQ	EIKDFLLTARRKDAKS	EQNRELRGTQRAIIRD
AAVSHWQQQSYLDSGI	LEREIMLAAKKGLDPY	EERAETARLTSFIGAI
AVSHWQQQSYLDSGIH	DLGNVTADKDGVADVS	RAETARLTSFIGAIAI
EEHGGLVRKKPPPAPE	FIQRGGPE________	AETARLTSFIGAIAIG
PAEDKKKD________	GVDALSNI________	ARLTSFIGAIAIGDLV
AAGAGKVTKSAQKAQK	ARNSLYDMARYEREQY	TQQATQSYGAYPTQPG
AGKVTKSAQKAQKAK_	PTGTYHGDSDLQLERI	QQATQSYGAYPTQPGQ
PTVIDEVRTGTYRQLF	KTIAPALVSKKLNVTE	EILLTELQGDSRSLPF
GEIQPVSVKVGDKVLL	TDLNPDNLQGGDDLDP	ASNRIIGAKDHASIQM
IKAVDKKAAGAGKVTK	DTQFPSLQSTAKHVES	TAVAPSAVNLADPRTP
VPPVHDIYRARQQKRI	HIEEVRKNKESKDPAD	AATSVAAARKGAEPSG
LPKKTESHHKTK____	GEEEGEEY________	ESQFEMDI________
NLADSRTPAAAAAMNL	EIIEGMKFDRGYISPY	VKELEKRASGQAFELI
SRQVPVMQGTGMQGAS	QERKKVVDTTKESSRK	KELEKRASGQAFELIL
GHNNLIPLANTGIVNH	KKVVDTTKESSRKGWE	LEKRASGQAFELILSP
VKVPQKNS________	AGPSRAVRQSVTSFPD	EKRASGQAFELILSPR
EEGFEGGD________	PPPEPARI________	KRASGQAFELILSPRS
GIRDHESL________	TGKEDAANNYARGHYT	RASGQAFELILSPRSK
QTETKTITYESPQIDG	GKEDAANNYARGHYTI	ASGQAFELILSPRSKE
ASEKESVM________	IMNQEKLAKLQAQVRI	SGQAFELILSPRSKES
EKSLKSLKDKNKKLEE	QEKLAKLQAQVRIGGK	GQAFELILSPRSKESV
KQKTDEDD________	QVINETSQHHDDLE__	QAFELILSPRSKESVP
PEWKKRKI________	DKVTGRFNGQFKTYAI	SKNAEVTGTMSQDTEV
EEERAQRPRLQLKPRT	GQFKTYAICGAIRRMG	EIETLDDY________
AKTGKFLKRFTDEESR	LKEALTYDGALLGDRS	DSKRGEAPFAQRIDPT
MDFREPTEEERAQRPR	KQEPDPTW________	KRGEAPFAQRIDPTRE
AEKLEALSVKEETKED	TYAEQSYEGYEGYYSQ	REKLTPEQLHSMRQAE
FGDLGRPGRGGRGGRG	RRGRPVGFPMRGRGGF	SVLVLIVGLSTVGAGA
KDEPQRRSARLSAKPA	TEQPVRKNKMASNIFG	QGYAQTTQAYGQQSYG
DEVRTGTYRQLFHPEQ	KPVSPLLLASGMARDW	RTRRKVLSRAVAAATY
KEIEQKYDCGEEILIT	RDKDLKVNRFDEAQKK	GEEAEEEA________
FKRSRNTDEMVELRIL	SRGNPTVEVDLFTSKG	EVLNIGKKLYEGKTKE
KSSHSQYN________	KSTNVIVDSGGFDELG	VLNIGKKLYEGKTKEV
DQLKVHGF________	TPTLVVPHRTDGFAEA	LNIGKKLYEGKTKEVY
GKIIDRRPERRPPRER	SPAGLQVLNDYLADKS	GKKLYEGKTKEVYELL
EAMNEIRAKKRLRQSG	GPGTASRPSSSRSYVT	YEGKTKEVYELLDSPG
PEAFPALA________	PGTASRPSSSRSYVTT	KTKEVYELLDSPGKVL
IAQGIGKLASVPAGGA	GTASRPSSSRSYVTTS	DELATKLSRRLQMEGE
ASSPSKANGQENGHVK	TASRPSSSRSYVTTST	TPEQPGLNGAAAAAAG
SSPSKANGQENGHVKV	PFLGQHGFNFFPSGID	KVKADTNGIIKTSTTA
SKANGQENGHVKVNGD	QAKARPENKQHKQTLS	LVHPKALPLIVGAQLI
RKGTGLLSSDYRIING	EVDMESHRNANAEPAV	IDDVVNTR________
DDWNGTRPSLKAPPAR	TYQGERAYQHGGVTGL	PLDFPSKKRKRSRWNQ
ETSKKWAAGQNKQHSI	NEHQLSLRTVSLGAGA	AAVSHWQQQSYLDSGI
DVAAFNKI________	GGLGGGLGNVLGGLIS	AVSHWQQQSYLDSGIH
ARSIAKEGFEKISKGA	LEKQNHTPRKHHQHHH	EEHGGLVRKKPPPAPE
EIKDFLLTARRKDAKS	EKKISSIQSIVPALEI	PAEDKKKD________
DLGNVTADKDGVADVS	GRDSGPPTKKIRSSPR	AAGAGKVTKSAQKAQK
FIQRGGPE________	RDSGPPTKKIRSSPRE	AGKVTKSAQKAQKAK_
GVDALSNI________	DSGPPTKKIRSSPREA	PTVIDEVRTGTYRQLF
ARNSLYDMARYEREQY	SGPPTKKIRSSPREAK	GEIQPVSVKVGDKVLL
PTGTYHGDSDLQLERI	GPPTKKIRSSPREAKN	IKAVDKKAAGAGKVTK
KTIAPALVSKKLNVTE	SSPREAKNKRRSGKNS	VPPVHDIYRARQQKRI
TDLNPDNLQGGDDLDP	SESTPIAETIMASSNE	LPKKTESHHKTK____
DTQFPSLQSTAKHVES	INEELESQYQQSMDSK	NLADSRTPAAAAAMNL
HIEEVRKNKESKDPAD	SQNARHLQGGEKQRVF	SRQVPVMQGTGMQGAS
GEEEGEEY________	VRKNKMASNIFGTPEE	VKVPQKNS________
SDSNLHDA________	DVWSLEPEDLSAVTME	EEGFEGGD________
EIIEGMKFDRGYISPY	HVPRAVFVDLEPTVID	GIRDHESL________
SPGKVLLQSKDQITAG	HTGRLVIGDHKSTSHF	QTETKTITYESPQIDG
QERKKVVDTTKESSRK	AEGAGDAK________	ASEKESVM________
KKVVDTTKESSRKGWE	AAEDDEDDDVDTKKQK	EKSLKSLKDKNKKLEE
AGPSRAVRQSVTSFPD	DRRRRDKFRRERSDYD	KQKTDEDD________
PPPEPARI________	EREARRLR________	PEWKKRKI________
TGKEDAANNYARGHYT	KVKKERDS________	FKTPRGPV________
GKEDAANNYARGHYTI	SDSNLHDA________	EEERAQRPRLQLKPRT
IMNQEKLAKLQAQVRI	KSPAGLQVLNDYLADK	AKTGKFLKRFTDEESR
QEKLAKLQAQVRIGGK	AGLQVLNDYLADKSYI	MDFREPTEEERAQRPR
QVINETSQHHDDLE__	GYGGRSRY________	AEKLEALSVKEETKED
DKVTGRFNGQFKTYAI	RIPKVQKLLQDFFNGR	FGDLGRPGRGGRGGRG
GQFKTYAICGAIRRMG	SQASAAARNSLYDMAR	KDEPQRRSARLSAKPA
LKEALTYDGALLGDRS	SQIQETSI________	DEVRTGTYRQLFHPEQ
KQEPDPTW________	QLYWSHPRKFGQGSRS	KEIEQKYDCGEEILIT
TYAEQSYEGYEGYYSQ	GLAVKELK________	FKRSRNTDEMVELRIL
RRGRPVGFPMRGRGGF	TSSTRVTKHSTVQHSY	KSSHSQYN________
KPVSPLLLASGMARDW	MVGLANLHAMGIAPPK	DQLKVHGF________
RDKDLKVNRFDEAQKK	KEEIDILSDACSKLQE	GKIIDRRPERRPPRER
SRGNPTVEVDLFTSKG	QGLLSQLQGQSKDMPP	EAMNEIRAKKRLRQSG
KSTNVIVDSGGFDELG	GSRNMGGPYGGGNYGP	PEAFPALA________
AIHSPQVAGVPRFRFG	APTSSKQHGVNVSVNA	IAQGIGKLASVPAGGA
SPAGLQVLNDYLADKS	SKQHGVNVSVNASATP	PDVKGAVLVCDMSSNF
GPGTASRPSSSRSYVT	QHGVNVSVNASATPFQ	ASSPSKANGQENGHVK
PGTASRPSSSRSYVTT	KLPEMDID________	SSPSKANGQENGHVKV
GTASRPSSSRSYVTTS	VSKNQALKLQLDNQYA	SKANGQENGHVKVNGD
TASRPSSSRSYVTTST	QESSEEEQ________	RKGTGLLSSDYRIING
PFLGQHGFNFFPSGID	DRGAGSIREAGGAFGK	ETSKKWAAGQNKQHSI
QAKARPENKQHKQTLS	GAGSIREAGGAFGKRE	DVAAFNKI________
EVDMESHRNANAEPAV	SRQLYVLGHEAMKRLQ	ARSIAKEGFEKISKGA
TYQGERAYQHGGVTGL	LQNSVKQYSGKFF___	SKEEETKK________
NEHQLSLRTVSLGAGA	AQSAGTVRSAAPPQEK	EIKDFLLTARRKDAKS
GGLGNVLGGLISGAGG	PEKTQESL________	DIAAFNKI________
LEKQNHTPRKHHQHHH	QKLTLQPVDNSTISLQ	DLGNVTADKDGVADVS
EKKISSIQSIVPALEI	DNSTISLQMGTNKVAS	FIQRGGPE________
GRDSGPPTKKIRSSPR	GMTGYGMPRQIL____	GVDALSNI________
RDSGPPTKKIRSSPRE	YGMPRQIL________	PTGTYHGDSDLQLERI
DSGPPTKKIRSSPREA	KAVDKKAAGAGKVTKS	KTIAPALVSKKLNVTE
SGPPTKKIRSSPREAK	DKKAAGAGKVTKSAQK	TDLNPDNLQGGDDLDP
GPPTKKIRSSPREAKN	VKDGKTLNDELEIIEG	DTQFPSLQSTAKHVES
SSPREAKNKRRSGKNS	KGVLKAVDHINSTIAP	HIEEVRKNKESKDPAD
SESTPIAETIMASSNE	DSVDFSLADAINTEFK	GEEEGEEY________
INEELESQYQQSMDSK	EGPSDIPD________	EIIEGMKFDRGYISPY
QEGKNVIGLQMGTNRG	NIAGSRTAAALAPASL	EELGLDKV________
IGLQMGTNRGASQAGM	AWNKDRTQIAICPNNH	SPGKVLLQSKDQITAG
SQNARHLQGGEKQRVF	KEDSKTFDQLTPDESK	QERKKVVDTTKESSRK
VRKNKMASNIFGTPEE	LSVAEITNACFEPANQ	KKVVDTTKESSRKGWE
DVWSLEPEDLSAVTME	VKFLAQTA________	AGPSRAVRQSVTSFPD
DEKMPDLE________	GDSDLQLERINVYYNE	PPPEPARI________
HTGRLVIGDHKSTSHF	GDSDLQLDRISVYYNE	TGKEDAANNYARGHYT
YGMPRQIL________	NTFFSETGAGKHVPRA	GKEDAANNYARGHYTI
AEGAGDAK________	HEEEIVHHKKEIERLQ	IMNQEKLAKLQAQVRI
AAEDDEDDDVDTKKQK	PADETEAD________	QEKLAKLQAQVRIGGK
DRRRRDKFRRERSDYD	PKMQTDKPFDQTTISL	QVINETSQHHDDLE__
EREARRLR________	LKLRFPAEDEFPDLSA	DKVTGRFNGQFKTYAI
TEQPVRKNKMASNIFG	EYGEVIQLQGDQRKNI	GQFKTYAICGAIRRMG
KSPAGLQVLNDYLADK	KVPDFSEYRRLEVLDS	LKEALTYDGALLGDRS
AGLQVLNDYLADKSYI	EGPGKNLPFSVENKWS	KQEPDPTW________
RIPKVQKLLQDFFNGR	SSGLPNRLPPGAVPPG	VGATTDWS________
SQASAAARNSLYDMAR	VPPGARFDPFGPIGTS	RRGRPVGFPMRGRGGF
SQIQETSI________	VDDERKLRTFYEKRMA	TEQPVRKNKMASNIFG
QLYWSHPRKFGQGSRS	IEVNVELRKAKKDDQM	KPVSPLLLASGMARDW
EELGLDKV________	FYRQILGDVLLKDRMS	RDKDLKVNRFDEAQKK
GLAVKELK________	GQVINETSQHHDDLE_	SRGNPTVEVDLFTSKG
TSSTRVTKHSTVQHSY	SQHHDDLE________	KSTNVIVDSGGFDELG
MVGLANLHAMGIAPPK	GDKPKVQVSYKGETKA	TPTLVVPHRTDGFAEA
KEEIDILSDACSKLQE	INISGNGF________	AIHSPQVAGVPRFRFG
QGLLSQLQGQSKDMPP	EELAAKEKANEDAVPL	SPAGLQVLNDYLADKS
GSRNMGGPYGGGNYGP	LNQVARQQSHFAMMHG	GPGTASRPSSSRSYVT
GYGGRSRY________	TEFSDIPRRAPKKPLT	PGTASRPSSSRSYVTT
APTSSKQHGVNVSVNA	SGSSKGGPLQALTRES	GTASRPSSSRSYVTTS
SKQHGVNVSVNASATP	TEDTEAKKRKRAERFG	TASRPSSSRSYVTTST
QHGVNVSVNASATPFQ	GKVTKSAQKAQKAK__	PFLGQHGFNFFPSGID
VSKNQALKLQLDNQYA	IGKTLAEKSRGLFSAN	EVDMESHRNANAEPAV
QESSEEEQ________	AEKSRGLFSANDWQCK	TYQGERAYQHGGVTGL
DRGAGSIREAGGAFGK	VHSGALND________	NEHQLSLRTVSLGAGA
GAGSIREAGGAFGKRE	DIGFIKLD________	GGLGGGLGNVLGGLIS
AQSAGTVRSAAPPQEK	KEKKEVVEEAENGRDA	GGLGNVLGGLISGAGG
PEKTQESL________	RIAKEEGA________	LEKQNHTPRKHHQHHH
QKLTLQPVDNSTISLQ	KDVNQQEFVRALAAFL	EKKISSIQSIVPALEI
DNSTISLQMGTNKVAS	DVNQQEFVRALAAFLK	GRDSGPPTKKIRSSPR
GMTGYGMPRQIL____	GEDEGEEY________	RDSGPPTKKIRSSPRE
KAVDKKAAGAGKVTKS	DENEHQLSLRTVSLGA	DSGPPTKKIRSSPREA
DKKAAGAGKVTKSAQK	KRQEQIAKRRRLSSLR	SGPPTKKIRSSPREAK
VKDGKTLNDELEIIEG	IGEELAIHNRGKEGYI	GPPTKKIRSSPREAKN
KGVLKAVDHINSTIAP	KEHYQVLE________	SSPREAKNKRRSGKNS
DSVDFSLADAINTEFK	AQMAAKLERLREKDKH	SESTPIAETIMASSNE
EGPSDIPD________	KKFVEEQHTKKSEAAV	INEELESQYQQSMDSK
NIAGSRTAAALAPASL	TIMNQEKLAKLQAQVR	IGLQMGTNRGASQAGM
AWNKDRTQIAICPNNH	HLNVQVSNFKSGKGDS	VRKNKMASNIFGTPEE
KEDSKTFDQLTPDESK	GDVLTLLESEREARRL	DVWSLEPEDLSAVTME
LSVAEITNACFEPANQ	FMNTSSLRRNRR____	DEKMPDLE________
VKFLAQTA________	PENLPQILLQLKRRRT	HTGRLVIGDHKSTSHF
GDSDLQLERINVYYNE	VTKSAQKAQKAK____	YGMPRQIL________
GDSDLQLDRISVYYNE	TKSAQKAQKAK_____	AEGAGDAK________
HEEEIVHHKKEIERLQ	KSAQKAQKAK______	AAEDDEDDDVDTKKQK
PADETEAD________	LEENEAGD________	DRRRRDKFRRERSDYD
PKMQTDKPFDQTTISL	GDELRTEPEAKKSKTA	EREARRLR________
LKLRFPAEDEFPDLSA	TEPEAKKSKTAAKKND	KVKKERDS________
EGPGKNLPFSVENKWS	QIHDIVLVGGSTRIPK	SDSNLHDA________
SSGLPNRLPPGAVPPG	SVKEETKEDAEEKQ__	SSAYGKLYRGPTRVPP
VPPGARFDPFGPIGTS	DEFPDLSAHNNHMAKV	KSPAGLQVLNDYLADK
VDDERKLRTFYEKRMA	VANNTNEEAGDGTTTA	SGNFGGSRNMGGPYGG
IEVNVELRKAKKDDQM	QTVNVDEN________	GYGGRSRY________
FYRQILGDVLLKDRMS	PKEEESPV________	RIPKVQKLLQDFFNGR
GQVINETSQHHDDLE_	ELDAQLDAYNARMDTS	SQASAAARNSLYDMAR
SQHHDDLE________	KYKNIGAKLVQDVANN	SQIQETSI________
GDKPKVQVSYKGETKA	TLDDVIQTGVDNPGHP	QLYWSHPRKFGQGSRS
INISGNGF________	IHATTYIPLMDNADSS	GLAVKELK________
EELAAKEKANEDAVPL	VPRAVFVDLEPTVIDE	TSSTRVTKHSTVQHSY
LNQVARQQSHFAMMHG	SPGKVLLQSKDQITAG	MVGLANLHAMGIAPPK
TEFSDIPRRAPKKPLT	NDSSNLDPSQAPSLAQ	KEEIDILSDACSKLQE
SGSSKGGPLQALTRES	GAAKEEPKRRSARLSA	QGLLSQLQGQSKDMPP
TEDTEAKKRKRAERFG	AAKEEPKRRSARLSAK	GSRNMGGPYGGGNYGP
GKVTKSAQKAQKAK__	GTPPTAANYPSSSRTP	APTSSKQHGVNVSVNA
IGKTLAEKSRGLFSAN	GDLAGRYYALKSMTEA	SKQHGVNVSVNASATP
AEKSRGLFSANDWQCK	LAKLNQVARQQSHFAM	QHGVNVSVNASATPFQ
VHSGALND________	AKLNQVARQQSHFAMM	KLPEMDID________
DIGFIKLD________	NQVARQQSHFAMMHGG	VSKNQALKLQLDNQYA
KEKKEVVEEAENGRDA	QVARQQSHFAMMHGGT	QESSEEEQ________
KDVNQQEFVRALAAFL	LDRIAGQVAAANKKH_	DRGAGSIREAGGAFGK
DVNQQEFVRALAAFLK	NFGDLGRPGRGGRGGR	GAGSIREAGGAFGKRE
GEDEGEEY________	ADSQPPVFKVFPGSTT	SRQLYVLGHEAMKRLQ
DENEHQLSLRTVSLGA	SQIKQEPDPTW_____	LQNSVKQYSGKFF___
KRQEQIAKRRRLSSLR	LGDGPKLVRELFRVAE	AQSAGTVRSAAPPQEK
IGEELAIHNRGKEGYI	KERELELKNTWSENKL	PEKTQESL________
KEHYQVLE________	VINETSQHHDDLE___	QKLTLQPVDNSTISLQ
KKFVEEQHTKKSEAAV	EKEAADRKRKQEEQME	DNSTISLQMGTNKVAS
TIMNQEKLAKLQAQVR	DKGKNVRQRNSS____	GMTGYGMPRQIL____
HLNVQVSNFKSGKGDS	EIPKEEKDPGMGAMGG	KAVDKKAAGAGKVTKS
GGLGGGLGNVLGGLIS	EELGLDKV________	DKKAAGAGKVTKSAQK
GDVLTLLESEREARRL	RKSSLVTSKLAGGQVE	VKDGKTLNDELEIIEG
FMNTSSLRRNRR____	KLAGGQVE________	KGVLKAVDHINSTIAP
KDFLLTARRKDAKSVK	QEKRSEIS________	DSVDFSLADAINTEFK
PENLPQILLQLKRRRT	DSLIKGKK________	EGPSDIPD________
TKSAQKAQKAK_____	ADAVAVTMGPKGRTVI	NIAGSRTAAALAPASL
KSAQKAQKAK______	QTVVGTYHGSPDQSHQ	AWNKDRTQIAICPNNH
LEENEAGD________	SHQVTGNHQQPPQQNT	KEDSKTFDQLTPDESK
GDELRTEPEAKKSKTA	PVQATQNKTGKYVPPS	LSVAEITNACFEPANQ
TEPEAKKSKTAAKKND	KEKAEKLKQSLPPGLA	VKFLAQTA________
QIHDIVLVGGSTRIPK	VQLTEIKPLLNDKNGT	GDSDLQLERINVYYNE
SVKEETKEDAEEKQ__	LTEIKPLLNDKNGTRN	GDSDLQLDRISVYYNE
LEDGPKFLKSGDAAIV	RAQRPRLQLKPRTVAT	NTFFSETGAGKHVPRA
DEFPDLSAHNNHMAKV	PDIAVGTKRGSDELFS	HEEEIVHHKKEIERLQ
VANNTNEEAGDGTTTA	KTGALLLQGFIQDRAG	PADETEAD________
QTVNVDEN________	ESTRRILGLAIESQDA	PKMQTDKPFDQTTISL
PKEEESPV________	SRVQPIKLARVTKVLG	EYGEVIQLQGDQRKNI
ELDAQLDAYNARMDTS	TKVLGRTGSQGQCTQV	EGPGKNLPFSVENKWS
LRLKPQLLQGVYAMGF	ASIANIVKSSLGPVGL	SSGLPNRLPPGAVPPG
KYKNIGAKLVQDVANN	QVARTHLTEDTPKVNA	VPPGARFDPFGPIGTS
TLDDVIQTGVDNPGHP	NEKINAEKSSKQKVDL	VDDERKLRTFYEKRMA
IHATTYIPLMDNADSS	GGASRFSASSGGGGSR	IEVNVELRKAKKDDQM
VPRAVFVDLEPTVIDE	AGNSEFLGKTPGQNAQ	FYRQILGDVLLKDRMS
NDSSNLDPSQAPSLAQ	KPDQQKLQALKDTANR	GQVINETSQHHDDLE_
GAAKEEPKRRSARLSA	SDSSPAVENEHPQETP	SQHHDDLE________
GTPPTAANYPSSSRTP	MKETIMNQEKLAKLQA	GDKPKVQVSYKGETKA
LAPASTLQSSYQIPTE	MNQEKLAKLQAQVRIG	INISGNGF________
GDLAGRYYALKSMTEA	FEEYIRVKARSVPQHR	EELAAKEKANEDAVPL
LAKLNQVARQQSHFAM	KQNHTPRKHHQHHHQQ	TEFSDIPRRAPKKPLT
NQVARQQSHFAMMHGG	HQELAKAQSGLAFQQT	SGSSKGGPLQALTRES
QVARQQSHFAMMHGGT	MREIVHLQAGQCGNQI	SLAEDDVE________
LDRIAGQVAAANKKH_	ISSDGESN________	TEDTEAKKRKRAERFG
ADSQPPVFKVFPGSTT	SDFQSNIA________	GKVTKSAQKAQKAK__
SQIKQEPDPTW_____	ANGGLALASIEDQGAA	IGKTLAEKSRGLFSAN
LGDGPKLVRELFRVAE	HAVSIAQDDAGADDWE	AEKSRGLFSANDWQCK
KERELELKNTWSENKL	FANYIDKVRFLEQQNK	VHSGALND________
VINETSQHHDDLE___	QSPSTSSRQVTGQPQN	DIGFIKLD________
EKEAADRKRKQEEQME	ANSRQQIRKLIKDGLI	KEKKEVVEEAENGRDA
DKGKNVRQRNSS____	HEYHAETIKNVRTATE	RIAKEEGA________
EIPKEEKDPGMGAMGG	SDAMKKVGRKGVITVK	KDVNQQEFVRALAAFL
SEDDEKLKKRKERFGI	DSDDVPRKRKLVPLDY	DVNQQEFVRALAAFLK
RKSSLVTSKLAGGQVE	SSSKKVTFGLNRNMTA	DENEHQLSLRTVSLGA
KLAGGQVE________	SSVCNILNDYGSQDSI	KRQEQIAKRRRLSSLR
QEKRSEIS________	ITSTRSLNYKSTSSGH	IGEELAIHNRGKEGYI
DSLIKGKK________	AVQSGKKKKKQKMVRA	KEHYQVLE________
ADAVAVTMGPKGRTVI	SYGSGRRF________	AQMAAKLERLREKDKH
QTVVGTYHGSPDQSHQ	SDPFEVLKAAENKKKE	KKFVEEQHTKKSEAAV
SHQVTGNHQQPPQQNT	VSSSSYNA________	TIMNQEKLAKLQAQVR
YNARMDTS________	SRIPAASAAAMNLASA	HLNVQVSNFKSGKGDS
PVQATQNKTGKYVPPS	RKAGPAKEQEPMPTVD	FMNTSSLRRNRR____
SVLASLGASVHKICTD	LLQDDISSSYTTTTTI	PENLPQILLQLKRRRT
KEKAEKLKQSLPPGLA	QDDISSSYTTTTTITA	VTKSAQKAQKAK____
ARANLTQASNLYSGQV	SSYTTTTTITAPPSRV	TKSAQKAQKAK_____
VQLTEIKPLLNDKNGT	SYTTTTTITAPPSRVL	KSAQKAQKAK______
LTEIKPLLNDKNGTRN	YTTTTTITAPPSRVLQ	LEENEAGD________
PDIAVGTKRGSDELFS	PPSRVLQNGGDKLETM	GDELRTEPEAKKSKTA
KTGALLLQGFIQDRAG	QNGGDKLETMPLYLED	TEPEAKKSKTAAKKND
ESTRRILGLAIESQDA	GDKLETMPLYLEDDIR	QIHDIVLVGGSTRIPK
EAEVTRTARKQSAQKR	KLETMPLYLEDDIRPD	SVKEETKEDAEEKQ__
VSNPRGRPSRGRPPKL	PDVHIMQHHVLPIQAR	LEDGPKFLKSGDAAIV
SRVQPIKLARVTKVLG	PRSGATAGAAGGRGKG	DEFPDLSAHNNHMAKV
TKVLGRTGSQGQCTQV	SGATAGAAGGRGKGAY	VANNTNEEAGDGTTTA
ASIANIVKSSLGPVGL	AGAAGGRGKGAYQDRD	QTVNVDEN________
QVARTHLTEDTPKVNA	GAAGGRGKGAYQDRDK	PKEEESPV________
NEKINAEKSSKQKVDL	AAGGRGKGAYQDRDKP	ELDAQLDAYNARMDTS
GGASRFSASSGGGGSR	AGGRGKGAYQDRDKPA	LRLKPQLLQGVYAMGF
AGNSEFLGKTPGQNAQ	DRDKPAQIRFSNISAA	KYKNIGAKLVQDVANN
SDSSPAVENEHPQETP	SNSHNALKLRFPAEDE	TLDDVIQTGVDNPGHP
MKETIMNQEKLAKLQA	NSHNALKLRFPAEDEF	VPRAVFVDLEPTVIDE
MNQEKLAKLQAQVRIG	EFPDLSAHNNHMAKVL	NDSSNLDPSQAPSLAQ
FEEYIRVKARSVPQHR	PGHLQEGFGCVVTNRF	GAAKEEPKRRSARLSA
KQNHTPRKHHQHHHQQ	SPSKAVAARAAGSTVR	AAKEEPKRRSARLSAK
HQELAKAQSGLAFQQT	AAGSTVRQRKNASCGT	GTPPTAANYPSSSRTP
MREIVHLQAGQCGNQI	LGKYGPADVEDTTGSG	LAPASTLQSSYQIPTE
ISSDGESN________	VKDVNQQEFVRALAAF	GDLAGRYYALKSMTEA
SDFQSNIA________	SEVDKKLKRKKQVAPE	LAKLNQVARQQSHFAM
HAVSIAQDDAGADDWE	SQGFKQRR________	AKLNQVARQQSHFAMM
FANYIDKVRFLEQQNK	FGGARPREEVVQKEQE	LNQVARQQSHFAMMHG
QSPSTSSRQVTGQPQN	PDEKTKKRIFQIHTSR	NQVARQQSHFAMMHGG
ANSRQQIRKLIKDGLI	LAGDLPVDMEFGEDLL	QVARQQSHFAMMHGGT
HEYHAETIKNVRTATE	EAEQGGAE________	LDRIAGQVAAANKKH_
SDAMKKVGRKGVITVK	KIEEIKDFLLTARRKD	NFGDLGRPGRGGRGGR
DSDDVPRKRKLVPLDY	IKDFLLTARRKDAKSV	DYISKVKE________
SSSKKVTFGLNRNMTA	AGPDKNLVTGDHIPTP	ADSQPPVFKVFPGSTT
DTYGQQWK________	DKNLVTGDHIPTPQDL	LGDGPKLVRELFRVAE
ITSTRSLNYKSTSSGH	LTTTPRRRPRAMDFF_	KERELELKNTWSENKL
AVQSGKKKKKQKMVRA	TNGSEISDSDYQAEYP	VINETSQHHDDLE___
SYGSGRRF________	PEPEPVKEEKLSPEPI	EKEAADRKRKQEEQME
SDPFEVLKAAENKKKE	GTGSQAQPQPAANQAL	DKGKNVRQRNSS____
VSSSSYNA________	GEKEAKSD________	EIPKEEKDPGMGAMGG
SRIPAASAAAMNLASA	FEPYLSPQARPNNAYT	GGMGGGMF________
RKAGPAKEQEPMPTVD	QARPNNAYTAMSDSYL	SEDDEKLKKRKERFGI
LLQDDISSSYTTTTTI	STSSHNLQSIFNIGSR	RKSSLVTSKLAGGQVE
QDDISSSYTTTTTITA	AIFGGARPREEVVQKE	KLAGGQVE________
DISSSYTTTTTITAPP	VGEKTEERRVERDILK	QEKRSEIS________
SSYTTTTTITAPPSRV	EQDVEKKK________	DSLIKGKK________
SYTTTTTITAPPSRVL	SPPQTKDQ________	QTVVGTYHGSPDQSHQ
YTTTTTITAPPSRVLQ	NETSQHHDDLE_____	SHQVTGNHQQPPQQNT
PPSRVLQNGGDKLETM	DTDKFKGFCYVEFDEV	YNARMDTS________
QNGGDKLETMPLYLED	APDDVDFF________	PVQATQNKTGKYVPPS
GDKLETMPLYLEDDIR	NMDEKGKQRNRRIFGL	KEKAEKLKQSLPPGLA
KLETMPLYLEDDIRPD	ELDDRADALQAGASQF	QARANLTQASNLYSGQ
PDVHIMQHHVLPIQAR	GHGRDLSAAGIGLLAA	LYRIGDLQAFQGHGAG
PRSGATAGAAGGRGKG	EHSSDPYHSGYEMPYA	VQLTEIKPLLNDKNGT
SGATAGAAGGRGKGAY	ENDNGTVRCEMPELVQ	LTEIKPLLNDKNGTRN
AGAAGGRGKGAYQDRD	EDGEPQQKRAHTEEPQ	RAQRPRLQLKPRTVAT
GAAGGRGKGAYQDRDK	TTEDTEAKKRKRAERF	PDIAVGTKRGSDELFS
AAGGRGKGAYQDRDKP	EDTEAKKRKRAERFGI	KTGALLLQGFIQDRAG
AGGRGKGAYQDRDKPA	EEAAGASPAKANGQEN	ERRQQVLDRYHRFKEL
DRDKPAQIRFSNISAA	GASPAKANGQENGHVK	EAEVTRTARKQSAQKR
DSEPFSNPLAPDGHDV	ASPAKANGQENGHVKS	VSNPRGRPSRGRPPKL
SNSHNALKLRFPAEDE	AKANGQENGHVKSNGD	ERNLQEIQQAGERLRS
NSHNALKLRFPAEDEF	KANGQENGHVKSNGDL	SRVQPIKLARVTKVLG
EFPDLSAHNNHMAKVL	QLLSGFPRRAFSEADM	ASIANIVKSSLGPVGL
PGHLQEGFGCVVTNRF	KIYGGRQRNGVMPSHF	QVARTHLTEDTPKVNA
GHLQEGFGCVVTNRFD	SISVQVNSIKFDSE__	NEKINAEKSSKQKVDL
SPSKAVAARAAGSTVR	ASSQTDLSQTISKKTV	GGASRFSASSGGGGSR
AAGSTVRQRKNASCGT	DLSQTISKKTVRSIQE	AGNSEFLGKTPGQNAQ
LGKYGPADVEDTTGSG	ASSQQGLAYATEAVYE	KPDQQKLQALKDTANR
VKDVNQQEFVRALAAF	KSNIDKKFSAHYDAVE	SDSSPAVENEHPQETP
SQGFKQRR________	AKVKDEPQRRSARLSA	MKETIMNQEKLAKLQA
FGGARPREEVVQKEQE	AKSVKIKKNKDNVKFK	MNQEKLAKLQAQVRIG
PDEKTKKRIFQIHTSR	GAEAKPAE________	AAATGTEAGPGTAGGS
LAGDLPVDMEFGEDLL	EDDEKLKKRKERFGIV	KQNHTPRKHHQHHHQQ
EAEQGGAE________	GKDGSKVTKQEPTRRS	HQELAKAQSGLAFQQT
ANGGLALASIEDQGAA	DDAYLNSPWADNTALK	MREIVHLQAGQCGNQI
GQRDLDRIAGQVAAAN	WADNTALKRHFHGVKD	ISSDGESN________
KIEEIKDFLLTARRKD	GSGGFHLAQQASASGS	SDFQSNIA________
AGPDKNLVTGDHIPTP	EEEIEVDSRVADNSFD	ANGGLALASIEDQGAA
DKNLVTGDHIPTPQDL	TPNSTPPRRVQTPLLR	FANYIDKVRFLEQQNK
LTTTPRRRPRAMDFF_	FTGFGKKARTFDLEAM	QSPSTSSRQVTGQPQN
TNGSEISDSDYQAEYP	EDTVTNGS________	ANSRQQIRKLIKDGLI
PEPEPVKEEKLSPEPI	TDEFEELEFLSTINVG	HEYHAETIKNVRTATE
GTGSQAQPQPAANQAL	KKINEELESQYQQSMD	SDAMKKVGRKGVITVK
GEKEAKSD________	PIPYEFMA________	DSDDVPRKRKLVPLDY
LNDDDFEPYLSPQARP	EEEKNFKAFASLRMAR	SSSKKVTFGLNRNMTA
FEPYLSPQARPNNAYT	SDNDDDTHVRMDFARR	SSVCNILNDYGSQDSI
QARPNNAYTAMSDSYL	ITVVKGIRLSENVIDR	DTYGQQWK________
AIFGGARPREEVVQKE	RESHPHGVKRSASPDD	ITSTRSLNYKSTSSGH
VGEKTEERRVERDILK	HPHGVKRSASPDDDLG	AVQSGKKKKKQKMVRA
KTEERRVERDILKEMF	TPPAKKLNFDQA____	SYGSGRRF________
EQDVEKKK________	PPAKKLNFDQA_____	SDPFEVLKAAENKKKE
SPPQTKDQ________	SPGGVYATRSSAVRLR	VSSSSYNA________
NETSQHHDDLE_____	VAIKAMAK________	SRIPAASAAAMNLASA
DTDKFKGFCYVEFDEV	AIPTAVNLADSRTPAA	RKAGPAKEQEPMPTVD
APDDVDFF________	EQRPKGQGNKVQNGSV	ERMGPVMDRMATGLER
NMDEKGKQRNRRIFGL	QRPKGQGNKVQNGSVH	LLQDDISSSYTTTTTI
ELDDRADALQAGASQF	RPKGQGNKVQNGSVHQ	QDDISSSYTTTTTITA
DDRADALQAGASQFET	KGQGNKVQNGSVHQKD	ISSSYTTTTTITAPPS
GHGRDLSAAGIGLLAA	GQGNKVQNGSVHQKDG	SSYTTTTTITAPPSRV
ENDNGTVRCEMPELVQ	HQKDGLNDDDFEPYLS	SYTTTTTITAPPSRVL
EDGEPQQKRAHTEEPQ	QTTDTKSKRK______	YTTTTTITAPPSRVLQ
TTEDTEAKKRKRAERF	HQKDTVHDNDFEPYLT	PPSRVLQNGGDKLETM
EDTEAKKRKRAERFGI	SSEITTKDLKEKKEVV	QNGGDKLETMPLYLED
EEAAGASPAKANGQEN	EITTKDLKEKKEVVEE	GDKLETMPLYLEDDIR
EAAGASPAKANGQENG	TTKDLKEKKEVVEEAE	PDVHIMQHHVLPIQAR
GASPAKANGQENGHVK	EKKEVVEEAENGRDAP	PRSGATAGAAGGRGKG
ASPAKANGQENGHVKS	KEVVEEAENGRDAPAN	SGATAGAAGGRGKGAY
AKANGQENGHVKSNGD	EVVEEAENGRDAPANG	AGAAGGRGKGAYQDRD
KANGQENGHVKSNGDL	VVEEAENGRDAPANGN	GAAGGRGKGAYQDRDK
QLLSGFPRRAFSEADM	EEAENGRDAPANGNAE	AAGGRGKGAYQDRDKP
KIYGGRQRNGVMPSHF	NGRDAPANGNAENEEN	AGGRGKGAYQDRDKPA
SISVQVNSIKFDSE__	GRDAPANGNAENEENG	DRDKPAQIRFSNISAA
ASSQTDLSQTISKKTV	RDAPANGNAENEENGE	SNSHNALKLRFPAEDE
DLSQTISKKTVRSIQE	SILRLAKADGIVSKNF	NSHNALKLRFPAEDEF
KSNIDKKFSAHYDAVE	ILRLAKADGIVSKNF_	LKLRFPAEDEFPDLSA
PVISESTPIAETIMAS	AKADGIVSKNF_____	EFPDLSAHNNHMAKVL
AKVKDEPQRRSARLSA	KADGIVSKNF______	PGHLQEGFGCVVTNRF
GAEAKPAE________	EHSPAKTSAVSNTKPG	GHLQEGFGCVVTNRFD
PEKPVKKQKTGETSRA	HSPAKTSAVSNTKPGQ	SPSKAVAARAAGSTVR
EDDEKLKKRKERFGIV	SPAKTSAVSNTKPGQP	AAGSTVRQRKNASCGT
GKDGSKVTKQEPTRRS	PAKTSAVSNTKPGQPP	LGKYGPADVEDTTGSG
DSDEDDDY________	AKTSAVSNTKPGQPPQ	VKDVNQQEFVRALAAF
AAKEEPKRRSARLSAK	KTQIVSNT________	PDLRIAQLRFLLSLPE
DDAYLNSPWADNTALK	EAATGEDASSPPPKTE	SQGFKQRR________
WADNTALKRHFHGVKD	AATGEDASSPPPKTEA	FGGARPREEVVQKEQE
GSGGFHLAQQASASGS	ERQLNENKQERDKENR	PDEKTKKRIFQIHTSR
AVDKKAAGAGKVTKSA	KQERDKENRHRKRSHS	PPAPETYEEYGYDDTY
EEEIEVDSRVADNSFD	SEDLVIRLRRPPLRYP	LAGDLPVDMEFGEDLL
TPNSTPPRRVQTPLLR	AMVAATQGAAAAAGSG	EAEQGGAE________
FTGFGKKARTFDLEAM	DLGLLEEDDEFEEFPA	GQRDLDRIAGQVAAAN
EDTVTNGS________	LFVSNHAY________	KIEEIKDFLLTARRKD
TDEFEELEFLSTINVG	PAEKAPVKKKAAKKAG	EEIKDFLLTARRKDAK
DDSLIGGNASAEGPEG	APVKKKAAKKAGGTPR	IKDFLLTARRKDAKSV
KKINEELESQYQQSMD	PVKKKAAKKAGGTPRK	AGPDKNLVTGDHIPTP
PIPYEFMA________	VKKKAAKKAGGTPRKA	DKNLVTGDHIPTPQDL
EEEKNFKAFASLRMAR	PAEKTPVKKKARKSAG	LTTTPRRRPRAMDFF_
SDNDDDTHVRMDFARR	AEKTPVKKKARKSAGA	TNGSEISDSDYQAEYP
ITVVKGIRLSENVIDR	KTPVKKKARKSAGAAK	PEPEPVKEEKLSPEPI
RESHPHGVKRSASPDD	QQYQDATAEEGEFEEE	LGISTPEELGLDKV__
HPHGVKRSASPDDDLG	LLHNNGHNGYPNGTSA	FEPYLSPQARPNNAYT
TPPAKKLNFDQA____	IEADFRLNDSHKHKDK	QARPNNAYTAMSDSYL
PPAKKLNFDQA_____	LEDGPKFLKSGDAAIV	STSSHNLQSIFNIGSR
KKLNFDQA________	AVRRPLVASVGLNVPA	AIFGGARPREEVVQKE
SPGGVYATRSSAVRLR	EGGKKKPLKQPKKQAK	VGEKTEERRVERDILK
VAIKAMAK________	RTANPPKKR_______	KTEERRVERDILKEMF
AIPTAVNLADSRTPAA	ESTFRQNPRIVNHWAS	EQDVEKKK________
EQRPKGQGNKVQNGSV	FANFANFSK_______	SPPQTKDQ________
QRPKGQGNKVQNGSVH	ANFANFSK________	NETSQHHDDLE_____
RPKGQGNKVQNGSVHQ	HVAVENALGLDQQFAG	DTDKFKGFCYVEFDEV
GQGNKVQNGSVHQKDG	ALGLDQQFAGLDLNSS	APDDVDFF________
GNKVQNGSVHQKDGLN	QFAGLDLNSSDNQSGG	NMDEKGKQRNRRIFGL
HQKDGLNDDDFEPYLS	KEGFEKISKGANPVEI	ELDDRADALQAGASQF
VFQTTDTKSKRK____	SEDDEKLKKRKERFGI	DDRADALQAGASQFET
QTTDTKSKRK______	SGEGLLGLSPGPNGHS	GHGRDLSAAGIGLLAA
HQKDTVHDNDFEPYLT	AFIQTQQLHAAMADTF	EHSSDPYHSGYEMPYA
ISLEGKPL________	FIQTQQLHAAMADTFL	EGTIDVTDFLSMTQQD
TSSEITTKDLKEKKEV	YNARMDTS________	ENDNGTVRCEMPELVQ
SSEITTKDLKEKKEVV	SQGHGRDLSAAGIGLL	EDGEPQQKRAHTEEPQ
EITTKDLKEKKEVVEE	AGIGLLAAATQSLSMP	LEAAKRLNAKEIVLKA
EKKEVVEEAENGRDAP	LLAAATQSLSMPASLG	TTEDTEAKKRKRAERF
KEVVEEAENGRDAPAN	LAAATQSLSMPASLGR	EDTEAKKRKRAERFGI
VVEEAENGRDAPANGN	AAATQSLSMPASLGRM	EEAAGASPAKANGQEN
EEAENGRDAPANGNAE	VRTPTQTNGSNVPFKP	EAAGASPAKANGQENG
NGRDAPANGNAENEEN	PLSDPAPF________	GASPAKANGQENGHVK
GRDAPANGNAENEENG	EEEEEHPSKTSTKKLK	ASPAKANGQENGHVKS
RDAPANGNAENEENGE	LAGRYYALKSMTEAEQ	AKANGQENGHVKSNGD
ILRLAKADGIVSKNF_	KVDKVIQAQTAFSANP	KANGQENGHVKSNGDL
AKADGIVSKNF_____	EQPVRKNKMASNIFGT	KIYGGRQRNGVMPSHF
KADGIVSKNF______	LEAGDKKPDAK_____	SISVQVNSIKFDSE__
EHSPAKTSAVSNTKPG	NKLTLDKLDVKGKRVV	ASSQTDLSQTISKKTV
HSPAKTSAVSNTKPGQ	KTEGWSKNFKLLQSQL	DLSQTISKKTVRSIQE
SPAKTSAVSNTKPGQP	SKNFKLLQSQLQVKKA	ASSQQGLAYATEAVYE
PAKTSAVSNTKPGQPP	LQSQLQVKKAALTQAK	KSNIDKKFSAHYDAVE
AKTSAVSNTKPGQPPQ	LRKESQKDRKNPLPPS	AKVKDEPQRRSARLSA
KTQIVSNT________	QIVAPKGS________	AKSVKIKKNKDNVKFK
EAATGEDASSPPPKTE	PINGNGKQ________	GAEAKPAE________
ERQLNENKQERDKENR	PFYPGKTTYGGAAAAV	PEKPVKKQKTGETSRA
KQERDKENRHRKRSHS	VYATRSSAVRLRSSVP	EDDEKLKKRKERFGIV
GDDSFNTFFSETGAGK	ATRSSAVRLRSSVPGV	GKDGSKVTKQEPTRRS
EKGVGGNNGGNGNGGG	IDITDFQAKREKVDSQ	DSDEDDDY________
SEDLVIRLRRPPLRYP	RAEEAKLKAKYPSLGQ	DDAYLNSPWADNTALK
AMVAATQGAAAAAGSG	WESPKQIKKKKKARRE	WADNTALKRHFHGVKD
DLGLLEEDDEFEEFPA	QQTLSHLSQQHHHLPQ	APVPLMSLRTAPAANL
LFVSNHAY________	PAPNFKATAVMPDGQF	EEEIEVDSRVADNSFD
PAEKAPVKKKAAKKAG	ENKLLGKNGTGGLFQG	TPNSTPPRRVQTPLLR
VKKKAAKKAGGTPRKA	SGRKTRSARRRTTQII	EDTVTNGS________
PAEKTPVKKKARKSAG	DSLPLVDTHSKRTLLI	TDEFEELEFLSTINVG
AEKTPVKKKARKSAGA	AKAQSGLAFQQTSNTQ	DDSLIGGNASAEGPEG
KTPVKKKARKSAGAAK	KAQSGLAFQQTSNTQP	KKINEELESQYQQSMD
QQYQDATAEEGEFEEE	QESFAEHRSGLVPQQI	PIPYEFMA________
LLHNNGHNGYPNGTSA	SFAEHRSGLVPQQIKV	EEEKNFKAFASLRMAR
IEADFRLNDSHKHKDK	EDIKAKMQASIEKGGS	SDNDDDTHVRMDFARR
AVRRPLVASVGLNVPA	RLLQDSVDFSLADAIN	ITVVKGIRLSENVIDR
EGGKKKPLKQPKKQAK	IMGLSSQNGQLRGPVK	FSADETWDSAIDTWSP
RTANPPKKR_______	MGLSSQNGQLRGPVKP	RESHPHGVKRSASPDD
ESTFRQNPRIVNHWAS	GSKLIRKAKEAPFVPV	HPHGVKRSASPDDDLG
FANFANFSK_______	KSDSPSTSSIPPLNET	TPPAKKLNFDQA____
ANFANFSK________	TKKLEDVKNSPTFKSF	PPAKKLNFDQA_____
KVPDFSEYRRLEVLDS	QAPTKASE________	SPGGVYATRSSAVRLR
HVAVENALGLDQQFAG	PGVRLLQDSVDFSLAD	VAIKAMAK________
VENALGLDQQFAGLDL	KVETVKSDNKDDDIDI	AIPTAVNLADSRTPAA
ALGLDQQFAGLDLNSS	YVPRAILVDLEPGTMD	LEQRPKGQGNKVQNGS
QFAGLDLNSSDNQSGG	DDWNGTRPSLKAPPAR	EQRPKGQGNKVQNGSV
KEGFEKISKGANPVEI	DWNGTRPSLKAPPARP	QRPKGQGNKVQNGSVH
SGEGLLGLSPGPNGHS	SKGGPLQALTRESTRG	RPKGQGNKVQNGSVHQ
GTAFIQTQQLHAAMAD	GGPLQALTRESTRGSR	KGQGNKVQNGSVHQKD
AFIQTQQLHAAMADTF	ALTRESTRGSRRTPRK	GQGNKVQNGSVHQKDG
FIQTQQLHAAMADTFL	QLEHLQSKYIGTGHAD	GNKVQNGSVHQKDGLN
QTQQLHAAMADTFLEH	AKDVTLLKETERASPI	HQKDGLNDDDFEPYLS
SRDSQGHGRDLSAAGI	TNEKVELQELNDRFAN	VFQTTDTKSKRK____
SQGHGRDLSAAGIGLL	TTISSQKI________	QTTDTKSKRK______
AGIGLLAAATQSLSMP	NPLHLDYVMAAANLFA	HQKDTVHDNDFEPYLT
LLAAATQSLSMPASLG	ATTVTSNMSSNQDPPP	ISLEGKPL________
LAAATQSLSMPASLGR	SGIESSSPEVKGYWGL	EITTKDLKEKKEVVEE
AAATQSLSMPASLGRM	LSEAEAQALLSGDTQT	TTKDLKEKKEVVEEAE
VRTPTQTNGSNVPFKP	VEGSLIVEKIMQSSSE	EKKEVVEEAENGRDAP
PLSDPAPF________	TKAKSKKN________	KEVVEEAENGRDAPAN
NEGEDYAE________	KEVVIVSATRTPIGSF	EVVEEAENGRDAPANG
EEEEEHPSKTSTKKLK	NVADSPRNKKEKSS__	VVEEAENGRDAPANGN
LAGRYYALKSMTEAEQ	DKEKAEKLKQSLPPGL	EEAENGRDAPANGNAE
KVDKVIQAQTAFSANP	EEKNIKWG________	NGRDAPANGNAENEEN
EQPVRKNKMASNIFGT	GSHGYNTGVSVTSSNT	GRDAPANGNAENEENG
LEAGDKKPDAK_____	TETSYVTGSTMPPTTV	RDAPANGNAENEENGE
STSSHNLQSIFNIGSR	GQRDLDRIAGQVAAAN	SILRLAKADGIVSKNF
NKLTLDKLDVKGKRVV	KQNAEELQDFMRDLEN	ILRLAKADGIVSKNF_
KTEGWSKNFKLLQSQL	VAESEFTH________	AKADGIVSKNF_____
SKNFKLLQSQLQVKKA	GGMGGGMF________	KADGIVSKNF______
LQSQLQVKKAALTQAK	KKDSSQLGTDATKEKP	EHSPAKTSAVSNTKPG
VKKAALTQAKSQRTKQ	GISETRIEKRIVITGD	SPAKTSAVSNTKPGQP
LRKESQKDRKNPLPPS	KGVDPNSRNSSRVLRP	AKTSAVSNTKPGQPPQ
AAQVVQWVSFADSDIV	GVDPNSRNSSRVLRPP	KTQIVSNT________
QIVAPKGS________	DPNSRNSSRVLRPPGG	EAATGEDASSPPPKTE
PINGNGKQ________	PNSRNSSRVLRPPGGG	AATGEDASSPPPKTEA
VYATRSSAVRLRSSVP	EKNYTKAMRLFVGEPV	GDDSFNTFFSETGAGK
ATRSSAVRLRSSVPGV	KNYTKAMRLFVGEPVW	GKDPLSANHSLKPLPS
IDITDFQAKREKVDSQ	DDIDIDAI________	SEDLVIRLRRPPLRYP
RAEEAKLKAKYPSLGQ	ITPPVVLRLKCGSGPV	AMVAATQGAAAAAGSG
WESPKQIKKKKKARRE	GEGFYKYK________	DLGLLEEDDEFEEFPA
GHPAPNFKATAVMPDG	KEYFSKHN________	LFVSNHAY________
PAPNFKATAVMPDGQF	EVQKHSVHTLVFRSLK	PAEKAPVKKKAAKKAG
ENKLLGKNGTGGLFQG	RDGQVINETSQHHDDL	APVKKKAAKKAGGTPR
SGRKTRSARRRTTQII	KRPRGVSLTNHHFYDE	PVKKKAAKKAGGTPRK
DSLPLVDTHSKRTLLI	RPRGVSLTNHHFYDES	VKKKAAKKAGGTPRKA
AKAQSGLAFQQTSNTQ	GNLPFNTVQGDIDAIF	PAEKTPVKKKARKSAG
KAQSGLAFQQTSNTQP	VDKKAAGAGKVTKSAQ	AEKTPVKKKARKSAGA
QESFAEHRSGLVPQQI	ADKPVSSQLRVLTLSE	KTPVKKKARKSAGAAK
SFAEHRSGLVPQQIKV	DEVRTGTYRQLFHPEQ	QQYQDATAEEGEFEEE
EDIKAKMQASIEKGGS	EAEVTRTARKQSAQKR	LLHNNGHNGYPNGTSA
RLLQDSVDFSLADAIN	MIARVADGLPLAASMQ	IEADFRLNDSHKHKDK
IMGLSSQNGQLRGPVK	NSIKFDSE________	GSGGFHLAQQASASGS
MGLSSQNGQLRGPVKP	TEDSIRDYEDGMEVDT	AVRRPLVASVGLNVPA
GSKLIRKAKEAPFVPV	LEDEVRNLRKINRDLF	EGGKKKPLKQPKKQAK
NTPAARLHRFKNKGKD	IVSATRTPIGSFLGSL	ESTFRQNPRIVNHWAS
PKKEDALLYQSKGYND	GNEERKQKFLRLMGAG	FANFANFSK_______
KSDSPSTSSIPPLNET	LIDTHLLQARANLTQA	ANFANFSK________
TKKLEDVKNSPTFKSF	ASSEELARQRGVLERT	FEFPEFQL________
QAPTKASE________	TESEKRDENWDKEIEK	SNIVEVVQSSPVERPS
PGVRLLQDSVDFSLAD	AQAHSQEQ________	KVPDFSEYRRLEVLDS
KVETVKSDNKDDDIDI	PPPPPSRK________	HVAVENALGLDQQFAG
YVPRAILVDLEPGTMD	NA	VENALGLDQQFAGLDL
DWNGTRPSLKAPPARP	NA	ALGLDQQFAGLDLNSS
SSKGGPLQALTRESTR	NA	QFAGLDLNSSDNQSGG
SKGGPLQALTRESTRG	NA	KEGFEKISKGANPVEI
GGPLQALTRESTRGSR	NA	SIASVLLQTREMGEAK
ALTRESTRGSRRTPRK	NA	SGEGLLGLSPGPNGHS
ATESGAQSAPLPMEGV	NA	AFIQTQQLHAAMADTF
NKVSEQLQAKMPMKKE	NA	FIQTQQLHAAMADTFL
HSQLEHLQSKYIGTGH	NA	SRDSQGHGRDLSAAGI
QLEHLQSKYIGTGHAD	NA	SQGHGRDLSAAGIGLL
AKDVTLLKETERASPI	NA	AGIGLLAAATQSLSMP
TNEKVELQELNDRFAN	NA	LLAAATQSLSMPASLG
NPLHLDYVMAAANLFA	NA	LAAATQSLSMPASLGR
ATTVTSNMSSNQDPPP	NA	AAATQSLSMPASLGRM
SGIESSSPEVKGYWGL	NA	VRTPTQTNGSNVPFKP
LSEAEAQALLSGDTQT	NA	PLSDPAPF________
VEGSLIVEKIMQSSSE	NA	NEGEDYAE________
TKAKSKKN________	NA	EEEEEHPSKTSTKKLK
KEVVIVSATRTPIGSF	NA	LAGRYYALKSMTEAEQ
KETIEQEKRSEIS___	NA	KVDKVIQAQTAFSANP
NVADSPRNKKEKSS__	NA	EQPVRKNKMASNIFGT
DKEKAEKLKQSLPPGL	NA	LEAGDKKPDAK_____
EEKNIKWG________	NA	NKLTLDKLDVKGKRVV
GSHGYNTGVSVTSSNT	NA	KNFKLLQSQLQVKKAA
TETSYVTGSTMPPTTV	NA	LQSQLQVKKAALTQAK
KQNAEELQDFMRDLEN	NA	VKKAALTQAKSQRTKQ
VAESEFTH________	NA	LRKESQKDRKNPLPPS
GGMGGGMF________	NA	QIVAPKGS________
KKDSSQLGTDATKEKP	NA	PINGNGKQ________
GISETRIEKRIVITGD	NA	PFYPGKTTYGGAAAAV
KGVDPNSRNSSRVLRP	NA	VYATRSSAVRLRSSVP
GVDPNSRNSSRVLRPP	NA	ATRSSAVRLRSSVPGV
DPNSRNSSRVLRPPGG	NA	RAEEAKLKAKYPSLGQ
PNSRNSSRVLRPPGGG	NA	WESPKQIKKKKKARRE
EKNYTKAMRLFVGEPV	NA	QQTLSHLSQQHHHLPQ
KNYTKAMRLFVGEPVW	NA	NDHFVKLISWYDNEFG
DDIDIDAI________	NA	GHPAPNFKATAVMPDG
ITPPVVLRLKCGSGPV	NA	PAPNFKATAVMPDGQF
GEGFYKYK________	NA	SGRKTRSARRRTTQII
KEYFSKHN________	NA	DSLPLVDTHSKRTLLI
EVQKHSVHTLVFRSLK	NA	AKAQSGLAFQQTSNTQ
RDGQVINETSQHHDDL	NA	KAQSGLAFQQTSNTQP
KRPRGVSLTNHHFYDE	NA	SGLAFQQTSNTQPIPI
RPRGVSLTNHHFYDES	NA	ISPGLSYASHTVGFTP
GNLPFNTVQGDIDAIF	NA	QESFAEHRSGLVPQQI
VDKKAAGAGKVTKSAQ	NA	SFAEHRSGLVPQQIKV
ADKPVSSQLRVLTLSE	NA	EDIKAKMQASIEKGGS
MIARVADGLPLAASMQ	NA	RLLQDSVDFSLADAIN
NSIKFDSE________	NA	IMGLSSQNGQLRGPVK
LEDEVRNLRKINRDLF	NA	MGLSSQNGQLRGPVKP
IVSATRTPIGSFLGSL	NA	NTPAARLHRFKNKGKD
SVDGLTLSPDPEERPG	NA	KSDSPSTSSIPPLNET
VRHQLLKT________	NA	TKKLEDVKNSPTFKSF
GNEERKQKFLRLMGAG	NA	QAPTKASE________
LIDTHLLQARANLTQA	NA	KVETVKSDNKDDDIDI
ASSEELARQRGVLERT	NA	TAGAVPVRNEKGEISM
TESEKRDENWDKEIEK	NA	YVPRAILVDLEPGTMD
AAAAVRQSKLRNTPYQ	NA	DDWNGTRPSLKAPPAR
AQAHSQEQ________	NA	DWNGTRPSLKAPPARP
PPPPPSRK________	NA	SSKGGPLQALTRESTR
NA	NA	SKGGPLQALTRESTRG
NA	NA	GGPLQALTRESTRGSR
NA	NA	ALTRESTRGSRRTPRK
NA	NA	EIRTLAVERLLEPLVT
NA	NA	HSQLEHLQSKYIGTGH
NA	NA	QLEHLQSKYIGTGHAD
NA	NA	AKDVTLLKETERASPI
NA	NA	TNEKVELQELNDRFAN
NA	NA	TTISSQKI________
NA	NA	NPLHLDYVMAAANLFA
NA	NA	ATTVTSNMSSNQDPPP
NA	NA	SGIESSSPEVKGYWGL
NA	NA	LSEAEAQALLSGDTQT
NA	NA	VEGSLIVEKIMQSSSE
NA	NA	TKAKSKKN________
NA	NA	KEVVIVSATRTPIGSF
NA	NA	DDLVQALGLSKGPGLE
NA	NA	DKEKAEKLKQSLPPGL
NA	NA	EEKNIKWG________
NA	NA	GSHGYNTGVSVTSSNT
NA	NA	TETSYVTGSTMPPTTV
NA	NA	AEVVQGQSRTPRISPP
NA	NA	VAESEFTH________
NA	NA	KKDSSQLGTDATKEKP
NA	NA	GISETRIEKRIVITGD
NA	NA	GVDPNSRNSSRVLRPP
NA	NA	DPNSRNSSRVLRPPGG
NA	NA	PNSRNSSRVLRPPGGG
NA	NA	EKNYTKAMRLFVGEPV
NA	NA	KNYTKAMRLFVGEPVW
NA	NA	DDIDIDAI________
NA	NA	ITPPVVLRLKCGSGPV
NA	NA	GEGFYKYK________
NA	NA	KEYFSKHN________
NA	NA	ADAVAVTMGPKGRTVI
NA	NA	EVQKHSVHTLVFRSLK
NA	NA	HSVHTLVFRSLKRTHD
NA	NA	RDGQVINETSQHHDDL
NA	NA	KRPRGVSLTNHHFYDE
NA	NA	RPRGVSLTNHHFYDES
NA	NA	VDKKAAGAGKVTKSAQ
NA	NA	ADKPVSSQLRVLTLSE
NA	NA	MIARVADGLPLAASMQ
NA	NA	NSIKFDSE________
NA	NA	LEDEVRNLRKINRDLF
NA	NA	IVSATRTPIGSFLGSL
NA	NA	GNEERKQKFLRLMGAG
NA	NA	LPDEDDDL________
NA	NA	LIDTHLLQARANLTQA
NA	NA	ASSEELARQRGVLERT
NA	NA	TESEKRDENWDKEIEK
NA	NA	AQAHSQEQ________
NA	NA	IEGYVPSQADVAVFEA
NA	NA	SYFTTRTYGEPESAGP
NA	NA	PPPPPSRK________

## Sheet: ctrl_30min
Rep_1	Rep_2	Rep_3
SSSSYRRMFGGPGTAS	SSSSYRRMFGGPGTAS	SSSSYRRMFGGPGTAS
GPGTASRPSSSRSYVT	GPGTASRPSSSRSYVT	GPGTASRPSSSRSYVT

## Sheet: ctrl_24hrs
Rep_1	Rep_2	Rep_3
KLAQENGWGVMVSHRS	DTHSKRTLLIKTVETR	KLAQENGWGVMVSHRS
RKFLPLFDRVLVERSA	SHRNANAEPAVQRTLL	DTHSKRTLLIKTVETR
WGVMVSHRSGETEDTF	RKFLPLFDRVLVERSA	RKFLPLFDRVLVERSA
NA	QVINETSQHHDDLE__	WGVMVSHRSGETEDTF
NA	VQRTLLEK________	QVINETSQHHDDLE__
NA	PAEKAPVKKKAAKKAG	NA

## Sheet: spec_MPro_5min
ID	specificity_1	specificity_2	specificity_3	specificity_CTRL_1	specificity_CTRL_2	specificity_CTRL_3	median_specificity	median_CTRL_specificity	FC	pval	p_val_adj	FC significant	FC significant positive
N_P1	-7.49154	-7.57568	-7.54182	-8.72348	-8.99602	-8.71175	-7.53635	-8.81041	1.27407	0.000186497	0.00149561	1.27407	1.27407
R_P1'	-7.03081	-7.0282	-7.00125	-8.24286	-8.15274	-8.08371	-7.02008	-8.15977	1.13969	1.72073e-05	0.000390013	1.13969	1.13969
Q_P1	-7.46325	-7.45412	-7.45693	-8.56478	-8.49852	-8.52732	-7.4581	-8.53021	1.07211	6.38326e-07	0.000204264	1.07211	1.07211
L_P2	-6.42183	-6.43962	-6.42971	-7.39486	-7.3153	-7.44326	-6.43039	-7.38447	0.954084	1.44099e-05	0.000390013	0.954084	0.954084
G_P7'	-7.40828	-7.39698	-7.41629	-8.10535	-7.99602	-8.17118	-7.40718	-8.09085	0.683666	0.000184519	0.00149561	0.683666	0.683666
T_P4	-7.84597	-7.79808	-7.79614	-8.53504	-8.38304	-8.52732	-7.81339	-8.4818	0.668406	0.000211942	0.00164104	0.668406	0.668406
Y_P1	-8.65789	-8.55992	-8.64761	-9.29177	-9.2255	-9.3132	-8.62181	-9.27682	0.655011	8.78818e-05	0.00088939	0.655011	0.655011
A_P5	-7.08366	-7.12928	-7.10509	-7.62619	-7.74363	-7.77886	-7.10601	-7.71622	0.610215	0.000220515	0.00164104	0.610215	0.610215
S_P1'	-7.08366	-7.05006	-7.08371	-7.72348	-7.72593	-7.57126	-7.07248	-7.67356	0.601082	0.00032881	0.00214733	0.601082	0.601082
V_P2	-7.61059	-7.54432	-7.60132	-8.17247	-8.17659	-8.10509	-7.58541	-8.15138	0.565971	5.35343e-05	0.000680811	0.565971	0.565971
A_P1'	-7.03081	-7.06111	-7.02143	-7.47732	-7.57568	-7.66338	-7.03778	-7.57213	0.534347	0.000630985	0.00342229	0.534347	0.534347
G_P8	-7.4355	-7.52889	-7.47074	-8.02046	-7.99602	-8.02143	-7.47838	-8.01264	0.53426	4.74772e-05	0.000666586	0.53426	0.53426
R_P3	-7.69032	-7.64054	-7.64761	-8.06228	-8.12928	-8.3132	-7.65949	-8.16825	0.508766	0.00266743	0.00959075	0.508766	0.508766
G_P4'	-7.50589	-7.49852	-7.45693	-8.02046	-8.03909	-7.88577	-7.48711	-7.98177	0.494662	0.000615729	0.00339713	0.494662	0.494662
R_P6	-7.88296	-7.83555	-7.94236	-8.34239	-8.41105	-8.28853	-7.88696	-8.34733	0.46037	0.000610282	0.00339713	0.46037	0.46037
K_P1	-7.53504	-7.51362	-7.54182	-8	-7.87403	-8.04189	-7.53016	-7.97197	0.441813	0.000988354	0.00433251	0.441813	0.441813
K_P1'	-7.53504	-7.60775	-7.52732	-8.02046	-7.99602	-7.92325	-7.5567	-7.97991	0.423209	0.000402877	0.00238742	0.423209	0.423209
K_P3	-7.46325	-7.59163	-7.49875	-7.90182	-7.91355	-7.98135	-7.51787	-7.93224	0.414367	0.000813147	0.00406574	0.414367	0.414367
A_P8	-7.25493	-7.21311	-7.30081	-7.69032	-7.65721	-7.63202	-7.25629	-7.65985	0.403564	0.000186952	0.00149561	0.403564	0.403564
Q_P8	-8.06228	-8.12928	-8.08371	-8.50589	-8.52889	-8.36382	-8.09176	-8.4662	0.374441	0.00247726	0.00900823	0.374441	0.374441
S_P7'	-7.7068	-7.65721	-7.63202	-8.08366	-7.93373	-8.00125	-7.66535	-8.00621	0.340869	0.00217596	0.00819184	0.340869	0.340869
K_P7	-7.7922	-7.72593	-7.77886	-8.10535	-8.12928	-8.06265	-7.76566	-8.0991	0.333436	0.00028858	0.0020002	0.333436	0.333436
A_P3	-7.46325	-7.49852	-7.47074	-7.72348	-7.79808	-7.83133	-7.4775	-7.7843	0.306795	0.000802138	0.00406574	0.306795	0.306795
P_P1	-7.75743	-7.76155	-7.77886	-8.10535	-8.06111	-8.02143	-7.76595	-8.06263	0.296685	0.00029378	0.0020002	0.296685	0.296685
D_P6	-7.95992	-7.9542	-7.94236	-8.24286	-8.2255	-8.14881	-7.95216	-8.20572	0.253562	0.000987632	0.00433251	0.253562	0.253562
A_P2'	-7.4355	-7.43962	-7.45693	-7.69032	-7.67409	-7.67932	-7.44402	-7.68124	0.237224	8.17965e-06	0.000390013	0.237224	0.237224
K_P4	-7.62619	-7.57568	-7.55647	-7.86434	-7.79808	-7.79614	-7.58611	-7.81952	0.233408	0.00158153	0.00640619	0.233408	0.233408
C_P8	-12.1497	-12.4985	-12.1712	-10.5648	-10.4985	-10.1712	-12.2731	-10.4115	-1.86165	0.000359601	0.00223956	-1.86165	0
D_P8	-8.24286	-8.27612	-8.26429	-8.24286	-8.25059	-8.41629	-8.26109	-8.30325	0.042156	0.503405	0.57124	0	0
E_P8	-7.12738	-7.06111	-7.09436	-7.69032	-7.64054	-7.37676	-7.09428	-7.5692	0.47492	0.00871261	0.0232336	0	0
F_P8	-9.50589	-9.49852	-9.52732	-8.36839	-8.38304	-8.84925	-9.51058	-8.53356	-0.977018	0.00348659	0.011622	0	0
H_P8	-9.82782	-9.76155	-9.77886	-9.39486	-9.38304	-9.58621	-9.78941	-9.4547	-0.334705	0.0082368	0.0223371	0	0
I_P8	-9.10535	-8.99602	-9.04189	-8.17247	-8.12928	-8.26429	-9.04775	-8.18868	-0.859076	7.21616e-05	0.000796266	-0.859076	0
K_P8	-7.52039	-7.51362	-7.54182	-7.65789	-7.64054	-8.04189	-7.52528	-7.78011	0.25483	0.124185	0.174294	0	0
L_P8	-8.42183	-8.35556	-8.3132	-7.7068	-7.7797	-7.71175	-8.36353	-7.73275	-0.630778	8.90056e-05	0.00088939	-0.630778	0
M_P8	-9.97982	-9.91355	-10.0013	-8.94029	-8.99602	-8.96172	-9.96488	-8.96601	-0.998865	5.52045e-06	0.000390013	-0.998865	0
N_P8	-9.29177	-9.43962	-9.3132	-8.50589	-8.46877	-9.21698	-9.3482	-8.73055	-0.617648	0.0672912	0.10723	0	0
P_P8	-8.14975	-8.1062	-8.06265	-7.97982	-8.01739	-8.26429	-8.1062	-8.08717	-0.0190335	0.847339	0.874082	0	0
R_P8	-8.24286	-8.32859	-8.26429	-8.62619	-8.65721	-8.26429	-8.27858	-8.5159	0.237317	0.139022	0.188215	0	0
S_P8	-7.47732	-7.38304	-7.48468	-8.06228	-8.06111	-7.74491	-7.44835	-7.9561	0.507757	0.0100838	0.0256097	0	0
T_P8	-8.17247	-8.25059	-8.17118	-8.10535	-8.12928	-8.14881	-8.19808	-8.12782	-0.0702628	0.073263	0.113257	0	0
V_P8	-8.29177	-8.41105	-8.28853	-8.14975	-8.17659	-7.84925	-8.33045	-8.05853	-0.271923	0.0728287	0.113132	0	0
W_P8	-11.5648	-11.4985	-11.8492	-11.1497	-11.0835	-10.0013	-11.6375	-10.7448	-0.892691	0.0826068	0.12469	0	0
Y_P8	-9.90182	-9.91355	-9.92325	-9.02046	-8.99602	-9.12678	-9.91287	-9.04775	-0.86512	2.87228e-05	0.000527906	-0.86512	0
A_P7	-7.39486	-7.32859	-7.37676	-7.52039	-7.60775	-7.77886	-7.36674	-7.63567	0.268928	0.0265753	0.0518542	0	0
C_P7	-11.8278	-12.0835	-11.8492	-10.0623	-9.99602	-9.92325	-11.9202	-9.99385	-1.92633	2.96947e-05	0.000527906	-1.92633	0
D_P7	-7.86434	-7.9542	-7.98135	-8.14975	-8.12928	-8.74491	-7.9333	-8.34131	0.408016	0.117353	0.166163	0	0
E_P7	-7.23088	-7.2633	-7.18249	-7.4355	-7.48357	-7.37676	-7.22556	-7.43194	0.206384	0.00600601	0.0173146	0	0
F_P7	-9.90182	-9.91355	-9.92325	-9.14975	-9.03909	-8.64761	-9.91287	-8.94548	-0.967392	0.00315889	0.0108693	0	0
G_P7	-7.74036	-7.62405	-7.66338	-8.29177	-8.27612	-7.88577	-7.67593	-8.15122	0.475293	0.0256725	0.051345	0	0
H_P7	-9.56478	-9.62405	-9.58621	-9.97982	-9.91355	-9.17118	-9.59168	-9.68818	0.0965022	0.729131	0.77774	0	0
I_P7	-8.86434	-8.91355	-8.77886	-8.62619	-8.62405	-8.52732	-8.85225	-8.59252	-0.259735	0.00706789	0.0194976	0	0
L_P7	-7.92093	-7.89365	-7.83133	-7.18396	-7.12928	-7.26429	-7.88197	-7.19251	-0.689459	0.000129178	0.00118106	-0.689459	0
M_P7	-10.3424	-10.1766	-10.2643	-9.69032	-9.55992	-9.26429	-10.2611	-9.50484	-0.756249	0.00496239	0.0151235	0	0
N_P7	-8.82782	-8.76155	-8.77886	-8.44931	-8.43962	-8.71175	-8.78941	-8.53356	-0.255851	0.0487259	0.0833992	0	0
P_P7	-8.59516	-8.76155	-8.67932	-8.06228	-8.1062	-8.36382	-8.67868	-8.17744	-0.501243	0.00899563	0.0237901	0	0
Q_P7	-8.14975	-8.2255	-8.24044	-8.44931	-8.43962	-8.26429	-8.20523	-8.38441	0.179177	0.0540809	0.0910836	0	0
R_P7	-8.19555	-8.15274	-8.1939	-8.17247	-8.08348	-8.21698	-8.18073	-8.15764	-0.0230876	0.609037	0.672041	0	0
S_P7	-7.67401	-7.62405	-7.67932	-7.77471	-7.85466	-7.44326	-7.65913	-7.69087	0.0317465	0.815159	0.852454	0	0
T_P7	-7.86434	-8.06111	-8.04189	-8.21901	-8.27612	-8.67932	-7.98912	-8.39149	0.402369	0.0633363	0.102881	0	0
V_P7	-7.84597	-7.81669	-7.84925	-8	-7.93373	-8.36382	-7.8373	-8.09918	0.261882	0.122539	0.172742	0	0
W_P7	-11.8278	-12.0835	-11.5862	-10.6903	-10.7616	-10.7117	-11.8325	-10.7212	-1.1113	0.00156239	0.00640619	-1.1113	0
Y_P7	-9.75743	-9.62405	-9.64761	-9.62619	-9.69116	-9.21698	-9.67636	-9.51144	-0.164922	0.34454	0.41064	0	0
A_P6	-7.47732	-7.41105	-7.47074	-8.24286	-7.99602	-7.8674	-7.45304	-8.03542	0.582385	0.00655016	0.0183864	0	0
C_P6	-12.1497	-11.7616	-11.8492	-9.29177	-9.55992	-10.5862	-11.9202	-9.81263	-2.10755	0.00688434	0.0191564	0	0
E_P6	-7.64195	-7.76155	-7.61659	-7.50589	-7.48357	-7.48468	-7.67336	-7.49138	-0.181986	0.0158804	0.0355891	0	0
F_P6	-9.14975	-9.12928	-9.12678	-9.19555	-9.32859	-8.88577	-9.13527	-9.13664	0.00136813	0.99219	0.9953	0	0
G_P6	-7.84597	-7.85466	-7.83133	-7.82782	-7.76155	-7.81362	-7.84398	-7.801	-0.0429863	0.113299	0.161784	0	0
H_P6	-9.82782	-9.83555	-9.84925	-9.39486	-9.32859	-9.84925	-9.83754	-9.52423	-0.313306	0.128253	0.177667	0	0
I_P6	-8.90182	-8.91355	-8.92325	-9.02046	-8.91355	-8.52732	-8.91287	-8.82045	-0.0924281	0.570875	0.638742	0	0
K_P6	-7.72348	-7.72593	-7.77886	-7.62619	-7.67409	-7.69544	-7.74276	-7.66524	-0.0775174	0.0469264	0.082057	0	0
L_P6	-7.82782	-7.83555	-7.79614	-7.47732	-7.49852	-7.45693	-7.81984	-7.47759	-0.342246	3.60608e-05	0.00060734	-0.342246	0
M_P6	-9.82782	-9.91355	-9.84925	-9.24286	-9.2255	-9.26429	-9.86354	-9.24421	-0.619327	2.50715e-05	0.00050143	-0.619327	0
N_P6	-9.06228	-8.99602	-8.88577	-8.56478	-8.59163	-8.88577	-8.98136	-8.68073	-0.30063	0.0591357	0.0965481	0	0
P_P6	-8.44931	-8.55992	-8.58621	-8.42183	-8.25059	-8.02143	-8.53181	-8.23128	-0.300531	0.0714674	0.111559	0	0
Q_P6	-7.94029	-7.91355	-7.84925	-8.08366	-8.12928	-8.44326	-7.90103	-8.21873	0.3177	0.0522433	0.0884542	0	0
S_P6	-7.44931	-7.41105	-7.47074	-7.72348	-7.72593	-7.96172	-7.4437	-7.80371	0.360012	0.011253	0.0274883	0	0
T_P6	-8.21901	-8.25059	-8.14881	-8.34239	-8.46877	-8.33829	-8.20614	-8.38315	0.177013	0.0277237	0.0537672	0	0
V_P6	-7.92093	-7.89365	-8.02143	-7.7922	-7.91355	-7.60132	-7.94534	-7.76902	-0.176314	0.148993	0.197834	0	0
W_P6	-11.8278	-11.7616	-11.8492	-10.3424	-10.383	-10.8492	-11.8129	-10.5249	-1.28798	0.00144434	0.00600247	-1.28798	0
Y_P6	-9.34239	-9.43962	-9.36382	-9.34239	-9.27612	-9.77886	-9.38195	-9.46579	0.0838463	0.628845	0.689146	0	0
C_P5	-12.1497	-12.0835	-11.8492	-9.82782	-9.55992	-9.84925	-12.0275	-9.74566	-2.28183	6.23893e-05	0.000713021	-2.28183	0
D_P5	-8.31686	-8.27612	-8.24044	-8.06228	-8.01739	-8.04189	-8.27781	-8.04052	-0.237284	0.000754382	0.00389358	-0.237284	0
E_P5	-7.8099	-7.81669	-7.8674	-7.69032	-7.70844	-7.49875	-7.83133	-7.6325	-0.198826	0.0458714	0.0815492	0	0
F_P5	-8.94029	-8.91355	-8.84925	-9.10535	-8.9542	-8.96172	-8.90103	-9.00709	0.106059	0.131731	0.180145	0	0
G_P5	-7.90182	-7.83555	-7.8674	-7.94029	-8.12928	-8.00125	-7.86826	-8.02361	0.155354	0.0576872	0.0956471	0	0
H_P5	-9.82782	-9.99602	-9.77886	-9.19555	-9.32859	-9.12678	-9.86756	-9.21698	-0.65059	0.0018241	0.00703268	-0.65059	0
I_P5	-8.59516	-8.59163	-8.55647	-8.59516	-8.83555	-8.58621	-8.58108	-8.67231	0.0912243	0.331334	0.397105	0	0
K_P5	-7.62619	-7.64054	-7.67932	-7.8099	-7.79808	-8.08371	-7.64868	-7.89723	0.248548	0.058424	0.0959515	0	0
L_P5	-8.04122	-8.03909	-7.96172	-7.59516	-7.59163	-7.3132	-8.01401	-7.49999	-0.514017	0.00608982	0.0173995	0	0
M_P5	-10.1497	-10.1766	-10.2643	-9.62619	-9.69116	-9.77886	-10.1969	-9.69874	-0.498139	0.000891782	0.00419662	-0.498139	0
N_P5	-8.86434	-8.91355	-8.92325	-9.02046	-8.87403	-8.84925	-8.90038	-8.91458	0.0141968	0.813824	0.852454	0	0
P_P5	-8.17247	-8.2255	-8.14881	-7.92093	-8.01739	-8.24044	-8.18226	-8.05959	-0.122672	0.275904	0.340885	0	0
Q_P5	-8.34239	-8.32859	-8.38982	-8.08366	-8.01739	-8.36382	-8.3536	-8.15496	-0.198644	0.139098	0.188215	0	0
R_P5	-8.17247	-8.25059	-8.17118	-8.24286	-8.20084	-8.10509	-8.19808	-8.18293	-0.015151	0.77031	0.816223	0	0
S_P5	-7.61059	-7.59163	-7.64761	-7.74036	-7.72593	-7.76179	-7.61661	-7.74269	0.12608	0.00292666	0.0102916	0	0
T_P5	-7.90182	-7.87403	-7.90439	-8.50589	-8.38304	-8.02143	-7.89341	-8.30345	0.410041	0.0481329	0.0832569	0	0
V_P5	-7.67401	-7.57568	-7.63202	-7.92093	-7.7797	-8.14881	-7.62724	-7.94981	0.322573	0.0441228	0.0797701	0	0
W_P5	-12.1497	-12.0835	-11.8492	-10.8278	-10.9136	-10.4707	-12.0275	-10.7374	-1.29012	0.00139125	0.00585789	-1.29012	0
Y_P5	-9.90182	-9.99602	-10.1712	-9.34239	-9.27612	-9.58621	-10.023	-9.40158	-0.621427	0.0072094	0.019718	0	0
A_P4	-7.50589	-7.51362	-7.57126	-7.82782	-7.79808	-7.64761	-7.53026	-7.75784	0.227577	0.0186663	0.0411945	0	0
C_P4	-13.1497	-13.0835	-13.1712	-9.90182	-9.62405	-10.0837	-13.1348	-9.86986	-3.26494	1.79794e-05	0.000390013	-3.26494	0
D_P4	-8.29177	-8.27612	-8.28853	-7.88296	-7.97495	-8.26429	-8.28547	-8.04073	-0.244741	0.100385	0.145354	0	0
E_P4	-7.53504	-7.51362	-7.55647	-7.35533	-7.38304	-7.60132	-7.53504	-7.44656	-0.0884786	0.324175	0.389985	0	0
F_P4	-9.62619	-9.55992	-9.64761	-8.97982	-9.2255	-9.21698	-9.61124	-9.14077	-0.470472	0.00514732	0.0153938	0	0
G_P4	-7.53504	-7.57568	-7.58621	-7.88296	-7.76155	-8.1939	-7.56565	-7.94614	0.380491	0.0426448	0.0775359	0	0
H_P4	-9.62619	-9.55992	-9.58621	-10.2429	-9.83555	-9.47074	-9.59077	-9.84972	0.258943	0.311716	0.376412	0	0
I_P4	-9.39486	-9.43962	-9.36382	-8.42183	-8.38304	-8.33829	-9.39943	-8.38105	-1.01838	6.30305e-06	0.000390013	-1.01838	0
L_P4	-7.88296	-7.91355	-7.90439	-7.75743	-7.60775	-7.36382	-7.9003	-7.57633	-0.323969	0.0480433	0.0832569	0	0
M_P4	-9.69032	-9.91355	-9.64761	-9.29177	-9.38304	-9.36382	-9.75049	-9.34621	-0.404286	0.00968749	0.0254098	0	0
N_P4	-8.59516	-8.46877	-8.55647	-8.53504	-8.62405	-8.67932	-8.54013	-8.6128	0.0726713	0.26599	0.331194	0	0
P_P4	-8	-8.06111	-8.10509	-8.17247	-8.25059	-7.96172	-8.0554	-8.12826	0.0728603	0.470412	0.537613	0	0
Q_P4	-7.95992	-7.97495	-7.88577	-8.47732	-8.55992	-8.26429	-7.94022	-8.43384	0.493624	0.00588881	0.0171311	0	0
R_P4	-8.08366	-7.99602	-8.02143	-8.24286	-8.27612	-8.17118	-8.0337	-8.23005	0.196351	0.0083174	0.0223661	0	0
S_P4	-7.53504	-7.54432	-7.58621	-7.57989	-7.54432	-7.69544	-7.55519	-7.60655	0.0513611	0.347158	0.41064	0	0
V_P4	-8.2671	-8.35556	-8.28853	-7.86434	-8.08348	-8.06265	-8.30373	-8.00349	-0.30024	0.0159039	0.0355891	0	0
W_P4	-11.3424	-11.7616	-11.0013	-10.8278	-10.9136	-10.8492	-11.3684	-10.8635	-0.504858	0.0847284	0.126107	0	0
Y_P4	-10.3424	-10.383	-10.2643	-9.69032	-9.91355	-9.36382	-10.3299	-9.6559	-0.674009	0.0145492	0.0339836	0	0
C_P3	-12.5648	-13.0835	-12.1712	-10.5648	-11.0835	-9.77886	-12.6065	-10.4757	-2.13077	0.00995383	0.0256097	0	0
D_P3	-8.75743	-8.87403	-8.81362	-8.2671	-8.25059	-8.12678	-8.81503	-8.21483	-0.600201	0.000418345	0.002434	-0.600201	0
E_P3	-7.90182	-7.85466	-7.88577	-7.74036	-7.64054	-7.83133	-7.88075	-7.73741	-0.143345	0.065128	0.105257	0	0
F_P3	-9.56478	-9.76155	-9.58621	-8.94029	-8.91355	-8.74491	-9.63752	-8.86625	-0.771263	0.000906945	0.00420612	-0.771263	0
G_P3	-7.7068	-7.65721	-7.63202	-8.2671	-8.32859	-7.94236	-7.66535	-8.17935	0.514006	0.0134827	0.0319795	0	0
H_P3	-9.29177	-9.32859	-9.36382	-9.69032	-9.99602	-9.26429	-9.32806	-9.65021	0.322146	0.205313	0.264919	0	0
I_P3	-8.82782	-8.62405	-8.71175	-8.29177	-8.20084	-8.47074	-8.7212	-8.32111	-0.400091	0.0155006	0.03543	0	0
L_P3	-7.88296	-7.85466	-7.88577	-7.36839	-7.52889	-7.41629	-7.87447	-7.43786	-0.43661	0.000849582	0.00418256	-0.43661	0
M_P3	-10.2429	-10.2761	-10.0013	-10.1497	-9.99602	-9.04189	-10.1734	-9.72922	-0.444192	0.281546	0.346518	0	0
N_P3	-8.69032	-8.72593	-8.71175	-8.59516	-8.72593	-8.38982	-8.70933	-8.5703	-0.139028	0.230425	0.293769	0	0
P_P3	-8.12738	-8.2255	-8.08371	-8.44931	-8.20084	-7.8674	-8.14553	-8.17251	0.0269827	0.884086	0.903857	0	0
Q_P3	-8	-7.97495	-8.10509	-8.24286	-8.06111	-8.52732	-8.02668	-8.2771	0.250415	0.151275	0.19921	0	0
S_P3	-7.84597	-7.74363	-7.8674	-7.54983	-7.60775	-7.92325	-7.819	-7.69361	-0.125387	0.362684	0.426687	0	0
T_P3	-8.04122	-7.99602	-8.10509	-7.95992	-8.08348	-8.41629	-8.04744	-8.15323	0.105788	0.49165	0.559887	0	0
V_P3	-7.67401	-7.64054	-7.63202	-7.84597	-7.69116	-7.8674	-7.64886	-7.80151	0.152652	0.0552807	0.0926168	0	0
W_P3	-11.8278	-12.0835	-11.8492	-10.6903	-10.383	-11.0013	-11.9202	-10.6915	-1.22865	0.00332684	0.0113254	0	0
Y_P3	-9.44931	-9.55992	-9.64761	-9.29177	-9.2255	-9.36382	-9.55228	-9.2937	-0.258584	0.020855	0.0439052	0	0
A_P2	-7.53504	-7.60775	-7.61659	-7.74036	-7.67409	-7.94236	-7.58646	-7.7856	0.199144	0.0784515	0.119545	0	0
C_P2	-11.1497	-11.2761	-11.1712	-9.97982	-10.1766	-10.2643	-11.199	-10.1402	-1.05878	0.000335642	0.00214811	-1.05878	0
D_P2	-8.7922	-8.52889	-8.61659	-8.24286	-8.25059	-7.96172	-8.64589	-8.15172	-0.494168	0.0157088	0.0355891	0	0
E_P2	-8.82782	-8.87403	-8.77886	-7.54983	-7.65721	-7.54182	-8.8269	-7.58296	-1.24395	1.13584e-05	0.000390013	-1.24395	0
F_P2	-10.1497	-10.2761	-10.0837	-8.39486	-8.38304	-9.17118	-10.1699	-8.64969	-1.52017	0.00468862	0.0145666	0	0
G_P2	-8.7922	-8.72593	-8.74491	-8.19555	-8.41105	-8.00125	-8.75434	-8.20262	-0.551726	0.0100427	0.0256097	0	0
H_P2	-10.0623	-10.1766	-9.92325	-10.4493	-10.4985	-9.41629	-10.054	-10.1214	0.0673304	0.860875	0.882948	0	0
I_P2	-8.47732	-8.46877	-8.47074	-8.47732	-8.55992	-8.3132	-8.47228	-8.45014	-0.0221311	0.775554	0.819067	0	0
K_P2	-7.97982	-7.99602	-8.02143	-7.90182	-7.9542	-7.79614	-7.99909	-7.88405	-0.115038	0.0747735	0.115036	0	0
M_P2	-9.69032	-9.69116	-9.84925	-9.69032	-9.55992	-9.3132	-9.74358	-9.52114	-0.222432	0.143711	0.192417	0	0
N_P2	-8.50589	-8.52889	-8.52732	-9.14975	-8.72593	-9.08371	-8.5207	-8.98646	0.465762	0.0241838	0.0496079	0	0
P_P2	-8.62619	-8.52889	-8.64761	-8.19555	-8.38304	-8.3132	-8.6009	-8.29726	-0.303635	0.00991267	0.0256097	0	0
Q_P2	-8.02046	-7.97495	-7.94236	-8.17247	-8.35556	-8.21698	-7.97926	-8.24834	0.269076	0.0107024	0.0265487	0	0
R_P2	-8.12738	-8.08348	-8.12678	-8.08366	-8.03909	-8.44326	-8.11255	-8.18867	0.0761194	0.586213	0.653617	0	0
S_P2	-7.77471	-7.83555	-7.79614	-7.64195	-7.52889	-7.37676	-7.80213	-7.51587	-0.286264	0.022168	0.0460634	0	0
T_P2	-7.65789	-7.74363	-7.66338	-7.97982	-7.79808	-8.21698	-7.6883	-7.99829	0.309991	0.0673541	0.10723	0	0
W_P2	-12.5648	-12.4985	-12.5862	-10.8278	-10.624	-10.4707	-12.5498	-10.6409	-1.90897	5.74434e-05	0.000680811	-1.90897	0
Y_P2	-10.0623	-10.0835	-10.1712	-9.24286	-9.49852	-9.64761	-10.1056	-9.463	-0.642651	0.00636852	0.0180347	0	0
A_P1	-7.20723	-7.21311	-7.21698	-7.84597	-7.83555	-8.24044	-7.21244	-7.97399	0.761543	0.00464198	0.0145631	0	0
C_P1	-12.1497	-11.7616	-11.8492	-9.62619	-9.62405	-9.71175	-11.9202	-9.65399	-2.26619	4.79109e-05	0.000666586	-2.26619	0
D_P1	-8.42183	-8.38304	-8.38982	-8.34239	-8.27612	-8.14881	-8.39823	-8.25578	-0.142453	0.0701357	0.110017	0	0
E_P1	-8.02046	-8.01739	-8.02143	-7.46325	-7.42527	-7.37676	-8.01976	-7.42176	-0.598003	1.82818e-05	0.000390013	-0.598003	0
F_P1	-8.82782	-8.79808	-8.92325	-8.72348	-8.69116	-9.17118	-8.84972	-8.86194	0.0122252	0.942561	0.954493	0	0
G_P1	-7.90182	-7.85466	-7.81362	-8.06228	-7.89365	-7.92325	-7.8567	-7.95973	0.103028	0.14975	0.198016	0	0
H_P1	-9.19555	-9.2255	-9.21698	-9.06228	-9.32859	-9.47074	-9.21268	-9.2872	0.0745279	0.568331	0.638126	0	0
I_P1	-10.2429	-10.1766	-10.3638	-8.53504	-8.52889	-8.47074	-10.2611	-8.51155	-1.74953	7.453e-06	0.000390013	-1.74953	0
L_P1	-8.44931	-8.49852	-8.61659	-7.40828	-7.39698	-7.28853	-8.52147	-7.3646	-1.15687	5.05008e-05	0.000673344	-1.15687	0
M_P1	-9.75743	-9.83555	-9.84925	-9.50589	-9.62405	-9.77886	-9.81408	-9.63627	-0.177811	0.101855	0.146817	0	0
R_P1	-7.8099	-7.85466	-7.81362	-8.36839	-8.30212	-8.10509	-7.82606	-8.25853	0.432471	0.00576242	0.0169172	0	0
S_P1	-7.82782	-7.76155	-7.69544	-7.57989	-7.64054	-7.60132	-7.7616	-7.60725	-0.154355	0.0215204	0.04501	0	0
T_P1	-8.82782	-8.91355	-8.77886	-8.19555	-8.62405	-8.06265	-8.84008	-8.29408	-0.545994	0.0348563	0.0644741	0	0
V_P1	-10.3424	-10.4985	-10.2643	-8.12738	-7.97495	-8.17118	-10.3684	-8.09117	-2.27723	1.51255e-05	0.000390013	-2.27723	0
W_P1	-12.1497	-12.0835	-12.1712	-10.2429	-10.624	-10.8492	-12.1348	-10.5721	-1.56275	0.000946836	0.00432839	-1.56275	0
C_P1'	-12.1497	-12.0835	-12.1712	-9.97982	-9.99602	-10.1712	-12.1348	-10.049	-2.0858	6.23512e-06	0.000390013	-2.0858	0
D_P1'	-9.39486	-9.2255	-9.36382	-8.12738	-8.15274	-8.28853	-9.32806	-8.18955	-1.13851	9.44977e-05	0.00088939	-1.13851	0
E_P1'	-9.02046	-9.03909	-9.17118	-7.75743	-7.69116	-7.72823	-9.07691	-7.72561	-1.3513	1.22181e-05	0.000390013	-1.3513	0
F_P1'	-8.86434	-8.83555	-8.84925	-9.02046	-8.87403	-9.00125	-8.84972	-8.96525	0.115532	0.0686297	0.10872	0	0
G_P1'	-7.95992	-7.9542	-8.00125	-7.67401	-7.7797	-7.63202	-7.97179	-7.69524	-0.276547	0.00396824	0.0130193	0	0
H_P1'	-9.69032	-9.76155	-9.77886	-9.56478	-9.32859	-9.58621	-9.74358	-9.4932	-0.250378	0.0449101	0.0807373	0	0
I_P1'	-10.1497	-10.1766	-9.92325	-8.69032	-8.65721	-8.38982	-10.0832	-8.57912	-1.50408	0.000269433	0.00191597	-1.50408	0
L_P1'	-8.17247	-7.99602	-8.10509	-7.57989	-7.59163	-7.51297	-8.09119	-7.56149	-0.529696	0.000743392	0.00389358	-0.529696	0
M_P1'	-9.97982	-9.76155	-9.84925	-9.75743	-9.62405	-9.77886	-9.86354	-9.72011	-0.143428	0.146656	0.195541	0	0
N_P1'	-8.44931	-8.35556	-8.47074	-8.65789	-8.65721	-8.41629	-8.4252	-8.57713	0.151932	0.158804	0.208267	0	0
P_P1'	-10.1497	-10.4985	-10.0837	-8.06228	-8.12928	-7.81362	-10.244	-8.00173	-2.24226	0.000152489	0.00131882	-2.24226	0
Q_P1'	-8.50589	-8.65721	-8.52732	-8.50589	-8.35556	-8.49875	-8.56348	-8.4534	-0.110075	0.18113	0.235616	0	0
T_P1'	-8.21901	-8.30212	-8.26429	-8.39486	-8.06111	-8.55647	-8.26181	-8.33748	0.0756742	0.635647	0.694222	0	0
V_P1'	-9.14975	-9.27612	-9.17118	-7.90182	-8.20084	-8.14881	-9.19902	-8.08382	-1.11519	0.000370234	0.00223956	-1.11519	0
W_P1'	-12.5648	-12.4985	-12.5862	-10.1497	-10.7616	-11.0013	-12.5498	-10.6375	-1.91232	0.0016885	0.00664173	-1.91232	0
Y_P1'	-9.29177	-9.08348	-9.26429	-9.06228	-9.12928	-9.92325	-9.21318	-9.37161	0.158428	0.606832	0.671925	0	0
C_P2'	-11.8278	-11.7616	-11.8492	-10.5648	-10.0835	-9.77886	-11.8129	-10.1424	-1.6705	0.00191783	0.007306	-1.6705	0
D_P2'	-8.69032	-8.72593	-8.67932	-8.34239	-8.32859	-8.58621	-8.69852	-8.41907	-0.279456	0.0301078	0.0570089	0	0
E_P2'	-7.94029	-7.9542	-7.94236	-7.7068	-7.74363	-7.79614	-7.94562	-7.74886	-0.196759	0.00170194	0.00664173	-0.196759	0
F_P2'	-9.90182	-9.76155	-9.84925	-8.69032	-8.76155	-9.12678	-9.83754	-8.85955	-0.97799	0.00228351	0.00849679	-0.97799	0
G_P2'	-7.82782	-7.85466	-7.88577	-7.72348	-7.89365	-8.00125	-7.85608	-7.8728	0.0167116	0.849498	0.874082	0	0
H_P2'	-9.19555	-9.43962	-9.26429	-9.97982	-9.62405	-9.84925	-9.29982	-9.81771	0.517886	0.015043	0.0346314	0	0
I_P2'	-8.39486	-8.52889	-8.44326	-8.24286	-8.20084	-8.17118	-8.45567	-8.20496	-0.250712	0.00482904	0.0148586	0	0
K_P2'	-7.57989	-7.55992	-7.57126	-7.7922	-7.89365	-7.67932	-7.57036	-7.78839	0.218034	0.0247388	0.0504211	0	0
L_P2'	-8.21901	-8.20084	-8.08371	-7.46325	-7.49852	-7.40299	-8.16785	-7.45492	-0.712935	0.000148944	0.00131882	-0.712935	0
M_P2'	-10.1497	-10.0835	-10.0837	-9.29177	-9.76155	-9.71175	-10.1056	-9.58835	-0.517293	0.0264241	0.0518542	0	0
N_P2'	-9.39486	-9.43962	-9.52732	-8.69032	-8.65721	-8.67932	-9.45393	-8.67562	-0.778317	4.15438e-05	0.000664701	-0.778317	0
P_P2'	-9.02046	-9.08348	-9.12678	-7.97982	-7.99602	-8.06265	-9.07691	-8.01283	-1.06408	1.17979e-05	0.000390013	-1.06408	0
Q_P2'	-8.08366	-8.03909	-8.06265	-8.42183	-8.52889	-8.12678	-8.0618	-8.35917	0.297368	0.0697497	0.10995	0	0
R_P2'	-8.10535	-8.01739	-8.10509	-8.10535	-8.41105	-8.49875	-8.07594	-8.33839	0.262443	0.0993601	0.144524	0	0
S_P2'	-7.36839	-7.28906	-7.30081	-7.75743	-7.55992	-7.84925	-7.31942	-7.7222	0.402778	0.0105582	0.0263955	0	0
T_P2'	-8.10535	-8.08348	-8.10509	-8.39486	-8.55992	-7.96172	-8.09797	-8.3055	0.207527	0.309662	0.376412	0	0
V_P2'	-8.06228	-8.08348	-8.08371	-8.12738	-7.93373	-7.88577	-8.07649	-7.9823	-0.0941972	0.273052	0.338669	0	0
W_P2'	-13.1497	-13.0835	-13.1712	-10.5648	-9.99602	-11.0013	-13.1348	-10.5207	-2.61412	0.000863649	0.00418739	-2.61412	0
Y_P2'	-9.56478	-9.49852	-9.36382	-9.75743	-9.12928	-9.3132	-9.47571	-9.39997	-0.0757383	0.718318	0.771348	0	0
A_P3'	-7.52039	-7.45412	-7.44326	-7.75743	-7.62405	-7.8674	-7.47259	-7.74962	0.277035	0.0203855	0.0433794	0	0
C_P3'	-11.1497	-10.9136	-11.1712	-10.6903	-10.383	-10.0837	-11.0782	-10.3857	-0.69247	0.0232305	0.0479597	0	0
D_P3'	-8.14975	-8.06111	-8.14881	-8.62619	-8.65721	-8.28853	-8.11989	-8.52398	0.404089	0.0293427	0.0558908	0	0
E_P3'	-8.21901	-8.12928	-8.08371	-7.44931	-7.45412	-7.81362	-8.144	-7.57235	-0.571651	0.0108193	0.0266321	0	0
F_P3'	-9.02046	-9.03909	-9.04189	-8.94029	-8.99602	-9.00125	-9.03381	-8.97919	-0.054627	0.0571193	0.0951988	0	0
G_P3'	-8.02046	-8.08348	-8.04189	-8	-7.70844	-7.92325	-8.04861	-7.87723	-0.171383	0.127058	0.177284	0	0
H_P3'	-9.34239	-9.27612	-9.3132	-9.02046	-9.32859	-10.0837	-9.31057	-9.47759	0.167019	0.625542	0.687882	0	0
I_P3'	-8.62619	-8.59163	-8.58621	-8.53504	-8.65721	-8.58621	-8.60134	-8.59282	-0.00851985	0.831724	0.861332	0	0
K_P3'	-8.02046	-8.01739	-8.02143	-7.86434	-7.89365	-8.1939	-8.01976	-7.98397	-0.0357958	0.751031	0.798439	0	0
L_P3'	-8.08366	-8.06111	-8.08371	-7.52039	-7.55992	-7.20539	-8.07616	-7.42857	-0.647594	0.0045056	0.0143915	0	0
M_P3'	-9.62619	-9.76155	-9.64761	-9.50589	-9.38304	-9.12678	-9.67845	-9.33857	-0.339879	0.0464617	0.082057	0	0
N_P3'	-8.39486	-8.38304	-8.3132	-8.59516	-8.83555	-8.92325	-8.3637	-8.78465	0.420955	0.0142095	0.0334341	0	0
P_P3'	-7.88296	-7.85466	-7.92325	-7.90182	-7.91355	-8.04189	-7.88696	-7.95242	0.0654657	0.253126	0.318898	0	0
Q_P3'	-8.31686	-8.35556	-8.36382	-8.47732	-8.72593	-8.28853	-8.34541	-8.49726	0.151848	0.299449	0.367141	0	0
R_P3'	-8.24286	-8.30212	-8.38982	-8.21901	-8.01739	-7.98135	-8.3116	-8.07258	-0.239014	0.048849	0.0833992	0	0
S_P3'	-7.75743	-7.7797	-7.74491	-7.69032	-7.83555	-7.63202	-7.76068	-7.7193	-0.041385	0.537019	0.60723	0	0
T_P3'	-8.42183	-8.43962	-8.3132	-8.21901	-8.03909	-8.33829	-8.39155	-8.19879	-0.192755	0.113755	0.161784	0	0
V_P3'	-8.47732	-8.52889	-8.44326	-7.84597	-7.93373	-8.38982	-8.48316	-8.05651	-0.426651	0.0664932	0.106924	0	0
W_P3'	-11.1497	-11.0835	-11.1712	-10.8278	-10.4985	-10.0013	-11.1348	-10.4425	-0.692272	0.0457317	0.0815492	0	0
Y_P3'	-9.14975	-9.32859	-9.47074	-9.56478	-9.69116	-8.38982	-9.31636	-9.21525	-0.101104	0.823494	0.855579	0	0
A_P4'	-7.75743	-7.83555	-7.8674	-7.72348	-7.81669	-7.44326	-7.82013	-7.66114	-0.158982	0.245357	0.310334	0	0
C_P4'	-12.5648	-12.4985	-12.1712	-10.0623	-11.0835	-9.47074	-12.4115	-10.2055	-2.20599	0.0105414	0.0263955	0	0
D_P4'	-7.95992	-7.87403	-7.88577	-8.10535	-8.15274	-8.41629	-7.90657	-8.22479	0.31822	0.0338606	0.0629965	0	0
E_P4'	-7.52039	-7.49852	-7.45693	-7.62619	-7.54432	-7.63202	-7.49195	-7.60084	0.108895	0.0324613	0.0607464	0	0
F_P4'	-9.39486	-9.32859	-9.3132	-8.7922	-8.62405	-9.26429	-9.34555	-8.89351	-0.452039	0.0794719	0.120526	0	0
H_P4'	-10.1497	-10.1766	-10.1712	-9.90182	-9.55992	-9.3132	-10.1658	-9.59164	-0.574193	0.0282872	0.0545295	0	0
I_P4'	-8.94029	-8.91355	-8.81362	-8.59516	-8.38304	-8.38982	-8.88916	-8.456	-0.433153	0.00552839	0.0163804	0	0
K_P4'	-7.94029	-7.97495	-8.00125	-7.97982	-7.9542	-7.90439	-7.97217	-7.94614	-0.0260306	0.41002	0.477114	0	0
L_P4'	-8.42183	-8.35556	-8.44326	-7.47732	-7.36923	-7.40299	-8.40688	-7.41652	-0.990365	1.81545e-05	0.000390013	-0.990365	0
M_P4'	-10.4493	-10.2761	-10.4707	-9.50589	-9.38304	-9.12678	-10.3987	-9.33857	-1.06015	0.00114424	0.00488209	-1.06015	0
N_P4'	-8.50589	-8.38304	-8.41629	-8.62619	-8.46877	-8.81362	-8.43507	-8.63619	0.20112	0.131214	0.180145	0	0
P_P4'	-8.42183	-8.35556	-8.47074	-8.08366	-8.03909	-8.3132	-8.41604	-8.14531	-0.270728	0.0412646	0.0754553	0	0
Q_P4'	-8.2671	-8.35556	-8.41629	-8.75743	-8.35556	-8.49875	-8.34632	-8.53725	0.190929	0.202294	0.262082	0	0
R_P4'	-8.21901	-8.17659	-8.1939	-8.04122	-8.25059	-8.06265	-8.1965	-8.11815	-0.0783437	0.311184	0.376412	0	0
S_P4'	-7.53504	-7.57568	-7.52732	-7.7068	-7.93373	-7.79614	-7.54601	-7.81222	0.26621	0.017058	0.0379067	0	0
T_P4'	-8.02046	-8.20084	-8.04189	-8.08366	-8.25059	-8.3132	-8.08773	-8.21581	0.128083	0.223718	0.286359	0	0
V_P4'	-8.36839	-8.30212	-8.33829	-7.94029	-7.9542	-8.02143	-8.33626	-7.97197	-0.364291	0.000320797	0.00213864	-0.364291	0
W_P4'	-11.8278	-11.7616	-11.8492	-9.97982	-10.2761	-11.1712	-11.8129	-10.4757	-1.33717	0.0204041	0.0433794	0	0
Y_P4'	-10.4493	-10.4985	-10.4707	-9.29177	-9.55992	-9.58621	-10.4729	-9.4793	-0.993555	0.000475167	0.00271524	-0.993555	0
A_P5'	-7.82782	-7.7797	-7.8674	-7.84597	-7.7797	-7.63202	-7.82497	-7.75256	-0.0724102	0.347761	0.41064	0	0
C_P5'	-12.1497	-12.0835	-12.1712	-10.4493	-10.1766	-10.4707	-12.1348	-10.3655	-1.76926	5.59959e-05	0.000680811	-1.76926	0
D_P5'	-8.04122	-7.97495	-8.00125	-7.95992	-8.03909	-8.24044	-8.00581	-8.07982	0.074006	0.43651	0.506098	0	0
E_P5'	-7.65789	-7.67409	-7.61659	-7.57989	-7.67409	-7.72823	-7.64952	-7.66074	0.0112143	0.82165	0.855579	0	0
F_P5'	-9.82782	-9.76155	-9.77886	-8.94029	-9.08348	-8.74491	-9.78941	-8.9229	-0.866515	0.000980049	0.00433251	-0.866515	0
G_P5'	-7.97982	-7.97495	-7.88577	-8	-8.03909	-8.12678	-7.94685	-8.05529	0.108439	0.0884401	0.131022	0	0
H_P5'	-9.56478	-9.43962	-9.71175	-9.39486	-9.69116	-9.47074	-9.57205	-9.51892	-0.0531314	0.67751	0.732443	0	0
I_P5'	-8.56478	-8.49852	-8.61659	-8.39486	-8.52889	-8.64761	-8.55996	-8.52379	-0.0361748	0.676837	0.732443	0	0
K_P5'	-8.02046	-7.97495	-7.90439	-7.90182	-7.79808	-7.67932	-7.9666	-7.79307	-0.17353	0.07517	0.115093	0	0
L_P5'	-8.02046	-8.08348	-8.02143	-7.30426	-7.48357	-7.32569	-8.04179	-7.37117	-0.670621	0.000370927	0.00223956	-0.670621	0
M_P5'	-10.2429	-10.2761	-10.0837	-9.90182	-9.69116	-9.47074	-10.2009	-9.68791	-0.512992	0.0204697	0.0433794	0	0
N_P5'	-8.82782	-8.83555	-8.88577	-8.53504	-8.62405	-8.84925	-8.84972	-8.66944	-0.180271	0.131357	0.180145	0	0
P_P5'	-8.12738	-8.17659	-8.10509	-8.44931	-8.12928	-7.83133	-8.13635	-8.13664	0.000287189	0.998801	0.998801	0	0
Q_P5'	-8.24286	-8.25059	-8.24044	-8.59516	-8.59163	-8.44326	-8.24463	-8.54335	0.298719	0.00398717	0.0130193	0	0
R_P5'	-8.39486	-8.41105	-8.47074	-8.24286	-8.03909	-8.00125	-8.42555	-8.0944	-0.331152	0.0134914	0.0319795	0	0
S_P5'	-7.62619	-7.59163	-7.61659	-7.77471	-7.55992	-8.00125	-7.61147	-7.77863	0.167159	0.261088	0.326361	0	0
T_P5'	-7.94029	-8.01739	-7.98135	-8.31686	-8.15274	-8.14881	-7.97968	-8.20614	0.226457	0.0191974	0.0420765	0	0
V_P5'	-8.21901	-8.17659	-8.21698	-7.77471	-7.99602	-8.02143	-8.20419	-7.93072	-0.273475	0.0263556	0.0518542	0	0
W_P5'	-12.5648	-12.4985	-12.5862	-12.1497	-10.9136	-10.5862	-12.5498	-11.2165	-1.33333	0.0489971	0.0833992	0	0
Y_P5'	-9.44931	-9.55992	-9.52732	-8.75743	-9.12928	-9.77886	-9.51218	-9.22186	-0.290324	0.388359	0.453558	0	0
A_P6'	-7.54983	-7.62405	-7.60132	-7.69032	-7.65721	-7.67932	-7.59173	-7.67562	0.0838835	0.025053	0.0504211	0	0
C_P6'	-12.5648	-12.4985	-12.5862	-10.3424	-9.99602	-9.64761	-12.5498	-9.99534	-2.5545	0.000226425	0.00164673	-2.5545	0
D_P6'	-8.04122	-8.06111	-7.98135	-8.42183	-8.20084	-8.58621	-8.0279	-8.40296	0.375064	0.0303722	0.0571713	0	0
E_P6'	-7.57989	-7.62405	-7.57126	-7.54983	-7.49852	-7.74491	-7.59173	-7.59775	0.00601999	0.941298	0.954493	0	0
F_P6'	-9.69032	-9.69116	-9.64761	-8.50589	-8.72593	-9.04189	-9.67636	-8.7579	-0.91846	0.00418206	0.0135178	0	0
G_P6'	-7.88296	-7.85466	-7.94236	-7.77471	-7.81669	-7.60132	-7.89333	-7.73091	-0.162419	0.0834866	0.125426	0	0
H_P6'	-9.56478	-9.55992	-9.58621	-9.90182	-9.49852	-9.47074	-9.57031	-9.62369	0.0533857	0.721468	0.77214	0	0
I_P6'	-8.75743	-8.76155	-8.81362	-8.7922	-8.79808	-8.47074	-8.77754	-8.687	-0.0905321	0.455394	0.524194	0	0
K_P6'	-8.08366	-7.97495	-8.06265	-7.90182	-8.01739	-8.00125	-8.04042	-7.97349	-0.0669345	0.244761	0.310334	0	0
L_P6'	-7.67401	-7.64054	-7.61659	-7.61059	-7.46877	-7.351	-7.64371	-7.47679	-0.166927	0.0956438	0.139753	0	0
M_P6'	-9.82782	-9.83555	-9.84925	-9.56478	-9.49852	-9.17118	-9.83754	-9.41149	-0.426047	0.0249641	0.0504211	0	0
N_P6'	-8.7922	-8.87403	-8.88577	-8.97982	-8.9542	-8.88577	-8.85067	-8.93993	0.0892658	0.0931897	0.136792	0	0
P_P6'	-8.42183	-8.49852	-8.49875	-7.86434	-8.30212	-8.28853	-8.47303	-8.15167	-0.321366	0.0924996	0.136405	0	0
Q_P6'	-8.36839	-8.38304	-8.41629	-8.24286	-8.46877	-8.33829	-8.38924	-8.34997	-0.0392678	0.589254	0.654727	0	0
R_P6'	-8.62619	-8.59163	-8.61659	-8	-8.2255	-8.06265	-8.61147	-8.09605	-0.515416	0.00162361	0.00649445	-0.515416	0
S_P6'	-7.88296	-7.70844	-7.77886	-7.82782	-7.83555	-7.72823	-7.79009	-7.7972	0.00711476	0.913265	0.930716	0	0
T_P6'	-8.12738	-8.2255	-8.10509	-8.02046	-8.25059	-8.17118	-8.15266	-8.14741	-0.00524501	0.948933	0.954901	0	0
V_P6'	-8.08366	-8.03909	-7.96172	-8.2671	-7.74363	-8.33829	-8.02816	-8.11634	0.0881845	0.668033	0.72711	0	0
W_P6'	-11.5648	-11.2761	-11.3638	-10.9798	-11.2761	-10.5862	-11.4016	-10.9474	-0.45419	0.104835	0.150436	0	0
Y_P6'	-10.0623	-10.0835	-10.1712	-9.02046	-8.79808	-8.96172	-10.1056	-8.92675	-1.17889	9.27926e-05	0.00088939	-1.17889	0
A_P7'	-7.90182	-7.9542	-7.8674	-7.62619	-7.81669	-7.92325	-7.9078	-7.78871	-0.119095	0.258443	0.324321	0	0
C_P7'	-13.1497	-13.0835	-13.1712	-9.97982	-10.9136	-9.92325	-13.1348	-10.2722	-2.86259	0.000886443	0.00419662	-2.86259	0
D_P7'	-8.10535	-8.08348	-8.14881	-8.29177	-8.2255	-8.36382	-8.11255	-8.2937	0.181148	0.0150049	0.0346314	0	0
E_P7'	-7.65789	-7.65721	-7.60132	-7.52039	-7.64054	-7.66338	-7.63881	-7.6081	-0.0307071	0.558308	0.629079	0	0
F_P7'	-9.56478	-9.32859	-9.52732	-8.42183	-8.38304	-9.21698	-9.47357	-8.67395	-0.799617	0.0468202	0.082057	0	0
H_P7'	-9.62619	-9.62405	-9.64761	-9.56478	-9.76155	-9.64761	-9.63262	-9.65798	0.0253677	0.682046	0.734865	0	0
I_P7'	-8.69032	-8.76155	-8.81362	-8.44931	-8.72593	-8.14881	-8.75516	-8.44135	-0.313816	0.139396	0.188215	0	0
K_P7'	-7.97982	-7.93373	-8.04189	-7.77471	-7.72593	-7.88577	-7.98515	-7.79547	-0.18968	0.028751	0.0550918	0	0
L_P7'	-8.17247	-8.1062	-8.10509	-7.52039	-7.52889	-7.32569	-8.12792	-7.45832	-0.669595	0.000667352	0.00355921	-0.669595	0
M_P7'	-10.6903	-10.7616	-10.7117	-9.14975	-9.69116	-8.92325	-10.7212	-9.25472	-1.46648	0.00304333	0.0105855	0	0
N_P7'	-8.7922	-8.69116	-8.71175	-8.82782	-8.79808	-8.71175	-8.7317	-8.77921	0.047513	0.364616	0.427389	0	0
P_P7'	-8.29177	-8.38304	-8.33829	-8.34239	-7.91355	-7.96172	-8.3377	-8.07256	-0.265141	0.127423	0.177284	0	0
Q_P7'	-8.42183	-8.49852	-8.41629	-8.29177	-8.1062	-8.14881	-8.44554	-8.18226	-0.263286	0.0132489	0.0318771	0	0
R_P7'	-8.10535	-8.12928	-8.06265	-8.24286	-8.12928	-8.55647	-8.0991	-8.30954	0.210439	0.178749	0.233468	0	0
T_P7'	-7.97982	-8.01739	-8.02143	-8.17247	-8.08348	-8.04189	-8.00621	-8.09928	0.0930661	0.0843094	0.12607	0	0
V_P7'	-8.2671	-8.27612	-8.24044	-8.08366	-8.2255	-7.81362	-8.26122	-8.04093	-0.220296	0.143463	0.192417	0	0
W_P7'	-13.1497	-13.0835	-13.1712	-10.1497	-10.4985	-10.7117	-13.1348	-10.4533	-2.68146	8.57401e-05	0.00088939	-2.68146	0
Y_P7'	-10.5648	-10.383	-10.5862	-9.10535	-8.9542	-9.26429	-10.5113	-9.10795	-1.4034	0.000219899	0.00164104	-1.4034	0
A_P8'	-7.64195	-7.54432	-7.54182	-7.84597	-7.72593	-7.55647	-7.57603	-7.70945	0.133422	0.213246	0.274051	0	0
C_P8'	-14.1497	-14.0835	-12.5862	-10.2429	-9.69116	-10.0013	-13.6065	-9.97842	-3.62806	0.00246621	0.00900823	-3.62806	0
D_P8'	-8.08366	-8.08348	-8.12678	-7.94029	-8.25059	-8.08371	-8.09797	-8.09153	-0.00644097	0.946859	0.954901	0	0
E_P8'	-7.32957	-7.27612	-7.351	-7.84597	-7.54432	-7.52732	-7.3189	-7.6392	0.320306	0.038949	0.0716303	0	0
F_P8'	-9.62619	-9.62405	-9.58621	-9.34239	-8.79808	-8.77886	-9.61215	-8.97311	-0.639039	0.0260329	0.0517425	0	0
G_P8'	-7.88296	-7.89365	-7.92325	-7.64195	-7.79808	-7.96172	-7.89995	-7.80058	-0.0993705	0.345956	0.41064	0	0
H_P8'	-10.2429	-10.0835	-10.1712	-9.82782	-9.62405	-9.92325	-10.1658	-9.79171	-0.374132	0.0198047	0.0431123	0	0
I_P8'	-8.62619	-8.49852	-8.61659	-8.65789	-8.20084	-8.52732	-8.58043	-8.46202	-0.118413	0.451199	0.52124	0	0
K_P8'	-8.08366	-8.06111	-8.08371	-7.72348	-7.74363	-7.8674	-8.07616	-7.77817	-0.297992	0.00283677	0.0100863	0	0
L_P8'	-7.90182	-7.97495	-7.92325	-7.47732	-7.54432	-7.25231	-7.93334	-7.42465	-0.508689	0.00501293	0.0151334	0	0
M_P8'	-10.1497	-10.4985	-10.1712	-9.29177	-9.08348	-9.47074	-10.2731	-9.28199	-0.991153	0.00336796	0.0113447	0	0
N_P8'	-9.24286	-9.2255	-9.21698	-8.65789	-8.72593	-8.74491	-9.22845	-8.70958	-0.518867	4.64154e-05	0.000666586	-0.518867	0
P_P8'	-8.50589	-8.49852	-8.49875	-7.95992	-8.17659	-8.28853	-8.50105	-8.14168	-0.359371	0.0203916	0.0433794	0	0
Q_P8'	-8.21901	-8.2255	-8.1939	-8.44931	-8.83555	-8.41629	-8.2128	-8.56705	0.354248	0.0584705	0.0959515	0	0
R_P8'	-8.39486	-8.38304	-8.38982	-8.14975	-8.2255	-8.08371	-8.38924	-8.15299	-0.236252	0.00454232	0.0143915	0	0
S_P8'	-7.77471	-7.85466	-7.81362	-7.77471	-7.99602	-7.74491	-7.81433	-7.83855	0.0242144	0.78373	0.824979	0	0
T_P8'	-8.08366	-8.1062	-8.02143	-8.08366	-8.12928	-8.64761	-8.07043	-8.28685	0.216423	0.301597	0.368362	0	0
V_P8'	-8.19555	-8.12928	-8.1939	-8.08366	-8.1062	-8.21698	-8.17291	-8.13561	-0.0372976	0.468525	0.537376	0	0
W_P8'	-11.8278	-12.0835	-11.8492	-10.4493	-10.7616	-10.8492	-11.9202	-10.6867	-1.23348	0.00108676	0.00469949	-1.23348	0
Y_P8'	-9.82782	-10.0835	-9.84925	-9.56478	-9.27612	-9.26429	-9.92018	-9.3684	-0.551784	0.0125045	0.030314	0	0

## Sheet: spec_MPro_30min
ID	specificity_1	specificity_2	specificity_3	specificity_CTRL_1	specificity_CTRL_2	specificity_CTRL_3	median_specificity	median_CTRL_specificity	FC	pval	p_val_adj	FC significant	FC significant positive
N_P1	-7.68954	-7.69258	-7.6212	-8.72125	-8.93205	-8.73163	-7.66778	-8.79498	1.1272	9.9653e-05	0.00125094	1.1272	1.1272
R_P1'	-7.11507	-7.14778	-7.13578	-8.43174	-8.24399	-8.08253	-7.13288	-8.25276	1.11988	0.00038149	0.002839	1.11988	1.11988
Q_P1	-7.40575	-7.41548	-7.43617	-8.43174	-8.51701	-8.35817	-7.41913	-8.43564	1.01651	2.65005e-05	0.000652319	1.01651	1.01651
L_P2	-6.44492	-6.41548	-6.42287	-7.51266	-7.36051	-7.44959	-6.42776	-7.44092	1.01317	2.30748e-05	0.000652319	1.01317	1.01317
P_P1	-7.40575	-7.30756	-7.42287	-8.2131	-8.05758	-7.98161	-7.37873	-8.0841	0.705369	0.000789204	0.00425987	0.705369	0.705369
K_P1	-7.36761	-7.30756	-7.33308	-8.08382	-7.87316	-8.02113	-7.33608	-7.9927	0.65662	0.000534976	0.00349372	0.65662	0.65662
A_P5	-7.14702	-7.10198	-7.1036	-7.73737	-7.76213	-7.81602	-7.11753	-7.77184	0.65431	1.8522e-05	0.000652319	0.65431	0.65431
T_P4	-7.82079	-7.81657	-7.79874	-8.40575	-8.51701	-8.43617	-7.81203	-8.45298	0.640944	4.59867e-05	0.000817542	0.640944	0.640944
R_P1	-7.58375	-7.54739	-7.6212	-8.23582	-8.29462	-8.1036	-7.58411	-8.21135	0.627234	0.00048463	0.00338968	0.627234	0.627234
S_P1'	-7.0332	-7.04669	-7.08253	-7.64325	-7.62624	-7.6061	-7.05414	-7.6252	0.571055	6.17806e-06	0.000494244	0.571055	0.571055
A_P6	-7.48518	-7.45812	-7.43617	-8.02328	-8.10198	-7.86913	-7.45982	-7.99813	0.538304	0.00152454	0.00696935	0.538304	0.538304
K_P3	-7.40575	-7.54739	-7.42287	-7.94632	-7.99345	-7.96224	-7.45867	-7.96734	0.508666	0.000404356	0.00294077	0.508666	0.508666
A_P1'	-7.23582	-7.13619	-7.17983	-7.59839	-7.64254	-7.79874	-7.18395	-7.67989	0.495944	0.00180388	0.00769656	0.495944	0.495944
V_P2	-7.62814	-7.61012	-7.6675	-8.10458	-8.14778	-8.04131	-7.63525	-8.09789	0.462637	0.000194688	0.00178141	0.462637	0.462637
A_P8	-7.20188	-7.2818	-7.22527	-7.68954	-7.65903	-7.6212	-7.23632	-7.65659	0.420276	0.000168695	0.00168695	0.420276	0.420276
K_P2'	-7.56925	-7.48727	-7.50456	-7.94632	-7.97269	-7.81602	-7.52036	-7.91168	0.391319	0.00198989	0.00816364	0.391319	0.391319
K_P7	-7.64325	-7.69258	-7.68326	-8.08382	-8.10198	-7.98161	-7.67303	-8.0558	0.382768	0.00069283	0.00388957	0.382768	0.382768
G_P8	-7.70531	-7.59418	-7.6519	-8.00365	-8.01451	-8.02113	-7.65046	-8.0131	0.362636	0.000366768	0.00279442	0.362636	0.362636
D_P6	-7.89118	-7.78005	-7.78167	-8.19074	-8.21933	-8.1036	-7.81763	-8.17122	0.353591	0.00221202	0.00896009	0.353591	0.353591
S_P2'	-7.39293	-7.44376	-7.42287	-7.78684	-7.72694	-7.76479	-7.41985	-7.75952	0.339669	0.000119942	0.00135713	0.339669	0.339669
K_P4	-7.58375	-7.57841	-7.59115	-7.90932	-7.79819	-7.88728	-7.58444	-7.86493	0.280496	0.00120016	0.00564779	0.280496	0.280496
C_P8	-12.6281	-12.102	-12.1911	-10.6281	-10.517	-10.1911	-12.3071	-10.4454	-1.86165	0.000876316	0.00445113	-1.86165	0
D_P8	-8.28237	-8.26909	-8.28417	-8.2131	-8.24399	-8.43617	-8.27854	-8.29776	0.0192165	0.797114	0.847431	0	0
E_P8	-7.17968	-7.19509	-7.28417	-7.62814	-7.65903	-7.37088	-7.21964	-7.55268	0.33304	0.0264281	0.0531885	0	0
F_P8	-9.75367	-9.57841	-9.49062	-8.40575	-8.37406	-8.86913	-9.60757	-8.54965	-1.05792	0.00399569	0.0136023	0	0
H_P8	-9.82079	-9.64254	-9.79874	-9.40575	-9.34709	-9.5472	-9.75402	-9.43335	-0.320677	0.0171749	0.0383366	0	0
I_P8	-9.04318	-9.05758	-8.98161	-8.14702	-8.14778	-8.26032	-9.02746	-8.18504	-0.842417	4.49262e-05	0.000817542	-0.842417	0
K_P8	-7.35512	-7.32062	-7.33308	-7.68954	-7.64254	-8.06178	-7.33627	-7.79795	0.461682	0.0255476	0.0517419	0	0
L_P8	-8.30621	-8.24399	-8.21378	-7.70531	-7.79819	-7.6675	-8.25466	-7.72367	-0.530995	0.000362008	0.00279442	-0.530995	0
M_P8	-9.89118	-9.78005	-9.86913	-9.00365	-8.93205	-8.98161	-9.84678	-8.97244	-0.874349	2.59899e-05	0.000652319	-0.874349	0
N_P8	-9.00365	-9.01451	-8.94313	-8.56925	-8.48727	-9.19106	-8.9871	-8.74919	-0.237907	0.346736	0.445604	0	0
P_P8	-8.19074	-8.26909	-8.23686	-7.94632	-8.03589	-8.28417	-8.23223	-8.08879	-0.143437	0.238341	0.333053	0	0
Q_P8	-8.16871	-8.24399	-8.14667	-8.54068	-8.51701	-8.35817	-8.18646	-8.47195	0.285497	0.0114137	0.0286291	0	0
R_P8	-8.35512	-8.37406	-8.33308	-8.62814	-8.64254	-8.26032	-8.35409	-8.51034	0.15625	0.281525	0.381729	0	0
S_P8	-7.45822	-7.45812	-7.43617	-8.08382	-8.05758	-7.74812	-7.45084	-7.96317	0.512337	0.0090244	0.0240651	0	0
T_P8	-8.12564	-8.19509	-8.23686	-8.10458	-8.10198	-8.14667	-8.18586	-8.11774	-0.0681229	0.127602	0.195372	0	0
V_P8	-8.23582	-8.24399	-8.23686	-8.14702	-8.17124	-7.86913	-8.23889	-8.06246	-0.176432	0.142911	0.209778	0	0
W_P8	-11.4057	-11.2946	-11.6061	-11.0432	-11.102	-10.0211	-11.4355	-10.7221	-0.713393	0.120474	0.187143	0	0
Y_P8	-9.62814	-9.78005	-9.79874	-9.00365	-8.97269	-9.14667	-9.73564	-9.041	-0.694641	0.000798725	0.00425987	-0.694641	0
A_P7	-7.61319	-7.56282	-7.53285	-7.56925	-7.53212	-7.76479	-7.56962	-7.62205	0.0524355	0.527566	0.627588	0	0
C_P7	-11.6281	-11.517	-11.6061	-9.96518	-10.0145	-9.94313	-11.5838	-9.97427	-1.60948	2.27754e-06	0.000319995	-1.60948	0
D_P7	-7.78684	-7.74442	-7.76479	-8.19074	-8.1247	-8.73163	-7.76535	-8.34902	0.583667	0.0387875	0.0730118	0	0
E_P7	-7.20188	-7.10198	-7.23686	-7.47164	-7.48727	-7.39664	-7.18024	-7.45185	0.27161	0.00523692	0.0167037	0	0
F_P7	-9.68954	-9.57841	-9.5472	-9.16871	-9.10198	-8.63647	-9.60505	-8.96905	-0.636001	0.0212276	0.0452856	0	0
G_P7	-7.67395	-7.69258	-7.6519	-8.33046	-8.24399	-7.86913	-7.67281	-8.14786	0.475052	0.0287347	0.0565332	0	0
H_P7	-9.68954	-9.64254	-9.6675	-9.96518	-10.0145	-9.23686	-9.66653	-9.73885	0.072323	0.788177	0.840722	0	0
I_P7	-8.82079	-8.93205	-8.90566	-8.59839	-8.64254	-8.49062	-8.88616	-8.57719	-0.308979	0.00534804	0.0167429	0	0
L_P7	-8.12564	-8.05758	-8.06178	-7.13629	-7.11329	-7.24854	-8.08167	-7.16604	-0.915625	4.17344e-05	0.000817542	-0.915625	0
M_P7	-10.1256	-10.1951	-10.0211	-9.35512	-9.64254	-9.28417	-10.114	-9.42728	-0.686675	0.00470944	0.0158634	0	0
N_P7	-8.96518	-9.14778	-9.02113	-8.38021	-8.45812	-8.73163	-9.0447	-8.52332	-0.521376	0.0120209	0.0291417	0	0
P_P7	-8.75367	-8.81657	-8.69921	-8.14702	-8.10198	-8.35817	-8.75648	-8.20239	-0.554097	0.00297849	0.0112131	0	0
Q_P7	-8.16871	-8.21933	-8.23686	-8.38021	-8.40154	-8.28417	-8.2083	-8.35531	0.147004	0.0239259	0.0497161	0	0
R_P7	-8.25891	-8.21933	-8.28417	-8.19074	-8.10198	-8.26032	-8.25414	-8.18434	-0.0697917	0.231794	0.328204	0	0
S_P7	-7.59839	-7.69258	-7.68326	-7.80371	-7.87316	-7.46314	-7.65808	-7.71334	0.0552551	0.693092	0.770103	0	0
T_P7	-7.78684	-7.89252	-7.85121	-8.23582	-8.32062	-8.73163	-7.84352	-8.42936	0.585832	0.0199223	0.0436037	0	0
V_P7	-7.85555	-7.76213	-7.74812	-7.96518	-7.93205	-8.33308	-7.7886	-8.07677	0.288171	0.0959223	0.155026	0	0
W_P7	-11.8912	-11.78	-11.8691	-10.8912	-10.78	-10.7316	-11.8468	-10.801	-1.04583	5.6284e-05	0.000818676	-1.04583	0
Y_P7	-9.51266	-9.51701	-9.5472	-9.75367	-9.78005	-9.23686	-9.52563	-9.59019	0.0645675	0.73397	0.804351	0	0
C_P6	-11.4057	-11.517	-11.3837	-9.25891	-9.45812	-10.4906	-11.4355	-9.73588	-1.69961	0.0114516	0.0286291	0	0
E_P6	-7.55489	-7.57841	-7.59115	-7.51266	-7.50206	-7.43617	-7.57482	-7.48363	-0.0911846	0.0252762	0.0517305	0	0
F_P6	-9.25891	-9.19509	-9.28417	-9.04318	-9.29462	-8.86913	-9.24605	-9.06898	-0.177077	0.233588	0.329288	0	0
G_P6	-7.77016	-7.85405	-7.76479	-7.85555	-7.79819	-7.81602	-7.79633	-7.82326	0.0269212	0.466679	0.565671	0	0
H_P6	-9.75367	-9.78005	-9.73163	-9.30621	-9.34709	-9.86913	-9.75512	-9.50748	-0.247638	0.244706	0.339488	0	0
I_P6	-8.43174	-8.51701	-8.46314	-9.25891	-8.93205	-8.5472	-8.47063	-8.91272	0.442088	0.0997768	0.159643	0	0
K_P6	-7.72125	-7.69258	-7.6675	-7.61319	-7.70966	-7.78167	-7.69378	-7.70151	0.00772826	0.887363	0.904319	0	0
L_P6	-7.87325	-7.97269	-8.00123	-7.62814	-7.50206	-7.53285	-7.94906	-7.55435	-0.39471	0.00189807	0.00788808	-0.39471	0
M_P6	-10.1256	-9.93205	-10.1036	-9.51266	-9.24399	-9.19106	-10.0538	-9.31591	-0.737857	0.00321782	0.0118357	0	0
N_P6	-8.85555	-8.85405	-8.79874	-8.68954	-8.54739	-8.94313	-8.83611	-8.72669	-0.109427	0.403476	0.498778	0	0
P_P6	-8.43174	-8.34709	-8.3837	-8.43174	-8.26909	-8.00123	-8.38751	-8.23402	-0.153491	0.296255	0.396659	0	0
Q_P6	-7.98429	-7.89252	-7.94313	-8.06336	-8.14778	-8.4097	-7.93998	-8.20695	0.266965	0.0681131	0.115468	0	0
R_P6	-8.02328	-8.07961	-8.1036	-8.30621	-8.37406	-8.26032	-8.06883	-8.31353	0.244702	0.00385958	0.0132803	0	0
S_P6	-7.5266	-7.45812	-7.47681	-7.65852	-7.69258	-7.96224	-7.48718	-7.77111	0.283935	0.0445246	0.0823577	0	0
T_P6	-8.23582	-8.32062	-8.28417	-8.38021	-8.40154	-8.30842	-8.2802	-8.36339	0.0831858	0.090004	0.146199	0	0
V_P6	-8.12564	-8.21933	-8.21378	-7.77016	-7.89252	-7.6061	-8.18625	-7.75626	-0.429991	0.0082384	0.0229242	0	0
W_P6	-12.2131	-12.517	-12.6061	-10.4057	-10.4015	-10.8691	-12.4454	-10.5588	-1.8866	0.000645279	0.00382388	-1.8866	0
Y_P6	-9.45822	-9.45812	-9.5472	-9.2131	-9.14778	-9.73163	-9.48785	-9.36417	-0.123676	0.544658	0.643139	0	0
C_P5	-12.2131	-12.517	-12.6061	-9.82079	-9.57841	-9.6675	-12.4454	-9.6889	-2.75651	3.75263e-05	0.000817542	-2.75651	0
D_P5	-8.38021	-8.37406	-8.35817	-8.02328	-8.07961	-8.04131	-8.37081	-8.04807	-0.322746	5.51194e-05	0.000818676	-0.322746	0
E_P5	-7.96518	-7.89252	-7.94313	-7.72125	-7.65903	-7.5472	-7.93361	-7.6425	-0.291115	0.0062262	0.0183418	0	0
F_P5	-9.08382	-9.24399	-9.19106	-9.25891	-9.01451	-8.90566	-9.17296	-9.05969	-0.113266	0.378861	0.479192	0	0
G_P5	-7.83806	-7.81657	-7.88728	-7.90932	-8.1247	-8.08253	-7.84731	-8.03885	0.191546	0.0503117	0.090959	0	0
H_P5	-9.75367	-9.78005	-9.73163	-9.30621	-9.19509	-9.06178	-9.75512	-9.18769	-0.567424	0.00140398	0.00651121	-0.567424	0
I_P5	-8.45822	-8.67571	-8.51863	-8.43174	-8.74442	-8.6675	-8.55085	-8.61456	0.0637013	0.606826	0.695983	0	0
K_P5	-7.55489	-7.53212	-7.5472	-7.72125	-7.74442	-7.94313	-7.54474	-7.80294	0.258197	0.0217661	0.0458234	0	0
L_P5	-8.00365	-8.01451	-8.02113	-7.5266	-7.62624	-7.30842	-8.0131	-7.48709	-0.526012	0.00500359	0.0161732	0	0
M_P5	-10.3062	-10.1951	-10.1911	-9.51266	-9.57841	-9.86913	-10.2308	-9.6534	-0.577383	0.0075738	0.0215604	0	0
N_P5	-8.9277	-8.74442	-8.76479	-8.9277	-8.89252	-8.79874	-8.81231	-8.87299	0.060682	0.432519	0.530291	0	0
P_P5	-8.19074	-8.29462	-8.23686	-7.9277	-7.99345	-8.21378	-8.24074	-8.04498	-0.195763	0.0993533	0.159643	0	0
Q_P5	-8.38021	-8.29462	-8.4097	-8.2131	-7.99345	-8.4097	-8.36151	-8.20542	-0.156093	0.280107	0.381423	0	0
R_P5	-8.28237	-8.37406	-8.33308	-8.2131	-8.24399	-8.12497	-8.32983	-8.19402	-0.13581	0.0378008	0.0715756	0	0
S_P5	-7.62814	-7.59418	-7.57635	-7.68954	-7.72694	-7.76479	-7.59956	-7.72709	0.127534	0.00857827	0.0231558	0	0
T_P5	-7.68954	-7.79819	-7.78167	-8.51266	-8.40154	-8.06178	-7.75647	-8.32533	0.568857	0.0152243	0.0347984	0	0
V_P5	-7.72125	-7.61012	-7.63647	-7.98429	-7.81657	-8.1036	-7.65595	-7.96815	0.312204	0.0253803	0.0517305	0	0
W_P5	-11.2131	-11.517	-11.6061	-10.8912	-10.9321	-10.4906	-11.4454	-10.7713	-0.674123	0.0216415	0.0458234	0	0
Y_P5	-9.68954	-9.78005	-9.6675	-9.51266	-9.40154	-9.5472	-9.71236	-9.48713	-0.225228	0.0156795	0.0355847	0	0
A_P4	-7.51266	-7.51701	-7.49062	-7.80371	-7.76213	-7.6519	-7.50677	-7.73925	0.232481	0.00722454	0.0208275	0	0
C_P4	-12.6281	-12.517	-12.6061	-10.2131	-9.78005	-10.1911	-12.5838	-10.0614	-2.52235	6.38632e-05	0.000888532	-2.52235	0
D_P4	-8.35512	-8.29462	-8.33308	-7.94632	-7.93205	-8.28417	-8.32761	-8.05418	-0.273428	0.0786299	0.130143	0	0
E_P4	-7.55489	-7.59418	-7.59115	-7.40575	-7.38773	-7.6061	-7.58007	-7.46653	-0.113548	0.18554	0.267445	0	0
F_P4	-9.30621	-9.24399	-9.28417	-9.12564	-9.19509	-9.23686	-9.27813	-9.18586	-0.0922625	0.0681985	0.115468	0	0
G_P4	-7.65852	-7.67571	-7.6519	-7.85555	-7.74442	-8.16869	-7.66204	-7.92289	0.260847	0.109639	0.172831	0	0
H_P4	-9.75367	-9.70966	-9.73163	-10.3062	-10.0145	-9.5472	-9.73165	-9.95598	0.224324	0.368305	0.467689	0	0
I_P4	-8.82079	-8.97269	-8.86913	-8.23582	-8.32062	-8.26032	-8.88754	-8.27225	-0.615283	0.000279188	0.00229077	-0.615283	0
L_P4	-7.98429	-7.95223	-7.92427	-7.72125	-7.65903	-7.34557	-7.9536	-7.57528	-0.378311	0.0323235	0.0622296	0	0
M_P4	-10.0432	-10.102	-10.1036	-9.62814	-9.45812	-9.28417	-10.0829	-9.45681	-0.626107	0.00347744	0.0122284	0	0
N_P4	-8.48518	-8.48727	-8.5472	-8.56925	-8.54739	-8.57635	-8.50655	-8.56433	0.0577772	0.0593242	0.103736	0	0
P_P4	-8.06336	-7.99345	-8.00123	-8.10458	-8.21933	-7.98161	-8.01935	-8.10184	0.0824918	0.316475	0.416673	0	0
Q_P4	-7.89118	-7.93205	-7.94313	-8.40575	-8.64254	-8.30842	-7.92212	-8.45224	0.530117	0.00618436	0.0183418	0	0
R_P4	-8.40575	-8.42955	-8.35817	-8.30621	-8.29462	-8.14667	-8.39782	-8.24917	-0.148656	0.0552625	0.0982444	0	0
S_P4	-7.47164	-7.48727	-7.47681	-7.65852	-7.56282	-7.68326	-7.47857	-7.63487	0.156293	0.0134483	0.031643	0	0
V_P4	-8.30621	-8.26909	-8.3837	-7.75367	-7.99345	-8.1036	-8.31967	-7.95024	-0.369428	0.0272946	0.0545892	0	0
W_P4	-11.8912	-11.78	-11.8691	-10.4057	-10.6425	-10.8691	-11.8468	-10.6391	-1.20764	0.000940376	0.00469513	-1.20764	0
Y_P4	-9.62814	-9.57841	-9.6061	-9.68954	-9.85405	-9.43617	-9.60422	-9.65992	0.0557033	0.672612	0.755213	0	0
A_P3	-7.59839	-7.51701	-7.57635	-7.72125	-7.76213	-7.88728	-7.56392	-7.79022	0.226299	0.0151683	0.0347984	0	0
C_P3	-13.2131	-13.102	-13.1911	-10.5127	-10.78	-9.79874	-13.1687	-10.3638	-2.8049	0.000681685	0.00388957	-2.8049	0
D_P3	-9.00365	-8.93205	-8.98161	-8.25891	-8.29462	-8.1036	-8.97244	-8.21904	-0.753394	0.000268902	0.00226444	-0.753394	0
E_P3	-7.96518	-7.99345	-8.00123	-7.72125	-7.69258	-7.81602	-7.98662	-7.74329	-0.243336	0.00332201	0.0119443	0	0
F_P3	-9.25891	-9.14778	-9.14667	-8.65852	-8.81657	-8.79874	-9.18445	-8.75794	-0.426507	0.00238558	0.00942452	-0.426507	0
G_P3	-7.89118	-7.85405	-7.85121	-8.43174	-8.32062	-7.85121	-7.86548	-8.20119	0.335712	0.13296	0.200603	0	0
H_P3	-9.40575	-9.45812	-9.5472	-9.96518	-10.0145	-9.19106	-9.47036	-9.72358	0.253226	0.401124	0.498778	0	0
I_P3	-8.65852	-8.51701	-8.5472	-8.38021	-8.37406	-8.51863	-8.57424	-8.4243	-0.149943	0.0787151	0.130143	0	0
L_P3	-7.80371	-7.81657	-7.85121	-7.28237	-7.42955	-7.3837	-7.82383	-7.36521	-0.458625	0.000556109	0.00353355	-0.458625	0
M_P3	-9.75367	-9.93205	-9.79874	-9.82079	-10.102	-9.1036	-9.82816	-9.67545	-0.152702	0.639717	0.725587	0	0
N_P3	-8.75367	-8.78005	-8.73163	-8.51266	-8.74442	-8.46314	-8.75512	-8.57341	-0.181707	0.107333	0.170032	0	0
P_P3	-8.30621	-8.42955	-8.33308	-8.68954	-8.24399	-7.81602	-8.35628	-8.24985	-0.106428	0.697779	0.772628	0	0
Q_P3	-7.87325	-7.89252	-7.85121	-8.25891	-8.07961	-8.43617	-7.87233	-8.25823	0.385901	0.0204007	0.0441096	0	0
R_P3	-7.67395	-7.59418	-7.6519	-8.02328	-8.03589	-8.35817	-7.64001	-8.13911	0.499103	0.0112405	0.0286291	0	0
S_P3	-7.68954	-7.69258	-7.6519	-7.44492	-7.54739	-7.88728	-7.67801	-7.62653	-0.0514807	0.721033	0.792888	0	0
T_P3	-7.85555	-7.89252	-7.96224	-7.90932	-7.99345	-8.49062	-7.90344	-8.13113	0.227693	0.283714	0.383074	0	0
V_P3	-7.83806	-7.78005	-7.81602	-8.04318	-7.76213	-7.92427	-7.81138	-7.90986	0.0984818	0.302024	0.401027	0	0
W_P3	-11.6281	-11.517	-11.6061	-10.7537	-10.517	-11.0211	-11.5838	-10.7639	-0.819811	0.00538913	0.0167429	0	0
Y_P3	-9.45822	-9.51701	-9.5472	-9.30621	-9.24399	-9.43617	-9.50748	-9.32879	-0.178684	0.045664	0.0830254	0	0
A_P2	-7.55489	-7.57841	-7.5617	-7.83806	-7.70966	-7.90566	-7.565	-7.81779	0.25279	0.0120085	0.0291417	0	0
C_P2	-11.2131	-11.2946	-11.3837	-9.96518	-10.102	-10.1911	-11.2971	-10.0861	-1.21107	0.00012299	0.00135713	-1.21107	0
D_P2	-8.62814	-8.64254	-8.79874	-8.35512	-8.17124	-8.00123	-8.68981	-8.17587	-0.513944	0.011373	0.0286291	0	0
E_P2	-8.54068	-8.54739	-8.49062	-7.47164	-7.64254	-7.5617	-8.52623	-7.55863	-0.9676	5.10302e-05	0.000818676	-0.9676	0
F_P2	-10.5127	-10.4015	-10.6061	-8.45822	-8.29462	-9.23686	-10.5068	-8.66323	-1.84353	0.00341138	0.0121294	0	0
G_P2	-8.54068	-8.29462	-8.43617	-8.04318	-8.40154	-8.04131	-8.42382	-8.16201	-0.261815	0.133526	0.200603	0	0
H_P2	-9.96518	-10.0145	-9.86913	-9.82079	-10.2946	-9.49062	-9.94961	-9.86868	-0.0809312	0.750126	0.813696	0	0
I_P2	-8.85555	-8.85405	-8.76479	-8.59839	-8.45812	-8.30842	-8.8248	-8.45498	-0.369822	0.0141661	0.032849	0	0
K_P2	-7.96518	-8.03589	-7.96224	-7.87325	-7.87316	-7.88728	-7.98777	-7.8779	-0.109871	0.0109932	0.0283694	0	0
M_P2	-9.40575	-9.51701	-9.5472	-9.51266	-9.64254	-9.3837	-9.48999	-9.51297	0.0229825	0.802979	0.849423	0	0
N_P2	-8.48518	-8.57841	-8.51863	-9.16871	-8.85405	-9.1036	-8.52741	-9.04212	0.514708	0.00668544	0.0194486	0	0
P_P2	-8.62814	-8.74442	-8.6061	-7.90932	-8.37406	-8.4097	-8.65955	-8.23103	-0.428528	0.0620309	0.107544	0	0
Q_P2	-8.19074	-8.19509	-8.19106	-8.19074	-8.29462	-8.26032	-8.19229	-8.24856	0.0562661	0.139722	0.207958	0	0
R_P2	-8.14702	-8.17124	-8.14667	-8.10458	-8.10198	-8.35817	-8.15497	-8.18824	0.0332687	0.716573	0.790701	0	0
S_P2	-7.82079	-7.81657	-7.83351	-7.75367	-7.65903	-7.34557	-7.82362	-7.58609	-0.237531	0.126626	0.19481	0	0
T_P2	-7.59839	-7.57841	-7.6061	-8.10458	-7.83519	-8.06178	-7.5943	-8.00052	0.406213	0.00842085	0.0231558	0	0
W_P2	-13.2131	-13.102	-12.6061	-11.0432	-10.78	-10.4906	-12.9737	-10.7713	-2.20244	0.000854523	0.00445113	-2.20244	0
Y_P2	-9.96518	-10.0145	-9.94313	-9.2131	-9.34709	-9.49062	-9.97427	-9.35027	-0.624003	0.00166485	0.00736077	-0.624003	0
A_P1	-7.29424	-7.26909	-7.2722	-7.61319	-7.85405	-8.06178	-7.27851	-7.84301	0.564498	0.0121843	0.0293156	0	0
C_P1	-11.8912	-12.102	-11.8691	-9.51266	-9.78005	-10.0211	-11.9541	-9.77128	-2.18281	0.000186575	0.00178141	-2.18281	0
D_P1	-8.54068	-8.57841	-8.6061	-8.30621	-8.40154	-8.12497	-8.57506	-8.27757	-0.29749	0.0233466	0.0488296	0	0
E_P1	-8.25891	-8.24399	-8.21378	-7.68954	-7.37406	-7.42287	-8.23889	-7.49549	-0.743403	0.00167918	0.00736077	-0.743403	0
F_P1	-8.89118	-8.97269	-8.94313	-8.75367	-8.89252	-9.14667	-8.93567	-8.93095	-0.00471349	0.969925	0.979104	0	0
G_P1	-7.89118	-8.03589	-7.90566	-8.00365	-7.93205	-7.98161	-7.94424	-7.97244	0.0281959	0.607424	0.695983	0	0
H_P1	-9.16871	-9.29462	-9.14667	-9.2131	-9.19509	-9.49062	-9.20333	-9.2996	0.0962709	0.415831	0.511792	0	0
I_P1	-10.5127	-10.78	-10.6061	-8.72125	-8.51701	-8.49062	-10.6329	-8.57629	-2.05664	4.31777e-05	0.000817542	-2.05664	0
L_P1	-8.68954	-8.78005	-8.76479	-7.36761	-7.34709	-7.28417	-8.74479	-7.33296	-1.41184	2.99995e-06	0.000319995	-1.41184	0
M_P1	-9.51266	-9.51701	-9.3837	-9.56925	-9.51701	-9.79874	-9.47113	-9.62833	0.157207	0.180223	0.260957	0	0
S_P1	-7.87325	-7.83519	-7.85121	-7.58375	-7.59418	-7.6675	-7.85322	-7.61514	-0.238076	0.00113291	0.00541091	-0.238076	0
T_P1	-8.89118	-8.93205	-8.86913	-8.28237	-8.51701	-8.16869	-8.89745	-8.32269	-0.574762	0.00527209	0.0167037	0	0
V_P1	-10.3062	-10.4015	-10.6061	-8.14702	-8.03589	-8.19106	-10.4379	-8.12465	-2.3133	2.05179e-05	0.000652319	-2.3133	0
W_P1	-12.2131	-12.102	-12.1911	-10.2131	-10.517	-10.6061	-12.1687	-10.4454	-1.72331	0.000154048	0.00159017	-1.72331	0
Y_P1	-8.9277	-8.85405	-8.90566	-9.00365	-9.34709	-9.23686	-8.8958	-9.19587	0.300065	0.0442344	0.0822966	0	0
C_P1'	-11.8912	-12.102	-11.8691	-10.2131	-10.0145	-9.73163	-11.9541	-9.98641	-1.96768	0.000240183	0.00207726	-1.96768	0
D_P1'	-9.25891	-9.19509	-9.28417	-8.14702	-8.1247	-8.35817	-9.24605	-8.20996	-1.03609	0.000194842	0.00178141	-1.03609	0
E_P1'	-9.00365	-8.97269	-9.06178	-7.61319	-7.76213	-7.69921	-9.01271	-7.69151	-1.3212	1.26321e-05	0.000577468	-1.3212	0
F_P1'	-8.96518	-9.14778	-9.02113	-9.00365	-8.89252	-9.02113	-9.0447	-8.97244	-0.072261	0.343887	0.445522	0	0
G_P1'	-7.90932	-8.03589	-7.92427	-7.80371	-7.83519	-7.6212	-7.95649	-7.75337	-0.203126	0.0592451	0.103736	0	0
H_P1'	-9.40575	-9.24399	-9.43617	-9.56925	-9.34709	-9.5472	-9.36197	-9.48785	0.125875	0.245068	0.339488	0	0
I_P1'	-10.0432	-10.0145	-10.0211	-8.23582	-8.61012	-8.33308	-10.0263	-8.39301	-1.63327	0.000130724	0.00139439	-1.63327	0
K_P1'	-7.55489	-7.53212	-7.47681	-7.80371	-8.03589	-7.74812	-7.52128	-7.86257	0.341296	0.0200304	0.0436037	0	0
L_P1'	-8.10458	-8.05758	-8.21378	-7.56925	-7.61012	-7.49062	-8.12531	-7.55666	-0.56865	0.000608858	0.00374682	-0.56865	0
M_P1'	-9.89118	-9.78005	-9.6675	-9.96518	-9.57841	-9.5472	-9.77957	-9.69693	-0.0826425	0.608985	0.695983	0	0
N_P1'	-8.40575	-8.54739	-8.49062	-8.62814	-8.57841	-8.43617	-8.48125	-8.54758	0.0663238	0.401475	0.498778	0	0
P_P1'	-10.7537	-10.517	-10.6061	-8.00365	-8.07961	-7.83351	-10.6256	-7.97226	-2.65334	1.21254e-05	0.000577468	-2.65334	0
Q_P1'	-8.48518	-8.64254	-8.46314	-8.65852	-8.32062	-8.6061	-8.53029	-8.52841	-0.00187951	0.988177	0.989324	0	0
T_P1'	-8.00365	-8.05758	-8.02113	-8.40575	-8.14778	-8.6675	-8.02746	-8.40701	0.379553	0.0656522	0.112598	0	0
V_P1'	-8.78684	-8.78005	-8.76479	-7.94632	-8.05758	-8.1036	-8.77723	-8.03583	-0.741395	9.54721e-05	0.00125094	-0.741395	0
W_P1'	-11.8912	-12.102	-11.8691	-10.4057	-10.517	-11.1911	-11.9541	-10.7046	-1.24949	0.00819139	0.0229242	0	0
Y_P1'	-9.30621	-9.05758	-9.14667	-9.35512	-9.14778	-10.2842	-9.17015	-9.59569	0.425537	0.299027	0.398703	0	0
A_P2'	-7.44492	-7.48727	-7.43617	-7.67395	-7.54739	-7.5617	-7.45612	-7.59434	0.138226	0.0324761	0.0622296	0	0
C_P2'	-12.2131	-11.517	-12.1911	-10.5127	-10.102	-10.0211	-11.9737	-10.2119	-1.7618	0.00302834	0.0112682	0	0
D_P2'	-8.56925	-8.54739	-8.5472	-8.65852	-8.32062	-8.57635	-8.55461	-8.51849	-0.0361191	0.741148	0.808549	0	0
E_P2'	-7.89118	-7.79819	-7.83351	-7.51266	-7.59418	-7.78167	-7.84096	-7.6295	-0.211455	0.0657997	0.112598	0	0
F_P2'	-9.62814	-9.70966	-9.6061	-8.78684	-8.70966	-9.1036	-9.64797	-8.8667	-0.781268	0.00329922	0.0119443	0	0
G_P2'	-7.83806	-7.91215	-7.79874	-7.64325	-7.67571	-8.02113	-7.84965	-7.78003	-0.0696213	0.608353	0.695983	0	0
H_P2'	-9.45822	-9.19509	-9.28417	-9.30621	-10.0145	-9.86913	-9.31249	-9.72995	0.417462	0.142899	0.209778	0	0
I_P2'	-8.25891	-8.21933	-8.16869	-8.68954	-8.26909	-8.26032	-8.21564	-8.40632	0.190673	0.25612	0.351753	0	0
L_P2'	-7.98429	-7.97269	-8.1036	-7.58375	-7.59418	-7.34557	-8.02019	-7.50783	-0.512359	0.00496067	0.0161732	0	0
M_P2'	-10.0432	-10.102	-10.0211	-9.45822	-9.57841	-9.79874	-10.0554	-9.61179	-0.443639	0.0124025	0.0293985	0	0
N_P2'	-9.35512	-9.34709	-9.28417	-8.78684	-8.70966	-8.73163	-9.32879	-8.74271	-0.586085	5.29208e-05	0.000818676	-0.586085	0
P_P2'	-9.45822	-9.40154	-9.43617	-7.94632	-8.07961	-8.1036	-9.43197	-8.04317	-1.3888	1.13531e-05	0.000577468	-1.3888	0
Q_P2'	-8.00365	-8.07961	-8.12497	-8.59839	-8.40154	-8.21378	-8.06941	-8.40457	0.33516	0.0452012	0.0829663	0	0
R_P2'	-8.2131	-8.24399	-8.23686	-8.02328	-8.29462	-8.51863	-8.23132	-8.27884	0.0475242	0.757162	0.818553	0	0
T_P2'	-8.00365	-8.07961	-8.00123	-8.10458	-8.54739	-7.94313	-8.02816	-8.19837	0.170202	0.403699	0.498778	0	0
V_P2'	-8.12564	-8.21933	-8.26032	-7.96518	-8.05758	-7.90566	-8.20177	-7.97614	-0.225627	0.0192521	0.0424873	0	0
W_P2'	-13.2131	-13.102	-13.1911	-10.2131	-10.102	-10.8691	-13.1687	-10.3947	-2.77398	0.000329281	0.00263425	-2.77398	0
Y_P2'	-9.82079	-9.85405	-9.86913	-9.62814	-9.19509	-9.02113	-9.84799	-9.28145	-0.566535	0.0352049	0.0670569	0	0
A_P3'	-7.39293	-7.36051	-7.39664	-7.80371	-7.65903	-7.90566	-7.38336	-7.78947	0.406108	0.00497843	0.0161732	0	0
C_P3'	-11.8912	-11.78	-11.8691	-10.6281	-10.2946	-10.1036	-11.8468	-10.3421	-1.50467	0.000662277	0.00385325	-1.50467	0
D_P3'	-8.2131	-8.19509	-8.28417	-8.12564	-8.42955	-8.19106	-8.23079	-8.24875	0.0179643	0.861056	0.883134	0	0
E_P3'	-7.94632	-7.99345	-7.96224	-7.54068	-7.53212	-7.69921	-7.96734	-7.59067	-0.376668	0.00255505	0.0098508	-0.376668	0
F_P3'	-9.12564	-9.05758	-9.06178	-8.65852	-8.85405	-9.06178	-9.08167	-8.85811	-0.223553	0.132264	0.200603	0	0
G_P3'	-8.00365	-7.89252	-7.96224	-8.06336	-7.85405	-7.88728	-7.9528	-7.93489	-0.01791	0.81726	0.849423	0	0
H_P3'	-9.68954	-9.51701	-9.6675	-9.56925	-9.29462	-10.2842	-9.62468	-9.71601	0.0913282	0.775892	0.833173	0	0
I_P3'	-8.54068	-8.51701	-8.5472	-8.35512	-8.70966	-8.5472	-8.53497	-8.53733	0.00236314	0.982773	0.988954	0	0
K_P3'	-7.85555	-7.83519	-7.74812	-8.04318	-7.83519	-8.12497	-7.81295	-8.00111	0.18816	0.11122	0.174462	0	0
L_P3'	-7.96518	-7.91215	-7.98161	-7.39293	-7.50206	-7.32069	-7.95298	-7.40523	-0.54775	0.00064361	0.00382388	-0.54775	0
M_P3'	-9.51266	-9.45812	-9.5472	-9.16871	-9.64254	-9.19106	-9.506	-9.3341	-0.171891	0.333773	0.434176	0	0
N_P3'	-8.54068	-8.74442	-8.69921	-8.45822	-8.89252	-8.94313	-8.66144	-8.76462	0.103187	0.5675	0.662774	0	0
P_P3'	-7.98429	-8.14778	-8.04131	-8.08382	-7.83519	-8.04131	-8.05779	-7.98677	-0.0710182	0.476487	0.571574	0	0
Q_P3'	-8.2131	-8.24399	-8.26032	-8.38021	-9.05758	-8.30842	-8.23914	-8.58207	0.34293	0.224743	0.319634	0	0
R_P3'	-8.54068	-8.45812	-8.46314	-8.23582	-8.19509	-7.98161	-8.48731	-8.13751	-0.349807	0.0136683	0.0319259	0	0
S_P3'	-7.9277	-7.89252	-7.81602	-7.9277	-7.64254	-7.59115	-7.87875	-7.72046	-0.158284	0.222683	0.318118	0	0
T_P3'	-8.40575	-8.51701	-8.43617	-8.30621	-8.03589	-8.16869	-8.45298	-8.17026	-0.282714	0.02901	0.0566048	0	0
V_P3'	-8.14702	-8.29462	-8.19106	-7.9277	-7.81657	-8.5472	-8.2109	-8.09716	-0.113739	0.648901	0.731156	0	0
W_P3'	-11.6281	-11.78	-11.6061	-10.4057	-10.6425	-10.0211	-11.6714	-10.3565	-1.31495	0.0022493	0.0089972	-1.31495	0
Y_P3'	-9.35512	-9.29462	-9.3837	-9.45822	-9.70966	-8.46314	-9.34448	-9.21034	-0.134145	0.742855	0.808549	0	0
A_P4'	-7.80371	-7.78005	-7.76479	-7.85555	-7.81657	-7.42287	-7.78285	-7.69833	-0.0845183	0.575071	0.669174	0	0
C_P4'	-12.2131	-12.102	-12.1911	-10.3062	-10.78	-9.6061	-12.1687	-10.2308	-1.93793	0.00481727	0.0160576	0	0
D_P4'	-7.94632	-8.03589	-8.06178	-8.04318	-8.24399	-8.49062	-8.01466	-8.25926	0.244604	0.142062	0.209778	0	0
E_P4'	-7.41869	-7.38773	-7.43617	-7.59839	-7.59418	-7.71533	-7.4142	-7.63597	0.22177	0.00624769	0.0183418	0	0
F_P4'	-9.40575	-9.40154	-9.43617	-9.12564	-8.85405	-9.1036	-9.41449	-9.02776	-0.386724	0.0116361	0.0288647	0	0
G_P4'	-7.65852	-7.69258	-7.6519	-8.06336	-8.01451	-7.85121	-7.66767	-7.97636	0.308693	0.00915682	0.0242164	0	0
H_P4'	-10.0432	-10.102	-10.0211	-9.56925	-9.34709	-9.28417	-10.0554	-9.40017	-0.655261	0.00187318	0.00788706	-0.655261	0
I_P4'	-8.68954	-8.67571	-8.69921	-8.54068	-8.34709	-8.43617	-8.68815	-8.44131	-0.24684	0.0118761	0.0291417	0	0
K_P4'	-7.89118	-7.87316	-7.85121	-7.77016	-7.93205	-7.94313	-7.87185	-7.88178	0.00993359	0.870303	0.889767	0	0
L_P4'	-8.35512	-8.26909	-8.19106	-7.44492	-7.42955	-7.33308	-8.27176	-7.40252	-0.86924	0.000122761	0.00135713	-0.86924	0
M_P4'	-10.1256	-10.1951	-10.2842	-9.96518	-9.10198	-8.98161	-10.2016	-9.34959	-0.852046	0.0529288	0.0951529	0	0
N_P4'	-8.45822	-8.45812	-8.46314	-8.72125	-8.34709	-8.76479	-8.45982	-8.61104	0.15122	0.317713	0.416673	0	0
P_P4'	-8.19074	-8.21933	-8.12497	-8.10458	-8.14778	-8.23686	-8.17835	-8.16307	-0.0152723	0.765937	0.825252	0	0
Q_P4'	-8.25891	-8.26909	-8.35817	-8.65852	-8.40154	-8.3837	-8.29539	-8.48125	0.185864	0.119784	0.186979	0	0
R_P4'	-8.23582	-8.32062	-8.28417	-8.04318	-7.97269	-8.14667	-8.2802	-8.05418	-0.226024	0.0158166	0.0356431	0	0
S_P4'	-7.67395	-7.64254	-7.6519	-7.54068	-8.10198	-7.88728	-7.65613	-7.84331	0.187181	0.31685	0.416673	0	0
T_P4'	-7.94632	-7.99345	-7.98161	-8.06336	-8.26909	-8.51863	-7.97379	-8.28369	0.309901	0.0793058	0.130143	0	0
V_P4'	-8.45822	-8.45812	-8.43617	-7.98429	-8.05758	-7.83351	-8.45084	-7.95846	-0.492378	0.00176167	0.00761801	-0.492378	0
W_P4'	-12.2131	-12.102	-12.1911	-10.6281	-10.102	-11.3837	-12.1687	-10.7046	-1.46411	0.0172515	0.0383366	0	0
Y_P4'	-11.0432	-10.9321	-11.0211	-9.25891	-9.29462	-9.79874	-10.9988	-9.45076	-1.54803	0.000953698	0.00469513	-1.54803	0
A_P5'	-7.87325	-7.79819	-7.81602	-7.58375	-7.89252	-7.74812	-7.82916	-7.74146	-0.0876944	0.394589	0.495171	0	0
C_P5'	-13.2131	-13.102	-13.1911	-10.2131	-10.4015	-10.3837	-13.1687	-10.3328	-2.83593	2.09448e-06	0.000319995	-2.83593	0
D_P5'	-8.10458	-7.97269	-8.02113	-8.30621	-8.01451	-8.33308	-8.0328	-8.21793	0.185133	0.164759	0.240744	0	0
E_P5'	-7.54068	-7.59418	-7.51863	-7.59839	-7.62624	-7.71533	-7.55116	-7.64665	0.0954895	0.0843383	0.137695	0	0
F_P5'	-9.56925	-9.85405	-9.6061	-8.62814	-9.05758	-8.90566	-9.67646	-8.86379	-0.812671	0.00622323	0.0183418	0	0
G_P5'	-8.04318	-8.03589	-8.04131	-7.82079	-8.05758	-8.23686	-8.04013	-8.03841	-0.00171551	0.989324	0.989324	0	0
H_P5'	-9.75367	-9.78005	-9.94313	-9.68954	-9.64254	-9.23686	-9.82562	-9.52298	-0.302634	0.123383	0.190737	0	0
I_P5'	-8.59839	-8.51701	-8.57635	-8.85555	-8.45812	-8.57635	-8.56392	-8.63001	0.0660881	0.611998	0.696937	0	0
K_P5'	-7.83806	-7.78005	-7.86913	-7.87325	-7.81657	-7.6675	-7.82908	-7.78577	-0.0433062	0.551466	0.648783	0	0
L_P5'	-7.89118	-8.01451	-7.90566	-7.49886	-7.36051	-7.37088	-7.93712	-7.41008	-0.527033	0.000874896	0.00445113	-0.527033	0
M_P5'	-10.0432	-9.85405	-9.94313	-9.25891	-10.102	-9.5472	-9.94679	-9.63603	-0.310757	0.287242	0.386208	0	0
N_P5'	-8.78684	-8.70966	-8.69921	-8.89118	-8.81657	-8.57635	-8.7319	-8.76137	0.029465	0.780636	0.835463	0	0
P_P5'	-8.19074	-8.21933	-8.21378	-8.28237	-8.10198	-7.86913	-8.20795	-8.08449	-0.123458	0.361458	0.460823	0	0
Q_P5'	-8.12564	-8.21933	-8.12497	-8.25891	-8.54739	-8.43617	-8.15665	-8.41416	0.257507	0.0453722	0.0829663	0	0
R_P5'	-8.54068	-8.51701	-8.57635	-8.14702	-8.19509	-7.88728	-8.54468	-8.07646	-0.468221	0.00852445	0.0231558	0	0
S_P5'	-7.61319	-7.65903	-7.69921	-7.85555	-7.47262	-8.04131	-7.65714	-7.78983	0.132685	0.476907	0.571574	0	0
T_P5'	-8.10458	-8.1247	-8.12497	-8.38021	-8.10198	-8.1036	-8.11808	-8.19526	0.0771802	0.452009	0.549973	0	0
V_P5'	-8.10458	-8.07961	-8.08253	-7.82079	-7.95223	-8.02113	-8.08891	-7.93138	-0.157524	0.0565845	0.100039	0	0
W_P5'	-12.6281	-12.517	-12.6061	-11.6281	-10.9321	-10.4906	-12.5838	-11.0169	-1.56681	0.00925784	0.0242829	0	0
Y_P5'	-9.56925	-9.78005	-9.6061	-8.82079	-9.19509	-9.6061	-9.6518	-9.20732	-0.444475	0.132658	0.200603	0	0
A_P6'	-7.89118	-7.91215	-7.86913	-7.80371	-7.62624	-7.6675	-7.89082	-7.69915	-0.191669	0.0252981	0.0517305	0	0
C_P6'	-13.2131	-13.102	-12.6061	-10.4057	-10.102	-9.6675	-12.9737	-10.0584	-2.91532	0.000508452	0.00338968	-2.91532	0
D_P6'	-7.98429	-8.03589	-8.06178	-8.16871	-8.37406	-8.5472	-8.02732	-8.36332	0.336007	0.0396649	0.0742267	0	0
E_P6'	-7.47164	-7.45812	-7.47681	-7.47164	-7.56282	-7.74812	-7.46886	-7.59419	0.125333	0.199045	0.285624	0	0
F_P6'	-9.62814	-9.70966	-9.6061	-8.48518	-8.57841	-8.83351	-9.64797	-8.63237	-1.0156	0.000732443	0.00404107	-1.0156	0
G_P6'	-7.80371	-7.76213	-7.73163	-8.00365	-7.79819	-7.57635	-7.76582	-7.79273	0.0269095	0.840256	0.864572	0	0
H_P6'	-9.56925	-9.45812	-9.6061	-9.89118	-9.64254	-9.49062	-9.54449	-9.67478	0.130292	0.355879	0.455525	0	0
I_P6'	-8.68954	-8.64254	-8.63647	-8.51266	-8.89252	-8.46314	-8.65619	-8.62278	-0.0334104	0.818892	0.849423	0	0
K_P6'	-7.96518	-7.91215	-7.98161	-7.90932	-7.89252	-8.02113	-7.95298	-7.94099	-0.0119846	0.80517	0.849423	0	0
L_P6'	-7.64325	-7.74442	-7.6675	-7.40575	-7.51701	-7.33308	-7.68506	-7.41861	-0.266443	0.012374	0.0293985	0	0
M_P6'	-10.0432	-10.102	-10.0211	-9.62814	-9.24399	-9.14667	-10.0554	-9.3396	-0.715829	0.00861105	0.0231558	0	0
N_P6'	-8.85555	-8.81657	-8.79874	-8.82079	-8.93205	-8.86913	-8.82362	-8.87399	0.050367	0.23776	0.333053	0	0
P_P6'	-8.35512	-8.40154	-8.46314	-7.96518	-8.29462	-8.30842	-8.4066	-8.1894	-0.217195	0.13563	0.202811	0	0
Q_P6'	-8.30621	-8.21933	-8.3837	-8.38021	-8.24399	-8.23686	-8.30308	-8.28702	-0.0160596	0.821183	0.849423	0	0
R_P6'	-8.65852	-8.61012	-8.63647	-8.16871	-8.05758	-8.16869	-8.63504	-8.13166	-0.503375	0.000220474	0.00195977	-0.503375	0
S_P6'	-7.85555	-7.89252	-7.79874	-8.10458	-7.91215	-7.74812	-7.84894	-7.92162	0.0726768	0.53267	0.631312	0	0
T_P6'	-8.16871	-8.21933	-8.16869	-8.00365	-8.40154	-8.06178	-8.18558	-8.15565	-0.0299237	0.822878	0.849423	0	0
V_P6'	-7.98429	-8.03589	-7.98161	-8.23582	-7.78005	-8.5472	-8.00059	-8.18769	0.187099	0.449547	0.549065	0	0
W_P6'	-11.6281	-11.2946	-11.6061	-10.2131	-11.517	-10.8691	-11.5096	-10.8664	-0.643204	0.175753	0.25564	0	0
Y_P6'	-9.96518	-9.93205	-10.0211	-8.96518	-8.85405	-9.06178	-9.97279	-8.96033	-1.01245	0.000101639	0.00125094	-1.01245	0
A_P7'	-7.80371	-7.91215	-7.74812	-7.82079	-7.78005	-7.74812	-7.82133	-7.78298	-0.0383433	0.506077	0.604271	0	0
C_P7'	-12.2131	-12.102	-12.1911	-9.96518	-10.4015	-9.6675	-12.1687	-10.0114	-2.15731	0.000563159	0.00353355	-2.15731	0
D_P7'	-7.9277	-8.01451	-8.00123	-8.12564	-8.17124	-8.33308	-7.98115	-8.20999	0.228836	0.0287966	0.0565332	0	0
E_P7'	-7.56925	-7.51701	-7.5472	-7.87325	-7.51701	-7.6675	-7.54449	-7.68592	0.141433	0.246793	0.340404	0	0
F_P7'	-9.56925	-9.51701	-9.49062	-8.89118	-8.45812	-9.28417	-9.52563	-8.87782	-0.647805	0.0539314	0.0964137	0	0
G_P7'	-7.49886	-7.44376	-7.47681	-7.70531	-7.97269	-8.21378	-7.47315	-7.96393	0.490782	0.0293122	0.0568479	0	0
H_P7'	-9.68954	-9.51701	-9.6675	-9.40575	-9.93205	-9.86913	-9.62468	-9.73564	0.110959	0.559582	0.65592	0	0
I_P7'	-8.75367	-8.70966	-8.76479	-8.38021	-8.61012	-8.04131	-8.74271	-8.34388	-0.398825	0.0742183	0.124345	0	0
K_P7'	-8.02328	-7.95223	-8.04131	-7.64325	-7.89252	-7.85121	-8.00561	-7.79566	-0.209947	0.0621741	0.107544	0	0
L_P7'	-7.94632	-7.97269	-7.92427	-7.65852	-7.44376	-7.34557	-7.94776	-7.48262	-0.465145	0.00761351	0.0215604	0	0
M_P7'	-10.6281	-10.6425	-10.7316	-9.2131	-9.70966	-9.06178	-10.6674	-9.32818	-1.33926	0.002508	0.00978731	-1.33926	0
N_P7'	-8.82079	-8.81657	-8.86913	-8.65852	-8.74442	-9.02113	-8.8355	-8.80802	-0.0274727	0.816212	0.849423	0	0
P_P7'	-8.33046	-8.42955	-8.3837	-8.08382	-7.99345	-8.06178	-8.38124	-8.04635	-0.334889	0.00106036	0.00514113	-0.334889	0
Q_P7'	-8.30621	-8.37406	-8.30842	-8.45822	-8.40154	-8.19106	-8.32956	-8.35027	0.020709	0.817957	0.849423	0	0
R_P7'	-8.16871	-8.17124	-8.12497	-8.10458	-8.21933	-8.3837	-8.15497	-8.23587	0.0808994	0.381688	0.480867	0	0
S_P7'	-7.9277	-7.89252	-7.92427	-7.78684	-8.05758	-7.96224	-7.91483	-7.93555	0.0207215	0.808577	0.849423	0	0
T_P7'	-8.10458	-8.10198	-8.12497	-8.23582	-7.89252	-8.23686	-8.11051	-8.12174	0.011228	0.926816	0.938548	0	0
V_P7'	-8.35512	-8.45812	-8.3837	-8.00365	-8.21933	-7.85121	-8.39898	-8.02473	-0.374251	0.0280913	0.0558337	0	0
W_P7'	-12.6281	-12.102	-12.6061	-11.0432	-10.1951	-10.3837	-12.4454	-10.5407	-1.90475	0.00352556	0.0122628	0	0
Y_P7'	-9.96518	-10.0145	-9.94313	-9.51266	-8.97269	-9.02113	-9.97427	-9.16883	-0.805443	0.00976988	0.0254176	0	0
A_P8'	-7.5266	-7.47262	-7.5472	-7.67395	-7.74442	-7.79874	-7.51548	-7.73904	0.223562	0.00621235	0.0183418	0	0
C_P8'	-14.2131	-14.102	-14.1911	-9.82079	-9.93205	-10.3837	-14.1687	-10.0455	-4.1232	1.94309e-05	0.000652319	-4.1232	0
D_P8'	-8.12564	-8.14778	-8.06178	-8.06336	-8.21933	-7.94313	-8.11173	-8.07527	-0.0364585	0.686682	0.765639	0	0
E_P8'	-7.41869	-7.40154	-7.42287	-7.70531	-7.70966	-7.42287	-7.41437	-7.61261	0.198248	0.105476	0.167921	0	0
F_P8'	-9.68954	-9.85405	-9.79874	-8.96518	-8.70966	-8.73163	-9.78078	-8.80215	-0.978623	0.000500414	0.00338968	-0.978623	0
G_P8'	-7.90932	-7.81657	-7.86913	-7.83806	-7.76213	-7.88728	-7.86501	-7.82916	-0.035853	0.472375	0.570415	0	0
H_P8'	-10.0432	-10.0145	-9.94313	-9.89118	-9.57841	-10.0211	-10.0003	-9.83024	-0.170033	0.275446	0.376679	0	0
I_P8'	-8.65852	-8.61012	-8.63647	-8.78684	-8.32062	-8.86913	-8.63504	-8.65886	0.0238261	0.896134	0.910359	0	0
K_P8'	-7.90932	-7.87316	-7.90566	-7.77016	-7.62624	-8.06178	-7.89605	-7.81939	-0.0766528	0.583312	0.676304	0	0
L_P8'	-8.12564	-8.05758	-8.04131	-7.38021	-7.59418	-7.14667	-8.07485	-7.37369	-0.701158	0.00600347	0.0183418	0	0
M_P8'	-9.96518	-10.0145	-10.0211	-9.82079	-9.05758	-9.5472	-10.0003	-9.47519	-0.525084	0.078965	0.130143	0	0
N_P8'	-9.04318	-8.97269	-8.98161	-8.54068	-8.67571	-8.6675	-8.99916	-8.62796	-0.371197	0.00162845	0.00733951	-0.371197	0
P_P8'	-8.48518	-8.54739	-8.5472	-8.10458	-7.97269	-8.19106	-8.52659	-8.08944	-0.437147	0.00281521	0.0107246	0	0
Q_P8'	-8.14702	-8.21933	-8.14667	-8.56925	-8.74442	-8.3837	-8.171	-8.56579	0.394788	0.0209699	0.0450361	0	0
R_P8'	-8.45822	-8.32062	-8.3837	-8.48518	-8.17124	-8.06178	-8.38751	-8.2394	-0.148113	0.327763	0.428098	0	0
S_P8'	-7.77016	-7.81657	-7.78167	-7.72125	-7.93205	-7.79874	-7.78947	-7.81735	0.0278804	0.681538	0.76256	0	0
T_P8'	-8.12564	-8.19509	-8.1036	-7.83806	-8.32062	-8.6061	-8.14144	-8.25493	0.113485	0.641691	0.725587	0	0
V_P8'	-8.10458	-8.32062	-8.28417	-8.28237	-8.05758	-8.04131	-8.23645	-8.12709	-0.109368	0.346134	0.445604	0	0
W_P8'	-11.6281	-11.78	-11.8691	-9.96518	-11.2946	-11.0211	-11.7591	-10.7603	-0.998796	0.0721477	0.121512	0	0
Y_P8'	-9.89118	-10.102	-10.0211	-9.35512	-9.34709	-9.28417	-10.0048	-9.32879	-0.675969	0.000493586	0.00338968	-0.675969	0

## Sheet: spec_MPro_4hrs
ID	specificity_1	specificity_2	specificity_3	specificity_CTRL_1	specificity_CTRL_2	specificity_CTRL_3	median_specificity	median_CTRL_specificity	FC	pval	p_val_adj	FC significant	FC significant positive
R_P1'	-7.34735	-7.243	-7.19819	-8.16678	-8.09516	-8.38802	-7.26285	-8.21665	0.953802	0.000638948	0.00601363	0.953802	0.953802
Q_P1	-7.42981	-7.51645	-7.4932	-8.28461	-8.50396	-8.41074	-7.47982	-8.39977	0.91995	0.000179126	0.00382135	0.91995	0.91995
N_P1	-7.75174	-7.59376	-7.64655	-8.48165	-8.52905	-8.50537	-7.66402	-8.50536	0.841343	6.43299e-05	0.00225599	0.841343	0.841343
L_P2	-6.54458	-6.56104	-6.48715	-7.37977	-7.37326	-7.30055	-6.53093	-7.3512	0.820269	1.72191e-05	0.00128292	0.820269	0.820269
R_P3	-7.61039	-7.51645	-7.55513	-8.28461	-8.15249	-8.32193	-7.56066	-8.25301	0.692356	0.000285617	0.00478313	0.692356	0.692356
S_P1'	-7.13876	-7.243	-7.23827	-7.79481	-7.74723	-7.6601	-7.20668	-7.73405	0.527368	0.000534772	0.00548554	0.527368	0.527368
G_P8	-7.5538	-7.51645	-7.55513	-8.05784	-8.04002	-8.10262	-7.54179	-8.06682	0.525031	2.0082e-05	0.00128292	0.525031	0.525031
G_P7'	-7.41294	-7.52905	-7.54253	-8.00631	-8.04002	-7.92859	-7.49484	-7.99164	0.496798	0.000707592	0.00611971	0.496798	0.496798
K_P3	-7.36347	-7.37326	-7.35459	-7.77311	-7.83838	-7.81816	-7.36377	-7.80989	0.446111	2.40547e-05	0.00128292	0.446111	0.446111
D_P4'	-8.05784	-8.05816	-7.9957	-8.41294	-8.38466	-8.53004	-8.03724	-8.44255	0.405311	0.00117556	0.00835952	0.405311	0.405311
R_P1	-7.81684	-7.77698	-7.81816	-8.16678	-8.29585	-8.1592	-7.80399	-8.20728	0.403284	0.000961155	0.00699022	0.403284	0.403284
A_P2'	-7.42981	-7.45505	-7.41074	-7.73068	-7.77698	-7.70152	-7.43187	-7.73639	0.304525	0.000279333	0.00478313	0.304525	0.304525
R_P6	-7.95656	-7.96963	-7.89616	-8.19535	-8.25342	-8.21809	-7.94078	-8.22229	0.281503	0.000568804	0.00551568	0.281503	0.281503
A_P8	-7.41294	-7.38466	-7.36565	-7.66928	-7.63402	-7.60666	-7.38775	-7.63665	0.248902	0.000395957	0.00478313	0.248902	0.248902
C_P8	-12.2542	-12.04	-12.0661	-10.5173	-10.6615	-10.2181	-12.1201	-10.4656	-1.65449	0.000354904	0.00478313	-1.65449	0
D_P8	-8.25424	-8.17212	-8.17856	-8.28461	-8.15249	-8.50537	-8.20164	-8.31416	0.112518	0.349343	0.430758	0	0
E_P8	-7.23929	-7.27448	-7.26908	-7.73068	-7.62048	-7.42223	-7.26095	-7.59113	0.33018	0.0221159	0.0528141	0	0
F_P8	-9.44689	-9.50396	-9.48113	-8.31564	-8.43121	-8.83343	-9.47733	-8.52676	-0.950566	0.00382607	0.0159006	0	0
H_P8	-10.0318	-9.96963	-9.86446	-9.44689	-9.40775	-9.38802	-9.95531	-9.41422	-0.541093	0.000475366	0.00531546	-0.541093	0
I_P8	-8.88501	-9.00439	-9.10262	-8.11128	-8.17212	-8.32193	-8.99734	-8.20178	-0.795561	0.000856789	0.00668714	-0.795561	0
K_P8	-7.42981	-7.29585	-7.28999	-7.70992	-7.76203	-8.08424	-7.33855	-7.85206	0.513512	0.0150133	0.0390589	0	0
L_P8	-8.13876	-8.11402	-8.06609	-7.75174	-7.73259	-7.54253	-8.10629	-7.67562	-0.430671	0.00355932	0.0151991	0	0
M_P8	-9.44689	-9.60706	-9.68758	-8.8392	-9.04002	-8.9957	-9.58051	-8.95831	-0.6222	0.00263236	0.0138091	0	0
N_P8	-9.13876	-9.00439	-9.10262	-8.37977	-8.4793	-9.06609	-9.08192	-8.64172	-0.440203	0.113413	0.179664	0	0
P_P8	-8.34735	-8.13313	-8.14009	-7.93231	-8.00439	-8.1592	-8.20686	-8.03197	-0.174887	0.145892	0.218156	0	0
Q_P8	-8.22449	-8.27448	-8.25873	-8.51728	-8.58058	-8.30055	-8.25257	-8.46614	0.213568	0.0680912	0.120382	0	0
R_P8	-8.22449	-8.29585	-8.27949	-8.62975	-8.4793	-8.36565	-8.26661	-8.49157	0.224953	0.0473174	0.0923266	0	0
S_P8	-7.44689	-7.49158	-7.45728	-8.00631	-8.09516	-7.74416	-7.46525	-7.94854	0.483296	0.0104188	0.0303093	0	0
T_P8	-8.08432	-8.19202	-8.19819	-8.05784	-8.11402	-8.1592	-8.15818	-8.11035	-0.047823	0.368134	0.446223	0	0
V_P8	-8.11128	-8.31755	-8.32193	-8.31564	-8.17212	-7.96175	-8.25025	-8.14984	-0.100416	0.463668	0.547505	0	0
W_P8	-11.0318	-11.192	-11.0661	-11.0318	-10.9025	-10.1401	-11.0967	-10.6915	-0.405169	0.22474	0.303447	0	0
Y_P8	-10.2542	-10.2745	-10.388	-9.08432	-8.93568	-9.06609	-10.3056	-9.02869	-1.27689	3.41995e-05	0.00136798	-1.27689	0
A_P7	-7.62975	-7.62048	-7.60666	-7.53542	-7.6615	-7.80305	-7.61896	-7.66666	0.047699	0.571974	0.633639	0	0
C_P7	-12.2542	-11.3619	-11.388	-10.0318	-9.71809	-10.0661	-11.6681	-9.93868	-1.72939	0.00526504	0.0198213	0	0
D_P7	-7.88501	-7.85415	-7.89616	-8.00631	-8.2122	-8.60666	-7.87844	-8.27506	0.396616	0.0880236	0.147474	0	0
E_P7	-7.18099	-7.27448	-7.28999	-7.42981	-7.52905	-7.41074	-7.24849	-7.45653	0.208049	0.0141718	0.037172	0	0
F_P7	-9.66928	-9.90251	-9.9957	-8.79481	-9.15249	-8.63313	-9.85583	-8.86014	-0.995687	0.00538568	0.0199853	0	0
G_P7	-7.86192	-7.80735	-7.75866	-7.98122	-8.13313	-7.61983	-7.80931	-7.91139	0.10208	0.546455	0.615723	0	0
H_P7	-9.75174	-9.60706	-9.74416	-9.75174	-9.71809	-9.38802	-9.70099	-9.61928	-0.0817042	0.549634	0.617133	0	0
I_P7	-8.8392	-8.80735	-8.83343	-8.59128	-8.74723	-8.53004	-8.82666	-8.62285	-0.203814	0.0356406	0.0721835	0	0
K_P7	-7.53542	-7.50396	-7.46915	-8.22449	-7.96963	-7.84886	-7.50285	-8.01433	0.51148	0.0103999	0.0303093	0	0
L_P7	-7.93231	-7.93568	-7.96175	-7.22449	-7.15249	-7.41074	-7.94325	-7.26257	-0.680674	0.000926895	0.00692605	-0.680674	0
M_P7	-10.1388	-9.83838	-9.80305	-9.66928	-9.45505	-9.38802	-9.92673	-9.50412	-0.422617	0.0360806	0.0726151	0	0
N_P7	-8.70992	-8.77698	-8.80305	-8.48165	-8.50396	-8.71559	-8.76332	-8.56707	-0.19625	0.0691335	0.121553	0	0
P_P7	-8.8392	-8.60706	-8.63313	-8.28461	-8.11402	-8.45728	-8.69313	-8.2853	-0.407826	0.0297438	0.0638793	0	0
Q_P7	-8.25424	-8.23266	-8.1592	-8.59128	-8.36194	-8.23827	-8.21537	-8.39716	0.181797	0.165585	0.241424	0	0
R_P7	-8.22449	-8.13313	-8.1592	-8.31564	-8.31755	-8.21809	-8.17227	-8.28376	0.111489	0.0590705	0.107401	0	0
S_P7	-7.64938	-7.74723	-7.77331	-8.00631	-7.76203	-7.54253	-7.72331	-7.77029	0.0469838	0.752617	0.797475	0	0
T_P7	-7.73068	-7.88621	-7.86446	-8.41294	-8.27448	-8.77331	-7.82712	-8.48691	0.659794	0.0134989	0.0362996	0	0
V_P7	-7.8392	-7.85415	-7.7881	-7.8392	-7.90251	-8.08424	-7.82715	-7.94198	0.114832	0.205858	0.286412	0	0
W_P7	-11.8392	-11.777	-11.8031	-10.5173	-10.777	-10.8031	-11.8064	-10.6991	-1.10731	0.000284909	0.00478313	-1.10731	0
Y_P7	-9.59128	-9.60706	-9.68758	-9.25424	-9.71809	-9.53004	-9.62864	-9.50079	-0.127848	0.406527	0.485406	0	0
A_P6	-7.44689	-7.51645	-7.46915	-7.8392	-8.05816	-7.86446	-7.4775	-7.92061	0.443109	0.00356228	0.0151991	0	0
C_P6	-11.8392	-12.04	-12.0661	-9.75174	-9.55459	-10.2181	-11.9818	-9.84147	-2.1403	0.000516099	0.00548554	-2.1403	0
D_P6	-7.77311	-7.82278	-7.84886	-8.25424	-8.09516	-7.91228	-7.81492	-8.08723	0.272308	0.0547056	0.101778	0	0
E_P6	-7.79481	-7.60706	-7.56784	-7.59128	-7.45505	-7.38802	-7.65657	-7.47812	-0.178453	0.12471	0.191055	0	0
F_P6	-9.75174	-9.50396	-9.48113	-9.19535	-9.15249	-8.92859	-9.57894	-9.09214	-0.486802	0.0152994	0.0391791	0	0
G_P6	-7.81684	-7.77698	-7.71559	-8.13876	-8.04002	-7.9957	-7.7698	-8.05816	0.288357	0.00500421	0.0192934	0	0
H_P6	-9.8392	-9.60706	-9.68758	-9.51728	-9.36194	-9.58066	-9.71128	-9.48663	-0.224652	0.0753603	0.129652	0	0
I_P6	-8.41294	-8.4793	-8.55513	-8.75174	-9.04002	-8.63313	-8.48246	-8.8083	0.32584	0.0630717	0.112127	0	0
K_P6	-7.61039	-7.55459	-7.53004	-7.68946	-7.6615	-7.9957	-7.565	-7.78222	0.217217	0.118671	0.185726	0	0
L_P6	-8.05784	-8.13313	-8.14009	-7.34735	-7.52905	-7.43382	-8.11035	-7.43674	-0.673611	0.000329358	0.00478313	-0.673611	0
M_P6	-10.0318	-9.71809	-9.74416	-9.51728	-9.31755	-9.25873	-9.83137	-9.36452	-0.466846	0.0214883	0.0517012	0	0
N_P6	-8.98122	-8.93568	-8.89616	-8.59128	-8.74723	-8.9957	-8.93769	-8.77807	-0.159619	0.25523	0.338895	0	0
P_P6	-8.37977	-8.38466	-8.48113	-8.00631	-8.29585	-8.12123	-8.41519	-8.14113	-0.274055	0.0387348	0.0769883	0	0
Q_P6	-7.79481	-7.9869	-7.92859	-8.22449	-7.96963	-8.55513	-7.90343	-8.24975	0.346316	0.124783	0.191055	0	0
S_P6	-7.39626	-7.4793	-7.58066	-7.70992	-7.71809	-7.92859	-7.48541	-7.78553	0.300124	0.0282285	0.0618707	0	0
T_P6	-8.28461	-8.31755	-8.32193	-8.19535	-8.45505	-7.96175	-8.30803	-8.20405	-0.10398	0.507296	0.588169	0	0
V_P6	-8.03185	-8.11402	-8.10262	-7.98122	-7.79209	-7.80305	-8.08283	-7.85879	-0.224038	0.0280285	0.0618707	0	0
W_P6	-12.2542	-11.192	-11.2181	-11.0318	-10.4551	-10.4811	-11.5548	-10.656	-0.898775	0.0863938	0.146275	0	0
Y_P6	-9.66928	-9.50396	-9.68758	-9.51728	-9.31755	-9.63313	-9.62027	-9.48932	-0.130955	0.296272	0.376218	0	0
A_P5	-7.18099	-7.10456	-7.0934	-8.00631	-7.70373	-7.80305	-7.12631	-7.8377	0.711385	0.00158264	0.0102545	0	0
C_P5	-12.2542	-12.777	-12.8031	-9.31564	-9.45505	-9.80305	-12.6114	-9.52458	-3.08684	0.000178663	0.00382135	-3.08684	0
D_P5	-8.22449	-8.36194	-8.41074	-8.25424	-8.13313	-8.17856	-8.33239	-8.18864	-0.143748	0.094975	0.154274	0	0
E_P5	-8.19535	-7.96963	-7.9957	-7.42981	-7.55459	-7.5936	-8.05356	-7.526	-0.527557	0.00369268	0.0155481	0	0
F_P5	-9.37977	-8.93568	-8.92859	-9.31564	-9.31755	-8.96175	-9.08135	-9.19831	0.116969	0.572255	0.633639	0	0
G_P5	-7.68946	-7.85415	-7.81816	-7.98122	-7.74723	-8.23827	-7.78726	-7.98891	0.201653	0.250954	0.334606	0	0
H_P5	-10.1388	-9.83838	-9.9957	-9.31564	-9.6615	-9.17856	-9.99095	-9.38524	-0.605712	0.022581	0.0535254	0	0
I_P5	-8.44689	-8.4793	-8.43382	-9.08432	-8.40775	-8.34362	-8.45334	-8.6119	0.15856	0.540629	0.61348	0	0
K_P5	-7.44689	-7.52905	-7.54253	-7.62975	-7.76203	-7.86446	-7.50616	-7.75208	0.245923	0.0295596	0.0638793	0	0
L_P5	-7.90847	-7.9869	-8.01298	-7.51728	-7.6477	-7.34362	-7.96945	-7.50287	-0.466584	0.00754439	0.0254127	0	0
M_P5	-10.6693	-9.71809	-9.80305	-9.31564	-9.60706	-9.68758	-10.0635	-9.53676	-0.526715	0.179575	0.258846	0	0
N_P5	-8.70992	-8.68952	-8.77331	-8.88501	-8.60706	-8.86446	-8.72425	-8.78551	0.0612575	0.545724	0.615723	0	0
P_P5	-8.00631	-8.13313	-8.23827	-8.48165	-8.07654	-7.9957	-8.1259	-8.18463	0.0587281	0.739289	0.785955	0	0
Q_P5	-8.25424	-8.23266	-8.23827	-7.95656	-8.38466	-8.30055	-8.24172	-8.21393	-0.0277977	0.842461	0.872452	0	0
R_P5	-8.41294	-8.27448	-8.17856	-8.28461	-8.13313	-8.19819	-8.28866	-8.20531	-0.0833504	0.361362	0.43968	0	0
S_P5	-7.57242	-7.58058	-7.56784	-7.64938	-7.59376	-7.54253	-7.57361	-7.59522	0.0216088	0.525148	0.598034	0	0
T_P5	-7.93231	-8.04002	-7.94507	-8.31564	-8.50396	-8.53004	-7.97247	-8.44988	0.477413	0.00321671	0.014705	0	0
V_P5	-7.68946	-7.88621	-7.84886	-7.77311	-8.05816	-8.01298	-7.80818	-7.94809	0.13991	0.261366	0.344186	0	0
W_P5	-12.2542	-11.777	-11.8031	-10.6693	-11.192	-11.0661	-11.9448	-10.9758	-0.968964	0.0118213	0.0328942	0	0
Y_P5	-9.8392	-9.77698	-9.80305	-9.37977	-9.71809	-9.43382	-9.80641	-9.51056	-0.295853	0.0498821	0.0946509	0	0
A_P4	-7.61039	-7.52905	-7.54253	-7.68946	-7.73259	-7.60666	-7.56066	-7.67623	0.115578	0.0609852	0.110189	0	0
C_P4	-12.2542	-12.3619	-12.388	-9.93231	-10.9025	-9.9957	-12.3347	-10.2768	-2.05789	0.0028709	0.0140368	0	0
D_P4	-8.22449	-8.33958	-8.32193	-8.05784	-8.11402	-8.21809	-8.29533	-8.12998	-0.165348	0.0487502	0.0941678	0	0
E_P4	-7.51728	-7.4793	-7.50537	-7.77311	-7.6477	-7.80305	-7.50065	-7.74129	0.240639	0.007918	0.0258547	0	0
F_P4	-9.13876	-9.27448	-9.30055	-9.25424	-8.77698	-9.10262	-9.23793	-9.04461	-0.193321	0.265487	0.348179	0	0
G_P4	-7.51728	-7.6615	-7.63313	-7.93231	-8.19202	-7.96175	-7.60397	-8.02869	0.424725	0.0103628	0.0303093	0	0
H_P4	-9.66928	-9.71809	-9.74416	-9.25424	-9.96963	-9.58066	-9.71051	-9.60151	-0.108999	0.627851	0.688056	0	0
I_P4	-8.75174	-8.68952	-8.71559	-8.48165	-8.29585	-8.45728	-8.71895	-8.4116	-0.307355	0.00729942	0.0248491	0	0
K_P4	-7.62975	-7.60706	-7.61983	-7.79481	-7.9869	-7.92859	-7.61888	-7.90343	0.284553	0.00764446	0.0254815	0	0
L_P4	-8.05784	-8.02209	-8.03047	-7.61039	-7.55459	-7.36565	-8.0368	-7.51021	-0.526593	0.00214953	0.012283	0	0
M_P4	-10.6693	-9.77698	-9.74416	-9.44689	-9.96963	-8.96175	-10.0635	-9.45942	-0.604052	0.223898	0.303447	0	0
N_P4	-8.70992	-8.90251	-8.74416	-8.75174	-8.71809	-8.34362	-8.78553	-8.60448	-0.181047	0.27596	0.354647	0	0
P_P4	-8.00631	-7.82278	-7.86446	-7.8392	-8.23266	-7.92859	-7.89785	-8.00015	0.102299	0.479751	0.562346	0	0
Q_P4	-7.88501	-8.00439	-8.04817	-8.16678	-8.17212	-8.45728	-7.97919	-8.26539	0.286204	0.0564446	0.103213	0	0
R_P4	-8.5538	-8.29585	-8.25873	-8.25424	-8.17212	-8.21809	-8.36946	-8.21482	-0.154646	0.181715	0.260757	0	0
S_P4	-7.61039	-7.63402	-7.6601	-7.75174	-7.58058	-8.01298	-7.63484	-7.78177	0.146933	0.310143	0.392276	0	0
T_P4	-7.70992	-7.96963	-7.91228	-8.51728	-8.11402	-8.43382	-7.86394	-8.35504	0.491094	0.0281925	0.0618707	0	0
V_P4	-8.19535	-8.05816	-8.04817	-7.90847	-7.71809	-7.9957	-8.10056	-7.87408	-0.226475	0.075093	0.129652	0	0
W_P4	-11.2542	-11.3619	-11.388	-10.5173	-10.3619	-10.5807	-11.3347	-10.4866	-0.848107	0.000382249	0.00478313	-0.848107	0
Y_P4	-9.66928	-9.77698	-9.80305	-9.44689	-9.31755	-9.21809	-9.74977	-9.32751	-0.422262	0.00560665	0.0199853	0	0
A_P3	-7.62975	-7.77698	-7.81816	-7.81684	-7.76203	-7.9957	-7.74163	-7.85819	0.116558	0.268661	0.350904	0	0
C_P3	-12.8392	-12.777	-12.8031	-9.66928	-10.114	-10.2181	-12.8064	-10.0005	-2.80595	7.75498e-05	0.00225599	-2.80595	0
D_P3	-8.79481	-8.83838	-8.96175	-7.88501	-8.2122	-8.03047	-8.86498	-8.04256	-0.822425	0.00154309	0.0102545	0	0
E_P3	-7.8392	-7.83838	-7.86446	-7.31564	-7.56753	-7.54253	-7.84735	-7.47523	-0.372115	0.00989488	0.0303093	0	0
F_P3	-9.51728	-9.60706	-9.53004	-9.13876	-8.43121	-9.10262	-9.55146	-8.89086	-0.660594	0.0463842	0.091061	0	0
G_P3	-8.00631	-8.00439	-8.01298	-7.77311	-8.19202	-8.04817	-8.00789	-8.00443	-0.00346091	0.978886	0.991277	0	0
H_P3	-9.75174	-9.71809	-9.63313	-10.1388	-10.3619	-9.34362	-9.70099	-9.94811	0.247124	0.471379	0.554563	0	0
I_P3	-8.8392	-8.74723	-8.74416	-8.34735	-8.45505	-8.30055	-8.77687	-8.36765	-0.409213	0.00178589	0.0107827	0	0
L_P3	-8.08432	-7.82278	-7.84886	-7.75174	-7.39616	-7.41074	-7.91865	-7.51955	-0.399107	0.0491438	0.0941678	0	0
M_P3	-9.93231	-9.6615	-9.63313	-9.44689	-9.60706	-9.43382	-9.74232	-9.49592	-0.246394	0.0894802	0.148361	0	0
N_P3	-8.51728	-8.80735	-8.6601	-8.44689	-8.93568	-8.96175	-8.66158	-8.78144	0.119863	0.556854	0.623054	0	0
P_P3	-8.28461	-8.15249	-8.19819	-8.28461	-8.29585	-8.23827	-8.21177	-8.27291	0.0611472	0.224153	0.303447	0	0
Q_P3	-7.81684	-7.85415	-7.88022	-8.59128	-8.27448	-8.23827	-7.8504	-8.36801	0.517607	0.0103737	0.0303093	0	0
S_P3	-7.75174	-7.79209	-7.77331	-7.57242	-7.62048	-7.4455	-7.77238	-7.54613	-0.226247	0.0133633	0.0362396	0	0
T_P3	-7.90847	-7.90251	-7.84886	-8.62975	-7.90251	-8.17856	-7.88661	-8.23694	0.35033	0.175052	0.253468	0	0
V_P3	-7.75174	-7.68952	-7.64655	-7.98122	-8.17212	-8.06609	-7.69594	-8.07314	0.377207	0.00393534	0.0159406	0	0
W_P3	-11.5173	-11.777	-11.8031	-10.8392	-11.04	-10.5807	-11.6991	-10.82	-0.879143	0.00549782	0.0199853	0	0
Y_P3	-8.98122	-9.40775	-9.43382	-9.66928	-9.23266	-9.74416	-9.27426	-9.5487	0.274436	0.2741	0.353677	0	0
A_P2	-7.42981	-7.58058	-7.63313	-7.81684	-7.83838	-8.12123	-7.54784	-7.92548	0.377641	0.0307668	0.0652011	0	0
C_P2	-11.0318	-10.9025	-10.9286	-10.8392	-9.60706	-9.86446	-10.9543	-10.1036	-0.850744	0.0871894	0.146845	0	0
D_P2	-8.70992	-8.77698	-8.77331	-8.22449	-8.31755	-8.14009	-8.7534	-8.22738	-0.526025	0.000700078	0.00611971	-0.526025	0
E_P2	-8.48165	-8.58058	-8.50537	-7.57242	-7.52905	-7.4455	-8.52254	-7.51566	-1.00688	2.98036e-05	0.00136245	-1.00688	0
F_P2	-10.0318	-9.71809	-9.68758	-8.93231	-8.77698	-9.17856	-9.8125	-8.96262	-0.849885	0.00611274	0.0212617	0	0
G_P2	-8.28461	-8.50396	-8.41074	-8.31564	-8.02209	-7.89616	-8.39977	-8.07797	-0.321805	0.0824412	0.140326	0	0
H_P2	-10.2542	-10.192	-10.2181	-10.3798	-9.07654	-9.48113	-10.2215	-9.64581	-0.575637	0.20971	0.289254	0	0
I_P2	-8.98122	-8.96963	-8.96175	-8.16678	-8.58058	-8.53004	-8.97087	-8.4258	-0.545068	0.0139376	0.037167	0	0
K_P2	-7.90847	-7.58058	-7.61983	-7.86192	-8.02209	-8.04817	-7.70296	-7.97739	0.274434	0.0817556	0.139903	0	0
M_P2	-9.93231	-9.40775	-9.53004	-10.0318	-9.50396	-9.80305	-9.62337	-9.77962	0.156256	0.517037	0.591517	0	0
N_P2	-8.31564	-8.50396	-8.45728	-9.03185	-8.80735	-8.77331	-8.42563	-8.87084	0.445209	0.0108139	0.0308161	0	0
P_P2	-8.70992	-8.77698	-8.80305	-8.16678	-8.09516	-7.92859	-8.76332	-8.06351	-0.699812	0.000765608	0.00612486	-0.699812	0
Q_P2	-8.11128	-8.04002	-8.04817	-8.05784	-8.50396	-8.41074	-8.06649	-8.32418	0.257693	0.134643	0.204198	0	0
R_P2	-8.19535	-8.00439	-8.04817	-8.05784	-8.27448	-8.10262	-8.08264	-8.14498	0.0623445	0.516516	0.591517	0	0
S_P2	-7.75174	-7.74723	-7.7881	-7.64938	-7.59376	-7.63313	-7.76236	-7.62542	-0.136937	0.00284435	0.0140368	0	0
T_P2	-7.61039	-7.70373	-7.72981	-8.03185	-8.29585	-8.14009	-7.68131	-8.15593	0.474623	0.0049945	0.0192934	0	0
V_P2	-7.79481	-7.85415	-7.89616	-7.8392	-8.09516	-8.14009	-7.84837	-8.02482	0.176443	0.146829	0.218536	0	0
W_P2	-12.2542	-12.777	-12.8031	-10.6693	-10.2745	-10.6876	-12.6114	-10.5438	-2.06765	0.00076366	0.00612486	-2.06765	0
Y_P2	-9.8392	-9.83838	-9.86446	-9.31564	-9.15249	-9.30055	-9.84735	-9.25623	-0.591118	0.000361118	0.00478313	-0.591118	0
A_P1	-7.28461	-7.31755	-7.33273	-7.66928	-7.52905	-7.72981	-7.31163	-7.64271	0.33108	0.00563123	0.0199853	0	0
C_P1	-12.2542	-12.777	-12.8031	-10.6693	-10.2745	-9.86446	-12.6114	-10.2694	-2.34202	0.00133074	0.00906034	-2.34202	0
D_P1	-7.81684	-7.70373	-7.77331	-8.16678	-8.2122	-8.50537	-7.76463	-8.29478	0.530158	0.00882869	0.027487	0	0
E_P1	-8.11128	-7.96963	-7.88022	-7.81684	-7.73259	-7.71559	-7.98704	-7.75501	-0.232039	0.0352716	0.0721835	0	0
F_P1	-9.13876	-9.07654	-9.03047	-8.41294	-9.07654	-8.96175	-9.08192	-8.81708	-0.264846	0.270225	0.351513	0	0
G_P1	-8.03185	-7.9869	-7.94507	-8.41294	-7.77698	-7.7881	-7.98794	-7.99267	0.00473258	0.983231	0.992536	0	0
H_P1	-9.19535	-9.04002	-9.10262	-10.0318	-9.55459	-9.63313	-9.11266	-9.73986	0.627196	0.015349	0.0391791	0	0
I_P1	-10.1388	-10.4551	-10.3006	-8.59128	-8.40775	-8.34362	-10.2981	-8.44755	-1.85057	9.54774e-05	0.00254606	-1.85057	0
K_P1	-7.64938	-7.60706	-7.60666	-8.03185	-7.93568	-7.81816	-7.62103	-7.92856	0.307532	0.0083325	0.026664	0	0
L_P1	-8.34735	-8.36194	-8.23827	-7.36347	-7.52905	-7.38802	-8.31585	-7.42685	-0.889008	0.000162409	0.00382135	-0.889008	0
M_P1	-9.44689	-9.36194	-9.38802	-9.44689	-9.90251	-9.74416	-9.39895	-9.69785	0.298904	0.0926982	0.151344	0	0
P_P1	-7.57242	-7.77698	-7.83343	-8.51728	-8.00439	-7.86446	-7.72761	-8.12871	0.401099	0.133747	0.203805	0	0
S_P1	-7.86192	-8.00439	-7.9957	-7.44689	-7.6615	-7.60666	-7.95401	-7.57168	-0.382323	0.00847219	0.0268426	0	0
T_P1	-9.08432	-8.96963	-8.96175	-7.8392	-8.36194	-8.55513	-9.00523	-8.25209	-0.75314	0.0257468	0.0580209	0	0
V_P1	-9.51728	-9.50396	-9.48113	-7.98122	-7.87009	-7.97863	-9.50079	-7.94331	-1.55748	2.14233e-06	0.000685545	-1.55748	0
W_P1	-11.8392	-11.777	-11.8031	-10.5173	-10.3619	-11.0661	-11.8064	-10.6484	-1.15798	0.00568331	0.0199853	0	0
Y_P1	-8.8392	-9.07654	-9.10262	-9.51728	-9.45505	-9.86446	-9.00612	-9.61226	0.606141	0.0164607	0.0414757	0	0
A_P1'	-7.28461	-7.15249	-7.20811	-7.98122	-7.62048	-7.67377	-7.21507	-7.75849	0.543419	0.0102186	0.0303093	0	0
C_P1'	-11.5173	-12.04	-11.8031	-9.75174	-10.4551	-9.9957	-11.7868	-10.0675	-1.71928	0.00254549	0.0136868	0	0
D_P1'	-9.13876	-9.27448	-9.30055	-8.34735	-8.52905	-8.45728	-9.23793	-8.44456	-0.793372	0.000403576	0.00478313	-0.793372	0
E_P1'	-8.70992	-8.71809	-8.68758	-7.42981	-7.51645	-7.7881	-8.7052	-7.57812	-1.12707	0.000481714	0.00531546	-1.12707	0
F_P1'	-8.93231	-9.19202	-9.14009	-8.5538	-8.74723	-9.03047	-9.08814	-8.77717	-0.310974	0.123073	0.190258	0	0
G_P1'	-7.68946	-7.79209	-7.81816	-7.98122	-7.67544	-7.94507	-7.76657	-7.86725	0.100678	0.388494	0.465611	0	0
H_P1'	-9.51728	-9.45505	-9.53004	-9.66928	-9.40775	-9.92859	-9.50079	-9.66854	0.167749	0.332044	0.416478	0	0
I_P1'	-9.59128	-9.96963	-9.92859	-8.5538	-8.55459	-8.17856	-9.82983	-8.42898	-1.40084	0.00127367	0.00886032	-1.40084	0
K_P1'	-7.73068	-7.59376	-7.4932	-7.81684	-7.87009	-7.80305	-7.60588	-7.82999	0.224114	0.035469	0.0721835	0	0
L_P1'	-8.28461	-8.15249	-8.23827	-7.49935	-7.56753	-7.33273	-8.22513	-7.46654	-0.758586	0.000682108	0.00611971	-0.758586	0
M_P1'	-10.3798	-9.96963	-9.92859	-9.66928	-9.45505	-9.48113	-10.0927	-9.53515	-0.557509	0.0247872	0.0566564	0	0
N_P1'	-8.70992	-8.77698	-8.71559	-9.19535	-8.90251	-8.74416	-8.73416	-8.94734	0.213176	0.186572	0.265346	0	0
P_P1'	-9.31564	-8.90251	-9.03047	-7.86192	-7.95255	-8.23827	-9.08287	-8.01758	-1.06529	0.003074	0.0144659	0	0
Q_P1'	-8.59128	-8.80735	-8.77331	-8.31564	-8.63402	-8.32193	-8.72398	-8.42386	-0.300115	0.0737815	0.129017	0	0
T_P1'	-7.73068	-7.90251	-7.92859	-8.16678	-8.19202	-8.01298	-7.85393	-8.12393	0.269999	0.0319545	0.066833	0	0
V_P1'	-8.5538	-8.80735	-8.83343	-8.00631	-8.09516	-8.17856	-8.73153	-8.09334	-0.638183	0.00334157	0.0148779	0	0
W_P1'	-11.8392	-12.04	-12.0661	-11.0318	-10.2745	-10.5807	-11.9818	-10.629	-1.35277	0.00426636	0.0170655	0	0
Y_P1'	-9.66928	-9.60706	-9.58066	-9.08432	-9.50396	-8.92859	-9.619	-9.17229	-0.446711	0.0619803	0.110803	0	0
C_P2'	-11.5173	-11.777	-11.8031	-9.44689	-10.4551	-9.74416	-11.6991	-9.88203	-1.81707	0.0043641	0.0172409	0	0
D_P2'	-8.5538	-8.6615	-8.58066	-8.31564	-8.15249	-8.1592	-8.59866	-8.20911	-0.389546	0.00334753	0.0148779	0	0
E_P2'	-7.77311	-7.83838	-7.83343	-7.53542	-7.60706	-7.72981	-7.81497	-7.6241	-0.19088	0.0343639	0.0714054	0	0
F_P2'	-9.75174	-9.60706	-9.58066	-8.70992	-8.71809	-9.14009	-9.64649	-8.85603	-0.790454	0.00646501	0.0222452	0	0
G_P2'	-7.90847	-7.96963	-7.91228	-7.95656	-8.05816	-7.7881	-7.93013	-7.93428	0.00415052	0.961684	0.976949	0	0
H_P2'	-9.31564	-9.36194	-9.34362	-9.08432	-9.50396	-9.63313	-9.3404	-9.40714	0.0667334	0.708573	0.755811	0	0
I_P2'	-8.22449	-8.4793	-8.48113	-8.59128	-8.45505	-8.74416	-8.39497	-8.59683	0.201856	0.165979	0.241424	0	0
K_P2'	-7.62975	-7.60706	-7.64655	-8.11128	-7.919	-8.04817	-7.62779	-8.02615	0.398365	0.00231345	0.0127638	0	0
L_P2'	-7.8392	-7.9869	-8.03047	-7.36347	-7.4793	-7.26908	-7.95219	-7.37062	-0.581575	0.00227772	0.0127638	0	0
M_P2'	-10.1388	-9.96963	-9.86446	-9.66928	-9.15249	-9.25873	-9.99095	-9.36017	-0.630781	0.0233674	0.0545808	0	0
N_P2'	-9.31564	-9.15249	-9.10262	-8.75174	-8.43121	-8.86446	-9.19025	-8.68247	-0.507782	0.0247679	0.0566564	0	0
P_P2'	-8.79481	-8.80735	-8.86446	-8.37977	-8.11402	-8.08424	-8.82221	-8.19267	-0.629532	0.00283562	0.0140368	0	0
Q_P2'	-8.28461	-8.33958	-8.34362	-8.62975	-8.4793	-8.36565	-8.3226	-8.49157	0.168962	0.0986759	0.159476	0	0
R_P2'	-8.51728	-8.17212	-8.19819	-8.19535	-8.07654	-8.06609	-8.29586	-8.11266	-0.183203	0.196855	0.278732	0	0
S_P2'	-7.48165	-7.50396	-7.50537	-7.49935	-7.93568	-7.75866	-7.497	-7.73123	0.234235	0.138737	0.208432	0	0
T_P2'	-8.28461	-8.13313	-8.10262	-8.19535	-8.25342	-8.32193	-8.17345	-8.2569	0.0834466	0.281671	0.360539	0	0
V_P2'	-8.00631	-8.04002	-8.1592	-8.22449	-7.93568	-8.21809	-8.06851	-8.12609	0.0575791	0.615576	0.676922	0	0
W_P2'	-12.8392	-12.777	-12.8031	-10.2542	-10.2745	-10.6876	-12.8064	-10.4054	-2.40098	7.24117e-05	0.00225599	-2.40098	0
Y_P2'	-9.59128	-9.60706	-9.63313	-9.19535	-9.40775	-8.80305	-9.61049	-9.13538	-0.475104	0.0554527	0.102572	0	0
A_P3'	-7.37977	-7.41943	-7.42223	-7.51728	-7.90251	-7.5936	-7.40714	-7.67113	0.263985	0.0899618	0.148391	0	0
C_P3'	-11.5173	-11.777	-11.8031	-10.2542	-10.4551	-10.1401	-11.6991	-10.2831	-1.41598	0.000398603	0.00478313	-1.41598	0
D_P3'	-8.19535	-8.17212	-8.32193	-8.11128	-8.04002	-8.38802	-8.2298	-8.17977	-0.0500262	0.688244	0.744047	0	0
E_P3'	-7.86192	-7.80735	-7.83343	-7.68946	-7.60706	-7.64655	-7.83424	-7.64769	-0.186548	0.00283025	0.0140368	0	0
F_P3'	-9.13876	-9.07654	-8.96175	-9.03185	-9.11402	-8.86446	-9.05902	-9.00344	-0.0555792	0.569832	0.633639	0	0
G_P3'	-7.95656	-7.93568	-7.96175	-7.73068	-8.15249	-8.08424	-7.95133	-7.98914	0.0378047	0.78718	0.823194	0	0
H_P3'	-10.1388	-9.90251	-9.80305	-9.37977	-9.55459	-9.34362	-9.94811	-9.42599	-0.522116	0.0117961	0.0328942	0	0
I_P3'	-8.5538	-8.71809	-8.71559	-8.59128	-8.33958	-8.48113	-8.66249	-8.47066	-0.191834	0.102417	0.164672	0	0
K_P3'	-8.08432	-7.919	-7.92859	-7.93231	-7.90251	-7.7881	-7.9773	-7.87431	-0.102991	0.211434	0.290381	0	0
L_P3'	-7.86192	-7.88621	-7.89616	-7.62975	-7.31755	-7.50537	-7.88143	-7.48422	-0.397208	0.0121565	0.0335351	0	0
M_P3'	-9.66928	-9.77698	-9.74416	-9.8392	-10.04	-9.25873	-9.73014	-9.71265	-0.0174891	0.944578	0.96402	0	0
N_P3'	-8.41294	-8.58058	-8.53004	-8.62975	-8.77698	-8.74416	-8.50785	-8.71696	0.209111	0.0351022	0.0721835	0	0
P_P3'	-8.16678	-8.2122	-8.19819	-8.03185	-8.15249	-8.10262	-8.19239	-8.09565	-0.0967378	0.0612926	0.110189	0	0
Q_P3'	-8.19535	-8.29585	-8.32193	-8.37977	-8.50396	-8.32193	-8.27104	-8.40189	0.130844	0.118981	0.185726	0	0
R_P3'	-8.48165	-8.38466	-8.34362	-8.31564	-8.23266	-7.88022	-8.40331	-8.14284	-0.260471	0.1355	0.204529	0	0
S_P3'	-7.95656	-7.96963	-7.9957	-7.70992	-7.56753	-7.94507	-7.97396	-7.74084	-0.233121	0.10292	0.164672	0	0
T_P3'	-8.28461	-8.25342	-8.27949	-8.48165	-8.17212	-8.14009	-8.27251	-8.26462	-0.00788877	0.945945	0.96402	0	0
V_P3'	-8.11128	-8.27448	-8.1592	-7.93231	-7.80735	-7.9957	-8.18165	-7.91179	-0.269865	0.0213906	0.0517012	0	0
W_P3'	-12.2542	-11.777	-12.0661	-10.1388	-11.192	-10.5807	-12.0324	-10.6371	-1.39529	0.0141474	0.037172	0	0
Y_P3'	-9.51728	-9.50396	-9.43382	-9.13876	-8.93568	-9.80305	-9.48502	-9.2925	-0.192521	0.505041	0.587684	0	0
A_P4'	-7.8392	-7.60706	-7.55513	-7.53542	-7.62048	-7.64655	-7.66713	-7.60082	-0.0663124	0.517577	0.591517	0	0
C_P4'	-12.2542	-12.777	-12.8031	-10.2542	-10.114	-9.63313	-12.6114	-10.0005	-2.61096	0.000548554	0.00548554	-2.61096	0
E_P4'	-7.59128	-7.52905	-7.55513	-7.62975	-7.4793	-7.75866	-7.55849	-7.62257	0.0640848	0.48173	0.562604	0	0
F_P4'	-9.31564	-9.40775	-9.43382	-8.66928	-8.45505	-9.06609	-9.38574	-8.73014	-0.655596	0.022935	0.0539647	0	0
G_P4'	-7.66928	-7.70373	-7.68758	-7.77311	-7.70373	-7.70152	-7.68686	-7.72612	0.0392583	0.19887	0.280346	0	0
H_P4'	-10.0318	-10.114	-10.0661	-10.1388	-9.83838	-9.48113	-10.0707	-9.81942	-0.251227	0.259924	0.343701	0	0
I_P4'	-8.79481	-8.87009	-8.86446	-8.22449	-9.07654	-8.45728	-8.84312	-8.58611	-0.257013	0.371213	0.448257	0	0
K_P4'	-7.88501	-7.919	-7.89616	-7.90847	-7.87009	-7.88022	-7.90006	-7.88626	-0.0137974	0.416175	0.495078	0	0
L_P4'	-8.13876	-8.38466	-8.27949	-7.57242	-7.56753	-7.35459	-8.26764	-7.49818	-0.76946	0.00160226	0.0102545	0	0
M_P4'	-10.1388	-10.192	-10.2181	-9.44689	-9.45505	-9.17856	-10.183	-9.36017	-0.822791	0.000930688	0.00692605	-0.822791	0
N_P4'	-8.44689	-8.58058	-8.71559	-8.59128	-8.83838	-8.89616	-8.58102	-8.77527	0.194253	0.185074	0.264391	0	0
P_P4'	-8.13876	-8.09516	-8.14009	-8.11128	-8.05816	-8.06609	-8.12467	-8.07851	-0.0461585	0.105811	0.168455	0	0
Q_P4'	-8.31564	-8.19202	-8.19819	-8.28461	-8.36194	-8.50537	-8.23528	-8.38398	0.148693	0.122616	0.190258	0	0
R_P4'	-8.08432	-8.15249	-8.12123	-8.25424	-8.07654	-8.10262	-8.11935	-8.14447	0.0251202	0.691219	0.744748	0	0
S_P4'	-7.73068	-7.77698	-7.77331	-7.70992	-7.79209	-7.74416	-7.76032	-7.74872	-0.0115993	0.700757	0.751331	0	0
T_P4'	-8.19535	-8.33958	-8.43382	-8.48165	-8.2122	-8.27949	-8.32291	-8.32445	0.00153224	0.98922	0.994183	0	0
V_P4'	-8.13876	-8.25342	-8.23827	-8.08432	-8.19202	-8.25873	-8.21015	-8.17836	-0.0317947	0.636413	0.695059	0	0
W_P4'	-12.2542	-11.777	-11.8031	-10.3798	-11.3619	-10.5807	-11.9448	-10.7741	-1.17063	0.025561	0.0580108	0	0
Y_P4'	-10.8392	-10.3619	-10.4811	-9.37977	-8.96963	-9.03047	-10.5608	-9.12662	-1.43414	0.00171999	0.0107827	0	0
A_P5'	-7.73068	-7.83838	-7.84886	-7.68946	-7.70373	-7.80305	-7.80597	-7.73208	-0.073892	0.22827	0.306918	0	0
C_P5'	-12.8392	-12.777	-12.8031	-10.2542	-9.96963	-9.86446	-12.8064	-10.0294	-2.77697	1.92093e-05	0.00128292	-2.77697	0
D_P5'	-7.98122	-8.02209	-7.9957	-8.75174	-8.19202	-8.41074	-7.99967	-8.4515	0.451827	0.0504911	0.095042	0	0
E_P5'	-7.68946	-7.55459	-7.61983	-7.59128	-7.55459	-7.68758	-7.62129	-7.61115	-0.0101453	0.864035	0.891217	0	0
F_P5'	-9.75174	-9.77698	-9.74416	-8.98122	-8.52905	-9.14009	-9.75763	-8.88346	-0.874172	0.00884738	0.027487	0	0
G_P5'	-7.95656	-7.95255	-7.89616	-7.77311	-8.07654	-8.10262	-7.93509	-7.98409	0.0489978	0.672294	0.730578	0	0
H_P5'	-9.75174	-9.77698	-9.63313	-9.13876	-9.6615	-9.74416	-9.72062	-9.51481	-0.205808	0.349991	0.430758	0	0
I_P5'	-8.93231	-8.71809	-8.77331	-8.62975	-8.33958	-8.10262	-8.8079	-8.35731	-0.450589	0.0527585	0.0987293	0	0
K_P5'	-7.81684	-7.74723	-7.7881	-7.8392	-7.79209	-7.96175	-7.78406	-7.86435	0.08029	0.21434	0.293115	0	0
L_P5'	-8.05784	-8.00439	-7.97863	-7.48165	-7.54176	-7.35459	-8.01362	-7.45934	-0.554284	0.000758369	0.00612486	-0.554284	0
M_P5'	-10.0318	-9.96963	-9.9957	-9.59128	-9.19202	-8.89616	-9.99906	-9.22649	-0.772572	0.0187669	0.0458429	0	0
N_P5'	-8.62975	-8.93568	-8.86446	-8.8392	-8.77698	-8.74416	-8.80996	-8.78678	-0.0231795	0.82204	0.854067	0	0
P_P5'	-8.16678	-8.17212	-8.12123	-7.81684	-8.17212	-7.9957	-8.15338	-7.99489	-0.158491	0.201586	0.281693	0	0
Q_P5'	-8.13876	-8.25342	-8.21809	-9.03185	-8.33958	-8.12123	-8.20343	-8.49755	0.294127	0.347503	0.430758	0	0
R_P5'	-8.41294	-8.40775	-8.43382	-8.00631	-8.23266	-8.41074	-8.41817	-8.21657	-0.201599	0.160788	0.237107	0	0
S_P5'	-7.62975	-7.90251	-7.86446	-7.73068	-8.13313	-8.08424	-7.79891	-7.98268	0.183774	0.295424	0.376218	0	0
T_P5'	-8.19535	-8.15249	-8.14009	-7.98122	-8.11402	-7.9957	-8.16264	-8.03031	-0.13233	0.043105	0.0851456	0	0
V_P5'	-8.08432	-7.88621	-7.9957	-7.88501	-8.04002	-7.91228	-7.98874	-7.94577	-0.0429732	0.595444	0.657041	0	0
W_P5'	-12.2542	-12.3619	-12.388	-10.5173	-10.2745	-10.8031	-12.3347	-10.5316	-1.80313	0.000337544	0.00478313	-1.80313	0
Y_P5'	-9.66928	-10.192	-10.0661	-9.66928	-9.19202	-9.25873	-9.9758	-9.37334	-0.602452	0.0499875	0.0946509	0	0
A_P6'	-7.66928	-7.71809	-7.67377	-7.86192	-7.79209	-7.77331	-7.68705	-7.80911	0.12206	0.0172424	0.0427719	0	0
C_P6'	-11.8392	-12.777	-12.0661	-11.0318	-10.2745	-10.3006	-12.2274	-10.5356	-1.6918	0.0108313	0.0308161	0	0
D_P6'	-7.95656	-7.87009	-7.86446	-8.08432	-7.96963	-8.01298	-7.89704	-8.02231	0.125271	0.0489758	0.0941678	0	0
E_P6'	-7.5538	-7.39616	-7.43382	-7.51728	-7.85415	-7.4932	-7.46126	-7.62154	0.160281	0.271731	0.35204	0	0
F_P6'	-9.37977	-9.50396	-9.58066	-8.66928	-9.15249	-8.83343	-9.48813	-8.88507	-0.603067	0.0171061	0.0427653	0	0
G_P6'	-7.81684	-7.87009	-7.81816	-8.11128	-7.76203	-7.96175	-7.83503	-7.94502	0.109993	0.344383	0.428803	0	0
H_P6'	-9.93231	-9.6615	-9.68758	-9.51728	-9.77698	-9.86446	-9.76046	-9.71957	-0.0408942	0.777539	0.815778	0	0
I_P6'	-8.48165	-8.50396	-8.55513	-8.41294	-8.68952	-8.80305	-8.51358	-8.63517	0.12159	0.360573	0.43968	0	0
K_P6'	-8.16678	-7.9869	-8.01298	-7.90847	-7.71809	-8.01298	-8.05555	-7.87984	-0.17571	0.163095	0.239405	0	0
L_P6'	-7.79481	-7.87009	-7.7881	-7.37977	-7.45505	-7.10262	-7.81767	-7.31248	-0.505188	0.0101938	0.0303093	0	0
M_P6'	-10.1388	-10.04	-9.9957	-9.37977	-9.55459	-9.58066	-10.0582	-9.50501	-0.553152	0.00188703	0.0111824	0	0
N_P6'	-9.08432	-9.11402	-9.06609	-8.41294	-8.74723	-8.63313	-9.08814	-8.59777	-0.490373	0.00777032	0.025634	0	0
P_P6'	-8.34735	-8.60706	-8.63313	-8.05784	-8.02209	-8.1592	-8.52918	-8.07971	-0.449467	0.0108819	0.0308161	0	0
Q_P6'	-8.31564	-8.63402	-8.60666	-8.31564	-8.55459	-8.30055	-8.51877	-8.39026	-0.128513	0.381967	0.459509	0	0
R_P6'	-8.62975	-8.50396	-8.48113	-8.19535	-8.17212	-8.06609	-8.53828	-8.14452	-0.393761	0.00296072	0.0141408	0	0
S_P6'	-7.77311	-7.77698	-7.81816	-7.90847	-7.68952	-7.7881	-7.78942	-7.79536	0.00594393	0.931461	0.955345	0	0
T_P6'	-8.05784	-8.2122	-8.21809	-8.48165	-7.93568	-8.68758	-8.16271	-8.3683	0.205592	0.422619	0.500882	0	0
V_P6'	-8.13876	-8.13313	-8.17856	-7.81684	-8.07654	-8.08424	-8.15015	-7.99254	-0.157613	0.151397	0.224292	0	0
W_P6'	-11.2542	-11.5546	-11.5807	-10.2542	-10.3619	-10.9286	-11.4632	-10.5149	-0.948241	0.0154268	0.0391791	0	0
Y_P6'	-10.1388	-10.04	-10.1401	-9.8392	-9.40775	-9.21809	-10.1063	-9.48835	-0.617942	0.0296777	0.0638793	0	0
A_P7'	-7.68946	-7.67544	-7.6601	-7.66928	-7.68952	-7.9957	-7.675	-7.78483	0.109833	0.358392	0.439408	0	0
C_P7'	-12.8392	-12.777	-12.8031	-10.0318	-9.6615	-9.68758	-12.8064	-9.79364	-3.01277	1.52907e-05	0.00128292	-3.01277	0
D_P7'	-8.16678	-8.17212	-8.17856	-8.22449	-8.4793	-8.34362	-8.17249	-8.34914	0.176652	0.0745717	0.129652	0	0
E_P7'	-7.5538	-7.6477	-7.67377	-7.68946	-7.60706	-7.86446	-7.62509	-7.72032	0.0952322	0.321169	0.404623	0	0
F_P7'	-9.59128	-9.55459	-9.63313	-8.93231	-9.04002	-8.6601	-9.593	-8.87748	-0.715523	0.00343037	0.0150373	0	0
H_P7'	-10.1388	-9.55459	-9.53004	-9.93231	-9.45505	-9.53004	-9.74113	-9.63913	-0.101996	0.702025	0.751331	0	0
I_P7'	-8.93231	-8.80735	-8.92859	-8.62975	-8.68952	-8.74416	-8.88942	-8.68781	-0.201608	0.0186777	0.0458429	0	0
K_P7'	-7.88501	-7.95255	-7.94507	-7.8392	-7.71809	-7.92859	-7.92754	-7.82863	-0.098919	0.200647	0.28161	0	0
L_P7'	-7.79481	-8.05816	-7.97863	-7.5538	-7.32852	-7.28999	-7.94387	-7.39077	-0.553097	0.00816555	0.0263937	0	0
M_P7'	-10.6693	-10.5546	-10.3006	-9.44689	-10.114	-9.30055	-10.5081	-9.62049	-0.887655	0.0313432	0.0659857	0	0
N_P7'	-8.66928	-8.74723	-8.68758	-8.75174	-8.31755	-8.60666	-8.70136	-8.55865	-0.142714	0.333183	0.416478	0	0
P_P7'	-8.48165	-8.33958	-8.38802	-8.00631	-8.19202	-7.83343	-8.40308	-8.01059	-0.392495	0.0245308	0.0566564	0	0
Q_P7'	-8.44689	-8.31755	-8.43382	-8.79481	-8.40775	-8.50537	-8.39942	-8.56931	0.169891	0.240224	0.321639	0	0
R_P7'	-8.31564	-8.33958	-8.30055	-8.05784	-8.52905	-8.36565	-8.31859	-8.31752	-0.00107498	0.994183	0.994183	0	0
S_P7'	-7.90847	-7.80735	-7.80305	-7.61039	-7.70373	-7.71559	-7.83963	-7.67657	-0.163056	0.0271513	0.0607582	0	0
T_P7'	-8.00631	-8.07654	-8.08424	-7.98122	-8.00439	-8.25873	-8.0557	-8.08145	0.0257523	0.794042	0.827666	0	0
V_P7'	-8.31564	-8.43121	-8.38802	-7.95656	-8.05816	-7.88022	-8.37829	-7.96498	-0.413306	0.00256628	0.0136868	0	0
W_P7'	-12.8392	-12.777	-12.0661	-10.5173	-10.04	-10.5807	-12.5608	-10.3793	-2.18144	0.00192463	0.0111979	0	0
Y_P7'	-10.1388	-10.04	-9.9957	-9.08432	-9.40775	-8.96175	-10.0582	-9.15127	-0.906888	0.0028951	0.0140368	0	0
A_P8'	-7.36347	-7.44308	-7.46915	-7.79481	-7.9869	-7.68758	-7.42523	-7.8231	0.397862	0.0129375	0.0353845	0	0
C_P8'	-12.8392	-12.777	-12.8031	-11.0318	-9.6615	-9.74416	-12.8064	-10.1458	-2.66058	0.00390134	0.0159406	0	0
D_P8'	-8.11128	-8.11402	-8.10262	-7.88501	-8.31755	-8.12123	-8.1093	-8.10793	-0.00137559	0.991752	0.994183	0	0
E_P8'	-7.59128	-7.55459	-7.55513	-7.5538	-7.54176	-7.75866	-7.567	-7.61808	0.0510782	0.514009	0.591517	0	0
F_P8'	-9.8392	-9.96963	-10.0661	-8.98122	-9.07654	-8.9957	-9.95831	-9.01782	-0.940485	0.000199584	0.00399167	-0.940485	0
G_P8'	-7.81684	-7.79209	-7.77331	-8.11128	-7.85415	-7.89616	-7.79408	-7.95387	0.159788	0.118562	0.185726	0	0
H_P8'	-9.75174	-9.6615	-9.68758	-9.25424	-9.40775	-9.38802	-9.70027	-9.35	-0.350272	0.00315318	0.0146234	0	0
I_P8'	-8.70992	-8.68952	-8.60666	-8.34735	-8.50396	-8.60666	-8.6687	-8.48599	-0.182709	0.089085	0.148361	0	0
K_P8'	-7.75174	-7.77698	-7.77331	-8.00631	-7.83838	-7.94507	-7.76734	-7.92992	0.16258	0.0307416	0.0652011	0	0
L_P8'	-8.08432	-8.23266	-8.23827	-7.22449	-7.54176	-7.43382	-8.18508	-7.40003	-0.785056	0.00176692	0.0107827	0	0
M_P8'	-10.6693	-10.192	-10.1401	-10.0318	-9.31755	-9.38802	-10.3338	-9.57914	-0.754657	0.0559276	0.102855	0	0
N_P8'	-8.93231	-9.07654	-8.9957	-8.66928	-8.77698	-8.68758	-9.00152	-8.71128	-0.290239	0.00555189	0.0199853	0	0
P_P8'	-8.59128	-8.45505	-8.53004	-8.44689	-7.88621	-8.41074	-8.52546	-8.24794	-0.277511	0.208785	0.289225	0	0
Q_P8'	-8.28461	-8.27448	-8.17856	-8.5538	-8.07654	-8.30055	-8.24589	-8.3103	0.0644126	0.673502	0.730578	0	0
R_P8'	-8.34735	-8.23266	-8.30055	-8.25424	-8.2122	-8.50537	-8.29352	-8.32394	0.0304154	0.770421	0.81097	0	0
S_P8'	-7.64938	-7.82278	-7.83343	-7.66928	-7.88621	-7.70152	-7.76853	-7.75234	-0.0161956	0.866151	0.891217	0	0
T_P8'	-8.25424	-8.23266	-8.27949	-8.25424	-8.05816	-8.36565	-8.25546	-8.22602	-0.029447	0.762186	0.804949	0	0
V_P8'	-8.28461	-8.38466	-8.36565	-7.90847	-8.11402	-7.5936	-8.34498	-7.87203	-0.472948	0.0375502	0.0751004	0	0
W_P8'	-11.8392	-12.04	-12.0661	-11.8392	-11.04	-10.5807	-11.9818	-11.1533	-0.828476	0.091472	0.150108	0	0
Y_P8'	-10.2542	-10.114	-10.0661	-8.79481	-9.40775	-9.14009	-10.1448	-9.11422	-1.03057	0.00520606	0.0198213	0	0

[truncated: 1 more sheets: spec_MPro_24hrs]
